# Supplementary material for: Olfactory Bulb Proteomics Reveals Widespread Proteostatic Disturbances in Mixed Dementia and Guides for Potential Serum Biomarkers to Discriminate Alzheimer Disease and Mixed Dementia Phenotypes
Source: Preprints.org preprint supplement (doi:10.20944/preprints202104.0748.v1), 2021-04-28
Supplement: Supplementary file 1 [file supplementary]

## Sheet: Identified proteins
Majority protein IDs	Protein names	Gene names	LFQ intensity C1218	LFQ intensity C1277	LFQ intensity C1368	LFQ intensity C1403	LFQ intensity C1438	LFQ intensity C1563	LFQ intensity C1576	LFQ intensity DMIX1	LFQ intensity DMIX3	LFQ intensity DMIX4	LFQ intensity DMIX5	LFQ intensity DMIX7	LFQ intensity DMIX8	Peptides	Razor + unique peptides	Unique peptides	Sequence coverage [%]	Unique + razor sequence coverage [%]	Unique sequence coverage [%]	Mol. weight [kDa]	Q-value	Score	Intensity	MS/MS count
A0A024R216;Q9Y3E1	Hepatoma-derived growth factor-related protein 3	HDGFRP3	920179968	852540032	685329984	689160000	1004800000	926460032	779260032	394390016	795030016	667320000	756200000	810560000	755870016	8	7	6	36.5	32.5	32.5	22.619	0	323.31	10561000000	111
A0A024R442;E7ETB3;Q9ULA0;E7EMB6;C9JBE1	Aspartyl aminopeptidase	DNPEP	593729984	732590016	796419968	805209984	638409984	701400000	640179968	858129984	669680000	619900032	817100032	441340000	677790016	17	17	17	48.8	48.8	48.8	51.998	0	205.61	9327500000	130
A0A024R4E5;Q00341;H0Y394	Vigilin	HDLBP	235760000	229780000	270169984	260740000	265130000	254090000	228530000	244790000	237020000	224150000	206920000	206120000	239530000	17	17	17	18.1	18.1	18.1	141.44	0	57.239	3197500000	75
B5MCT8;C9JM19;A0A024R4M0;P46781	40S ribosomal protein S9	RPS9	0	0	0	0	0	0	0	0	0	0	0	0	57753000	3	3	3	18	18	18	16.628	0.0097784	1.9421	93953000	5
A0A024R6I7;A0A0G2JRN3		SERPINA1	0	0	311320000	0	0	0	0	0	0	345809984	0	0	0	30	1	1	66	3.8	3.8	46.708	0	128.31	487430000	8
A0A024RA52;P25787	Proteasome subunit alpha type;Proteasome subunit alpha type-2	PSMA2	1550000000	1404700032	1526300032	1536700032	1706800000	1479299968	1471100032	1624600064	1552700032	1484999936	1674400000	1510400000	1702400000	11	11	11	53.8	53.8	53.8	25.898	0	277.34	21332000000	181
A0A024RBG1		NUDT4	0	0	22604000	0	0	0	0	0	0	0	0	0	0	6	1	1	44.2	6.1	6.1	20.434	0.0041152	2.4021	55940000	3
A0A024RCR6;A0A0G2JK23;P46379;A0A0G2JL47	Large proline-rich protein BAG6	BAT3;BAG6	329600000	431089984	378369984	396680000	357630016	348860000	323030016	347529984	301300000	329600000	325110016	416420000	386129984	15	15	15	21.6	21.6	21.6	118.7	0	97.476	5047000000	77
A0A087WV90;E9PDN5;A0A087WTU7;A0A075B6G3;P11532;E7EQR9;E7EQS5;F8VX32;E7ESB2;H0Y304;F5GZY3	Dystrophin	DMD	365500000	432500000	407320000	503680000	364120000	500310016	409860000	481080000	544880000	464560000	447820000	538190016	421110016	20	17	17	6.8	6.2	6.2	426.09	0	196.58	5920700000	93
A0A0C4DH90;A0A075B6H7;A0A0C4DH55;P01624	Ig kappa chain V-III region POM	IGKV3OR2-268;IGKV3-7;IGKV3D-7	0	0	0	0	0	0	0	0	0	0	0	0	69752000	1	1	1	7.8	7.8	7.8	12.586	0.0018944	2.8141	671610000	14
A0A075B6K5;P80748	Ig lambda chain V-III region LOI	IGLV3-9	0	0	0	0	0	0	0	0	0	0	0	0	27336000	1	1	1	13.9	13.9	13.9	12.332	0	22.545	328400000	10
A2NJV5;A0A0A0MRZ7;A0A075B6S2;A0A087X0Q4;A0A0C4DH68;A0A075B6R9;A0A075B6S6;A0A075B6P5;A0A087WW87;P06310;P01615;P01614	Ig kappa chain V-II region RPMI 6410;Ig kappa chain V-II region FR;Ig kappa chain V-II region Cum	IGKV A18;IGKV2D-26;IGKV2D-29;IGKV2-40;IGKV2-24;IGKV2D-24;IGKV2D-30;IGKV2D-28	0	0	0	0	0	0	133770000	0	0	0	0	0	0	2	2	2	16.7	16.7	16.7	13.085	0	8.4617	1523300000	10
A0A075B727;P16284	Platelet endothelial cell adhesion molecule	PECAM1	0	0	0	0	0	21616000	0	0	0	0	0	0	0	1	1	1	7	7	7	26.219	0.0032251	2.4851	37927000	3
A0A075B730;P58107	Epiplakin	EPPK1	0	0	0	0	0	0	0	0	0	0	56954000	0	0	10	2	2	10.1	2.7	2.7	553.12	0.00051454	3.9522	154180000	3
E9PQG4;A0A087WVF8;A0A0A0MRM1;A0A087WX83;A0A075B749;Q5VU43	Myomegalin	PDE4DIP	0	0	19306000	0	0	0	0	0	0	0	0	0	0	2	2	2	4.7	4.7	4.7	85.353	0.0051802	2.2835	81671000	2
M3ZCP1;A0A075B788;P08575;E9PKH0	Receptor-type tyrosine-protein phosphatase C	PTPRC	0	0	0	60750000	0	0	0	0	0	0	0	0	0	3	3	3	4.2	4.2	4.2	82.981	0.00098546	3.3268	186450000	15
A0A075B7B1;H0YL34		SYNM	1376800000	1763900032	2386899968	2126800000	1851699968	2494700032	1926499968	2530700032	2919000064	2308000000	1796800000	1467800064	2525499904	51	51	2	48.9	48.9	1.7	140.16	0	323.31	28173000000	392
A0A075B7B5;B7ZM87;O75044;Q5VZB4;A0A286YEY3;P0DMP2;P0DJJ0	SLIT-ROBO Rho GTPase-activating protein 2;SLIT-ROBO Rho GTPase-activating protein 2B;SLIT-ROBO Rho GTPase-activating protein 2C	SRGAP2;SRGAP2B;SRGAP2C	233800000	213030000	218170000	185020000	202720000	162320000	195240000	178800000	154380000	149230000	156850000	178500000	173450000	12	12	10	18.6	18.6	15.6	90.908	0	51.473	2563300000	61
A0A075B7B8		IGHV3OR16-12	0	0	0	0	0	0	0	0	0	0	0	33478000	0	2	1	1	18.8	9.4	9.4	12.874	0.0045589	2.3742	268210000	10
A0A075B7D9;Q92804	TATA-binding protein-associated factor 2N	TAF15	0	95204000	0	98201000	96505000	96352000	0	0	0	0	0	0	0	7	5	5	21.8	18.7	18.7	48.839	0	30.628	721040000	22
A0A087X0V7;A0A087WYH9;A0A075B7G8;J3KPL8;O00213;V9GYR7;V9GY97	Amyloid beta A4 precursor protein-binding family B member 1	APBB1	98104000	92310000	83501000	116170000	125980000	126520000	104280000	0	81713000	146190000	0	92980000	90787000	7	7	7	24.4	24.4	24.4	49.772	0	21.212	1240500000	35
E9PKG6;A0A087WSV8;P80303;H0YD18;Q2L696	Nucleobindin-2;Nesfatin-1	NUCB2;Nucb2	0	45357000	0	0	61972000	0	0	0	0	0	0	0	0	4	4	4	16	16	16	40.368	0.00029036	6.7577	295640000	15
E9PIR7;F8W809;A0A087WSW9;A0A182DWI3;A0A087WSY9;Q16881;E2QRB9;E9PKD3	Thioredoxin reductase 1, cytoplasmic	TXNRD1	2330099968	2167399936	1868300032	2303899904	2169100032	2091800064	2318299904	2393999872	2492699904	1779500032	2540699904	2023200000	2514700032	24	24	23	62.4	62.4	59.3	53.166	0	323.31	30226000000	274
K7ERP4;A0A087X2I2;A0A087WT12;P36969;K7EJ20;K7EKX7;K7ENB4;R4GNE4;A0A0A0MTT1	Glutathione peroxidase;Phospholipid hydroperoxide glutathione peroxidase, mitochondrial	GPX4	2025299968	1705600000	1984499968	1712999936	1809500032	1691600000	1561299968	1898800000	1738499968	1681200000	1894800000	1974700032	1962499968	9	9	9	62.6	62.6	62.6	17.629	0	65.107	25122000000	162
A0A087WT18;Q96A73	Putative monooxygenase p33MONOX	KIAA1191	0	0	0	0	0	0	0	45634000	0	0	0	0	0	4	4	4	20.1	20.1	20.1	24.51	0.00051335	3.8995	71839000	6
F5H107;A0A087WTA1;A0A0A0MR20;E9PDN6;Q9C0A0	Contactin-associated protein-like 4	CNTNAP4	0	0	0	0	77215000	0	0	0	0	0	0	0	0	4	4	4	4	4	4	140.03	0	24.757	269410000	13
A0A087WTA5;E7ERK9;Q9UI10	Translation initiation factor eIF-2B subunit delta	EIF2B4	0	49676000	51810000	0	0	0	0	63621000	0	0	52675000	0	0	6	6	6	16.7	16.7	16.7	57.495	0	9.6709	389700000	18
A0A087WTA8;P08123	Collagen alpha-2(I) chain	COL1A2	527520000	395830016	705409984	447750016	221700000	295670016	455280000	0	64191000	284769984	0	0	91420000	4	4	4	4.5	4.5	4.5	129.15	0	43.005	3543300000	33
A0A087WZ85;A0A0A0MSX4;A0A087WTM1;Q9Y6N7	Roundabout homolog 1	ROBO1	0	0	0	0	0	0	0	0	0	0	28369000	0	0	3	3	2	2.2	2.2	1.4	166.73	0.0009879	3.3564	111400000	8
A0A087WTS0;P18283;H0YJK8	Glutathione peroxidase;Glutathione peroxidase 2	GPX2	95661000	0	0	0	85591000	0	0	73716000	83443000	0	0	0	140420000	7	7	7	40.2	40.2	40.2	21.804	0	8.1882	552620000	27
A0A087WTU8;A0A0C4DFQ7;A0A0A0MS16;A0A1B0GTZ7;Q9NZI2	Kv channel-interacting protein 1	KCNIP1	0	0	0	0	0	0	0	0	23355000	0	0	0	0	2	2	2	11.1	11.1	11.1	24.625	0.0012198	3.1921	141480000	14
A0A0A0MRA9;B7Z2N1;A0A087WTW9;P49758;B7Z7N5	Regulator of G-protein signaling 6	RGS6	157690000	167600000	166600000	133550000	101660000	147360000	121120000	152540000	101660000	102830000	111910000	153460000	79570000	9	7	7	22.7	17	17	48.509	0	38.064	1777900000	50
A0A087WU03		HNRNPDL	61719000	0	0	0	0	0	0	60008000	0	0	0	0	0	1	1	1	31.6	31.6	31.6	6.7215	0	12.292	467020000	14
E7ER32;A0A087X287;B0QY83;A0A087WU73;W0Z7M9;Q969V6	MKL/myocardin-like protein 1	MKL1;mkl1	0	0	0	15775000	0	0	0	0	0	0	0	0	0	1	1	1	3.6	3.6	3.6	85.075	0	11.402	15545000	1
A0A087WUB9;Q8WYA6	Beta-catenin-like protein 1	CTNNBL1	0	0	0	0	0	0	0	0	0	0	0	0	34956000	6	6	6	12	12	12	65.702	0	7.9058	197330000	21
E9PL01;A0A087WUC6;E9PI68;Q15005;E9PRB9	Signal peptidase complex subunit 2	SPCS2	0	0	0	0	0	0	0	0	0	0	39398000	0	0	2	2	2	11.5	11.5	11.5	17.027	0.0097826	1.9437	71308000	8
A0A0A0MQV6;A0A087WUF6;P09038	Fibroblast growth factor;Fibroblast growth factor 2	FGF2	0	0	0	0	55715000320	0	0	0	0	0	0	47217999872	55782998016	4	4	4	13.5	13.5	13.5	30.752	0	11.273	235530000000	15
F5GYK0;A0A0A0MS35;A0A087WUH1;Q7Z4K8;Q5VT61	Tripartite motif-containing protein 46	TRIM46	0	0	0	0	0	0	0	0	0	0	22789000	0	0	4	4	4	6.8	6.8	6.8	69.554	0.00052342	4.2476	167360000	12
A0A087WUK2;O14979	Heterogeneous nuclear ribonucleoprotein D-like	HNRNPDL	1308999936	1144499968	1210099968	1319299968	873929984	1264999936	1009600000	755409984	989129984	887569984	715120000	903340032	908270016	12	11	11	22.3	20.1	20.1	40.04	0	117.01	14189000000	106
A0A087WUN7;H0YJ40;G3V4X6;G3V2S9;Q9GZT3;H0YJW7	SRA stem-loop-interacting RNA-binding protein, mitochondrial	SLIRP	296129984	286150016	0	131130000	231480000	190050000	239160000	152910000	219320000	0	220230000	245350000	244180000	5	5	5	63	63	63	10.353	0	17.222	2714200000	33
A0A087WUQ6;P07203;A0A2R8Y6B6	Glutathione peroxidase;Glutathione peroxidase 1	GPX1	1576400000	1510000000	1746700032	1707200000	1512499968	1626400000	1756400000	1390000000	1311699968	1595399936	1607000064	1709799936	1646200064	17	17	17	85.1	85.1	85.1	21.938	0	120.88	21797000000	225
A0A087WUT6;O60841	Eukaryotic translation initiation factor 5B	EIF5B	52115000	0	0	91034000	85506000	0	82796000	79691000	79392000	0	88941000	94770000	68126000	5	5	5	8.2	8.2	8.2	138.68	0	18.898	956190000	37
A0A087WUT8;O95196	Chondroitin sulfate proteoglycan 5	CSPG5	0	148650000	0	185630000	0	103510000	144240000	0	0	0	0	0	165800000	3	3	3	9.6	9.6	9.6	50.189	0	7.6674	1392700000	20
A0A087X0G7;A0A087WUW6;A0A087X1B1;Q9Y6K9	NF-kappa-B essential modulator	IKBKG	0	0	91559000	0	0	55236000	0	0	0	0	0	0	0	3	3	3	10	10	10	47.256	0.00028161	5.8394	337190000	11
A0A087WUW9;Q9NXU5;A0A0B4J222	ADP-ribosylation factor-like protein 15	ARL15	0	227230000	0	191710000	0	242020000	0	0	0	0	0	0	0	9	9	9	55.9	55.9	55.9	22.876	0	41.09	1495700000	30
F8W7C6;A0A087WV22;X1WI28;P27635;H7C123;H7C2C5	60S ribosomal protein L10	RPL10	0	0	0	0	0	0	0	0	26253000	0	0	0	0	3	3	3	20.2	20.2	20.2	18.565	0.001218	3.1788	28595000	3
A0A087WV46;C9JXA7;Q0VGL1	Ragulator complex protein LAMTOR4;Ragulator complex protein LAMTOR4, N-terminally processed	LAMTOR4	0	0	0	0	0	0	0	0	0	0	0	0	63167000	1	1	1	12.2	12.2	12.2	8.8779	0.0025516	2.5798	489260000	7
X6RCC3;A0A087WV97;Q8WU79	Stromal membrane-associated protein 2	SMAP2	0	0	0	0	0	0	0	0	0	0	0	0	41480000	3	2	2	18.4	13.8	13.8	20.605	0.0016815	2.9667	191680000	6
A0A087WVN8;Q13043	Serine/threonine-protein kinase 4;Serine/threonine-protein kinase 4 37kDa subunit;Serine/threonine-protein kinase 4 18kDa subunit	STK4	0	50543000	56354000	62454000	0	47255000	0	0	0	72826000	0	0	0	3	3	1	24.5	24.5	10.3	17.438	0.00028305	5.9421	406170000	18
A0A087WVQ6;Q00610	Clathrin heavy chain;Clathrin heavy chain 1	CLTC	81151000576	76420997120	61838999552	74457997312	83638001664	65671000064	75594997760	65776001024	60278001664	59221000192	70991003648	74498998272	69048999936	107	107	74	72.8	72.8	55.9	192.06	0	323.31	997010000000	3046
F8W7S5;A0A087WVV2;Q9P2E9	Ribosome-binding protein 1	RRBP1	0	0	0	0	0	0	0	0	0	0	73319000	44863000	41434000	7	7	7	10.8	10.8	10.8	84.325	0	7.6399	555830000	26
E9PRV3;A0A087WVY5;Q96MR6	Cilia- and flagella-associated protein 57	CFAP57	0	0	0	777459968	0	0	0	0	0	0	0	0	0	2	2	2	14.5	14.5	14.5	19.124	0.0051651	2.255	14408000000	23
A0A087WVZ9;P19388;A0A087WWX0;A0A0A0MQR7	DNA-directed RNA polymerases I, II, and III subunit RPABC1	POLR2E	99198000	96797000	0	112100000	0	0	0	0	0	0	0	0	0	4	4	4	24.5	24.5	24.5	21.459	0	77.616	516750000	16
A0A087WW00;P51668;C9J9H9;Q9Y2X8	Ubiquitin-conjugating enzyme E2 D1;Ubiquitin-conjugating enzyme E2 D4	UBE2D1;UBE2D4	0	0	0	0	0	0	0	65670000	0	0	0	0	0	3	2	2	51.4	34.9	34.9	12.421	0	14.327	62201000	2
A0A087WW40;Q9Y371	Endophilin-B1	SH3GLB1	461950016	484880000	477340000	544540032	498080000	477920000	509070016	413950016	482609984	523560000	423169984	436180000	456969984	11	10	10	35.3	33.2	33.2	44.26	0	46.592	6312000000	105
B4DGL8;A0A087WW65;O75027;A0A2R8Y473	ATP-binding cassette sub-family B member 7, mitochondrial	ABCB7	72120000	0	0	0	0	0	59759000	0	0	0	0	0	61323000	5	5	5	13	13	13	77.12	0	10.313	500920000	15
A0A087WW77;Q15334	Lethal(2) giant larvae protein homolog 1	LLGL1	2296300032	2332300032	3092900096	2720900096	2884300032	3063099904	3183600128	3491899904	3617700096	3140800000	2945700096	3229400064	3211000064	31	31	31	40.1	40.1	40.1	114.43	0	301.66	40612000000	381
A0A087WW91		SYN2	0	0	0	0	0	0	0	0	0	0	0	0	70079000	13	1	1	69.2	11.8	11.8	24.319	0.0002791	5.6615	190990000	4
A0A087WWF1;Q8WWX9	Selenoprotein M	SELM	0	0	0	0	0	0	0	0	0	0	11940000	0	0	1	1	1	9.7	9.7	9.7	16.081	0.0020984	2.6363	58979000	4
A0A2R8Y7T6;A0A087WWK8;A0A3B3IRZ4;Q6DN90;A0A3B3IU98;A0A0C4DGT3;A0A2R8Y695	IQ motif and SEC7 domain-containing protein 1	IQSEC1	184610000	217670000	182190000	142460000	182180000	194770000	210770000	159290000	172200000	124610000	212760000	279190016	178490000	11	11	8	16.3	16.3	13.3	108.42	0	140.25	2589100000	79
A0A087WWM4;F8WAN9;H0YNJ6;Q9P2T1;H0YMB3;H0YLV5;H0YK13;H0YLB8	GMP reductase;GMP reductase 2	GMPR2	296000000	267910000	362680000	283289984	280190016	292950016	268960000	336600000	325470016	320649984	316620000	289700000	271660000	12	10	6	52.6	46.6	23.9	38.217	0	96.243	4373900000	77
A0A087WWM6;O43272;E7EQL6	Proline dehydrogenase 1, mitochondrial	PRODH	963400000	1355100032	1602000000	834550016	702760000	650000000	988659968	1017200000	992369984	955310016	1058400000	869480000	1163000064	26	26	26	53.3	53.3	53.3	68.028	0	196.69	14474000000	222
A0A087WWU8;D6R904		TPM3	7256600064	8466800128	7758700032	7285799936	7920099840	8954500096	7109400064	4826699776	6939599872	6973100032	5164299776	5072000000	6302799872	25	25	0	67.4	67.4	0	26.42	0	323.31	93098000000	332
A0A087WXC5;E7ESZ7;O95299	NADH dehydrogenase [ubiquinone] 1 alpha subcomplex subunit 10, mitochondrial	NDUFA10	3022500096	2801799936	2560100096	2251599872	2057299968	2764600064	2609499904	1789699968	2211500032	2325299968	2697799936	2763800064	1949699968	15	15	15	42.5	42.5	42.5	40.836	0	237.35	33607000000	247
A0A087WXL6;B7Z879;A0A0G2JS92		VPS11	0	0	0	0	0	0	0	0	50454000	0	0	0	0	21	1	1	32	1.2	1.2	107.81	0.0057984	2.1726	253120000	7
A0A087WXM8;P50895;K7ENU8	Basal cell adhesion molecule	BCAM	148300000	146570000	0	112190000	150860000	118040000	0	0	0	162720000	119000000	0	0	8	8	8	19.6	19.6	19.6	63.693	0	8.643	1191200000	32
A0A087WXN9;Q765P7	MTSS1-like protein	MTSS1L	367600000	388860000	452500000	483940000	441300000	562720000	412340000	666289984	682899968	546400000	507350016	629510016	692640000	14	14	13	31.2	31.2	30	79.797	0	284.94	6995500000	116
A0A087WXP3;E9PEE8;P18564	Integrin beta;Integrin beta-6	ITGB6	0	0	0	0	0	0	0	0	0	0	132270000	0	0	2	2	2	2.6	2.6	2.6	75.849	0.0052036	2.317	1326300000	14
H7BXI1;A0A087WXU3;A0FGR8	Extended synaptotagmin-2	ESYT2	0	0	0	0	0	0	0	0	0	0	80875000	0	0	7	7	7	10.6	10.6	10.6	98.008	0	9.2848	648580000	11
A0A087WY55;Q9NP79;Q5TGM0	Vacuolar protein sorting-associated protein VTA1 homolog	VTA1	1099800064	832550016	831809984	966129984	943260032	969360000	826190016	1135399936	807600000	819880000	801070016	889529984	1036600000	9	9	9	40	40	40	31.102	0	123.67	12112000000	117
A0A087WY71;E9PFW3;Q96CW1;C9JJ47	AP-2 complex subunit mu	AP2M1	1861299968	1638899968	1579500032	1778700032	1763699968	1464600064	1643900032	1237200000	1225299968	1084300032	1371299968	1410899968	1376400000	15	15	15	44.2	44.2	44.2	49.526	0	135.07	20614000000	181
A0A087WY82;Q9Y624	Junctional adhesion molecule A	F11R	0	0	0	0	0	0	27324000	0	0	0	0	0	0	3	3	3	11.8	11.8	11.8	30.197	0.00075911	3.6857	222520000	16
H3BN27;A0A087WYE0;Q9Y342	Plasmolipin	PLLP	0	0	0	0	0	0	0	0	0	0	0	0	124640000	1	1	1	18.5	18.5	18.5	13.105	0.00028185	5.867	1885200000	14
A0A087WYF6;E7ESD2;A0A0A0MR88;A0A096LPC5;Q9Y4E1;Q641Q2;F8W7U3;J3KP36	WASH complex subunit FAM21C;WASH complex subunit FAM21A	FAM21A;FAM21C	87493000	0	75584000	144810000	139000000	127300000	0	137550000	117810000	0	100620000	75740000	103360000	12	12	12	15.3	15.3	15.3	136.57	0	71.075	1264000000	51
A0A087WYF7;Q6UXV4;A0A087WUX8	MICOS complex subunit MIC27	APOOL	0	0	69776000	0	0	82405000	0	0	71129000	0	75063000	0	0	6	6	6	32.1	32.1	32.1	29.205	0	18.297	560220000	17
A0A2U3TZH4;A0A087WYF8;Q53GG5;D6RAF1	PDZ and LIM domain protein 3	PDLIM3	0	0	0	0	0	0	0	0	0	0	0	0	200150000	3	3	3	20.8	20.8	20.8	21.754	0	22.39	666550000	6
E9PFH7;A0A087WYG2;Q9UPT6	C-Jun-amino-terminal kinase-interacting protein 3	MAPK8IP3	693849984	479060000	400729984	445420000	491590016	487830016	394609984	419129984	316340000	414240000	358700000	407660000	336630016	24	24	21	22.5	22.5	20.5	146.68	0	153.27	5740900000	123
A0A087WYP2;Q8IZQ5;H0YE28	Selenoprotein H	C11orf31;SELH	0	0	0	0	0	0	0	153770000	0	0	0	0	0	2	2	2	17.4	17.4	17.4	13.303	0.0018824	2.7562	1131200000	10
A0A087WYR0;P09132	Signal recognition particle 19 kDa protein	SRP19	0	0	0	0	0	0	0	0	0	0	0	0	22294000	1	1	1	12.5	12.5	12.5	13.654	0	52.241	234150000	10
A0A087WYR3;O43399;A0A087WZ51	Tumor protein D54	TPD52L2	630630016	509460000	456300000	627049984	541310016	657139968	440390016	581699968	775649984	375060000	637190016	576499968	0	13	13	13	58.1	58.1	58.1	23.764	0	176.62	7255900000	56
A0A087WYT3;Q15185	Prostaglandin E synthase 3	PTGES3	2441499904	2531699968	1307399936	2538299904	2756300032	3405900032	3032600064	2059900032	2113299968	2028999936	2343800064	2243899904	2322700032	6	6	6	36	36	36	19.155	0	94.794	31904000000	110
A0A087WYU2;Q96S19;H3BS73;H3BNB2;H3BRT2	UPF0585 protein C16orf13	C16orf13	99394000	93789000	0	105820000	121280000	111450000	104270000	86370000	106320000	92209000	81184000	95720000	101380000	4	4	4	25	25	25	20.428	0	7.4589	1270000000	33
A0A087WZ32;A0A087X038;A8K727;Q9HB19;E5RHB5	Pleckstrin homology domain-containing family A member 2	PLEKHA2	37937000	0	0	0	0	0	39813000	0	0	0	0	0	0	2	2	2	5.6	5.6	5.6	41.21	0.0012231	3.2258	226690000	20
M0R1T4;A0A087WZK0;P49366	Deoxyhypusine synthase	DHPS	0	0	0	0	0	0	0	0	11986000	0	0	0	0	1	1	1	17.4	17.4	17.4	12.939	0.009789	1.9478	13055000	2
D6REQ6;D6RHI9;A0A087WZM2;O00584	Ribonuclease T2	RNASET2	0	0	0	0	0	0	67413000	0	0	0	0	0	0	5	5	5	21.1	21.1	21.1	25.308	0.00028409	6.0516	602390000	11
A0A087WZN1;O43837;A0A087X2E5	Isocitrate dehydrogenase [NAD] subunit, mitochondrial;Isocitrate dehydrogenase [NAD] subunit beta, mitochondrial	IDH3B	2737299968	2375500032	2411399936	1955399936	1627000064	2252400128	2378599936	2027800064	2298899968	1841699968	2344999936	2431099904	2452300032	20	20	20	52.2	52.2	52.2	42.41	0	257.49	30735000000	241
A0A087WZT0;M0QZ22;Q5PRF9;M0QY61;M0R0X3	Protein Smaug homolog 2	SAMD4B	0	0	0	0	33852000	0	0	0	0	0	0	0	0	3	3	3	5.9	5.9	5.9	72.413	0.00028241	5.9132	163710000	10
J3KPF9;A0A087X011;E9PES4;Q9Y496	Kinesin-like protein;Kinesin-like protein KIF3A	KIF3A	150970000	135170000	140100000	151950000	135350000	191550000	168630000	80103000	130560000	175550000	199870000	212820000	112970000	15	15	14	26.5	26.5	24.9	80.354	0	31.88	2009600000	83
A0A087X054;Q9Y4L1;E9PJ21;A0A087WWI4;K7EQK2	Hypoxia up-regulated protein 1	HYOU1	1602499968	1314000000	1184400000	1431299968	1415100032	1340800000	1482400000	1016700032	1201799936	1063500032	1443200000	1281400064	1148899968	30	30	26	41.5	41.5	36.3	104.78	0	244.99	17524000000	255
A0A087X0A8;D6RGG3;Q99715	Collagen alpha-1(XII) chain	COL12A1	302240000	0	120900000	281769984	297800000	154130000	260050000	240690000	231800000	322710016	206540000	210420000	337300000	19	19	19	16.2	16.2	16.2	203.11	0	78.203	3087800000	68
A0A087X0D5;P09668;E9PKT6	Pro-cathepsin H;Cathepsin H mini chain;Cathepsin H;Cathepsin H heavy chain;Cathepsin H light chain	CTSH	151680000	126910000	0	156660000	0	0	171360000	149190000	225050000	0	0	0	0	4	4	4	20.7	20.7	20.7	36.269	0	20.969	1815300000	38
A0A087X0M8;O00533	Neural cell adhesion molecule L1-like protein;Processed neural cell adhesion molecule L1-like protein	CHL1	289689984	447300000	433160000	413150016	522849984	273200000	533720000	137970000	268870016	210450000	393240000	268190000	196710000	18	18	18	19	19	19	130.79	0	112.69	4722200000	96
H0YKH1;A0A087X0P4;H0YLF5;A0A0A0MTI0;P40424;H0YLD4;H0YLT4;H0YLB0;H0YLM3;U3KQA2;F8WA05;H0Y5D0;Q5JS98;P40426	Pre-B-cell leukemia transcription factor 1;Pre-B-cell leukemia transcription factor 3	PBX1;PBX3	98203000	94357000	77669000	0	0	140800000	0	86067000	0	0	0	0	0	5	5	3	50.3	50.3	32.7	17.635	0	62.339	648910000	17
A0A087X0Q9;Q9BVL4	Selenoprotein O	SELO	0	0	0	0	20682000	0	0	0	0	0	0	0	0	3	3	3	8.1	8.1	8.1	73.338	0	8.0277	152960000	10
A0A087X0R6;Q9UMY4	Sorting nexin-12	SNX12	252250000	308630016	271560000	334529984	278500000	358769984	258300000	419230016	345440000	301249984	209400000	302040000	339190016	11	11	11	68.6	68.6	68.6	19.825	0	55.946	4101600000	68
A0A087X0S5;P12109	Collagen alpha-1(VI) chain	COL6A1	3855300096	2814400000	2586099968	4424200192	6734300160	6418400256	3042099968	3278400000	2729499904	4136600064	2742500096	3059300096	3244400128	28	28	28	35.7	35.7	35.7	108.34	0	323.31	50846000000	388
A0A087X0V5;P29728;F8W1C5	2-5-oligoadenylate synthase 2	OAS2	0	0	0	0	0	0	0	0	0	0	183630000	0	0	6	6	6	8.5	8.5	8.5	83.234	0.00029078	6.7796	274600000	8
A0A087X0W7;A0A087WT95;P49753	Acyl-coenzyme A thioesterase 2, mitochondrial	ACOT2	0	0	253220000	0	0	0	0	0	0	0	162950000	187050000	0	26	1	1	78.4	5.7	5.7	46.292	0	23.305	1578200000	19
Q2TAM5;E9PKH5;A0A087X0W8;Q04206;E9PI38;E9PQS6;E9PKV4;A0A087WVP0	Transcription factor p65	RELA	92715000	104840000	125530000	129590000	136950000	126130000	111390000	111190000	101480000	129660000	100300000	95338000	133440000	6	6	6	17.8	17.8	17.8	42.868	0	9.6	1548300000	47
A0A0G2JN29;A0A087X117;Q15155;A0A0G2JP90;A0A087WW46;J3KN36;P69849;Q5JPE7	Nodal modulator 1;Nodal modulator 3;Nodal modulator 2	NOMO1;NOMO3;NOMO2	101350000	87393000	75201000	94519000	105430000	100100000	0	0	0	0	96080000	95400000	100800000	10	10	10	10.1	10.1	10.1	139.54	0	13.677	1038200000	37
A0A087X159;P81877	Single-stranded DNA-binding protein 2	SSBP2	0	0	0	0	0	0	0	16237000	0	0	0	0	0	1	1	1	3.5	3.5	3.5	38.754	0.0032258	2.4876	15380000	1
A0A087X165;Q9C0H9;A0A087WVV7	SRC kinase signaling inhibitor 1	SRCIN1	380600000	349900000	344080000	354729984	381190016	283969984	332670016	370070016	256400000	199090000	390209984	280070016	322040000	19	19	19	21.1	21.1	21.1	130.46	0	143.88	4520200000	110
A0A087X1A5;Q5JW30;O95793	Double-stranded RNA-binding protein Staufen homolog 1	STAU1	0	0	0	0	47749000	0	0	0	0	0	0	0	0	3	3	3	7.7	7.7	7.7	54.945	0.00027159	5.155	199950000	18
A0A087X1B2;B9A018;Q53GS9	U4/U6.U5 tri-snRNP-associated protein 2	USP39	0	0	0	0	0	0	0	0	0	0	22617000	0	0	1	1	1	3.3	3.3	3.3	56.399	0.0016807	2.9595	248790000	10
A0A087X1E4;P53365	Arfaptin-2	ARFIP2	73847000	65241000	93775000	61744000	106080000	0	101670000	54460000	77662000	0	79280000	60169000	100430000	8	8	8	29.1	29.1	29.1	41.595	0	17.37	948320000	47
A0A087X1G7;O60613;A0A0J9YX89;A0A3B3IT39	15 kDa selenoprotein	2015-09-01	0	0	0	0	0	0	0	0	0	0	0	0	29436000	2	2	2	15.2	15.2	15.2	17.942	0.00050787	3.7317	274300000	6
A0A087X1H5;Q15057;A0A0U1RQT1	Arf-GAP with coiled-coil, ANK repeat and PH domain-containing protein 2	ACAP2	9320200	0	0	0	0	0	0	0	0	0	0	0	0	7	7	7	11.2	11.2	11.2	88.02	0	17.825	185980000	9
A0A087X1K9;E5RGR0;O75608;B4DP64	Acyl-protein thioesterase 1	LYPLA1	224800000	214780000	193350000	178120000	0	233070000	198070000	228550000	0	145630000	0	218130000	266510000	4	4	4	38.6	38.6	38.6	17.981	0	11.257	2553300000	34
A0A087X1P2;Q9UN70	Protocadherin gamma-C3	PCDHGC3	0	0	0	0	0	0	0	0	43971000	0	0	0	0	3	3	3	12.4	12.4	12.4	26.481	0.0083572	2.0482	115870000	5
Q6PID9;A0A087X1T7;H0YMF1;P16112	Aggrecan core protein;Aggrecan core protein 2	ACAN	158610000	147620000	110890000	126580000	107590000	109520000	160940000	104630000	0	0	103850000	168710000	0	5	5	5	9.2	9.2	9.2	79.615	0	20.911	1453600000	30
A0A087X1W8;A0A0A0MTJ8;X5DQS5;Q9BY67;A0A087X0T8	Cell adhesion molecule 1	CADM1	845049984	1140999936	1036300032	1070099968	838899968	1104400000	1047699968	634499968	769409984	624899968	686240000	683160000	887329984	12	12	12	50	50	50	45.676	0	285.45	12003000000	129
A0A087X1Z3;Q9UL46;H0YM70	Proteasome activator complex subunit 2	PSME2	1364199936	1021900032	2294200064	1717799936	1627299968	1095699968	1192499968	2007000064	1605900032	1061699968	1648099968	1274800000	1155299968	14	14	14	66.9	66.9	66.9	29.126	0	259.64	20124000000	195
A0A087X211;Q8TCG1;F8WF26;F8WAX6	Protein CIP2A	KIAA1524	0	0	0	0	0	0	0	0	0	0	0	0	78083000	2	2	2	3.3	3.3	3.3	102.28	0.0057932	2.1682	494170000	5
F8WCZ6;A0A087X232;P09871	Complement C1s subcomponent;Complement C1s subcomponent heavy chain;Complement C1s subcomponent light chain	C1S	0	0	0	0	0	0	0	0	0	0	72089000	0	0	3	3	3	6.7	6.7	6.7	57.519	0.00026903	4.8863	242760000	9
A0A087X241;Q2NKQ1	Small G protein signaling modulator 1	SGSM1	0	0	36512000	0	0	0	0	0	0	0	0	0	28840000	3	3	3	3.1	3.1	3.1	122.91	0.00052854	4.4639	204150000	11
A0A087X256;Q2M389	WASH complex subunit 7	KIAA1033	45464000	49560000	45488000	54998000	76149000	0	63256000	65629000	87026000	45550000	76296000	79903000	70692000	8	8	8	9.3	9.3	9.3	136.5	0	32.078	834970000	46
A0A087X279;P09913	Interferon-induced protein with tetratricopeptide repeats 2	IFIT2	57145000	0	443350016	63326000	0	0	40861000	97019000	0	0	796230016	0	0	14	14	14	32.3	32.3	32.3	55.984	0	64.83	1846900000	51
A0A087X294;O75914	Non-specific serine/threonine protein kinase;Serine/threonine-protein kinase PAK 3	PAK3	161250000	207860000	0	188900000	205410000	214820000	243670000	147990000	162330000	194230000	162100000	183640000	234630000	20	10	10	45.3	27.6	27.6	60.626	0	54.655	2460300000	54
Q6PKC6;E9PBK6;E9PDU5;A0A087X295;Q9NNW5	WD repeat-containing protein 6	WDR6	0	0	0	0	0	0	0	0	0	0	0	31062000	0	2	2	2	7.3	7.3	7.3	32.111	0	9.0476	54743000	4
A0A0G2JSB3;I3L1D4;B0QYY7;S4R469;F8VR27;F8VZY7;B0QYV1;B0QYY4;A0A087X2B1;A0A0G2JRA5;J3KNW3;B7Z1U7;F8VZG9;A0A286YEU2;O43251;Q9NWB1;B0QYY6;A0A3B3ITL7;J3QQZ2;J3QRF4;F8VRS4;A6NFN3	RNA binding protein fox-1 homolog;RNA binding protein fox-1 homolog 2;RNA binding protein fox-1 homolog 1;RNA binding protein fox-1 homolog 3	RBFOX1;RBFOX2;RBFOX3	0	0	61816000	53801000	62393000	66414000	0	0	0	0	0	0	0	3	3	3	13.4	13.4	13.4	20.252	0	19.137	462480000	13
A0A087X2H1;Q9ULT8;H0YJD4	E3 ubiquitin-protein ligase HECTD1	HECTD1	0	0	0	0	0	0	0	25390000	0	0	0	0	0	4	4	4	1.7	1.7	1.7	289.63	0.00052233	4.2132	103180000	6
A0A087X2I1;P62333;H0YJC0	26S protease regulatory subunit 10B	PSMC6	1082200064	1110000000	1142099968	1148400000	927600000	1158499968	1148999936	1021600000	915249984	824620032	961900032	933900032	1035299968	21	21	21	65.5	65.5	65.5	45.796	0	109.29	13714000000	190
A0A088AWL3;O75376;E7EVU5;E7EW50;J3KS51	Nuclear receptor corepressor 1	NCOR1	0	0	0	0	0	0	0	427729984	0	0	0	0	0	2	2	2	1	1	1	258.98	0.0095986	1.9618	50702000000	19
A0A096LNH6;Q14185	Dedicator of cytokinesis protein 1	DOCK1	0	0	0	0	0	0	0	0	61374000	0	0	53115000	0	5	5	5	3.3	3.3	3.3	217.75	0	7.9726	166030000	19
A0A096LNV3;A0A096LP02;Q9Y508	E3 ubiquitin-protein ligase RNF114	RNF114	0	0	0	0	0	56019000	0	64422000	41936000	0	0	0	0	3	3	3	18.6	18.6	18.6	20.885	0	7.4736	264260000	15
G5E9D8;A0A096LP62;C9J2H1;Q86UX2	Inter-alpha-trypsin inhibitor heavy chain H5	ITIH5	0	0	0	0	34998000	0	0	0	0	0	0	0	0	4	4	4	6.7	6.7	6.7	78.437	0.0005102	3.7966	68303000	5
M0QZU1;A0A096LPE0;P40429	60S ribosomal protein L13a	RPL13A	0	0	0	0	0	0	0	0	32327000	0	0	0	0	1	1	1	23.9	23.9	23.9	4.7176	0.0051989	2.3056	111850000	8
A0A0A0MTC7;A0A0A0MQS9;Q16363	Laminin subunit alpha-4	LAMA4	92616000	77795000	108130000	85738000	346640000	0	117900000	57318000	68116000	86567000	0	0	58202000	12	12	12	9.9	9.9	9.9	201.82	0	49.298	1178200000	57
A0A0A0MQU3;P62837;D6RFM0;D6RAH7;H9KV45;A0A087WY85;P61077;D6RAW0	Ubiquitin-conjugating enzyme E2 D2;Ubiquitin-conjugating enzyme E2 D3	UBE2D2;UBE2D3	480369984	615270016	507480000	491420000	655080000	561769984	719230016	861809984	815990016	0	883150016	672400000	745840000	4	4	3	40.8	40.8	28.6	16.681	0	173.47	9005100000	56
A0A0A0MQU4;Q96I15;H7C3V9;H7C277	Selenocysteine lyase	SCLY	100850000	0	0	0	0	94603000	0	89512000	0	0	0	0	0	9	9	9	25.8	25.8	25.8	48.793	0	13.459	539780000	28
C9JP00;A0A0A0MQX8;Q9NR56;H7C4T5;B1AKI6;Q9NUK0	Muscleblind-like protein 1;Muscleblind-like protein 3	MBNL1;MBNL3	0	0	0	0	0	0	0	71710000	57401000	0	71507000	0	0	3	3	2	8	8	5.7	37.898	0.00051361	3.9063	391960000	15
A0A3B3ISH2;A0A0A0MQY7;Q5VU97	VWFA and cache domain-containing protein 1	CACHD1	44482000	0	0	30552000	0	0	0	0	0	0	0	0	0	3	3	3	4.9	4.9	4.9	127.25	0	10.629	172100000	8
A0A2R8YDS2;A0A0A0MQZ2;B7ZCA0;A0A2R8Y6T2;Q96PV0	Ras/Rap GTPase-activating protein SynGAP	SYNGAP1	582009984	641900032	419750016	646860032	368680000	754979968	550940032	495049984	348969984	216430000	463100000	589489984	358129984	28	28	25	32.3	32.3	30.4	137.26	0	102.79	6674200000	137
A0A0A0MQZ4;Q8N3J5;V9GYZ5	Protein phosphatase 1K, mitochondrial	PPM1K	0	0	0	0	0	0	89284000	0	0	0	0	0	0	3	3	3	11.6	11.6	11.6	35.988	0.0002867	6.313	406750000	9
A0A0A0MR05;Q9BVC4;H3BM50;H3BPU5;H3BPT1;H3BN58;H3BSZ4;H3BR25	Target of rapamycin complex subunit LST8	MLST8	0	69501000	0	0	0	89062000	0	59500000	0	0	0	0	0	5	5	5	21.7	21.7	21.7	36.039	0	12.608	443130000	23
Q5T093;Q5T092;A0A0A0MR06;Q5T091;O15258	Protein RER1	RER1	22155000	0	0	0	0	0	0	0	0	0	0	0	0	1	1	1	11.1	11.1	11.1	13.439	0.0055841	2.1844	22155000	1
A0A0A0MR09;P43378	Protein-tyrosine-phosphatase;Tyrosine-protein phosphatase non-receptor type 9	PTPN9	54266000	61146000	42986000	33282000	33377000	0	0	0	58061000	42388000	0	37966000	0	6	6	6	11.5	11.5	11.5	66.953	0.00028852	6.5665	583150000	28
A0A0A0MR39;A0A0A0MQW0;Q9P2K5;A0A087WUT0	Myelin expression factor 2	MYEF2	530540000	549320000	443280000	497889984	530550016	487880000	397990016	284240000	369569984	535060000	349220000	401750016	349030016	15	15	15	29.7	29.7	29.7	64.149	0	30.054	5778000000	89
A0A0A0MR85;A6NNT0		GSTM4	182720000	125110000	183000000	411840000	0	0	182820000	553859968	503990016	0	379600000	426430016	273620000	22	8	0	85.3	43.1	0	25.563	0	47.14	3283500000	46
A0A0A0MRA5;B7Z4B8;Q9BUJ2;M0R3F1	Heterogeneous nuclear ribonucleoprotein U-like protein 1	HNRNPUL1	305409984	327880000	434110016	436369984	320950016	456049984	325449984	421649984	319009984	316689984	304529984	381700000	358380000	11	11	11	19.5	19.5	19.5	85.939	0	93.974	4898400000	79
A0A0A0MRA8;A0A0A0MSA4;A0A1B0GTF8		EPB41L3	14286000128	13301000192	12807000064	16661000192	11690999808	15715999744	13585999872	14590000128	10798000128	11290999808	10817000448	10595000320	13338999808	55	55	0	65.1	65.1	0	102.29	0	323.31	178660000000	1113
A0A0A0MRE5;Q9ULH1;H0YBF7	Arf-GAP with SH3 domain, ANK repeat and PH domain-containing protein 1	ASAP1	76477000	70598000	0	82010000	0	78599000	66782000	0	69791000	0	0	72364000	72148000	7	7	6	9.4	9.4	8.5	124.77	0	17.113	700840000	33
A0A0A0MRE6;O94967	WD repeat-containing protein 47	WDR47	515489984	568529984	410809984	280950016	370400000	545630016	443860000	567830016	260300000	238320000	411160000	230760000	629070016	19	19	19	24.2	24.2	24.2	98.701	0	94.941	5727500000	127
A0A0A0MRF4;P49406;S4R3W9	39S ribosomal protein L19, mitochondrial	MRPL19	0	0	0	28199000	28681000	0	0	0	0	0	0	0	0	4	4	4	24.9	24.9	24.9	19.131	0.00052632	4.4022	305340000	21
A0A0A0MRG2;E9PG40;P05067;H7C0V9	Amyloid beta A4 protein;N-APP;Soluble APP-alpha;Soluble APP-beta;C99;Beta-amyloid protein 42;Beta-amyloid protein 40;C83;P3(42);P3(40);C80;Gamma-secretase C-terminal fragment 59;Gamma-secretase C-terminal fragment 57;Gamma-secretase C-terminal fragment 50;C31	APP	379580000	218830000	121880000	196620000	159440000	160250000	183160000	253690000	242890000	231560000	124070000	268380000	219720000	9	9	9	18.8	18.8	18.8	75.109	0	25.428	2825700000	53
A0A0A0MRI2;Q9UNH7;G3V5X9	Sorting nexin-6;Sorting nexin-6, N-terminally processed	SNX6	423760000	374160000	394220000	382889984	401640000	363880000	416880000	525470016	305080000	369040000	371220000	309729984	394500000	16	15	15	37.6	37.6	37.6	47.804	0	76.318	5162500000	109
A0A0A0MRJ3;Q8NEY1	Neuron navigator 1	NAV1	0	38759000	0	0	0	0	0	0	0	0	0	0	0	9	9	9	7.4	7.4	7.4	197.4	0	14.588	285580000	17
A0A0A0MRJ6;H7BY58;P22061;F6S8N6;A0A3F2YNX8	Protein-L-isoaspartate O-methyltransferase;Protein-L-isoaspartate(D-aspartate) O-methyltransferase	PCMT1	7868299776	7889900032	7023699968	7179500032	6850999808	7370299904	7089299968	6092599808	5744500224	6013100032	6501000192	5370200064	6052100096	15	15	15	56.5	56.5	56.5	30.315	0	323.31	94503000000	305
F8W8M4;A0A0A0MRL6		ABLIM1	1039100032	1439900032	1059200000	1599800064	1348400000	1308300032	1251500032	1608099968	1664099968	1526499968	1269500032	1372099968	1655900032	34	34	1	56.8	56.8	2.8	81.104	0	235.79	18739000000	262
A0A0A0MRL7;P55210;Q5SVL2	Caspase-7;Caspase-7 subunit p20;Caspase-7 subunit p11	CASP7	0	0	53475000	0	0	0	0	0	0	0	0	0	0	2	2	2	5.7	5.7	5.7	43.728	0	9.8014	138860000	9
A0A0A0MRM8;E7EW20;Q9UM54;A0A0D9SGC1	Unconventional myosin-VI	MYO6	780729984	729720000	851150016	1013900032	761409984	852689984	900760000	832800000	877609984	930550016	851360000	914329984	857409984	46	46	46	42.5	42.5	42.5	145.01	0	199.18	11196000000	267
S4R402;S4R341;S4R349;A0A0A0MRM9;Q14978	Nucleolar and coiled-body phosphoprotein 1	NOLC1	26662000	0	0	0	40179000	0	0	0	54283000	0	0	0	29719000	1	1	1	32.6	32.6	32.6	5.0538	0.0062153	2.1418	300550000	12
A0A0A0MRR7;P09234	U1 small nuclear ribonucleoprotein C	SNRPC	0	0	0	0	0	0	0	0	0	0	0	0	39999000	2	2	2	16.7	16.7	16.7	19.687	0	7.2017	362110000	14
A0A0C4DG97;A0A0A0MRS5;F8W946;Q9BXM9;Q8N450;C9JD05	FSD1-like protein	FSD1L	343889984	255290000	214820000	179190000	226050000	132750000	271280000	249390000	204720000	208700000	211250000	191670000	344900000	13	13	13	36.2	36.2	36.2	55.807	0	68.344	3071900000	93
B6VEX4;A0A0A0MRT6;Q8IZP0	Abl interactor 1	ABI1	610350016	717260032	658649984	780419968	667209984	782160000	664590016	638830016	610790016	780360000	518900000	604630016	747809984	15	15	10	36.6	36.6	27.5	43.294	0	98.715	8744900000	107
A0A0A0MT17;A0A0A0MSY0;A0A0A0MRT8;O75602	Sperm-associated antigen 6	SPAG6	0	0	0	0	0	0	16910000	0	0	0	0	0	0	1	1	1	10.5	10.5	10.5	21.123	0.0020989	2.6372	18495000	1
B4DZ84;D3DX48;A0A0A0MRU0;A0A0D9SFF8;D3DX49;A0A0C4DH75;Q14168	MAGUK p55 subfamily member 2	MPP2	2274500096	2206400000	2036999936	2071600000	1753200000	2018200064	1822300032	2152600064	1654400000	1396199936	2123699968	1870400000	1864800000	28	28	26	63.8	63.8	61.4	60.516	0	314.18	26839000000	254
A0A0A0MRX1;Q12926;B1AM48	ELAV-like protein;ELAV-like protein 2	ELAVL2	130870000	0	0	93673000	0	96500000	0	0	82972000	0	108840000	127080000	0	9	5	2	25.7	18	7.5	42.632	0	17.558	846120000	26
A0A0A0MS08;P01857;A0A0A0MS07	Ig gamma-1 chain C region	IGHG1	6536900096	16026000384	12835000320	10499999744	13841999872	4027099904	8419599872	7647600128	7468299776	13406999552	11447000064	6252700160	9187399680	15	15	6	51.9	51.9	26.1	43.911	0	323.31	135870000000	498
A0A0A0MS29;H7C433		MFF	0	0	0	0	0	0	0	0	0	0	0	0	25434000	8	1	1	51.6	5.9	5.9	25.302	0.0016738	2.9082	355220000	12
A0A0A0MS41;Q9BWM7;A0A1P0AYU5;S4R3N9	Sideroflexin;Sideroflexin-3	SFXN3	1651900032	2042700032	2023000064	1880000000	1628999936	1499600000	1939800064	2052000000	1558899968	1205400064	1764999936	2095100032	1992499968	18	18	17	66.7	66.7	60.7	35.503	0	195.19	25540000000	211
A0A0A0MS45;J3KNI1;Q9H9E3;J3KRB5	Conserved oligomeric Golgi complex subunit 4	COG4	0	0	0	0	0	0	0	0	0	0	11369000	0	0	2	2	2	4.3	4.3	4.3	87.183	0.00050813	3.748	38839000	3
A0A0A0MS47;Q96PE5;A0A0A0MTN4	Opalin	OPALIN	162110000	202580000	106380000	0	32511000	335820000	28966000	57560000	45836000	0	21412000	218980000	46036000	5	5	5	50.4	50.4	50.4	14.389	0	18.654	1337200000	38
A0A0A0MS51;A0A0A0MT01;P06396	Gelsolin	GSN	25084000256	21418999808	26720000000	28861999104	25678000128	28210999296	25636999168	27716999168	26297999360	32201000960	25624000512	21788000256	28213999616	38	38	11	60	60	25.3	82.525	0	323.31	360040000000	1154
A0A0A0MS54;P22694;A0A087WVC4;B1APG2;B1APF8;B1APF9;B1APG3	cAMP-dependent protein kinase catalytic subunit beta	PRKACB	1384400000	1436199936	1216499968	1199100032	1195500032	1096199936	1283399936	1486800000	1501100032	1368999936	1290099968	1313799936	1315100032	15	15	1	47.1	47.1	4.8	41.308	0	323.31	17944000000	170
A0A0A0MS69;Q14123	Calcium/calmodulin-dependent 3,5-cyclic nucleotide phosphodiesterase 1C	PDE1C	0	0	0	0	0	0	0	48802000	0	0	0	0	0	6	4	4	9.8	6.8	6.8	86.924	0.0032303	2.5091	185030000	14
A0A0A0MS87;G3V578;H0YJT9;G3V5L7		NDRG2	851750016	484630016	637849984	661360000	885030016	702499968	869910016	1062899968	1126899968	620689984	1182599936	960960000	1011600000	16	2	0	68.8	6.2	0	39.544	0	316.94	11574000000	102
A0A0A0MSA7;A0A0U1RQK7;O43432	Eukaryotic translation initiation factor 4 gamma 3	EIF4G3	47592000	38171000	57151000	53026000	0	83884000	50859000	53538000	0	0	45554000	56910000	0	9	6	6	6.5	4.9	4.9	180.5	0.00029138	6.809	604040000	25
A0A0A0MSA9;A0A0C4DG49;P15151	Poliovirus receptor	PVR	0	0	0	54668000	0	0	0	0	0	0	0	0	0	2	2	2	6.4	6.4	6.4	42.882	0.0016799	2.9537	187010000	7
A0A0A0MSB4;Q6ZN50;Q969R2;H7C368;H7C428;H7C1R2	Oxysterol-binding protein;Oxysterol-binding protein 2	OSBP2	0	0	0	0	0	0	0	9137100	0	0	0	0	0	4	2	2	8.8	4.6	4.6	72.218	0.00098863	3.3707	33766000	2
A0A0A0MSB8;Q9UPT5;B4DJ07;A0A0A0MRE1	Exocyst complex component 7	EXOC7	184720000	179310000	226990000	228260000	196060000	212710000	179810000	182960000	187900000	225390000	208780000	196050000	0	16	16	16	28.7	28.7	28.7	78.808	0	36.809	2626200000	82
A0A0A0MSI8;O00471;F8W9B8	Exocyst complex component 5	EXOC5	200630000	206940000	175410000	161400000	202630000	161140000	182100000	155810000	133850000	254800000	121830000	171940000	184820000	16	16	16	32.1	32.1	32.1	82.118	0	94.26	2192800000	84
A0A0A0MSJ0;Q86XP3	ATP-dependent RNA helicase DDX42	DDX42	0	0	107060000	0	96193000	77124000	0	0	89629000	0	109770000	95517000	0	7	7	7	13	13	13	77.813	0	17.122	786050000	31
A0A0A0MSK3;Q53F23;A0A0C4DH47;P24557	Thromboxane-A synthase	TBXAS1	0	0	0	0	0	0	0	0	0	0	0	0	11345000	1	1	1	2.2	2.2	2.2	52.417	0.004561	2.3757	72362000	13
A0A0A0MSK4;A0A0A0MRC4;Q86YR5;A0A087WVF5	G-protein-signaling modulator 1	GPSM1	108290000	116740000	0	93555000	94042000	0	103760000	0	81819000	0	0	76400000	0	10	10	10	18.7	18.7	18.7	74.481	0	15.751	948710000	37
A0A0A0MSK5;J3KN66;Q5JTV8;H0Y4R4	Torsin-1A-interacting protein 1	TOR1AIP1	73736000	0	70292000	73983000	81966000	80664000	73848000	0	72485000	83292000	62758000	76092000	93678000	7	7	7	19.7	19.7	19.7	52.406	0	15.74	921220000	40
A0A0A0MSK6;Q13017	Rho GTPase-activating protein 5	ARHGAP5	66344000	0	87276000	96780000	68475000	73078000	89447000	0	0	85323000	0	0	89448000	10	10	10	8.4	8.4	8.4	171.68	0	14.857	1016200000	41
A0A0A0MSQ0;P13797	Plastin-3	PLS3	563640000	463660000	502030016	461040000	574110016	413820000	575619968	448620000	591219968	490910016	521910016	604739968	535590016	25	18	16	51.2	40.8	36.6	69.334	0	136.8	7104100000	118
E7EUA2;A6NHU9;A0A0A0MSQ6;Q9UPX8;H7C1X5;E7EX50;H0Y7S5;B7ZKU9	SH3 and multiple ankyrin repeat domains protein 2	SHANK2	0	0	0	0	0	0	0	0	0	0	17741000	0	0	4	4	4	3.8	3.8	3.8	134.8	0.00052507	4.3322	186590000	7
A0A0A0MSS8;P42330;S4R3Z2	Aldo-keto reductase family 1 member C3	AKR1C3	1294800000	1205900032	1172199936	1657299968	1309400064	1536300032	1603399936	1405900032	2087399936	1670000000	774220032	1173500032	1487900032	17	17	11	65	65	47.7	36.867	0	149.86	18557000000	177
A0A0A0MSV6;D6R934;P02746	Complement C1q subcomponent subunit B	C1QB	0	0	171030000	245780000	0	0	0	0	0	264920000	220320000	0	0	5	5	5	22.4	22.4	22.4	24.03	0	33.526	1142600000	24
A0A0G2JKZ1;A0A0A0MSV9;O15533;A2AB90;A0A0G2JH37;A0A0A0MT98	Tapasin	TAPBP	0	0	116200000	0	0	0	0	0	0	0	37165000	0	0	6	6	6	22.3	22.3	22.3	47.606	0	22.739	558530000	18
A0A0A0MSW3;P35658	Nuclear pore complex protein Nup214	NUP214	0	0	0	0	0	0	0	0	0	0	0	0	26036000	3	3	3	2.8	2.8	2.8	152.57	0	7.2251	45350000	6
A0A0G2JNZ7;A0A0A0MSX3;Q08345;E7ERI6;E7ETI3;A0A0G2JIA2;E7EPN2;H0Y717;E7EUP7;A2ABL2;A0A0G2JIZ7;E7EQ30;H0Y9F4;E7EPH4;A0A0G2JI85	Epithelial discoidin domain-containing receptor 1	DDR1	0	0	0	0	0	0	0	0	0	0	27745000	0	0	2	2	2	3.7	3.7	3.7	85.467	0.00028106	5.818	51022000	10
A0A2P0CTB1;A0A0A0MT35;Q8TBF2;J3QKK8;A0A0G2JSF1;A0A2P0CTH9;J3KRV9;A0A2P0CU24;A0A0A0MRV4;A0A0G2JRR6;J3KPF6;J3KPF5	Prostamide/prostaglandin F synthase	FAM213B	353790016	0	262260000	344060000	316740000	407520000	490910016	350980000	419670016	273070016	362480000	346590016	457990016	6	6	6	28.1	28.1	28.1	24.278	0	43.388	4671400000	56
H3BUD4;A0A0A0MT40;Q15111	Phosphoinositide phospholipase C;Inactive phospholipase C-like protein 1	PLCL1	0	0	0	0	0	0	0	50922000	0	0	0	51184000	0	3	3	2	3.3	3.3	2.4	114.69	0.0014468	3.0195	406380000	9
A0A0A0MT60;Q5T1M5	Peptidyl-prolyl cis-trans isomerase;FK506-binding protein 15	FKBP15	0	0	0	0	0	0	0	58996000	57431000	0	59663000	0	72167000	7	7	7	7	7	7	136.27	0	30.491	720690000	32
C9JUH3;A0A0A0MT72;Q9BSQ5	Cerebral cavernous malformations 2 protein	CCM2	0	0	0	14468000	0	0	0	0	0	0	0	0	0	5	5	5	23.3	23.3	23.3	38.818	0	7.6903	242000000	13
A0A0A0MT83;P26440;H7C4G6;H0YLC3	Isovaleryl-CoA dehydrogenase, mitochondrial	IVD	1684000000	1324700032	1750700032	1313200000	1288000000	1397200000	1328899968	897440000	1353299968	1056000000	1551200000	1389600000	1204499968	16	16	16	51.2	51.2	51.2	46.65	0	323.31	19466000000	182
A0A0A0MTE2;E9PMT2;F8WD26;J3KP06;Q8WWI1;H0Y424;E9PMS6;E9PMP7	LIM domain only protein 7	LMO7	0	0	0	131310000	0	0	0	0	0	0	0	0	0	6	6	6	6.4	6.4	6.4	158.2	0.000293	6.9233	316790000	19
A0A0A0MTH3;Q13418	Integrin-linked protein kinase	ILK	496089984	468590016	551920000	662800000	513070016	662409984	482860000	549580032	492150016	471630016	533569984	446020000	497440000	17	17	17	41.6	41.6	41.6	54.611	0	31.907	7228100000	111
A0A0R4J2G3;A0A0A0MTJ9;Q6PIU2;H7C046	Neutral cholesterol ester hydrolase 1	NCEH1	153220000	115540000	119260000	106910000	0	96363000	138730000	89750000	106880000	78179000	135820000	112200000	134810000	9	9	9	27.5	27.5	27.5	49.062	0	15.211	1470400000	34
A0A0A0MTN0;Q13617;Q5T2B5	Cullin-2	CUL2	269560000	236600000	251030000	235940000	265500000	270089984	247740000	234460000	213260000	329030016	207240000	261490000	243240000	17	17	17	28.1	28.1	28.1	88.505	0	26.721	3310000000	95
A0A0A0MTP6;O15357	Phosphatidylinositol 3,4,5-trisphosphate 5-phosphatase 2	INPPL1	0	0	0	0	0	0	0	59221000	0	0	0	0	0	6	6	6	7.2	7.2	7.2	126.52	0	11.124	186350000	12
F5H7G2;A0A0A0MTQ4;Q96B86	Repulsive guidance molecule A	RGMA	0	0	0	0	0	0	0	0	0	29157000	0	0	0	3	3	3	7.9	7.9	7.9	37.627	0.0051662	2.2585	181480000	8
A0A0A0MTS2;A0A2U3TZU2;P06744;K7EQ48;A0A0J9YXP8;A0A0J9YYH3;A0A2R8Y6C7;A0A0J9YX90	Glucose-6-phosphate isomerase	GPI	25865000960	22795999232	13946999808	16588000256	19791998976	12773999616	15482000384	20930000896	16984999936	15473000448	20056999936	25156999168	15898000384	27	27	19	55.8	55.8	42.9	64.824	0	323.31	266880000000	704
A0A0A0MTS7;A0A0A0MRA3;Q8WZ42	Titin	TTN	0	0	0	56689000	0	0	0	0	0	0	0	0	0	7	7	7	0.2	0.2	0.2	3994.6	0.00099453	3.4446	1493900000	7
A0A0A6YYA0;Q9Y3B3	Transmembrane emp24 domain-containing protein 7	TMED7-TICAM2;TMED7	0	0	187200000	0	213220000	0	236430000	0	236910000	0	179410000	0	196020000	6	6	6	38.3	38.3	38.3	21.233	0	8.9068	2116300000	38
A0A1B0GTF0;A0A1B0GVC4;A0A1B0GV82;A0A1B0GVV2;A0A0A6YYB3;B1AMR4;A0A1B0GTC2;B1AMR3;A0A1B0GV84;A0A1B0GWI5;A0A0A6YYF8;O43307	Rho guanine nucleotide exchange factor 9	ARHGEF9	0	13332000	0	0	0	0	0	0	0	0	0	0	0	4	3	3	15.6	11.8	11.8	31.41	0.0051825	2.2844	14577000	5
A0A0A6YYH1;Q7Z6K5	Arpin	C15orf38-AP3S2;ARPIN	0	0	0	0	0	0	0	170570000	128650000	0	0	0	0	7	7	7	22.8	22.8	22.8	43.881	0	68.088	890720000	25
A0A0A6YYL4;P57737	Coronin;Coronin-7	CORO7-PAM16;CORO7	248800000	379800000	326200000	369800000	294110016	235660000	273689984	375320000	271200000	258920000	269200000	201410000	185580000	18	18	18	34.3	34.3	34.3	114.16	0	70.914	3773500000	80
A0A0B4J1R2;Q9H6R3	Acyl-CoA synthetase short-chain family member 3, mitochondrial	ACSS3	324670016	323790016	402120000	435249984	416310016	471569984	279270016	374369984	370980000	488529984	408990016	402489984	350080000	14	14	14	29.6	29.6	29.6	74.591	0	48.344	4989100000	112
A0A0B4J1R7;Q96B45	UPF0693 protein C10orf32	C10orf32-ASMT;C10orf32	0	0	0	0	0	0	70178000	0	0	0	39938000	0	100980000	2	2	2	28.3	28.3	28.3	11.695	0.00053548	4.7829	320540000	10
A0A0B4J1W3;Q9BXJ9	N-alpha-acetyltransferase 15, NatA auxiliary subunit	NAA15	0	43541000	0	33584000	0	0	0	0	0	0	0	0	0	6	6	6	8	8	8	101.2	0.00028129	5.8262	150540000	9
A0A0B4J1Z1;C9JAB2;Q16629	Serine/arginine-rich splicing factor 7	SRSF7	0	305220000	208170000	358260000	498889984	571089984	434289984	368760000	388089984	414020000	478940000	408950016	419929984	6	5	5	43.8	43.8	43.8	15.763	0	8.0319	5185200000	37
A0A0B4J231;B9A064;P0CG04	Immunoglobulin lambda-like polypeptide 5;Ig lambda-1 chain C regions	IGLL5;IGLC1	1443299968	1562300032	2744499968	3021199872	4527000064	1282200064	1701299968	1703299968	1315800064	1414599936	2715300096	1534400000	1625500032	5	5	2	35.8	35.8	12.6	23.15	0	323.31	27713000000	80
A0A0B4J293;H0YKX0;Q96EP0;H0YKI4	E3 ubiquitin-protein ligase RNF31	RNF31	0	0	0	0	0	0	0	19450000	0	0	0	0	0	2	2	2	7.5	7.5	7.5	62.584	0.00050994	3.7915	18422000	2
A0A0B4J294;H3BP13;Q9UL33;H3BUK6;H3BPN3;A0A0B4J286	Trafficking protein particle complex subunit 2-like protein	TRAPPC2L	0	0	0	0	0	0	0	0	0	0	86157000	0	0	4	4	4	30.1	30.1	30.1	16.676	0.00027488	5.3531	622010000	19
A0A0B4J2A0;Q9UHJ6	Sedoheptulokinase	TRPV1;SHPK	114030000	113750000	0	95526000	109170000	0	95226000	104630000	123530000	89511000	153380000	120690000	146100000	8	8	8	26.6	26.6	26.6	51.504	0	51.747	1330000000	51
S4R460;A0A0B4J2B5		IGHV3OR16-9	0	1322099968	0	0	0	0	0	0	0	0	191650000	0	198710000	1	1	1	19.8	19.8	19.8	10.429	0	193.39	3003700000	30
Q5W0H4;A0A0B4J2C3;P13693;J3KPG2;H0YCX0;E9PJF7	Translationally-controlled tumor protein	TPT1	1550000000	1377900032	1585400064	1463500032	1353200000	1301200000	681660032	1538899968	1829500032	1098599936	1657200000	1571100032	1886899968	7	7	7	47.9	47.9	47.9	21.525	0	51.005	22181000000	120
P0DPI2;A0A0B4J2D5;A0A096LPI6;A0A096LNH5;H7C1F6;H7C2G3;A0A0B4J2H4		C21orf33	3466400000	3512399872	3638599936	3135099904	3006500096	3744699904	3332000000	2993200128	2763699968	2259500032	3161400064	3339099904	3460000000	14	14	14	69	69	69	28.17	0	323.31	45200000000	206
A0A0C4DFM0;G3V5T0;G3V4T6;A0A0A0MR33;G3V267		GSTZ1	403400000	261830000	563310016	384820000	321870016	607790016	336200000	339470016	374230016	508329984	415390016	279520000	367880000	10	10	1	54.6	54.6	6	24.114	0	37.556	5503700000	93
A0A0C4DFN3;Q99685;A0A3B3ITT3;E7EWX8;H7C599	Monoglyceride lipase	MGLL	1205900032	824460032	829500032	970099968	986200000	836510016	703500032	963649984	992009984	771510016	1000700032	907920000	831560000	10	10	10	45.4	45.4	45.4	34.292	0	72.485	12227000000	130
A0A0C4DFP6;Q9NQ79;Q5T4F6	Cartilage acidic protein 1	CRTAC1	124230000	181640000	103770000	114080000	124610000	88988000	114170000	0	0	0	99879000	94331000	85666000	11	11	11	25.7	25.7	25.7	69.706	0	19.009	1303000000	36
X6RCZ8;X6RJB2;X6RGT4;X6RHD7;A0A0C4DFV0;Q9H469	F-box/LRR-repeat protein 15	FBXL15	0	0	0	0	0	0	0	6587600	0	0	0	0	0	2	2	2	17.8	17.8	17.8	17.351	0.00050761	3.7237	14013000	2
H0YBE7;A0A0C4DFV1;E5RGM0;H0YBU6;Q86UR5	Regulating synaptic membrane exocytosis protein 1	RIMS1	0	0	0	0	0	0	0	0	0	6304500	0	0	0	1	1	1	3.6	3.6	3.6	67.582	0.0018877	2.7848	66292000	6
A0A0C4DFV9;Q01105;A0A087X027;P0DME0	Protein SET;Protein SETSIP	SET;SETSIP	2555099904	2051399936	1012899968	1652600064	2496199936	2273200128	1537400064	1638000000	1754599936	1630899968	1992800000	1543200000	1554899968	9	9	9	41.4	41.4	41.4	31.124	0	216	24682000000	94
A0A2R8YCY2;A0A0C4DFX2;A0A286YFA9;A0A2R8Y5V8;Q5TBA9	Protein furry homolog	FRY	0	0	0	0	0	0	0	0	0	0	7886800	0	0	2	2	2	0.7	0.7	0.7	333.48	0.0016779	2.9423	63296000	12
F8W954;F8WF98;H7C2M8;C9JHL4;A0A0C4DFX9;Q9H3P2;H7C3C2;H7C0W2	Negative elongation factor A	NELFA	0	0	0	0	0	0	0	0	0	0	12752000	0	0	2	2	2	41.9	41.9	41.9	9.508	0	8.5466	57471000	8
A0A0C4DFZ2;P15289	Arylsulfatase A;Arylsulfatase A component B;Arylsulfatase A component C	ARSA	0	0	0	0	0	0	0	0	0	0	0	32122000	0	2	2	2	5.9	5.9	5.9	53.806	0	7.8071	394610000	5
C9J9K3;A0A0C4DG17;P08865;F8WD59	40S ribosomal protein SA	RPSA	3180199936	3328800000	3593600000	3721799936	3852499968	3394099968	3294099968	3121200128	2991399936	2923800064	3328199936	3077700096	3193900032	19	19	19	71.9	71.9	71.9	29.404	0	323.31	44859000000	277
E7EW77;E7EP65;A0A0C4DG21;F8WAL6;Q9NYB9;E9PEZ7;B7Z836	Abl interactor 2	ABI2	381870016	394160000	373910016	373910016	346169984	323569984	431380000	383280000	312190016	344209984	384470016	357820000	404569984	12	7	7	24	16.5	16.5	52.789	0	70.983	5074300000	74
A0A0C4DG34;O95081	Arf-GAP domain and FG repeat-containing protein 2	AGFG2	0	0	85058000	97321000	0	0	0	94363000	0	0	78832000	0	0	3	3	3	25.2	25.2	25.2	17.181	0.00029002	6.7475	545290000	28
A0A0C4DG40;Q8NF91;E7ENN3	Nesprin-1	SYNE1	105550000	424670016	143870000	0	209640000	0	83641000	203320000	122500000	73466000	897390016	445180000	260450000	43	43	42	6.3	6.3	6.2	1005.2	0	122.02	3740600000	120
A0A0C4DG44;O43464	Serine protease HTRA2, mitochondrial	HTRA2	0	126000000	0	0	118320000	0	0	0	0	0	0	0	0	5	5	5	21.3	21.3	21.3	45.112	0	36.445	908070000	20
A0A0C4DG51;Q9NP80	Calcium-independent phospholipase A2-gamma	PNPLA8	67475000	49957000	52985000	0	0	0	0	0	79165000	0	77201000	0	0	5	4	4	9.9	8.8	8.8	71.877	0	9.9138	517260000	22
A0A0C4DG54;Q5R372;A0A0U1RQY6	Rab GTPase-activating protein 1-like	RABGAP1L	0	0	0	0	0	0	0	0	0	0	0	21591000	0	3	3	3	7.7	7.7	7.7	64.999	0.00026824	4.8475	71740000	3
A0A0G2JR20;A0A0C4DG71;A0A0G2JQM2;A0A0G2JR50;Q86SQ7	Serologically defined colon cancer antigen 8	SDCCAG8	0	0	0	0	0	0	0	0	0	0	0	0	615550016	2	2	2	5.1	5.1	5.1	48.116	0.0075305	2.1105	1491100000	2
B3KRD1;B7Z4D2;A0A0C4DG86;Q9NX95	Syntabulin	SYBU	0	0	0	0	0	103460000	96296000	0	0	0	0	0	0	5	4	4	14.7	12.5	12.5	50.463	0	7.2887	532610000	16
A0A0C4DG89;Q7L014	Probable ATP-dependent RNA helicase DDX46	DDX46	0	41525000	42299000	48435000	0	0	0	53156000	0	0	50417000	0	39119000	7	7	7	7.3	7.3	7.3	117.46	0	9.7764	414070000	27
H7C4V0;E9PD56;H7BYG4;W5RWE6;A0A0C4DG95;Q7Z7A4;U3KQS4	PX domain-containing protein kinase-like protein	PXK	0	0	0	34175000	0	0	0	0	0	0	0	0	0	2	2	2	11.9	11.9	11.9	34.701	0.0083425	2.0351	90630000	2
A0A0C4DGA2;O75521;F8WAW4;F1LLU7;C9JB63	Enoyl-CoA delta isomerase 2, mitochondrial	ECI2	942550016	556760000	862449984	570860032	550009984	665049984	666940032	583100032	687049984	622499968	537580032	613580032	608710016	10	10	10	35.2	35.2	35.2	40.183	0	279.73	8545100000	106
A0A0C4DGA7;O94929;D6RHE7;A0A0A0MRD5	Actin-binding LIM protein 3	ABLIM3	0	0	0	0	0	0	0	15284000	0	0	0	0	0	2	2	2	3.8	3.8	3.8	74.167	0.0014486	3.0289	48049000	6
A0A0C4DGU1;A0A0C4DGA9;Q6ZU67	BEN domain-containing protein 4	BEND4	0	0	0	0	0	0	0	0	0	0	85376000	0	0	1	1	1	5.9	5.9	5.9	45.574	0.0019002	2.8335	256390000	3
A0A0C4DGB0;Q9UIL1	Short coiled-coil protein	SCOC	0	0	0	0	0	0	21093000	0	0	0	0	0	0	1	1	1	22	22	22	9.3544	0	12.109	58732000	1
E7ES10;E9PCH5;E7EVY3;B7Z574;A0A0C4DGB5;P20810;H0Y7F0;H0Y9H6;E9PDE4	Calpastatin	CAST	143850000	0	0	192920000	127740000	0	0	0	0	0	0	0	0	5	5	2	12.3	12.3	5	69.749	0	11.949	646590000	16
A0A0C4DGG1;Q9UKS6;E9PIY1	Protein kinase C and casein kinase substrate in neurons protein 3	PACSIN3	0	76596000	0	0	0	0	0	0	0	105200000	0	0	0	5	5	5	16.8	16.8	16.8	46.494	0.00028885	6.6007	682520000	16
A0A2R8Y7I0;A0A2R8YDW2;A0A2R8Y4X2;A0A2R8YD40;A0A2R8YDJ9;A0A2R8Y425;A0A2R8Y5J0;A0A2R8YFK9;A0A2U3TZM0;A0A2R8YFD8;F5GWX5;A0A2R8Y212;A0A2R8Y521;A0A0C4DGG9;Q14839;A0A2R8YE38;A0A2R8Y5M9;A0A2R8Y7M9;A0A2R8Y8C1;Q8TDI0;K7EMY3;A0A2R8YER1;A0A2R8Y445	Chromodomain-helicase-DNA-binding protein 4;Chromodomain-helicase-DNA-binding protein 5	CHD4;CHD5	0	0	0	0	0	0	0	0	0	0	38146000	0	0	5	5	5	11.4	11.4	11.4	68.93	0	8.3643	279300000	11
A0A0C4DGH3;Q9Y6R0;M0QYC2;M0QXQ4;M0R0Q4;M0QZV7	Numb-like protein	NUMBL	0	0	0	0	66220000	0	55514000	67243000	0	0	66935000	85616000	74098000	8	8	7	16.7	16.7	14.1	60.812	0	10.619	718390000	31
A0A0C4DGH8;A0A0C4DGY3;A0A0C4DGX9;Q8TAM2;G3V2W6;G3V2Z9;G3V324;Q86U25;H0YJQ3;A0A0C4DFT4;H0YJX0	Tetratricopeptide repeat protein 8	TTC8	0	0	0	0	0	0	0	19434000	0	0	0	0	0	2	2	2	6.5	6.5	6.5	53.982	0.00026889	4.8783	61329000	4
A0A0C4DGN6;Q9Y2X7;J3QRU8	ARF GTPase-activating protein GIT1	GIT1	862689984	876409984	737529984	864409984	849020032	796520000	927329984	897870016	682700032	469940000	714510016	717640000	662470016	26	26	24	48.3	48.3	45.1	83.131	0	159.69	10578000000	160
A0A0C4DGP3;D3DX46;Q13368	MAGUK p55 subfamily member 3	MPP3	0	262120000	0	0	0	0	0	0	0	0	0	0	0	3	3	3	17.1	17.1	17.1	35.558	0.0034538	2.4769	589040000	8
A0A0C4DGQ5;P04632;K7ELJ7;A0A075B7C0;U3KQE2;K7EM73;K7EIV0	Calpain small subunit 1	CAPNS1	2460300032	2427200000	2756100096	3255600128	2919399936	3281600000	2750400000	4324800000	3926299904	3234899968	3350799872	3224699904	3808900096	14	14	4	65.2	65.2	19.6	33.786	0	323.31	47850000000	329
A0A0C4DGQ6;Q96P16	Regulation of nuclear pre-mRNA domain-containing protein 1A	RPRD1A	0	0	0	0	0	0	32193000	0	0	0	0	0	0	4	1	1	18.7	5.5	5.5	32.916	0.001224	3.2372	199510000	6
J3KRS1;A0A0C4DGQ8;Q6IAN0	Dehydrogenase/reductase SDR family member 7B	DHRS7B	0	0	0	0	0	0	20665000	0	0	0	0	0	0	2	2	2	23.2	23.2	23.2	13.61	0.00053093	4.572	141490000	7
A0A0C4DGR1;B4DHA8;M0QY66;Q9BZC1	CUGBP Elav-like family member 4	CELF4	0	54181000	43658000	0	39745000	41990000	0	0	0	0	35422000	0	0	4	4	2	11.9	11.9	6.5	31.883	0.00075777	3.6696	459950000	19
A0A0C4DGS0;A0A2Y9D025;P56556;R4GN43	NADH dehydrogenase [ubiquinone] 1 alpha subcomplex subunit 6	NDUFA6	881080000	944249984	722000000	683049984	709129984	721420032	808160000	761489984	611480000	464670016	975080000	1020899968	739350016	6	6	6	46.1	46.1	46.1	15.136	0	40.236	10911000000	77
A0A0C4DGS1;P39656	Dolichyl-diphosphooligosaccharide--protein glycosyltransferase 48 kDa subunit	DDOST	197090000	213320000	208560000	233120000	242240000	216370000	242090000	219350000	249170000	193460000	296020000	207250000	165650000	9	9	9	36.4	36.4	36.4	48.799	0	151.02	3089500000	75
R4GMU8;E9PLX3;A0A0C4DGV4;O43504	Ragulator complex protein LAMTOR5	LAMTOR5	0	0	0	0	0	0	0	0	51564000	0	0	0	0	1	1	1	25.3	25.3	25.3	8.2153	0.00053562	4.797	120690000	2
E5RH07;E5RGQ6;A0A0C4DGW2;P57768	Sorting nexin-16	SNX16	0	0	0	0	0	0	0	0	0	0	0	0	0	1	1	1	8.6	8.6	8.6	19.917	0.0053836	2.2451	0	1
A0A0C4DH25;P01619	Ig kappa chain V-III region B6	IGKV3D-20	0	0	0	0	0	0	0	0	0	0	0	0	70496000	1	1	1	13.8	13.8	13.8	12.515	0	34.101	489440000	9
A0A0C4DH76;Q8N6M0	OTU domain-containing protein 6B	OTUD6B	0	0	0	0	0	0	0	0	0	0	0	0	12223000	1	1	1	15.7	15.7	15.7	12.735	0	87.362	104910000	12
A0A0D9SEI0;Q9P0P8	Uncharacterized protein C6orf203	C6orf203	0	0	0	0	0	0	0	0	0	0	0	55357000	0	1	1	1	9	9	9	28.457	0.0051895	2.2895	108530000	2
A0A0D9SEI8;P16989	Y-box-binding protein 3	YBX3	0	0	0	37539000	0	0	0	0	0	0	0	0	0	1	1	1	20.7	20.7	20.7	10.427	0	43.64	36993000	1
A0A0D9SEM4;Q08170	Serine/arginine-rich splicing factor 4	SRSF4	0	0	0	0	0	0	0	0	0	111850000	0	0	0	5	2	2	14.3	5.6	5.6	43.647	0.00099602	3.4543	208390000	6
A0A0R4J2G7;A0A0D9SEP4;A0A1D5RMU6;E7ERL8;Q9ULB1;A0A0U1RRK7;F5GYC7;F8WB18	Neurexin-1	NRXN1	126350000	112270000	98745000	100520000	104220000	95983000	118420000	132370000	0	100260000	0	101880000	88326000	10	7	7	8.4	6.4	6.4	164.25	0	13.147	1282200000	39
H0YM62;D6RG14;D6RB91;A0A1B0GTW4;D6RG21;D6RCM6;Q05BX2;D6RJA7;A0A0D9SET2;D6R942;D6RC63;D8L7E9;D6RJG6;A0A0D9SFD0;A0A0R4J2G5;A0A1B0GV32;A0A0D9SGI5;Q06413;Q02078;Q14814;H0YKY6	Myocyte-specific enhancer factor 2C;Myocyte-specific enhancer factor 2A;Myocyte-specific enhancer factor 2D	MEF2A;MEF2C;MEF2D	0	0	0	0	0	0	0	0	0	0	40141000	0	0	2	2	2	25.9	25.9	25.9	10.058	0.0016706	2.8837	202360000	11
E7ENQ1;G3XAA2;H7C360;G5E948;E7EN19;A0A0D9SEY1;O95819;C9J840;E7EX83;A0A0D9SG62;H7C0P6	Mitogen-activated protein kinase kinase kinase kinase 4	MAP4K4	0	0	0	0	0	0	0	0	0	0	35010000	0	0	14	5	5	11.7	4.4	4.4	132.16	0.00027412	5.3125	157240000	19
Q5T321;A0A0D9SF28;F5GXV7;Q8NFP9	Neurobeachin	NBEA	131180000	165720000	89959000	78426000	173450000	99537000	161250000	182120000	163110000	107910000	199410000	220140000	156370000	23	23	19	8.8	8.8	7.5	327.55	0	34.591	2102600000	97
A0A0D9SF30		NCAM1	1362300032	883160000	1306800000	2418099968	2230599936	1213400064	1416600064	1838099968	2317799936	913470016	1316700032	1113100032	2964800000	14	9	9	55.1	41.2	41.2	47.017	0	323.31	22276000000	148
A0A2R8Y5G6;A0A0D9SFB3;A0A2R8YF78;A0A2R8YCW1;A0A0D9SG12;A0A2R8YFR4;A0A2U3TZJ9;A0A2R8YFS5;A0A2R8Y4A4;A0A2R8Y645;A0A0D9SF53;O00571;A0A2R8YDT5;A0A2R8Y7T2;F6S8Q4;A0A2R8YDH3	ATP-dependent RNA helicase DDX3X	DDX3X	1512499968	1334599936	1645200000	1864199936	1505299968	1525900032	1715900032	1257299968	1524600064	1594200064	1452199936	1400099968	1505200000	28	27	6	53.7	51.9	12.4	69.047	0	156.89	20282000000	242
A0A0D9SF54		SPTAN1	186160005120	222579998720	205650001920	201410002944	220640002048	207789998080	210590007296	208520003584	216420007936	204779995136	201649995776	196129996800	217020006400	221	221	4	77.3	77.3	1.3	282.83	0	323.31	2897700000000	5998
A0A0D9SF70;G5E9L0;Q8N6H7;E9PQP3;E9PMU9;H0YDN9;E9PIY6	ADP-ribosylation factor GTPase-activating protein 2	ARFGAP2	141140000	97572000	111970000	100690000	153710000	164870000	115540000	100340000	105190000	124060000	0	92246000	0	8	8	7	26.5	26.5	23.9	42.153	0	61.92	1404900000	50
A0A0D9SFB1;A0A1B0GU67		DNM1	0	0	0	0	0	0	0	0	0	0	0	0	274800000	52	1	0	68.7	1.8	0	94.016	0.0049853	2.3334	2970000000	11
A0A0D9SFG6;Q99418;Q15438;K7EKA2;K7ERV8;M0R2J0;F8W8E2;K7ENQ8;A0A286YF81;G5E9B7;O43739	Cytohesin-2;Cytohesin-1;Cytohesin-3	CYTH2;CYTH1;CYTH3	88940000	95007000	100200000	91247000	0	0	0	0	81790000	0	97697000	0	0	4	4	4	10.5	10.5	10.5	46.56	0.00026983	4.9586	879390000	22
A0A0D9SFK2;Q92614	Unconventional myosin-XVIIIa	MYO18A	555249984	625280000	753969984	770060032	540600000	713590016	767510016	396400000	433860000	534390016	674720000	769420032	459740000	40	40	40	26.4	26.4	26.4	231.1	0	140.33	8112400000	204
A0A0D9SFU4;O95970	Leucine-rich glioma-inactivated protein 1	LGI1	144340000	121530000	114450000	101630000	109950000	0	140620000	77004000	77206000	89210000	92610000	114100000	105980000	9	9	9	18.8	18.8	18.8	61.172	0	15.516	1370500000	32
A0A0D9SG72;P61764;A0A1B0GWF2;A0A1B0GVQ5;A0A2R8Y5D4;A0A1B0GW76	Syntaxin-binding protein 1	STXBP1	47066001408	47097999360	36971999232	39310000128	35847000064	31868000256	39124000768	25533999104	23697999872	33916000256	29711998976	34771001344	27235999744	48	48	3	77.8	77.8	6.2	66.16	0	323.31	490390000000	1318
A0A0D9SG77;A0A1B0GVL3;Q05086	Ubiquitin-protein ligase E3A	UBE3A	88784000	86001000	82177000	103320000	117360000	0	94092000	83588000	84268000	0	94598000	89205000	112210000	11	11	11	15.4	15.4	15.4	88.082	0	27.367	1140700000	41
A0A0D9SGF6		SPTAN1	1247100032	1210300032	1142899968	1057699968	1004899968	1053400000	1032099968	1782800000	736460032	768040000	556040000	789920000	809760000	220	4	1	75.7	1.9	0.4	287.6	0	192.84	13533000000	63
A0A0D9SGG1;Q13094	Lymphocyte cytosolic protein 2	LCP2	0	0	0	0	0	0	0	0	0	0	1923900	0	0	1	1	1	2.1	2.1	2.1	60.143	0.0057971	2.1695	9724700	3
A0A0E3D6M1;A0A0D9SGI1;Q86UL8;A0A0D9SGF8;A0A0D9SEY4;A0A1B0GTC0;E7EWI0;A0A1B0GTH8;A0A1B0GVS6;A0A0D9SFP3	Membrane-associated guanylate kinase, WW and PDZ domain-containing protein 2	MAGI2	0	0	29442000	0	34591000	0	0	0	0	0	0	0	0	6	6	6	6.2	6.2	6.2	141.7	0.00028686	6.3355	666960000	22
A0A140T9X6;A0A140T9W7;A0A140T9W3;A0A140T9D9;A0A140T9C2;A0A140T939;A0A140T9V0;A0A140T8X0;D0EV57;A0A0G2JPA3;A0A140T9B7;A0A0G2JH66;P30511	HLA class I histocompatibility antigen, alpha chain F	HLA-F	0	0	0	17427000	0	0	0	0	0	0	0	0	0	3	1	1	18.8	7.5	7.5	23.777	0	17.536	32414000	2
H9KV28;A0A2R8Y5N1;A0A140T8Z0;A0A0G2JH68;O60610	Protein diaphanous homolog 1	DIAPH1	68207000	98553000	134960000	64862000	81660000	117300000	99668000	0	115700000	0	0	0	122570000	6	6	6	7	7	7	136.85	0	38.707	1469000000	27
A0A0G2JI36;A0A1W2PSE7;A0A0G2JIF2;A0A0G2JL56;P30455;P30443;A0A1W2PQD0;Q09160	HLA class I histocompatibility antigen, A-36 alpha chain;HLA class I histocompatibility antigen, A-1 alpha chain;HLA class I histocompatibility antigen, A-80 alpha chain	HLA-A	0	0	0	0	0	0	0	0	0	0	0	41524000	0	14	2	2	54.2	4	4	34.216	0.001213	3.0969	58898000	4
F6UB75;A0A140T9U6;A0A140T9T8;A0A140T9R2;A0A140T9R0;A0A140T9I2;A0A140T9C9;A0A140T926;A0A0G2JIJ2;A0A0G2JI43;P28068	HLA class II histocompatibility antigen, DM beta chain	HLA-DMB	0	0	0	0	0	0	0	0	0	0	0	8802100	0	1	1	1	5.7	5.7	5.7	19.438	0.0083682	2.0623	37803000	5
A0A0G2JIW1;P0DMV9;P0DMV8;V9GZ37	Heat shock 70 kDa protein 1B;Heat shock 70 kDa protein 1A	HSPA1B;HSPA1A	25599000576	26883999744	26841999360	30752999424	28284000256	31381999616	28751998976	25208999936	26510000128	40155000832	27580999680	25021999104	26044999680	39	37	24	67	63.9	40.3	70.108	0	323.31	380530000000	1050
A2ACR1;A0A0G2JJA7;P28065	Proteasome subunit beta type;Proteasome subunit beta type-9	PSMB9	0	0	299350016	284520000	275600000	234590000	0	265180000	250840000	304080000	213680000	233910000	256980000	4	4	4	26.5	26.5	26.5	20.96	0	22.318	2993900000	23
A0A0G2JJD3;O95870	Abhydrolase domain-containing protein 16A	ABHD16A	0	0	0	0	0	0	0	0	0	0	44782000	0	0	3	3	3	4.5	4.5	4.5	67.518	0.0045382	2.339	256310000	11
A0A0G2JNZ5;A0A0G2JLB3;P04062;A0A0G2JNZ0	Glucosylceramidase	GBA	0	83549000	0	75734000	111640000	0	64155000	0	0	0	0	85670000	80600000	4	4	4	14.7	14.7	14.7	50.263	0	16.932	845970000	19
A0A0G2JM94;A0A0G2JNK8;A0A0G2JMI0;A0A0G2JNU6;A0A140T8W3;A0A0G2JQ50;A0A0G2JP18;A0A0G2JLV7;Q6GTX8;A0A087X1V4;C9JFQ0;C9IZB2;A0A0G2JLQ0;A0A0G2JMC3;A0A0G2JN10;W4VSQ5;F8WC07;A0A0G2JMB1;A0A0G2JPH6;A8MZ84;D3YTC8;Q6ISS4	Leukocyte-associated immunoglobulin-like receptor 1;Leukocyte-associated immunoglobulin-like receptor 2	LAIR1;LAIR2	0	0	57718000	0	0	0	0	0	0	0	0	0	0	2	2	2	16.2	16.2	16.2	15.143	0.0038911	2.4119	64857000	2
A0A0G2JMB2			0	0	0	0	0	0	0	0	0	0	0	34557000	0	8	1	0	34.7	4.4	0	36.508	0	8.6458	174790000	1
A0A0G2JMH6;P01903;Q30118;A0A0G2JH46	HLA class II histocompatibility antigen, DR alpha chain	HLA-DRA	162390000	313649984	358080000	290830016	0	143590000	215690000	269120000	263930000	313720000	368600000	212290000	222730000	7	7	6	32.7	32.7	28	28.621	0	35.994	3348000000	58
A0A0G2JNZ2;A0A0G2JPP5;Q14160;A0A0G2JMS7	Protein scribble homolog	SCRIB	206970000	272689984	234020000	163970000	277100000	123290000	205620000	229160000	326600000	230440000	262800000	281520000	216760000	13	13	12	14.2	14.2	13.4	174.91	0	96.147	3185900000	85
A0A0G2JPR0;A0A140TA49			0	0	0	0	0	0	0	0	0	0	0	58824000	0	45	1	0	37.4	1.2	0	192.87	0.001227	3.2619	290640000	7
A0A0G2JQJ7;A0A0G2JS76;A0A0G2JPD5;A0A0G2JMX7;P10636	Microtubule-associated protein tau	MAPT	5761699840	5927399936	4351000064	8448699904	5314899968	5296099840	4525100032	9144899584	7058100224	5160699904	4853799936	8617100288	9857099776	20	20	8	31.1	31.1	12.7	78.954	0	323.31	87738000000	359
A0A0G2JR96;A0A0G2JQT1			0	0	0	0	0	0	0	0	22336000	0	0	0	0	23	1	1	30.3	1.4	1.4	100.3	0.0051732	2.2718	24328000	1
H7C1E5;A0A0G2JQW1;A0A0J9YXQ9;Q53QD4;Q8WVT3;H7C373;H7C0T3	Trafficking protein particle complex subunit 12	TRAPPC12;CGI-87	45108000	0	0	0	0	0	0	0	0	0	0	0	0	2	2	2	12.3	12.3	12.3	23.995	0.00075949	3.6909	139250000	7
A0A0U1RQQ2;A0A0U1RRB8;A0A2R8YEE8;A0A0G2JSE9;C9JTA6;A0A2R8Y5N5;G5E975;Q12824	SWI/SNF-related matrix-associated actin-dependent regulator of chromatin subfamily B member 1	SMARCB1	0	0	0	0	0	0	0	0	0	0	0	31630000	0	1	1	1	16	16	16	9.094	0.0036672	2.4224	369490000	17
A0A0J9YYL3;A0A0J9YVP6;A0A0J9YXJ8;A0A0J9YXX5;Q9UHX1;A0A0J9YVR6;E9PQ56;A0A0J9YWM1;H0YEM1;E9PN18	Poly(U)-binding-splicing factor PUF60	PUF60	463680000	437060000	509409984	540089984	482360000	462030016	429430016	534870016	529390016	571960000	439160000	487209984	505960000	15	15	15	39.6	39.6	39.6	54.626	0	139.72	6582200000	109
A0A0J9YW36;Q9NZ72	Stathmin-3	STMN3	0	0	0	0	0	0	0	0	0	0	0	28271000	0	1	1	1	4.2	4.2	4.2	27.289	0.0058062	2.1803	182460000	4
A0A0J9YW40;Q6IEE7	Transmembrane protein 132E	TMEM132E	30150000	0	0	0	0	0	0	0	0	0	0	0	0	4	4	4	6.1	6.1	6.1	116.15	0.00028777	6.4468	102830000	9
A0A0J9YWE1;A0A0J9YWN0			0	0	0	0	0	0	0	0	0	0	0	0	104500000	10	1	1	63.9	8.8	8.8	21.783	0	8.4733	1283400000	12
V9GYD9;Q5VZZ6;A0A0J9YX66;A0A1B0GU44;E9PC62;A0A1B0GUN8;A0A0J9YXJ0;O95319	CUGBP Elav-like family member 2	CELF2	532400000	593710016	464360000	428129984	456870016	529049984	408000000	419720000	447560000	334950016	468089984	518500000	319169984	9	9	8	22	22	19.8	46.621	0	63.503	6248200000	77
A0A0J9YXF2;A0A0J9YYG4;Q15165;J3QT77;G3XAK4	Serum paraoxonase/arylesterase 2	PON2	2027200000	2161100032	1551100032	1867900032	1379200000	1430099968	2108199936	1529200000	1812499968	1317799936	1824499968	1438400000	1811900032	15	15	15	70.1	70.1	70.1	41.527	0	249.47	23968000000	201
A0A0J9YXN7;Q96Q06	Perilipin-4	PLIN4	0	0	0	0	0	0	0	144050000	0	0	0	0	0	2	2	2	6.5	6.5	6.5	136.02	0.00052029	4.1353	173200000	5
A0A0J9YY99;P0DP03;P01768;P01764	Ig heavy chain V-III region CAM;Ig heavy chain V-III region 23	IGHV3-23	0	0	0	127440000	220240000	0	0	53314000	0	0	113740000	0	0	3	3	2	26.5	26.5	17.1	12.965	0	7.5402	702760000	15
A0A0J9YYF7;Q86T65	Disheveled-associated activator of morphogenesis 2	DAAM2	156170000	157930000	177530000	276140000	136540000	0	162330000	0	293529984	204380000	171190000	208210000	202370000	20	20	16	23.1	23.1	18.5	124.51	0	34.244	2259700000	69
A0A0J9YYJ0;Q8N129	Protein canopy homolog 4	CNPY4	0	0	0	0	0	0	0	0	79149000	0	82833000	75168000	67929000	2	2	2	17.8	17.8	17.8	13.171	0.0018971	2.8233	431330000	12
A0A0R4J2E8;P43243;A8MXP9;D6REM6;D6R991	Matrin-3	MATR3	5809699840	6117700096	4710199808	5131299840	5987700224	5547100160	4590199808	5914399744	5019800064	3955099904	5449500160	4858699776	5305699840	36	36	36	53.2	53.2	53.2	94.622	0	323.31	73935000000	523
A0A0S2Z4R8;A0A140T9T7;Q03518	Antigen peptide transporter 1	TAP1	0	0	0	14317000	0	0	0	0	0	0	0	0	0	1	1	1	4.3	4.3	4.3	34.603	0.002094	2.62	38123000	1
A0A0U1RQI5			109490000	206430000	0	141450000	186960000	172670000	237130000	427649984	303350016	159830000	0	173650000	546889984	23	2	2	60.2	10.1	10.1	57.893	0	151.67	2895300000	35
A0A0U1RQI6;E7ERI8;E7EW49		CLASP2	780230016	834630016	652750016	786739968	809779968	641219968	834750016	929529984	644070016	493820000	781139968	870630016	675500032	40	40	1	40.6	40.6	1.7	142.33	0	319.64	10196000000	205
A0A0U1RQL8			0	0	0	0	0	0	0	0	0	0	23269000	0	0	9	1	1	51.7	7.8	7.8	26.3	0.00053319	4.6804	177720000	5
F8VSC5;A0A0U1RQQ9;Q6P3W7	SCY1-like protein 2	SCYL2	51375000	0	0	0	60367000	66996000	0	34389000	0	0	0	52755000	49655000	3	3	3	5.9	5.9	5.9	77.053	0	7.1456	510030000	25
A0A0U1RQT8;Q8TCZ2	CD99 antigen-like protein 2	CD99L2	233260000	232630000	0	258540000	211310000	216940000	0	0	167710000	116860000	141390000	149700000	0	3	3	3	27.7	27.7	27.7	18.663	0	174.98	2153600000	29
A0A0U1RQV3;Q12805	EGF-containing fibulin-like extracellular matrix protein 1	EFEMP1	0	0	23838000	0	0	0	0	0	0	0	0	0	0	3	3	3	17.1	17.1	17.1	31.646	0	13.603	194340000	5
E7EPU2;A0A0U1RQW6;Q9Y2E4	Disco-interacting protein 2 homolog C	DIP2C	109530000	132710000	115930000	0	102580000	0	108240000	128770000	109100000	0	100180000	100390000	0	12	12	6	10.2	10.2	4.5	168.64	0	16.708	1101300000	40
A0A0U1RR39;A0A1B0GW38;A0A0U1RQX8;P22681	E3 ubiquitin-protein ligase CBL	CBL	0	0	0	0	0	0	0	0	40769000	0	0	0	0	3	3	3	4.8	4.8	4.8	95.096	0.0012118	3.0765	121060000	4
A0A0U1RR30;A0A0U1RRM1;Q8WXI9;Q86YP4	Transcriptional repressor p66-beta;Transcriptional repressor p66-alpha	GATAD2B;GATAD2A	0	0	0	0	0	0	0	0	0	0	0	23320000	0	1	1	1	4.2	4.2	4.2	28.673	0.00051948	4.1106	99926000	4
A0A0U1RRB6;Q9Y2D4;J3QT38	Exocyst complex component 6B	EXOC6B	96190000	99380000	0	0	118660000	0	89916000	175630000	139520000	0	165880000	0	120500000	14	14	14	23.9	23.9	23.9	94.685	0	28.309	1215000000	38
A0A0U1RRJ0;A0A0U1RQC5;Q9Y4C0;A0A0A0MR89	Neurexin-3	NRXN3	651249984	645289984	658950016	634430016	643520000	471580000	581840000	286800000	269950016	349710016	473840000	394169984	291310016	24	24	18	19.4	19.4	15.5	173.66	0	64.221	6714900000	167
F6XEV2;A0A0U1RRK1;A0A286YF11;Q9BPX6;E9PQV6	Calcium uptake protein 1, mitochondrial	MICU1	0	0	0	0	0	0	92988000	0	0	0	0	56885000	0	3	3	3	6.9	6.9	6.9	54.578	0.00027732	5.5237	296680000	7
A0A0U1RRL8;Q8TB22	Spermatogenesis-associated protein 20	SPATA20	191120000	117660000	126650000	0	151680000	101960000	145700000	0	163380000	0	147550000	100410000	0	10	10	10	16.2	16.2	16.2	88.051	0	11.807	1428900000	42
A0A0U1RRM4;P26599;A6NLN1;K7EKJ7	Polypyrimidine tract-binding protein 1	PTBP1	560329984	507110016	637980032	668609984	594659968	629619968	350800000	776190016	664089984	536540000	655459968	553880000	413620000	13	13	13	35.2	35.2	35.2	62.463	0	274.93	8014400000	132
J3KQ99;A0A140T9Y9;A0A140T9U4;A0A140T9R4;A0A140T9H1;A0A140T9F8;A0A140T9D6;A0A140T914;A0A140T9Y8;A0A140T9U1;A0A140T9J4;A0A140T980;A0A140T909;A0A140T900;A0A140T8Z9;P20036;H0Y6F8;A0A140T9G9;A0A140T9G7;A0A140T9A6;A0A140T992;A0A140T977;A0A140T968;A0A140T961	HLA class II histocompatibility antigen, DP alpha 1 chain	HLA-DPA1	0	0	192700000	0	0	0	0	0	0	0	0	66153000	0	3	3	2	22	22	16.3	24.059	0	14.227	460530000	11
A0A140T955;A0A140T933;A0A1W2PRT9;A0A140T9I0;A0A140T9X5;A0A140T913;P01892;A0A1W2PPQ2	HLA class I histocompatibility antigen, A-2 alpha chain	HLA-A	0	0	0	0	0	0	0	0	0	0	54728000	0	0	15	1	0	55.5	5.7	0	34.288	0	51.119	308960000	11
O19617;A0A140T921;A0A140T9H5;A0A140T9U8;A2AEA2;P10321;A0A140TA05;A0A1W2PRU9;A0A140T9L3;A0A140T9E1;A0A140T942	HLA class I histocompatibility antigen, Cw-7 alpha chain	HLA-C	0	0	108310000	145470000	161850000	0	96588000	65628000	150200000	0	121080000	121870000	0	12	3	1	43.2	13.7	4.4	40.71	0	219.52	1249400000	35
H7C5D3;H7C4U4;Q0P5T2;A0A140T9G8;Q5SQH8;H7C5B5	Uncharacterized protein C6orf136	C6orf136	0	0	0	0	0	0	0	0	0	0	0	0	24335000	2	2	2	24.2	24.2	24.2	11.504	0.00075969	3.6941	325020000	13
A0A140TA29;A0A0G2JL54;F5GXS0		C4B	419150016	918620032	550440000	1059800000	1730400000	540179968	1087699968	1068700032	1158899968	1472700032	2684999936	1397500032	1023000000	45	45	0	39.5	39.5	0	187.66	0	323.31	16133000000	261
A0A140TA32;A0A140TA44			0	0	0	0	0	0	0	0	0	0	0	0	89572000	45	1	0	38.6	0.7	0	187.76	0.0012204	3.1958	662940000	13
A0A140TA86;Q5XKP0;K7EIR2;A0A140TA84	Protein QIL1	QIL1;C19orf70	111630000	248300000	168640000	0	175870000	137360000	183390000	322160000	0	90258000	404400000	498920000	414889984	2	2	2	37.1	37.1	37.1	15.436	0	110.3	3158500000	43
A0A182DWF2;D3YTF8;A0A182DWF3;Q9NNW7;A0A096LPK7;A0A096LPD9;E7EWK1	Thioredoxin reductase 2, mitochondrial	TXNRD2	267430000	168950000	351000000	205180000	146120000	189400000	227470000	0	0	194420000	0	0	0	12	11	11	40.7	37.7	37.7	53.567	0	66.863	2116100000	48
A0A1B0GTB6;H0Y695;B3KTU4;A0A1B0GTA8;A0A1B0GTM2;A0A1B0GUH1;P48728;A0A1B0GV07;A0A1B0GWC4;A0A1B0GTV8;A0A1B0GVP5	Aminomethyltransferase;Aminomethyltransferase, mitochondrial	AMT	0	0	0	0	0	0	0	0	0	0	21694000	0	0	2	2	2	14.3	14.3	14.3	34.495	0.00028353	5.9907	61226000	3
A0A1B0GWF9;A0A1B0GUK4;A0A1B0GVB2;A0A1B0GTS4;A0A1B0GU53;E7EN11;A0A1B0GTF6;A0A1B0GTA9;A0A1B0GTN8;H0Y476;A0A1C7CYX2;A0A1B0GTX2;O00305;A0A1B0GXG0;A0A1B0GTP5;A0A1B0GVU5;A0A1B0GUI8;A0A1B0GVF0;A0A1B0GTX8;A0A1B0GTK1	Voltage-dependent L-type calcium channel subunit beta-4	CACNB4	93757000	0	92412000	0	0	0	0	0	0	0	69554000	50040000	0	7	7	4	23.2	23.2	14.7	38.21	0	8.2144	507410000	20
B7Z1I9;A0A1B0GTB0;A0A1B0GTU8;A0A1B0GUT7;A0A1B0GVW0;O75787;A0A1B0GWD6;A0A1B0GVI9;A0A1B0GVC7;A0A1B0GWJ8;H7C3E1;B7Z413;A0A1B0GVB9;A0A1C7CYW4	Renin receptor	ATP6AP2	0	0	0	0	0	0	0	0	0	0	0	0	155530000	3	3	3	12.9	12.9	12.9	30.334	0.00053305	4.6608	764580000	16
A0A1B0GTC3;A0A1B0GVH5;Q9C0B1;A0A1B0GUC3;A0A1B0GV98;A0A1B0GTC5;A0A1B0GU26;A0A1B0GTY1	Alpha-ketoglutarate-dependent dioxygenase FTO	FTO	449220000	521080000	374729984	249810000	505929984	220610000	229980000	304089984	283609984	246310000	577030016	388180000	257540000	14	14	14	34.3	34.3	34.3	61.313	0	170.82	4886500000	119
A0A1B0GTF3			0	0	0	0	0	0	0	0	30590000	0	0	0	0	31	1	1	46	2.7	2.7	77.018	0	43.909	165770000	8
A0A1B0GTG2;A0A1B0GW77;P49419;A0A1B0GUA1;A0A1B0GW82;A0A1B0GTY9;A0A1B0GTJ4;A0A1B0GV49;A0A0J9YWF7;A0A1B0GUY0	Alpha-aminoadipic semialdehyde dehydrogenase	ALDH7A1	16945000448	13715000320	20401000448	13857999872	17742000128	18830999552	19869999104	17753999360	20152999936	16908000256	17013000192	18979999744	18482999296	30	30	30	66.2	66.2	66.2	58.139	0	323.31	255210000000	819
A0A1B0GTI6;A0A1B0GV63;A0A1B0GWJ2;A0A1B0GTJ8;A0A1B0GVK1;H0Y7H8;A0A3F2YNW7;Q8NFD5	AT-rich interactive domain-containing protein 1B	ARID1B	0	0	0	0	0	8992500	0	0	0	0	0	0	0	1	1	1	4.2	4.2	4.2	35.218	0.0041181	2.407	29081000	4
A0A1B0GWJ0;A0A1B0GTJ7;P30566;A0A0A6YY92;A0A096LNY6;A0A1B0GTG9;A0A1B0GWF8;A0A096LNY5	Adenylosuccinate lyase	ADSL	0	103740000	114160000	122830000	142410000	0	122280000	160580000	145350000	86977000	115070000	108580000	140360000	8	8	8	28.1	28.1	28.1	54.465	0	22.024	1475800000	36
A0A1B0GTK8;Q5GJ75	Tumor necrosis factor alpha-induced protein 8-like protein 3	TNFAIP8L3	43302000	0	0	0	0	0	0	0	0	0	0	0	0	3	3	3	16.7	16.7	16.7	23.36	0.00028653	6.305	147190000	18
A0A1B0GTL5;Q9BXF6	Rab11 family-interacting protein 5	RAB11FIP5	149110000	0	0	0	125220000	172960000	0	111670000	0	0	0	0	79320000	6	6	6	8.8	8.8	8.8	138.41	0	17.179	957640000	22
E7EMM4;A0A1B0GW68;A0A1B0GUA4;A0A1B0GTM3;A0A1B0GTZ5;Q13510;A0A1B0GUH5;A0A1B0GUE3;A0A1B0GUW4;A0A1B0GTP7;A0A1B0GUG1;A0A1B0GV06;A0A1B0GUB3;A0A1B0GVG2	Acid ceramidase;Acid ceramidase subunit alpha;Acid ceramidase subunit beta	ASAH1	1301699968	1424999936	1199600000	902129984	1190200064	1315299968	1321500032	1045299968	1231699968	1305900032	1428800000	1407600000	1457600000	16	16	16	47.8	47.8	47.8	41.796	0	155.49	17330000000	137
A0A1B0GTP9			681040000	0	0	0	0	0	0	0	0	0	0	0	0	46	2	2	75.6	4.4	4.4	67.327	0.00051787	4.0564	4728500000	10
A0A1B0GTU4;P49023;F5GZ78;A0A1B0GU60	Paxillin	PXN	65689000	61246000	0	82966000	0	69929000	65118000	72689000	109810000	70421000	0	0	0	6	6	6	7.6	7.6	7.6	115.9	0	27.209	696820000	39
A0A3B3ITE1;A0A1B0GTW1;A0A2R8YDH4;Q9UDY2;A0A3B3IRI3;A0A3B3ISZ5;A0A3B3IU51;A0A3B3ISF1;A0A3B3IRV6;A0A3B3IT83;A0A3B3IS03	Tight junction protein ZO-2	TJP2	1738800000	1834499968	1322000000	2278099968	1989200000	1567299968	2113299968	2173799936	2599000064	2168699904	1696400000	1776199936	2576999936	42	42	42	44.5	44.5	44.5	134.21	0	323.31	26510000000	383
A0A1B0GTW6			0	0	0	0	0	0	0	0	0	0	153110000	0	0	20	2	2	20.9	2.7	2.7	114.93	0.0095902	1.9592	1379700000	10
A0A1B0GW37;A0A1B0GU97;S4R308;K7ESG9;K7EKH0;U3KPY9;K7EJB0;S4R3K4;A0A087WXP2;Q5W0Y9;B1AKN6;C9JWJ8;U3KQE8;A0A1B0GWJ4;A0A0A0MRX8;K7EN08;B1AKN7;A0A1B0GWI9;Q5VW27;B1AKN5;A0A286YEX4;B1AKN8;Q5VW30;A0A2R8Y7V8;Q5VW26;O00712;Q14938;P08651;Q12857	Nuclear factor 1;Nuclear factor 1 B-type;Nuclear factor 1 X-type;Nuclear factor 1 C-type;Nuclear factor 1 A-type	NFIA;NFIX;NFIB;NFIC	0	0	0	0	0	0	0	0	0	0	12966000	0	0	2	2	2	6.6	6.6	6.6	46.404	0.0012207	3.2015	43683000	5
A0A1B0GUA3;Q96EK5	KIF1-binding protein	KIAA1279	209230000	239480000	250960000	279920000	278220000	296300000	324440000	268290000	293609984	307680000	225310000	266950000	310980000	17	17	17	40.7	40.7	40.7	74.783	0	68.939	3597500000	82
H3BUF8;A0A1B0GUB1;F6TI76;O95086;Q2TA70;B4DFF3	Battenin	CLN3	0	0	0	0	0	0	0	0	0	0	0	37218000	0	2	2	2	22.6	22.6	22.6	5.9848	0.0051849	2.2859	297240000	8
A0A1B0GUI1;Q6GYQ0	Ral GTPase-activating protein subunit alpha-1	RALGAPA1	0	0	46800000	0	0	0	0	0	51001000	0	0	0	0	6	6	6	3.1	3.1	3.1	280.41	0	8.4772	306230000	27
Q5VTI5;A0A1B0GUN5;Q9Y2H5	Pleckstrin homology domain-containing family A member 6	PLEKHA6	0	0	0	35522000	32610000	0	0	0	0	0	0	44485000	0	6	6	6	6.6	6.6	6.6	119.29	0.00029308	6.9428	441440000	20
A0A1B0GUU9;P01871	Ig mu chain C region	IGHM	275470016	86652000	1224600064	472840000	2219500032	146970000	186430000	111430000	304600000	299510016	277910016	300249984	377300000	15	15	15	41.6	41.6	41.6	51.923	0	157.34	6739700000	99
A0A1B0GUZ7;Q14156	Protein EFR3 homolog A	EFR3A	0	0	0	0	0	0	0	17539000	24042000	0	35035000	0	0	4	4	4	8	8	8	96.13	0	8.1383	189620000	16
A0A1B0GV05;Q684P5	Rap1 GTPase-activating protein 2	RAP1GAP2	345720000	302420000	231050000	298889984	234250000	307880000	260830000	289889984	205960000	259620000	253010000	250510000	181960000	12	11	11	20.9	20	20	85.181	0	128.33	3504500000	69
A0A1B0GV38;P14867;E5RK60;A0A0U1RRB2	Gamma-aminobutyric acid receptor subunit alpha-1	GABRA1	0	0	0	0	0	0	0	0	0	0	0	0	64892000	2	2	2	5.1	5.1	5.1	53.383	0.0053812	2.2429	342620000	9
A0A1B0GV47;Q7Z4S6	Kinesin-like protein KIF21A	KIF21A	761480000	876099968	885779968	909280000	759609984	765340032	950760000	637920000	618649984	814659968	792849984	940960000	658150016	29	29	26	28.1	28.1	26.1	184.71	0	323.31	10746000000	227
A0A1B0GV68;M0QYB0		FARP1	0	0	0	0	0	0	0	29474000	0	0	0	0	0	20	2	2	34.3	3.7	3.7	88.1	0.00052743	4.4281	43785000	2
A0A1B0GW44;A0A1B0GVD5;A0A1B0GWE8;P07339;A0A1B0GVP3;A0A1B0GV23;A0A1B0GU92;A0A1B0GU03;H7C469;C9JH19	Cathepsin D;Cathepsin D light chain;Cathepsin D heavy chain	CTSD	8212599808	9602400256	8538599936	7786800128	9006600192	10142000128	8323999744	6513900032	6444100096	7499800064	8137399808	7598799872	8382700032	16	16	16	46.2	46.2	46.2	43.688	0	283.15	117370000000	483
A0A1B0GVP4			0	0	0	0	0	0	0	0	0	0	350860000	242120000	194330000	3	3	3	2.6	2.6	2.6	211.48	0.00098765	3.3561	1143800000	15
A0A1B0GWI0;A0A1B0GVV8;A0A1B0GW50;A0JP08;O60315;A0A1X7SC99;E7EUW9;A0A1B0GV02;H0YMD3;H0YMN2;H0YND9;U3KQ51;E7ESP8;P37275	Zinc finger E-box-binding homeobox 2;Zinc finger E-box-binding homeobox 1	ZEB2;ZEB1	0	0	0	0	84097000	0	0	0	0	0	0	0	0	4	4	4	5.5	5.5	5.5	107	0.0020964	2.6324	115250000	5
K7ERN1;A0A1B0GVY1;Q96PU5	E3 ubiquitin-protein ligase NEDD4-like	NEDD4L	0	0	0	0	0	0	0	33926000	0	0	26133000	34794000	0	6	6	4	11.6	11.6	8.1	74.193	0.00029542	7.1256	256590000	16
A0A1B0GWA2;A0A2R8YEL0;O00116	Alkyldihydroxyacetonephosphate synthase, peroxisomal	AGPS	73467000	86830000	67464000	66119000	0	63194000	0	0	70677000	71290000	0	59565000	69935000	7	7	7	17.9	17.9	17.9	60.807	0	14.199	700600000	23
H3BLV5;A0A1B0GWD1;A8K340;O43602	Neuronal migration protein doublecortin	DCX	110570000	81842000	85539000	119590000	102910000	170660000	69272000	134770000	93147000	0	81025000	95354000	0	8	4	4	23.6	13.6	13.6	40.044	0	32.739	1248300000	31
A0A1B0GWK2;Q674X7	Kazrin	KAZN	0	0	0	40879000	33255000	0	0	0	0	0	0	0	0	4	4	4	6.8	6.8	6.8	96.079	0	15.085	281790000	20
A0A1C7CYX9;Q16555	Dihydropyrimidinase-related protein 2	DPYSL2	170809999360	168289992704	169150005248	166489997312	148029997056	161739997184	174369996800	146489999360	137580003328	198030000128	141939998720	143550005248	161349992448	43	43	38	74	74	67.9	73.502	0	323.31	2263400000000	2777
A0A1C7CYZ0;Q12979;A0A0G2JQ41;B7Z683	Active breakpoint cluster region-related protein	ABR	1386099968	1285900032	1309400064	1314800000	1264099968	1258499968	1399000064	1205200000	1053699968	1436000000	1086300032	1233900032	1075000064	27	27	25	45.1	45.1	44	98.918	0	228.48	16808000000	246
A0A1W2PSC5;A0A1W2PPK4;A0A1W2PQY1;A0A1W2PQ52;A0A1W2PQN1;F6W983;A0A1W2PPQ7;A0A1W2PRZ8;A0A1W2PP53;A0A1W2PP57;A0A1W2PPC3;A0A1W2PPS0;A0A1W2PPR6;A0A1W2PNP0;Q969N2;A0A1W2PP13	GPI transamidase component PIG-T	PIGT	0	0	0	0	0	0	0	0	35551000	0	40845000	0	0	2	2	2	22.7	22.7	22.7	14.332	0.00028265	5.9306	150560000	8
A0A1W2PNV4;E9PF58		ARPC1A	2119299968	2534500096	2180900096	2373799936	2196400128	2151000064	2434899968	2269799936	2110400000	2349799936	2098400000	2217200128	2261299968	24	24	0	45.9	45.9	0	75.872	0	323.31	29959000000	244
A0A1W2PNW1;P42226	Signal transducer and activator of transcription 6	STAT6	0	0	0	0	0	0	0	0	0	0	0	0	19701000	5	5	5	7.4	7.4	7.4	76.077	0.00026918	4.9034	55602000	10
A0A1W2PNX8;Q9H3U1	Protein unc-45 homolog A	UNC45A	0	0	0	0	0	0	0	0	43930000	0	58695000	0	0	2	2	2	3.2	3.2	3.2	118.39	0	39.475	219990000	7
A0A1W2PNY5;A0A1W2PQZ6;A0A1W2PRF0;A0A1W2PRJ0;A0A1W2PPP6;A0A1X7SBS0;A0A1W2PS93;A0A1W2PR08;A0A1W2PRF5;G5E9D4;Q96EB1;E9PPJ9;A0A1W2PNW2;A0A1W2PQA7;A0A1W2PP47	Elongator complex protein 4	ELP4	31346000	32516000	0	0	0	0	89632000	37556000	0	0	0	0	39407000	2	2	2	9.6	9.6	9.6	42.555	0	13.453	317870000	16
C9JTB6;A0A1W2PQL2;A0A1W2PQ65;A0A1W2PS30;A0A1X7SBW1;A0A1W2PP71;Q96MP8	BTB/POZ domain-containing protein KCTD7	KCTD7	0	0	0	0	0	0	0	0	0	0	0	0	18177000	1	1	1	7.3	7.3	7.3	19.803	0.00028498	6.0945	168140000	13
A0A1W2PPH1;A0A1W2PQH3;P23368;A0A1W2PQT3;A0A1W2PQY8;A0A1W2PQ37;A0A1W2PQF8;A0A1W2PR68	NAD-dependent malic enzyme, mitochondrial	ME2	803520000	965990016	874000000	1041600000	841030016	1254499968	966950016	831480000	102370000	873369984	1012000000	858080000	1105600000	18	17	17	50.2	48.5	48.5	61.221	0	154.95	11948000000	152
A0A1W2PPJ5;Q96SW2;J3QT87	Protein cereblon	CRBN	0	112300000	0	116850000	79922000	115470000	109900000	0	89939000	0	111080000	90111000	102570000	6	6	6	17.1	17.1	17.1	55.781	0	15.642	1125300000	39
A0A1W2PPJ9;Q7RTN6;J3QS66;A0A1W2PQE8;A0A1W2PS04;A0A1W2PR00;A0A1W2PP78;A0A1W2PNV7;A0A1W2PPG2;A0A1W2PPM8;A0A1W2PQF1;J3QKR7;A0A1W2PQ20;A0A1W2PNV1;A0A1W2PPI1;J3KSK5;J3KSA2;A0A1W2PR44;A0A1W2PRW9;A0A1W2PR65;Q86YC8;J3QQS3;A0A1W2PRQ6;A0A1W2PQ00	STE20-related kinase adapter protein alpha	STRADA	0	0	0	0	39819000	0	0	0	0	0	0	0	0	4	4	4	13.9	13.9	13.9	44.928	0.00098644	3.3419	137240000	6
A0A1W2PPR8;P01889;F6U0H7	HLA class I histocompatibility antigen, B-7 alpha chain	HLA-B	0	0	0	0	0	0	0	0	0	0	0	0	75390000	12	1	0	34.2	3.3	0	40.687	0.00053234	4.6052	203510000	4
C9J4M6;A0A1W2PPT5;C9J2Y9;P30876	DNA-directed RNA polymerase;DNA-directed RNA polymerase II subunit RPB2	POLR2B	0	0	0	0	0	0	0	0	0	0	41925000	44876000	0	4	4	4	3.8	3.8	3.8	121.37	0.00029011	6.7481	325010000	25
A0A1W2PRL9;A0A1W2PPZ5;P23193	Transcription elongation factor A protein 1	TCEA1	0	0	0	0	0	0	0	153100000	0	0	0	0	0	7	7	7	34.6	34.6	34.6	31.63	0	18.086	431730000	17
A0A1W2PQ86;A0A1W2PQ11;Q02246;A0A1W2PQJ4;A0A1B0GTL7	Contactin-2	CNTN2	13802000	0	0	0	0	0	0	0	0	0	0	0	0	3	3	3	3.7	3.7	3.7	83.141	0.0025463	2.5529	27856000	5
A0A1X7SBZ2;A0A1W2PQ51;Q92841	Probable ATP-dependent RNA helicase DDX17	DDX17	2460000000	2500999936	2302700032	2117699968	2030300032	2331099904	1857500032	1728000000	1770099968	2050700032	2106400000	1995699968	1583100032	29	29	20	43.3	43.3	31.6	80.253	0	281.04	28222000000	273
A0A1W2PQ75;O15488	Glycogenin-2	GYG2	0	0	96451000	0	0	0	0	0	0	0	123330000	0	0	5	5	3	20.5	20.5	14.9	47.558	0	9.6868	1066900000	17
C9JC71;A0A1W2PQB1;H0Y755;M9MML0;P08637	Low affinity immunoglobulin gamma Fc region receptor III-A	FCGR3A	0	0	0	0	0	0	0	0	0	0	24269000	0	0	1	1	1	10.5	10.5	10.5	11.823	0.0012243	3.2479	105690000	4
A0A1W2PQS6			195240000	202810000	203630000	254770000	241900000	236180000	0	228910000	0	158060000	209930000	0	239930000	6	2	0	24.4	8.2	0	33.14	0.00028547	6.1409	2848000000	44
A0A1W2PQV2;H3BUH9;P23434	Glycine cleavage system H protein, mitochondrial	GCSH	471260000	424550016	427310016	245770000	345609984	387150016	285580000	247520000	243110000	0	376089984	0	307110016	2	2	2	30	30	30	10.999	0	75.232	4433100000	30
A0A1W2PQV4;H3BQL2;A0A1W2PRN1;A0A1B0GVY7;D6RF30;P0CJ92	Golgin subfamily A member 8K;Golgin subfamily A member 8H	GOLGA8T;GOLGA8K;GOLGA8H	0	0	0	0	0	0	0	0	87938000	0	0	0	0	2	2	2	3.4	3.4	3.4	68.57	0.0018908	2.794	174140000	3
F5GYH1;A0A1W2PRM0;A0A1W2PRL5;A0A1W2PR09;Q8NC96;A0A1W2PR27;A0A1W2PPF5;A0A1W2PRQ7;A0A1W2PNT6	Adaptin ear-binding coat-associated protein 1	NECAP1	329740000	257900000	248110000	257310000	263030000	285340000	269129984	0	0	0	0	232890000	175270000	6	6	6	39.6	39.6	39.6	25.948	0	109.45	2682100000	47
A0A1W2PRJ5;A0A1W2PR28;Q5JU85;A0A1W2PPE7;A0A1W2PQ34;A0A1W2PPU7	IQ motif and SEC7 domain-containing protein 2	IQSEC2	0	0	0	0	0	0	0	45083000	0	0	0	0	0	6	3	3	13.6	8.1	8.1	59.663	0	7.4	289370000	9
H0YBI6;A0A1W2PR67;H0YBQ0;Q86VQ6	Thioredoxin reductase 3	TXNRD3	0	0	0	0	0	0	0	0	16168000	0	0	0	0	1	1	1	3.5	3.5	3.5	66.536	0.00027122	5.1109	17610000	1
A0A1W2PRW4;P53816	HRAS-like suppressor 3	PLA2G16	0	151360000	0	0	0	0	0	0	0	0	0	0	0	2	2	2	16.8	16.8	16.8	17.787	0.00029197	6.8247	382840000	14
A8MYT4;A0A1W2PS05;Q8NEB9	Phosphatidylinositol 3-kinase;Phosphatidylinositol 3-kinase catalytic subunit type 3	PIK3C3	96631000	66847000	58377000	60657000	0	0	65661000	0	0	0	0	51257000	55339000	6	6	6	9	9	9	94.399	0	10.869	580130000	26
Q5SRN7;A0A1W2PS24;Q5SRN5;P04439	HLA class I histocompatibility antigen, A-3 alpha chain	HLA-A	0	0	0	0	134280000	0	0	0	0	0	0	0	0	15	2	1	59.5	6.7	4	34.211	0.0032288	2.5053	213150000	7
A0A1W2PS43;Q14108;A0A1W2PPX5;A0A1W2PQR6;A0A1W2PQB7;A0A1W2PRS1;A0A1W2PRF6;A0A1W2PPU6	Lysosome membrane protein 2	SCARB2	221820000	238220000	254550000	250450000	249250000	196660000	269480000	175160000	284510016	236200000	264300000	155180000	230620000	8	8	8	21.5	21.5	21.5	53.891	0	22.666	3083900000	61
A0A1X7SBR3			0	0	0	0	0	0	0	0	0	44561000	0	0	0	66	1	1	83.9	3.6	3.6	54.244	0.0034514	2.4712	154990000	4
A0A1X7SBT7;O95502	Neuronal pentraxin receptor	NPTXR	99775000	0	0	92140000	102850000	81113000	99468000	0	0	0	78507000	97210000	136140000	6	6	6	20.6	20.6	20.6	52.828	0	14.713	992330000	33
D6RJF9;A0A286YFI3;A0A286YFC0;A8MWW6;A0A286YFJ6;A0A286YFJ4;A0A286YEN5;A0A286YF85;A0A286YFA6;A0A286YF62;A0A286YEW9;P53779;A0A286YFN2;A0A286YFB6;A0A286YFM6;A0A286YEQ0;A0A286YEQ7;A0A286YEX7;A0A1P0B7D2;A0A286YFD7;A0A286YES9;A0A286YF97;A0A286YF02;A0A286YEV3;A0A286YES0;A0A286YF35;A0A286YF19;A0A286YF83;A0A286YEY0;A0A286YEV8;Q499Y8;P45983;A0A286YFE2;D6RCB1	Mitogen-activated protein kinase 10;Mitogen-activated protein kinase 8	MAPK10;MAPK8	320380000	275110016	189440000	296000000	228360000	291000000	253770000	201360000	180730000	166860000	262480000	264210000	225910000	13	13	8	39.1	39.1	23.7	44.097	0	22.681	3231900000	65
A0A286YES1;P01860	Ig gamma-3 chain C region	IGHG3	280670016	614089984	541939968	1223699968	3469600000	547849984	648289984	249950000	461430016	702910016	533700000	520260000	610310016	15	8	6	44.8	31.8	25.6	49.021	0	89.83	10946000000	83
H0YN11;A0A286YET3;Q6ZNW5	GDP-D-glucose phosphorylase 1	GDPGP1	42206000	45335000	0	46554000	0	38177000	0	0	0	0	0	36741000	0	2	2	2	11.2	11.2	11.2	23.9	0.00052645	4.4028	357560000	18
A0A286YEX2;Q5T7P8	Synaptotagmin-6	SYT6	165870000	202300000	103110000	128970000	0	128220000	111540000	110130000	151050000	76652000	118750000	164770000	0	9	9	9	20.1	20.1	20.1	59.198	0	20.772	1585300000	48
A0A286YEY1;P01876	Ig alpha-1 chain C region	IGHA1	469230016	1375000064	1703600000	2220499968	4345200128	1161799936	1601200000	2201400064	1448800000	3046099968	4212699904	3000100096	3161999872	11	11	4	40.7	40.7	14.8	42.848	0	132.02	31547000000	167
A0A286YEY4;P01859	Ig gamma-2 chain C region	IGHG2	563950016	633459968	1198300032	1642000000	1669500032	555190016	605939968	745569984	1107699968	961139968	2867399936	748830016	1405200000	11	5	4	37.7	20.5	17	43.805	0	49.542	15720000000	72
A0A286YEY5;P01877	Ig alpha-2 chain C region	IGHA2	0	0	0	0	0	0	0	0	0	0	39105000	0	0	7	1	1	25.8	5.4	5.4	42.333	0.0032318	2.5138	118280000	5
A0A286YF22;O43175;A0A2C9F2M7;A0A286YFA2;A0A286YFL2;A0A286YFM8	D-3-phosphoglycerate dehydrogenase	PHGDH	17408999424	20188999680	22705999872	18665000960	20992000000	25272999936	20662999040	20971999232	23431999488	21397000192	18457999360	22287998976	23569000448	31	31	31	67.5	67.5	67.5	55.938	0	323.31	288360000000	874
A0A286YF37;Q9UK22	F-box only protein 2	FBXO2	7551000064	8919100416	7504500224	9723599872	9996600320	14449000448	11123999744	11843999744	9960399872	12056999936	8156000256	7039000064	12410000384	15	15	15	63.1	63.1	63.1	30.299	0	323.31	131990000000	425
A0A2C9F2P4;A0A286YFF7;P50897;Q5T0S4;A0A286YFE3;A0A286YFL8	Palmitoyl-protein thioesterase 1	PPT1	1972000000	2063800064	1770499968	1899699968	2184100096	2164600064	1926099968	1453500032	1511800064	1807399936	1730400000	2547599872	1972700032	10	10	10	44.9	44.9	44.9	34.136	0	301.88	26688000000	179
A0A286YFF8;Q7Z3U7	Protein MON2 homolog	MON2	72995000	69648000	70204000	75233000	88021000	78107000	64750000	87406000	77275000	74474000	64402000	69120000	90745000	10	10	10	8.1	8.1	8.1	190.48	0	16.475	1048800000	43
A0A286YFJ8;P01861	Ig gamma-4 chain C region	IGHG4	0	0	0	0	0	0	0	0	0	0	300430016	0	0	9	2	2	31.3	10.1	10.1	43.831	0.0005164	4.0225	594090000	6
A0A2Q2T6B6;G9CGD6;Q8WWN9;E5RGN6;E5RGB6;E5RJQ7	Interactor protein for cytohesin exchange factors 1	CNKSR3;IPCEF1	0	38729000	0	0	0	0	0	0	0	0	0	0	0	2	2	2	6.6	6.6	6.6	45.844	0.0018863	2.7763	42345000	3
A0A2Q2TH77;Q08379;A0A1W2PQY5	Golgin subfamily A member 2	GOLGA2	0	0	0	0	0	51563000	61058000	0	0	0	0	0	51230000	4	4	4	4.8	4.8	4.8	111.66	0	11.081	311820000	24
A0A2Q2TTZ9;P01594;P01593	Ig kappa chain V-I region AU;Ig kappa chain V-I region AG		0	232150000	0	0	0	0	0	0	0	0	0	0	0	2	2	2	31.5	31.5	31.5	11.842	0	54.475	850460000	17
A0A2Q3DQE3;Q13555;H0Y6G2	Calcium/calmodulin-dependent protein kinase type II subunit gamma	CAMK2G	3249299968	3378200064	2667300096	3404199936	2538099968	2857499904	2989199872	2489799936	2939399936	3062500096	2509900032	3017799936	2599600128	25	14	2	63.1	39.6	7.2	62.164	0	323.31	39377000000	172
A0A2R8Y6I1;A0A2R8Y3N3;A0A2R8Y5P7;P49590;D6RB22;B4DQ67;D6RJE6	Probable histidine--tRNA ligase, mitochondrial	HARS2	0	0	54489000	0	0	0	47333000	0	0	0	0	0	0	13	7	7	28.4	15.1	15.1	49.246	0.00029403	6.9962	1214000000	17
A0A2R8Y620;A0A2R8Y7U2;A0A2R8Y600;A0A2R8Y455;Q86VX2	COMM domain-containing protein 7	COMMD7	49462000	0	0	0	0	0	0	0	0	0	0	0	0	3	3	3	19.8	19.8	19.8	20.151	0.00050865	3.76	283550000	9
A6NNI4;A0A2R8Y478;G8JLH6;P21926	Tetraspanin;CD9 antigen	CD9	1939699968	2248100096	2062499968	1634400000	2317400064	2526599936	2384999936	2555200000	2683800064	2660499968	2004600064	1661100032	2308800000	5	5	5	29.6	29.6	29.6	17.764	0	278.86	29695000000	101
A0A2R8Y5E4;A0A2R8YFK2;A0A2R8Y6M6;A0A2R8Y4C2;A0A2R8YFS8;A0A2R8Y8C4;A0A2R8Y5C9;A0A2R8Y596;P56945	Breast cancer anti-estrogen resistance protein 1	BCAR1	0	0	0	0	0	0	0	0	0	0	0	0	25514000	5	5	5	9.1	9.1	9.1	77.76	0.00029472	7.0641	105510000	9
A0A2R8Y4D7;Q96PE2	Rho guanine nucleotide exchange factor 17	ARHGEF17	73000000	0	0	0	74543000	0	66141000	0	73596000	0	73553000	63896000	0	6	6	6	8.6	8.6	8.6	114.17	0	37.046	750910000	27
A0A2R8Y4H2;Q9UH03;B1AHR1	Neuronal-specific septin-3	2003-09-01	5861899776	5574700032	5797100032	5520699904	4962299904	4941300224	5466699776	4269299968	5183099904	3882099968	4616800256	5147500032	5037499904	21	21	13	29	29	16.1	92.367	0	323.31	68535000000	272
A0A2R8Y5N9;A0A2R8YFW8;A0A2R8YCL5;A0A2R8Y4I8;A0A2U3TZR0;Q9UBP0;A0A2R8Y7K2;A0A2R8Y481;A0A2R8YGN6	Spastin	SPAST	25334000	0	0	0	0	0	0	0	0	0	0	0	0	3	3	3	16	16	16	40.166	0.00051269	3.8836	58187000	3
A0A2R8Y6N2;A0A2R8YCY0;A0A2R8Y5T6;A0A2R8Y4J9;O95452	Gap junction beta-6 protein	GJB6	0	0	0	0	0	0	0	0	0	0	0	0	22791000	1	1	1	33.3	33.3	33.3	5.059	0.0045517	2.3665	153730000	5
E9PGF5;E9PF55;A0A2R8Y4T1;Q9HBL0;A0A087WWW7;H0Y4U1	Tensin-1	TNS1	199340000	237590000	175770000	228970000	308529984	217460000	221800000	280440000	282140000	0	268300000	197530000	232320000	17	17	16	15.8	15.8	15	183.22	0	43.679	3058200000	63
A0A2R8Y765;J3QKS7;A0A2R8Y7U4;A0A2U3TZQ7;A0A2R8Y7I9;A0A2R8Y4T4;A0A2R8Y855;B4DGM3;Q969G3;K7EMQ8;A0A2R8YES3;H7C048;J3QR61	SWI/SNF-related matrix-associated actin-dependent regulator of chromatin subfamily E member 1	SMARCE1	0	93070000	0	0	0	0	0	0	0	0	0	0	0	5	4	4	19.9	17.3	17.3	32.319	0.00098985	3.395	527800000	8
A0A2R8Y4W2;A0A2R8YE63;Q12929	Epidermal growth factor receptor kinase substrate 8	EPS8	0	0	0	0	0	0	0	88929000	73620000	0	0	0	72149000	3	3	3	7.2	7.2	7.2	92.75	0.00052604	4.3909	379320000	10
A0A2R8Y804;A0A2R8Y543;A0A2R8YCH5;A0A2R8Y5A3;P35222;B4DGU4;A0A2R8Y7Z0;A0A2R8Y750;A0A2R8Y5C3;A0A2R8Y5Z1;A0A2R8Y6G0	Catenin beta-1	CTNNB1	6838499840	6788499968	6271900160	7395599872	6416999936	6604100096	6318700032	6295099904	6236899840	5825399808	5712799744	5753999872	6506200064	34	34	29	68.2	68.2	62.3	77.206	0	323.31	88211000000	609
A0A2R8Y566;Q9P260;A0A075B785	LisH domain and HEAT repeat-containing protein KIAA1468	KIAA1468	395009984	368220000	268830016	296100000	375550016	239100000	278769984	262430000	229290000	230380000	280329984	311340000	304400000	19	19	19	22.4	22.4	22.4	134.59	0	52.901	4037800000	129
H0YH87;A0A2R8Y7P6;A0A2R8YDM9;F8VQP2;F8WB06;V9GY86;A0A2R8Y5A6;Q99700;F8VRK6	Ataxin-2	ATXN2	0	0	0	0	0	0	0	67882000	0	0	0	0	0	5	5	5	8.3	8.3	8.3	90.166	0.0002924	6.848	223680000	12
A0A2R8Y5F1;A0A2R8YGU4;X5D2U8;H3BMQ0;A0A2R8YDZ2;A0A2R8Y7X5;A0A2R8YDR3;A0A2R8Y7C8;A0A2R8YGD6;P49815;A0A2R8Y6C9	Tuberin	TSC2	0	0	19591000	0	0	0	0	0	0	0	0	0	0	4	4	4	4	4	4	193.03	0.0034412	2.4319	925320000	4
A0A2R8Y5H3;A0A2R8Y7Q9;A0A2R8YEK8;A0A2R8Y5S9;Q9Y5P4;A0A2R8YFA1;A0A2R8YE59;A0A2U3TZL3;A0A2R8YE18;A0A2R8Y7C5	Collagen type IV alpha-3-binding protein	COL4A3BP	0	0	0	0	0	0	0	54873000	0	0	0	0	0	3	3	3	11.1	11.1	11.1	59.269	0.00029525	7.1182	284000000	8
A0A2R8Y5H9;Q8IVT5;A0A0A0MQW1;A8MY87;A0A2R8Y4X0	Kinase suppressor of Ras 1	KSR1	0	0	0	0	261780000	0	0	0	0	0	0	0	0	4	4	4	5	5	5	103.09	0.0016758	2.9237	444390000	6
A0A2R8YFV7;A0A2R8Y5N2;A0A2R8Y5S3;Q92574;A0A2R8Y6S8;A0A2R8Y5J1;A0A2R8Y5Q4;A0A2R8Y6N1;A0A2R8YGL0;A0A2R8Y5F8;A0A2R8YGX7;Q86WV8;A0A2R8Y7E9;A0A2R8Y6W1;Q59IT9	Hamartin	TSC1	0	0	0	0	0	0	0	0	0	0	20249000	0	0	3	3	3	3.5	3.5	3.5	129.27	0.0002949	7.0942	324240000	8
A0A2R8Y5Q8;Q15813;A0A2U3TZJ6;A0A2R8YHI9;A0A2R8YFL4;A0A2R8Y7E7;A0A2R8Y6Q1;A0A2R8Y4V6	Tubulin-specific chaperone E	TBCE	179930000	70180000	123470000	47825000	194330000	82706000	176090000	140910000	128040000	100470000	155970000	155950000	176320000	11	11	11	30.8	30.8	30.8	61.81	0	41.208	1798400000	44
A0A2R8Y5R2;A0A2R8YDB6;A0A2R8Y7K8;A0A2R8YFM1;A0A2R8Y5S6;A0A2R8Y622;A0A2R8YGJ7;A0A2U3TZH5;A0A2R8Y700;A0A2R8Y7A1;A0A2R8YED7;Q8WXI2;A0A2R8YE65	Connector enhancer of kinase suppressor of ras 2	CNKSR2	39391000	0	0	0	0	0	0	0	0	0	0	0	0	3	3	3	10.7	10.7	10.7	33.592	0.0055941	2.2125	81450000	6
A0A2R8Y5S7;P35241;A0A2R8Y7M3	Radixin	RDX	1922800000	2115100032	2163200000	2533499904	2071900032	2451899904	2283300096	2144400000	2633400064	3092400128	1943900032	2637499904	2246599936	37	23	23	55.1	38.6	38.6	69.335	0	230.15	31800000000	270
A0A2R8Y5V9;A0A2R8YH90;A0A2R8YGX3;A0A2R8YEU4			0	0	0	0	0	105470000	0	0	0	0	0	0	0	20	2	1	60.1	11.7	6.5	28.609	0.00027563	5.3971	700320000	13
A0A2R8Y602;A0A2R8YDH5			0	38631000	41530000	0	0	0	0	0	56979000	0	45836000	0	0	6	1	0	26.7	3.4	0	43.351	0.001671	2.8895	437190000	15
A0A2R8Y611			0	0	0	0	0	0	0	0	0	0	0	0	3955900	17	1	1	24.9	1.9	1.9	106.19	0.0012186	3.1802	39274000	7
A0A2R8Y661;A0A2R8YGD3;Q9Y4G8	Rap guanine nucleotide exchange factor 2	RAPGEF2	100300000	147210000	130610000	129970000	105800000	114810000	131420000	103750000	0	0	111680000	107050000	95727000	11	11	11	9.9	9.9	9.9	174.3	0	30.757	1401500000	53
A6NFF4;A0A2R8Y6D7;Q9NS61	Kv channel-interacting protein 2	KCNIP2	35379000	0	0	0	0	0	0	0	0	0	0	0	0	1	1	1	4.9	4.9	4.9	21.508	0.00053191	4.5964	35379000	1
A0A2R8YDF3;A0A2R8Y6L5;A0A2R8Y6I6;Q13627;A0A2R8Y443	Dual specificity tyrosine-phosphorylation-regulated kinase 1A	DYRK1A	0	0	0	0	0	0	0	22328000	0	0	0	0	0	3	3	3	6.4	6.4	6.4	59.538	0.00051033	3.7975	59172000	6
A0A2R8Y6J3;P46777	60S ribosomal protein L5	RPL5	86551000	87587000	101440000	57811000	116010000	0	120050000	135970000	97681000	0	119420000	0	97862000	8	8	8	39.1	39.1	39.1	27.045	0	24.99	1161000000	39
A0A2R8YFH0;E9PHA6;A0A2R8Y6P0;A0A2R8YG02;P43246;A0A2R8Y7S8	DNA mismatch repair protein Msh2	MSH2	0	16168000	0	0	0	0	0	0	0	11602000	0	0	0	3	3	3	4.7	4.7	4.7	102.86	0.00027902	5.6564	129970000	12
A0A2R8Y6X0;Q9H2P0	Activity-dependent neuroprotector homeobox protein	ADNP	0	0	0	0	0	0	23420000	0	0	0	0	0	0	1	1	1	1.4	1.4	1.4	97.225	0.0016687	2.8771	107650000	4
A0A2R8YDQ9;A0A2R8Y6Y7;Q9P2R7;Q5T9Q5	Succinyl-CoA ligase [ADP-forming] subunit beta, mitochondrial	SUCLA2	5253300224	3812400128	4385600000	3714700032	3854099968	5017600000	4617299968	3314099968	3354899968	3920999936	3783399936	4096800000	3972699904	24	24	24	65.4	65.4	65.4	43.841	0	261.17	54850000000	271
A0A2R8YFN7;A0A2R8Y6Z0;O15034	RIMS-binding protein 2	RIMBP2	0	0	0	0	0	0	0	0	0	0	0	28990000	0	1	1	1	2.2	2.2	2.2	88.941	0.0081516	2.0662	56209000	2
A0A2R8Y793			0	73091000	0	0	0	0	0	0	0	0	0	0	0	22	1	1	80.6	3.2	3.2	34.141	0.0021038	2.6538	300080000	7
A0A2R8Y7R9;Q13136	Liprin-alpha-1	PPFIA1	0	0	86670000	73748000	0	0	0	82559000	84336000	0	87915000	0	119850000	11	8	8	12.2	9.5	9.5	138.52	0	12.615	715490000	28
A0A3B3ITP0;A0A2R8Y7Y3;Q4VB86;A0A2R8YD30;A0A2U3TZH6;P11171;A0A2R8Y6D0;A0A2R8Y420;A0A2R8Y7N0;A0A2R8YFR9;A0A2R8Y6G5;A0A2R8Y570;A0A2R8Y5G2;A0A2R8Y5Z6;A0A3B3IU06;A0A1B0GWG0;A0A3B3IUD6;A0A2R8YCW8;A0A2R8Y4N6	Protein 4.1	EPB41	0	0	0	94424000	0	0	0	0	0	0	0	89334000	72869000	9	5	5	21.6	13.7	13.7	60.539	0	10.667	441200000	16
H7C209;A0A2R8Y7Y4;Q8N8A2;H7C4A0	Serine/threonine-protein phosphatase 6 regulatory ankyrin repeat subunit B	ANKRD44	70161000	0	0	0	0	0	0	0	0	0	0	0	0	6	6	5	12	12	9.6	85.604	0	8.6535	531000000	12
A0A2R8Y811;P62263;E5RH77	40S ribosomal protein S14	RPS14	229230000	170830000	193120000	0	0	0	0	0	229710000	156080000	0	0	0	5	5	5	64	64	64	16.159	0	18.742	1538400000	20
A0A2R8Y891;P08237;F8VZI0	ATP-dependent 6-phosphofructokinase, muscle type	PFKM	12222999552	11843999744	11361000448	11269999616	9871200256	10872999936	9934100480	10076000256	10211000320	11251999744	11911999488	9385900032	9857099776	34	32	31	51.8	49.7	48.7	96.907	0	323.31	152040000000	791
H7C560;A0A2U3TZI2;A0A2R8Y8E0;P15056;H7C155;A0A2R8YDP5;P04049	Serine/threonine-protein kinase B-raf;RAF proto-oncogene serine/threonine-protein kinase	BRAF;RAF1	0	0	0	0	0	0	0	0	0	0	0	0	70705000	5	5	5	6.4	6.4	6.4	84.578	0.00027181	5.164	624770000	19
A0A2R8YEX0;A0A2R8YD49;Q9H1P3;A0A2R8YG59;A0A2R8Y5R1;A0A2R8Y362;A0A2R8Y690;A0A2R8YDU7;A0A2R8YG95;E7ET92;A0A087WTV1;A0A2R8YFT0;A0A2R8YG53	Oxysterol-binding protein-related protein 2;Oxysterol-binding protein	OSBPL2	187970000	180450000	160250000	173450000	199500000	122160000	157220000	178210000	213430000	159260000	141810000	143590000	187810000	12	12	12	33.7	33.7	33.7	47.9	0	25.005	2328900000	67
A0A2R8YD50;P51659;E7EWE5;G5E9S2;E7ET17;A0A2R8Y7L2;E7ER27;E7EPL9	Peroxisomal multifunctional enzyme type 2;(3R)-hydroxyacyl-CoA dehydrogenase;Enoyl-CoA hydratase 2	HSD17B4	2290400000	2443099904	2701700096	2510299904	2184999936	2778200064	2298400000	2019800064	2207200000	2300900096	2655000064	2517700096	2178400000	28	28	28	56	56	56	76.837	0	323.31	32183000000	341
A0A2R8YD58;E7EU96;P68400;A0A2R8Y5A0;A0A2R8YF43;A0A2R8YFU2;A0A2R8YDP2;Q8NEV1;A0A2R8Y4D6;A0A2R8Y4H0	Casein kinase II subunit alpha;Casein kinase II subunit alpha 3	CSNK2A1;CSNK2A3	1345900032	1380199936	1209799936	1384600064	1265100032	1350300032	1444999936	1418200064	1298099968	1043900032	1404400000	1528700032	1446499968	18	18	18	58	58	58	44.418	0	149.86	18419000000	183
A0A2R8YD85;A0A2R8Y5U0;Q96BY6	Dedicator of cytokinesis protein 10	DOCK10	0	41152000	0	0	0	0	0	0	0	0	0	0	0	3	3	3	1.7	1.7	1.7	251.31	0.001881	2.7486	103480000	4
A0A2R8YEA7			0	0	0	46132000	0	0	0	0	0	0	0	0	0	8	1	1	74.5	14.6	14.6	17.471	0.00052274	4.2404	109800000	4
A0A2R8YEI5;P52757	Beta-chimaerin	CHN2	0	0	0	0	0	0	84906000	0	0	0	0	0	0	3	3	3	6.4	6.4	6.4	62.44	0.0018899	2.7911	277460000	8
A0A2R8YEM3;E7EQV9;P61313;E7EX53;A0A2R8Y738;E7ENU7	Ribosomal protein L15;60S ribosomal protein L15	RPL15	0	0	0	82354000	0	0	0	0	0	0	0	0	0	4	4	4	26	26	26	19.968	0.00050684	3.7038	251760000	10
A0A2R8YF29;Q9BZ23;V9GYH1;Q9H999	Pantothenate kinase 2, mitochondrial;Pantothenate kinase 3	PANK2;PANK3	0	0	0	0	0	0	56598000	88485000	60488000	0	0	66231000	0	5	5	5	15.9	15.9	15.9	44.793	0.00029429	7.0128	521110000	20
A0A2R8YF87;Q96AX1;H3BMM5;F5H6Y0	Vacuolar protein sorting-associated protein 33A	VPS33A	149050000	169840000	154440000	136010000	220390000	202620000	166880000	164590000	177060000	131700000	170250000	194990000	164600000	14	14	14	26.7	26.7	26.7	71.695	0	82.12	2266100000	97
A0A2R8YFH5;Q15437;Q5QPE2	Protein transport protein Sec23B	SEC23B	0	0	1675399936	0	1538400000	0	1617600000	0	0	0	0	0	0	6	3	3	10.5	5.7	5.7	84.472	0	8.3623	6718500000	16
A0A2R8YFN3;A1Z1Q3	O-acetyl-ADP-ribose deacetylase MACROD2	MACROD2	176370000	166000000	0	129990000	102220000	76940000	108350000	121610000	108420000	96872000	0	99469000	0	10	10	10	31.6	31.6	31.6	50.451	0	122.45	1424300000	31
B1ALK7;A0A2R8YG42;Q14155;E7EUY6;E9PDQ5	Rho guanine nucleotide exchange factor 7	ARHGEF7	580840000	582620032	556449984	425000000	615830016	530740000	502689984	494620000	474140000	470510016	526660000	496289984	482700000	20	20	16	37.7	37.7	32.3	79.831	0	251.83	7060600000	130
A0A2R8YGB3;Q9UNA1	Rho GTPase-activating protein 26	ARHGAP26	106250000	0	98387000	99338000	91935000	99652000	86058000	0	59460000	102550000	102080000	94732000	0	5	5	5	9	9	9	78.414	0	27.829	1131200000	29
A0A2R8YGD1;O14773;A0A2R8Y7U1;A0A2R8YD45	Tripeptidyl-peptidase 1	TPP1	5455600128	5530500096	5130999808	4630600192	4801299968	5848099840	4664800256	4141700096	4205199872	4496799744	4855000064	4797499904	5507800064	8	8	8	30.2	30.2	30.2	50.889	0	310.06	66543000000	215
A0A2R8YGH5;H7C1E4;P61966	AP-1 complex subunit sigma-1A	AP1S1	0	0	0	0	0	0	0	0	0	0	34273000	45851000	0	2	2	2	14.6	14.6	14.6	18.602	0	78.215	150900000	7
A0A2U3TZH3;Q05639	Elongation factor 1-alpha 2	EEF1A2	3170800128	3328300032	2899200000	2883099904	2285299968	3392100096	2783099904	3016499968	1985200000	2708699904	3234599936	2890500096	2070599936	23	13	13	61.1	38.5	38.5	54.34	0	323.31	38920000000	181
H0Y7S3;A0A2U3U055;A0A2U3TZI3;Q01814;A0A2R8Y4R4;Q16720	Plasma membrane calcium-transporting ATPase 2;Plasma membrane calcium-transporting ATPase 3	ATP2B2;ATP2B3	0	0	0	0	0	0	0	0	315040000	0	76680000	0	0	12	5	5	12.7	6.6	6.6	121.26	0	8.4373	746290000	19
E9PNW4;A0A2U3TZL5;E9PR17;P13987;H0YET2	CD59 glycoprotein	CD59	1454599936	1761200000	2495500032	2470099968	1513799936	2006000000	2356100096	1514400000	1394000000	1227600000	1828199936	1357900032	2730299904	6	6	6	30.6	30.6	30.6	11.985	0	31.633	25284000000	55
A0A2U3TZM4;A0A2U3TZN6			0	0	0	0	0	0	34252000	0	0	0	0	0	0	35	1	0	44.1	1.8	0	101.51	0.00026998	4.9832	171500000	6
A0A2U3TZV9;Q3V6T2;A0A2R8Y4X4;A0A2R8YG73;A0A2R8Y7B1;A0A2R8Y4W8;A0A2R8YGU1;A0A087WXD9;A0A2R8YG52	Girdin	CCDC88A	130440000	86659000	114050000	73694000	129230000	78436000	167730000	148970000	111490000	81548000	188090000	96810000	128390000	15	15	15	10.2	10.2	10.2	207.88	0	50.277	1595900000	61
A0A2U3TZY2;H0YGM0;Q9H078;F5H392	Caseinolytic peptidase B protein homolog	CLPB	0	113950000	0	0	0	0	0	86109000	0	110830000	134590000	104600000	0	10	10	4	21.1	21.1	6.6	76.852	0	17.958	977720000	24
A0A384DVU0;Q8IY17	Neuropathy target esterase	PNPLA6	0	47302000	112490000	0	0	93567000	0	0	0	0	0	54188000	0	5	5	5	4.8	4.8	4.8	149.92	0	10.531	404150000	15
A0A3B3IRI2;P17812;A0A3B3IRQ8;A0A3B3ITF6;B4E1E0;A0A3B3ITB8	CTP synthase 1;CTP synthase	CTPS1	492070016	424489984	349070016	410710016	403049984	456830016	401400000	356420000	298680000	457200000	334529984	315449984	331660000	15	15	13	38.8	38.8	34.2	63.723	0	116.94	5194100000	116
A0A3B3IRW2;A0A3B3IRK6;Q13724;A0A3B3IS52;C9J8D4	Mannosyl-oligosaccharide glucosidase	MOGS	0	0	0	0	0	0	0	0	0	0	40499000	0	0	3	3	3	8	8	8	62.248	0.00028827	6.5194	136360000	7
A0A3B3IRL2;O75629	Protein CREG1	CREG1	0	0	0	0	0	0	0	0	0	0	0	81706000	0	1	1	1	8.2	8.2	8.2	28.058	0.00075815	3.6745	425750000	6
A0A3B3IRM0;O75165	DnaJ homolog subfamily C member 13	DNAJC13	0	0	0	0	0	0	0	0	0	0	0	0	10170000	1	1	1	1.9	1.9	1.9	70.871	0.004983	2.3323	62379000	10
A0A3B3IRM5;P46439;Q5T8R1	Glutathione S-transferase Mu 5	GSTM5	1042700032	370680000	139560000	483830016	393340000	534440000	297950016	744590016	661299968	448950016	412849984	207200000	644979968	20	9	9	87.8	48.7	48.7	22.445	0	41.623	7015900000	88
A0A3B3IRN5;Q06828	Fibromodulin	FMOD	105990000	0	0	399830016	220740000	0	675880000	0	107870000	244040000	114470000	0	206280000	6	6	6	29.6	29.6	29.6	32.768	0	46.578	2192400000	39
F5H345;A0A3B3IRR1;A0A3F2YNY7;P08397;A0A3B3IU56;F5GY90;A0A1W2PNU5;F5H226;A0A3B3IU34;F5H0P4	Porphobilinogen deaminase	HMBS	41721000	0	0	0	0	0	0	52449000	0	0	56914000	0	0	4	4	4	18.2	18.2	18.2	35.761	0	20.501	518810000	19
C9J3L8;C9J5W0;A0A3B3IRT8;E9PAL7;C9IZQ1;P43307	Translocon-associated protein subunit alpha	SSR1	0	0	0	84409000	0	0	0	0	0	0	0	0	0	2	2	2	8.7	8.7	8.7	29.573	0.0014472	3.0232	185250000	5
A0A3B3IRY9;O15079	Syntaphilin	SNPH	94151000	77152000	98347000	83950000	67242000	85797000	74173000	0	68130000	74118000	0	89648000	0	5	5	4	11.2	11.2	9.3	56.836	0	38.216	863210000	26
B7Z647;A0A3B3IS17;A0A3B3ISQ5;B9EGL1;P78352;A0A3B3ISR0;B7Z3U2;A0A3B3IU19	Disks large homolog 4	DLG4	1634499968	1505200000	1221299968	1122200064	1145200000	1232600064	1284099968	1012200000	959420032	1153900032	1196400000	1258099968	1091000064	28	28	25	52.6	52.6	45.6	73.871	0	217.98	16434000000	223
Q5T8C6;A0A3B3ISD2;Q13042	Cell division cycle protein 16 homolog	CDC16	0	0	0	0	0	0	0	0	0	0	0	0	24652000	1	1	1	4.8	4.8	4.8	54.704	0.0016742	2.9094	121680000	4
B4DKB2;A0A3B3ISF9;P42892	Endothelin-converting enzyme 1	ECE1	0	0	0	0	0	0	0	0	0	0	0	0	17166000	1	1	1	3.3	3.3	3.3	83.573	0	10.182	134100000	7
A0A3B3ISG5;P14735	Insulin-degrading enzyme	IDE	0	0	0	0	0	0	0	0	0	0	48510000	58372000	58901000	4	4	4	4.1	4.1	4.1	117.94	0	7.1678	482930000	23
A0A3B3ISP1;Q92625	Ankyrin repeat and SAM domain-containing protein 1A	ANKS1A	0	0	19710000	23008000	22174000	0	20797000	0	0	0	0	0	18545000	3	3	3	3.3	3.3	3.3	129.9	0.00028458	6.072	157850000	21
A0A3B3ITU4;F5H2D0;A0A3B3ISR2;B4DPQ0;P00736	Complement C1r subcomponent;Complement C1r subcomponent heavy chain;Complement C1r subcomponent light chain	C1R	0	0	33174000	44212000	0	0	0	0	0	0	40804000	0	0	4	4	4	12.5	12.5	12.5	39.779	0.00028588	6.1755	218770000	15
A0A3B3ISS9;P01241;P01242	Somatotropin;Growth hormone variant	GH1;GH2	21375000576	0	0	880880000	97773000	0	370089984	0	0	0	0	0	0	10	10	10	44.8	44.8	44.8	35.349	0	253.74	24142000000	58
A0A3B3ISV3;P02462	Collagen alpha-1(IV) chain;Arresten	COL4A1	1112600064	1573299968	1057400000	661340032	1543200000	461560000	831289984	888030016	1024600000	737840000	1311399936	967020032	819360000	8	8	8	32.6	32.6	32.6	39.731	0	323.31	14093000000	111
H3BSW0;A0A3B3ISV5;Q8N9N7	Leucine-rich repeat-containing protein 57	LRRC57	254810000	248490000	272489984	289190016	247760000	275920000	272489984	127110000	206110000	0	210680000	237750000	248970000	7	7	7	44.6	44.6	44.6	16.324	0	10.757	3137500000	36
A0A3B3ISX9;A0A140T8Z8;A0A140T9C0;A0A140T902;A0A140T8Y3;A0A140TA52;A0A140TA41;A0A140TA33;P22105;A0A140T923;A0A140T956	Tenascin-X	TNXB	0	0	0	0	0	0	0	0	0	0	0	0	21267000	4	4	4	1	1	1	485.42	0.0051837	2.2856	660170000	6
A0A3F2YNW9;A0A3B3IUA1;A0A3B3IU40;A0A3B3IT28;A0A3B3ITE5;A0A3B3ITF7;A0A3B3ITW6;Q12756;A0A3B3ITK3;F8W8V9	Kinesin-like protein KIF1A;Kinesin-like protein	KIF1A	623400000	565920000	569120000	605180032	602040000	538160000	645660032	554099968	483620000	538640000	535540000	618670016	552440000	32	32	31	25.6	25.6	24.8	191.9	0	151.95	7811600000	223
A0A3B3IT47;Q9Y2I8;C9JGR9;E7EQ49;A0A087WTQ2	WD repeat-containing protein 37	WDR37	473529984	476700000	480750016	530120000	420929984	484070016	458980000	362860000	334280000	500769984	433920000	399700000	393280000	17	17	17	38.9	38.9	38.9	63.833	0	49.506	5854800000	100
H0Y3A3;A0A3B3ITG3;Q5VWQ8	Disabled homolog 2-interacting protein	DAB2IP	0	0	0	54346000	0	0	0	0	0	0	0	0	0	7	4	4	7.5	5.3	5.3	118.06	0.0002858	6.1631	137780000	9
A0A3B3ITH3;Q9P2X3;J3QQU0	Protein IMPACT	IMPACT	176010000	129050000	166170000	0	113100000	125180000	130830000	0	111400000	0	121030000	0	0	8	8	8	30.4	30.4	30.4	37.452	0	29.731	1377100000	38
A0A3B3ITP4;Q495G5;Q8IVH4;A0A3B3IRG3;D6RIS5	Methylmalonic aciduria type A protein, mitochondrial	MMAA	36167000	0	48870000	0	0	0	0	0	0	0	0	0	0	4	4	4	13.1	13.1	13.1	44.22	0.00027533	5.3786	294310000	15
A0A3B3ITT1;Q6IQ22	Ras-related protein Rab-12	RAB12	100760000	98946000	110190000	96462000	109250000	111960000	110200000	0	74068000	0	0	0	87762000	6	6	6	19.4	19.4	19.4	36.315	0	11.192	1126200000	33
E9PN17;A0A3B3ITX4;O75964	ATP synthase subunit g, mitochondrial	ATP5L	997689984	1419800064	1082000000	286630016	1074300032	821289984	1327699968	2376000000	1855800064	1206300032	2315399936	2494500096	2510700032	6	6	6	64.5	64.5	64.5	8.4518	0	92.381	20967000000	120
A0A3B3ITZ9;Q9Y2W1	Thyroid hormone receptor-associated protein 3	THRAP3	195230000	137990000	0	0	214550000	193970000	0	176590000	184810000	0	123130000	139880000	0	11	11	11	16.5	16.5	16.5	103.52	0	26.754	1686000000	52
A0A3B3IU33;Q9Y303;H3BQ15	Putative N-acetylglucosamine-6-phosphate deacetylase	AMDHD2	72916000	64788000	66609000	65128000	0	0	0	81828000	84338000	0	75553000	0	0	3	3	3	11.1	11.1	11.1	41.333	0	54.408	612480000	21
A0A3B3IU55;Q8WXE9	Stonin-2	STON2	135140000	196220000	318120000	240120000	291470016	262600000	310700000	240260000	296510016	272190016	203720000	295849984	285380000	14	14	14	22.7	22.7	22.7	108.96	0	76.691	3412900000	74
F8W717;A0A3B3IU69;O00423;G3V500;G3V3N9	Echinoderm microtubule-associated protein-like 1	EML1	0	0	0	0	0	0	0	0	0	0	0	0	30793000	4	3	3	5.9	4.9	4.9	88.716	0.0014475	3.0249	204540000	9
A0A3B3IUB1;Q13144;A0A3B3ISX3;A0A3B3ITG6	Translation initiation factor eIF-2B subunit epsilon	EIF2B5	0	0	0	49625000	0	0	0	0	0	0	0	0	0	5	5	5	8.6	8.6	8.6	81.222	0.00075301	3.5735	189100000	7
A0A3B3IUC0;Q9Y287	Integral membrane protein 2B;BRI2, membrane form;BRI2 intracellular domain;BRI2C, soluble form;Bri23 peptide	ITM2B	41676000	41303000	0	51457000	0	0	40268000	0	57110000	55235000	55871000	0	0	3	3	3	20.5	20.5	20.5	24.2	0	9.0691	420660000	20
A0A3B3IUC1			0	0	0	0	0	0	0	0	0	0	0	0	4018400	1	1	1	22.2	22.2	22.2	9.1686	0.00050891	3.7661	11302000	1
X6RGP5;A0A3F2YNX0;A0A3F2YNZ0;F1T0I1;O15027;A0A0C4DH09	Protein transport protein Sec16A	SEC16A	0	32842000	42317000	48858000	58018000	0	0	44282000	64831000	0	0	50526000	44631000	6	6	6	8.8	8.8	8.8	115.22	0	33.519	472620000	29
R4GNF8;A0A3F2YNX7;Q7L5Y1	Mitochondrial enolase superfamily member 1	ENOSF1	0	0	0	0	0	0	0	0	0	0	0	0	0	1	1	1	17.3	17.3	17.3	11.072	0.0053763	2.2181	0	1
A0A5E8;Q99501	GAS2-like protein 1	GAS2L1	0	0	0	0	0	0	0	0	0	297809984	0	0	0	5	5	5	8.5	8.5	8.5	72.688	0.0005176	4.0559	175840000	5
A0AVT1	Ubiquitin-like modifier-activating enzyme 6	UBA6	809260032	828889984	884659968	908200000	875800000	1019600000	997660032	901760000	836060032	846400000	844080000	880480000	826849984	31	31	31	38.2	38.2	38.2	117.97	0	110.18	11834000000	225
A0MZ66	Shootin-1	KIAA1598	350360000	300000000	245600000	257990000	244000000	350300000	323540000	323480000	257430000	402920000	337400000	258750000	308430016	18	18	18	24.7	24.7	24.7	71.639	0	68.392	4061400000	89
A1L0T0;M0R026;E9PJS0	Acetolactate synthase-like protein	ILVBL	231840000	219630000	222880000	177830000	229360000	220920000	251000000	241380000	323140000	257650000	316790016	265670000	296880000	12	12	12	32.8	32.8	32.8	67.867	0	122.56	3422800000	91
A2A2V1;P04156;X6RKS3	Major prion protein	PRNP	1049299968	1084800000	1171399936	1134599936	1175200000	1029699968	1324700032	803280000	935779968	1023200000	870560000	737820032	857089984	8	8	8	39	39	39	27.278	0	43.965	13592000000	87
H7BYP1;G5E9G1;A2A3F3;A2A3F4;E9PBI7;A2A3F7;Q9HCF6;H0YKU7;A0A0A0MTQ9;A0A0G2JPN6;A0A0G2JMJ5;A0A0G2JMR4;A0A0G2JN34;Q7Z4N2	Transient receptor potential cation channel subfamily M member 3;Transient receptor potential cation channel subfamily M member 1	TRPM3;TRPM1	0	0	0	0	0	203240000	0	0	0	0	0	0	0	2	2	2	1.2	1.2	1.2	177.77	0.00794	2.069	640180000	5
A2IDC6;Q13084;Q4TT37	39S ribosomal protein L28, mitochondrial	MRPL28	0	0	0	0	0	0	0	0	0	0	27089000	38201000	0	3	3	3	17.9	17.9	17.9	28.506	0.00075758	3.6694	204870000	12
H0Y5G7;A2RRP1	Neuroblastoma-amplified sequence	NBAS	0	66760000	51658000	0	82850000	0	53699000	54098000	62621000	0	40505000	35807000	49123000	7	7	7	6.6	6.6	6.6	160.41	0	13.102	692660000	30
A2RTX5;B7ZLP8	Probable threonine--tRNA ligase 2, cytoplasmic	TARSL2	131320000	111430000	98967000	0	117140000	128420000	121780000	120670000	126850000	117200000	157270000	118430000	128310000	11	10	10	16.3	15.3	15.3	92.644	0	24.093	1581500000	61
Q69YM1;A2RU67	Uncharacterized protein KIAA1467	DKFZp762C0813;KIAA1467	0	0	0	0	0	0	0	0	0	0	0	0	37055000	1	1	1	4	4	4	35.153	0.0021092	2.6928	338530000	11
A3KMH1	von Willebrand factor A domain-containing protein 8	VWA8	0	0	0	0	0	0	0	0	0	0	177500000	206020000	0	6	6	6	4.5	4.5	4.5	214.82	0	7.213	1036800000	15
A4D126	Isoprenoid synthase domain-containing protein	ISPD	27419000	0	32191000	0	0	0	0	0	0	0	0	0	0	4	4	4	9.8	9.8	9.8	49.872	0.00027594	5.4335	209340000	17
C9J1X0;A4D1P6	WD repeat-containing protein 91	WDR91	65564000	61444000	0	82860000	83998000	0	0	0	0	62538000	63598000	0	0	8	8	8	13.8	13.8	13.8	79.239	0	32.468	493700000	34
A5A3E0	POTE ankyrin domain family member F	POTEF	0	0	0	0	0	0	0	0	0	0	0	17286000	0	11	2	2	12.9	4.8	4.8	121.44	0.005172	2.2701	73408000	4
A5YKK6	CCR4-NOT transcription complex subunit 1	CNOT1	0	0	0	0	0	34961000	0	0	0	0	36746000	34706000	0	8	8	8	3.7	3.7	3.7	266.94	0.0002862	6.2509	232940000	19
A5YM72	Carnosine synthase 1	CARNS1	201820000	85637000	0	0	0	0	130500000	81749000	118800000	98061000	93070000	109470000	96382000	9	8	8	17.3	16.4	16.4	88.483	0	34.556	1157900000	40
H3BTL1;Q9GZQ8;A6NCE7	Microtubule-associated proteins 1A/1B light chain 3B;Microtubule-associated proteins 1A/1B light chain 3 beta 2	MAP1LC3B;MAP1LC3B2	0	0	0	0	0	0	0	0	562640000	0	0	0	0	3	1	1	37.3	18.7	18.7	9.0115	0.00098401	3.3078	9585500000	32
A6NCS6	Uncharacterized protein C2orf72	C2orf72	0	0	0	11995000	0	0	0	0	0	0	0	0	0	3	3	3	12.5	12.5	12.5	30.48	0	7.6139	224840000	12
A6NDG6	Phosphoglycolate phosphatase	PGP	340900000	295300000	282400000	268790016	269960000	286230016	303289984	288380000	240520000	0	316040000	316369984	311380000	12	12	12	64.2	64.2	64.2	34.006	0	73.501	3840500000	86
A6NDU8;A0A0C4DGW6	UPF0600 protein C5orf51	C5orf51	183200000	168170000	128410000	0	242630000	154440000	194480000	149900000	153030000	0	134040000	149620000	144110000	4	4	4	20.7	20.7	20.7	33.62	0	12.688	2010800000	28
A6NEM2;P51610	Host cell factor 1;HCF N-terminal chain 1;HCF N-terminal chain 2;HCF N-terminal chain 3;HCF N-terminal chain 4;HCF N-terminal chain 5;HCF N-terminal chain 6;HCF C-terminal chain 1;HCF C-terminal chain 2;HCF C-terminal chain 3;HCF C-terminal chain 4;HCF C-terminal chain 5;HCF C-terminal chain 6	HCFC1	106110000	134220000	99799000	109380000	107870000	130810000	72424000	129800000	116500000	0	108360000	70384000	78047000	13	13	13	8.2	8.2	8.2	213.47	0	36.775	1392400000	47
H7BXY6;A6NEP9;Q8NG11	Tetraspanin;Tetraspanin-14	TSPAN14	0	0	0	0	0	0	0	0	0	0	0	0	0	1	1	1	5.2	5.2	5.2	23.918	0.0016823	2.9682	0	5
A6NFQ9;F8W8I8;A0A087X142		2008-09-01	0	0	0	0	0	0	0	0	0	0	0	0	26405000	28	1	1	65.2	5	5	50.927	0	7.472	309610000	6
A6NFX8;Q9UKK9;A6NJU6;A6NCQ0	ADP-sugar pyrophosphatase	NUDT5	537840000	557379968	566670016	805590016	602209984	619779968	575950016	692920000	663400000	956960000	593219968	566860032	695249984	12	12	12	59.9	59.9	59.9	25.895	0	34.487	8405800000	114
K7EIJ0;K7ENL2;A6NG10;K7EMC9;Q969T9;K7EIN1;K7ESN4	WW domain-binding protein 2	WBP2	462830016	501120000	615760000	597270016	580150016	433940000	546200000	505180000	447249984	428489984	530310016	498580000	586179968	6	6	6	34.7	34.7	34.7	18.224	0	18.336	7221500000	44
A6NGJ0;P51808;F2Z328	Dynein light chain Tctex-type 3	DYNLT3	163270000	190830000	0	0	182990000	213260000	277830016	170840000	155490000	242790000	181960000	188130000	257060000	4	4	4	55.9	55.9	55.9	16.979	0	37.291	2474900000	30
A6NHL2	Tubulin alpha chain-like 3	TUBAL3	0	0	0	0	0	0	0	0	0	0	0	0	1071400000	6	1	1	10.5	3.8	3.8	49.908	0	15.168	37683000000	42
J3KTL8;A6NHR9	Structural maintenance of chromosomes flexible hinge domain-containing protein 1	SMCHD1	0	0	0	0	0	0	0	22943000	0	0	0	0	0	3	3	3	2.2	2.2	2.2	155.65	0.0012255	3.253	187300000	14
A6NHX0	GATS-like protein 2	GATSL2	127110000	125450000	133900000	158480000	136300000	0	129730000	147820000	124280000	136430000	149080000	139510000	119550000	6	6	6	29.2	29.2	29.2	36.056	0	49.382	1796400000	45
A6NIH7	Protein unc-119 homolog B	UNC119B	0	85635000	0	67565000	0	91855000	0	0	0	0	0	0	0	5	5	5	29.5	29.5	29.5	28.136	0.00028531	6.1299	762880000	15
A6NIW2;Q5JSL3;A0A0J9YW64	Dedicator of cytokinesis protein 11	DOCK11	0	0	0	0	0	0	0	2189500	0	0	0	0	0	2	2	2	1.2	1.2	1.2	238.1	0.0055853	2.1846	34375000	2
A6NIZ0;Q9GZM8;J3KRK9;J3QL85	Nuclear distribution protein nudE-like 1	NDEL1	103430000	159820000	113530000	135690000	98041000	0	112500000	84217000	99565000	0	91666000	121710000	135160000	5	5	5	21.6	21.6	21.6	30.638	0	10.178	1410900000	37
H7C2P7;A6NJD9;A8MVT4;A8MYK1;Q16540	39S ribosomal protein L23, mitochondrial	MRPL23	0	0	0	0	0	0	0	0	0	0	0	37604000	0	2	2	2	18.6	18.6	18.6	13.669	0.00026874	4.8694	93207000	3
A6NKN8	Purkinje cell protein 4-like protein 1	PCP4L1	0	0	0	0	0	0	0	0	0	13783000	0	0	0	1	1	1	20.6	20.6	20.6	7.4762	0.0057958	2.1694	6199300	1
A6NKZ2;P51606	N-acylglucosamine 2-epimerase	RENBP	256670000	283190016	269480000	290820000	213360000	299740000	166510000	276070016	361300000	0	294369984	199040000	165600000	8	8	8	21.5	21.5	21.5	47.065	0	81.084	3324300000	66
E9PJK1;E9PRJ8;H0YDL9;H0YDJ9;E9PIF1;A6NMH8;P60033	Tetraspanin;CD81 antigen	CD81	3297799936	3553999872	3822899968	2997299968	2730899968	4606499840	4936999936	3786800128	3831699968	4092999936	3106400000	2866500096	3694400000	5	5	5	44.2	44.2	44.2	17.963	0	323.31	50343000000	148
A6NMN0;P46020;A6NIT2	Phosphorylase b kinase regulatory subunit alpha, skeletal muscle isoform	PHKA1	155030000	185430000	384900000	203200000	190150000	217740000	217020000	162250000	168320000	155090000	243350000	111760000	191630000	13	13	12	14	14	13.1	139.05	0	35.296	2747500000	44
A6NNK5;Q12888	Tumor suppressor p53-binding protein 1	TP53BP1	0	40430000	0	0	0	0	0	33311000	54439000	0	0	0	0	7	7	7	5.2	5.2	5.2	209.02	0	44.434	524140000	19
A6NP16;E7ERM3;Q4VCS5	Angiomotin	AMOT	0	0	0	0	0	0	0	0	0	0	0	0	16971000	2	2	2	3.7	3.7	3.7	68.392	0.00099552	3.4512	49472000	3
A6PW57;Q99755	Phosphatidylinositol 4-phosphate 5-kinase type-1 alpha	PIP5K1A	0	0	0	0	0	0	0	0	0	0	0	0	21190000	3	1	1	7.6	3.6	3.6	61.257	0	28.162	497710000	13
A6XGL0	YjeF N-terminal domain-containing protein 3	YJEFN3	0	0	0	0	0	0	0	0	0	0	28508000	0	0	5	3	3	27.8	20.4	20.4	32.585	0	7.2479	101620000	5
A6ZKI3;Q17RB0	Protein FAM127A;Protein FAM127C	FAM127A;FAM127C	0	0	0	0	0	0	0	0	0	0	0	18407000	0	4	4	4	29.2	29.2	29.2	13.171	0.00027747	5.5357	139370000	14
G3V174;A7KAX9	Rho GTPase-activating protein 32	ARHGAP32	0	0	0	6438500	0	0	0	0	0	0	0	0	0	3	3	3	3.8	3.8	3.8	104.57	0.0045537	2.3682	913690000	9
A8K878;P55145	Mesencephalic astrocyte-derived neurotrophic factor	MANF	0	0	0	65959000	0	64356000	0	0	0	0	0	0	0	6	6	6	28.1	28.1	28.1	21.143	0	9.0216	531800000	15
A8K968			0	0	0	110680000	0	0	0	209340000	0	0	0	0	85424000	50	2	1	68.9	4.2	2	84.711	0	15.915	732130000	16
R9WNI0;A8MQB8;G3V0J0;Q06787;Q8IXW7;A0A087WXI3;A0A087WY29	Fragile X mental retardation protein 1	FMR1	0	0	23731000	29668000	0	0	0	0	0	0	0	0	0	7	6	6	13.1	11.6	11.6	61.515	0	9.0755	251570000	21
A8MTY9;O14972;A8MY26	Down syndrome critical region protein 3	DSCR3	87976000	82948000	0	0	0	0	84785000	81703000	0	0	79819000	64695000	83743000	4	4	4	20.5	20.5	20.5	27.958	0	13.919	909140000	23
A8MUA9;A8MU27;P55854;Q6EEV6	Small ubiquitin-related modifier 3;Small ubiquitin-related modifier 4	SUMO3;SUMO4	0	0	0	0	0	0	0	0	0	0	330590016	0	0	2	2	1	18.5	18.5	9.6	15.317	0.00050878	3.7644	5698700000	12
A8MUM1;Q53HC9;C9J0U9;C9JVR6;D3YTH5	Protein TSSC1	TSSC1	301580000	284260000	295369984	274270016	292940000	299780000	303160000	220390000	253830000	262220000	238630000	254950000	266140000	10	10	10	33.8	33.8	33.8	46.319	0	36.669	3625600000	69
Q49AN9;F5H013;P62308;A8MWD9	Small nuclear ribonucleoprotein G;Putative small nuclear ribonucleoprotein G-like protein 15	SNRPG;SNRPGP15	0	0	0	0	0	0	0	93734000	103270000	0	85910000	0	0	2	2	2	20.3	20.3	20.3	7.1013	0.00075605	3.6336	619570000	19
A8MXB7;Q9Y343	Sorting nexin-24	SNX24	0	0	0	0	28729000	24651000	0	25680000	0	0	0	0	0	2	2	2	9.9	9.9	9.9	23.728	0.00099305	3.435	211100000	22
F5GYS3;A8MXU7;Q92934	Bcl2-associated agonist of cell death	BAD	0	0	0	0	0	0	31095000	0	0	0	0	0	0	1	1	1	10.2	10.2	10.2	16.649	0.00052315	4.2431	145360000	8
A8MXV4	Nucleoside diphosphate-linked moiety X motif 19, mitochondrial	NUDT19	49673000	0	0	0	0	0	0	0	0	0	0	0	0	2	2	2	6.9	6.9	6.9	42.233	0.00099651	3.4586	186400000	4
A8MYV2;Q9NQ29;B8ZZ10	Putative RNA-binding protein Luc7-like 1	LUC7L	0	0	0	0	0	0	0	0	0	0	0	9724200	0	5	1	1	20.6	3.3	3.3	32.447	0.0095819	1.9543	21941000	10
A8MZF9;P55039;J3QRI9;J3QKW7	Developmentally-regulated GTP-binding protein 2	DRG2	38990000	0	0	38663000	0	0	45507000	0	0	0	0	0	0	4	4	4	15.2	15.2	15.2	38.129	0.00027832	5.6067	201780000	14
J3QL64;A8MZH3;P02686;E9PJ72;E9PMR5;C9J6H1;H0YF02;H0YEA2;J3QKL5;J3QQK6;E9PNZ1;E9PKX9	Myelin basic protein	MBP	37718999040	30621999104	33984000000	16606999552	24935999488	14990000128	54784000000	10693999616	12513999872	24925999104	35856998400	14739999744	25244000256	10	10	2	52.9	52.9	10.8	17.119	0	107	394190000000	413
A9C4B8;Q96N66;H7C2M4;C9J4E9;A0A0G2JNX6;M0R1Z5	Lysophospholipid acyltransferase 7	MBOAT7	0	0	0	0	0	0	0	0	0	0	36764000	0	0	2	2	2	14.8	14.8	14.8	28.599	0.00027755	5.5375	120050000	4
H0Y2N6;J3QQI9;B0QY36;H0Y645;B0QY35;B0QY34;H7BYT1;P48730;P49674	Casein kinase I isoform delta;Casein kinase I isoform epsilon	CSNK1D;CSNK1E	11808000	0	0	0	0	0	0	0	0	0	0	0	0	2	2	2	22.5	22.5	22.5	13.677	0.0093948	1.9876	11808000	1
B0QY89;Q9Y262;B0QY90	Eukaryotic translation initiation factor 3 subunit L	EIF3L	382280000	388230016	410420000	383710016	417540000	383929984	395640000	421960000	433280000	469780000	420480000	414020000	427100000	21	21	21	38.2	38.2	38.2	70.901	0	128.74	5481100000	141
B0QYF7;Q8WVH6;F2Z2F1;B0QYF8;P02144	Myoglobin	MB	0	0	0	0	0	0	23461000	0	0	0	0	0	0	1	1	1	18.9	18.9	18.9	8.0683	0.0079418	2.0691	45816000	3
B0QYK0;Q01844;A0A0D9SFL3;C9JGE3;H7BY36	RNA-binding protein EWS	EWSR1	232170000	279009984	278190016	298670016	296169984	234360000	213110000	306620000	244490000	0	249030000	239920000	265310000	5	5	5	11.7	11.7	11.7	64.929	0	113.91	3399700000	46
H3BQQ9;B0QYN7;P63279;H3BPC4	SUMO-conjugating enzyme UBC9	UBE2I	0	0	154630000	0	0	208170000	0	0	0	0	189060000	0	0	6	6	6	56.9	56.9	56.9	15.516	0	9.3069	2011600000	21
F2Z2V0;B0QZ18;Q99829;A6PVH9;E7ENH5;Q5JX45;Q5JX56;Q5JX58;Q5JX59;Q5JX60;Q5JX44;Q5JX54;Q5JX55;Q5JX61;Q5JX52	Copine-1	CPNE1	239720000	328720000	418040000	454710016	476940000	420940000	448000000	239750000	458960000	620040000	449240000	406870016	498910016	10	10	10	27.4	27.4	27.4	58.634	0	134.03	5501200000	72
B0YIW2;P02656	Apolipoprotein C-III	APOC3	0	0	0	0	180690000	0	0	0	0	0	80665000	0	0	2	2	2	23.1	23.1	23.1	12.815	0	129.59	375780000	8
B1AH87;P30536	Translocator protein	TSPO	0	0	0	0	0	0	0	101390000	0	43851000	0	0	0	2	2	2	29	29	29	11.896	0	12.891	406180000	8
B1AHA8;P09601	Heme oxygenase 1	HMOX1	0	0	57871000	29351000	0	0	0	0	0	0	0	0	0	2	2	2	20.3	20.3	20.3	21.583	0.0002942	7.009	93868000	5
B1AHL2	Fibulin-1	FBLN1	0	0	0	0	0	0	0	0	0	70951000	0	0	0	5	2	2	10.7	5.4	5.4	78.329	0.00051177	3.8547	57121000	2
B1AK87;B1AK88		CAPZB	3406899968	3627500032	4076999936	3907099904	3758200064	4312000000	3643699968	3074500096	3264300032	4054400000	3580699904	3521100032	3766700032	25	25	5	75.8	75.8	9.2	29.295	0	323.31	50520000000	355
B1AKD8;Q5TZA2;A0A087WW81	Rootletin	CROCC	0	0	0	0	0	0	0	0	0	0	1224199936	0	0	2	2	2	1.1	1.1	1.1	149.06	0.0062222	2.1461	10108000000	18
B1AKG0;Q03591	Complement factor H-related protein 1	CFHR1	0	0	0	0	51702000	0	0	0	0	0	0	0	0	4	2	2	15.1	7.7	7.7	30.858	0.0012171	3.167	53446000	2
F5H7V1;B1AKJ5;O43847;G3V1R5;H0Y5G9	Nardilysin	NRD1	0	0	0	0	52040000	0	0	0	0	0	0	0	0	4	4	4	4.5	4.5	4.5	108.71	0.0002733	5.2614	263780000	10
B1AKV2;B1AKV6;B1AKV3;Q9NVA1;F8WCR2;B1AKV4;F6UTR7	Ubiquinol-cytochrome-c reductase complex assembly factor 1	UQCC1	0	0	49637000	0	0	0	0	0	0	0	0	0	0	2	2	2	9.5	9.5	9.5	25.49	0.0062126	2.1408	372660000	15
B1AKY9;P50993;H0Y7C1	Sodium/potassium-transporting ATPase subunit alpha-2	ATP1A2	6633099776	5038900224	9648100352	7692499968	6575399936	5708800000	7178800128	8052700160	7311300096	4614400000	7377699840	4941799936	7015399936	42	42	26	47.3	47.3	28.3	110.86	0	323.31	95938000000	530
B1ALA9;P60891;A0A2R8Y7H4;B7ZB02	Ribose-phosphate pyrophosphokinase 1	PRPS1	3569799936	3324900096	3033400064	3300000000	3432699904	3067500032	3270000128	3127800064	4164800000	3076000000	3311399936	3369200128	3122800128	16	16	8	62.8	62.8	30.5	31.392	0	226.92	46159000000	306
B1ALY0;C9JZH4		PALM2-AKAP2;PALM2	0	0	0	0	0	0	0	0	0	0	0	0	33909000	5	1	1	12.9	3	3	47.626	0.0045351	2.3349	146290000	8
B1AMB1;B1AMB2;Q9BPZ7	Target of rapamycin complex 2 subunit MAPKAP1	MAPKAP1	0	0	0	0	0	0	0	0	0	0	0	0	11998000	1	1	1	15.1	15.1	15.1	10.36	0.0045527	2.3671	104230000	5
B1AMS2;Q14141	Septin-6	2006-09-01	1328300032	1256400000	1141799936	1024200000	1133900032	967500032	1114300032	862209984	1047600000	1029800000	774460032	1106200064	1175200000	23	13	13	55	39.2	39.2	49.303	0	323.31	14463000000	112
B1AN99;P35030	Trypsin-3	PRSS3	0	0	0	0	0	0	0	0	0	0	0	0	62251000	1	1	1	7.3	7.3	7.3	19.288	0.00075358	3.5925	696220000	9
B1ANR0;Q13310;H0Y5F5	Polyadenylate-binding protein;Polyadenylate-binding protein 4	PABPC4	0	0	92558000	0	85032000	0	0	108460000	0	0	0	0	0	15	6	5	27.3	12	10.6	67.97	0.00028794	6.4912	514460000	13
H3BLV0;B1AP13;H7BY55;P08174;B1AP15	Complement decay-accelerating factor	CD55	135010000	102400000	131000000	129850000	163750000	0	144280000	0	192680000	0	91717000	0	275900000	6	6	6	25.8	25.8	25.8	35.695	0	35.154	1561300000	35
G3V4W0;B4DY08;B2R5W2;G3V4C1;P07910;G3V576;G3V2Q1;G3V2D6;G3V555;G3V5V7;G3V575	Heterogeneous nuclear ribonucleoproteins C1/C2	HNRNPC	6067599872	6077400064	4444599808	5310099968	6440699904	6937299968	4840300032	6988299776	5177500160	5270400000	5356499968	5262799872	4862900224	15	15	15	48.1	48.1	48.1	28.916	0	84.375	76810000000	231
F5H5N2;B4DNC9;B3KQ30;Q9H1K1	Iron-sulfur cluster assembly enzyme ISCU, mitochondrial	ISCU	152440000	119900000	0	0	0	113230000	0	0	83353000	0	68063000	0	0	5	5	5	40.3	40.3	40.3	16.64	0.00028474	6.0853	794010000	21
B3KS98;O15372;A0A087WZK9;E5RJT0	Eukaryotic translation initiation factor 3 subunit H	EIF3H	235510000	168070000	241240000	220130000	176240000	244100000	217340000	0	0	331720000	221030000	257770000	0	10	10	10	34.4	34.4	34.4	41.581	0	50.418	2378300000	46
M0QZP4;B3KSI3;M0QZ10;M0QXF9;O15382	Branched-chain-amino-acid aminotransferase;Branched-chain-amino-acid aminotransferase, mitochondrial	BCAT2	0	0	0	68382000	0	0	0	0	0	0	0	0	0	4	4	4	14.7	14.7	14.7	34.897	0.00028877	6.5955	227660000	9
B3KVK2		GNB1	0	0	0	0	0	99834000	0	0	0	0	0	0	0	7	1	1	61.7	10.8	10.8	25.935	0	9.4366	314400000	7
F5GWS2;B3KXJ3;B4DFJ8;Q13336	Urea transporter 1	SLC14A1	0	0	0	0	0	0	0	178020000	0	0	0	0	0	3	3	3	14.8	14.8	14.8	28.084	0.00028209	5.8765	836120000	14
B3KY94;O14735	CDP-diacylglycerol--inositol 3-phosphatidyltransferase	CDIPT	91339000	126840000	0	118630000	74705000	0	96487000	86636000	93568000	0	0	0	0	4	4	4	19.8	19.8	19.8	25.946	0.00051706	4.0438	958990000	25
B4DDD6		DBNL	0	0	0	0	0	0	0	0	0	0	0	0	58300000	13	1	1	42.9	3.2	3.2	45.746	0	39.456	569180000	12
B4DDG0;B4E171;P41732	Tetraspanin;Tetraspanin-7	TSPAN7	0	0	0	0	0	0	0	0	0	0	0	45722000	0	2	2	2	9	9	9	29.351	0	42.529	272600000	9
B4DDK6;O14925;Q5SRD1	Mitochondrial import inner membrane translocase subunit Tim23;Putative mitochondrial import inner membrane translocase subunit Tim23B	TIMM23B;TIMM23	0	0	0	0	0	0	0	0	0	0	0	0	30454000	1	1	1	12.1	12.1	12.1	14.6	0	10.792	280300000	6
C9IYS1;H7C3D2;B4DEY6;Q9NZU5	LIM and cysteine-rich domains protein 1	LMCD1	0	0	0	0	0	0	0	0	0	0	0	0	25182000	1	1	1	8.2	8.2	8.2	26.125	0	14.611	282510000	12
B4DHE8;Q96DH6;B4DM51	RNA-binding protein Musashi homolog 2	MSI2	539830016	599849984	560400000	580259968	504320000	605270016	539350016	393180000	489849984	333569984	461849984	512480000	545990016	8	8	2	32.1	32.1	7.7	34.812	0	32.908	7096800000	71
B4DHR0;Q9H5N1	Rab GTPase-binding effector protein 2	RABEP2	0	0	28840000	0	0	0	0	0	0	0	0	0	0	4	4	4	8.6	8.6	8.6	56.112	0.00052219	4.2121	226500000	10
B4DIZ1;Q8TAM6;C9JN04;C9J6B4	Ermin	ERMN	165330000	185040000	113970000	0	0	0	232760000	161160000	0	122390000	0	89132000	0	6	6	6	25.4	25.4	25.4	30.476	0	13.902	1348600000	36
B4DJV2;O75390;A0A0C4DGI3	Citrate synthase;Citrate synthase, mitochondrial	CS	11681999872	9524299776	10033000448	8318499840	8356299776	9559300096	9181200384	9489099776	9506299904	7701300224	10138999808	10407000064	8873100288	24	24	23	61.6	61.6	59.6	50.431	0	323.31	139320000000	433
B4DJV5;Q13610	Periodic tryptophan protein 1 homolog	PWP1	0	0	0	0	0	0	0	0	0	34469000	0	0	0	1	1	1	2.5	2.5	2.5	49.038	0.0075321	2.1157	99045000	6
B4DK72;Q01064	Calcium/calmodulin-dependent 3,5-cyclic nucleotide phosphodiesterase 1B	PDE1B	1581299968	1229600000	1168000000	1307500032	989240000	1028499968	1341299968	1138499968	835100032	0	1134400000	1232899968	962339968	13	13	12	37	37	34.1	56.623	0	104.36	13276000000	70
B4DKD2;O75078	Disintegrin and metalloproteinase domain-containing protein 11	ADAM11	0	0	0	0	0	0	27539000	0	0	0	0	0	0	1	1	1	3.2	3.2	3.2	61.563	0.0097805	1.9429	30121000	2
B4DKF8;E5RJ29;Q9NYI0;A0A087X1Z0;A0A087WXD8	PH and SEC7 domain-containing protein 3	PSD3	805150016	863699968	719649984	889670016	480980000	756700032	618419968	632390016	517380000	491270016	691740032	742899968	484360000	16	16	16	37.5	37.5	37.5	42.465	0	120.79	9029000000	123
B4DKY1;P49589	Cysteine--tRNA ligase, cytoplasmic	CARS	512030016	598440000	632350016	613740032	628620032	437529984	526209984	485180000	523009984	576899968	564840000	600150016	602940032	28	28	28	43.3	43.3	43.3	84.277	0	159.1	7644700000	151
B4DLN1;P52815	39S ribosomal protein L12, mitochondrial	MRPL12	160600000	0	124690000	91861000	106930000	0	0	0	0	0	102220000	0	0	6	6	6	20.1	20.1	20.1	48.099	0	15.827	1092700000	23
H3BTT2;H3BUN7;B4DLN5;F5GXU7;Q9NRF2	SH2B adapter protein 1	SH2B1	0	0	0	0	0	0	0	0	0	0	23392000	0	0	1	1	1	21.9	21.9	21.9	12.706	0.0012148	3.1266	111280000	0
B4DLR8;P15559;H3BRK3;H3BNV2	NAD(P)H dehydrogenase [quinone] 1	NQO1	1766300032	661750016	1128899968	910720000	804320000	614049984	524510016	1225299968	1886200064	1057200000	552129984	686280000	1796099968	11	11	11	49.5	49.5	49.5	22.793	0	184.19	14082000000	125
B4DR12;K7EIM7;K7EPJ5;O60291;K7ERA1;K7EJN3;A0A3B3ISM3;Q96PX1	E3 ubiquitin-protein ligase MGRN1;RING finger protein 157	MGRN1;RNF157	0	0	0	0	0	0	1012100	0	0	0	0	0	0	2	2	2	8.1	8.1	8.1	36.181	0.00052288	4.2411	11576000	4
B4DR80;Q9Y6E0;H0Y630	Serine/threonine-protein kinase 24;Serine/threonine-protein kinase 24 36 kDa subunit;Serine/threonine-protein kinase 24 12 kDa subunit	STK24	473529984	290209984	0	314880000	410209984	0	336889984	333630016	398209984	237610000	410540000	389169984	342529984	13	13	8	38.8	38.8	28.2	45.835	0	25.989	4098700000	40
J3QS39;J3QTR3;F5H6Q2;F5GYU3;F5H2Z3;F5H265;B4DV12;F5H388;F5H747;F5GXK7;J3QKN0;Q5PY61;Q96C32;P62987;P62979;P0CG47;P0CG48;M0R1V7;Q49A90;M0R1M6;M0R2S1;A0A2R8Y422;J3QSA3;F5GZ39	Ubiquitin-60S ribosomal protein L40;Ubiquitin;60S ribosomal protein L40;Ubiquitin-40S ribosomal protein S27a;Ubiquitin;40S ribosomal protein S27a;Polyubiquitin-B;Ubiquitin;Polyubiquitin-C;Ubiquitin	UBB;RPS27A;UBC;UBA52	10584999936	13159000064	10366000128	9321600000	13959000064	13715000320	11635000320	18008999936	14366000128	12056000512	13788999680	14823999488	17059999744	5	5	5	50.5	50.5	50.5	10.469	0	179.01	182260000000	329
B4DWG0;O95199	RCC1 and BTB domain-containing protein 2	RCBTB2	0	0	0	83011000	0	0	0	0	0	0	0	0	0	3	3	3	7.6	7.6	7.6	60.974	0	13.106	347920000	8
B4DXZ6;P51114;E7EU85;E9PFF5	Fragile X mental retardation syndrome-related protein 1	FXR1	0	137330000	150410000	0	149320000	194870000	154750000	0	0	0	0	0	0	8	8	6	18.6	18.6	16	68.326	0	18.744	1465400000	33
B4DY09;Q12905	Interleukin enhancer-binding factor 2	ILF2	1961500032	1822300032	1428499968	1515699968	1786499968	1499600000	1461299968	1580099968	1604300032	1291399936	1781600000	1581100032	1335200000	18	18	18	68.8	68.8	68.8	38.91	0	174	21643000000	222
B4E0K5;Q16539;E7EX54;B5TY33	Mitogen-activated protein kinase 14	MAPK14	0	0	0	0	0	0	0	76034000	123960000	0	0	0	0	8	8	8	37.1	37.1	37.1	32.357	0	22.743	464050000	20
B4E0T2;P50542	Peroxisomal targeting signal 1 receptor	PEX5	0	38537000	0	0	0	0	0	0	0	0	0	0	0	4	4	4	10.8	10.8	10.8	73.182	0	9.3103	221320000	5
Q8NBY1;B4E0Y9;Q9P289;C9JDH9;C9J6L2;C9JCC0;C9J232;H7C279;O00506	Serine/threonine-protein kinase 26;Serine/threonine-protein kinase 25	STK26;STK25	0	0	0	0	0	0	19131000	0	0	0	0	0	0	6	1	1	15.1	3.8	3.8	43.867	0.0012098	3.0575	72234000	4
E7ETN3;B4E1Z4;P00751;A0A0G2JH38	Complement factor B;Complement factor B Ba fragment;Complement factor B Bb fragment	CFB	0	0	0	0	155090000	0	111460000	0	0	0	0	0	0	6	6	6	6.4	6.4	6.4	124.02	0	8.3738	404540000	11
B5MBZ0;Q9HC35	Echinoderm microtubule-associated protein-like 4	EML4	0	0	0	0	0	0	0	0	16322000	0	0	0	0	4	4	4	3.7	3.7	3.7	110.18	0.00098328	3.2947	95763000	10
B5MC35;B5MD16;B5MCA1;Q96G28	Cilia- and flagella-associated protein 36	CFAP36	0	0	0	0	0	0	0	0	0	0	0	0	23622000	1	1	1	6.9	6.9	6.9	24.971	0.0091884	1.9958	131160000	5
G5E9F5;B5MC53;B5MCF8;P39210	Protein Mpv17	MPV17	0	0	98196000	0	60433000	0	0	119110000	99560000	0	221410000	154190000	100630000	1	1	1	20.4	20.4	20.4	12.958	0	124.85	1148000000	20
B5MCA4;P16422	Epithelial cell adhesion molecule	EPCAM	0	0	0	0	0	0	0	0	0	37350000	0	0	0	1	1	1	4.7	4.7	4.7	37.893	0.0019011	2.8342	16800000	1
B5MCB4		MECP2	0	0	0	0	0	50961000	0	0	0	0	0	0	0	1	1	1	12.5	12.5	12.5	20.011	0.0041133	2.3963	45515000	2
B5MCD5;B5MBY2;Q9Y6T7	Diacylglycerol kinase;Diacylglycerol kinase beta	DGKB	197830000	191050000	128060000	217330000	153040000	148680000	181610000	125730000	152080000	142970000	129700000	142730000	107040000	10	10	10	22.5	22.5	22.5	89.626	0	45.786	1985700000	62
B5MCD7;O43759;A2A283;F8WCE4	Synaptogyrin-1	SYNGR1	481040000	493449984	517060000	447260000	539849984	413449984	571240000	476489984	379040000	0	517670016	443500000	459569984	3	3	3	20.1	20.1	20.1	18.465	0	16.154	6308000000	41
B5MCN0;Q8NHH9;C9JQQ5	Atlastin-2	ATL2	0	0	0	0	0	0	0	0	0	0	27641000	0	0	4	3	3	13.1	10.4	10.4	47.4	0.00028137	5.8266	138610000	10
B5MCS3;B5MCU6;B5MCQ6;E7ETT9;Q96DB2	Histone deacetylase 11	HDAC11	0	0	0	0	0	0	0	0	0	0	24754000	0	0	1	1	1	12.7	12.7	12.7	20.391	0.00029386	6.991	99701000	4
B5MCZ9;Q16769;C9JS14;A0A3B3IUD5	Glutaminyl-peptide cyclotransferase	QPCT	0	0	0	0	0	0	0	0	0	0	0	24193000	0	2	2	2	10.2	10.2	10.2	32.107	0	8.5035	228970000	10
B5MD17;J3KS05;P83916;K7ELA4;C9JWS9	Chromobox protein homolog 1	CBX1	0	124710000	66818000	78026000	0	108890000	0	0	0	0	0	92672000	0	4	3	3	43.5	33.9	33.9	19.325	0	139.47	1317200000	24
B5MDF5;P62826;J3KQE5;F5H018;H0YFC6	GTP-binding nuclear protein Ran	RAN	4949300224	5301700096	4192900096	4771100160	5333000192	4897299968	4839699968	5328699904	4463799808	5175499776	5626899968	5239199744	5434500096	10	10	10	41.6	41.6	41.6	26.224	0	323.31	66987000000	231
B5MDL5;P53778	Mitogen-activated protein kinase 12	MAPK12	0	0	0	0	0	0	0	38610000	64353000	0	0	0	0	1	1	1	6.9	6.9	6.9	31.836	0	34.133	411090000	14
Q99613;B5ME19	Eukaryotic translation initiation factor 3 subunit C;Eukaryotic translation initiation factor 3 subunit C-like protein	EIF3C;EIF3CL	562300032	479830016	352500000	469329984	527200000	394560000	434329984	522800000	460270016	472100000	497920000	453390016	443969984	24	24	24	33	33	33	105.34	0	88.746	6138900000	121
E7EW69;B5ME97;Q9P0V9;E7EX04	Septin-10	2010-09-01	604080000	366510016	607529984	491270016	546140032	568240000	656150016	557510016	647110016	560790016	599550016	357289984	690889984	14	13	13	49.6	45.3	45.3	52.145	0	220.6	7517900000	81
B5MED8;Q96PQ0	VPS10 domain-containing receptor SorCS2	SORCS2	0	100870000	128970000	0	184640000	82116000	0	98256000	146570000	0	124510000	126170000	144360000	13	13	13	15	15	15	110.59	0	28.745	1383700000	59
G3V195;B7WPE2;Q32P44;G3V1D0;H0Y3M3	Echinoderm microtubule-associated protein-like 3	EML3	0	0	0	0	0	0	0	0	55262000	0	0	0	0	4	4	4	7.7	7.7	7.7	73.281	0.0012201	3.1945	119440000	8
B7WPG3;C9IYN3;D6W592;Q8WVV9	Heterogeneous nuclear ribonucleoprotein L-like	HNRNPLL;HNRPLL	187120000	173050000	164520000	132120000	173350000	284329984	77891000	129130000	168320000	144990000	153180000	0	236930000	11	10	10	29.9	28.5	28.5	56.45	0	22.668	2154300000	55
B7WPJ3;Q8WTX7;F2Z3I9;H7C2U7;F2Z2C1;F8WD52;H7C1Q1	GATS-like protein 3	GATSL3	0	0	0	0	0	0	0	64783000	0	0	0	0	0	2	2	2	10.7	10.7	10.7	32.253	0.0012222	3.218	127530000	5
B7WPL0;Q9NVN3;H0YHS3	Synembryn-B	RIC8B	0	0	0	0	0	0	0	0	0	0	0	0	36833000	2	1	1	5.2	2.7	2.7	63.493	0.0055966	2.2148	43250000	1
F8W9A8;B7WPL9;Q6PFW1;A0A087WZV0;O43314	Inositol hexakisphosphate and diphosphoinositol-pentakisphosphate kinase 1;Inositol hexakisphosphate and diphosphoinositol-pentakisphosphate kinase 2	PPIP5K1;PPIP5K2	55920000	41985000	0	0	56919000	0	0	33289000	0	0	0	0	0	4	4	4	4.3	4.3	4.3	156.65	0.00028425	6.0567	347890000	20
B7Z278;Q8WZA2	Rap guanine nucleotide exchange factor 4	RAPGEF4	32678000	0	0	0	0	0	0	0	0	0	0	0	0	4	4	1	6.7	6.7	1.8	90.973	0.00027863	5.633	132320000	14
B7Z2R7;Q5T8D3;X6RDD7;Q5T8E0	Acyl-CoA-binding domain-containing protein 5	ACBD5	42528000	0	0	0	0	0	0	0	0	0	0	0	0	3	3	3	6.1	6.1	6.1	58.792	0.0012121	3.0834	167590000	15
B7Z2T4;E9PN83;F8VYC1;A0A3B3ISW2;A0A3B3ITF1;Q15700;E9PIW2;B5MCC5	Disks large homolog 2	DLG2	456680000	587849984	403929984	410940000	404129984	332289984	433760000	499800000	444790016	400350016	550419968	524670016	412240000	23	15	15	34.7	26.2	26.2	94.999	0	196.82	6155600000	83
F8W1R0;B7Z493;E9PJX4;F8VWL3;Q96M96	FYVE, RhoGEF and PH domain-containing protein 4	FGD4	100870000	0	0	0	0	0	0	0	0	0	0	0	0	8	8	8	15.6	15.6	15.6	76.691	0	13.333	400100000	20
H7C2W9;C9JU56;B7Z4E3;B7Z4C8;P62899	60S ribosomal protein L31	RPL31	0	0	0	0	0	0	0	0	0	0	0	0	54992000	1	1	1	13	13	13	12.701	0.0019057	2.86	721540000	13
F5GZ08;B7Z4G8;P51693;S4R3U6;K7EQJ4	Amyloid-like protein 1;C30	APLP1	132720000	79000000	137810000	74803000	140130000	91602000	107830000	83431000	0	0	0	118160000	82948000	4	4	4	9	9	9	68.49	0	14.532	1176500000	31
B7Z4M1	Reticulon	RTN3	635100032	858259968	565510016	625910016	585340032	518240000	741209984	0	309500000	271329984	408870016	317740000	394260000	2	1	1	43.9	12.2	12.2	12.747	0	34.014	6684400000	35
B7Z4W5;Q16773	Kynurenine--oxoglutarate transaminase 1	CCBL1	267420000	239900000	349580000	274769984	350929984	244800000	440080000	396000000	275500000	169820000	405020000	414969984	370120000	12	12	12	32.8	32.8	32.8	57.668	0	62.253	4504000000	92
B7Z524;H0YDX7;J3QT46;Q9Y450;H0YES5	HBS1-like protein	HBS1L	0	0	0	0	0	0	0	0	0	43508000	0	0	0	2	2	2	7.3	7.3	7.3	56.961	0	11.524	200160000	9
B7Z589;P48067	Transporter;Sodium- and chloride-dependent glycine transporter 1	SLC6A9	0	0	0	0	0	0	0	0	37366000	0	0	0	0	2	2	2	6.1	6.1	6.1	58.36	0.00027137	5.1195	187730000	8
B7Z5N5;Q15796;H3BVD1;K7EJX0;P84022;O15198	Mothers against decapentaplegic homolog;Mothers against decapentaplegic homolog 2;Mothers against decapentaplegic homolog 3;Mothers against decapentaplegic homolog 9	SMAD2;SMAD3;SMAD9	0	87993000	0	78112000	0	0	0	0	0	0	0	0	83117000	4	4	3	14.2	14.2	11.6	48.669	0	7.3558	609830000	15
B7Z613		GPM6B	1853900032	2321400064	2753600000	2505999872	2249900032	2070200064	2495500032	2075100032	2066200064	1406599936	1834800000	1582200064	2042700032	6	6	5	18.5	18.5	14.2	33.272	0	183.63	27908000000	76
B7Z7F3;Q9H6Z4	Ran-binding protein 3	RANBP3	97902000	112490000	0	0	0	0	0	99445000	73109000	110000000	74725000	0	0	7	7	7	20.9	20.9	20.9	52.894	0	39.571	699610000	25
B7Z9I1;Q5T4U5;P11310	Medium-chain specific acyl-CoA dehydrogenase, mitochondrial	ACADM	870790016	738470016	1048700032	1016600000	812449984	934649984	934990016	1270000000	1404000000	553209984	1128199936	1042899968	924800000	14	14	14	46.2	46.2	46.2	42.426	0	323.31	13465000000	126
B7ZC38;Q9NR46	Endophilin-B2	SH3GLB2	2124099968	1852400000	1786599936	1815800064	1914599936	1644499968	1871500032	1663500032	1468999936	1692600064	1389500032	1983900032	1880700032	16	16	1	45.2	45.2	6	44.361	0	213.19	23595000000	221
B7ZC39		SH3GLB2	50722000	0	0	0	0	0	0	0	0	0	0	0	0	16	1	1	46.3	4.3	4.3	41.668	0.001677	2.9261	50722000	3
B7ZKJ8;Q14624;H7C0L5	Inter-alpha-trypsin inhibitor heavy chain H4;70 kDa inter-alpha-trypsin inhibitor heavy chain H4;35 kDa inter-alpha-trypsin inhibitor heavy chain H4	ITIH4	124650000	126240000	108640000	0	176990000	0	121150000	102080000	0	181590000	135910000	0	125300000	11	11	10	15.2	15.2	14.1	103.88	0	38.906	1233000000	43
B7ZKW8;Q6JBY9	CapZ-interacting protein	RCSD1	0	0	0	0	0	0	0	0	0	0	26416000	0	0	1	1	1	4.1	4.1	4.1	41.261	0.0020969	2.6335	98847000	3
B7ZL14;Q96RU3;H0Y7W6	Formin-binding protein 1	FNBP1	48449000	74664000	71686000	46417000	0	0	0	0	100210000	61554000	0	0	92387000	7	7	7	14.2	14.2	14.2	64.071	0	41.185	664700000	30
B7ZLH2		LMX1B	0	68883000	0	0	0	0	0	0	0	0	0	0	0	1	1	1	8.6	8.6	8.6	42.572	0.0095861	1.956	75315000	1
Q5VT82;B7ZM79;Q9HC56	Protocadherin-9	PCDH9	62869000	76529000	0	0	83407000	81574000	0	63670000	0	0	0	0	0	7	7	7	9	9	9	113.71	0	11.383	569850000	22
C9JEL3;B9A044;B8ZZ50;O60573	Eukaryotic translation initiation factor 4E type 2	EIF4E2	0	0	80099000	0	0	0	0	0	0	0	0	0	0	2	2	2	17.4	17.4	17.4	24.602	0.0083388	2.0287	244890000	5
B8ZZF8;Q9Y4Y9	U6 snRNA-associated Sm-like protein LSm5	LSM5	0	0	0	0	0	0	0	0	0	0	0	0	33066000	1	1	1	29.7	29.7	29.7	7.0202	0	9.7855	315840000	15
B8ZZJ0;B9A032;B8ZZN6;P63165	Small ubiquitin-related modifier 1	SUMO1	0	0	0	0	0	0	0	0	0	0	0	46063000	0	1	1	1	27.6	27.6	27.6	6.6846	0.00027367	5.2776	453860000	9
B8ZZQ6;P06454;B8ZZA1;B8ZZW7;H7C2N1	Prothymosin alpha;Prothymosin alpha, N-terminally processed;Thymosin alpha-1	PTMA	97939000	0	0	52609000	119430000	0	0	0	53084000	78872000	0	35991000	0	4	4	4	35.5	35.5	35.5	11.758	0	23.627	612710000	27
B8ZZX2;B8ZZV9;Q9H8M1	Coenzyme Q-binding protein COQ10 homolog B, mitochondrial	COQ10B	0	0	0	0	0	0	0	0	0	0	48095000	0	0	2	2	1	14.4	14.4	9	21.337	0.00027925	5.6674	343840000	14
B8ZZW5;Q8NBF6;H7C0I1	Late secretory pathway protein AVL9 homolog	AVL9	102410000	83543000	0	0	88904000	0	114520000	94142000	0	0	94404000	103090000	0	10	10	10	17.1	17.1	17.1	69.8	0	32.754	984940000	36
B9ZVT1;Q8IXT5	RNA-binding protein 12B	RBM12B	48023000	50311000	0	0	0	43483000	0	59086000	60226000	0	58790000	48398000	54820000	3	3	3	4.2	4.2	4.2	102.7	0	7.3832	562820000	32
Q9NQA3;C4AMC7;Q6VEQ5;A8K0Z3	WAS protein family homolog 6;Putative WAS protein family homolog 3;WAS protein family homolog 2;WAS protein family homolog 1	WASH6P;WASH3P;WASH2P;WASH1	0	0	0	54952000	0	0	0	0	0	0	0	0	0	3	3	3	10.1	10.1	10.1	47.989	0.00027871	5.6372	155380000	7
C9IYL1;H7C0X2;Q6ZSS7	Major facilitator superfamily domain-containing protein 6	MFSD6	0	0	21164000	0	0	0	0	0	0	0	0	0	0	1	1	1	8.9	8.9	8.9	19.61	0.0036655	2.419	23782000	1
C9J069	Uncharacterized protein C9orf172	C9orf172	58775000	56599000	0	0	0	0	0	39851000	0	0	0	0	0	8	8	8	12.1	12.1	12.1	106.65	0	12.646	1232600000	23
C9J0G0;Q99424;C9JY29	Acyl-coenzyme A oxidase;Peroxisomal acyl-coenzyme A oxidase 2	ACOX2	0	0	0	0	0	0	0	0	0	0	0	15170000	0	4	4	4	7.3	7.3	7.3	75.141	0.0018846	2.7694	353690000	7
C9J0K6;P30626;B4DHQ6	Sorcin	SRI	7660599808	5893499904	8400699904	6915800064	6525000192	8354599936	7766700032	8097200128	8905400320	7126300160	7291500032	7720699904	8740599808	13	13	13	85.2	85.2	85.2	17.605	0	318.53	104390000000	282
F8WCD5;C9JPV7;C9JXQ0;C9J0V6;C9JHT0;C9JRZ2;C9JHW1;E7ESB6;I1E4Y6;Q6Y7W6	PERQ amino acid-rich with GYF domain-containing protein 2	GIGYF2	0	0	34131000	0	0	0	0	0	0	0	0	0	0	3	3	3	55.4	55.4	55.4	10.429	0	12.902	101900000	5
E7EW28;C9J240;Q6U841;F8WDX9	Anion exchange protein;Sodium-driven chloride bicarbonate exchanger	SLC4A10	0	0	36753000	0	0	0	0	0	0	0	0	0	0	5	4	4	5.9	5	5	118.84	0.00027352	5.2707	93290000	6
C9J2C0;Q9NY65	Tubulin alpha-8 chain	TUBA8	2970700032	2538099968	1803200000	2207800064	1969699968	2640100096	2077500032	1431900032	2951000064	1920099968	3162099968	1795900032	1766200064	29	9	9	64.5	28.3	28.3	51.984	0	323.31	34352000000	215
C9J2Q2;Q8N5M1	ATP synthase mitochondrial F1 complex assembly factor 2	ATPAF2	94380000	92489000	100200000	70903000	0	64750000	88347000	0	160840000	0	0	140270000	96578000	5	5	5	38.5	38.5	38.5	23.152	0	12.418	1078000000	30
C9J3E7;E5RJ75;E5RFE1		DYNC1I1	0	0	0	0	0	0	0	0	0	0	0	0	50621000	4	1	1	52.6	23.3	23.3	13.091	0	18.056	125660000	7
C9J3F6;Q92609	TBC1 domain family member 5	TBC1D5	0	0	0	0	0	16999000	0	0	0	0	0	0	0	3	3	3	7.4	7.4	7.4	67.534	0	7.8066	107140000	12
C9JRH2;C9J3R0;C9JMJ4;C9JQZ4;C9JW69;P18754	Regulator of chromosome condensation	RCC1	0	0	53778000	0	0	0	0	0	0	0	0	51246000	39645000	3	3	3	15.2	15.2	15.2	24.465	0.0012174	3.1705	382650000	17
C9J406;H7C463		IMMT	252070000	206220000	0	213610000	0	0	0	0	116610000	224440000	0	93523000	121110000	37	2	0	65.3	8	0	73.253	0	31.325	1388800000	22
C9J494;Q9H000	Probable E3 ubiquitin-protein ligase makorin-2	MKRN2	0	0	72288000	0	0	0	0	0	0	0	0	0	0	3	3	3	7.2	7.2	7.2	46.68	0.0093886	1.9854	152240000	8
C9J4L5;C9JBT4;H7C3I0;E7EWP8;C9J896;P16220	Cyclic AMP-responsive element-binding protein 1	CREB1	0	0	0	0	0	0	0	0	0	0	0	0	15923000	1	1	1	10.7	10.7	10.7	14.082	0.0027714	2.5224	47679000	2
C9J5D1;E7EQ69;Q9GZZ1;C9JZU6;A0A087WWJ2;F8WCK0;C9J5J3;A0A0D9SF32	N-alpha-acetyltransferase 50	NAA50	0	0	0	0	0	0	0	0	0	0	0	0	39407000	4	4	4	36.4	36.4	36.4	14.886	0.00051243	3.8771	272910000	10
C9J5H8		NCDN	0	0	0	0	0	0	0	0	0	0	0	0	97714000	12	1	1	63.1	5.7	5.7	26.367	0.00052798	4.4409	680710000	6
C9J5N1;Q9BTE6	Alanyl-tRNA editing protein Aarsd1	PTGES3L-AARSD1;AARSD1	151570000	142680000	148900000	0	0	131030000	127430000	174080000	123240000	110060000	161390000	149610000	140970000	7	7	7	20	20	20	55.065	0	19.341	1653900000	51
C9J5P6;P29475	Nitric oxide synthase;Nitric oxide synthase, brain	NOS1	826470016	1008899968	957420032	802529984	577649984	951580032	764070016	750860032	416430016	653900032	753020032	778030016	629129984	39	39	39	36.7	36.7	36.7	161.02	0	169.98	10315000000	238
C9J652;Q2M1Z3	Rho GTPase-activating protein 31	ARHGAP31	0	0	0	0	0	0	0	0	0	0	10151000	0	0	1	1	1	7.3	7.3	7.3	18.79	0.0077468	2.1048	22955000	2
C9J695;Q6ICL3;C9JDT9;A0A0A0MSI5	Transport and Golgi organization protein 2 homolog	TANGO2	0	0	74157000	0	71194000	0	0	0	0	0	0	0	0	5	5	5	34.1	34.1	34.1	25.172	0	13.317	641770000	18
F5GXT2;O43374;C9J798;F8W6L0;E7ERK1	Ras GTPase-activating protein 4;Putative Ras GTPase-activating protein 4B	RASA4B;RASA4	0	0	0	0	0	0	0	0	0	0	0	0	84961000	4	4	4	6.3	6.3	6.3	85.357	0.00074944	3.5057	114780000	7
C9J8T6;Q14061	Cytochrome c oxidase copper chaperone	COX17	0	0	0	0	0	0	0	44546000	0	0	0	0	0	1	1	1	16.3	16.3	16.3	10.853	0	12.189	206230000	8
C9JA33		PALM2	0	0	0	29114000	0	0	0	0	0	0	0	0	0	5	5	0	15.1	15.1	0	41.924	0.00028514	6.1203	181120000	8
C9JA93		TBC1D15	0	0	0	0	0	0	0	0	0	0	0	76040000	0	6	1	1	28.4	7.2	7.2	32.136	0.00052994	4.5302	215250000	10
C9JAI6;Q96DZ9	CKLF-like MARVEL transmembrane domain-containing protein 5	CMTM5	0	0	0	0	0	0	0	0	0	0	44176000	0	0	1	1	1	16.1	16.1	16.1	13.238	0.0016762	2.924	142660000	4
C9JAW5;C9JNU6;Q9Y241	HIG1 domain family member 1A, mitochondrial	HIGD1A	139270000	0	0	0	0	105160000	159220000	0	0	0	257410000	250040000	276310016	3	3	3	59	59	59	8.8131	0	73.46	1654700000	26
C9JBI3;P78330	Phosphoserine phosphatase	PSPH	164990000	168310000	175130000	0	236770000	140500000	163240000	175240000	173340000	0	191420000	190750000	207520000	7	7	7	40.1	40.1	40.1	20.745	0	10.211	2299900000	30
C9JEU5;C9JC84;P02679	Fibrinogen gamma chain	FGG	1969799936	3183200000	2232000000	5691200000	4553099776	1213900032	3544900096	1801100032	1836600064	3579800064	3253900032	1303399936	3348499968	19	19	19	52.6	52.6	52.6	50.322	0	323.31	38258000000	273
E9PNC7;E9PQX9;C9JCC6;Q14919	Dr1-associated corepressor	DRAP1	0	0	0	0	0	0	0	0	0	0	0	67939000	0	3	3	3	14.8	14.8	14.8	16.561	0.00098936	3.3811	325720000	14
C9JRA9;C9JCM6;C9JUD2;C9JWU9;C9JSW2;C9JW74;Q5EB52	Mesoderm-specific transcript homolog protein	MEST	0	0	0	0	0	0	10949000	0	0	0	0	0	0	1	1	1	11.9	11.9	11.9	18.537	0.0012074	3.0333	46646000	2
C9JPK3;C9K0E4;C9JCY1;C9JQS3;E9PFI2;Q9Y2K9	Syntaxin-binding protein 5-like	STXBP5L	40211000	0	0	0	0	0	0	0	0	0	28125000	0	0	4	3	3	4.8	4	4	111.74	0	8.7422	178730000	11
C9JDZ2;Q9NVQ4	Fas apoptotic inhibitory molecule 1	FAIM	0	0	0	0	0	0	0	0	0	16698000	0	0	0	2	2	2	21.9	21.9	21.9	14.661	0	9.8369	112730000	7
C9JE82;C9JVC9;Q9NY47	Voltage-dependent calcium channel subunit alpha-2/delta-2;Voltage-dependent calcium channel subunit alpha-2-2;Voltage-dependent calcium channel subunit delta-2	CACNA2D2	114180000	97003000	120340000	116860000	118990000	103110000	120940000	0	0	0	0	0	112400000	14	12	12	14.8	13.1	13.1	129.21	0	41.821	1359600000	45
C9JG97;C9JEH3;Q13685;H7C0R2;C9JTS3	Angio-associated migratory cell protein	AAMP	0	66492000	0	55760000	59215000	86317000	78445000	52714000	42333000	67479000	54875000	45548000	52111000	4	4	4	12.3	12.3	12.3	44.693	0	12.477	777460000	32
C9JEJ2;P49585;C9J050;Q9Y5K3;H7C1T3	Choline-phosphate cytidylyltransferase A;Choline-phosphate cytidylyltransferase B	PCYT1A;PCYT1B	0	86333000	110350000	110100000	95956000	101580000	81223000	105560000	136750000	0	0	90780000	97313000	6	6	6	25	25	25	43.263	0	14.502	1150100000	44
C9JEX3;Q13614	Myotubularin-related protein 2	MTMR2	23838000	0	0	0	0	0	0	0	0	0	0	0	0	2	2	2	3.1	3.1	3.1	64.49	0.0091904	1.9969	36700000	6
C9JF17;P05090	Apolipoprotein D	APOD	830529984	1482899968	3545600000	1560899968	1351900032	1708499968	1875500032	1574499968	1489900032	2010700032	1863299968	893030016	2254799872	8	8	8	30.7	30.7	30.7	24.158	0	89.154	23924000000	124
C9JFE4;Q13098;A0A096LP07;A0A096LPJ3;A8K070;J3KSA5	COP9 signalosome complex subunit 1	GPS1	992910016	1078899968	985800000	999939968	984289984	1132899968	892440000	1082200064	887160000	958350016	1031100032	957160000	916540032	14	14	14	39.3	39.3	39.3	53.371	0	197.95	13341000000	158
C9JFR7;P99999	Cytochrome c	CYCS	6630000128	5822400000	5007300096	3755699968	3597900032	4623200256	4498200064	4448399872	5473099776	2371099904	5716400128	4972100096	4162700032	8	8	7	59.4	59.4	48.5	11.333	0	181.36	67828000000	229
C9JFZ1;J3KQV8;O43426;J3KPK1;A0A0D9SGJ6;C9JW66	Synaptojanin-1	SYNJ1	3013900032	2811300096	1852199936	2467200000	2282599936	2193200128	2400999936	2009600000	1570700032	2006899968	1957600000	2471899904	1686200064	43	43	43	42.4	42.4	42.4	149.3	0	323.31	29489000000	361
C9JG87;Q9NYK5	39S ribosomal protein L39, mitochondrial	MRPL39	0	62831000	0	0	0	0	0	0	42932000	0	0	36843000	0	5	5	5	15.5	15.5	15.5	34.032	0.00027005	5.001	380320000	19
F5GZZ9;C9JHR8;Q86VB7	Scavenger receptor cysteine-rich type 1 protein M130;Soluble CD163	CD163	0	0	290060000	783110016	0	0	0	178430000	0	0	131200000	0	0	13	13	13	18	18	18	120.32	0	54.987	1490000000	28
C9JIF9;P13798;H7C393	Acylamino-acid-releasing enzyme	APEH	1362000000	1204999936	1147000064	1464099968	1393400064	1310000000	1327500032	1458899968	1223800064	1758499968	1220499968	1292700032	1402300032	20	20	20	41.7	41.7	41.7	81.673	0	241.43	18009000000	241
C9JJN9;Q8N3P4	Vacuolar protein sorting-associated protein 8 homolog	VPS8	0	35913000	0	0	0	0	0	0	0	0	0	0	0	5	5	5	4.4	4.4	4.4	161.8	0.00028011	5.714	160430000	11
C9JJT5;C9JU26;G3V325;P56134	ATP synthase subunit f, mitochondrial	ATP5J2-PTCD1;ATP5J2	634350016	490040000	558249984	363120000	271000000	497020000	470150016	784369984	870049984	462249984	919640000	730360000	584460032	2	2	2	44.4	44.4	44.4	5.9149	0	9.4291	9482600000	72
C9JJX6;E9PDC3;O00192	Armadillo repeat protein deleted in velo-cardio-facial syndrome	ARVCF	219150000	195380000	221760000	183960000	208250000	198330000	221090000	228530000	303209984	220570000	238170000	222920000	276889984	19	19	19	33.8	33.8	33.8	96.827	0	57.122	3076300000	103
C9JL73;P15313;C9JNS9	V-type proton ATPase subunit B, kidney isoform	ATP6V1B1	0	0	0	0	0	0	0	413209984	0	0	0	241690000	0	9	2	2	22.8	2.4	2.4	55.08	0.00075094	3.5226	1629400000	8
C9JLF4;Q9NVH0	Exonuclease 3-5 domain-containing protein 2	EXD2	0	0	0	0	0	0	0	0	0	0	0	0	8654500	1	1	1	11.4	11.4	11.4	12.421	0.0034443	2.4435	160920000	11
C9JLU1;P52434	DNA-directed RNA polymerases I, II, and III subunit RPABC3	POLR2H	0	0	0	0	0	0	0	0	0	0	48084000	0	0	4	4	4	32.4	32.4	32.4	16.925	0.00029189	6.8247	337010000	7
C9JME2;Q9Y4F1	FERM, RhoGEF and pleckstrin domain-containing protein 1	FARP1	1148700032	1388499968	1424400000	1393200000	1080400000	1015200000	1540199936	878600000	1131800064	990110016	1093100032	1225500032	841590016	30	30	12	35.5	35.5	12.7	122.09	0	238.73	15868000000	219
C9JNZ1;C9JVG3;C9JWG0;C9JQU9;C9JUW1;C9JTZ5;F2Z3H1		UGP2	0	0	0	0	0	0	0	0	0	0	0	0	99548000	12	1	1	61.8	6.1	6.1	24.235	0	22.023	1320700000	18
C9JPI5;H0Y5B5;E7EVG2;Q86U86	Protein polybromo-1	PBRM1	0	0	0	0	0	0	0	0	0	0	4052300	0	0	1	1	1	8.3	8.3	8.3	26.402	0.0014444	2.9994	11111000	2
C9JQ00		TUBA4A	197790000	409129984	235540000	321460000	297630016	0	371200000	0	0	0	0	0	0	13	2	2	80	17.2	17.2	19.808	0	53.184	2049500000	20
C9JQD4;O43447;H0YEL5	Peptidyl-prolyl cis-trans isomerase;Peptidyl-prolyl cis-trans isomerase H	PPIH	65963000	55679000	53500000	0	70464000	164370000	49945000	64556000	52438000	0	71535000	26821000	72806000	4	4	4	29.2	29.2	29.2	15.8	0.00028986	6.7439	849060000	39
E9PDR0;C9JQS9;P05166;E7EX59;E7ETT1;E7ETT4;E7EUY3;F8WBI9;E9PEC3;E7ENC1	Propionyl-CoA carboxylase beta chain, mitochondrial	PCCB	844809984	670800000	862640000	674689984	660689984	765760000	750489984	654809984	589660032	626019968	705180032	641980032	551609984	20	20	20	53.5	53.5	53.5	59.403	0	139.35	9179200000	157
C9JRL4		MDH1	157740000	213610000	0	0	0	60892000	354920000	30707000	187210000	0	241230000	771560000	0	8	1	1	68.9	16.8	16.8	12.973	0	63.272	3263600000	45
C9JRZ6;Q9NX63;F8WAR4;A0A286YEX5	MICOS complex subunit MIC19	CHCHD3	1047400000	1327600000	1159699968	1150000000	906169984	1026300032	932169984	704169984	632720000	397670016	801870016	793400000	772700032	9	9	9	28.9	28.9	28.9	26.753	0	71.926	12196000000	107
C9JSN8;P12314;A0A087WVS4;A0A087WUG7;A0A087WXZ6;A0A0A0MRM3;Q92637	High affinity immunoglobulin gamma Fc receptor I;High affinity immunoglobulin gamma Fc receptor IB	FCGR1A;FCGR1B	0	0	0	40006000	0	0	0	0	0	0	0	0	0	2	2	2	8.3	8.3	8.3	27.571	0.0018984	2.8268	85978000	3
C9JTE0;Q16653;A0A0G2JHM8;Q5SSB8;A0A0G2JIQ0;A0A0G2JHB7;A0A140T9L1;A0A0G2JJE4;A0A0G2JI49;A0A0G2JIU9;A0A0G2JHA9;A0A0G2JKI0	Myelin-oligodendrocyte glycoprotein	MOG	756129984	835769984	1332899968	720969984	846579968	644230016	1702800000	759310016	645320000	1076099968	1483299968	544140032	1198200064	12	12	12	39.7	39.7	39.7	23.868	0	226.7	13089000000	103
C9JTE9;Q9UHQ4;C9IYK6;H7C5E2;C9JGJ9;F8WB99;B7Z2L0;H0Y7N8	B-cell receptor-associated protein 29	BCAP29	0	0	77023000	109510000	56518000	0	86461000	0	0	0	0	0	0	6	6	6	29.6	29.6	29.6	26.953	0	7.3844	422990000	16
C9JTN7;F8W8I6;P31483;H7BY49;E5RGV5;E5RG67	Nucleolysin TIA-1 isoform p40	TIA1	0	0	0	0	0	0	0	15919000	19948000	0	0	0	0	6	2	2	29.5	9.8	9.8	31.624	0	9.1526	89291000	13
H3BTP4;H3BQ59;C9JTU8;E9PFW9;Q9Y602;J3KPG9;Q9Y600	Cysteine sulfinic acid decarboxylase	CSAD	0	0	0	0	0	0	0	0	14818000	0	0	0	0	1	1	1	13.2	13.2	13.2	14.377	0.0062236	2.1461	46034000	2
C9JU35;Q9NPL8;C9JR82	Complex I assembly factor TIMMDC1, mitochondrial	TIMMDC1	0	0	0	0	0	0	0	0	0	0	0	0	7581900	2	2	2	12.6	12.6	12.6	17.459	0.0066489	2.1337	27035000	8
C9JV77;P02765	Alpha-2-HS-glycoprotein;Alpha-2-HS-glycoprotein chain A;Alpha-2-HS-glycoprotein chain B	AHSG	0	110600000	115570000	176520000	403580000	0	84572000	0	0	0	0	0	0	4	4	4	19.8	19.8	19.8	39.411	0	71.447	1160500000	19
C9JVE2;Q96GG9	DCN1-like protein;DCN1-like protein 1	DCUN1D1	213510000	190430000	185980000	217390000	183900000	205060000	220160000	212060000	196980000	185060000	206560000	192660000	204800000	5	5	5	20.1	20.1	20.1	28.305	0	33.364	2671200000	51
C9JVN9;Q9H9P8	L-2-hydroxyglutarate dehydrogenase, mitochondrial	L2HGDH	101480000	58022000	79825000	69877000	77399000	78893000	64074000	0	0	0	0	94256000	0	6	6	6	20	20	20	48.475	0	10.521	893640000	46
C9JWV4;G5E9Q8;Q9H9Q4	Non-homologous end-joining factor 1	NHEJ1	0	0	0	0	0	0	0	0	0	0	0	65068000	0	1	1	1	9.2	9.2	9.2	25.946	0	8.4195	364040000	7
F8WF50;F8WDC7;C9JXM3;Q5HYI8	Rab-like protein 3	RABL3	0	0	0	0	0	0	0	0	76371000	0	0	0	0	3	3	3	30.2	30.2	30.2	14.052	0.0020925	2.6044	160080000	5
C9JY26;Q9BZG1;C9JBG0;Q96PJ7;E7ES60	Ras-related protein Rab-34	RAB34	0	0	0	0	0	7426600	0	0	0	0	0	0	0	3	3	3	15.1	15.1	15.1	28.818	0.0045403	2.3438	66188000	5
C9JY79;Q9H254;M0QZQ3	Spectrin beta chain, non-erythrocytic 4	SPTBN4	92365000	94804000	0	100090000	95869000	0	107870000	0	0	93836000	104770000	117770000	0	19	14	14	8.7	7.1	7.1	289.06	0	33.144	1157700000	48
C9JYN0		SYPL1	0	0	0	0	210350000	0	0	284840000	298070016	0	183860000	185020000	185390000	3	3	3	12.9	12.9	12.9	24.784	0	11.561	2219300000	38
C9JYY6;Q92823;F8W775;A0A087X2B3	Neuronal cell adhesion molecule	NRCAM	5015900160	5234500096	4644899840	4916800000	5097500160	4219300096	5287699968	4518700032	5257600000	5405100032	4232900096	5387299840	4778500096	43	43	43	50.9	50.9	50.9	133.81	0	323.31	65554000000	446
C9JZB0;Q9BT40	Inositol polyphosphate 5-phosphatase K	INPP5K	0	0	0	0	0	0	0	0	0	0	121760000	0	0	3	3	3	11.8	11.8	11.8	26.723	0.001893	2.8036	246810000	10
H7C4M9;C9JZG9;C9JZY6;P62256	Ubiquitin-conjugating enzyme E2 H	UBE2H	0	0	0	115880000	79103000	135530000	81768000	0	0	0	69727000	0	0	3	3	3	64.5	64.5	64.5	7.0801	0.00028153	5.8345	712520000	17
C9JZR2;O60716	Catenin delta-1	CTNND1	680950016	592070016	641689984	720409984	699449984	608920000	634729984	697699968	664489984	568870016	639160000	666550016	745779968	23	23	23	34.9	34.9	34.9	104.85	0	261.63	8934800000	179
D3DPN2;O75056	Syndecan;Syndecan-3	SDC3	0	0	0	120010000	0	0	0	182750000	164820000	0	0	0	0	1	1	1	5.7	5.7	5.7	39.635	0	44.335	731540000	15
D3DQV9;H0Y3P2;P78344	Eukaryotic translation initiation factor 4 gamma 2	EIF4G2	488689984	492030016	447590016	500769984	491160000	531449984	493470016	537510016	418230016	499609984	471809984	492460000	468710016	23	23	23	31.6	31.6	31.6	102.33	0	266.05	6537300000	156
D3DSM0	Integrin beta	ITGB2	0	0	100610000	128330000	0	0	75837000	0	0	0	0	0	82949000	5	5	1	9.1	9.1	2.5	78.354	0	9.2384	685860000	19
D3DTX6;Q96SB3	Neurabin-2	PPP1R9B	457670016	409680000	371420000	393940000	345080000	372270016	348409984	334800000	316289984	0	378329984	0	278089984	14	14	13	20.6	20.6	19.3	89.333	0	56.783	4455100000	84
F6U1T9;D3YTA9;P63098;H7BYZ3	Calcineurin subunit B type 1	PPP3R1	630870016	577470016	460700000	437449984	433049984	444009984	459780000	444340000	427180000	524510016	602809984	539529984	454510016	11	11	11	71.9	71.9	71.9	18.208	0	64.499	6503100000	75
D4Q8H0;C9J3F7;Q9NYL2	Mitogen-activated protein kinase kinase kinase MLT	pk;ZAK	0	0	0	0	0	0	43656000	0	0	0	0	29637000	0	3	3	3	8.4	8.4	8.4	51.582	0.00027375	5.2923	164840000	15
D6R938;Q13557	Calcium/calmodulin-dependent protein kinase type II subunit delta	CAMK2D	0	0	0	0	0	0	0	0	0	0	0	0	99365000	22	1	1	58.6	6	6	56.298	0.0019025	2.843	678160000	10
D6R9H7;E7EQ97;E7EPU7;P05496;Q06055;P48201	ATP synthase F(0) complex subunit C1, mitochondrial;ATP synthase F(0) complex subunit C2, mitochondrial;ATP synthase F(0) complex subunit C3, mitochondrial	ATP5G1;ATP5G2;ATP5G3	0	0	0	0	0	0	0	0	0	0	7720200	0	0	1	1	1	31.3	31.3	31.3	10.195	0.0025439	2.5374	26072000	4
D6R9P3;D6RD18;D6RBZ0;Q99729	Heterogeneous nuclear ribonucleoprotein A/B	HNRNPAB	507080000	643489984	549209984	575129984	519800000	499369984	495220000	555299968	431540000	506020000	512180000	628460032	417030016	10	10	10	30	30	30	30.302	0	67.131	7049700000	85
D6RFM7;D6RAP6;Q9UJX5	Anaphase-promoting complex subunit 4	ANAPC4	0	0	0	9642500	0	0	0	0	0	0	0	0	0	1	1	1	19.3	19.3	19.3	9.7085	0.0012258	3.2587	16347000	2
D6RAS9;O14827	Ras-specific guanine nucleotide-releasing factor 2	RASGRF2	0	0	0	0	0	0	0	0	0	0	0	0	0	1	1	1	1	1	1	130.7	0.0009828	3.286	0	1
D6RG13;D6RAT0;P61247;D6RB09;D6RAS7;D6R9B6;H0Y8L7;E9PFI5;H0Y9Y4;D6RED7	40S ribosomal protein S3a	RPS3A	283320000	0	286950016	293710016	0	282260000	342369984	0	0	0	166170000	0	0	8	8	8	42.6	42.6	42.6	25.608	0	12.91	2714100000	42
D6RB81;Q9UHK6	Alpha-methylacyl-CoA racemase	AMACR	0	0	0	0	0	0	0	0	58176000	0	0	0	0	3	3	3	11.4	11.4	11.4	40.674	0.00052452	4.3008	115670000	4
D6RBV2;Q12907;D6RIU4;D6RDX1;D6RBH1	Vesicular integral-membrane protein VIP36	LMAN2	59640000	0	0	69190000	0	0	0	0	47599000	0	0	0	0	4	4	4	19.1	19.1	19.1	36.543	0.00028035	5.7408	490240000	14
D6RC04;Q9Y6G5;D6RJ90	COMM domain-containing protein 10	COMMD10	0	0	0	0	0	0	0	0	0	0	0	0	28125000	3	3	3	28.1	28.1	28.1	15.911	0.0018975	2.8242	285020000	13
D6RC65;D6RBA8		CTNND2	0	0	0	0	0	0	0	0	0	0	0	0	60026000	4	1	1	29.2	5.7	5.7	22.666	0.0083516	2.044	123110000	6
D6RCC4;D6RCC9;Q8NEC7;D6R9W2	Glutathione S-transferase C-terminal domain-containing protein	GSTCD	0	0	0	0	0	0	0	8707600	0	0	0	0	0	2	2	2	14.5	14.5	14.5	18.999	0.0027726	2.5264	34407000	7
D6RCD0;Q8NBQ5	Estradiol 17-beta-dehydrogenase 11	HSD17B11	0	0	0	0	0	0	0	230100000	0	0	0	0	0	4	4	4	17.2	17.2	17.2	28.102	0.00028019	5.7195	261390000	8
E5RIJ3;D6RCM8;O95379	Tumor necrosis factor alpha-induced protein 8	TNFAIP8	0	0	0	0	0	0	0	0	0	0	50964000	0	0	1	1	1	29.4	29.4	29.4	7.935	0	45.146	163410000	6
D6RHJ6;D6RD17;P01591;C9JA05	Immunoglobulin J chain	JCHAIN;IGJ	0	0	49142000	0	133130000	0	0	0	0	0	0	0	0	3	3	3	19.1	19.1	19.1	17.679	0.0002694	4.9299	242900000	9
D6RE00;Q9NYF3	Protein FAM53C	FAM53C	0	0	0	0	0	2199700	0	0	0	0	0	0	0	1	1	1	9.6	9.6	9.6	12.323	0.0095923	1.9612	6298500	2
D6REB4;Q9H074	Polyadenylate-binding protein-interacting protein 1	PAIP1	0	171070000	0	186090000	144580000	145430000	179190000	0	160790000	0	0	121190000	0	4	4	4	17.1	17.1	17.1	39.908	0	9.7929	1630400000	30
D6RGI3;D6RER5;Q9NVA2;D6RDU5;H0Y961	Septin-11	2011-09-01	12536999936	12264999936	13537000448	12912000000	11137000448	13361999872	11854000128	11729000448	11159000064	11397000192	12069000192	11280000000	12000000000	28	25	11	65.2	57.2	25.2	49.005	0	323.31	163200000000	465
D6REX3;O94979;D6RHZ5;H7BXG7;H0YAB3	Protein transport protein Sec31A	SEC31A	366350016	387440000	352480000	387289984	456300000	366670016	375350016	510860000	380169984	261190000	374409984	184790000	462409984	21	21	21	21	21	21	136.22	0	141.36	5130800000	127
D6RF35;P02774;D6RBJ7	Vitamin D-binding protein	GC	124270000	171060000	107360000	0	820830016	0	0	86447000	146810000	204850000	350369984	327129984	274080000	12	12	11	34	34	29.4	53.02	0	126.15	3129900000	44
D6RF48;Q9P2W9;D6RC71	Syntaxin-18	STX18	0	0	0	0	0	0	0	0	0	0	0	2112600	0	2	2	2	6.8	6.8	6.8	35.42	0.0091864	1.9948	2334900	3
D6RFN0;Q9BT78;D6RAX7;D6RD63	COP9 signalosome complex subunit 4	COPS4	1518400000	1485699968	1291500032	1476600064	1495399936	1624999936	1476400000	1631800064	1460700032	1473699968	1389500032	1510599936	1547399936	21	21	21	61	61	61	49.684	0	117.39	19757000000	198
D6RGX2;Q9NUQ7;H0YA18	Ufm1-specific protease 2	UFSP2	0	0	100710000	0	0	0	0	106520000	0	0	108910000	76536000	97078000	9	9	9	35.1	35.1	35.1	44.162	0	10.709	755440000	30
D6RHZ7		RAP1GDS1	0	0	0	0	0	0	0	0	0	0	0	0	146010000	6	1	1	54.1	22.1	22.1	13.225	0	35.665	1917000000	13
D6RI11;O14810;D6RAG3	Complexin-1	CPLX1	0	0	0	0	75435000	0	0	0	0	0	0	0	0	3	3	3	39.8	39.8	39.8	12.525	0	82.584	372690000	7
E9PCZ3;D6RJC3;E7EQN9;O15327;E9PG59;E9PHC0	Type II inositol 3,4-bisphosphate 4-phosphatase	INPP4B	0	0	0	0	22382000	0	0	0	0	0	0	0	0	2	2	2	3.8	3.8	3.8	78.154	0.0012095	3.0544	112480000	7
E3W994;J3KR49;O75122	CLIP-associating protein 2	CLASP2	0	0	0	0	0	0	0	48129000	0	0	0	0	0	40	1	1	41.2	1.3	1.3	138.86	0.00075453	3.6039	98508000	3
E5KLJ9;A0A2R8YFD1		OPA1	0	0	0	0	0	0	0	0	0	0	0	0	32665000	46	1	0	52.5	1.3	0	113.68	0.0020955	2.6278	208450000	8
E5RFP6;E5RK27		VDAC3	0	163730000	147190000	149480000	0	0	128520000	0	0	0	0	0	149720000	7	1	1	53	14.9	14.9	14.672	0	194.79	1474700000	24
H0YBX2;G5EA19;U3KQS5;E5RG17;Q6P1N9;E5RG62;E5RK70;E5RGF2;A0A0D9SGD3	Putative deoxyribonuclease TATDN1	TATDN1	0	0	0	0	0	0	0	0	0	0	0	0	67491000	3	3	3	16.3	16.3	16.3	22.558	0.00051086	3.807	389410000	10
E5RG91;Q8NEZ2	Vacuolar protein sorting-associated protein 37A	VPS37A	0	0	0	0	0	56616000	0	69600000	0	42942000	0	0	0	3	3	3	12	12	12	35.047	0.0012273	3.2648	208990000	18
E5RGN3;E5RIM7;O00244	Copper transport protein ATOX1	ATOX1	0	0	0	0	0	0	0	0	91476000	0	0	0	0	4	4	4	45.8	45.8	45.8	6.3304	0.0021028	2.6491	301400000	6
E5RGS5;E5RGQ3;Q9H446;E5RJE3	RWD domain-containing protein 1	RWDD1	0	0	0	0	0	0	0	0	86857000	0	0	0	0	2	2	2	38.8	38.8	38.8	7.935	0.0018832	2.769	204240000	7
E5RGS4;O60925	Prefoldin subunit 1	PFDN1	0	0	125290000	0	0	112720000	0	0	0	0	0	0	91305000	3	3	3	26.5	26.5	26.5	13.466	0.0002809	5.795	1082900000	12
E5RGX5;Q93045	Stathmin;Stathmin-2	STMN2	0	421670016	275230016	351040000	0	0	352409984	280360000	0	0	407540000	298750016	313460000	3	2	2	17.3	11.9	11.9	19.574	0	11.816	3800300000	24
E5RHG8;Q15369;R4GMY8	Transcription elongation factor B polypeptide 1	TCEB1	351910016	320769984	401980000	256110000	0	366569984	394470016	290500000	293440000	0	323840000	303620000	430860000	4	4	4	61.8	61.8	61.8	9.9601	0	105.71	4253100000	47
E5RI99;P62888;A0A0B4J213	60S ribosomal protein L30	RPL30	249610000	270600000	253840000	271240000	190340000	0	0	265010000	257670000	244910000	242920000	0	234570000	3	3	3	41.2	41.2	41.2	12.656	0	35.023	2753800000	29
E5RIC9		GYG2	0	0	0	0	0	0	0	0	0	0	0	0	11021000	3	1	1	38	20.4	20.4	15.353	0	22.694	94353000	5
E5RIW3;E5RJD8;O75347;E5RHG6	Tubulin-specific chaperone A	TBCA	781230016	546110016	576720000	619440000	718560000	504870016	575900032	745040000	805900032	517969984	557020032	545760000	762790016	11	11	11	70.2	70.2	70.2	10.08	0	103.89	8931400000	103
E5RJW4;Q9NW64;E5RHA8	Pre-mRNA-splicing factor RBM22	RBM22	0	0	0	0	0	0	0	0	0	0	0	18707000	0	2	2	2	16.8	16.8	16.8	20.769	0.0014465	3.0189	59854000	2
E5RK69	Annexin	ANXA6	0	0	0	0	0	0	0	101360000	170300000	0	0	0	0	32	2	2	62.8	4.3	4.3	51.776	0	26.649	1211300000	15
E7EM64;Q7L5N1	COP9 signalosome complex subunit 6	COPS6	950710016	975889984	995489984	1059600000	986430016	1163000064	963160000	827169984	932440000	748000000	1074499968	1031400000	1045299968	15	15	15	59.8	59.8	59.8	36.064	0	139.08	13382000000	164
E7EMG9;P33241;C9JU59;E9PBD8	Lymphocyte-specific protein 1	LSP1	0	0	0	78440000	0	0	0	0	0	82215000	0	0	0	3	3	3	22.5	22.5	22.5	30.613	0	49.541	150620000	7
E7EMN6;P41236;E7EUI7;Q6NXS1	Protein phosphatase inhibitor 2;Protein phosphatase inhibitor 2-like protein 3	PPP1R2;PPP1R2P3	0	0	0	0	0	0	0	135180000	0	0	0	0	0	6	6	6	39.4	39.4	39.4	19.245	0.00028571	6.1492	369280000	17
E7EMR3;E7ES20;E7ENK1;E7ESV6;E7EUP0;E7EX52;E7EN28;E9PBG4;E7EW95;E7EVD6;E7ETE3;E7EUW2;Q9HAR2	Latrophilin-3	ADGRL3;LPHN3	60124000	55815000	74192000	0	86849000	0	91209000	0	0	0	98985000	0	0	8	8	8	11	11	11	138.13	0	24.652	823560000	26
J3KMY5;G3V3E8;E7EMS2;G3V3D1;P61916;G3V2V8;H0YIZ1	Epididymal secretory protein E1	NPC2	0	0	161880000	0	0	0	0	0	0	0	0	61034000	67718000	5	5	5	43.9	43.9	43.9	16.23	0	9.4624	814260000	20
E7EMZ9;E9PBC6;O95359;Q4VXL4;D6RAA5;Q4VXL8	Transforming acidic coiled-coil-containing protein 2	TACC2	0	0	0	0	0	0	0	0	1663500032	0	0	0	0	4	3	3	1.8	1.5	1.5	296.74	0.0016702	2.8807	6409900000	10
E7ENQ6			0	0	0	0	0	0	0	0	0	75654000	0	0	0	8	2	0	26.4	8.1	0	30.095	0.00052715	4.4246	295690000	12
E7ENV7;Q86YQ8;Q8IYJ1	Copine-8;Copine-9	CPNE8;CPNE9	0	0	0	0	0	0	0	0	20271000	0	0	0	0	4	1	1	8.7	2.7	2.7	62.233	0.00052151	4.1977	22079000	4
E7EV99;E7ENY0;P35611;A0A0A0MSR2;H0Y9H2	Alpha-adducin	ADD1	16044000256	19111999488	16348999680	19805999104	19787999232	21350000640	18784000000	21412999168	22709000192	15274999808	19698999296	18992001024	23908999168	34	34	33	70.1	70.1	68.8	70.055	0	323.31	269480000000	683
E7EPC8;Q9UQB3;B4DRK2	Catenin delta-2	CTNND2	1745299968	1785200000	1450300032	2154700032	1795399936	1953699968	1683800064	1822499968	2158500096	1161299968	1421299968	1605400064	1748499968	42	42	16	56.1	56.1	22.6	123.08	0	323.31	23588000000	343
E7EPT4;P19404	NADH dehydrogenase [ubiquinone] flavoprotein 2, mitochondrial	NDUFV2	1986499968	1741799936	1597299968	1494300032	1241600000	1714800000	1585400064	1105400064	1450700032	1385400064	1344600064	1380000000	1207200000	13	13	13	52.4	52.4	52.4	27.907	0	172.64	19822000000	153
E7EQB2;E7ER44;P02788	Lactotransferrin;Lactoferricin-H;Kaliocin-1;Lactoferroxin-A;Lactoferroxin-B;Lactoferroxin-C	LTF	0	0	0	0	141610000	0	0	0	0	0	0	0	0	6	6	6	10.6	10.6	10.6	76.625	0	13.5	190690000	9
E7EQL5;E7EV09;E7EQU2;E7ETL8;E7ESD3;E7EMU4		DYNC1I2	0	0	0	0	0	0	0	0	0	0	0	53733000	0	10	1	1	45.6	8.9	8.9	34.913	0.00029146	6.8098	322570000	6
E7EQR4;P15311	Ezrin	EZR	16078999552	16677000192	13861000192	20056999936	16725999616	15498999808	16145999872	20415000576	24032000000	20416000000	17685000192	19324999680	19014000640	44	44	31	61.1	61.1	46.9	69.371	0	323.31	247710000000	736
E7EQY1;Q96C01;C9J2Y4	Protein FAM136A	FAM136A	133270000	138330000	131360000	102320000	0	0	138410000	0	0	0	114030000	0	0	4	4	4	18	18	18	26.776	0	10.263	957400000	27
E7ER68;Q658Y4	Protein FAM91A1	FAM91A1	0	0	0	0	32515000	0	0	0	0	0	0	0	0	3	3	3	3.5	3.5	3.5	88.986	0.0016843	2.9918	201630000	11
F5H6L3;E7ERK8;Q17R89	Rho GTPase-activating protein 44	ARHGAP44	137350000	104680000	0	101980000	95177000	0	106660000	86025000	68534000	0	0	84764000	0	8	8	7	21.7	21.7	20.1	66.186	0	39.06	999690000	31
E7ERS3;Q86VM9	Zinc finger CCCH domain-containing protein 18	ZC3H18	0	0	0	0	0	0	0	0	0	0	6101500	0	0	1	1	1	1.5	1.5	1.5	108.94	0.00027233	5.2043	71850000	9
E7ES52;P46527	Cyclin-dependent kinase inhibitor 1B	CDKN1B	0	0	0	0	19761000	0	0	0	0	0	0	0	0	2	2	2	16.6	16.6	16.6	23.183	0.0083553	2.0468	57390000	5
H0YBP1;E7ESA6;Q05397;E9PEI4;H0YB16;H0YBZ1	Focal adhesion kinase 1	PTK2	82529000	110320000	78743000	53124000	92695000	0	103190000	99033000	0	106090000	0	0	0	7	7	7	10.2	10.2	10.2	115.45	0	59.125	809410000	42
E7ESC9;Q8IZU2;H0YAG1	WD repeat-containing protein 17	WDR17	114720000	0	0	94119000	0	0	0	0	100570000	0	97867000	109410000	111620000	9	9	9	8.3	8.3	8.3	144.9	0	7.9104	812250000	32
E7ESK9;Q9Y2G0;H7BXG9	Protein EFR3 homolog B	EFR3B	0	0	65871000	0	0	0	0	0	0	0	0	0	0	4	4	4	7.2	7.2	7.2	88.573	0.00027203	5.1802	232540000	11
E7ESP4;E9PB77;E7EMF1		ITGA2	0	0	0	0	0	0	0	0	0	0	36940000	0	0	8	1	1	12.5	2.1	2.1	102.83	0.00029223	6.8442	405090000	8
E7ESP9;P07197;E7EMV2	Neurofilament medium polypeptide	NEFM	20139999232	19498999808	12284999680	13651000320	16602999808	12696000512	27690999808	12490000384	10551000064	15911000064	14931000320	11178999808	14753000448	47	46	41	54	53	50.7	98.38	0	323.31	209310000000	791
E7ESY4;Q13330;H0Y4T7	Metastasis-associated protein MTA1	MTA1	0	0	36190000	0	0	0	0	0	0	0	0	0	0	4	4	4	7.4	7.4	7.4	79.372	0	7.4832	156060000	12
E7ET15;O15042	U2 snRNP-associated SURP motif-containing protein	U2SURP	0	0	0	0	38421000	0	0	20561000	0	0	0	46677000	0	3	3	3	3.5	3.5	3.5	118.25	0	12.794	283890000	15
E7ETR1		CAMKV	0	0	0	0	0	59741000	0	0	0	0	0	0	0	19	2	2	57.6	6.6	6.6	46.669	0	23.452	53357000	2
E7ETZ4;Q9Y6E2;B5MCE7;B5MCH7;Q75MG1	Basic leucine zipper and W2 domain-containing protein 2	BZW2	64345000	0	55155000	81713000	0	69175000	0	0	0	0	0	0	0	5	5	5	11.3	11.3	11.3	46.913	0.00028281	5.9349	542400000	24
F5GXV3;F5H4Z6;F5GZ45;F5H3Z4;E7EU04;J3KR13;J3KQP4;P14207;F5H5L8;A0A087WYI3;A0A087WWY2;A0A087WXL1;P41439	Folate receptor beta;Folate receptor gamma	FOLR2;FOLR3	0	0	0	70000000	0	0	0	0	0	0	0	0	0	3	3	3	19.5	19.5	19.5	19.911	0.00098304	3.2872	68981000	3
E7EUK8;O94921	Cyclin-dependent kinase 14	CDK14	0	0	52976000	71918000	0	57867000	60147000	0	0	0	55155000	67998000	41517000	3	2	1	8.5	6.2	3.8	38.314	0.00075796	3.6699	589400000	21
E7EUN2;A0A087X1U1;F5GXM9		AGAP1	0	0	0	0	0	0	0	0	0	0	0	49118000	0	5	3	1	6.9	4.7	0.8	116.62	0	7.8786	219700000	11
E7EV01;O15484;A0A3B3IRX8	Calpain-5	CAPN5	464449984	366230016	529360000	550259968	475830016	474670016	476150016	398630016	645459968	534289984	438160000	377849984	436649984	14	14	14	26.9	26.9	26.9	77.469	0	30.52	6225300000	113
E7EV07		ARHGEF4	0	0	0	0	0	0	1094800000	0	0	0	0	0	0	4	4	2	2.2	2.2	1	198.25	0.00051962	4.1201	1756900000	15
E7EV41;P32418	Sodium/calcium exchanger 1	SLC8A1	0	0	0	0	0	0	0	0	0	0	0	0	86893000	1	1	1	3.5	3.5	3.5	74.427	0	11.392	433660000	7
E7EVA0;P27816	Microtubule-associated protein;Microtubule-associated protein 4	MAP4	1882800000	1454499968	865500032	2580699904	2252800000	1748700032	1103800064	3411699968	3804400128	1658400000	1880800000	1954599936	3248000000	39	39	27	24.8	24.8	18.5	245.44	0	323.31	28942000000	286
E7EVC7;Q676U5	Autophagy-related protein 16-1	ATG16L1	0	49066000	0	0	0	0	0	0	0	0	0	0	0	3	3	3	5	5	5	70.01	0.0095881	1.9579	64362000	4
E7EVJ5;Q96F07;H7C229;E7EW33	Cytoplasmic FMR1-interacting protein 2	CYFIP2	2336199936	2619099904	2357499904	2426500096	2580900096	1875900032	2637199872	2596300032	2503500032	2343899904	2261700096	2720199936	2463600128	50	50	30	45.9	45.9	26.7	142.58	0	257.25	34551000000	483
E7EVX8;Q8WWY3;E7EU94;E7ESX0;E7EN72	U4/U6 small nuclear ribonucleoprotein Prp31	PRPF31	0	49690000	150970000	104550000	0	0	0	87404000	120710000	0	0	0	0	5	5	5	14.2	14.2	14.2	54.766	0	10.932	960530000	22
H0YFS7;E7EW59;Q9Y467	Sal-like protein 2	SALL2	0	0	0	0	0	0	0	0	0	0	427769984	0	0	4	4	4	7.6	7.6	7.6	94.902	0.00026976	4.9585	1340400000	8
E7EWD3;O75077	Disintegrin and metalloproteinase domain-containing protein 23	ADAM23	0	0	0	0	0	0	83778000	0	0	0	0	0	0	2	2	2	3.5	3.5	3.5	92.045	0.0043379	2.3872	185270000	7
E7EWP0;H0Y886;O43674	NADH dehydrogenase [ubiquinone] 1 beta subcomplex subunit 5, mitochondrial	NDUFB5	0	0	0	0	0	0	0	0	151980000	0	187930000	114130000	109720000	7	7	7	29.9	29.9	29.9	20.038	0	12.784	1407400000	23
E9PID8;E7EWR4;P33240	Cleavage stimulation factor subunit 2	CSTF2	0	0	0	0	0	0	0	0	0	0	40363000	0	0	4	4	2	12.6	12.6	9.4	46.665	0	40.898	244770000	7
E7EX17;P23588;F8VP89;F8VSC7;F8VX11	Eukaryotic translation initiation factor 4B	EIF4B	260170000	280840000	215320000	265280000	248770000	286060000	208400000	170010000	232420000	316440000	228240000	429060000	0	10	10	10	21.8	21.8	21.8	69.697	0	99.939	3252000000	34
E7EX44;Q05682	Caldesmon	CALD1	470760000	581729984	415220000	653619968	829720000	596979968	432980000	479840000	672729984	817340032	393689984	674320000	687270016	21	21	2	35.4	35.4	2.3	64.168	0	155.58	7725800000	108
E7EX90;Q6AWB1		DCTN1;DKFZp686E0752	0	0	0	0	0	0	0	0	0	0	0	0	94733000	63	1	1	61.5	2.7	2.7	139.09	0	49.489	667010000	11
E9PAM4;Q9BTU6	Phosphatidylinositol 4-kinase type 2-alpha	PI4K2A	0	29176000	0	0	0	0	0	0	0	0	27858000	0	0	3	3	2	6.5	6.5	3.8	51.218	0.001444	2.9958	148540000	13
F8VZJ2;H0YHX9;Q13765;E9PAV3;F8W0W4;F8W1N5;F8VNW4	Nascent polypeptide-associated complex subunit alpha;Nascent polypeptide-associated complex subunit alpha, muscle-specific form	NACA	399480000	399310016	312489984	450990016	431529984	389470016	356400000	641880000	460329984	558520000	378180000	421220000	472400000	5	5	5	51.5	51.5	51.5	15.016	0	64.652	5849400000	64
E9PB61;Q86V81	THO complex subunit 4	ALYREF	91995000	0	0	104270000	0	0	0	0	0	0	0	0	0	6	6	6	30.3	30.3	30.3	27.557	0	80.395	840270000	23
F8WBR7;E9PBE3;Q8N3I7	Bardet-Biedl syndrome 5 protein	BBS5	0	0	0	0	0	0	0	0	0	9192400	0	0	0	1	1	1	18.9	18.9	18.9	6.0647	0.001889	2.7897	67277000	8
E9PBG3;Q9NQ86	E3 ubiquitin-protein ligase TRIM36	TRIM36	0	0	0	0	0	0	33372000	0	0	0	0	0	0	3	3	3	6.8	6.8	6.8	65.568	0.0007515	3.5309	104210000	6
E9PBG7;E9PF82		CAMK2D	3605299968	3381900032	3039300096	3054700032	2918500096	2907399936	3623000064	2344800000	2534899968	2830500096	2596900096	3036199936	2980100096	23	13	1	61.3	36.1	4.3	57.762	0	323.31	41081000000	184
E9PBM2;Q8WUF8;B4DMI0	Protein FAM172A	FAM172A	0	0	19915000	0	0	0	0	0	0	0	0	0	0	4	4	4	17	17	17	35.135	0.00053376	4.7136	106930000	7
E9PC47;P53667	LIM domain kinase 1	LIMK1	0	11875000	0	0	0	0	0	0	0	0	0	0	0	1	1	1	2.1	2.1	2.1	75.526	0.006225	2.1479	12983000	3
E9PC69;Q7KZI7;E7ETY4	Serine/threonine-protein kinase MARK2	MARK2	0	88941000	106580000	103850000	0	0	0	0	0	0	0	128360000	0	6	6	4	9.5	9.5	6.2	86.69	0	7.3309	626330000	15
H0YA68;E9PCD7;Q9Y2E5	Alpha-mannosidase;Epididymis-specific alpha-mannosidase	MAN2B2	0	0	0	0	0	0	0	0	0	0	0	0	0	1	1	1	1.7	1.7	1.7	107.51	0.00075892	3.6847	0	1
E9PCH6		ANK2	0	178730000	0	0	0	0	0	0	367560000	0	0	0	0	44	1	0	54	1.1	0	117.84	0.0023234	2.5963	2024700000	7
E9PCR7;E9PDF2;E9PFG7		OGDH	0	0	0	0	0	0	0	0	0	0	0	95994000	0	46	1	1	56.8	3.6	3.6	117.66	0	53.328	397350000	3
E9PCT3;P51636	Caveolin;Caveolin-2	CAV2	0	0	0	76054000	35828000	0	0	0	0	0	0	23334000	0	1	1	1	10.6	10.6	10.6	12.953	0.0083535	2.046	175060000	10
E9PCY7;G8JLB6;P31943;D6RIT2;D6RIU0;D6RBM0;E7EQJ0;D6RAM1;D6R9T0;D6RFM3;D6RDU3;D6RJ04;D6RIH9;E5RGV0;E7EN40	Heterogeneous nuclear ribonucleoprotein H;Heterogeneous nuclear ribonucleoprotein H, N-terminally processed	HNRNPH1	2447699968	2329700096	2407699968	2482200064	2169999872	2464999936	2105799936	2048800000	1852800000	1734700032	1892800000	2133400064	1989900032	12	10	7	36.8	30.5	19.8	47.087	0	90.242	29247000000	144
E9PD09;Q96HH9;D6REP5;B7Z4W8	GRAM domain-containing protein 3	GRAMD3	0	0	0	91543000	0	0	0	0	0	0	0	0	0	3	3	3	12.7	12.7	12.7	45.504	0.00026817	4.834	447210000	7
E9PDG8;O60641;E5RGY9	Clathrin coat assembly protein AP180	SNAP91	7734099968	8338800128	5554999808	6465500160	5694300160	5211200000	5942400000	7053599744	4943000064	4873500160	5790600192	5553800192	5037300224	22	22	20	30.4	30.4	28.2	91.969	0	323.31	86884000000	368
E9PDU6	Calponin	CNN3	0	0	0	0	0	0	0	0	0	37213000	0	0	0	10	1	1	81.6	5.9	5.9	20.208	0.0093989	1.992	178270000	8
E9PEB5;Q96AE4	Far upstream element-binding protein 1	FUBP1	887520000	834979968	712489984	745350016	787609984	873209984	667260032	586449984	581059968	668899968	710470016	603859968	595129984	19	17	16	34.5	33.3	31.9	68.903	0	156.34	9591100000	154
E9PEM5;P50851;H0YAC6	Lipopolysaccharide-responsive and beige-like anchor protein	LRBA	0	90220000	98450000	0	0	0	92633000	0	0	0	99942000	102070000	0	12	8	8	5.5	4	4	286.97	0	11.836	749420000	29
E9PER6;O15530;Q6A1A2	3-phosphoinositide-dependent protein kinase 1;Putative 3-phosphoinositide-dependent protein kinase 2	PDPK1;PDPK2P	204190000	180180000	200830000	144060000	192380000	202940000	158100000	189100000	175760000	0	0	193700000	168950000	9	9	9	23.1	23.1	23.1	60.328	0	13.458	2161000000	48
E9PF17;P13611	Versican core protein	VCAN	18542000128	20096000000	28352999424	16240000000	20647000064	20242999296	34649001984	28821000192	32935000064	25226000384	23793999872	33589000192	22254999552	26	26	14	19.5	19.5	9.9	176.83	0	323.31	333760000000	579
E9PF18;Q16836;A0A0A0MSE2;A0A0D9SFP2;A0A1W2PNM1;A0A1W2PQV5;A0A1W2PQ78	Hydroxyacyl-coenzyme A dehydrogenase, mitochondrial	HADH	4000000000	3298400000	4518799872	3565400064	3988199936	4228400128	4314500096	3020499968	4741300224	2898899968	5395999744	4373499904	4201600000	13	13	13	54.4	54.4	54.4	42.123	0	323.31	62526000000	223
E9PF59;P42658	Dipeptidyl aminopeptidase-like protein 6	DPP6	1749100032	1965799936	1969200000	1935000064	1743699968	1721500032	2360499968	1125799936	1299500032	1432000000	1340499968	1246099968	1355500032	29	29	4	45.6	45.6	7.4	91.245	0	198.95	22107000000	255
E9PFK9;Q9UJ41;Q3HKR1;A0A0A0MSJ3	Rab5 GDP/GTP exchange factor	RABGEF1	0	0	66496000	67254000	85429000	0	84672000	95335000	82154000	174430000	80589000	98141000	78480000	6	6	6	13.7	13.7	13.7	58.394	0	9.005	964410000	38
E9PFP8;P57721;J3QT27	Poly(rC)-binding protein 3	PCBP3	786720000	778220032	680969984	773489984	632000000	753529984	514380000	830689984	688110016	457910016	670400000	628209984	622280000	12	8	7	60.9	46.3	42.9	38.187	0	151.93	9503500000	124
E9PFR3;Q14738;H0Y8C4	Serine/threonine-protein phosphatase 2A 56 kDa regulatory subunit delta isoform	PPP2R5D	359310016	360140000	324400000	321480000	267220000	220380000	393940000	240550000	314460000	266910000	444030016	458340000	322360000	18	18	12	39.9	39.9	26.4	69.116	0	77.994	4662500000	107
E9PFU5;P41586	Pituitary adenylate cyclase-activating polypeptide type I receptor	ADCYAP1R1	0	0	0	0	0	0	81533000	0	0	0	0	0	0	2	2	2	4.6	4.6	4.6	59.618	0.00074794	3.473	295890000	10
H7C4Y5;E9PG22;Q8IW35	Centrosomal protein of 97 kDa	CEP97	0	0	0	0	0	0	0	0	0	0	0	0	0	1	1	1	7.4	7.4	7.4	19.511	0.0043409	2.3944	0	3
E9PGC0;P20936	Ras GTPase-activating protein 1	RASA1	0	0	0	0	0	0	0	0	0	0	0	11858000	0	2	2	2	2.6	2.6	2.6	101.79	0.00098425	3.3091	64132000	9
E9PGC8;P78559	Microtubule-associated protein 1A;MAP1A heavy chain;MAP1 light chain LC2	MAP1A	6891899904	7106599936	6837000192	7235599872	7079399936	8522599936	7454799872	8171800064	5607000064	5875999744	7262600192	5922800128	6287099904	102	99	99	46.7	45.9	45.9	331.25	0	323.31	93528000000	962
E9PGM1;E7EX73;E7EUU4;Q04637	Eukaryotic translation initiation factor 4 gamma 1	EIF4G1	567849984	576000000	506780000	716449984	673270016	530969984	518870016	563489984	622720000	522630016	646120000	608830016	669529984	29	29	26	26.2	26.2	24.5	166.75	0	146.85	8050200000	177
E9PGP6;Q9UGJ0	5-AMP-activated protein kinase subunit gamma-2	PRKAG2	0	0	0	0	0	0	0	0	109070000	0	0	0	0	4	4	4	15.1	15.1	15.1	50.25	0.00028082	5.7934	841460000	17
E9PGT1;Q15631;H7C1D4	Translin	TSN	1880800000	1438499968	1559299968	1486800000	1410800000	1219000064	1297600000	1391399936	1800499968	1327399936	1497200000	1633500032	1260300032	10	10	10	42.6	42.6	42.6	25.572	0	188.3	19846000000	157
E9PGT6;Q99627;H7C3S9	COP9 signalosome complex subunit 8	COPS8	831910016	750670016	726720000	804190016	893950016	876780032	811249984	891980032	827480000	745379968	749190016	766529984	970099968	6	6	6	72.3	72.3	72.3	19.344	0	74.953	11158000000	65
E9PH82;Q8NCA5	Protein FAM98A	FAM98A	0	0	138750000	103830000	0	0	216320000	349740000	0	0	167570000	203270000	0	7	5	5	26.3	21.8	21.8	34.431	0	13.599	1357700000	30
E9PHB5		CTNND2	0	0	0	0	0	0	0	0	0	0	0	0	35618000	28	2	2	45.1	3.4	3.4	99.403	0.0020979	2.6358	170730000	13
E9PHK0;P05452	Tetranectin	CLEC3B	0	0	0	0	0	0	0	0	0	0	18518000	0	0	1	1	1	7.5	7.5	7.5	17.794	0.0077382	2.096	64039000	4
E9PHK5;P01189	Pro-opiomelanocortin;NPP;Melanotropin gamma;Potential peptide;Corticotropin;Melanotropin alpha;Corticotropin-like intermediary peptide;Lipotropin beta;Lipotropin gamma;Melanotropin beta;Beta-endorphin;Met-enkephalin	POMC	24212000	0	0	0	0	0	0	0	0	0	0	0	0	1	1	1	8.5	8.5	8.5	27.065	0.0018948	2.8161	24212000	1
E9PHR9;Q9NRQ2;C9J6E1	Phospholipid scramblase 4	PLSCR4	0	0	293289984	0	0	0	223330000	185930000	0	0	338340000	0	260910000	4	4	4	16.7	16.7	16.7	26.249	0	8.218	2400200000	24
E9PHY0;P11117;B7Z7D2;E9PQY3;E9PP23	Lysosomal acid phosphatase	ACP2	85187000	78355000	62200000	0	0	69638000	0	0	64851000	55420000	61205000	0	52176000	5	5	5	12.5	12.5	12.5	40.99	0.00028337	5.9847	722650000	34
E9PHY5;E9PK52;E9PII3;A0A2R8Y5B3		EPB41L2	4446900224	5080600064	6237899776	8834599936	5529999872	8159000064	5076199936	7182499840	7138299904	6684899840	4956100096	5756800000	6846199808	48	43	0	54.5	51	0	104.36	0	323.31	83970000000	518
E9PHY8;Q8NDA8	Maestro heat-like repeat-containing protein family member 1	MROH1	0	119640000	86462000	78815000	99863000	0	80319000	87356000	90809000	0	0	70270000	121830000	17	17	17	13.7	13.7	13.7	180.28	0	17.505	1111400000	44
E9PPQ8;E9PI86;P49321;E9PPR5	Nuclear autoantigenic sperm protein	NASP	0	0	0	0	0	0	0	0	0	17824000	0	0	0	2	2	2	19.5	19.5	19.5	16.674	0	10.734	164560000	7
E9PI87;Q9BUP3	Oxidoreductase HTATIP2	HTATIP2	0	0	0	0	0	0	0	0	0	0	0	0	114470000	4	4	4	27.6	27.6	27.6	21.976	0.00027405	5.3109	223630000	3
E9PIE3;Q969G5	Protein kinase C delta-binding protein	PRKCDBP	122470000	0	0	106680000	137690000	0	0	0	0	86948000	0	0	0	5	5	5	17.7	17.7	17.7	31.088	0	7.5046	558450000	12
E9PIM6;E9PNQ8;P04216;J3QRJ3	Thy-1 membrane glycoprotein	THY1	5342000128	4703900160	5808300032	5591699968	5569200128	3965100032	6614600192	2297100032	2284400128	5428800000	3632199936	2760800000	3183099904	4	4	4	26.3	26.3	26.3	16.927	0	74.065	61076000000	149
E9PIN3;Q9UBU9	Nuclear RNA export factor 1	NXF1	0	0	0	0	0	0	0	365470016	0	0	361720000	0	0	3	3	1	6.3	6.3	2	68.106	0.00026947	4.9304	921430000	11
E9PIQ8;G0XQ39;Q13586;E9PRE4;E9PR07;E9PJ19;E9PMB4;E9PRZ7;E9PR09;E9PN27;E9PNJ4	Stromal interaction molecule 1	STIM1	0	34512000	0	54253000	41983000	49282000	32009000	0	0	0	35235000	0	0	2	2	2	16.5	16.5	16.5	16.212	0.00051073	3.8047	342340000	16
E9PJ55;Q9NUJ3	T-complex protein 11-like protein 1	TCP11L1	79890000	70235000	0	0	77358000	0	77680000	0	0	62503000	64334000	0	75315000	6	6	6	13.3	13.3	13.3	67.238	0.00029163	6.8161	737200000	35
E9PJ81;E9PRQ7;Q04323;A0A087WTZ5	UBX domain-containing protein 1	UBXN1	46294000	87576000	0	0	78038000	0	0	69963000	120250000	0	101490000	63437000	0	5	5	5	27.2	27.2	27.2	32.611	0	104.35	1120700000	33
E9PJD9;E9PLL6;P46776;E9PLX7	60S ribosomal protein L27a	RPL27A	0	0	0	0	0	0	31497000	0	0	0	0	0	0	2	2	2	23.1	23.1	23.1	10.127	0.007728	2.0765	126790000	6
E9PJE4;Q9GZQ3;H0YEQ6	COMM domain-containing protein 5	COMMD5	0	0	0	0	0	0	0	0	0	0	57337000	0	0	3	3	3	35.7	35.7	35.7	18.487	0	18.236	297690000	6
E9PMI6;E9PJF4;J3KN38;P54105	Methylosome subunit pICln	CLNS1A	0	0	0	0	0	0	0	0	0	0	0	0	78928000	1	1	1	7.8	7.8	7.8	18.259	0.00075377	3.5945	1014100000	15
E9PJM3;Q9UK99;G3V1E0	F-box only protein 3	FBXO3	0	0	0	67563000	0	0	0	0	0	0	0	0	0	5	5	5	14.7	14.7	14.7	49.153	0	13.392	238380000	16
E9PJP2;Q5TF21;H3BRB8	Protein SOGA3	SOGA3	204280000	179960000	174640000	176800000	172400000	159020000	195030000	148830000	116010000	165130000	172980000	141120000	0	14	14	13	16	16	14.8	102.88	0	37.249	2066100000	57
E9PK47;P06737	Alpha-1,4 glucan phosphorylase;Glycogen phosphorylase, liver form	PYGL	115320000	136930000	156690000	214750000	173070000	102300000	103770000	225390000	172070000	202640000	243330000	119180000	167630000	30	21	21	42	30.6	30.6	94.069	0	116.61	2145400000	82
E9PS17;E9PK59;Q96KG9;E9PPN3	N-terminal kinase-like protein	SCYL1	0	0	0	0	0	0	0	89256000	0	0	0	0	0	11	11	11	22.2	22.2	22.2	85.718	0	34.463	392050000	25
E9PK67;E9PNI7;Q53GL7;E9PJI2;E9PPV8;E9PPE7	Poly [ADP-ribose] polymerase 10	PARP10	0	0	0	0	0	0	0	0	0	0	35044000	0	0	3	3	3	4.2	4.2	4.2	109.1	0	9.4617	112830000	7
E9PKC0;Q6IQ23;E9PL74;A0A1B0GUN0;H0YDE2;A0A1B0GTN9	Pleckstrin homology domain-containing family A member 7	PLEKHA7	0	39769000	0	0	0	0	0	0	0	0	0	0	39280000	4	4	4	3.2	3.2	3.2	144.42	0.00028361	6.0009	313860000	22
H7BXH2;E9PKF6;Q5H9R7;E9PQP7	Serine/threonine-protein phosphatase 6 regulatory subunit 3	PPP6R3	96147000	105970000	0	0	120820000	0	113490000	94026000	104240000	0	123010000	79828000	0	11	11	11	17.5	17.5	17.5	92.407	0	84.551	1103600000	41
E9PKG1;Q99873;E9PQ98;E9PIX6;H0YDE4	Protein arginine N-methyltransferase 1	PRMT1	425969984	357280000	348569984	408820000	353780000	282849984	368680000	375500000	342400000	350340000	330000000	321560000	334089984	15	15	15	48.6	48.6	48.6	37.709	0	49.665	4657700000	113
E9PKP7;P17480;E9PLT2	Nucleolar transcription factor 1	UBTF	0	0	0	0	0	0	0	0	98662000	0	128060000	0	0	4	4	4	9.3	9.3	9.3	87.435	0.00028736	6.401	578860000	12
E9PKT1;Q8IVF5;E9PMZ8	T-lymphoma invasion and metastasis-inducing protein 2	TIAM2	0	115970000	0	106850000	0	0	0	0	136630000	0	0	0	0	8	8	8	12.7	12.7	12.7	117.39	0	21.727	801570000	23
E9PKU7		GANAB	0	0	0	0	0	0	0	0	0	0	0	0	22738000	34	1	1	52.7	2.2	2.2	96.543	0	14.729	387630000	10
E9PL57;Q86V88	Magnesium-dependent phosphatase 1	NEDD8-MDP1;MDP1	0	0	148180000	0	79768000	0	61424000	49634000	179610000	0	162900000	0	0	4	4	3	32.9	32.9	24.7	19.536	0	232.03	908900000	24
E9PL71;E9PN91		EEF1D	0	0	0	0	0	0	52115000	0	0	0	0	0	0	6	1	1	43.3	11.2	11.2	20.819	0.0018855	2.7746	57002000	1
E9PLK3;P55786	Puromycin-sensitive aminopeptidase	NPEPPS	14871000064	15137999872	13987999744	15480000512	15073000448	15285999616	13706000384	16561000448	13447999488	16266000384	14755000320	13203000320	14520000512	51	51	51	62	62	62	102.99	0	323.31	199200000000	908
E9PLP8;Q12996	Cleavage stimulation factor subunit 3	CSTF3	0	0	0	0	0	0	0	0	0	0	0	14916000	0	2	2	2	3.5	3.5	3.5	86.272	0.00051975	4.1239	122660000	8
E9PLX2;E9PQV2;Q8WVD5	RING finger protein 141	RNF141	0	0	0	0	0	0	0	16157000	0	0	0	0	0	2	2	2	16.1	16.1	16.1	19.852	0.00027632	5.4646	15304000	4
E9PMJ2;J3KP39;Q9BPY3;G3V179;E9PMW3;E9PIM5	Protein FAM118B	FAM118B	32737000	51211000	0	0	0	0	0	0	0	0	0	0	0	5	5	5	22	22	22	39.079	0	21.132	275610000	17
E9PMV2		HLA-DQA1	0	0	0	0	0	0	0	0	0	0	38394000	0	0	2	1	1	10.7	5.1	5.1	23.673	0.0038919	2.4144	99400000	3
E9PN76;Q8ND24	RING finger protein 214	RNF214	0	0	0	0	0	0	37341000	0	36719000	0	0	0	0	4	4	4	9.9	9.9	9.9	57.571	0	24.803	283440000	10
E9PNL8;Q13574;H0YDN6;E9PFX6;A0A087WV00;E7EM72;E7EWQ4;O75912	Diacylglycerol kinase;Diacylglycerol kinase zeta;Diacylglycerol kinase iota	DGKZ;DGKI	0	0	0	54375000	0	0	0	0	0	0	0	0	0	2	2	2	4.4	4.4	4.4	78.927	0.0019029	2.8435	53583000	2
E9PNP3;Q9H7C9;E9PIQ4;E9PR47	Mth938 domain-containing protein	AAMDC	157620000	0	93433000	0	112640000	0	0	0	0	0	0	0	0	3	3	3	25.5	25.5	25.5	15.588	0	38.306	664530000	17
E9PNR2;Q13671	Ras and Rab interactor 1	RIN1	0	0	0	0	0	0	0	0	0	0	0	0	19796000	1	1	1	1.8	1.8	1.8	66.545	0.0091964	2.0017	234530000	13
E9PNR8;Q9NWT6	Hypoxia-inducible factor 1-alpha inhibitor	HIF1AN	0	0	0	0	0	0	0	0	0	0	0	0	48429000	1	1	1	45.7	45.7	45.7	3.5067	0.002095	2.6266	152870000	5
G3V158;E9PPM8;Q9Y315	Deoxyribose-phosphate aldolase	DERA	0	0	66716000	76762000	77589000	71625000	69676000	75485000	83305000	0	78500000	0	59670000	5	5	5	27.8	27.8	27.8	25.113	0	11.086	756710000	41
E9PPQ1;J3KNE7;Q16890;E9PNK6;E9PNQ9	Tumor protein D53	TPD52L1	285560000	218110000	0	246090000	255610000	306720000	175540000	185040000	167620000	0	0	0	222980000	6	6	6	47.1	47.1	47.1	20.987	0	16.613	2559800000	42
E9PQ73;Q8TDW7	Protocadherin Fat 3	FAT3	10229999616	0	18189000704	19345000448	0	0	0	14145999872	20017000448	19805999104	12216000512	13688999936	0	3	3	3	0.9	0.9	0.9	488.84	0.0057894	2.1636	164220000000	27
E9PQD7;P15880;H0YEN5	40S ribosomal protein S2	RPS2	0	0	0	0	0	0	0	0	0	160120000	0	0	0	5	5	5	29.4	29.4	29.4	25.211	0	13.242	1513600000	22
E9PQM0;Q8WUK0	Phosphatidylglycerophosphatase and protein-tyrosine phosphatase 1	PTPMT1	0	0	0	0	0	0	0	0	0	0	0	6981000	0	2	2	2	14.9	14.9	14.9	18.215	0.0005144	3.952	30206000	9
H7BYV1;E9PS44;E9PQN9;P13164;Q01629;Q01628	Interferon-induced transmembrane protein 1;Interferon-induced transmembrane protein 2;Interferon-induced transmembrane protein 3	IFITM2;IFITM3;IFITM1	0	0	0	0	0	0	0	0	0	0	0	0	23137000	1	1	1	21.6	21.6	21.6	8.0866	0	11.391	226500000	7
E9PQY2;Q9NQP4	Prefoldin subunit 4	PFDN4	0	0	0	0	0	0	0	0	0	0	0	63857000	0	2	2	2	19.9	19.9	19.9	15.598	0	20.046	490520000	9
E9PR38;H0YEH2;Q5T1Z4;Q5T1Z8;Q14671;H0YDK8	Pumilio homolog 1	PUM1	47165000	0	52673000	0	47315000	0	0	74456000	0	0	0	0	0	5	5	5	6.4	6.4	6.4	100.5	0	102.99	441930000	19
E9PR44;P02511;E9PJL7;E9PRA8;A0A024R3B9;E9PNH7	Alpha-crystallin B chain	CRYAB	10556999680	16049000448	12869000192	17696999424	15820000256	16711000064	22386999296	12995000320	10348000256	18592999424	11792000000	11422000128	18055000064	19	19	19	89.1	89.1	89.1	20.03	0	323.31	218070000000	566
E9PRA3;Q9BZ67	FERM domain-containing protein 8	FRMD8	0	0	0	0	0	0	0	0	0	0	30577000	0	0	1	1	1	34.4	34.4	34.4	9.5497	0.00053149	4.5876	133220000	4
E9PRY8;A0A087X1X7		EEF1D	1102400000	982230016	849139968	1076499968	1054499968	1167100032	799660032	1194700032	1028400000	804390016	913550016	921080000	1087000064	18	18	5	29.4	29.4	9.6	76.569	0	323.31	14005000000	162
E9PSI1;E9PQI5;E9PQ80;Q9BY43	Charged multivesicular body protein 4a	CHMP4A	0	0	0	0	0	0	0	0	0	0	38171000	0	0	3	3	3	3.9	3.9	3.9	92.386	0.0025522	2.5804	119240000	6
F1T0E5		CADPS	0	0	0	0	0	0	0	0	0	0	0	36501000	0	44	1	1	42.3	1.4	1.4	152	0.00051613	4.017	101290000	3
F2Z2J1;Q15349;B7Z3B5	Ribosomal protein S6 kinase;Ribosomal protein S6 kinase alpha-2	RPS6KA2	503180000	499609984	412790016	517249984	536230016	498560000	524689984	457529984	455880000	544520000	419969984	479540000	405409984	22	22	14	35.8	35.8	24.4	85.633	0	41.833	6456300000	149
F2Z2X4;Q9C0E2	Exportin-4	XPO4	0	0	0	0	0	0	0	0	0	0	6283900	0	0	2	2	2	2.4	2.4	2.4	130.15	0.0012154	3.1395	20731000	4
F2Z2Y6;O95777;C9JNV3;C9JIZ0	U6 snRNA-associated Sm-like protein LSm8	LSM8	0	150530000	0	0	0	0	0	136880000	0	0	0	109940000	123520000	4	4	4	64.2	64.2	64.2	7.3713	0.00029019	6.7554	1008200000	24
F2Z357;J3KPC5;P47736;A0A0A0MQY8;X6R8W7	Rap1 GTPase-activating protein 1	RAP1GAP	460769984	449340000	380769984	470150016	501489984	431760000	444169984	369380000	345009984	248370000	282329984	435729984	413360000	18	18	17	46.2	46.2	45	66.98	0	63.807	5404900000	107
F5GWI4;P00813;F5GYD4;F5GXW0	Adenosine deaminase	ADA	0	0	0	0	0	0	0	0	0	0	0	72278000	0	2	2	2	11.2	11.2	11.2	38.292	0	23.275	87141000	2
Q3KPI9;F5GWR7;P23468	Protein-tyrosine-phosphatase;Receptor-type tyrosine-protein phosphatase delta	PTPRD	534129984	621510016	522540000	532409984	502150016	544060032	550739968	527720000	571670016	580540032	549190016	469420000	481640000	27	27	15	23.9	23.9	13.8	168.66	0	226.36	7138600000	159
F5GWT4;Q9H4A3	Serine/threonine-protein kinase WNK1	WNK1	108730000	118550000	124080000	119940000	133280000	141600000	122730000	0	128790000	139720000	128320000	119350000	109270000	10	9	8	7	6.5	6.1	225.5	0	44.711	1567700000	49
F5GX39;Q15363;E7EQ72	Transmembrane emp24 domain-containing protein 2	TMED2	0	0	0	0	0	0	0	0	0	0	0	111740000	0	4	4	4	43.1	43.1	43.1	13.631	0.00027609	5.438	1090800000	10
F5GX77;Q9UI30;F5GYQ2	Multifunctional methyltransferase subunit TRM112-like protein	TRMT112	0	86634000	81992000	73406000	95717000	78540000	58367000	0	0	0	0	0	0	2	2	2	24.5	24.5	24.5	11.972	0.00029481	7.0653	834980000	22
F5GXC5;Q8TB96;H3BUJ1	T-cell immunomodulatory protein	ITFG1	0	81855000	93109000	0	0	0	0	0	0	0	0	0	0	3	3	3	8.6	8.6	8.6	52.106	0.00027556	5.395	463030000	11
F5GXW5;U3KQ07;Q99622	Protein C10	C12orf57	0	0	0	0	0	0	0	0	0	0	0	12974000	0	2	2	2	35.1	35.1	35.1	9.9953	0.0089794	2.0045	47820000	2
F5GYK2;Q9NRL3;M0R317	Striatin-4	STRN4	0	0	0	0	71240000	0	70110000	0	0	0	55538000	0	0	6	5	5	13.7	12.1	12.1	68.584	0	13.405	665100000	16
F5GYQ1;P61421;R4GN72;J3QL14	V-type proton ATPase subunit d 1	ATP6V0D1	5096399872	4589199872	3910899968	4236400128	3740499968	4315200000	4148400128	2986099968	2673400064	3879300096	3713299968	4022099968	3486099968	13	13	13	39.5	39.5	39.5	44.659	0	323.31	52078000000	216
F5GZH3;F5H866;F5GZ38;F5H1B8;Q9UF11;F5H3M1;F5GYU9;F5H114;F5H0R6;F5GY87;F5H190	Pleckstrin homology domain-containing family B member 1	PLEKHB1	0	0	0	0	179650000	0	0	0	189600000	0	158230000	248210000	229040000	8	8	8	60.4	60.4	60.4	17.767	0	15.963	2093700000	44
F5GZ97;Q9Y3C0;F5GWI9;F5GXZ7;H0YGN0	WASH complex subunit CCDC53	CCDC53	0	0	0	0	0	0	0	46117000	0	0	0	0	0	4	4	4	30.1	30.1	30.1	21.044	0.0002896	6.7008	231550000	10
F5GZS6;J3KPF3;P08195	4F2 cell-surface antigen heavy chain	SLC3A2	4951000064	5363999744	3933499904	5861199872	4945299968	4441600000	5500299776	5851599872	7935300096	6336200192	7496300032	5643800064	6980100096	28	28	28	46.7	46.7	46.7	64.872	0	323.31	77660000000	397
F5H039;Q9NQX3;G3V582	Gephyrin;Molybdopterin adenylyltransferase;Molybdopterin molybdenumtransferase	GPHN	1250300032	1352800000	1184099968	1156099968	1282099968	1435200000	1123299968	1423200000	1136400000	840169984	1372800000	1174800000	954750016	28	28	28	50.1	50.1	50.1	84.733	0	323.31	16302000000	193
F5H7C4;F5H199		MSRB3	0	0	0	0	0	0	0	0	0	0	0	0	16972000	1	1	1	9.4	9.4	9.4	13.101	0.0023223	2.5925	71136000	5
F5H1S9;G8JLB3;Q9Y606;F5H168;F5GY32;F8W9U5;F5H1B2;F5GXL3	tRNA pseudouridine synthase;tRNA pseudouridine synthase A, mitochondrial	PUS1	22516000	0	0	0	0	0	0	0	0	0	0	0	0	2	2	2	6.1	6.1	6.1	41.729	0.009401	1.9933	22516000	7
H0YGQ3;F5H1U9;O75970;A0A075B6R8;B7ZB24	Multiple PDZ domain protein	MPDZ	54510000	53690000	0	53286000	0	62540000	0	0	0	0	0	0	0	2	2	2	2.6	2.6	2.6	106.76	0.00052757	4.4325	337240000	13
F5H8G1;F5H1Z6;F5H8H3;Q9Y365;F5GWK5;F5H0V7;F5GY11;H0YGA9;H0YFF3	PCTP-like protein	STARD10	83717000	88781000	0	0	0	0	0	74420000	0	0	0	0	0	5	5	5	38.2	38.2	38.2	21.934	0	8.3785	552070000	17
F5H269;Q9Y485	DmX-like protein 1	DMXL1	0	0	0	0	0	0	0	0	0	0	0	13745000	0	3	2	2	1.1	0.9	0.9	340.24	0.0053775	2.2213	27532000	2
F5H283;Q92563	Testican-2	SPOCK2	0	27520000	0	0	0	0	0	0	0	0	0	0	0	4	4	4	9.2	9.2	9.2	46.649	0.00051813	4.0713	154220000	8
F5H2Z7		CCDC92	22186000	0	0	0	0	0	0	0	0	0	0	0	0	2	1	1	21.9	14.6	14.6	10.992	0.0018989	2.8275	22186000	1
F5H365;Q15436	Protein transport protein Sec23A	SEC23A	1118899968	1071600000	1082200064	1307500032	1199299968	1101200000	1038899968	909009984	983929984	914169984	1021500032	1026499968	1291800064	23	23	20	41.4	41.4	36.5	82.968	0	254.67	14669000000	166
F5H442;Q99816	Tumor susceptibility gene 101 protein	TSG101	229510000	269520000	229800000	262910000	301089984	259620000	247010000	280600000	251560000	0	225070000	229510000	294620000	8	8	8	23.6	23.6	23.6	40.917	0	16.165	3392600000	76
F8VY35;F5H4R6;H0YIV4;P55209;F8W020;F8W0J6;H0YH88;H0YHC3;F8VXI6;F8VUX1;F8VVB5	Nucleosome assembly protein 1-like 1	NAP1L1	1617699968	1500899968	1189200000	1578200064	1454899968	1742499968	1648199936	1562899968	1860099968	1668899968	1842599936	1734499968	1955399936	13	11	2	54.9	51.1	16.7	31.02	0	323.31	22065000000	141
H0Y8R1;F5H5I6;H0YAK1;Q12849	G-rich sequence factor 1	GRSF1	195730000	183530000	235320000	153690000	0	208490000	206880000	183600000	191350000	0	164740000	345950016	186840000	6	6	6	21.8	21.8	21.8	47.27	0	32.284	2607800000	36
F5H5P2;P12694;F5GXU9	2-oxoisovalerate dehydrogenase subunit alpha, mitochondrial	BCKDHA	491710016	493590016	620329984	491670016	469649984	580080000	541630016	594129984	539400000	438910016	570220032	553059968	547689984	13	13	13	40.7	40.7	40.7	54.202	0	215.75	7365900000	125
H0YIW3;H7C5W6;F5H619;Q86XA9	HEAT repeat-containing protein 5A	HEATR5A	0	0	0	0	0	0	0	0	0	0	0	0	11615000	1	1	1	1.3	1.3	1.3	97.033	0.0053788	2.2238	62509000	4
F5H6E2;O00159	Unconventional myosin-Ic	MYO1C	122260000	117700000	0	163430000	132670000	0	117130000	102330000	97337000	87724000	80992000	0	0	13	13	13	15	15	15	118.99	0	31.443	1110800000	42
F5H6L7;Q9UPR5	Sodium/calcium exchanger 2	SLC8A2	0	0	86725000	0	0	0	0	0	0	0	0	0	0	5	5	5	11.2	11.2	11.2	74.398	0	10.408	189760000	8
G3V1U5;F5H6U7;Q9Y3E0	Vesicle transport protein GOT1B	GOLT1B	0	0	0	0	0	0	0	0	0	0	0	0	13051000	1	1	1	18.9	18.9	18.9	8.2139	0.00027064	5.0495	251700000	14
F5H6Z0;Q00537	Cyclin-dependent kinase 17	CDK17	0	0	19113000	0	0	0	0	0	0	0	0	0	0	4	2	2	9.8	5.3	5.3	53.533	0.0045558	2.3706	29997000	5
F5H785;P0DI82;P0DI81	Trafficking protein particle complex subunit 2B;Trafficking protein particle complex subunit 2	TRAPPC2;TRAPPC2B	0	0	0	0	0	0	0	0	0	0	0	0	31925000	1	1	1	10.6	10.6	10.6	13.381	0.0036697	2.4283	457000000	14
F5H7S3;B7Z596		TPM1	1302000000	1571699968	1634099968	1016899968	1384999936	1197699968	1420700032	1049600000	1553400064	1116300032	1203100032	1315600000	1265799936	19	14	2	57.6	46.5	7.3	28.524	0	323.31	17952000000	102
F5H8H2;Q03426;A0A1B0GWC2	Mevalonate kinase	MVK	47779000	59211000	0	30110000	47289000	0	0	0	0	0	0	0	0	4	4	4	21.2	21.2	21.2	37.171	0	10.179	372630000	18
F6QDS0;I3L352		DDX19A	365030016	281110016	410520000	431300000	354180000	400860000	339220000	511240000	336790016	461120000	300089984	293400000	372270016	16	16	0	45.1	45.1	0	54.017	0	63.619	4816500000	98
F6RY50;Q96FS4	Signal-induced proliferation-associated protein 1	SIPA1	0	0	0	0	0	0	0	0	0	0	0	0	253660000	2	2	2	2	2	2	101.82	0.0016783	2.9446	938800000	5
H0YFA9;H7C3P4;F6S8M0;P15586;F5H4C6	N-acetylglucosamine-6-sulfatase	GNS	0	0	0	0	0	0	0	0	0	0	0	18309000	0	2	2	2	6.9	6.9	6.9	34.608	0.0016766	2.9254	193350000	9
F6SYF8;Q9UBP4	Dickkopf-related protein 3	DKK3	91871000	160950000	150640000	116790000	179650000	144610000	172090000	0	0	106010000	0	0	0	4	4	4	17.6	17.6	17.6	39.95	0	16.913	1256100000	27
F6UJY1;Q5T013;E7EWH8;J9JIE9;A0A0A0MTR5;H0YB70;F6UJY9;H0YB18	Putative hydroxypyruvate isomerase;Hydroxypyruvate isomerase	HYI	201580000	158200000	201690000	220260000	186970000	204160000	183130000	285300000	222100000	214060000	204800000	163770000	221400000	10	10	10	61.3	61.3	61.3	33.018	0	34.022	2774300000	67
F6VCX5;Q16816	Phosphorylase b kinase gamma catalytic chain, skeletal muscle/heart isoform	PHKG1	517489984	533000000	660700032	431169984	374350016	202320000	388590016	601169984	505100000	358729984	383540000	0	467489984	10	10	10	32.1	32.1	32.1	45.464	0	23.381	5720300000	47
F6VRR5;Q9BY77	Polymerase delta-interacting protein 3	POLDIP3	0	0	0	0	0	0	0	0	0	0	0	0	11198000	1	1	1	3	3	3	48.103	0.00026896	4.8838	291940000	13
F8VR33;H0YIV5;F8W1Z2;F8VP71;F8VZA2;Q6P1Q0;H0YHF4;F8VS60;F8VVQ3	LETM1 domain-containing protein 1	LETMD1	15207000	0	0	0	0	0	0	0	0	0	0	0	0	3	3	3	31.2	31.2	31.2	12.233	0.00051746	4.0517	19659000	3
F8VPD4;P27708	CAD protein;Glutamine-dependent carbamoyl-phosphate synthase;Aspartate carbamoyltransferase;Dihydroorotase	CAD	217590000	203280000	238420000	229270000	274840000	205120000	222640000	248090000	240630000	173640000	221320000	227070000	217130000	23	23	23	13.4	13.4	13.4	236.02	0	43.663	3079400000	118
H3BMZ4;F8VVA0;F8VQD9;Q9BSB4	Autophagy-related protein 101	ATG101	0	0	12258000	0	0	0	0	0	0	0	0	0	0	1	1	1	20.2	20.2	20.2	9.5547	0.0012216	3.2085	24154000	2
F8VQQ4;F8VRZ4		TUBA1A	73107000	0	0	0	0	0	96978000	0	0	0	0	0	0	18	1	1	67.6	11	11	24.221	0	28.834	363410000	10
F8VUA2;F8VVT7;Q9HD42	Charged multivesicular body protein 1a	CHMP1A	0	76757000	0	81225000	0	0	0	0	0	93084000	0	0	83479000	3	3	3	14.4	14.4	14.4	19.531	0.00051921	4.0988	578380000	22
F8W118;F8VV59;F8VRJ2;B7Z9C2		NAP1L1	0	0	0	0	0	0	0	0	0	0	0	30949000	0	12	1	1	54.5	6.2	6.2	24.694	0.0051674	2.2604	376310000	10
F8VVA7;P61923;F8VXB1;F8W156;F8W651;F8VYZ4;F8VUC5;F8VXR1	Coatomer subunit zeta-1	COPZ1	191690000	152400000	153040000	220220000	244080000	231740000	209300000	173820000	140090000	159340000	156360000	0	157960000	6	6	6	39.4	39.4	39.4	22.34	0	33.99	2435400000	32
F8VVM2		SLC25A3	0	0	0	0	0	0	0	0	0	0	0	40467000	0	9	1	1	36.7	8.3	8.3	36.161	0	42.287	196580000	4
J3KNM6;F8VVT9;Q99490	Arf-GAP with GTPase, ANK repeat and PH domain-containing protein 2	AGAP2	48309000	65742000	0	0	0	0	65788000	0	0	0	0	0	0	9	9	9	13.3	13.3	13.3	108.53	0	28.851	617330000	22
F8VVX6;Q5HYK3;F8VP53;F8VVW7	2-methoxy-6-polyprenyl-1,4-benzoquinol methylase, mitochondrial	COQ5	118890000	0	0	104950000	0	0	120120000	0	102270000	0	102160000	0	98740000	5	5	5	28.2	28.2	28.2	24.5	0	13.563	941150000	29
F8VW41;Q86VP3	Phosphofurin acidic cluster sorting protein 2	PACS2	0	116510000	0	95331000	127810000	0	0	0	107000000	130530000	0	0	100710000	9	8	8	11.9	11.1	11.1	94.426	0	15.988	1018200000	33
F8VXC8;Q8TAQ2	SWI/SNF complex subunit SMARCC2	SMARCC2	198480000	177570000	191600000	186930000	212790000	210210000	166170000	175770000	150620000	125540000	172840000	175540000	138330000	13	13	13	12.8	12.8	12.8	136.18	0	34.251	2308500000	64
F8WAK2;F8VXI9;Q14161;R4GNG3;F8W822	ARF GTPase-activating protein GIT2	GIT2	0	0	0	0	0	0	0	0	52087000	0	0	96444000	0	9	7	7	20.6	17	17	76.045	0	33.664	584550000	19
F8VYE8;P36873;F8VR82;F8W0W8;A0A087WYY5	Serine/threonine-protein phosphatase;Serine/threonine-protein phosphatase PP1-gamma catalytic subunit	PPP1CC	385500000	281140000	414910016	332640000	400960000	316550016	269990016	280840000	316609984	254470000	361300000	0	324120000	17	3	3	56.9	7.9	7.9	34.95	0	24.175	4293100000	32
F8VYY9;P54619;H0YIC9	5-AMP-activated protein kinase subunit gamma-1	PRKAG1	185470000	208570000	224400000	161230000	185960000	193200000	116500000	214240000	200140000	104730000	317400000	349480000	102930000	7	7	7	36.4	36.4	36.4	31.905	0	76.087	2765800000	61
F8VZH8;F8W0P6;F8W059;Q9UPW8	Protein unc-13 homolog A	UNC13A	57612000	0	0	35618000	0	0	0	0	0	0	0	0	67894000	8	8	5	5.4	5.4	3.5	190.06	0	9.8943	279330000	27
F8VZX2;H3BRU6;F8W0G4;F8VXH9		PCBP2	0	0	0	0	0	0	0	0	49951000	0	0	0	0	13	1	0	69.5	9.3	0	33.8	0	12.697	134420000	2
F8W031;F8VXJ7;F8W1K5		CNPY2	194920000	213320000	202890000	200080000	215060000	211210000	184580000	168870000	0	156550000	176150000	153080000	175350000	5	4	0	25.1	21.7	0	29.224	0	15.736	2411800000	41
F8W0P7		ATP5B	0	0	0	0	0	0	0	0	0	31855000	0	0	0	10	1	1	53.7	7	7	28.392	0.0099783	1.9211	128190000	4
F8W1A4;P54819;F8VZG5;F8VY04;G3V213	Adenylate kinase 2, mitochondrial;Adenylate kinase 2, mitochondrial;Adenylate kinase 2, mitochondrial, N-terminally processed	AK2	581630016	626440000	812329984	789440000	687510016	651640000	627160000	621889984	744259968	595129984	799840000	584329984	675950016	13	13	13	66.4	66.4	66.4	25.63	0	164.6	9114800000	115
F8W1R7;G3V1V0;P60660;J3KND3;G8JLA2;B7Z6Z4;G3V1Y7;F8VPF3;F8VZU9;F8W180	Myosin light polypeptide 6	MYL6	2623600128	2568000000	2352900096	1997799936	2603200000	2177499904	2066499968	1494000000	1634700032	1145400064	1703100032	1548400000	1663399936	8	8	6	57.9	57.9	41.4	16.29	0	105.22	27927000000	132
F8W6I7;P09651;F8VZ49;Q32P51;F8VTQ5;F8W646;A0A2R8Y4L2	Heterogeneous nuclear ribonucleoprotein A1;Heterogeneous nuclear ribonucleoprotein A1, N-terminally processed;Heterogeneous nuclear ribonucleoprotein A1-like 2	HNRNPA1;HNRNPA1L2	8019999744	8466299904	8739900416	6992600064	6580299776	8956900352	6346699776	6255600128	6344999936	5890999808	6329699840	6177999872	5861600256	22	21	21	60.9	60.9	60.9	33.155	0	323.31	96689000000	392
F8W6L3;G5E9S8;G3V2E7;G3V3H3;G3V5R9;E7EVH7;Q07866	Kinesin light chain 1	KLC1	2180199936	2213799936	1740700032	2127800064	2109400064	2198700032	1936400000	1741100032	1628700032	2410200064	1608800000	1667600000	1846099968	31	31	20	55.2	55.2	36.3	65.485	0	310.03	25249000000	326
F8W733;Q9NXR7;C9J2G0;A0A075B7D2	BRCA1-A complex subunit BRE	BRE	0	0	0	0	0	0	0	0	0	0	0	0	64513000	2	2	2	8.8	8.8	8.8	31.972	0.00075988	3.6963	685060000	14
F8W7Q4;Q96A26;E9PH05	Protein FAM162A	FAM162A	296630016	256740000	0	293190016	0	296900000	181560000	0	0	0	247530000	0	0	5	5	5	32.6	32.6	32.6	16.515	0	20.003	1966300000	32
F8W7U8;P49959;F5GXT0	Double-strand break repair protein MRE11A	MRE11A	0	0	0	0	94906000	0	0	0	0	0	56704000	0	0	8	8	8	16.5	16.5	16.5	80.521	0	11.099	465020000	24
F8W881;Q9NX05	Constitutive coactivator of PPAR-gamma-like protein 2	FAM120C	0	0	0	0	0	0	0	0	0	0	0	46151000	0	3	3	3	4.8	4.8	4.8	99.351	0.00051308	3.8925	97087000	8
F8W914	Reticulon	RTN4	0	0	0	0	0	0	0	0	0	0	0	0	45705000	9	1	1	44.3	4.1	4.1	37.144	0.0012261	3.2591	550280000	11
F8W9F9;H0Y7T5;Q9Y3S1;A6PVV2;H0Y7R3	Serine/threonine-protein kinase WNK2	WNK2	0	0	0	0	78515000	0	181540000	104510000	111300000	0	128290000	106530000	101570000	11	11	9	5.3	5.3	4.5	234.38	0	11.824	1083000000	35
F8W9S7;Q14C86	GTPase-activating protein and VPS9 domain-containing protein 1	GAPVD1	113300000	129210000	106390000	122850000	108980000	0	134540000	95328000	106070000	0	108030000	100580000	100450000	11	11	11	11.3	11.3	11.3	157.46	0	37.119	1402400000	38
F8W9U4	Microtubule-associated protein	MAP4	149160000	301080000	0	384990016	244480000	335009984	112270000	255330000	326800000	0	162500000	192470000	230510000	23	15	9	33.6	21.7	14.5	88.276	0	82.764	2946600000	89
F8W9X7;Q567U6	Coiled-coil domain-containing protein 93	CCDC93	0	0	0	347760000	0	375590016	0	265390000	0	357840000	271070016	0	0	4	4	4	7.1	7.1	7.1	73.041	0.00028345	5.9853	3302300000	25
F8WA11;Q7Z460;H0Y5T1	CLIP-associating protein 1	CLASP1	175600000	237380000	161100000	133050000	172100000	87915000	189850000	89193000	128960000	104170000	259720000	175130000	96797000	24	17	17	20.8	16	16	162.76	0	42.36	2156800000	84
F8WA39;Q13613;H0YDX3;Q8NEC6	Myotubularin-related protein 1	MTMR1	181080000	179410000	134670000	149860000	160270000	166500000	206210000	139500000	152150000	180480000	177680000	194400000	200540000	10	10	10	23.6	23.6	23.6	75.717	0	38.458	2289100000	73
J3QRU4;F8WCA0;L7N2F9;P63027	Vesicle-associated membrane protein 2	VAMP2	4199000064	3441400064	3849299968	5225900032	2857100032	4910300160	3260100096	3113200128	2755300096	2886400000	2923800064	2182700032	3929799936	7	7	4	61.9	61.9	40.7	12.251	0	323.31	47444000000	185
F8WCF6;P59998;R4GN08;F8WDD7;H7C0A3;A0A0A6YYG9	Actin-related protein 2/3 complex subunit 4	ARPC4-TTLL3;ARPC4	2198400000	2038899968	2279399936	2337600000	2326899968	2268000000	2374400000	2724400128	2393400064	2444800000	2643500032	2759000064	2451899904	9	9	9	61.9	61.9	61.9	21.058	0	47.356	33047000000	136
F8WD64;Q69YW2	Protein stum homolog	C1orf95	0	0	0	0	0	0	0	0	0	0	0	0	0	1	1	1	12.1	12.1	12.1	14.968	0.0027739	2.5354	0	3
F8WE43;F8WF23		SYNPR	0	134410000	136680000	0	84167000	0	125880000	146480000	121370000	0	151770000	119180000	128710000	3	3	3	70.6	70.6	70.6	3.6122	0	17.95	1602100000	33
F8WEC6		SLC25A17	0	0	0	0	0	0	0	0	0	0	0	0	62912000	1	1	1	11.5	11.5	11.5	16.418	0.0043389	2.3906	159470000	6
F8WJN3;Q16630	Cleavage and polyadenylation specificity factor subunit 6	CPSF6	315510016	310520000	386049984	359030016	382860000	297409984	286630016	290209984	315790016	195030000	529790016	255530000	254550000	8	8	8	23	23	23	52.269	0	100.62	4421200000	67
G3V0I5;P49821;B4DE93	NADH dehydrogenase [ubiquinone] flavoprotein 1, mitochondrial	NDUFV1	5161099776	4601600000	4735399936	3984000000	3655000064	4633699840	4391399936	3222400000	3951200000	3780900096	4678700032	4610299904	4020900096	25	25	25	65.4	65.4	65.4	50.054	0	199.33	57715000000	276
G3V169;P29466;H0YEC7;B4DVD8	Caspase;Caspase-1;Caspase-1 subunit p20;Caspase-1 subunit p10	CASP1	0	0	0	47114000	0	0	0	0	0	0	0	0	0	4	4	4	14.4	14.4	14.4	40.943	0.00027027	5.0111	180830000	12
G3V198;Q12769;E9PR16	Nuclear pore complex protein Nup160	NUP160	49577000	54128000	39430000	52621000	65218000	0	49336000	50898000	69819000	0	59870000	84950000	65820000	6	6	6	6.5	6.5	6.5	148.86	0	22.772	692400000	34
G3V1A6;P57764;E9PIB2	Gasdermin-D	GSDMD	18506000	41694000	37224000	0	86704000	0	0	0	37787000	0	95788000	0	0	4	4	4	9.2	9.2	9.2	57.734	0	45.865	464280000	23
G3V1C3;Q9BZZ5	Apoptosis inhibitor 5	API5	236740000	289300000	351409984	282329984	252860000	201640000	198770000	286420000	330390016	262890000	293180000	349470016	0	10	10	6	24.5	24.5	14.5	57.56	0	149.41	3573700000	74
G3V1L9;Q07157;A0A087X0K9;G5E9E7	Tight junction protein ZO-1	TJP1	539249984	578310016	570499968	840689984	770929984	654579968	646480000	831059968	748950016	745769984	699340032	753020032	682289984	32	32	32	26.1	26.1	26.1	197.46	0	323.31	9036300000	221
G3V1N2		HBA2	0	0	138420000	0	0	109850000	0	0	0	0	0	0	0	13	1	1	94.5	7.3	7.3	11.948	0	12.321	548530000	5
G3V1P3;Q969J3	Loss of heterozygosity 12 chromosomal region 1 protein	LOH12CR1	0	0	0	0	0	0	0	0	0	0	0	0	63561000	3	3	3	19.8	19.8	19.8	20.247	0.00051427	3.9459	220780000	11
G3V1S3;Q6ZUT9;H0YDV6;H0YGE5;B4DFB6	DENN domain-containing protein 5B	DENND5B;DENND5A	0	0	49279000	0	0	0	0	0	0	0	0	0	0	2	2	1	1.8	1.8	0.5	149.34	0.0002805	5.7574	91785000	5
G3V200;O75334;H0YHK3	Liprin-alpha-2	PPFIA2	414630016	403110016	435969984	399750016	329209984	343840000	422240000	298089984	233490000	170700000	336660000	361830016	274649984	20	20	16	19.3	19.3	15.4	142.11	0	65.781	4730400000	125
G3V203;H0YHA7;J3QQ67;Q07020;F8VUA6;F8VYV2;A0A075B7A0	60S ribosomal protein L18	RPL18	0	0	0	50716000	0	0	0	0	0	0	0	0	0	4	4	4	27.4	27.4	27.4	18.756	0.00075491	3.6152	229560000	8
H0YJN9;G3V2T4;G3V4E4;Q99538	Legumain	LGMN	0	0	0	0	0	0	0	0	0	0	0	0	31622000	1	1	1	18.7	18.7	18.7	9.658	0	16.787	159730000	5
G3V5R3;G3V3A4;Q13573	SNW domain-containing protein 1	SNW1	0	0	0	0	0	20235000	0	0	0	0	0	0	0	1	1	1	11.9	11.9	11.9	20.974	0.0021067	2.6766	18072000	1
G3V424;Q4LDG9;G3V389;G3V5I4;H0YM28;H0YJD6;G3V2M0	Dynein light chain 1, axonemal	DNAL1	0	0	0	0	0	0	0	0	0	0	0	0	41560000	2	2	2	21.7	21.7	21.7	15.711	0.0012234	3.2275	77164000	7
G3V441;G3V4H8;Q8N8R3	Mitochondrial basic amino acids transporter	SLC25A29	0	0	0	0	0	0	0	0	0	0	0	20701000	0	1	1	1	71.4	71.4	71.4	3.399	0.00029499	7.0949	113230000	4
G3V5A9;G3V4B7;H0YJC7;Q92843	Bcl-2-like protein 2	BCL2L2	0	0	0	0	0	28897000	0	0	0	0	0	0	0	1	1	1	13.2	13.2	13.2	15.65	0.0051872	2.287	25808000	1
G3V4F7;P61011	Signal recognition particle 54 kDa protein	SRP54	0	0	0	93863000	59633000	93397000	0	0	98976000	0	106460000	0	102420000	6	6	6	16.1	16.1	16.1	48.67	0	12.297	933440000	23
G3V4K3;Q9H9C1	Spermatogenesis-defective protein 39 homolog	VIPAS39	0	30878000	33424000	0	22176000	0	0	0	0	0	0	0	0	3	3	3	7.7	7.7	7.7	59.718	0.00029155	6.8157	181030000	12
G3V583;Q8N128;G3V3Z5	Protein FAM177A1	FAM177A1	0	0	90814000	80986000	0	0	0	0	0	0	96154000	0	0	2	2	2	17.9	17.9	17.9	16.322	0.0077314	2.0786	562690000	14
J3KMW2;G3V5I2;Q9UEU0	Vesicle transport through interaction with t-SNAREs homolog 1B	VTI1B	0	0	0	0	0	0	0	0	0	0	0	20808000	0	1	1	1	27.3	27.3	27.3	4.7702	0.005193	2.2962	66511000	8
G3V5N8;Q9HBF4	Zinc finger FYVE domain-containing protein 1	ZFYVE1	0	33595000	0	0	0	0	0	0	0	0	0	0	0	4	4	4	7.7	7.7	7.7	88.422	0.00099354	3.4382	85898000	7
G3V5Z3;Q6IN85;G3V5A2;H0YIY8	Serine/threonine-protein phosphatase 4 regulatory subunit 3A	SMEK1	0	0	0	0	0	0	0	0	0	0	54538000	0	0	3	3	2	5	5	3	82.03	0.0012092	3.0541	147820000	5
G3V5Z7;P60900;G3V295;G3V3I1	Proteasome subunit alpha type;Proteasome subunit alpha type-6	PSMA6	2204100096	2094300032	2134499968	2194800128	2068000000	2080700032	1834000000	2105900032	1861900032	2147899904	1859000064	1940099968	2085299968	16	16	16	58.7	58.7	58.7	28.147	0	146.37	27344000000	161
G3XAH0;B4DJ62;C9JM82;E7EPG2		2005-09-01	0	0	0	0	0	0	0	0	0	0	0	0	84783000	18	1	1	49.7	2.4	2.4	43.845	0.006869	2.1268	930330000	16
G3XAI2;P07942;E7EPA6	Laminin subunit beta-1	LAMB1	0	0	0	306950016	594880000	0	0	275289984	269880000	254070000	218560000	403300000	195080000	12	12	12	9.7	9.7	9.7	200.48	0	34.293	1932800000	37
G5E953;Q13615	Myotubularin-related protein 3	MTMR3	0	0	0	0	0	369480000	0	0	337800000	127870000	150700000	0	0	4	4	4	4.8	4.8	4.8	117.57	0.00026925	4.9117	1133300000	21
G5E972;P42167;P42166	Lamina-associated polypeptide 2, isoforms beta/gamma;Thymopoietin;Thymopentin;Lamina-associated polypeptide 2, isoform alpha;Thymopoietin;Thymopentin	TMPO	281060000	312440000	207640000	164250000	237890000	0	0	254570000	266940000	259660000	246250000	241470000	179880000	7	7	7	26.3	26.3	26.3	46.306	0	37.299	2893700000	53
G5E9A6;P51784	Ubiquitin carboxyl-terminal hydrolase;Ubiquitin carboxyl-terminal hydrolase 11	USP11	480620000	540480000	400060000	416180000	498520000	484849984	418190016	392860000	338960000	338409984	299609984	369120000	312550016	24	24	22	36.1	36.1	35.1	105.03	0	185.64	5456600000	124
G5E9G7;Q9P2S2	Neurexin-2	NRXN2	15277000	0	0	0	0	0	0	0	0	0	0	0	0	5	2	2	3.3	1.4	1.4	184.11	0.00099182	3.4142	106810000	12
G5E9P3;Q9NYS0	NF-kappa-B inhibitor-interacting Ras-like protein 1	NKIRAS1	0	0	0	0	0	0	0	0	0	0	61259000	0	0	3	3	3	16.1	16.1	16.1	21.644	0.0012133	3.0974	402600000	18
G5E9Q6;C9J0J7;C9JQ45;C9J2N0	Profilin	PFN2	1764499968	1738899968	1794700032	1134700032	1929299968	1795900032	2060300032	3245299968	3168999936	2290899968	2788900096	2888900096	3055899904	9	9	3	60.6	60.6	9.6	20.787	0	197.03	31128000000	145
G5E9U9;Q9H0J9	Poly [ADP-ribose] polymerase 12	PARP12	0	0	0	0	0	0	0	0	25526000	0	0	0	0	3	2	2	10.5	8.6	8.6	47.485	0.000518	4.0621	111620000	5
G5E9W7;G5E9V5;P82650;H7C5L9;H7C5F2;H7C5H3	28S ribosomal protein S22, mitochondrial	MRPS22	0	0	0	0	0	0	0	0	94456000	0	0	92816000	91378000	8	8	8	32.9	32.9	32.9	36.805	0	11.656	575270000	20
G5E9V7;G5E9V6;Q8IUR7;B7Z637;C9J8P8;C9JAA7	Armadillo repeat-containing protein 8	ARMC8	0	0	0	0	0	0	0	0	0	0	30534000	0	0	5	5	5	26.1	26.1	26.1	39.785	0	34.401	217660000	11
G5E9W9;Q9NUV9	GTPase IMAP family member 4	GIMAP4	0	0	84203000	104130000	0	0	0	0	0	93998000	89672000	0	74614000	5	5	5	14.9	14.9	14.9	39.033	0	12.716	624850000	23
G5EA06;Q92552;D6RH20;D6RJC7	28S ribosomal protein S27, mitochondrial	MRPS27	66753000	0	0	0	0	0	0	0	0	0	57778000	0	0	5	5	5	16.2	16.2	16.2	41.329	0.00029053	6.7583	336590000	19
G5EA09		SDCBP	0	0	0	0	0	35773000	0	0	0	0	0	0	0	7	1	1	41.8	5.3	5.3	34.819	0.0075271	2.1079	31950000	1
G5EA30;Q92879;E9PQK4;E9PSH0;E9PKU1	CUGBP Elav-like family member 1	CELF1	91914000	85844000	83982000	83343000	0	73336000	65384000	0	0	82672000	0	0	0	6	5	5	10.3	8.4	8.4	55.142	0	9.4236	637460000	25
X6RM00;G8JLD3;X6RLX0;Q8IUD2	ELKS/Rab6-interacting/CAST family member 1	ERC1	54774000	0	0	0	63783000	0	0	0	0	0	0	0	0	13	7	7	14.4	9.4	9.4	111.97	0	13.138	511390000	27
G8JLD5		DNM1L	129580000	138940000	87427000	120780000	116580000	108710000	0	92681000	92007000	83590000	128060000	0	139780000	42	3	3	73.5	5.9	5.9	79.621	0	76.57	1326900000	23
H0UI06;P14406;D6R9C3;D6RIE3;D6RGV5	Cytochrome c oxidase subunit 7A2, mitochondrial	COX7A2	0	0	114340000	0	0	0	0	534340000	0	0	0	844990016	795139968	3	3	3	40.9	40.9	40.9	12.844	0	7.4721	3386700000	17
X6RLT1;H0UI80;Q8IXH7	Negative elongation factor C/D	NELFCD;TH1L	0	0	0	0	0	0	0	0	0	0	0	0	10139000	2	2	2	4.6	4.6	4.6	66.432	0.00051827	4.0714	47303000	7
H0Y2S9;H0Y7E2		MPRIP	178430000	162430000	0	0	0	220690000	165060000	119760000	201150000	0	72384000	0	606040000	17	17	8	13.7	13.7	6.8	203.37	0	36.705	2115400000	46
H0Y2W2		ATAD3A	344840000	315380000	342120000	224960000	164270000	258750000	251940000	296540000	358100000	294080000	423049984	354969984	316169984	11	11	1	25	25	2.1	64.243	0	50.008	4085300000	77
H0Y2X5;P47895;H0YNQ3	Aldehyde dehydrogenase family 1 member A3	ALDH1A3	0	35643000	0	0	0	0	0	0	0	0	0	0	0	4	2	2	7.7	5.4	5.4	44.256	0.0019039	2.8488	119220000	9
H0Y2Y8;Q15942	Zyxin	ZYX	238150000	190580000	229020000	449540000	305430016	176970000	162010000	249050000	228300000	312230016	274320000	148920000	248420000	14	14	14	40.7	40.7	40.7	57.643	0	107.19	3261600000	60
Q5QPK2;H0Y368;O60762;Q5QPJ9	Dolichol-phosphate mannosyltransferase subunit 1	DPM1	0	34934000	0	0	0	0	0	0	0	0	67312000	0	0	3	3	3	14.3	14.3	14.3	32.426	0.00050916	3.7704	221540000	12
H0Y3A8;O75129	Astrotactin-2	ASTN2	0	0	49605000	0	0	0	0	0	0	0	0	0	0	3	3	3	4.3	4.3	4.3	118.83	0.0002681	4.8198	272810000	11
H0Y3V4		IPO5	0	0	0	0	0	0	0	0	27565000	0	0	0	0	7	1	1	59.9	13.2	13.2	20.487	0.0009928	3.433	30024000	1
H0Y449;P67809	Nuclease-sensitive element-binding protein 1	YBX1	88578000	142610000	118340000	150420000	98658000	154240000	122780000	0	87591000	112060000	78142000	0	0	3	3	3	15.2	15.2	15.2	41.905	0	173.1	1228800000	30
H0Y465;P21359;J3KSB5	Neurofibromin;Neurofibromin truncated	NF1	40686000	44551000	0	0	0	0	0	0	0	0	0	59121000	0	6	6	6	4	4	4	281.21	0.0002727	5.2328	319030000	22
H0Y4B0;O43414;A0A3B3ISV9;F6QUN3	ERI1 exoribonuclease 3	ERI3	293769984	351640000	331100000	298000000	296190016	343409984	292270016	307089984	271820000	211040000	289800000	342289984	308009984	6	6	6	34.2	34.2	34.2	22.649	0	21.978	4324100000	80
H0Y507;Q5TCZ1	SH3 and PX domain-containing protein 2A	SH3PXD2A	0	0	0	0	0	0	0	4001100	0	0	0	0	0	2	2	2	2.5	2.5	2.5	116.37	0.0018815	2.7532	75164000	2
H0Y517;H7C1U3;Q5T0F9	Coiled-coil and C2 domain-containing protein 1B	CC2D1B	0	0	33208000	0	0	63575000	40400000	43115000	38731000	0	0	0	0	3	3	3	6.7	6.7	6.7	69.548	0.00028711	6.3683	301820000	15
H0Y542;O75363;H7C1E7;G3XAF7	Breast carcinoma-amplified sequence 1	BCAS1	286270016	281400000	0	0	273760000	260510000	287180000	0	0	177390000	176710000	147110000	0	6	6	6	17.2	17.2	17.2	51.104	0	99.692	2019800000	27
H0Y599;Q8N1I0;F5GXW1;H0Y7H7	Dedicator of cytokinesis protein 4	DOCK4	105540000	115100000	0	121640000	170820000	0	108490000	171950000	164440000	0	209350000	200660000	112140000	15	15	14	10.9	10.9	10.5	228.52	0	93.641	1700100000	57
H0Y6F5;Q9H4I2	Zinc fingers and homeoboxes protein 3	ZHX3	0	0	0	0	0	91319000	0	0	0	0	0	0	0	1	1	1	3.2	3.2	3.2	75.085	0.0045413	2.3441	98918000	2
H0Y704;O15231;H7BZT5	Zinc finger protein 185	ZNF185	0	0	0	0	0	0	0	0	0	0	0	0	0	2	2	2	5.6	5.6	5.6	47.401	0.0018788	2.7284	0	3
P0DP25;P0DP24;P0DP23;H0Y7A7;E7ETZ0;E7EMB3;Q96HY3;M0QZ52;G3V361		CALM2;CALM1;CALM3	21059999744	13578000384	10798000128	7229799936	8002400256	9127199744	7822400000	2200600064	4277700096	3054799872	7801099776	5429000192	5939700224	14	14	12	85.2	85.2	80.5	16.837	0	323.31	112790000000	254
H0Y7Q1;O75689;A0A087WTN6;H7C324;A0A3B3ISA7;H7BZT6;H7C4B3;H7C264	Arf-GAP with dual PH domain-containing protein 1	ADAP1	181990000	0	0	0	0	0	0	141530000	153500000	0	151640000	221950000	0	10	10	10	37	37	37	41.024	0	18.784	1276600000	37
H0Y7V4;A0A075B6F3;Q96JB1	Dynein heavy chain 8, axonemal	DNAH8	0	0	0	0	0	0	0	0	0	386289984	0	0	0	4	4	3	1.1	1.1	0.9	478.87	0.0051616	2.2485	782790000	6
H0Y8B3	Adenosylhomocysteinase	AHCYL2	0	0	0	0	0	0	0	63142000	0	0	0	0	0	23	2	2	56.2	2.3	2.3	58.004	0.0062112	2.1398	333100000	5
H7C380;H0Y8P0;Q86TI0;H0YA01;H7C0Z7;C9JIE2	TBC1 domain family member 1	TBC1D1	0	0	0	19108000	0	0	0	0	0	0	0	0	0	2	2	2	9.7	9.7	9.7	25.383	0.0019043	2.8497	78087000	11
H0Y8X4;O43598	2-deoxynucleoside 5-phosphate N-hydrolase 1	DNPH1	828710016	925430016	1003699968	823459968	872289984	841689984	947500032	1221100032	1196300032	1160899968	1192499968	1070800000	1303399936	9	9	9	52.3	52.3	52.3	25.868	0	164.22	13933000000	113
H0Y931		ANK2	0	148930000	0	0	0	0	141460000	95486000	0	0	0	0	0	39	2	0	52	2.4	0	108.62	0.00027739	5.5272	682910000	15
H0Y9C2		CAMK2D	0	0	0	0	0	0	0	0	0	63985000	0	0	0	12	1	1	68.6	8.2	8.2	22.126	0.00099256	3.4323	146750000	5
H0Y9D9;J3KN18;Q7Z5Q1;Q8NE35;E5RFP2;E5RJM0;B7ZLQ8;Q17RY0	Cytoplasmic polyadenylation element-binding protein 2;Cytoplasmic polyadenylation element-binding protein 3;Cytoplasmic polyadenylation element-binding protein 4	CPEB2;CPEB3;CPEB4	69112000	80539000	60489000	55420000	0	63198000	68411000	0	0	0	0	0	0	4	4	4	30.5	30.5	30.5	18.644	0.00028385	6.0308	509100000	23
H0YAA3;Q9HAD4;D6RJA5;H0Y9Z3	WD repeat-containing protein 41	WDR41	0	0	0	0	0	0	0	0	0	0	0	0	22131000	3	3	3	9.4	9.4	9.4	44.495	0.0016722	2.8993	25987000	3
H0YAN7;Q86XE3	Calcium uptake protein 3, mitochondrial	MICU3	0	67059000	0	0	0	0	119540000	0	47067000	0	88915000	92863000	0	2	2	2	8	8	8	43.942	0	7.2057	504960000	12
H0YAV9;Q9UIV1;H0YBT3	CCR4-NOT transcription complex subunit 7	CNOT7	0	0	0	0	0	0	0	0	0	0	0	0	13902000	3	3	3	19.2	19.2	19.2	24.13	0.00028098	5.8099	242540000	10
H0YBZ2;P04233;H0YBZ8;E7ESL3	HLA class II histocompatibility antigen gamma chain	CD74	0	0	90729000	85284000	52771000	0	0	0	36927000	154730000	0	68202000	0	3	3	3	11.7	11.7	11.7	34.979	0.00028027	5.7342	625390000	19
H0YC24;Q9H6X2	Anthrax toxin receptor 1	ANTXR1	0	0	0	0	0	0	95851000	0	0	0	0	0	0	1	1	1	12.3	12.3	12.3	19.738	0.00028935	6.666	104840000	1
H0YD13;P16070;H0Y2P0;H0YE40;H0Y5E4	CD44 antigen	CD44	1972600064	2045100032	2637100032	3208199936	1965699968	1975500032	2166799872	2911399936	3387200000	2647800064	2426700032	1627000064	2807800064	8	8	8	52.4	52.4	52.4	22.683	0	84.66	33297000000	153
H0YD14;Q9NZM1	Myoferlin	MYOF	0	0	0	19270000	0	0	0	0	0	0	0	0	0	2	2	2	2.4	2.4	2.4	134.71	0.00099034	3.3994	18989000	2
H0YD93;Q8WXA3	RUN and FYVE domain-containing protein 2	RUFY2	0	0	91970000	0	0	0	0	0	0	0	0	0	0	5	3	3	9.4	5.2	5.2	71.323	0.0012104	3.0597	418200000	9
H0YDG2;Q9UKW4;F5H5P4;Q96D37;A0A0A0MR07;P15498	Guanine nucleotide exchange factor VAV3;Proto-oncogene vav	VAV3;VAV1	0	0	0	0	0	0	0	0	0	0	0	11363000	0	2	2	2	3.7	3.7	3.7	71.387	0.0020935	2.613	23894000	5
H0YDR3;Q8N5M4;E9PKV8	Tetratricopeptide repeat protein 9C	TTC9C	0	106660000	0	0	0	0	0	0	0	0	0	117270000	0	2	2	2	42	42	42	8.1571	0.0005211	4.1552	735700000	13
H0YDU8;P53041;A8MU39	Serine/threonine-protein phosphatase;Serine/threonine-protein phosphatase 5	PPP5C	759580032	779710016	611500032	681110016	581289984	632590016	658630016	547400000	515340000	544750016	598729984	641480000	587929984	14	14	14	33	33	33	55.096	0	323.31	8369000000	117
H7C306;H0YER1;Q96T23	Remodeling and spacing factor 1	RSF1	0	0	0	0	0	0	0	0	0	34601000	0	0	0	2	2	2	14.4	14.4	14.4	22.812	0.00075434	3.6005	98330000	4
H0YET9		ARRB1	0	0	0	0	0	0	0	0	0	0	28803000	0	0	9	1	1	64.6	8.2	8.2	21.805	0.0014458	3.0142	291110000	13
H0YEX9;P57087	Junctional adhesion molecule B	JAM2	118900000	139210000	138970000	207960000	137240000	0	147360000	147490000	149480000	0	105120000	112170000	106090000	5	5	5	22.6	22.6	22.6	29.02	0	14.807	1739200000	33
H0YF29;Q6P1X6	UPF0598 protein C8orf82	C8orf82	0	75390000	0	0	102890000	0	66544000	0	109820000	0	0	74873000	65122000	5	5	5	24.5	24.5	24.5	28.487	0	22.721	892760000	25
H0YFD6;P40939;A0A2R8Y4F5;A0A2R8YG21	Trifunctional enzyme subunit alpha, mitochondrial;Long-chain enoyl-CoA hydratase;Long chain 3-hydroxyacyl-CoA dehydrogenase	HADHA	7535799808	6346599936	9823200256	7806300160	5876800000	7768300032	6737500160	6113900032	7428599808	8565799936	6699899904	6785399808	6693300224	34	34	34	58	58	58	86.371	0	323.31	100110000000	760
H0YFP0		CADPS	0	0	0	0	0	0	0	0	0	0	0	0	65716000	8	1	1	60.4	8.5	8.5	24.237	0.003228	2.4983	767190000	11
H0YG54;H0YGR4;Q9Y3B8	Oligoribonuclease, mitochondrial	REXO2	0	46877000	90749000	0	0	0	0	0	0	0	92902000	0	0	1	1	1	9.6	9.6	9.6	21.848	0	9.2218	464480000	10
H0YGT2;P20645	Cation-dependent mannose-6-phosphate receptor	M6PR	0	80065000	89899000	94319000	93256000	81443000	0	87560000	91304000	0	77690000	77886000	82845000	1	1	1	11.5	11.5	11.5	13.271	0	26.84	984420000	26
H0YGW7;Q8NE71	ATP-binding cassette sub-family F member 1	ABCF1	0	0	78489000	0	0	0	84210000	0	0	0	0	0	0	4	4	4	7.9	7.9	7.9	67.55	0	8.3	396590000	14
H0YI08;Q9Y6F6;E9PJ61	Protein MRVI1	MRVI1	0	0	0	0	0	0	0	0	121130000	0	0	0	0	8	8	8	12.4	12.4	12.4	89.691	0	28.62	348720000	15
H0YI09;Q9H8H3;F8VQX6	Methyltransferase-like protein 7A	METTL7A	887539968	589710016	745340032	1004700032	408289984	927670016	922830016	1345200000	875400000	908179968	865500032	826569984	801340032	9	9	9	38.1	38.1	38.1	28.188	0	76.653	11536000000	77
H0YI72;Q7Z6G8;F8VR14	Ankyrin repeat and sterile alpha motif domain-containing protein 1B	ANKS1B	119640000	117540000	90461000	89209000	87333000	0	86853000	72667000	0	64649000	96535000	97366000	96376000	8	8	8	17.1	17.1	17.1	59.916	0	16.653	1077400000	43
H0YII4;H0YI90;Q5TDH0	Protein DDI1 homolog 2	DDI2	0	0	0	69952000	50346000	0	0	0	0	0	0	0	0	2	2	2	23.2	23.2	23.2	11.255	0.0095965	1.9617	356510000	12
H0YIE9;Q4G104;O94952	F-box only protein 21	FBXO21	0	0	0	36967000	0	0	0	0	0	0	0	0	0	5	5	5	18	18	18	59.162	0.00029326	6.9544	313660000	10
H0YJ75;Q13362;Q96B13	Serine/threonine-protein phosphatase 2A 56 kDa regulatory subunit gamma isoform	PPP2R5C	0	110870000	89273000	97388000	86121000	94438000	136190000	106080000	119110000	0	113700000	126640000	117850000	12	6	5	28.6	14.1	11.4	64.063	0	13.608	1371200000	49
H0YKJ4;H0YK48		TPM1	0	0	0	0	0	0	0	0	0	0	0	0	99575000	17	1	0	52	5.2	0	28.597	0	30.367	1386300000	15
S4R343;H0YLQ7;H0YK99;Q9NVM6	DnaJ homolog subfamily C member 17	DNAJC17	0	0	0	0	0	0	0	0	67546000	0	0	0	0	1	1	1	16.8	16.8	16.8	13.764	0.00027693	5.5013	100380000	2
H0YLP6;H0YMF4;H0YKD8;P46779	60S ribosomal protein L28	RPL28	0	0	0	0	75577000	0	0	0	0	0	0	0	0	3	3	3	36	36	36	9.657	0.00099231	3.4321	154530000	5
H0YM15;J3KNL7;Q8NBR6	Protein FAM63B	FAM63B	0	0	0	0	0	0	0	0	0	0	0	0	29138000	1	1	1	3.4	3.4	3.4	39.317	0.00026991	4.9815	357310000	12
H0YMG7;O94788	Retinal dehydrogenase 2	ALDH1A2	0	0	0	37129000	0	0	0	0	0	0	0	0	0	5	2	2	8.4	4.9	4.9	53.762	0.00075548	3.6258	58611000	6
H0YN26;P39687	Acidic leucine-rich nuclear phosphoprotein 32 family member A	ANP32A	1449600000	1306300032	581539968	1142599936	1258800000	1576800000	1012899968	686889984	803480000	1136800000	900769984	862200000	726990016	10	10	8	48.6	48.6	48.6	19.997	0	323.31	13314000000	104
H0YN81;Q9GZS3;H0YMF9;H0YL19	WD repeat-containing protein 61;WD repeat-containing protein 61, N-terminally processed	WDR61	234050000	242500000	229120000	206080000	214610000	185750000	284660000	276040000	286220000	306680000	381760000	285209984	274369984	12	12	12	61.6	61.6	61.6	32.253	0	66.736	3561200000	77
H0YNS9		GMPR2	0	0	0	0	0	0	0	0	0	0	0	0	0	5	1	1	80.8	17.6	17.6	12.794	0.0079348	2.0665	0	1
H0YNW7;Q96F32		GNB5	0	0	0	0	0	0	0	0	0	0	0	0	157010000	4	1	1	48	15	15	11.429	0	110.07	2126000000	13
H0YNX7;P30047	GTP cyclohydrolase 1 feedback regulatory protein	GCHFR	0	0	0	0	0	0	0	0	0	0	0	0	46505000	2	2	2	50.7	50.7	50.7	7.7668	0.0005226	4.2343	101600000	5
H3BLU2;Q13449;F5H5G1;C9J5G3	Limbic system-associated membrane protein	LSAMP	1215399936	1299100032	1720800000	1555900032	1768199936	1330400000	1772499968	1026300032	1139100032	1001200000	1215299968	810080000	1095200000	10	10	10	33.9	33.9	33.9	38.014	0	170.49	18400000000	118
H3BLX5;Q86UV5	Ubiquitin carboxyl-terminal hydrolase 48	USP48	0	0	0	0	0	0	0	10905000	0	0	0	0	0	1	1	1	13	13	13	13.252	0.0020916	2.6007	10329000	1
H3BNE1;H3BR18;H3BM38;H3BPJ0;O00161	Synaptosomal-associated protein;Synaptosomal-associated protein 23	SNAP23	0	36376000	0	0	0	0	0	0	0	0	0	0	0	3	3	3	39.2	39.2	39.2	11.14	0.00027586	5.4139	200720000	4
H3BM67;H3BUP2;H3BUN4;O60936	Nucleolar protein 3	NOL3	74050000	0	0	55443000	81233000	0	0	0	57198000	0	0	0	0	3	3	3	33.3	33.3	33.3	14.924	0.00028969	6.7067	407500000	14
H3BR08;H3BM92;H3BV34;H3BT06;H3BNY9;H3BRM0;O15305	Phosphomannomutase;Phosphomannomutase 2	PMM2	0	0	0	15143000	0	0	0	0	0	0	0	0	0	1	1	1	30.8	30.8	30.8	7.2823	0.00053362	4.7088	35562000	2
H3BV80;H3BMS0;H3BMM9;H3BTC0;Q15287;H3BPG5	RNA-binding protein with serine-rich domain 1	RNPS1	0	0	0	0	112260000	0	0	0	0	0	69775000	0	0	2	2	2	12.8	12.8	12.8	24.561	0	35.247	510320000	16
H3BPH8;H3BRT9;H3BMR6;H3BR92;H3BNQ1;H3BN97;H3BQ86		NDRG4	123240000	112640000	89564000	119140000	93009000	161110000	0	141500000	0	105730000	0	83993000	0	5	3	1	44.1	28.8	14.4	12.493	0	30.608	1162200000	41
H3BN98;I3L246		RPS15A	0	304280000	312430016	216440000	320790016	0	314380000	340800000	291769984	237870000	293750016	293510016	299200000	6	6	2	32.9	32.9	16	27.168	0	10.132	3567200000	33
H3BNC9;P08708;H0YN88;A0A075B716	40S ribosomal protein S17	RPS17	174210000	203260000	119550000	0	91239000	154350000	133040000	151990000	157860000	0	152760000	136200000	127340000	6	6	6	12	12	12	64.532	0	83.804	1973600000	46
H3BNU1;Q9ULP9;H3BV07;A0A2R8Y518	TBC1 domain family member 24	TBC1D24	627740032	641080000	657920000	683729984	672200000	528340000	640899968	581040000	641809984	663660032	661859968	687040000	695180032	17	17	9	39.2	39.2	19.3	62.317	0	56.005	8721800000	130
H3BS10;H3BP20;P06865;H3BU85;H3BTD4	Beta-hexosaminidase;Beta-hexosaminidase subunit alpha	HEXA	81867000	73735000	105680000	91205000	97184000	74754000	88134000	115910000	0	0	104030000	0	113340000	7	7	7	15.7	15.7	15.7	58.44	0	13.299	1095300000	30
H3BP71;O75150	E3 ubiquitin-protein ligase BRE1B	RNF40	0	0	0	0	210990000	0	0	0	0	0	0	0	0	3	3	2	3.2	3.2	1.8	109.05	0.0018801	2.7381	1407500000	6
H3BPE1;H3BQK9;Q9UPN3;H0Y390	Microtubule-actin cross-linking factor 1, isoforms 1/2/3/5	MACF1	150380000	301929984	1212499968	70041000	84610000	485489984	576889984	1522599936	1212999936	1333299968	2368199936	1613600000	667889984	106	105	101	18.7	18.6	17.8	856.87	0	323.31	12451000000	368
H3BPE7;P35637	RNA-binding protein FUS	FUS	816899968	803049984	662270016	746140032	631190016	714710016	549619968	495630016	415710016	530520000	428449984	453180000	353089984	7	7	5	15.4	15.4	12.7	53.496	0	44.82	7800300000	79
H3BQX6;H3BPK2;P25713	Metallothionein;Metallothionein-3	MT3	0	0	0	0	0	0	0	0	0	0	0	0	30331000	1	1	1	14.8	14.8	14.8	8.4116	0	8.8305	655540000	9
H3BQ53;Q9BQ70;Q9H7D3;H3BSP8;H3BSS3;Q9H384	Transcription factor 25	TCF25	0	0	0	0	0	0	0	0	0	0	0	0	13708000	2	2	2	6	6	6	64.732	0.00027218	5.1948	137870000	7
H3BQJ4;H3BPQ3		NDRG4	3419699968	3681499904	3656300032	2752100096	2526899968	2731899904	3808100096	3172999936	2497200128	2211500032	3287600128	2952000000	3172199936	11	11	0	55	55	0	35.903	0	323.31	41708000000	163
H3BQR0;H3BTA6;H3BSK1;H3BRI5;O95149	Snurportin-1	SNUPN	0	0	0	0	0	0	0	13853000	0	0	0	0	0	1	1	1	42.9	42.9	42.9	7.3231	0	12.083	13121000	1
H3BR29;H3BSM7;Q96GQ5	RUS1 family protein C16orf58	C16orf58	0	0	0	0	0	0	0	0	0	0	86547000	0	0	3	3	3	12.8	12.8	12.8	46.342	0	29.866	258670000	8
H3BRE8;Q9BWH6;H3BPY8;H3BPM3	RNA polymerase II-associated protein 1	RPAP1	0	0	0	0	0	0	33191000	0	0	0	0	0	0	2	2	2	2.2	2.2	2.2	123.07	0.0005152	3.9797	122590000	12
H3BRF9;Q96K21;H3BUW6;H3BN64;H3BRM1	Abscission/NoCut checkpoint regulator	ZFYVE19	0	0	0	62404000	0	0	0	0	0	0	0	0	0	2	2	2	5.1	5.1	5.1	49.203	0.0018859	2.7747	171530000	5
H3BRL0;Q9BXC9	Bardet-Biedl syndrome 2 protein	BBS2	33335000	0	0	0	0	0	0	0	0	0	0	0	0	3	3	3	5	5	5	74.627	0.008337	2.0278	112270000	10
H3BRL3;O14562	Ubiquitin domain-containing protein UBFD1	UBFD1	0	0	0	0	0	0	0	0	0	0	0	29367000	0	3	3	3	10	10	10	32.64	0.0021013	2.642	163950000	5
H3BRN4;P80404;H3BNQ7	4-aminobutyrate aminotransferase, mitochondrial	ABAT	14784000000	12060000256	13050000384	10659999744	9586199552	12549999616	11292999680	11004000256	10087000064	8440000000	12120999936	11525000192	11196999680	34	34	34	77.9	77.9	77.9	58.14	0	323.31	158540000000	619
H3BRQ0;Q96CD2	Phosphopantothenoylcysteine decarboxylase	PPCDC	0	0	0	0	0	0	0	0	0	0	0	0	18125000	1	1	1	9.9	9.9	9.9	18.703	0.0057842	2.1594	176620000	9
H3BRS6;Q9BRR6;H3BTH4;H3BN66	ADP-dependent glucokinase	ADPGK	0	0	0	23275000	0	0	0	0	0	0	0	0	0	2	2	2	13.2	13.2	13.2	21.805	0.00099157	3.4047	51349000	9
H3BRY5;P50225;P50226;E9PKW4;H3BQX5;E9PKR8;A0A0A6YYL2;P0DMN0;P0DMM9	Sulfotransferase;Sulfotransferase 1A1;Sulfotransferase 1A2;Sulfotransferase 1A4;Sulfotransferase 1A3	SULT1A1;SULT1A2;SULT1A4;SULT1A3	186800000	168170000	174580000	212530000	0	182490000	217490000	252080000	379120000	0	140910000	158360000	360420000	8	8	8	41.6	41.6	41.6	32.625	0	58.09	2622500000	51
H3BTB7;Q5JPH6	Probable glutamate--tRNA ligase, mitochondrial	EARS2	0	41452000	0	43152000	0	0	0	0	0	0	0	0	0	5	5	5	12.8	12.8	12.8	56.825	0	10.322	335160000	20
H3BTN5;H3BQ34	Pyruvate kinase	PKM	6359199744	5774900224	4834800128	4400099840	4436899840	4670199808	4533899776	4819599872	3287000064	5667100160	3546400000	4219500032	3960199936	40	5	0	75.9	10.9	0	53.045	0	238.05	65163000000	267
H3BU45;Q9Y4R8	Telomere length regulation protein TEL2 homolog	TELO2	0	0	0	0	0	0	0	0	0	0	3494200	0	0	1	1	1	10	10	10	17.488	0.0045631	2.3805	4577700	1
H3BU86;O14662;Q96NX8;F8W9Z6;B7ZBM8	Syntaxin-16	STX16-NPEPL1;STX16	70678000	0	0	0	66835000	93558000	0	0	47735000	0	0	0	0	5	5	5	20.4	20.4	20.4	43.229	0	16.557	602090000	21
H3BUU9;P55287	Cadherin-11	CDH11	0	0	0	0	0	0	73176000	0	0	0	0	0	0	2	2	2	4.6	4.6	4.6	73.792	0.00074757	3.4678	80037000	4
H3BUY0;Q7Z2W9;F5H7V8	39S ribosomal protein L21, mitochondrial	MRPL21	0	0	0	0	0	0	0	0	56585000	0	0	0	0	2	2	2	14.9	14.9	14.9	21.526	0.000508	3.7351	134240000	5
H3BV90;Q6FI81;H3BUG4;H3BT65;H3BQ23;H3BPG7	Anamorsin	CIAPIN1	96862000	110660000	0	122770000	0	0	0	64408000	0	0	73874000	81683000	99433000	5	5	5	22.8	22.8	22.8	26.446	0	7.7152	1223300000	25
H6UMI1;O95166	Gamma-aminobutyric acid receptor-associated protein	GABARAP	0	0	0	0	0	0	71239000	70842000	0	0	115540000	0	0	3	2	1	35.7	28.6	11.2	11.658	0.0005305	4.5503	595850000	13
H7C2Z6;H7BXD5;P28676;C9JIZ3	Grancalcin	GCA	303400000	307520000	368660000	345760000	334310016	282060000	303390016	352860000	267370000	286700000	293550016	250550000	297380000	8	8	8	56.2	56.2	56.2	16.712	0	35.918	4137500000	80
H7BXY3;Q7L2E3	Putative ATP-dependent RNA helicase DHX30	DHX30	39648000	0	0	0	0	0	0	43457000	45395000	0	0	59941000	0	7	7	7	7	7	7	130.55	0	30.526	326100000	29
H7BXZ5;J3QSW6;O60229;C9IZQ6	Kalirin	KALRN	0	0	0	0	0	0	0	0	56703000	0	0	0	41855000	8	5	4	3.7	2.7	2.3	336.17	0	22.466	360940000	17
H7BY35;Q92736	Ryanodine receptor 2	RYR2	0	63426000	0	0	0	0	0	0	0	0	0	0	0	3	3	3	1.1	1.1	1.1	562.6	0	20.135	379880000	8
H7BY57		NFASC	0	185380000	220660000	199720000	208160000	180570000	209620000	0	232320000	0	0	178680000	205590000	38	2	2	42.8	2.8	2.8	116.59	0	67.034	2440600000	30
Q5JRG1;H7BYF2;Q9BVL2	Nucleoporin p58/p45	NUPL1	0	0	0	0	0	90237000	0	0	0	0	0	0	0	3	3	3	11	11	11	49.095	0.00027809	5.6017	226350000	6
H7BYJ3;O14578	Citron Rho-interacting kinase	CIT	38438000	0	0	0	0	0	0	0	0	0	0	0	0	3	3	3	1.6	1.6	1.6	187.3	0.00098449	3.3101	90488000	12
H7BYR8		MBP	0	0	0	0	0	0	0	321280000	244630000	0	542449984	0	1077500032	9	1	1	33.9	5.9	5.9	25.742	0.00027518	5.3736	2768900000	9
H7BYX6;A0A087WTE4		NCAM1	276220000	314729984	469200000	271200000	347200000	367060000	453120000	448100000	729480000	0	346710016	370430016	866369984	28	1	0	48	1.5	0	80.282	0.0077297	2.0786	5923000000	31
H7BZ69;Q3SYG4	Protein PTHB1	BBS9	0	0	0	0	0	0	0	0	0	0	0	0	25066000	1	1	1	3.7	3.7	3.7	51.064	0.0058049	2.1791	46224000	3
H7BZ77;H7C0M8		TSC22D4	0	0	0	94492000	0	110700000	0	80975000	94726000	0	0	69252000	99909000	5	5	3	28.9	28.9	14.7	21.739	0	34.575	761320000	26
H7BZJ3		PDIA3	0	0	0	0	0	693100032	0	0	0	0	0	0	0	5	1	1	39	11.4	11.4	13.519	0	45.371	7393000000	17
H7BZK0;Q14BN4;C9JCH4;H7BZW9;B7Z863;B7Z964;H7C3M8	Sarcolemmal membrane-associated protein	SLMAP	112070000	0	0	0	0	0	0	0	259930000	0	0	0	0	3	3	3	8.5	8.5	8.5	50.263	0.00052056	4.1445	572970000	13
H7BZK6;P62068;O75317	Ubiquitin carboxyl-terminal hydrolase 46;Ubiquitin carboxyl-terminal hydrolase 12	USP46;USP12	89403000	76222000	66472000	68905000	0	71362000	81092000	67081000	56083000	57468000	102410000	86959000	77508000	8	8	8	30.7	30.7	30.7	39.499	0	22.58	963620000	41
H7BZW6;X6RAL5;O00422	Histone deacetylase complex subunit SAP18	SAP18	0	0	0	0	0	0	0	0	37157000	0	0	0	0	3	3	3	20.3	20.3	20.3	16.036	0	7.7267	270210000	15
H7C0C7;Q9UKZ1	CCR4-NOT transcription complex subunit 11	CNOT11	0	0	0	0	0	0	0	0	0	0	0	12567000	0	2	2	2	22.8	22.8	22.8	14.248	0.0012225	3.2188	55426000	3
H7C0E5;O75312;H7BZM7	Zinc finger protein ZPR1	ZPR1	56941000	48010000	0	69584000	0	0	0	0	0	0	0	0	0	4	4	4	13.2	13.2	13.2	42.542	0.00027949	5.6704	281910000	12
H7C0V0;Q8WWC4	Uncharacterized protein C2orf47, mitochondrial	C2orf47	0	0	0	0	0	0	0	0	0	0	73608000	62495000	0	3	3	3	16.4	16.4	16.4	25.006	0.00099626	3.4561	504350000	12
H7C144		ACTN4	0	0	0	0	0	0	0	0	0	0	0	0	52895000	22	2	2	76.3	8.2	8.2	39.001	0	21.936	648700000	12
H7C1U8;Q9BUR5;A0A0J9YWW6	Apolipoprotein O	APOO	892990016	908140032	777169984	731400000	738979968	754209984	807409984	776979968	867740032	710030016	792030016	935260032	848400000	9	9	9	80.9	80.9	80.9	20.08	0	251.28	10928000000	98
H7C2K6		EPB41L1	0	0	0	0	0	0	0	0	0	0	62801000	77539000	0	18	2	1	63.8	10.8	4.1	29.051	0.0012264	3.2592	366310000	7
H7C3J7;H7C2X8;Q9UBL0	cAMP-regulated phosphoprotein 21	ARPP21	0	0	0	0	0	0	0	0	0	0	0	5151000	0	1	1	1	7.1	7.1	7.1	24.01	0.001216	3.1436	17800000	4
H7C386;Q9BW91;D6RAW2	ADP-ribose pyrophosphatase, mitochondrial	NUDT9	0	21607000	0	0	0	0	0	0	0	0	0	0	0	3	3	3	11.3	11.3	11.3	31.539	0.0052048	2.3208	45923000	4
H7C3U4;O75592	E3 ubiquitin-protein ligase MYCBP2	MYCBP2	0	0	0	0	0	0	0	0	11099000	0	0	0	0	1	1	1	1.2	1.2	1.2	117.79	0.0077434	2.1032	45943000	5
H7C4E7;Q9Y534	Cold shock domain-containing protein C2	CSDC2	0	0	0	9286100	0	0	0	0	0	0	0	0	0	1	1	1	7.3	7.3	7.3	16.863	0.0079383	2.0687	22456000	4
H7C4T6		CADPS	0	0	125180000	0	0	0	0	0	0	0	0	0	0	10	1	1	40.2	6.4	6.4	35.801	0.001221	3.2027	990390000	9
H7C4U7;H7C535;Q96QZ7;A0A087WXD2;H7C5T8;A0A087WT53	Membrane-associated guanylate kinase, WW and PDZ domain-containing protein 1	MAGI1	0	0	0	0	0	0	0	0	0	0	0	0	92071000	5	5	5	7.2	7.2	7.2	123.11	0	19.761	198330000	9
H7C5A7;O14734;E9PJN0	Acyl-coenzyme A thioesterase 8	ACOT8	0	47190000	0	0	0	0	0	0	0	0	0	0	0	3	3	3	19.6	19.6	19.6	23.333	0.0016726	2.9006	231990000	10
H7C5J3;Q92995	Ubiquitin carboxyl-terminal hydrolase 13	USP13	0	0	0	0	0	0	0	0	268790016	0	0	0	0	3	1	1	10	6.4	6.4	34.228	0.009987	1.9247	647430000	2
H7C5U0		DNM1	202880000	190060000	0	0	149710000	209040000	162270000	87574000	0	0	0	0	0	5	1	1	40.5	10.7	10.7	14.875	0	8.5877	1690400000	27
H9KV31;O15394	Neural cell adhesion molecule 2	NCAM2	701369984	830929984	913400000	930609984	764780032	794940032	1054800000	662910016	576480000	781249984	653820032	364230016	754019968	20	20	20	32	32	32	91.122	0	93.033	10072000000	137
H9KV75		ACTN1	0	0	0	0	30776000	0	0	0	0	0	0	0	0	50	1	1	73.2	2.1	2.1	94.825	0	8.6921	130540000	5
H9KV90;Q9Y566	SH3 and multiple ankyrin repeat domains protein 1	SHANK1	0	0	0	0	0	0	16424000	0	0	0	0	0	0	2	2	2	2.1	2.1	2.1	225.9	0.00052938	4.4911	81964000	3
I3L0A0;Q13404;G3V2F7;A0A0A0MSL3	Ubiquitin-conjugating enzyme E2 variant 1	TMEM189-UBE2V1;UBE2V1	0	0	347350016	0	0	0	337169984	0	0	0	0	0	0	8	3	3	19.7	10	10	42.208	0.00028944	6.6677	2024600000	15
I3L0N3;P46459	Vesicle-fusing ATPase	NSF	23746000896	24085999616	18658000896	20665999360	19378999296	19971999744	22474000384	12826999808	12981999616	20701999104	17458999296	17732999168	18104000512	55	55	54	66.6	66.6	66.6	82.091	0	323.31	272690000000	965
I3L0Q0;I3L2Q4;P62253	Ubiquitin-conjugating enzyme E2 G1;Ubiquitin-conjugating enzyme E2 G1, N-terminally processed	UBE2G1	0	0	0	0	0	0	0	0	13144000	0	0	0	0	2	2	2	57.1	57.1	57.1	5.5393	0.0014447	3.0034	71946000	7
I3L170	Microtubule-associated protein	MAPT	0	935260032	739630016	1214200064	0	973790016	0	0	0	740070016	725720000	1880000000	2120999936	13	1	1	44.6	3.5	3.5	35.671	0	22.515	12286000000	17
I3L1Q3;Q8TE02;I3L2A9;I3L2T0;I3L3N8;I3L437	Elongator complex protein 5	ELP5	0	13713000	0	0	0	0	0	0	0	0	0	0	0	3	3	3	15.3	15.3	15.3	28.697	0.0012115	3.0763	77220000	4
I3L213		PHKB	0	0	0	0	0	0	0	0	0	0	0	50247000	0	5	1	1	36.2	8.1	8.1	23.538	0	10.909	600510000	11
J3QS48;I3L295;J3KT75;J3QW43;J3QRD5;O75352;J3KSI4;I3L1D2;I3L4E0;J3KTK8;J3QQZ4	Mannose-P-dolichol utilization defect 1 protein	MPDU1	0	0	0	0	0	0	0	61953000	0	0	0	0	0	3	3	3	33.7	33.7	33.7	10.978	0.00538	2.2349	58680000	6
I3L2B0;K7EIG1;O75153	Clustered mitochondria protein homolog	CLUH	0	0	0	0	0	0	0	0	0	0	0	44466000	0	6	6	6	5.6	5.6	5.6	138.23	0.00027255	5.2239	221990000	13
I3L448;A8MRA7;Q5TC12;H0YEW4	ATP synthase mitochondrial F1 complex assembly factor 1	ATPAF1	192880000	175630000	185550000	155920000	147420000	193050000	186010000	133460000	0	137880000	0	0	150010000	11	11	10	43.9	43.9	43.9	38.861	0	27.667	1865500000	47
I3L4G8;I3L4A1;Q96FZ7	Charged multivesicular body protein 6	CHMP6	0	0	168530000	0	134700000	162340000	180310000	0	0	0	0	0	0	3	3	3	25.4	25.4	25.4	20.167	0	31.941	1137100000	19
I6L894;D6RHE1		ANK2	0	0	0	0	944729984	693649984	0	0	708659968	0	688790016	0	0	103	1	0	34.3	0.7	0	430.25	0	28.047	13142000000	35
J3KMX1;Q99567	Nuclear pore complex protein Nup88	NUP88	0	36221000	0	0	0	0	0	0	0	0	0	0	0	2	2	2	4.2	4.2	4.2	78.77	0.00027473	5.3382	83044000	8
J3KMX5;P62277	40S ribosomal protein S13	RPS13	0	0	0	0	0	0	0	0	0	0	0	0	33471000	1	1	1	10.1	10.1	10.1	16.733	0.00053476	4.7355	334510000	11
Q5TIG5;J3KN01;P55196;A8MQ02	Afadin	MLLT4	88336000	82393000	0	111950000	0	0	0	0	89127000	0	76912000	108520000	0	12	12	12	10.6	10.6	10.6	189.15	0	42.028	743390000	36
J3KN16;Q5VYK3;R4GMY1	Proteasome-associated protein ECM29 homolog	KIAA0368;ECM29	136740000	95076000	88203000	90030000	135270000	81980000	109210000	132450000	100840000	80923000	137310000	96058000	90335000	16	16	16	11.6	11.6	11.6	223.69	0	84.25	1455400000	67
J3KN67		TPM3	0	0	57864000	95987000	0	71413000	0	0	72589000	0	0	0	0	19	2	0	50.9	7.7	0	33.222	0.00029095	6.7876	1498400000	15
J3KNC2;Q147X3	N-alpha-acetyltransferase 30	NAA30	0	0	0	0	13500000	0	0	0	0	0	0	0	0	1	1	1	10.9	10.9	10.9	18.884	0.00053022	4.5361	42628000	3
J3KNF4;O14618;E9PP76	Copper chaperone for superoxide dismutase;Superoxide dismutase [Cu-Zn]	CCS	136810000	108880000	124510000	0	97121000	0	0	120020000	0	0	0	0	0	5	5	5	25.5	25.5	25.5	27.086	0	12.625	1351600000	22
J3KNF8;H3BUX2;O43169;D6RFH4	Cytochrome b5 type B	CYB5B	795630016	597020032	686940032	716350016	574230016	723089984	787209984	498030016	701459968	804499968	489950016	515920000	517470016	5	5	5	59.3	59.3	59.3	16.694	0	176.87	8713000000	84
J3KNP4;Q9NPR2;H0YN49;H0YMZ3	Semaphorin-4B	SEMA4B	0	0	0	0	0	0	0	0	106810000	0	0	0	0	3	3	3	6.9	6.9	6.9	92.765	0	9.1514	522870000	14
J3KNQ4;Q9NVD7	Alpha-parvin	PARVA	265630000	209430000	249970000	290390016	353289984	258490000	331150016	329940000	354849984	231590000	303809984	290100000	291180000	7	7	7	18.9	18.9	18.9	46.589	0	41.803	3900400000	71
J3KNV4		ITGA7	363560000	187080000	403489984	260100000	209220000	211300000	221020000	129210000	236230000	277920000	208340000	168030000	246310000	12	12	1	14.6	14.6	1.7	123.63	0	45.304	3196700000	63
J3QL05;J3KP15;Q01130;Q9BRL6	Serine/arginine-rich splicing factor 2;Serine/arginine-rich splicing factor 8	SRSF2;SRSF8	0	619030016	0	505990016	772120000	688480000	494369984	550220032	625190016	450280000	736889984	680689984	595070016	4	4	4	36.9	36.9	36.9	15.156	0	65.512	7444400000	50
J3KPF0;F8VWT9;Q9Y4D8	Probable E3 ubiquitin-protein ligase HECTD4	HECTD4	0	0	0	0	0	0	0	84518000	0	0	81928000	93883000	0	9	9	9	2.7	2.7	2.7	484.35	0	55.726	759000000	21
J3KPJ3;Q8N5S9	Calcium/calmodulin-dependent protein kinase kinase 1	CAMKK1	0	0	0	0	0	0	0	0	0	0	0	0	13429000	1	1	1	2.4	2.4	2.4	58.858	0	11.841	174860000	12
J3KPP4;O95232;D6RDI2	Luc7-like protein 3	LUC7L3	30254000	49218000	0	0	0	24507000	0	33333000	0	0	63485000	105890000	44515000	4	4	4	11.2	11.2	11.2	58.22	0	32.044	430280000	28
J3KPT0;Q6V1X1	Dipeptidyl peptidase 8	DPP8	0	0	0	0	0	40284000	0	0	0	0	0	0	0	2	2	2	2.9	2.9	2.9	83.904	0.00098839	3.364	103910000	4
J3KSW2;J3KQ09;X6R2I3;Q9UNA4	DNA polymerase iota	POLI	0	0	0	0	0	0	0	0	0	0	0	0	129800000	1	1	1	3.3	3.3	3.3	71.806	0.0045496	2.3596	595220000	14
J3KQ12;E9PIU3;H7BXM1;E9PJK0;E9PSB5;Q96G97	Seipin	BSCL2	100790000	0	177790000	126050000	0	0	0	103500000	0	0	0	79704000	0	4	4	4	15.1	15.1	15.1	51.286	0	38.122	921440000	24
J3KQ19;Q8N2Q7	Neuroligin-1	NLGN1	0	0	0	0	0	0	0	0	0	0	14748000	0	0	4	1	1	9.2	2.1	2.1	68.328	0.0034451	2.447	205390000	9
J3KQ32;Q9NTK5	Obg-like ATPase 1	OLA1	2740600064	3089600000	2723300096	2524199936	2419000064	2688800000	2662500096	2733100032	2061200000	2553499904	2765199872	2426500096	2174500096	24	24	24	70	70	70	46.937	0	323.31	35305000000	243
J3KQ41;Q9H9Q2;J3KQ34;J3QT95;A0A087X1P5	COP9 signalosome complex subunit 7b	COPS7B	52161000	47182000	46623000	64738000	67914000	0	113680000	80316000	58981000	0	105190000	57885000	60726000	4	4	4	21.6	21.6	21.6	31.521	0	43.441	856910000	31
J3KQ48;Q9Y3E5	Peptidyl-tRNA hydrolase 2, mitochondrial	PTRH2	0	56932000	0	0	0	0	0	0	0	0	0	0	0	2	2	2	16.1	16.1	16.1	19.325	0.00099577	3.4523	184790000	8
J3KQJ1;Q8NBJ7;C9JL30;A8MXB9;C9J660;F8WA42;E9PBT8;H7C3B2	Sulfatase-modifying factor 2	SUMF2	68008000	58867000	0	0	74127000	65824000	0	0	0	0	0	0	0	4	4	4	11.9	11.9	11.9	35.922	0	9.1304	458630000	16
J3KQR7;Q9Y4F5	Centrosomal protein of 170 kDa protein B	CEP170B	39096000	0	0	0	0	0	0	0	0	0	0	0	0	2	2	2	1.9	1.9	1.9	171.76	0.0012101	3.0596	64055000	2
J3KQS6;Q9NWV8;M0QXG9;M0R3F4;M0R2A4;M0R2K3;M0R193;M0R0I0;M0R2I2	BRISC and BRCA1-A complex member 1	BABAM1	0	0	0	0	20643000	0	0	0	0	0	0	0	0	4	4	4	25.2	25.2	25.2	28.164	0	17.419	59205000	7
J3KR44;Q96FW1;F5H6Q1;F5GYN4;F5GYJ8;F5H3F0	Ubiquitin thioesterase OTUB1	OTUB1	4629499904	4479600128	4264199936	3963000064	4668400128	4877400064	4360500224	3880499968	3399500032	4087200000	3931099904	3890800128	4439600128	16	16	16	71.7	71.7	71.7	31.44	0	323.31	56820000000	334
J3KR97;Q9BTW9	Tubulin-specific chaperone D	TBCD	844609984	941470016	833560000	743150016	1004400000	764860032	942120000	774889984	860089984	889110016	733080000	878360000	757360000	36	36	36	46.6	46.6	46.6	136.55	0	282.39	11453000000	251
J3KRT0;J3KS23;Q13951;H3BSC0	Core-binding factor subunit beta	CBFB	0	0	0	0	0	60734000	0	0	0	0	0	0	0	2	2	2	37.7	37.7	37.7	7.3251	0	17.754	305160000	6
J3KTF4;J3QRZ2;J3QLB7;J3QKS6;J3QRG5;J3KSJ5;Q9BQA9	Uncharacterized protein C17orf62	C17orf62	0	0	0	0	0	0	0	0	0	51019000	0	0	0	1	1	1	15.9	15.9	15.9	9.8064	0.0021122	2.7053	89804000	3
J3KSL8;J3QQJ5;Q9Y2L5;J3QR00;J3QSA1	Trafficking protein particle complex subunit 8	TRAPPC8	0	0	0	0	0	31154000	0	0	0	0	0	0	0	2	2	2	4.4	4.4	4.4	104.24	0.0045393	2.3412	40121000	1
J3QL54;J3KT10;Q9BW27;J3QS63;J3KTC7;J3QL91;J3QLV0;F5H0W7;J3QLD4;J3QLH0	Nuclear pore complex protein Nup85	NUP85	24355000	0	11246000	18797000	0	0	0	29559000	42745000	0	60248000	0	27666000	2	2	2	5.1	5.1	5.1	62.101	0	35.324	299700000	19
J3KT73;J3QL01;P63173;J3KSP2	60S ribosomal protein L38	RPL38	35754000	55027000	0	0	46486000	0	62684000	78215000	0	0	0	67205000	0	3	3	3	39.1	39.1	39.1	7.5649	0.00027144	5.1353	577290000	24
J3KTA1;Q96IG2	F-box/LRR-repeat protein 20	FBXL20	0	0	0	0	0	42132000	0	0	0	0	0	0	0	4	4	4	10.3	10.3	10.3	48.575	0.0036664	2.4207	70829000	12
J3KTA4;P17844	Probable ATP-dependent RNA helicase DDX5	DDX5	715200000	548950016	804160000	801420032	603390016	607859968	475660000	542560000	598550016	551750016	515280000	747489984	525340000	24	15	15	45.8	31.8	31.8	69.086	0	171.46	8459000000	178
J3KTA9;J3QQN7;Q8N9F7	Glycerophosphodiester phosphodiesterase domain-containing protein 1	GDPD1	0	0	0	0	0	0	0	30115000	0	0	0	0	0	2	2	2	23.8	23.8	23.8	14.54	0.0085545	2.0258	185320000	1
J3KTC1		MSI2	0	0	0	0	0	0	0	0	0	0	0	0	4674200	6	1	1	60	12.1	12.1	15.46	0.00051401	3.9247	39679000	8
J3KTF8;J3QQX2;P52565;J3KRE2;J3KRY1	Rho GDP-dissociation inhibitor 1	ARHGDIA	8779200512	9789599744	8956600320	8744399872	8833800192	8708899840	7047499776	8562800128	8999799808	10954999808	8208799744	7454199808	8361999872	9	9	9	61.7	61.7	61.7	21.517	0	323.31	118880000000	285
J3KTL2;Q07955	Serine/arginine-rich splicing factor 1	SRSF1	1210200064	1620400000	1238899968	1560600064	1432800000	1850800000	1340499968	1357299968	1389400064	1181100032	1226000000	1368300032	1302599936	12	12	12	43.5	43.5	43.5	28.329	0	39.981	18926000000	159
J3QK89;Q8IWX8	Calcium homeostasis endoplasmic reticulum protein	CHERP	81608000	0	55667000	51344000	0	73266000	0	52907000	0	0	0	47921000	0	3	3	3	3.9	3.9	3.9	104.93	0.00026961	4.9524	501410000	14
J3QL56;O75880	Protein SCO1 homolog, mitochondrial	SCO1	0	0	0	0	0	30711000	0	0	0	0	0	0	0	3	3	3	11.9	11.9	11.9	30.178	0.008348	2.0434	256940000	6
J3QL71;Q96FV2;J3QRJ1	Secernin-2	SCRN2	347729984	341169984	379920000	255760000	390260000	394750016	298680000	445780000	312889984	340390016	399950016	0	329540000	10	10	10	32.6	32.6	32.6	47.493	0	196.9	4377200000	69
J3QLE5;P63162;P14678;J3KRY3;S4R3P3	Small nuclear ribonucleoprotein-associated protein N;Small nuclear ribonucleoprotein-associated proteins B and B	SNRPN;SNRPB	336409984	366769984	345240000	360760000	274840000	254490000	246340000	0	269860000	193480000	273409984	267590000	210500000	6	6	6	31.4	31.4	31.4	17.546	0.00026838	4.851	3747900000	43
J3QLI9;P62314	Small nuclear ribonucleoprotein Sm D1	SNRPD1	99573000	123540000	189680000	0	0	0	129770000	94726000	101710000	0	131900000	113960000	77109000	2	2	2	44	44	44	8.3926	0.0002936	6.9793	1227000000	22
J3QLR8;Q9Y3D9	28S ribosomal protein S23, mitochondrial	MRPS23	0	0	48118000	0	0	0	0	45779000	39417000	0	55124000	0	0	5	5	5	36.8	36.8	36.8	17.517	0.00053433	4.7212	368320000	22
J3QR07;Q96MU7	YTH domain-containing protein 1	YTHDC1	0	0	0	0	0	0	0	0	0	0	0	0	16052000	1	1	1	1.6	1.6	1.6	85.586	0.0045568	2.3706	120370000	9
K7EIG7;J3QRN6;O94832;J3KRL0	Unconventional myosin-Id	MYO1D	0	21317000	0	0	0	0	0	0	0	25372000	0	0	0	4	4	4	4.9	4.9	4.9	106.01	0	9.077	241030000	25
J3QRS3;P19105;O14950	Myosin regulatory light chain 12A;Myosin regulatory light chain 12B	MYL12A;MYL12B	1966499968	1828800000	2086200064	1892899968	1906300032	1790899968	1874099968	1207000064	1655699968	1238800000	1683800064	1428999936	1629100032	9	9	4	49.7	49.7	17.5	20.457	0	132.09	23704000000	156
J3QRS9;X6R4W8;O43670;J3KS31	BUB3-interacting and GLEBS motif-containing protein ZNF207	ZNF207	0	0	0	369820000	0	0	0	0	0	0	140130000	0	251900000	4	4	4	9.3	9.3	9.3	52.541	0	19.671	1253500000	19
J3QRU1;P07947	Non-specific protein-tyrosine kinase;Tyrosine-protein kinase Yes	YES1	619510016	677139968	427190016	719310016	627560000	745020032	695340032	661340032	585840000	558259968	701299968	761600000	628780032	17	17	9	42	42	29.7	61.386	0	75.554	8559700000	104
J3QSB4;P26373	60S ribosomal protein L13	RPL13	0	0	0	45311000	0	0	0	0	0	0	0	0	0	2	2	2	15.1	15.1	15.1	14.692	0.001675	2.9142	92041000	4
J3QT28;O43684;J3QSX4	Mitotic checkpoint protein BUB3	BUB3	348500000	368430016	382780000	390070016	349950016	381849984	297100000	362000000	322020000	371180000	395340000	394660000	272280000	11	11	11	50.7	50.7	50.7	31.703	0	39.287	4752800000	89
J3QTA6;Q9BRQ6;H0Y922;J3QTB2	MICOS complex subunit MIC25	CHCHD6	588750016	505400000	390800000	440769984	462640000	272660000	345280000	341240000	384230016	325649984	399500000	405630016	399160000	9	9	9	40.6	40.6	40.6	28.817	0	65.961	5497400000	70
J9JIC5;Q9HAS0	Protein Njmu-R1	C17orf75	26199000	26754000	0	0	0	0	0	35281000	42123000	0	0	0	0	3	3	3	9.3	9.3	9.3	44.609	0.00028297	5.9417	254970000	17
K4DI93;Q13620	Cullin-4B	CUL4B	382220000	339369984	272060000	268980000	279480000	245480000	323270016	354480000	384140000	485220000	290480000	358009984	288910016	25	25	15	31.9	31.9	21.3	102.75	0	108.48	4368300000	140
K7EM02;K7EIJ8;Q8IYT4;K7EQ00;K7EPQ6	Katanin p60 ATPase-containing subunit A-like 2	KATNAL2	0	0	0	0	0	822700032	0	0	0	0	0	0	0	2	2	2	20.3	20.3	20.3	13.999	0.00098474	3.3151	8066900000	28
K7EIU8;Q13485;A0A087WUF3	Mothers against decapentaplegic homolog;Mothers against decapentaplegic homolog 4	SMAD4	51879000	0	0	0	0	0	0	0	0	0	0	0	0	2	2	2	7	7	7	50.052	0.00051867	4.0846	285890000	10
K7EJH8		ACTN4	179000000	0	239550000	264680000	273489984	324329984	362169984	329880000	311110016	192220000	313140000	241580000	306270016	14	2	2	75.3	18.7	18.7	21.43	0	26.086	4260800000	49
K7EJT5;K7EP65;K7EKS7;K7ELC4;K7EMH1;K7ERI7;P35268	60S ribosomal protein L22	RPL22	0	0	0	0	0	0	0	0	0	132830000	176040000	175690000	0	2	2	2	51.1	51.1	51.1	5.0827	0.0021023	2.6463	687950000	8
K7EK00;Q96ND0;K7ERQ2	Protein FAM210A	FAM210A	0	0	0	0	0	0	0	0	0	0	47520000	0	0	2	2	2	10.8	10.8	10.8	30.292	0.0020974	2.6337	89064000	4
K7EK07;P84243;K7EMV3;K7EP01;B4DEB1;K7ES00;Q71DI3;Q16695;P68431	Histone H3;Histone H3.3;Histone H3.2;Histone H3.1t;Histone H3.1	H3F3B;H3F3A;HIST2H3A;HIST3H3;HIST1H3A	765680000	648830016	988710016	544640000	2144000000	0	5151099904	1712600064	6262400000	424640000	2776000000	1061400000	3773900032	3	3	1	34.8	34.8	24.2	14.914	0	78.123	29302000000	52
K7ENB6;K7EK24;Q9NS82	Asc-type amino acid transporter 1	SLC7A10	0	0	0	0	0	0	0	0	0	0	0	22123000	0	1	1	1	25.4	25.4	25.4	7.011	0.00074925	3.5015	81360000	5
K7EQ55;K7EK33;Q96EP5;K7EQ02	DAZ-associated protein 1	DAZAP1	0	212980000	194370000	236500000	184610000	0	0	0	152710000	0	161300000	193400000	143910000	5	5	5	18	18	18	43.312	0	41.848	2104500000	29
K7EK35;P42229	Signal transducer and activator of transcription;Signal transducer and activator of transcription 5A	STAT5A	0	0	0	0	0	0	0	15754000	0	0	0	0	0	11	1	1	16	2.1	2.1	87.361	0.0055928	2.2047	14922000	1
K7EK60;K7EJE6		FMNL1	0	0	0	80265000	0	0	0	0	0	0	0	0	0	3	3	1	5.9	5.9	1.8	74.601	0.00052124	4.188	382990000	14
K7EKD1		GFAP	6279199744	6344699904	9421299712	9404000256	3125199872	11326999552	8117400064	1801699968	3706700032	6732100096	4388800000	2905999872	4958400000	7	3	3	71.9	49.1	49.1	6.5992	0	217.05	137460000000	175
K7EKD8		CAPNS1	0	0	0	0	0	0	0	0	0	0	0	0	0	11	1	1	76.9	15.1	15.1	24.802	0	7.2259	0	1
K7EKE6;P36776;K7EJE8	Lon protease homolog, mitochondrial	LONP1	2288399872	1652300032	2327899904	1712400000	1585500032	2154299904	1854499968	1903100032	2047000064	2087600000	2230899968	2219399936	2129200000	41	41	41	66.9	66.9	66.9	95.179	0	323.31	27700000000	347
K7EKE8;Q92692	Nectin-2	PVRL2	0	0	0	0	0	0	0	0	0	54992000	0	0	0	2	2	2	12.9	12.9	12.9	22.642	0.0016718	2.8978	133310000	4
K7EKI4;K7ELF1;K7ELQ0;K7ES61;X6RAY8;Q9BYD3	39S ribosomal protein L4, mitochondrial	MRPL4	0	0	0	0	0	0	0	0	0	0	0	27968000	0	1	1	1	12.6	12.6	12.6	14.056	0.0023207	2.5883	96506000	3
K7EL81;Q9BZL4	Protein phosphatase 1 regulatory subunit 12C	PPP1R12C	0	56785000	0	0	0	67528000	44069000	51793000	0	0	0	0	68499000	8	8	8	16	16	16	80.199	0	14.623	462210000	28
K7ELG9;Q3MHD2	Protein LSM12 homolog	LSM12	0	0	0	0	0	0	0	0	31698000	0	0	0	0	2	2	2	16.1	16.1	16.1	24.955	0.00029044	6.7578	496060000	11
K7ELL7;P14314	Glucosidase 2 subunit beta	PRKCSH	1549900032	1262400000	1188800000	1228199936	1287000064	1483900032	1252600064	756400000	944460032	1315900032	966200000	1032300032	1037800000	15	15	15	29.3	29.3	29.3	60.192	0	136.27	15740000000	122
K7ELQ9;Q6UW68;K7EM09;K7EPR0	Transmembrane protein 205	TMEM205	0	0	129110000	162950000	0	0	119210000	0	0	0	0	0	0	3	3	3	22.9	22.9	22.9	19.27	0	10.108	1073400000	12
K7ELV2;Q96EE3;K7EP88;K7ENI5	Nucleoporin SEH1	SEH1L	134210000	116830000	99037000	116830000	126450000	104790000	113860000	122130000	110500000	0	118150000	93921000	106350000	8	8	8	43.7	43.7	43.7	29.541	0	19.049	1505500000	41
K7EM18;P41567	Eukaryotic translation initiation factor 1	EIF1	274320000	258440000	185570000	166250000	268830016	213960000	220810000	0	259440000	0	0	0	0	7	7	3	74.4	74.4	28.9	13.607	0	198.55	2017800000	35
K7ES98;K7EM85;Q92619;F5H1R4;K7ES92	Minor histocompatibility protein HA-1;Minor histocompatibility antigen HA-1	HMHA1	0	0	0	0	0	0	0	0	0	0	35038000	0	0	5	5	5	7.6	7.6	7.6	125.05	0	59.095	188950000	5
K7EMM8;Q49A26	Putative oxidoreductase GLYR1	GLYR1	0	0	0	0	0	43382000	0	0	0	0	0	0	0	5	5	5	14.9	14.9	14.9	57.215	0	18.652	372110000	16
K7EMP8;P14136	Glial fibrillary acidic protein	GFAP	1163500060672	1285899943936	1414000017408	1616499965952	1288400011264	1807899951104	1415299989504	1581699956736	1565299965952	2455299948544	1221100044288	1418900013056	1493600043008	66	66	0	87.7	87.7	0	49.88	0	323.31	21706000000000	11449
K7EMQ3		DNM2	0	0	0	0	0	0	0	0	0	0	19330000	0	0	13	1	1	40.5	4.8	4.8	33.68	0.0021062	2.6705	345030000	10
K7ENG2;P26368	Splicing factor U2AF 65 kDa subunit	U2AF2	637630016	670550016	686720000	637990016	583580032	744680000	585649984	318800000	484369984	740409984	560710016	463470016	451420000	11	11	11	48.9	48.9	48.9	33.901	0	118.78	7585900000	99
K7ENI6;K7ERE1;Q8N2U0	Transmembrane protein 256	TMEM256	0	0	0	0	0	0	0	0	0	0	0	0	77790000	1	1	1	68.3	68.3	68.3	3.9694	0	42.85	821710000	8
K7ENP1;Q7Z4G4;Q5JY02	tRNA (guanine(10)-N2)-methyltransferase homolog	TRMT11	0	0	61701000	0	0	0	0	0	0	0	0	0	0	3	3	3	13.9	13.9	13.9	26.453	0.0025504	2.5691	174470000	5
K7EP59;Q15831	Serine/threonine-protein kinase STK11	STK11	0	0	0	0	0	0	16086000	0	0	0	0	0	0	1	1	1	3.2	3.2	3.2	48.455	0.002772	2.5226	36494000	2
K7EPI4		GFAP	0	0	0	0	589710016	595640000	0	2245799936	1769200000	0	940070016	992339968	1273500032	14	2	2	56.5	16.9	16.9	14.037	0	9.8851	11593000000	95
K7EQ93;Q9C0B0	RING finger protein unkempt homolog	UNK	0	0	162370000	0	0	0	0	0	0	0	0	0	0	1	1	1	13.2	13.2	13.2	23.629	0	29.962	182450000	1
K7EQA1;O14737	Programmed cell death protein 5	PDCD5	136680000	0	0	0	0	143300000	125170000	0	115410000	0	0	0	100080000	5	5	5	54	54	54	10.004	0	10.846	1037700000	32
K7EQG4;O00168	Phospholemman	FXYD1	0	0	0	0	0	0	0	0	0	0	0	0	150040000	1	1	1	10.4	10.4	10.4	12.784	0.009584	1.9545	561960000	2
K7EQL6;Q8NFA0	Ubiquitin carboxyl-terminal hydrolase;Ubiquitin carboxyl-terminal hydrolase 32	USP32	30294000	0	0	0	0	0	0	0	0	0	22706000	0	0	3	3	3	2.7	2.7	2.7	143.94	0.00052784	4.4369	79981000	12
K7EQQ1;O96005	Cleft lip and palate transmembrane protein 1	CLPTM1	0	0	0	0	0	43928000	0	0	0	0	0	0	0	1	1	1	8.8	8.8	8.8	18.743	0.0012151	3.1385	60664000	2
K7ERC8;Q06136;K7EQS7	3-ketodihydrosphingosine reductase	KDSR	132390000	0	0	139560000	0	133220000	0	109430000	124310000	0	0	0	0	5	5	5	22.1	22.1	22.1	32.726	0	16.541	893950000	23
K7ERD8;K7EL66;M0QX52		MAPRE2	0	0	0	0	0	0	0	0	0	0	56144000	0	0	13	1	1	74.7	8.2	8.2	21.594	0.00027086	5.0812	218780000	4
K7ERH7		DTNA	0	0	0	39249000	0	0	0	0	0	0	0	0	0	8	1	1	85.3	18.3	18.3	12.413	0	8.848	38678000	2
K7ES72		CAPS	0	0	0	0	0	0	0	0	0	0	0	0	244920000	9	1	1	69.4	7.5	7.5	14.593	0.0095777	1.9522	1570200000	15
K7ESN3;Q8N2G8	GH3 domain-containing protein	GHDC	0	0	45958000	0	0	0	0	0	0	0	0	0	0	3	3	3	6.5	6.5	6.5	51.814	0.0085489	2.0199	94450000	11
K7ESP4;Q8WVC6	Dephospho-CoA kinase domain-containing protein	DCAKD	84462000	0	68912000	87001000	52706000	0	50586000	79312000	145540000	0	64849000	199610000	50403000	6	6	6	34	34	34	24.177	0	9.4568	1048400000	35
K7ESP7		SLC44A2	0	0	0	0	0	0	0	0	0	0	0	0	22295000	3	1	1	23	10.8	10.8	16.737	0.0051755	2.2758	178920000	5
K7N7A8;P29972	Aquaporin-1	AQP1	1474400000	1164300032	1899699968	1701900032	1208700032	1298200064	1263299968	3072399872	2841100032	1821600000	1740899968	1723500032	1673400064	3	3	3	15.1	15.1	15.1	48.685	0	323.31	24256000000	100
M0QWZ7;Q9NP81;M0R2C6;M0R259	Serine--tRNA ligase, mitochondrial	SARS2	263240000	164590000	175660000	152700000	117890000	187250000	193340000	191670000	231160000	155480000	224990000	137760000	140470000	11	11	11	30.3	30.3	30.3	58.182	0	21.651	2419100000	60
M0QXB4;O14579	Coatomer subunit epsilon	COPE	379720000	352310016	367860000	410329984	312880000	489449984	332190016	285230016	282620000	307280000	340620000	311860000	383049984	10	10	10	54.1	54.1	54.1	36.923	0	88.037	4782000000	78
M0QXH0;Q99757	Thioredoxin, mitochondrial	TXN2	198820000	162560000	215860000	0	178590000	0	163100000	140930000	185940000	0	199960000	138460000	160120000	3	3	3	25	25	25	7.0271	0	21.992	2155500000	25
M0QXN1;M0R122;M0QZ66;P54852	Epithelial membrane protein 3	EMP3	0	0	0	0	0	115920000	0	0	0	0	60838000	81967000	0	2	2	2	13	13	13	17.428	0.0099826	1.9236	612240000	15
M0QXN5;P37198	Nuclear pore glycoprotein p62	NUP62	0	0	0	175870000	0	145310000	0	0	0	0	0	0	0	7	7	7	22.2	22.2	22.2	45.615	0	39.749	1129200000	23
M0QYN0;Q969H8;M0QXF7	Myeloid-derived growth factor	MYDGF	184100000	139800000	0	192500000	0	174610000	0	0	0	0	0	0	0	2	2	2	13.8	13.8	13.8	20.387	0.00027886	5.6489	1520300000	17
M0R0N4;M0QYZ2;P53680;X6R390;M0QZ21	AP-2 complex subunit sigma	AP2S1	412910016	298750016	226090000	0	233510000	298169984	247950000	366820000	309569984	352049984	259950000	386860000	249960000	6	6	4	42.4	42.4	25.7	17.303	0	12.681	3710300000	49
M0QZJ5;Q9BV35;M0QZT4;M0R1W8	Calcium-binding mitochondrial carrier protein SCaMC-3	SLC25A23	0	0	0	0	0	0	0	0	0	0	0	0	18870000	4	2	2	16.1	9.3	9.3	25.683	0.0051744	2.2718	123770000	10
M0QZR4;Q92888;M0R2C7;M0QYC1	Rho guanine nucleotide exchange factor 1	ARHGEF1	0	0	0	32233000	0	0	0	0	0	0	0	0	0	2	2	2	2.4	2.4	2.4	108.32	0.0014482	3.0274	46717000	5
M0R0F0;M0R0R2;P46782;M0QZN2	40S ribosomal protein S5;40S ribosomal protein S5, N-terminally processed	RPS5	238950000	263310000	237340000	337950016	225400000	399700000	334089984	339100000	545590016	291840000	218520000	284510016	326900000	8	8	8	36.5	36.5	36.5	22.391	0	69.65	4128000000	56
M0R116;P13637;A0A2R8YEY8;A0A0A0MT26	Sodium/potassium-transporting ATPase subunit alpha-3	ATP1A3	2396499968	2253799936	3879899904	2879500032	2975000064	2550000128	3351600128	2022000000	2341600000	1604300032	2470299904	1768800000	2467399936	41	25	23	51.2	31.8	29	108.28	0	323.31	35090000000	268
M0R210;P62249;M0R3H0;M0QX76;M0R1M5;Q6IPX4	40S ribosomal protein S16	RPS16	157100000	0	0	186850000	0	0	0	109960000	0	0	0	118500000	107580000	5	5	5	39.5	39.5	39.5	14.419	0.00028977	6.7386	1092600000	27
M0R268;P09012;M0R0G9;M0QXK2;M0R221;M0R2B8	U1 small nuclear ribonucleoprotein A	SNRPA	0	0	0	0	0	0	0	0	0	0	0	0	127750000	3	1	1	13.3	7.4	7.4	28.388	0.00053206	4.6034	1264100000	10
M0R2A0;Q5UCC4	ER membrane protein complex subunit 10	EMC10	0	0	0	0	0	0	0	0	0	0	0	14319000	0	1	1	1	4.6	4.6	4.6	38.975	0	29.379	60252000	6
M0R3F6;M0R2Z9;Q8IX01	SURP and G-patch domain-containing protein 2	SUGP2	59130000	0	64170000	55463000	0	92770000	56520000	0	87729000	0	74558000	55594000	73628000	9	9	9	12.7	12.7	12.7	93.859	0	10.294	741830000	40
M0R344;Q9NRA0;E9PCV4	Sphingosine kinase 2	SPHK2	0	0	0	0	0	0	30720000	0	0	0	0	0	0	3	3	3	5.9	5.9	5.9	70.082	0.00027263	5.2305	191650000	16
O00139	Kinesin-like protein KIF2A	KIF2A	1005900032	992160000	1089500032	1076199936	748510016	1061000000	1025699968	890360000	735889984	850070016	788000000	926150016	890790016	21	21	20	27.2	27.2	25.9	79.954	0	122.27	12317000000	186
O00151	PDZ and LIM domain protein 1	PDLIM1	0	0	0	0	1086599936	0	0	0	0	0	0	0	0	4	4	4	15.8	15.8	15.8	36.071	0.001902	2.8381	1184500000	8
O00154;K7EKP8	Cytosolic acyl coenzyme A thioester hydrolase	ACOT7	4286099968	4195300096	3463000064	3486599936	3301600000	3760399872	3578299904	3057100032	2542400000	3827300096	2999800064	3336000000	3291300096	15	15	15	40.3	40.3	40.3	41.796	0	134.7	47639000000	294
O00165;Q5VYD6	HCLS1-associated protein X-1	HAX1	0	0	0	25975000	0	0	25057000	0	29348000	0	32320000	30459000	0	4	4	4	18.6	18.6	18.6	31.62	0	7.1877	278250000	26
O00170;E9PMH2	AH receptor-interacting protein	AIP	422689984	430630016	431340000	437929984	373310016	533849984	471950016	401160000	342540000	410640000	404649984	381129984	440680000	11	11	11	47.3	47.3	47.3	37.636	0	33.713	5607700000	80
O00178	GTP-binding protein 1	GTPBP1	0	0	113770000	0	0	0	0	0	101810000	0	0	91173000	92380000	4	4	4	7.9	7.9	7.9	72.453	0	11.179	735080000	17
O00182;J3KSY2;Q6DKI2;Q3B8N2	Galectin-9;Galectin;Galectin-9C;Galectin-9B	LGALS9;LGALS9C;LGALS9B	88397000	97891000	213330000	147710000	123590000	83842000	0	159580000	82710000	155890000	149240000	75459000	105730000	6	6	6	21.7	21.7	21.7	39.518	0	16.242	1521900000	41
O00186	Syntaxin-binding protein 3	STXBP3	575129984	664320000	727560000	671260032	597240000	623539968	691929984	613249984	650129984	697219968	606800000	665720000	651600000	20	20	20	41.7	41.7	41.7	67.764	0	98.037	8735900000	185
O00194	Ras-related protein Rab-27B	RAB27B	0	0	0	54659000	0	0	46595000	0	0	0	0	0	0	5	5	5	27.5	27.5	27.5	24.608	0.00051151	3.8394	500740000	16
O00203	AP-3 complex subunit beta-1	AP3B1	192050000	119000000	0	124330000	169080000	83680000	0	267850000	213610000	191330000	168280000	193640000	228950000	20	13	13	20.4	14.1	14.1	121.32	0	18.313	1941400000	65
O00217;E9PPW7;E9PKH6;E9PN51;F8W9K7	NADH dehydrogenase [ubiquinone] iron-sulfur protein 8, mitochondrial	NDUFS8	1001900032	921100032	887929984	701880000	743920000	909550016	796840000	801809984	896179968	849500032	870169984	826620032	712430016	7	7	7	43.3	43.3	43.3	23.705	0	86.166	11573000000	128
O00231	26S proteasome non-ATPase regulatory subunit 11	PSMD11	1443299968	1182099968	1241799936	1160600064	1119699968	1271800064	1144999936	1136499968	1044400000	947680000	1236300032	1108199936	1247200000	23	23	23	62.3	62.3	62.3	47.463	0	56.668	16062000000	182
O00232	26S proteasome non-ATPase regulatory subunit 12	PSMD12	959400000	871350016	964080000	900310016	877009984	910620032	989070016	930720000	846870016	835440000	988049984	1080499968	958780032	21	21	21	51.8	51.8	51.8	52.904	0	129.03	12648000000	191
O00233;J3KN29;F5H5V4;F5GX23;F5H169	26S proteasome non-ATPase regulatory subunit 9	PSMD9	0	287649984	0	318670016	269390016	312929984	263170000	215160000	223730000	321460000	223400000	208040000	228230000	8	8	8	33.2	33.2	33.2	24.682	0	41.791	3213400000	39
O00264	Membrane-associated progesterone receptor component 1	PGRMC1	2414200064	2160399872	1803500032	2207500032	2194500096	1923699968	2084700032	1706099968	1884700032	2109400064	1768499968	2034400000	2060000000	13	13	12	62.1	62.1	57.4	21.671	0	323.31	26546000000	194
O00267	Transcription elongation factor SPT5	SUPT5H	0	0	0	0	17046000	0	0	0	0	0	0	0	0	3	3	3	4.8	4.8	4.8	121	0.00028329	5.9814	73959000	5
O00273	DNA fragmentation factor subunit alpha	DFFA	148610000	158280000	0	168180000	169820000	202730000	0	192790000	208800000	142560000	189880000	0	184180000	8	8	8	33.8	33.8	33.8	36.521	0	26.753	1961600000	54
O00291	Huntingtin-interacting protein 1	HIP1	0	0	0	0	109210000	152230000	0	0	0	0	0	0	0	8	7	7	10.9	9.5	9.5	116.22	0	9.7557	871130000	19
O00299	Chloride intracellular channel protein 1	CLIC1	1171600000	1140199936	1659100032	2255800064	1624800000	1404600064	1624099968	1663000064	1415200000	2221600000	1441400064	1261900032	1534200064	16	16	16	83	83	83	26.922	0	130.96	20262000000	194
O00303	Eukaryotic translation initiation factor 3 subunit F	EIF3F	438500000	389400000	518990016	504200000	419380000	479460000	481780000	473550016	440660000	0	492089984	448110016	433000000	9	9	9	39.5	39.5	39.5	37.563	0	121.8	6103500000	94
O00308	NEDD4-like E3 ubiquitin-protein ligase WWP2	WWP2	23360000	0	0	0	0	0	0	0	0	0	0	46042000	0	5	4	3	6.8	5.6	4.7	98.911	0	12.924	187640000	8
O00330	Pyruvate dehydrogenase protein X component, mitochondrial	PDHX	837640000	726129984	786659968	684990016	729779968	847750016	816649984	500800000	699200000	596339968	737820032	687790016	660430016	19	19	19	47.3	47.3	47.3	54.122	0	270.66	9632700000	117
O00399	Dynactin subunit 6	DCTN6	292000000	292220000	265390000	0	260840000	300660000	0	267070000	0	275849984	224780000	224870000	0	5	5	5	24.2	24.2	24.2	20.747	0.00028818	6.5144	2647400000	20
O00401	Neural Wiskott-Aldrich syndrome protein	WASL	225930000	199130000	0	241480000	162810000	203200000	137330000	223680000	218420000	295790016	140750000	195570000	175580000	9	9	9	32.1	32.1	32.1	54.826	0	61.331	2383800000	61
O00408;E9PEF1	cGMP-dependent 3,5-cyclic phosphodiesterase	PDE2A	1036200000	1126400000	886739968	994350016	951449984	828969984	904880000	691190016	520660000	732710016	685760000	733619968	682540032	27	26	26	41.2	41.2	41.2	105.72	0	225.48	11011000000	190
O00410;H0Y8C6	Importin-5	IPO5	4721200128	4040600064	3284999936	4345800192	4312999936	3896199936	4036499968	3809900032	3936999936	4012300032	3341100032	3744800000	4199300096	44	44	36	58.4	58.4	49	123.63	0	323.31	54513000000	613
O00429	Dynamin-1-like protein	DNM1L	7493199872	7535600128	5545500160	6376999936	6849099776	7113999872	6377399808	5688600064	6125400064	5590400000	6294600192	6495099904	6495900160	42	42	3	73.5	73.5	8.2	81.876	0	323.31	89065000000	724
O00442	RNA 3-terminal phosphate cyclase	RTCA	251600000	273320000	295169984	325809984	250840000	370160000	299769984	206750000	275529984	171800000	265360000	280649984	275620000	10	10	10	36.1	36.1	36.1	39.336	0	19.812	3794300000	74
O00451;E5RGR6	GDNF family receptor alpha-2	GFRA2	0	0	0	0	0	0	161330000	0	0	0	0	0	0	4	4	4	9.3	9.3	9.3	51.543	0.00051164	3.8448	408570000	10
O00468;A0A087X208	Agrin;Agrin N-terminal 110 kDa subunit;Agrin C-terminal 110 kDa subunit;Agrin C-terminal 90 kDa fragment;Agrin C-terminal 22 kDa fragment	AGRN	336080000	285390016	429489984	278520000	463640000	339750016	335009984	596680000	492540000	429340000	472920000	461340000	355880000	30	30	30	19.1	19.1	19.1	217.32	0	117.55	5524100000	157
O00478;C9JUV8;C9JZT5;C9JQT8	Butyrophilin subfamily 3 member A3	BTN3A3	328489984	401289984	381830016	600499968	452380000	542099968	326510016	260510000	334009984	294729984	311940000	228910000	364780000	16	16	11	30.5	30.5	24	65.001	0	69.984	4976600000	97
O00483	Cytochrome c oxidase subunit NDUFA4	NDUFA4	833110016	1063299968	491369984	0	0	0	629649984	1297400064	1094000000	0	1206599936	1308999936	993120000	5	5	5	76.5	76.5	76.5	9.3697	0	11.431	10303000000	29
O00487	26S proteasome non-ATPase regulatory subunit 14	PSMD14	143250000	220380000	207490000	249000000	229130000	241970000	249400000	305080000	212840000	231550000	287240000	296710016	181450000	10	10	10	53.2	53.2	53.2	34.577	0	91.95	3676000000	77
O00499	Myc box-dependent-interacting protein 1	BIN1	3435300096	3218200064	3211099904	3015500032	3411699968	3061499904	3443500032	2916400128	2551699968	2784199936	3059899904	2905200128	2928000000	25	23	23	48.4	46.9	46.9	64.699	0	323.31	41956000000	321
O00505	Importin subunit alpha-4	KPNA3	353510016	362249984	397150016	349030016	383940000	389769984	399240000	350929984	342409984	462420000	459340000	350969984	386640000	15	9	9	45.7	35.1	35.1	57.81	0	205.01	5131000000	72
O00507	Probable ubiquitin carboxyl-terminal hydrolase FAF-Y	USP9Y	0	0	0	0	0	0	0	0	0	0	26175000	0	0	23	1	1	10.4	0.5	0.5	291.07	0.0016679	2.8656	34291000	1
O00519	Fatty-acid amide hydrolase 1	FAAH	0	43359000	41675000	35954000	0	0	0	62272000	0	0	0	0	68289000	7	7	7	24.7	24.7	24.7	63.065	0	10.256	610330000	20
O00534	von Willebrand factor A domain-containing protein 5A	VWA5A	230770000	200410000	235550000	250410000	184540000	311300000	238420000	317420000	207490000	397230016	275400000	151270000	195180000	20	20	20	32.8	32.8	32.8	86.488	0	124.58	3016500000	90
O00560;B4DHN5;E9PBU7	Syntenin-1	SDCBP	212400000	268540000	249120000	222420000	297260000	272729984	260200000	333380000	273609984	285310016	359040000	265430000	289980000	8	8	2	48.3	48.3	9.4	32.444	0	137.69	3720800000	82
O00562	Membrane-associated phosphatidylinositol transfer protein 1	PITPNM1	0	75857000	69957000	0	86609000	55535000	0	0	0	0	81710000	0	75437000	8	8	8	8.2	8.2	8.2	134.85	0	7.4213	640110000	33
O00625	Pirin	PIR	254120000	207990000	308160000	227210000	327750016	330990016	288180000	200320000	278009984	275670016	228910000	242190000	346630016	7	7	7	41	41	41	32.113	0	26.447	3651300000	48
O00629	Importin subunit alpha-3	KPNA4	1414099968	1203100032	1486700032	1376300032	1409900032	1764400000	1390800000	1023200000	1247200000	1423100032	1144000000	1248600064	1412300032	19	19	13	50.9	50.9	40.3	57.886	0	291.86	18236000000	205
O00743	Serine/threonine-protein phosphatase 6 catalytic subunit;Serine/threonine-protein phosphatase 6 catalytic subunit, N-terminally processed	PPP6C	370300000	420929984	406049984	435160000	353030016	362700000	428660000	341680000	345020000	313350016	363180000	398230016	364640000	12	12	12	47.9	47.9	47.9	35.144	0	86.816	5154400000	98
O00754	Lysosomal alpha-mannosidase;Lysosomal alpha-mannosidase A peptide;Lysosomal alpha-mannosidase B peptide;Lysosomal alpha-mannosidase C peptide;Lysosomal alpha-mannosidase D peptide;Lysosomal alpha-mannosidase E peptide	MAN2B1	0	0	68050000	0	0	0	0	0	0	0	0	0	0	3	3	3	4.2	4.2	4.2	113.74	0.00027293	5.2479	121750000	4
O00764;F2Z2Y4	Pyridoxal kinase	PDXK	8368999936	8074200064	8720000000	8112600064	7277400064	9572800512	8607200256	8370500096	7278499840	6503799808	7068599808	8216000000	6675500032	22	22	22	82.4	82.4	82.4	35.102	0	323.31	109590000000	335
O14490;Q6IS01;A8MYR7;A8MXQ8;A0A0A0MTP4	Disks large-associated protein 1	DLGAP1	99243000	99133000	88032000	0	91041000	115730000	82618000	0	72451000	0	104270000	99539000	82985000	8	8	8	12	12	12	108.87	0	32.436	1272100000	41
O14493;O95484;P56747;O15551	Claudin-4;Claudin-9;Claudin-6;Claudin-3	CLDN4;CLDN9;CLDN6;CLDN3	0	0	0	0	0	0	0	0	0	0	0	0	31611000	1	1	1	7.7	7.7	7.7	22.077	0.0077331	2.0825	37118000	1
O14494	Lipid phosphate phosphohydrolase 1	PPAP2A	0	0	0	0	0	0	0	0	17488000	0	0	0	0	2	2	2	15.5	15.5	15.5	32.156	0.0012189	3.1853	122340000	3
O14495;A0A286YES4	Lipid phosphate phosphohydrolase 3	PPAP2B	251540000	225020000	159390000	275720000	206380000	179030000	146530000	265830000	310380000	274369984	216040000	195070000	279500000	8	8	8	31.8	31.8	31.8	35.116	0	14.881	3087100000	59
O14521	Succinate dehydrogenase [ubiquinone] cytochrome b small subunit, mitochondrial	SDHD	0	0	0	0	0	0	0	0	0	0	0	68763000	0	2	2	2	20.8	20.8	20.8	17.043	0	16.23	129710000	4
O14525;B1AJS1	Astrotactin-1	ASTN1	165360000	237940000	0	178810000	189890000	312980000	165660000	166750000	238600000	0	188480000	207890000	184410000	11	11	11	13.4	13.4	13.4	144.91	0	90.563	2355500000	42
O14531;Q5T0Q6	Dihydropyrimidinase-related protein 4	DPYSL4	4344500224	4556499968	3910000128	4084900096	2996999936	3905799936	3917499904	3785900032	3336100096	4092900096	3935899904	2983800064	2902099968	28	28	28	70.5	70.5	70.5	61.877	0	323.31	53174000000	428
O14545	TRAF-type zinc finger domain-containing protein 1	TRAFD1	0	0	0	23799000	0	0	0	0	0	0	0	0	0	1	1	1	2.1	2.1	2.1	64.84	0.00027115	5.1096	23452000	1
O14548;E5RJZ1;H0YBD2	Cytochrome c oxidase subunit 7A-related protein, mitochondrial	COX7A2L	473700000	358220000	372800000	183300000	0	370140000	383209984	400140000	318950016	255830000	421870016	406200000	432849984	4	4	4	56.1	56.1	56.1	12.615	0	67.174	4733200000	32
O14558;A0A1X7SC65;K7EP04	Heat shock protein beta-6	HSPB6	544670016	444630016	599550016	662560000	330390016	764689984	564289984	514320000	849219968	309540000	301700000	450880000	505420000	9	9	9	93.1	93.1	93.1	17.135	0	175.03	7053800000	80
O14561;I3L505;H3BNK3	Acyl carrier protein, mitochondrial;Acyl carrier protein	NDUFAB1	0	74201000	57296000	0	0	0	0	0	75909000	0	0	0	84895000	2	2	2	15.4	15.4	15.4	17.417	0.00051533	3.9823	498380000	11
O14576;A0A0A0MTG2	Cytoplasmic dynein 1 intermediate chain 1	DYNC1I1	588449984	760780032	535990016	631420032	598720000	601539968	686590016	417960000	359820000	464000000	342860000	388440000	549800000	16	16	13	41.6	41.6	36.3	72.955	0	182.32	6975300000	113
O14594	Neurocan core protein	NCAN	3049799936	2682800128	2796199936	2973900032	2790400000	2357799936	4215800064	2572699904	2666899968	3093299968	2455899904	3184199936	2531500032	26	25	25	26.8	26.3	26.3	143.09	0	323.31	38856000000	290
O14617;A0A2R8Y4J3	AP-3 complex subunit delta-1	AP3D1	599729984	669840000	462280000	523160000	521560000	367760000	655169984	168370000	310710016	314569984	413689984	492280000	265170000	25	25	9	29.6	29.6	10.8	130.16	0	104.75	6061000000	152
O14656	Torsin-1A	TOR1A	0	0	0	0	0	0	0	0	0	0	0	0	20094000	2	2	2	7.5	7.5	7.5	37.808	0.00052397	4.2726	186360000	12
O14672	Disintegrin and metalloproteinase domain-containing protein 10	ADAM10	159780000	186420000	237940000	192860000	167780000	239300000	206280000	0	155580000	0	162590000	0	117600000	10	10	10	19.5	19.5	19.5	84.141	0	136.63	1983400000	61
O14744;H0YJX6	Protein arginine N-methyltransferase 5;Protein arginine N-methyltransferase 5, N-terminally processed	PRMT5	871129984	798259968	793870016	745849984	748129984	749950016	804860032	468540000	614659968	784830016	588670016	599310016	690179968	20	20	20	43.8	43.8	43.8	72.683	0	183.33	9625600000	134
O14745;J3QRP6	Na(+)/H(+) exchange regulatory cofactor NHE-RF1	SLC9A3R1	3825799936	3897299968	3106500096	4116800000	3776600064	3460699904	3048999936	4437300224	4251800064	3706400000	3203000064	3969999872	5083599872	20	20	20	58.9	58.9	58.9	38.868	0	323.31	51348000000	280
O14770;H0YMX5;U3KQI2;F5GYS8;H0YNY8;U3KPR8;O00470	Homeobox protein Meis2;Homeobox protein Meis1	MEIS2;MEIS1	0	71459000	0	0	0	0	0	0	98054000	0	0	0	0	7	7	7	24.5	24.5	24.5	51.789	0	11.059	728770000	14
O14772	Fucose-1-phosphate guanylyltransferase	FPGT	0	0	0	33242000	46742000	0	0	0	0	0	0	0	0	3	3	3	6.6	6.6	6.6	68.009	0	11.176	337140000	13
O14775	Guanine nucleotide-binding protein subunit beta-5	GNB5	759350016	583900032	643520000	631310016	637529984	654289984	594640000	425900000	359289984	492980000	549390016	597059968	534129984	7	7	4	24.8	24.8	16.5	43.566	0	51.56	7571900000	98
O14776;G3V220	Transcription elongation regulator 1	TCERG1	0	91295000	93512000	96020000	0	0	66336000	0	0	0	83014000	78031000	64438000	12	12	12	10.3	10.3	10.3	123.9	0	11.09	743510000	27
O14787;A0A075B780	Transportin-2	TNPO2	862700032	982419968	670470016	746329984	760110016	822489984	880569984	646750016	713510016	823560000	636190016	589480000	693699968	23	19	19	42.4	37	37	101.39	0	227.44	10510000000	186
O14807	Ras-related protein M-Ras	MRAS	0	0	0	0	0	0	0	88915000	0	87531000	0	0	0	5	5	5	34.6	34.6	34.6	23.846	0	7.6885	504130000	9
O14818;H0Y586	Proteasome subunit alpha type-7	PSMA7	2271800064	2164400128	2656199936	2276999936	2038599936	2313100032	1959100032	1976800000	1982300032	2054300032	2273299968	1924600064	1993799936	14	14	14	60.9	60.9	60.9	27.887	0	323.31	28905000000	217
O14828	Secretory carrier-associated membrane protein 3	SCAMP3	140360000	136360000	0	128310000	0	146980000	0	117960000	95627000	128330000	0	0	0	6	6	6	30.8	30.8	30.8	38.287	0	15.719	1291100000	25
O14841	5-oxoprolinase	OPLAH	239870000	229030000	273289984	259320000	231010000	259560000	219130000	295790016	285320000	0	257270000	223240000	261970000	19	19	19	18.6	18.6	18.6	137.46	0	79.219	3335700000	104
O14874	[3-methyl-2-oxobutanoate dehydrogenase [lipoamide]] kinase, mitochondrial	BCKDK	0	0	0	0	0	0	0	0	0	0	0	9247600	0	1	1	1	4.1	4.1	4.1	46.36	0.00027382	5.2932	62783000	6
O14879	Interferon-induced protein with tetratricopeptide repeats 3	IFIT3	725110016	517470016	2359699968	726700032	754240000	238730000	694259968	975209984	748640000	457910016	2633799936	457110016	678780032	20	20	20	62.2	62.2	62.2	55.984	0	323.31	13487000000	164
Q5VV89;O14880;Q5VV87	Microsomal glutathione S-transferase 3	MGST3	897240000	995240000	1095800064	685070016	671080000	791440000	983480000	1662099968	1739200000	1503800064	1692700032	1811100032	1541400064	7	7	7	62.7	62.7	62.7	18.416	0	276.57	18332000000	143
O14907	Tax1-binding protein 3	TAX1BP3	0	0	0	0	0	0	0	0	0	0	0	0	94026000	1	1	1	13.7	13.7	13.7	13.735	0.00052576	4.3767	1419400000	15
O14908	PDZ domain-containing protein GIPC1	GIPC1	0	0	0	182140000	0	139470000	224450000	156240000	0	155850000	146240000	0	0	5	5	5	20.4	20.4	20.4	36.049	0	20.546	1337100000	27
O14910;H0YIA8;H0YI92	Protein lin-7 homolog A	LIN7A	1677699968	1544400000	1360899968	1403800064	1379800064	1617400064	1519000064	1550300032	1532499968	1224300032	1291000064	1249799936	1596000000	10	10	4	45.1	45.1	18.9	25.996	0	54.245	19930000000	117
O14920;G3V105;E5RGW5	Inhibitor of nuclear factor kappa-B kinase subunit beta	IKBKB	0	0	48187000	61268000	0	0	0	0	0	0	0	0	0	7	7	6	10.6	10.6	9.5	86.563	0	8.9053	390310000	25
O14924	Regulator of G-protein signaling 12	RGS12	0	0	0	0	0	0	0	55941000	0	0	0	0	35494000	5	5	5	4.1	4.1	4.1	156.36	0	9.2077	175020000	9
O14933;E9PQT7	Ubiquitin/ISG15-conjugating enzyme E2 L6	UBE2L6	155010000	149290000	225170000	147760000	168990000	94312000	120860000	88029000	155960000	0	212220000	104990000	83230000	6	6	6	50.3	50.3	50.3	17.769	0	48.292	1849400000	45
O14936;A0A2U3TZM1;A0A2R8YE77;Q5JS74	Peripheral plasma membrane protein CASK	CASK	802220032	761980032	620990016	717539968	731670016	508929984	843190016	683889984	943440000	717049984	771849984	868220032	583699968	36	36	0	44.9	44.9	0	105.12	0	225.24	9867100000	211
O14939	Phospholipase D2	PLD2	0	0	0	0	0	0	0	0	0	0	38105000	0	33233000	2	2	2	3.6	3.6	3.6	105.99	0.0007593	3.6871	134830000	7
O14949	Cytochrome b-c1 complex subunit 8	UQCRQ	111310000	170370000	0	0	135970000	0	199860000	197420000	0	0	316649984	0	0	4	4	4	35.4	35.4	35.4	9.9062	0	41.334	2067100000	25
O14957	Cytochrome b-c1 complex subunit 10	UQCR11	0	0	0	0	0	0	0	0	0	0	0	43401000	0	1	1	1	21.4	21.4	21.4	6.5696	0.0020999	2.6375	136170000	3
O14964;I3L1P5	Hepatocyte growth factor-regulated tyrosine kinase substrate	HGS	575400000	640369984	431620000	619200000	563889984	875329984	521969984	697270016	520950016	414929984	511409984	537190016	609670016	19	19	19	24.2	24.2	24.2	86.191	0	176.13	7640600000	123
O14966;P57729;Q13637	Ras-related protein Rab-7L1;Ras-related protein Rab-38;Ras-related protein Rab-32	RAB29;RAB38;RAB32	38963000	0	0	0	0	52783000	0	0	0	0	0	0	0	2	2	2	10.8	10.8	10.8	23.155	0.0025492	2.5646	243750000	16
O14967	Calmegin	CLGN	0	0	0	0	0	0	0	0	0	0	0	0	42155000	3	2	2	6.4	4.4	4.4	70.038	0.001673	2.9064	99200000	5
O14974;F8VZN8	Protein phosphatase 1 regulatory subunit 12A	PPP1R12A	88787000	135200000	164640000	244650000	194430000	0	231650000	168630000	270310016	40394000	133190000	234480000	190770000	14	14	14	13.8	13.8	13.8	115.28	0	124.58	2244400000	61
O14975	Very long-chain acyl-CoA synthetase	SLC27A2	0	0	0	0	0	0	0	0	0	0	0	0	13294000	1	1	1	3.2	3.2	3.2	70.311	0.00052002	4.1283	56955000	4
O14976	Cyclin-G-associated kinase	GAK	171450000	64315000	78834000	100940000	356800000	0	136330000	144700000	125130000	0	154450000	0	96839000	9	9	9	10.4	10.4	10.4	143.19	0	169.56	1618700000	44
O14980	Exportin-1	XPO1	1771299968	1725200000	1381400064	1555699968	1940000000	1542599936	2049299968	2087900032	1826499968	1470800000	1969799936	2080099968	1856000000	36	36	36	43.2	43.2	43.2	123.38	0	323.31	24606000000	368
O14994;A0A0A0MR68	Synapsin-3	SYN3	411710016	395369984	369460000	352860000	266960000	297489984	351110016	254860000	220210000	253810000	283520000	310920000	232610000	20	17	17	45.3	42.4	42.4	63.302	0	204.04	4141100000	91
O15020	Spectrin beta chain, non-erythrocytic 2	SPTBN2	4537099776	4163000064	3262299904	3434800128	4064900096	3322099968	3335099904	3255300096	2907200000	2709100032	3827699968	3376600064	3180100096	92	78	78	47.4	42.6	42.6	271.32	0	323.31	47671000000	711
O15031	Plexin-B2	PLXNB2	564350016	700220032	703080000	629350016	710849984	361089984	505840000	752470016	814889984	240220000	679750016	758640000	673160000	36	36	35	28.5	28.5	28.1	205.12	0	245.42	8685600000	213
O15040	Tectonin beta-propeller repeat-containing protein 2	TECPR2	0	0	0	0	0	0	16658000	0	0	0	0	0	0	10	10	10	9.4	9.4	9.4	153.85	0	12.536	129220000	13
O15066	Kinesin-like protein KIF3B;Kinesin-like protein KIF3B, N-terminally processed	KIF3B	77644000	0	0	85556000	84562000	0	0	65732000	70599000	0	120770000	102830000	105140000	7	7	7	14.2	14.2	14.2	85.124	0	49.433	851620000	32
O15067	Phosphoribosylformylglycinamidine synthase	PFAS	453649984	468350016	390060000	511100000	529600000	355480000	326489984	517550016	421729984	389240000	417940000	428390016	388880000	20	20	20	23.2	23.2	23.2	144.73	0	89.978	5728000000	149
O15075	Serine/threonine-protein kinase DCLK1	DCLK1	4684400128	4825600000	3511300096	5413700096	3901199872	4339599872	5612299776	4223600128	5099800064	4451899904	3996699904	5108800000	4836299776	29	29	11	48.4	48.4	25	82.223	0	323.31	61629000000	419
O15083;H7C4G9	ERC protein 2	ERC2	187490000	222400000	182480000	274060000	211270000	276310016	261520000	133240000	122760000	164240000	202080000	184770000	183680000	15	15	9	15.6	15.6	10.4	110.56	0	43.507	2723800000	50
O15085	Rho guanine nucleotide exchange factor 11	ARHGEF11	0	0	0	0	0	0	0	0	0	0	0	11586000	0	4	4	4	2.6	2.6	2.6	167.7	0.00051138	3.8258	95642000	11
O15111	Inhibitor of nuclear factor kappa-B kinase subunit alpha	CHUK	21662000	0	0	0	0	0	0	0	0	0	0	0	0	6	5	5	8.9	7.8	7.8	84.639	0.00028417	6.0544	97023000	9
O15116	U6 snRNA-associated Sm-like protein LSm1	LSM1	0	0	0	0	0	0	0	0	0	211290000	0	0	0	3	3	3	31.6	31.6	31.6	15.179	0.00028703	6.3501	450090000	19
O15126;A0A087WXB0	Secretory carrier-associated membrane protein 1	SCAMP1	0	0	218890000	227210000	171750000	214230000	0	0	0	0	0	0	0	7	7	7	27.8	27.8	27.8	37.92	0	60.522	1687400000	29
O15127;H3BV04;H3BN93;H3BUB6;H3BPL9	Secretory carrier-associated membrane protein 2	SCAMP2	0	0	0	96790000	0	0	0	0	0	0	0	0	100350000	2	2	2	9.7	9.7	9.7	36.648	0	74.758	461530000	13
O15143;C9JEY1;C9K057	Actin-related protein 2/3 complex subunit 1B	ARPC1B	0	0	209670000	0	0	0	0	0	0	202620000	0	0	0	12	3	3	40.9	9.9	9.9	40.949	0	7.3939	668650000	10
O15144	Actin-related protein 2/3 complex subunit 2	ARPC2	3009700096	3378899968	3631099904	3444499968	3005700096	3113100032	3418599936	2904900096	2786099968	3364499968	3121700096	3104199936	2889600000	26	26	26	80	80	80	34.333	0	296.4	43629000000	325
O15145;C9JZD1	Actin-related protein 2/3 complex subunit 3	ARPC3	1175000064	1542400000	1497299968	1657600000	1382499968	1728000000	1580400000	1623900032	1510000000	1364300032	1487600000	1468099968	1470800000	9	9	9	59	59	59	20.546	0	58.829	21458000000	121
O15173	Membrane-associated progesterone receptor component 2	PGRMC2	252690000	0	0	205680000	0	0	0	259410000	282020000	277040000	244760000	0	256660000	6	5	5	34.1	30	30	23.818	0	16.193	2121800000	40
O15211	Ral guanine nucleotide dissociation stimulator-like 2	RGL2	0	0	0	0	0	0	0	0	11385000	0	0	0	0	1	1	1	1.7	1.7	1.7	83.548	0.0016819	2.9671	39714000	3
O15212;A2AB88	Prefoldin subunit 6	PFDN6	0	0	0	0	0	0	0	0	0	0	0	0	72475000	2	2	2	14.7	14.7	14.7	14.582	0.0041162	2.4043	137300000	3
O15217	Glutathione S-transferase A4	GSTA4	39341000	62880000	54424000	60146000	91939000	0	66959000	46739000	64552000	0	0	73689000	0	3	3	3	22.1	22.1	22.1	25.704	0	15.517	676130000	24
O15230	Laminin subunit alpha-5	LAMA5	681129984	694179968	634390016	409889984	756270016	517720000	458270016	722099968	922550016	962169984	884080000	574259968	434480000	42	42	42	16.8	16.8	16.8	399.73	0	290.27	8738300000	176
O15240;Q05BJ3	Neurosecretory protein VGF;Neuroendocrine regulatory peptide-1;Neuroendocrine regulatory peptide-2;Antimicrobial peptide VGF[554-577]	VGF	391289984	201490000	161110000	154030000	197050000	0	0	0	0	0	167360000	182380000	0	13	13	13	30.7	30.7	30.7	67.257	0	34.415	1622700000	37
O15254	Peroxisomal acyl-coenzyme A oxidase 3	ACOX3	0	0	0	0	0	0	0	0	0	0	35467000	0	0	3	3	3	5.6	5.6	5.6	77.628	0	7.1601	128440000	13
Q5T8U5;O15260;B7Z1G8	Surfeit locus protein 4	SURF4	0	0	75586000	91560000	0	72704000	97025000	75161000	84510000	0	91664000	0	52785000	4	4	4	30.1	30.1	30.1	21.127	0	19.24	816420000	25
O15269;A0A2R8Y4S0;A0A2R8Y6A2	Serine palmitoyltransferase 1	SPTLC1	0	0	0	0	0	0	0	16441000	0	0	0	0	0	2	2	2	5.9	5.9	5.9	52.743	0.0005119	3.8617	15572000	5
O15294	UDP-N-acetylglucosamine--peptide N-acetylglucosaminyltransferase 110 kDa subunit	OGT	617040000	551590016	471700000	500550016	530440000	527430016	480489984	533849984	467929984	536150016	525520000	491200000	532120000	26	26	26	33.7	33.7	33.7	116.92	0	87.481	7081400000	160
O15354	Prosaposin receptor GPR37	GPR37	0	0	70394000	0	0	0	0	0	0	0	0	0	0	3	3	3	6.5	6.5	6.5	67.113	0.0085508	2.0204	341330000	6
O15355	Protein phosphatase 1G	PPM1G	0	63360000	0	0	0	0	0	0	0	0	70069000	0	67341000	6	6	6	15.4	15.4	15.4	59.271	0	83.045	654700000	26
O15371	Eukaryotic translation initiation factor 3 subunit D	EIF3D	267780000	261040000	182770000	242060000	270729984	280880000	271400000	226080000	288960000	233710000	258070000	291800000	249820000	8	8	8	23.9	23.9	23.9	63.972	0	67.08	3341500000	77
O15400	Syntaxin-7	STX7	691160000	681720000	500920000	624550016	602550016	442680000	536350016	562840000	479580000	483440000	418870016	401020000	525240000	10	10	10	62.8	62.8	62.8	29.815	0	256.79	7082200000	94
O15498	Synaptobrevin homolog YKT6	YKT6	391430016	379200000	411110016	404929984	366980000	384000000	431820000	322990016	379960000	0	345900000	278880000	418689984	7	7	7	46	46	46	22.417	0	71.096	4901000000	82
O15511;B1ALC0	Actin-related protein 2/3 complex subunit 5	ARPC5	0	0	604110016	611209984	476489984	0	460220000	527340000	456160000	457089984	454620000	477849984	480550016	4	3	3	34.4	29.1	29.1	16.32	0	30.965	5404400000	33
O15523	ATP-dependent RNA helicase DDX3Y	DDX3Y	0	0	108480000	0	0	0	0	66608000	0	0	0	0	0	25	3	3	45.9	7	7	73.153	0	14.565	297030000	10
O15540	Fatty acid-binding protein, brain	FABP7	2808300032	4664099840	4220699904	3106500096	4577200128	4160600064	3537299968	10357999616	6311699968	4672900096	6435700224	5891400192	8137099776	11	11	11	68.9	68.9	68.9	14.889	0	313.08	73291000000	229
O43143	Pre-mRNA-splicing factor ATP-dependent RNA helicase DHX15	DHX15	547400000	403329984	538009984	415060000	394150016	365400000	438329984	402080000	452200000	206830000	619390016	488420000	294649984	23	23	23	35.7	35.7	35.7	90.932	0	51.525	6480100000	120
O43148;K7EP06	mRNA cap guanine-N7 methyltransferase	RNMT	52505000	0	0	53758000	0	0	0	0	0	0	0	0	0	3	3	3	8.2	8.2	8.2	54.843	0.00053248	4.6128	377010000	14
O43149	Zinc finger ZZ-type and EF-hand domain-containing protein 1	ZZEF1	0	0	0	0	0	0	110570000	0	0	0	0	0	117180000	4	4	4	2	2	2	331.07	0.00053505	4.7577	273150000	8
O43150	Arf-GAP with SH3 domain, ANK repeat and PH domain-containing protein 2	ASAP2	0	0	0	0	0	0	71147000	61706000	0	0	54113000	0	55337000	7	6	6	10.9	9.9	9.9	111.65	0	14.38	1071500000	17
O43157	Plexin-B1	PLXNB1	891790016	707760000	849120000	934579968	919379968	721280000	997929984	954600000	985040000	1082700032	857430016	917769984	956400000	38	38	37	27.1	27.1	26.7	232.3	0	298.74	12153000000	264
O43166;F5GYF8	Signal-induced proliferation-associated 1-like protein 1	SIPA1L1	0	99078000	0	0	0	0	0	67737000	0	0	0	75554000	0	13	13	13	11.1	11.1	11.1	200.03	0	20.81	815690000	24
O43172	U4/U6 small nuclear ribonucleoprotein Prp4	PRPF4	0	69789000	0	0	0	0	0	0	0	0	0	0	0	6	6	6	14.4	14.4	14.4	58.449	0	8.4015	366640000	19
O43181	NADH dehydrogenase [ubiquinone] iron-sulfur protein 4, mitochondrial	NDUFS4	845329984	716449984	602160000	652339968	454480000	673040000	673270016	232960000	293369984	596849984	378350016	323470016	309910016	6	6	6	41.1	41.1	41.1	20.108	0	36.77	6817400000	59
O43236;J3QRT6;J3KSZ7	Septin-4	2004-09-01	394649984	451790016	341080000	344329984	472740000	311569984	600880000	356449984	323350016	468009984	411030016	333470016	471249984	11	11	11	34.1	34.1	34.1	55.098	0	56.89	5422800000	66
O43237;B4E2E0	Cytoplasmic dynein 1 light intermediate chain 2	DYNC1LI2	2108099968	2340000000	2319300096	2510799872	1995699968	2579699968	2499699968	1959600000	2118300032	2487000064	2022599936	1733500032	2339399936	29	29	27	75.4	75.4	72.8	54.099	0	323.31	30140000000	260
O43242	26S proteasome non-ATPase regulatory subunit 3	PSMD3	544550016	536240000	473080000	463740000	379260000	392060000	495150016	570480000	500960000	513140000	557089984	523760000	428020000	22	22	22	44.8	44.8	44.8	60.977	0	61.145	6736700000	180
O43252	Bifunctional 3-phosphoadenosine 5-phosphosulfate synthase 1;Sulfate adenylyltransferase;Adenylyl-sulfate kinase	PAPSS1	0	0	104590000	0	0	0	0	0	0	0	0	0	72656000	6	6	5	15.9	15.9	13.6	70.832	0	11.66	569640000	17
O43264	Centromere/kinetochore protein zw10 homolog	ZW10	0	63164000	0	69279000	67885000	54236000	0	0	0	48218000	72543000	0	48479000	4	4	4	8.2	8.2	8.2	88.828	0	54.003	628090000	30
O43294	Transforming growth factor beta-1-induced transcript 1 protein	TGFB1I1	59397000	69480000	0	0	0	0	0	0	0	0	0	0	0	4	4	4	10	10	10	49.814	0	58.879	287580000	17
O43295	SLIT-ROBO Rho GTPase-activating protein 3	SRGAP3	252430000	225710000	221670000	200040000	229470000	198430000	250520000	176530000	197230000	145320000	194750000	222920000	0	18	18	18	21	21	21	124.5	0	99.983	2639000000	79
O43301	Heat shock 70 kDa protein 12A	HSPA12A	5528600064	5185999872	4686700032	4687000064	4470400000	4571599872	5603999744	3033400064	2864100096	4394699776	3969200128	3856199936	3830700032	32	32	2	48	48	3.7	74.977	0	323.31	57919000000	403
O43310	CBP80/20-dependent translation initiation factor	CTIF	0	0	0	0	0	30911000	0	0	33266000	0	0	0	0	5	5	5	9.5	9.5	9.5	67.586	0	12.919	278810000	17
O43324;D6RBD7;C9J1V9;H0YAL7	Eukaryotic translation elongation factor 1 epsilon-1	EEF1E1;EEF1E1-BLOC1S5	220680000	275689984	260790000	226820000	131260000	319160000	249220000	342750016	244030000	240310000	241520000	251780000	263440000	7	7	7	50.6	50.6	50.6	19.81	0	17.084	3348600000	79
O43347	RNA-binding protein Musashi homolog 1	MSI1	0	0	51483000	0	0	0	0	0	57499000	0	0	0	0	6	4	4	26.5	21	21	39.124	0	53.449	332140000	14
O43390;B4DT28	Heterogeneous nuclear ribonucleoprotein R	HNRNPR	2149400064	2266099968	2714200064	2078800000	2131299968	2559200000	2468400128	1846700032	1962700032	2228999936	1976099968	2053500032	1551699968	24	24	19	43	43	35.4	70.942	0	88.56	28771000000	220
O43396;K7ER96;K7EML9	Thioredoxin-like protein 1	TXNL1	1185400064	1548899968	1593299968	1629900032	1483699968	1461100032	1464499968	1438800000	1376499968	1596199936	1506200064	1509100032	1708199936	12	12	12	57.8	57.8	57.8	32.251	0	180.19	21052000000	165
O43427;H0YCE7;E9PSD3	Acidic fibroblast growth factor intracellular-binding protein	FIBP	168550000	200160000	161680000	184890000	166380000	156840000	161180000	204730000	137360000	122100000	173690000	171800000	206610000	9	9	9	27.7	27.7	27.7	41.878	0	28.09	2290800000	59
O43488;H3BLU7	Aflatoxin B1 aldehyde reductase member 2	AKR7A2	5272399872	4623900160	5696600064	5857900032	5469300224	6025600000	5265500160	6571200000	6381300224	5494700032	5560399872	5387400192	6536500224	12	12	8	41.5	41.5	31.8	39.589	0	274.57	78364000000	285
O43491	Band 4.1-like protein 2	EPB41L2	0	0	0	0	0	0	0	0	12983000	0	0	0	0	48	1	0	50.5	1	0	112.59	0.0034491	2.452	14141000	1
O43493	Trans-Golgi network integral membrane protein 2	TGOLN2	0	0	0	0	0	0	0	0	0	0	15307000	0	0	1	1	1	2.9	2.9	2.9	51.018	0.0016839	2.9874	40618000	4
O43505	Beta-1,4-glucuronyltransferase 1	B4GAT1	0	0	0	0	0	0	0	0	0	0	87793000	0	0	3	3	3	12.8	12.8	12.8	47.119	0	10.274	297010000	9
O43581	Synaptotagmin-7	SYT7	198810000	179630000	237580000	200020000	0	191960000	212340000	0	0	0	0	0	0	9	9	8	31.8	31.8	28.5	45.501	0	17.742	1606600000	31
O43583;F8VVL1	Density-regulated protein	DENR	0	159620000	199640000	187810000	157100000	215060000	154430000	363830016	256790000	458100000	189180000	227250000	270580000	5	5	5	26.8	26.8	26.8	22.092	0	96.164	2860300000	39
O43592	Exportin-T	XPOT	677459968	639670016	640120000	668440000	787910016	733260032	779880000	897510016	776019968	803180032	692209984	686929984	764329984	31	31	31	47.4	47.4	47.4	109.96	0	161.44	9835100000	207
O43615;M0QXU7	Mitochondrial import inner membrane translocase subunit TIM44	TIMM44	326180000	256790000	320009984	289000000	224800000	445100000	278150016	206770000	211430000	0	276830016	233540000	215370000	16	16	16	37.8	37.8	37.8	51.355	0	23.973	3546300000	80
O43617;A0A087WWM0;A6NKE1	Trafficking protein particle complex subunit 3	TRAPPC3	193480000	160890000	109200000	111780000	148910000	149690000	131740000	150010000	153310000	0	149220000	133500000	135170000	9	9	9	47.2	47.2	47.2	20.274	0	18.917	1887600000	42
O43633;M0R1L7;M0R1T5	Charged multivesicular body protein 2a	CHMP2A	0	0	0	0	0	0	0	173990000	163510000	0	0	144780000	0	3	3	3	15.8	15.8	15.8	25.104	0.0062167	2.1446	1438600000	13
O43639;E7EPF5	Cytoplasmic protein NCK2	NCK2	0	0	0	0	0	0	0	0	0	0	0	0	80920000	3	2	2	12.9	10.8	10.8	42.915	0.00075567	3.6298	346400000	13
O43660;B7Z982;D6RA26	Pleiotropic regulator 1	PLRG1	0	0	0	0	0	0	0	0	0	0	0	32970000	0	4	4	4	9.9	9.9	9.9	57.193	0.00098522	3.3254	116150000	7
O43665	Regulator of G-protein signaling 10	RGS10	0	0	0	0	0	0	0	0	97780000	0	0	0	76340000	4	4	4	32.9	32.9	32.9	20.236	0	19.642	599210000	16
O43676;C9JKQ2	NADH dehydrogenase [ubiquinone] 1 beta subcomplex subunit 3	NDUFB3	402350016	312590016	223240000	146420000	213370000	170770000	217330000	181420000	0	252130000	252400000	267560000	215180000	2	2	2	21.4	21.4	21.4	11.402	0	12.73	3111600000	39
O43678	NADH dehydrogenase [ubiquinone] 1 alpha subcomplex subunit 2	NDUFA2	266250000	248080000	170730000	0	168070000	181450000	206690000	196040000	197600000	138040000	0	264410000	168900000	3	3	3	41.4	41.4	41.4	10.921	0	64.892	2479500000	31
O43681;A0A087WXS7	ATPase ASNA1	ASNA1	1740700032	1755200000	1642499968	1662700032	1650000000	1656999936	1624800000	1356800000	1441699968	1400499968	1502899968	1372199936	1486499968	14	14	14	60.3	60.3	60.3	38.792	0	323.31	21355000000	244
O43707;F5GXS2	Alpha-actinin-4	ACTN4	16565000192	17358000128	13776000000	16295999488	20447000576	14641000448	15989000192	13475000320	12012000256	13539999744	13363999744	13571000320	11996000256	65	65	18	73.2	73.2	20.5	104.85	0	323.31	201690000000	1161
O43719;Q5H919;Q5H918	HIV Tat-specific factor 1	HTATSF1	0	0	0	0	63741000	0	0	0	0	0	0	0	0	4	4	4	5.6	5.6	5.6	85.852	0.00074888	3.4938	204780000	6
O43741	5-AMP-activated protein kinase subunit beta-2	PRKAB2	0	0	0	75235000	0	0	0	0	0	0	0	0	0	3	3	3	21	21	21	30.302	0.00074813	3.4733	241050000	8
O43747	AP-1 complex subunit gamma-1	AP1G1	1040099968	1001699968	819950016	972849984	805740032	769900032	872640000	876790016	802590016	631809984	917800000	1050000000	805820032	21	21	21	33.3	33.3	33.3	91.35	0	158.66	12513000000	203
O43752	Syntaxin-6	STX6	43346000	0	0	0	49928000	0	51691000	0	0	0	0	0	0	4	4	4	18	18	18	29.176	0.00052562	4.373	245410000	10
O43761;Q96L30	Synaptogyrin-3	SYNGR3	487440000	0	622080000	402489984	391649984	0	440600000	404150016	0	414340000	455670016	395830016	522220000	5	5	5	24.5	24.5	24.5	24.555	0	36.349	5253600000	47
O43765;K7EMD6	Small glutamine-rich tetratricopeptide repeat-containing protein alpha	SGTA	809430016	835830016	661600000	851289984	964190016	1062700032	755299968	734440000	794590016	820339968	697280000	799280000	742000000	9	9	9	34.8	34.8	34.8	34.063	0	67.978	10895000000	97
O43772;C9JPE1	Mitochondrial carnitine/acylcarnitine carrier protein	SLC25A20	102170000	137190000	219750000	164490000	111510000	191210000	167990000	309460000	202340000	0	192360000	150490000	0	8	8	8	27.9	27.9	27.9	32.943	0	14.625	2082700000	52
O43776	Asparagine--tRNA ligase, cytoplasmic	NARS	2384900096	2177200128	2397499904	2086400000	1925699968	2000499968	2155300096	2022400000	2262599936	2185200128	1973200000	2117699968	2120400000	23	23	23	46.9	46.9	46.9	62.942	0	323.31	29235000000	327
O43809;H3BND3;H3BV41	Cleavage and polyadenylation specificity factor subunit 5	NUDT21	579500032	567240000	560769984	472550016	493980000	573750016	496849984	550729984	490560000	246470000	623129984	558840000	378560000	10	10	10	60.4	60.4	60.4	26.227	0	85.433	7023700000	96
O43813;E9PHS0	LanC-like protein 1	LANCL1	4152800000	3919099904	2942000128	3022000128	3208499968	2655200000	3471500032	3148900096	2730299904	2779699968	2768000000	3585200128	2770800128	18	18	18	58.4	58.4	58.4	45.283	0	323.31	42904000000	257
O43815	Striatin	STRN	129320000	105740000	115740000	172960000	134490000	132660000	139490000	135450000	124010000	0	111310000	112520000	154270000	10	10	10	21.8	21.8	21.8	86.131	0	18.769	1692200000	47
O43852	Calumenin	CALU	194400000	227630000	245630000	162370000	302870016	194950000	251990000	0	0	0	200120000	163820000	145060000	9	9	9	38.7	38.7	38.7	37.106	0	26.271	2360700000	66
O43865	Putative adenosylhomocysteinase 2	AHCYL1	12257999872	11530000384	9615800320	14000000000	11601999872	14679000064	12188999680	14072000512	12753000448	15192999936	11278999552	10952999936	12291000320	31	31	20	67.5	67.5	48.3	58.951	0	323.31	156410000000	577
O43920	NADH dehydrogenase [ubiquinone] iron-sulfur protein 5	NDUFS5	724300032	821699968	659529984	494540000	447190016	623160000	649830016	490860000	612950016	586510016	673150016	698000000	573400000	6	6	6	57.5	57.5	57.5	12.517	0	27.533	8206700000	71
O43924;B8ZZK5;C9IZ52	Retinal rod rhodopsin-sensitive cGMP 3,5-cyclic phosphodiesterase subunit delta	PDE6D	224950000	0	188630000	0	0	0	204630000	251050000	286649984	0	0	0	305600000	4	4	4	33.3	33.3	33.3	17.42	0	8.3545	2307800000	28
O60216	Double-strand-break repair protein rad21 homolog	RAD21	95776000	90649000	0	121640000	0	0	0	104550000	0	0	0	0	0	7	7	7	13.3	13.3	13.3	71.689	0	9.9627	670680000	24
O60234;M0R0C1;M0QYJ8;M0QYG8;M0R1D2	Glia maturation factor gamma	GMFG	0	0	0	90117000	0	0	0	0	0	0	0	0	0	5	3	3	58.5	33.1	33.1	16.801	0	7.8245	231090000	8
O60237;Q6GQY8;H7C4R6	Protein phosphatase 1 regulatory subunit 12B	PPP1R12B	0	0	0	0	0	0	0	0	0	0	0	31728000	0	2	2	2	3.2	3.2	3.2	110.4	0	7.5916	286280000	11
O60245;H0YAH0	Protocadherin-7	PCDH7	0	0	0	0	0	0	0	0	0	0	0	0	15260000	3	3	3	4.2	4.2	4.2	116.07	0	8.0152	135440000	12
O60256;E7EPA1;C9JJS3;C9K0K7;C9JDU5	Phosphoribosyl pyrophosphate synthase-associated protein 2	PRPSAP2	993820032	1002600000	751000000	1026000000	819740032	991150016	894499968	1066600000	1007000000	841280000	931670016	1067100032	1039600000	16	16	15	56.4	56.4	52.6	40.925	0	76.62	13153000000	131
O60268;H3BMU3	Uncharacterized protein KIAA0513	KIAA0513	857440000	780089984	625350016	884320000	794099968	885089984	709299968	965689984	552579968	709649984	715369984	898150016	865920000	17	17	17	44.3	44.3	44.3	46.638	0	46.079	10618000000	113
O60271;A0A087X2D8	C-Jun-amino-terminal kinase-interacting protein 4	SPAG9	212640000	182210000	133630000	235260000	215550000	235380000	128590000	255230000	174100000	163900000	164490000	188370000	200980000	17	14	14	17.8	15.8	15.8	146.2	0	170.53	2508000000	81
O60282;A0A0G2JMZ6	Kinesin heavy chain isoform 5C	KIF5C	1045299968	827089984	960510016	912060032	880800000	947619968	920720000	812609984	740120000	875470016	827950016	890819968	837550016	39	28	25	46	34.4	30.3	109.49	0	323.31	11967000000	244
O60313;A0A2R8YDM2;A0A2R8Y3X5;A0A2R8YE78;C9JMB8;A0A2R8YGE5	Dynamin-like 120 kDa protein, mitochondrial;Dynamin-like 120 kDa protein, form S1	OPA1	4074400000	3893799936	3395500032	3539399936	3552800000	3497600000	3891399936	2836400128	3083899904	3261499904	3821900032	3363899904	3658599936	48	48	1	55.3	55.3	1.5	111.63	0	323.31	47753000000	465
O60331	Phosphatidylinositol 4-phosphate 5-kinase type-1 gamma	PIP5K1C	595900032	548609984	578969984	674460032	478280000	535350016	591430016	521270016	436190016	521840000	508009984	584259968	530200000	17	17	15	36.4	36.4	33.1	73.259	0	107.66	7293500000	103
O60346	PH domain leucine-rich repeat-containing protein phosphatase 1	PHLPP1	0	0	0	14739000	0	0	0	0	0	0	0	0	0	1	1	1	1.7	1.7	1.7	184.67	0.00052729	4.4259	14524000	1
O60443;C9JSR4	Non-syndromic hearing impairment protein 5	DFNA5	319880000	307609984	202720000	0	202010000	170710000	277720000	362489984	356520000	159700000	274369984	283680000	305020000	15	15	15	42.3	42.3	42.3	54.554	0	87.091	3432000000	81
O60462	Neuropilin-2	NRP2	0	0	0	0	0	0	0	0	0	0	0	0	34284000	2	2	2	3.7	3.7	3.7	104.83	0.0049819	2.3303	61440000	2
O60477	BMP/retinoic acid-inducible neural-specific protein 1	BRINP1	0	0	51481000	0	0	0	0	0	0	0	0	0	0	6	6	5	8.1	8.1	6.7	88.76	0.00029274	6.9062	454450000	17
O60486;B4DHQ7	Plexin-C1	PLXNC1	0	26462000	0	0	0	0	0	0	0	0	0	0	0	5	4	4	4.1	3.7	3.7	175.74	0.00027724	5.5161	153980000	11
O60488	Long-chain-fatty-acid--CoA ligase 4	ACSL4	64815000	0	76388000	68927000	0	0	73092000	0	0	71924000	0	0	59496000	6	4	4	13.8	9.7	9.7	79.187	0	13.562	557060000	21
O60493	Sorting nexin-3	SNX3	486760000	546460032	551699968	597800000	553100032	606449984	542750016	530400000	467430016	545870016	421900000	436720000	479680000	10	10	10	46.9	46.9	46.9	18.762	0	37.633	6774400000	98
O60502	Protein O-GlcNAcase	MGEA5	811590016	607990016	466520000	540760000	654280000	636419968	644179968	620640000	614680000	206250000	607459968	610529984	621110016	23	23	23	31.3	31.3	31.3	102.91	0	166.33	8069900000	179
O60504;H0YAZ3;H0YB51	Vinexin	SORBS3	0	73379000	72889000	119780000	96320000	92788000	0	88536000	88157000	0	57231000	0	0	8	8	8	19.2	19.2	19.2	75.34	0	20.371	861680000	29
O60506;B7Z645	Heterogeneous nuclear ribonucleoprotein Q	SYNCRIP	537790016	575280000	681110016	690849984	535980000	564950016	632040000	471660000	514780000	451160000	482169984	441790016	488689984	20	15	15	29.5	21.8	21.8	69.602	0	104.47	7231600000	83
O60518	Ran-binding protein 6	RANBP6	0	94824000	205710000	50525000	83540000	0	152780000	61354000	77745000	95947000	149790000	78780000	0	8	6	6	9.7	8	8	124.71	0	55.301	1242900000	40
O60547	GDP-mannose 4,6 dehydratase	GMDS	108380000	99115000	83354000	112030000	96604000	129340000	84346000	0	91255000	0	103960000	68842000	105920000	8	8	8	30.6	30.6	30.6	41.949	0	12.489	1232700000	40
Q5VUC6;O60551	Glycylpeptide N-tetradecanoyltransferase;Glycylpeptide N-tetradecanoyltransferase 2	NMT2	0	0	0	0	0	0	0	0	17685000	0	0	0	0	6	2	2	17.1	6.6	6.6	56.716	0.00075	3.513	143840000	16
O60645;D6RB59	Exocyst complex component 3	EXOC3	639510016	743190016	461120000	523049984	640769984	697520000	667089984	391640000	662129984	629440000	678110016	703219968	358820000	13	13	13	18.3	18.3	18.3	86.844	0	32.481	8100600000	68
O60664;K7ERZ3	Perilipin-3	PLIN3	1155200000	1401200000	1075299968	2121900032	1360899968	1895600000	1130599936	2771899904	2112999936	1904999936	1846099968	1630700032	2175000064	22	22	22	72.4	72.4	72.4	47.074	0	323.31	23828000000	238
O60684;O15131;Q5TFJ7	Importin subunit alpha-7;Importin subunit alpha-6	KPNA6;KPNA5	610030016	642969984	641320000	639200000	584569984	756880000	720529984	564830016	550630016	577360000	562790016	549310016	582969984	14	14	8	37.9	37.9	28.4	60.029	0	207.33	8250900000	126
O60701	UDP-glucose 6-dehydrogenase	UGDH	0	0	0	58044000	62615000	52105000	0	55325000	40766000	0	43433000	51174000	53800000	3	3	3	6.5	6.5	6.5	55.023	0.00052521	4.3578	468420000	24
O60739	Eukaryotic translation initiation factor 1b	EIF1B	0	0	0	0	0	0	0	0	55980000	0	0	0	0	7	3	3	75.2	40.7	40.7	12.823	0	55.654	390440000	10
O60749	Sorting nexin-2	SNX2	809270016	814240000	871680000	993009984	887960000	912480000	807950016	740830016	807430016	817430016	720920000	760860032	864540032	20	18	18	43.7	39.7	39.7	58.47	0	104.75	11242000000	178
O60763	General vesicular transport factor p115	USO1	753150016	736600000	632320000	728670016	933689984	728750016	742430016	705900032	708320000	740649984	791800000	733390016	703529984	25	25	25	38.7	38.7	38.7	107.89	0	143.69	9999200000	158
O60784;B0QY01	Target of Myb protein 1	TOM1	692830016	604060032	526070016	535310016	620270016	731089984	615660032	552579968	534660000	375710016	553800000	575350016	721030016	18	18	18	47	47	47	53.818	0	100.28	8148400000	147
U3KQK0;Q99880;Q99879;Q99877;Q93079;Q5QNW6;P62807;P58876;P57053;O60814	Histone H2B;Histone H2B type 1-L;Histone H2B type 1-M;Histone H2B type 1-N;Histone H2B type 1-H;Histone H2B type 2-F;Histone H2B type 1-C/E/F/G/I;Histone H2B type 1-D;Histone H2B type F-S;Histone H2B type 1-K	HIST1H2BN;HIST1H2BL;HIST1H2BM;HIST1H2BH;HIST2H2BF;HIST1H2BC;HIST1H2BD;H2BFS;HIST1H2BK	2629100032	2190599936	1474599936	1546099968	2219300096	2286200064	2406899968	2007900032	2565799936	803150016	0	1747500032	1750800000	4	2	2	20.5	6	6	18.804	0.00051586	4.0015	25546000000	29
O60825	6-phosphofructo-2-kinase/fructose-2,6-bisphosphatase 2;6-phosphofructo-2-kinase;Fructose-2,6-bisphosphatase	PFKFB2	2176100096	1566000000	1714499968	1951800064	1993500032	1661100032	1252499968	2950500096	2444400128	2113299968	2255800064	1613699968	2330299904	28	28	28	58.2	58.2	58.2	58.476	0	323.31	26807000000	270
O60826	Coiled-coil domain-containing protein 22	CCDC22	153580000	153960000	131540000	139430000	164960000	169310000	144860000	107530000	122050000	163140000	141290000	132410000	147890000	17	17	17	39.1	39.1	39.1	70.755	0	75.845	1938600000	73
O60831;A6NP52;A6NM71	PRA1 family protein 2	PRAF2	226120000	244760000	0	124780000	0	0	116050000	199030000	156260000	91813000	0	0	0	2	2	2	16.3	16.3	16.3	19.258	0	13.578	1503900000	30
O60861	Growth arrest-specific protein 7	GAS7	287500000	255410000	233650000	250080000	184160000	261150000	236060000	242730000	193030000	116930000	206320000	245450000	219920000	10	10	10	25.4	25.4	25.4	54.371	0	107.6	2958900000	77
O60869	Endothelial differentiation-related factor 1	EDF1	42680000	0	0	55430000	31048000	0	0	0	60377000	0	0	74729000	0	3	3	3	23	23	23	16.368	0.00027315	5.2605	379410000	18
O60883	Prosaposin receptor GPR37L1	GPR37L1	556670016	464510016	625329984	473470016	430300000	409600000	657409984	408460000	610849984	563849984	586320000	432609984	415340000	8	8	8	24.3	24.3	24.3	52.77	0	106.67	6909500000	62
O60884	DnaJ homolog subfamily A member 2	DNAJA2	1016200000	990409984	959830016	1112499968	1054000000	872140032	1234000000	1091399936	1247900032	633139968	1420700032	1469500032	1015500032	17	17	17	58.3	58.3	58.3	45.745	0	149.23	15195000000	147
O60888;C9IZG4	Protein CutA	CUTA	786289984	814150016	832550016	755000000	872809984	635030016	791150016	1215900032	1268899968	645800000	1277600000	1130800000	1007200000	5	5	5	48.6	48.6	48.6	19.116	0	104.36	12985000000	100
O60890	Oligophrenin-1	OPHN1	52018000	39634000	0	0	0	0	0	56086000	0	61523000	0	58558000	0	7	7	7	10.5	10.5	10.5	91.64	0	7.9169	371100000	26
O60939	Sodium channel subunit beta-2	SCN2B	0	9728800	0	0	0	0	0	0	0	0	0	0	0	2	2	2	12.1	12.1	12.1	24.326	0.00053135	4.584	51862000	3
O75038;B9DI82	1-phosphatidylinositol 4,5-bisphosphate phosphodiesterase eta-2;Phosphoinositide phospholipase C	PLCH2	0	0	0	48137000	0	0	59461000	0	0	0	55751000	0	0	7	7	5	6.6	6.6	5.4	154.67	0	8.0996	454390000	25
O75051	Plexin-A2	PLXNA2	0	0	21229000	0	0	0	0	0	0	0	0	0	0	7	2	2	4	1.2	1.2	211.1	0.0012228	3.2218	57604000	5
O75052	Carboxyl-terminal PDZ ligand of neuronal nitric oxide synthase protein	NOS1AP	37697000	0	0	0	0	0	0	0	0	0	0	0	0	5	5	5	10.1	10.1	10.1	56.149	0.00050839	3.7494	338580000	10
O75061;S4R305	Putative tyrosine-protein phosphatase auxilin	DNAJC6	394860000	490649984	344140000	449569984	357630016	433160000	427980000	402440000	163750000	322670016	281150016	407500000	330540000	16	16	16	24.8	24.8	24.8	99.995	0	73.869	4925700000	102
O75064	DENN domain-containing protein 4B	DENND4B	0	0	0	0	0	0	0	16119000	0	0	0	0	0	3	3	3	3.3	3.3	3.3	163.84	0.00052826	4.4457	64471000	6
O75083;D6RD66	WD repeat-containing protein 1	WDR1	13370999808	13541999616	15214000128	15468999680	13582000128	15724000256	14654999552	12513999872	14183999488	18055000064	13086999552	12755999744	14926999552	33	33	33	73.6	73.6	73.6	66.193	0	323.31	188580000000	704
O75116;E9PF63;Q14DU5	Rho-associated protein kinase 2	ROCK2	408350016	378630016	389270016	362009984	372790016	366489984	405329984	423000000	302470016	337280000	391540000	392830016	373340000	31	31	25	27.5	27.5	23	160.9	0	109.05	5128400000	125
O75131;A0A087WYQ3	Copine-3	CPNE3	1443800064	1153699968	1654200064	1511200000	1603800064	1727900032	1688300032	2148999936	2138599936	1585699968	1759299968	1713400064	1949299968	23	22	22	47.3	47.3	47.3	60.13	0	228.89	23100000000	223
O75145;R4GN36	Liprin-alpha-3	PPFIA3	265920000	227880000	263800000	290660000	239900000	242110000	252500000	147600000	104340000	0	0	176870000	0	19	17	17	19.8	18	18	133.49	0	56.394	2549100000	74
O75146	Huntingtin-interacting protein 1-related protein	HIP1R	439150016	337630016	306369984	311980000	260620000	421369984	434350016	466300000	320350016	314100000	252290000	285409984	343320000	21	21	20	26	26	24.7	119.39	0	208.13	4673100000	95
O75155	Cullin-associated NEDD8-dissociated protein 2	CAND2	86380000	122680000	49341000	0	72300000	0	68762000	71557000	0	0	90258000	127010000	107640000	11	8	8	11.7	9.4	9.4	135.25	0	27.955	958830000	49
O75170	Serine/threonine-protein phosphatase 6 regulatory subunit 2	PPP6R2	103960000	85978000	90075000	98148000	111320000	0	116540000	85166000	0	0	0	0	96208000	15	15	15	23.6	23.6	23.6	104.94	0	69.244	978920000	55
O75190;E9PH18;A0A0J9YX62;C9J2C4;C9JDR7;C9JDX6;F8WCZ4;C9J2P2	DnaJ homolog subfamily B member 6	DNAJB6	289900000	259790000	367750016	349369984	666659968	336910016	255190000	599209984	446929984	345049984	314929984	382729984	1086300032	7	6	5	33.4	30.4	25.8	36.087	0	47.068	5920500000	57
O75208;H3BSJ5;H3BNT2;H3BRC0	Ubiquinone biosynthesis protein COQ9, mitochondrial	COQ9	296000000	184930000	210550000	185910000	166800000	238150000	201200000	165380000	218540000	187770000	201080000	219330000	219930000	7	7	7	35.8	35.8	35.8	35.509	0	95.128	2816800000	69
O75223;M0QZK8;B8ZZK2	Gamma-glutamylcyclotransferase	GGCT	514720000	412760000	413380000	459129984	411100000	491220000	373720000	506449984	547800000	527209984	583569984	437249984	561489984	8	8	8	55.3	55.3	55.3	21.007	0	62.69	6373600000	76
O75251;F5H5N1;F5GXJ1	NADH dehydrogenase [ubiquinone] iron-sulfur protein 7, mitochondrial	NDUFS7	284640000	377049984	343969984	353140000	217430000	329689984	384110016	315350016	393560000	225690000	366990016	315329984	301150016	5	5	5	28.2	28.2	28.2	23.563	0	55.519	4472300000	40
O75306	NADH dehydrogenase [ubiquinone] iron-sulfur protein 2, mitochondrial	NDUFS2	3563599872	2755699968	2546099968	2437100032	2410899968	2427699968	2592699904	2705299968	2754299904	2278899968	3231200000	3021299968	2366700032	22	22	22	58.3	58.3	58.3	52.545	0	323.31	36682000000	353
O75319	RNA/RNP complex-1-interacting phosphatase	DUSP11	0	0	0	0	0	0	0	0	0	0	0	0	229790000	1	1	1	3.2	3.2	3.2	43.71	0.0077365	2.093	1991400000	16
O75323;H7C333;C9K068	Protein NipSnap homolog 2	GBAS	1745600000	1608899968	1596899968	1597100032	1485400064	2224600064	1385900032	1903500032	1838099968	1574700032	2448399872	2190700032	2092700032	14	14	14	61.5	61.5	61.5	33.742	0	253.37	26734000000	165
O75340;A0A024QZ42	Programmed cell death protein 6	PDCD6	1603800064	1434400000	1449799936	1342300032	1391500032	1602400000	1266700032	1357799936	1437400064	1332499968	1350200064	1375800064	1307399936	11	11	11	68.1	68.1	68.1	21.868	0	237.58	18735000000	169
O75348	V-type proton ATPase subunit G 1	ATP6V1G1	861169984	849729984	835990016	692089984	655430016	815729984	722689984	532590016	727160000	590860032	715830016	606339968	716499968	6	6	5	63.6	63.6	50.8	13.757	0	141.77	9735700000	57
O75351	Vacuolar protein sorting-associated protein 4B	VPS4B	142890000	113480000	120400000	156250000	0	119100000	0	138050000	0	112350000	0	0	0	10	7	7	28.8	22.7	22.7	49.301	0	23.89	1504000000	34
O75367;B4DJC3	Core histone macro-H2A.1;Histone H2A	H2AFY	220380000	239540000	188440000	187840000	206940000	323889984	281769984	297220000	324220000	346720000	207080000	202680000	194960000	10	10	8	36.6	36.6	29.6	39.617	0	44.94	3263500000	70
O75368	SH3 domain-binding glutamic acid-rich-like protein	SH3BGRL	2235399936	2416699904	2381100032	2006599936	2505799936	2260900096	1931699968	2579099904	2650099968	2134800000	1932099968	1977299968	2502000128	10	10	10	85.1	85.1	85.1	12.774	0	181.23	30319000000	165
O75369;E7EN95	Filamin-B	FLNB	0	175200000	206430000	504750016	274880000	563100032	199980000	443840000	527540000	765800000	770710016	971059968	642289984	52	43	43	27.9	24.8	24.8	278.16	0	133.29	6193300000	153
O75380;D6RBT3	NADH dehydrogenase [ubiquinone] iron-sulfur protein 6, mitochondrial	NDUFS6	1030300032	1063100032	800760000	643310016	719379968	753489984	728200000	645209984	563420032	418140000	668700032	721100032	594870016	7	7	7	61.3	61.3	61.3	13.711	0	169.96	9904600000	86
O75381	Peroxisomal membrane protein PEX14	PEX14	0	45967000	0	0	0	0	0	0	32283000	0	0	37026000	0	3	3	3	9.3	9.3	9.3	41.236	0.0005237	4.257	274590000	17
O75382;A0A1W2PPI7	Tripartite motif-containing protein 3	TRIM3	382780000	399200000	393569984	376590016	341929984	388080000	496710016	317280000	318200000	395320000	356440000	397880000	375449984	16	14	14	30.2	27.4	27.4	80.829	0	109.68	5146500000	94
O75396	Vesicle-trafficking protein SEC22b	SEC22B	0	191160000	0	220000000	0	208500000	182130000	164040000	215350000	139230000	182880000	0	0	7	7	7	42.8	42.8	42.8	24.593	0	38.827	1903500000	26
O75410;E7EVI4;E7ET87;B4E3H6;H0YBT8;H0YAY0	Transforming acidic coiled-coil-containing protein 1	TACC1	0	23287000	0	0	0	0	0	0	0	0	0	0	0	4	4	3	5.6	5.6	4.2	87.793	0	7.6904	124520000	12
O75431;C9JNK6;C9JAZ1	Metaxin-2	MTX2	821539968	937340032	793190016	792550016	759270016	781560000	918230016	1036400000	1026700032	0	1109400064	1013699968	750030016	11	11	11	70.7	70.7	70.7	29.763	0	323.31	12062000000	126
O75436;S4R3Q6	Vacuolar protein sorting-associated protein 26A	VPS26A	437260000	420840000	319820000	420849984	403720000	395150016	407849984	463480000	386870016	457340000	417510016	441060000	395049984	14	12	12	50.5	48.3	48.3	38.169	0	73.551	5494700000	93
O75439;G3V0E4	Mitochondrial-processing peptidase subunit beta	PMPCB	0	181440000	0	0	158460000	0	0	0	234560000	0	0	143370000	304409984	11	10	10	33.5	32.1	32.1	54.366	0	44.641	1620500000	35
O75475	PC4 and SFRS1-interacting protein	PSIP1	667929984	726430016	549219968	549219968	618659968	503460000	570649984	530780000	514830016	389849984	584129984	601160000	494649984	14	13	13	29.1	27.5	27.5	60.103	0	59.614	7584800000	93
O75477;B0QZ43	Erlin-1	ERLIN1	0	0	0	29989000	0	0	0	0	0	0	0	0	0	5	3	3	14.7	7.8	7.8	38.925	0.0034522	2.4753	77175000	4
O75489	NADH dehydrogenase [ubiquinone] iron-sulfur protein 3, mitochondrial	NDUFS3	3712900096	3298899968	3326200064	2667399936	3001600000	3476999936	3127800064	2899599872	3060400128	2939899904	3659599872	3572100096	2920100096	17	17	17	57.2	57.2	57.2	30.241	0	202.54	43600000000	319
Q5JRI1;O75494	Serine/arginine-rich splicing factor 10	SRSF10	0	0	0	0	0	181680000	0	0	0	0	0	0	0	7	7	7	36	36	36	20.913	0	15.712	834680000	29
O75508;B4DFI2	Claudin-11;Claudin	CLDN11	277800000	282340000	1049800000	214920000	178510000	227650000	492030016	128650000	188400000	601950016	372900000	188770000	148570000	3	3	3	22.2	22.2	22.2	21.993	0	9.994	4247200000	41
O75525	KH domain-containing, RNA-binding, signal transduction-associated protein 3	KHDRBS3	0	0	0	0	0	0	0	0	0	0	124520000	0	0	5	4	4	14.5	11.8	11.8	38.799	0.00051733	4.0487	500330000	7
O75531	Barrier-to-autointegration factor;Barrier-to-autointegration factor, N-terminally processed	BANF1	89649000	109120000	0	0	85414000	0	0	0	104980000	107400000	90177000	114680000	103450000	3	3	3	48.3	48.3	48.3	10.058	0	9.0674	1261000000	36
O75533	Splicing factor 3B subunit 1	SF3B1	176330000	348849984	76248000	64476000	266740000	87885000	182630000	462150016	539089984	199390000	420460000	330089984	302910016	26	26	26	30.6	30.6	30.6	145.83	0	84.451	3724400000	111
O75534;E9PLT0	Cold shock domain-containing protein E1	CSDE1	489270016	479430016	510620000	491270016	422670016	479820000	474540000	465720000	429320000	497009984	330470016	420880000	404320000	20	20	20	30.5	30.5	30.5	88.884	0	156.07	5942400000	124
O75569;G5E9Q4	Interferon-inducible double-stranded RNA-dependent protein kinase activator A	PRKRA	496480000	475600000	524769984	402060000	389289984	491649984	382480000	515649984	461110016	0	585699968	419030016	557680000	12	12	12	54	54	54	34.404	0	39.896	6270000000	93
O75582	Ribosomal protein S6 kinase alpha-5	RPS6KA5	0	0	0	0	0	0	0	46059000	0	0	0	0	0	4	4	4	5.1	5.1	5.1	89.864	0.00051046	3.8023	241270000	12
O75600;H7BZ75	2-amino-3-ketobutyrate coenzyme A ligase, mitochondrial	GCAT	133260000	0	0	0	0	0	0	0	0	0	0	0	0	4	4	4	13.1	13.1	13.1	45.285	0	13.098	227780000	11
O75607	Nucleoplasmin-3	NPM3	0	0	0	0	0	0	0	0	0	0	0	0	0	1	1	1	9	9	9	19.343	0	9.329	0	2
O75643	U5 small nuclear ribonucleoprotein 200 kDa helicase	SNRNP200	650609984	548540032	417070016	467740000	563539968	380100000	450270016	501520000	498480000	484820000	509390016	556240000	340420000	37	37	37	24.2	24.2	24.2	244.5	0	284.67	6684200000	206
O75663	TIP41-like protein	TIPRL	275550016	181690000	215100000	212290000	267270000	0	258230000	0	184870000	201160000	210060000	198800000	226530000	12	12	12	58.8	58.8	58.8	31.444	0	32.834	2677800000	61
O75688;C9JIR6;A0A3B3IS24;B8ZZF0	Protein phosphatase 1B	PPM1B	283849984	276630016	202800000	204310000	252370000	183620000	251700000	258820000	230730000	208570000	217090000	202170000	274910016	13	11	11	36.1	31.5	31.5	52.642	0	310.77	3082800000	66
O75694;E9PF10	Nuclear pore complex protein Nup155	NUP155	76655000	77387000	73574000	79954000	84876000	80591000	64616000	56612000	65458000	0	71004000	73161000	60871000	7	7	7	6.8	6.8	6.8	155.2	0	16.603	919040000	36
O75695	Protein XRP2	RP2	0	124520000	153080000	131420000	156250000	0	165120000	124180000	130680000	0	94301000	133320000	215830000	6	6	6	18	18	18	39.641	0	10.472	1625100000	49
O75746	Calcium-binding mitochondrial carrier protein Aralar1	SLC25A12	5824500224	4616399872	4262400000	4714899968	2851300096	4623600128	4238299904	4255300096	4120699904	5578800128	4961200128	4763700224	3883399936	36	36	29	63.7	63.7	55.8	74.761	0	270.47	61025000000	519
O75781;A0A087WTK8	Paralemmin-1	PALM	1921799936	1907399936	1732600064	2270899968	2107800064	2271200000	2013900032	1699600000	2012000000	1036499968	1628199936	1317600000	2073400064	14	14	14	40.3	40.3	40.3	42.075	0	323.31	25454000000	180
O75821;K7ENA8;K7EL20;K7EP16;K7ER90	Eukaryotic translation initiation factor 3 subunit G	EIF3G	293940000	280720000	304249984	323000000	291080000	317790016	259240000	337280000	331520000	182840000	312840000	337729984	292420000	8	8	8	23.4	23.4	23.4	35.611	0	38.92	4106900000	59
O75822	Eukaryotic translation initiation factor 3 subunit J	EIF3J	0	207480000	113210000	133230000	200490000	0	0	289809984	248290000	0	181750000	176010000	205650000	10	10	10	42.2	42.2	42.2	29.062	0	48.813	2102500000	54
O75828	Carbonyl reductase [NADPH] 3	CBR3	1347600000	1434300032	1632499968	1952000000	1863500032	1651299968	1313799936	1863299968	1995800064	2360300032	1812499968	1677100032	1972000000	12	10	10	53.8	43.3	43.3	30.85	0	66.331	22928000000	94
O75832;B1AJY7;B1AJY5	26S proteasome non-ATPase regulatory subunit 10	PSMD10	276960000	346160000	362780000	337409984	294100000	420289984	314000000	586240000	538320000	454780000	431009984	423950016	456860000	9	9	9	50.4	50.4	50.4	24.428	0	80.913	5297400000	91
O75844	CAAX prenyl protease 1 homolog	ZMPSTE24	13715000	0	0	0	0	0	0	0	0	0	0	0	0	1	1	1	3.4	3.4	3.4	54.812	0	7.8012	13715000	2
O75874	Isocitrate dehydrogenase [NADP] cytoplasmic	IDH1	2279899904	2433100032	2676400128	3359899904	2646599936	2603899904	2522599936	3476300032	2656999936	2727399936	2860499968	2628400128	2947699968	19	18	18	54.1	51.9	51.9	46.659	0	150.94	37180000000	310
O75884	Putative hydrolase RBBP9	RBBP9	327329984	523160000	520420000	510580000	436840000	426990016	448289984	622110016	744899968	126500000	540320000	475980000	755089984	9	9	9	73.7	73.7	73.7	21	0	89.96	6967800000	113
O75886	Signal transducing adapter molecule 2	STAM2	0	0	0	0	0	0	0	0	86694000	0	50935000	0	71175000	7	5	5	19.2	15.6	15.6	58.164	0	12.634	672560000	17
O75891	Cytosolic 10-formyltetrahydrofolate dehydrogenase	ALDH1L1	5620400128	5316599808	11260000256	6693899776	6070499840	11464999936	6752600064	7577099776	5671399936	5578399744	7024000000	5831600128	6551199744	51	51	46	70.5	70.5	67.1	98.828	0	323.31	95708000000	684
O75915;F8WF90;C9JQU6;F8WF33	PRA1 family protein 3	ARL6IP5	272100000	246320000	0	272169984	214840000	252990000	231380000	229860000	196220000	194310000	200710000	0	0	3	3	3	20.7	20.7	20.7	21.614	0	61.7	2761700000	53
O75934	Pre-mRNA-splicing factor SPF27	BCAS2	0	0	0	0	0	0	0	66484000	0	0	0	0	0	3	3	3	28.4	28.4	28.4	26.131	0	65.964	402250000	13
O75935;X6RCK5;X6RLR1;X6RA56;A0A0A0MRV8	Dynactin subunit 3	DCTN3	365380000	508049984	406630016	431230016	418280000	554769984	0	521710016	477710016	419809984	448500000	414830016	408510016	8	8	8	49.5	49.5	49.5	21.119	0	137.98	5568500000	45
O75936	Gamma-butyrobetaine dioxygenase	BBOX1	707500032	709299968	1315699968	1062600000	624380032	924809984	754640000	1178899968	1381900032	1195399936	768259968	818640000	1103399936	15	15	15	51.7	51.7	51.7	44.714	0	114.64	12676000000	151
O75937	DnaJ homolog subfamily C member 8	DNAJC8	77465000	106160000	51942000	0	82456000	42564000	0	0	111090000	0	0	119960000	0	6	6	6	28.9	28.9	28.9	29.841	0	54.645	966790000	27
O75947	ATP synthase subunit d, mitochondrial	ATP5H	5929699840	4817099776	5736300032	4069499904	4671200256	5923800064	4892299776	4834699776	5044599808	3797100032	5205499904	5420700160	4719900160	14	14	14	78.9	78.9	78.9	18.491	0	211.31	70978000000	345
O75955;A0A140T9R1;A2AB12;A2AB10	Flotillin-1	FLOT1	1480099968	1127699968	1451500032	1155000064	1276499968	1093400064	1401400064	1030200000	900070016	1172199936	1100600064	920569984	1053699968	25	25	25	69.8	69.8	69.8	47.355	0	172.12	15578000000	220
O75962;E7EWP2;E7EPJ7;F5H228	Triple functional domain protein	TRIO	0	140510000	105620000	109070000	116640000	163960000	117970000	111080000	96098000	0	140490000	146130000	135500000	14	14	11	5.5	5.5	4.6	346.9	0	23.538	1494200000	58
O75995	SAM and SH3 domain-containing protein 3	SASH3	0	0	44960000	0	0	0	0	0	0	0	0	0	0	2	2	2	10	10	10	41.595	0.00074981	3.5111	96812000	2
O76003	Glutaredoxin-3	GLRX3	215410000	287960000	309870016	296689984	360030016	0	370000000	302000000	233090000	212270000	324860000	333080000	289540000	12	12	12	44.8	44.8	44.8	37.432	0	71.381	3876600000	70
O76024	Wolframin	WFS1	0	0	69085000	62322000	0	175190000	61487000	0	0	0	0	0	0	3	3	3	3.6	3.6	3.6	100.29	0.00053163	4.5891	505480000	15
O76038	Secretagogin	SCGN	3851099904	3667200000	3350599936	2386299904	2879699968	4321699840	3581700096	2769100032	3511300096	2042800000	3520199936	3942099968	2547599872	21	21	21	74.3	74.3	74.3	32.039	0	239.79	46396000000	346
O76041	Nebulette	NEBL	493940000	572979968	431270016	1118000000	507120000	800760000	348870016	917740032	872280000	348180000	485600000	608800000	601619968	7	7	7	8.3	8.3	8.3	116.45	0	97.685	8913800000	88
O76054;B3KRD8;C9JZI9	SEC14-like protein 2	SEC14L2	2197600000	2090899968	2600800000	2373700096	1880700032	2684000000	2571599872	2673999872	2324499968	2721799936	2686200064	2145400064	2381400064	21	21	11	60.5	60.5	35.5	46.145	0	229.78	33259000000	288
O76070	Gamma-synuclein	SNCG	3146500096	3184000000	1903200000	2840600064	2551399936	2336999936	2352199936	1466899968	1449699968	2184000000	1636999936	1363100032	2058099968	11	11	11	81.9	81.9	81.9	13.331	0	323.31	29571000000	179
O76071	Probable cytosolic iron-sulfur protein assembly protein CIAO1	CIAO1	107040000	113540000	112750000	77946000	0	0	142710000	0	0	0	153280000	100120000	0	7	7	7	37.2	37.2	37.2	37.84	0	42.241	1045300000	30
O76094;D6RDY6;R4GNC1	Signal recognition particle subunit SRP72	SRP72	232340000	225050000	224760000	194560000	212200000	219080000	230200000	133780000	198890000	213300000	174960000	171710000	122970000	11	11	11	20.4	20.4	20.4	74.605	0	46.306	2625000000	64
O94760;B4DYP1	N(G),N(G)-dimethylarginine dimethylaminohydrolase 1	DDAH1	32413999104	31751999488	36886999040	39408001024	31587999744	39502000128	31089999872	39288999936	42486001664	34439000064	39194001408	37175001088	40928002048	24	24	23	85.3	85.3	82.5	31.121	0	323.31	548410000000	978
O94772	Lymphocyte antigen 6H	LY6H	159900000	273840000	285280000	243740000	189720000	250080000	295320000	66269000	119160000	107030000	137880000	149520000	147990000	3	3	3	28.6	28.6	28.6	14.669	0	56.755	2815000000	47
O94805	Actin-like protein 6B	ACTL6B	141260000	167190000	138370000	155020000	137750000	126760000	0	147570000	91025000	0	113560000	110520000	113160000	8	8	6	29.3	29.3	24.2	46.877	0	154.83	1579200000	52
O94811	Tubulin polymerization-promoting protein	TPPP	7989899776	8221300224	6591099904	5695900160	6477100032	6717799936	6483500032	6038600192	4560000000	6154800128	5799000064	5631099904	5087399936	10	10	10	44.3	44.3	44.3	23.693	0	323.31	84232000000	177
O94819	Kelch repeat and BTB domain-containing protein 11	KBTBD11	5683299840	6977600000	6743600128	6648900096	6338500096	6792300032	6482599936	6564199936	7278199808	6945900032	6344900096	6553099776	7335000064	32	32	32	70.9	70.9	70.9	65.719	0	323.31	90973000000	582
O94826	Mitochondrial import receptor subunit TOM70	TOMM70A	1768000000	1615299968	1867200000	2045699968	1017600000	2168800000	1818800000	1269799936	1542599936	1727699968	1908000000	1393299968	1523600000	24	24	24	59.4	59.4	59.4	67.454	0	323.31	22517000000	235
O94830	Phospholipase DDHD2	DDHD2	101950000	102370000	79772000	93023000	129320000	128410000	120520000	134690000	132280000	121720000	122910000	133530000	116720000	8	8	8	14.6	14.6	14.6	81.031	0	23.08	1576600000	71
O94856;X6RKN2	Neurofascin	NFASC	6540700160	7047799808	5826999808	5422400000	5532400128	4653100032	6712900096	4542600192	5207399936	5415199744	5409200128	5267800064	5100800000	41	41	5	36	36	5	150.02	0	323.31	76822000000	524
O94874	E3 UFM1-protein ligase 1	UFL1	552620032	518030016	564080000	596230016	491980000	548860032	600489984	547910016	563680000	544849984	679209984	515640000	332929984	22	22	22	33	33	33	89.594	0	71.422	7481400000	157
O94875	Sorbin and SH3 domain-containing protein 2	SORBS2	197160000	349030016	0	0	262610000	0	0	0	0	227740000	0	193490000	173880000	8	7	2	8.9	7.9	1.7	124.11	0	11.509	2028200000	32
O94888;C9JAT7	UBX domain-containing protein 7	UBXN7	0	63300000	0	0	0	0	0	0	0	69034000	0	0	0	3	3	3	7.6	7.6	7.6	54.862	0.00029351	6.972	464170000	21
O94903;E5RFX7;E5RG77	Proline synthase co-transcribed bacterial homolog protein	PROSC	914430016	815889984	911870016	1104400000	880360000	1138099968	880680000	930510016	967590016	831939968	891580032	921660032	1058200000	12	12	12	49.5	49.5	49.5	30.344	0	27.089	12858000000	106
O94905;E5RHW4	Erlin-2	ERLIN2	2421900032	1891200000	2399800064	2025699968	2230000128	2377900032	2442599936	1524800000	2131500032	1586000000	2316600064	1941100032	2130800000	20	20	18	77	77	73.5	37.839	0	136.55	28597000000	178
O94906	Pre-mRNA-processing factor 6	PRPF6	0	0	0	0	0	0	0	122520000	0	0	0	48423000	0	8	8	8	9.5	9.5	9.5	106.92	0	10.54	1323500000	20
O94910	Latrophilin-1	LPHN1	101020000	98189000	96221000	91429000	108880000	0	94207000	0	0	0	0	0	110850000	9	9	9	8.6	8.6	8.6	162.71	0	24.458	1106700000	40
O94919	Endonuclease domain-containing 1 protein	ENDOD1	364470016	376480000	466860000	491870016	354129984	429809984	383180000	496320000	481400000	368460000	545080000	360369984	464350016	13	13	13	43.6	43.6	43.6	55.016	0	135.16	5647300000	97
O94925	Glutaminase kidney isoform, mitochondrial	GLS	4879399936	3633299968	3198000128	2987899904	3173600000	4042700032	4554899968	2568000000	2940699904	3354400000	3141100032	3744000000	3432800000	33	33	28	54	54	45.1	73.46	0	323.31	48354000000	428
O94973;A0A0G2JS82;A0A0G2JQM1	AP-2 complex subunit alpha-2	AP2A2	4025600000	4404400128	4172300032	4014500096	3979000064	4123599872	4434100224	4077600000	3306200064	2987300096	4187699968	4449999872	3528399872	42	32	32	62	50.3	50.3	103.96	0	323.31	54392000000	457
O94985;Q5SR54	Calsyntenin-1;Soluble Alc-alpha;CTF1-alpha	CLSTN1	0	67520000	54351000	58138000	87809000	0	0	53188000	96029000	0	81687000	98630000	88604000	4	4	4	5.6	5.6	5.6	109.79	0	29.532	849720000	32
O95057;K7EN06	GTP-binding protein Di-Ras1	DIRAS1	0	0	0	0	0	0	0	0	0	0	127470000	0	75967000	7	7	7	46	46	46	22.329	0	7.4727	544550000	15
O95139;A0A087WZX2	NADH dehydrogenase [ubiquinone] 1 beta subcomplex subunit 6	NDUFB6	0	0	0	49832000	0	0	0	0	0	0	0	0	0	2	2	2	24.2	24.2	24.2	15.489	0.00050826	3.7489	106450000	7
O95140	Mitofusin-2	MFN2	306040000	280740000	288880000	289020000	278860000	261210000	295160000	201280000	247870000	192690000	285430016	286929984	311910016	20	20	19	30.8	30.8	29.9	86.401	0	43.176	3714400000	109
O95154	Aflatoxin B1 aldehyde reductase member 3	AKR7A3	0	0	188310000	210790000	203140000	0	153270000	153800000	167830000	0	180330000	163610000	203900000	8	7	5	31.1	27.8	24.2	37.206	0	11.872	2115800000	30
O95163;F5H2T0	Elongator complex protein 1	IKBKAP	0	64823000	0	73852000	75046000	77733000	57449000	0	0	0	0	73088000	77293000	9	9	9	8.1	8.1	8.1	150.25	0	12.568	790800000	32
S4R3I5;Q6FGG4;O95167	NADH dehydrogenase [ubiquinone] 1 alpha subcomplex subunit 3	NDUFA3	0	0	0	0	0	0	0	0	0	0	63117000	0	0	2	2	2	85.4	85.4	85.4	4.6462	0.0034459	2.4484	546100000	6
O95168;F2Z3P9;C9JXQ9	NADH dehydrogenase [ubiquinone] 1 beta subcomplex subunit 4	NDUFB4	417340000	430560000	477110016	295529984	288620000	405440000	437760000	391320000	371390016	292380000	430420000	420609984	327630016	5	5	5	41.1	41.1	41.1	15.208	0	40.296	5355100000	70
O95169;E9PQ68;K9J7I2	NADH dehydrogenase [ubiquinone] 1 beta subcomplex subunit 8, mitochondrial	NDUFB8	339590016	268470016	278180000	262340000	160850000	282340000	244540000	329729984	385360000	162600000	320320000	339880000	220360000	6	6	6	38.7	38.7	38.7	21.766	0	28.343	3805600000	45
O95182;M0R0N0	NADH dehydrogenase [ubiquinone] 1 alpha subcomplex subunit 7	NDUFA7	496060000	554540032	422569984	482220000	310609984	360060000	472550016	278390016	314430016	0	478070016	411089984	304769984	11	11	11	64.6	64.6	64.6	12.551	0	52.128	5212100000	64
O95197	Reticulon-3	RTN3	2161900032	1967600000	2009600000	2396800000	2096800000	1799500032	1997299968	1197600000	1374599936	1319600000	1605699968	1500899968	1631600000	8	8	7	11.9	11.9	8.1	112.61	0	110.77	23827000000	110
O95202	LETM1 and EF-hand domain-containing protein 1, mitochondrial	LETM1	1139600000	696040000	858809984	716710016	510400000	971740032	754009984	786680000	932190016	1071100032	964360000	874540032	676120000	21	21	21	43	43	43	83.353	0	218.75	11090000000	150
O95218	Zinc finger Ran-binding domain-containing protein 2	ZRANB2	0	0	0	0	0	0	0	0	0	0	0	0	67598000	3	3	3	8.5	8.5	8.5	37.404	0.0051954	2.2984	120320000	4
O95219;F8W9T3	Sorting nexin-4	SNX4	195300000	194070000	206530000	179400000	180600000	223590000	261470000	190240000	189140000	157050000	198730000	186030000	151560000	11	11	11	31.3	31.3	31.3	51.908	0	53.043	2568100000	58
O95248	Myotubularin-related protein 5	SBF1	150320000	137030000	104270000	140980000	130260000	108110000	166740000	0	72595000	125200000	203900000	148190000	0	16	16	15	12.4	12.4	11.9	208.44	0	48.046	1508100000	64
O95260;B4DK25;B4E107;F5GXE4;H0Y5C2	Arginyl-tRNA--protein transferase 1	ATE1	0	0	0	0	0	0	0	0	0	0	0	0	4211900	3	3	3	9.7	9.7	9.7	59.09	0.00099133	3.404	68173000	5
O95278;H0Y6I8	Laforin	EPM2A	349620000	292249984	317750016	375070016	300369984	350529984	783779968	411480000	351049984	460140000	315729984	503080000	499000000	11	11	11	53.5	53.5	53.5	37.157	0	165.31	5578600000	80
O95292	Vesicle-associated membrane protein-associated protein B/C	VAPB	595470016	620400000	592979968	693320000	487440000	536380000	679070016	489790016	709070016	389150016	582520000	504489984	840460032	9	8	8	46.9	42	42	27.228	0	17.492	8030300000	80
O95294	RasGAP-activating-like protein 1	RASAL1	0	0	0	0	0	0	0	0	0	0	0	0	0	2	2	2	3	3	3	90.015	0.0012112	3.0756	0	2
O95295	SNARE-associated protein Snapin	SNAPIN	0	0	0	0	0	0	0	0	100200000	0	0	0	0	3	3	3	29.4	29.4	29.4	14.874	0	12.996	273790000	8
O95298;E9PM14;A0A087WUM3;E9PQ53	NADH dehydrogenase [ubiquinone] 1 subunit C2;NADH dehydrogenase [ubiquinone] 1 subunit C2, isoform 2	NDUFC2;KCTD14;NDUFC2-KCTD14	0	264490000	0	0	0	0	0	0	0	215640000	0	0	0	5	5	5	37.8	37.8	37.8	14.187	0	8.7844	1137200000	22
O95336;M0R261;M0R1L2;M0R0U3	6-phosphogluconolactonase	PGLS	3318700032	2890200064	3192800000	3509799936	3400900096	3244600064	2754800128	4374099968	3790799872	4078400000	3633200128	3407899904	4013100032	14	14	14	87.6	87.6	87.6	27.547	0	323.31	48658000000	358
O95340	Bifunctional 3-phosphoadenosine 5-phosphosulfate synthase 2;Sulfate adenylyltransferase;Adenylyl-sulfate kinase	PAPSS2	0	0	0	0	0	0	0	0	0	0	21435000	0	0	2	1	1	4.4	2.1	2.1	69.5	0.0077417	2.0994	49992000	3
O95352	Ubiquitin-like modifier-activating enzyme ATG7	ATG7	553720000	575230016	555160000	655729984	545590016	564270016	566120000	607529984	554409984	728849984	563809984	611409984	563200000	24	24	24	47.5	47.5	47.5	77.959	0	110.02	7778400000	151
O95372;Q5QPQ0;Q5QPN9;Q5QPQ1;Q5QPQ3;Q5QPQ2	Acyl-protein thioesterase 2	LYPLA2	254910000	348320000	270540000	346080000	299449984	200170000	395150016	342700000	280000000	0	431649984	506200000	442590016	6	6	6	41.1	41.1	41.1	24.737	0	101.16	4482600000	39
O95373	Importin-7	IPO7	1231900032	1163399936	1117799936	1236300032	1383200000	1207399936	1267800064	1197900032	1234499968	1199800064	1248099968	1263600000	1168400000	29	29	29	37.5	37.5	37.5	119.52	0	238.3	16599000000	315
O95394;J3KN95;A0A087WT27	Phosphoacetylglucosamine mutase	PGM3	1082099968	979209984	1197299968	1120800000	1151200000	1114800000	969640000	1103699968	1057900032	1495699968	1134099968	1028200000	1080700032	21	21	21	56.8	56.8	56.8	59.851	0	153.11	14747000000	176
O95396	Adenylyltransferase and sulfurtransferase MOCS3;Molybdopterin-synthase adenylyltransferase;Molybdopterin-synthase sulfurtransferase	MOCS3	0	0	41374000	0	0	0	0	0	0	0	0	0	0	3	3	3	9.6	9.6	9.6	49.669	0	12.246	239280000	10
O95433;G3V438	Activator of 90 kDa heat shock protein ATPase homolog 1	AHSA1	8096300032	6903900160	7900000256	9831999488	8906099712	10611999744	9510899712	8072099840	7415399936	6950400000	8008099840	7364800000	8828600320	14	14	14	48.2	48.2	48.2	38.274	0	113.62	116100000000	104
O95456;F8WBH7	Proteasome assembly chaperone 1	PSMG1	52110000	44263000	38211000	43037000	43435000	0	0	0	50710000	38972000	36345000	0	41488000	3	3	3	13.9	13.9	13.9	32.854	0	9.9078	482890000	27
O95470;H0Y3V8;H7BXL7	Sphingosine-1-phosphate lyase 1	SGPL1	0	0	0	0	0	0	0	0	35179000	0	0	0	0	3	3	3	6.5	6.5	6.5	63.523	0.0012168	3.159	50090000	3
O95486	Protein transport protein Sec24A	SEC24A	0	0	27840000	0	0	0	53509000	27291000	0	0	79616000	0	0	6	4	4	5.4	4.6	4.6	119.75	0	17.378	272160000	22
O95487	Protein transport protein Sec24B	SEC24B	137690000	110570000	153900000	136180000	178660000	102850000	146000000	162060000	198710000	76817000	162580000	107350000	139820000	10	10	8	10.1	10.1	9.4	137.42	0	100.93	1988000000	77
Q5R3B4;O95563	Mitochondrial pyruvate carrier 2	MPC2	239070000	239280000	306800000	205950000	150270000	285489984	260270000	362600000	424390016	238760000	349369984	285390016	300720000	8	8	8	73.3	73.3	73.3	11.681	0	14.377	3964600000	72
O95571;M0QXB5	Persulfide dioxygenase ETHE1, mitochondrial	ETHE1	254030000	370510016	379049984	396169984	314860000	336340000	286580000	284760000	331660000	301710016	315740000	0	331550016	8	8	8	49.2	49.2	49.2	27.873	0	70.915	4143400000	70
O95573	Long-chain-fatty-acid--CoA ligase 3	ACSL3	264560000	250510000	255430000	307100000	0	311609984	226320000	284420000	253190000	0	309129984	247500000	256280000	15	15	13	26.4	26.4	22.4	80.419	0	21.909	3266300000	64
O95613	Pericentrin	PCNT	0	0	0	0	0	0	0	0	0	0	189450000	173580000	0	2	2	2	1	1	1	378.03	0.0018797	2.7343	984130000	10
O95630;C9JK83	STAM-binding protein	STAMBP	0	110790000	106770000	0	105330000	138170000	125850000	0	102370000	0	93631000	96691000	110350000	7	7	7	18.4	18.4	18.4	48.076	0	8.4253	1195500000	29
O95670;H0Y474	V-type proton ATPase subunit G 2	ATP6V1G2	213620000	414369984	302100000	344249984	253010000	275889984	308000000	172680000	286529984	0	266620000	206330000	235100000	6	5	5	57.6	44.9	44.9	13.604	0	72.545	4088800000	59
O95671	N-acetylserotonin O-methyltransferase-like protein	ASMTL	660049984	1049800000	1292600064	1103800064	964899968	613470016	588200000	837139968	1253500032	953110016	66188000	998049984	732950016	24	24	24	57	57	57	68.856	0	247.5	11252000000	181
O95674	Phosphatidate cytidylyltransferase 2	CDS2	0	81939000	185670000	192410000	127470000	133340000	160560000	193280000	156170000	0	167130000	96149000	121330000	5	5	5	17.1	17.1	17.1	51.417	0	66.169	1825100000	38
O95716	Ras-related protein Rab-3D	RAB3D	0	0	662499968	0	711560000	0	0	0	0	0	832000000	756460032	757870016	5	2	2	27.9	11.9	11.9	24.267	0	12.162	14733000000	45
O95721;C9JAF7	Synaptosomal-associated protein 29;Synaptosomal-associated protein	SNAP29	0	103010000	0	91843000	118730000	186080000	0	147320000	143670000	0	92527000	0	170840000	6	6	6	29.1	29.1	29.1	28.97	0	8.0929	1210200000	34
O95741	Copine-6	CPNE6	19783999488	20804999168	15742000128	15352999936	17361000448	19613999104	17368000512	14497000448	14657999872	16442000384	12154999808	14830999552	14524999680	40	40	27	82.4	82.4	59.2	61.99	0	323.31	217680000000	784
O95747;C9JIG9	Serine/threonine-protein kinase OSR1	OXSR1	530980000	451740000	477889984	536160000	512110016	584750016	438540000	485590016	397520000	501080000	537800000	418260000	441529984	17	17	12	44.4	44.4	35.1	58.022	0	47.871	6488600000	108
O95749;A0A2R8YE82;C9J6G3;C9J7M1	Geranylgeranyl pyrophosphate synthase	GGPS1	0	0	0	90391000	0	0	80187000	94242000	85046000	98155000	0	0	79610000	5	5	5	17.3	17.3	17.3	34.87	0.00027226	5.2009	629640000	24
O95757;E9PDE8;D6RJ96	Heat shock 70 kDa protein 4L	HSPA4L	2009600000	2032800000	1775200000	1917100032	2126499968	2146099968	2130300032	2011299968	1715299968	1837400064	1961900032	2112099968	2082400000	36	32	32	57.3	51	51	94.511	0	199.33	27232000000	290
O95782	AP-2 complex subunit alpha-1	AP2A1	6815099904	7673500160	6726900224	6624699904	6421700096	6136600064	7476199936	6296099840	6074399744	6560900096	7250200064	7548700160	6052299776	47	47	37	61.7	61.7	50.5	107.54	0	323.31	91733000000	606
O95786;A2A376	Probable ATP-dependent RNA helicase DDX58	DDX58	0	0	135730000	0	83866000	73637000	0	0	91248000	0	86161000	70077000	0	13	13	13	18.7	18.7	18.7	106.6	0	19.776	692040000	34
O95810	Serum deprivation-response protein	SDPR	215890000	184050000	117140000	281729984	298540000	144250000	205510000	189320000	209630000	263690000	228070000	217410000	200250000	11	11	11	31.5	31.5	31.5	47.173	0	60.477	2806600000	54
O95816	BAG family molecular chaperone regulator 2	BAG2	0	0	0	0	0	0	0	70916000	0	89007000	0	0	0	2	2	2	9	9	9	23.772	0.00029369	6.98	710230000	16
O95817;C9JFK9	BAG family molecular chaperone regulator 3	BAG3	288790016	350040000	112120000	405190016	293140000	411960000	192450000	259840000	170640000	290049984	184340000	257730000	403369984	17	17	17	47.5	47.5	47.5	61.594	0	50.831	3699500000	78
O95822	Malonyl-CoA decarboxylase, mitochondrial	MLYCD	67176000	74948000	0	81293000	0	78708000	67870000	0	0	0	0	0	0	7	7	7	20.1	20.1	20.1	55.003	0	27.11	564230000	26
O95825;A6NND8;A6NHJ8;A6NMA8;C9JAL0;H7C3I5	Quinone oxidoreductase-like protein 1	CRYZL1	123290000	144200000	0	160220000	122080000	0	125850000	140200000	142530000	112380000	140720000	126490000	0	7	7	7	35.8	35.8	35.8	38.696	0	52.871	1575300000	37
O95831	Apoptosis-inducing factor 1, mitochondrial	AIFM1	1039800000	943230016	964030016	944649984	843710016	1060800000	860979968	761699968	982579968	1116499968	1088300032	903779968	860889984	18	18	18	46.2	46.2	46.2	66.9	0	114.53	12876000000	165
O95834;K7EIK7;A0A0C4DGQ7;C9JRL6;K7EII6	Echinoderm microtubule-associated protein-like 2	EML2	156820000	188730000	192620000	183860000	165040000	0	173820000	127630000	122930000	200030000	96223000	113270000	131500000	10	10	9	20.5	20.5	19.3	70.678	0	31.558	1844200000	53
O95837	Guanine nucleotide-binding protein subunit alpha-14	GNA14	0	0	0	0	0	0	0	0	0	0	0	469649984	0	8	1	1	23.7	3.7	3.7	41.57	0.0018939	2.8079	1276200000	3
O95847;Q5VTS8	Mitochondrial uncoupling protein 4	SLC25A27	0	51701000	0	0	0	0	0	82854000	0	0	0	0	0	6	6	6	27.6	27.6	27.6	36.064	0	20.283	430260000	16
O95848	Uridine diphosphate glucose pyrophosphatase	NUDT14	0	0	0	109460000	0	0	0	72701000	0	0	104820000	142660000	94927000	6	6	6	41	41	41	24.118	0	9.7975	797680000	17
O95861;A6NF51	3(2),5-bisphosphate nucleotidase 1	BPNT1	888990016	804950016	855449984	950899968	1008099968	910520000	868329984	953510016	986440000	747870016	908630016	939459968	1005299968	15	15	15	67.5	67.5	67.5	33.392	0	101.77	12104000000	150
O95865;A0A140T971;Q5SSV3;Q5SRR8	N(G),N(G)-dimethylarginine dimethylaminohydrolase 2	DDAH2	2665799936	2477400064	2242400000	2699500032	2715699968	2355000064	2808199936	2545900032	2534099968	2647500032	2281200128	2389100032	2839399936	16	15	15	81.8	78.9	78.9	29.644	0	323.31	35556000000	232
O95881	Thioredoxin domain-containing protein 12	TXNDC12	120370000	0	0	90084000	106890000	89205000	82921000	87426000	74296000	0	0	0	105390000	4	4	4	27.3	27.3	27.3	19.206	0.00027345	5.2687	1016800000	28
O95926	Pre-mRNA-splicing factor SYF2	SYF2	0	0	0	0	0	19800000	0	0	0	0	0	0	0	1	1	1	11.5	11.5	11.5	28.722	0	29.435	49885000	3
O95989	Diphosphoinositol polyphosphate phosphohydrolase 1	NUDT3	816480000	737710016	848000000	788889984	782860032	873689984	786550016	787169984	673120000	727270016	840280000	828640000	878590016	6	6	1	39.5	39.5	8.1	19.471	0	54.481	10558000000	77
O95990;C9JAU5	Protein FAM107A	FAM107A	0	0	0	0	0	0	0	0	91735000	0	0	0	0	4	4	4	30.6	30.6	30.6	17.455	0.00098232	3.2832	194350000	5
O96000;H3BPJ9;H3BV16	NADH dehydrogenase [ubiquinone] 1 beta subcomplex subunit 10	NDUFB10	1740700032	1647399936	1545799936	1740899968	1348400000	1764000000	1474000000	1364300032	1275399936	1562800000	1560300032	1547299968	1228600064	10	10	10	51.7	51.7	51.7	20.776	0	45.138	20633000000	101
O96007	Molybdopterin synthase catalytic subunit	MOCS2	0	0	108990000	122710000	89131000	0	0	0	0	0	0	0	0	4	4	4	30.9	30.9	30.9	20.944	0	7.6056	785400000	19
O96008;K7EKG4	Mitochondrial import receptor subunit TOM40 homolog	TOMM40	317020000	227420000	228010000	297100000	192740000	226810000	287740000	226790000	237090000	150740000	212290000	246570000	180640000	6	6	6	28	28	28	37.893	0	128.64	3249500000	56
O96011	Peroxisomal membrane protein 11B	PEX11B	0	0	0	0	0	0	0	0	0	0	36306000	0	0	3	3	3	13.5	13.5	13.5	28.431	0.0012213	3.2065	201840000	9
O96019	Actin-like protein 6A	ACTL6A	0	0	121570000	123380000	0	0	71992000	0	0	0	0	0	0	5	3	3	21.7	16.6	16.6	47.46	0	22.691	535090000	11
O96033;E9PKT9	Molybdopterin synthase sulfur carrier subunit	MOCS2	0	0	0	0	0	0	0	0	0	0	0	0	16082000	2	2	2	25	25	25	9.7552	0.00099108	3.4035	97872000	10
P00167	Cytochrome b5	CYB5A	352169984	315460000	376600000	511009984	336369984	444249984	290020000	241000000	280980000	205610000	279670016	0	257520000	5	5	5	49.3	49.3	49.3	15.33	0	15.205	4004600000	51
P00325;D6RHZ6;V9HW50;P07327	Alcohol dehydrogenase 1B;Alcohol dehydrogenase 1A	ADH1B;HEL-S-117;ADH1A	0	166960000	339230016	205860000	152360000	276900000	226110000	183190000	0	0	181360000	0	112840000	8	8	8	32.5	32.5	32.5	39.854	0	23.831	2051800000	45
P00338;F5GXY2	L-lactate dehydrogenase A chain	LDHA	34296000512	34500001792	33837000704	37652000768	25873000448	27424000000	28867999744	29721999360	23356000256	31462000640	29632000000	26827999232	28426999808	26	26	25	80.1	80.1	76.5	36.688	0	323.31	406060000000	686
P00352	Retinal dehydrogenase 1	ALDH1A1	6777099776	6804299776	8689000448	11212000256	9026199552	11040000000	7974600192	9798700032	8278400000	9676099584	8403999744	8285499904	6230199808	35	31	31	79.8	76.2	76.2	54.861	0	323.31	116310000000	651
P00367;P49448	Glutamate dehydrogenase 1, mitochondrial;Glutamate dehydrogenase 2, mitochondrial	GLUD1;GLUD2	53821001728	43094999040	62023999488	51197001728	53395001344	52953001984	47856001024	59854000128	49466998784	43991998464	64379998208	56255000576	57031000064	36	36	36	67.9	67.9	67.9	61.397	0	323.31	779760000000	1573
P00387;B1AHF3	NADH-cytochrome b5 reductase 3;NADH-cytochrome b5 reductase 3 membrane-bound form;NADH-cytochrome b5 reductase 3 soluble form	CYB5R3	2137100032	1757699968	2783699968	2374799872	1713900032	2378099968	2311500032	2573100032	2852199936	2772499968	2492400128	2150400000	2818800128	21	21	21	69.4	69.4	69.4	34.234	0	323.31	33451000000	240
P00390	Glutathione reductase, mitochondrial	GSR	2964100096	2677799936	2618500096	2776900096	2675000064	2864300032	2769100032	2563300096	2864600064	2788300032	3128199936	2977799936	2362700032	22	22	22	62.6	62.6	62.6	56.256	0	323.31	41480000000	363
P00395	Cytochrome c oxidase subunit 1	MT-CO1	0	0	0	0	0	0	0	0	0	0	191570000	0	0	3	3	3	10.3	10.3	10.3	57.041	0	21.011	466480000	10
P00403	Cytochrome c oxidase subunit 2	MT-CO2	4097100032	2115500032	2891500032	3009999872	624220032	2810500096	2124400000	2540300032	3047300096	1682899968	3264900096	2773100032	2288300032	9	9	9	44.9	44.9	44.9	25.565	0	233.72	40677000000	160
P00414	Cytochrome c oxidase subunit 3	MT-CO3	245350000	0	0	159450000	53494000	0	0	205250000	277710016	142450000	0	350830016	0	1	1	1	5.4	5.4	5.4	29.95	0.00050697	3.7083	1415200000	14
P00441;H7BYH4	Superoxide dismutase [Cu-Zn]	SOD1	31181000704	31252000768	33707999232	31366000640	28443000832	31353999360	28967999488	13312000000	17522999296	13976000512	15324000256	15480000512	18800001024	6	6	6	60.4	60.4	60.4	15.936	0	323.31	321870000000	339
P00450;E9PFZ2;H7C5R1	Ceruloplasmin	CP	467769984	500420000	311700000	537859968	2427800064	557769984	288740000	224570000	265330000	955950016	669310016	131580000	502460000	24	24	20	31.8	31.8	28.9	122.2	0	129.86	7604100000	143
P00488	Coagulation factor XIII A chain	F13A1	315940000	366390016	475300000	1818400000	746080000	0	450790016	566000000	0	856489984	620680000	264840000	567289984	20	20	20	34.3	34.3	34.3	83.266	0	40.407	6893500000	90
P00491;G3V5M2	Purine nucleoside phosphorylase	PNP	2081799936	1944700032	1974000000	2321799936	2856600064	1947000064	2208600064	3307399936	3694000128	2073100032	2758799872	3109799936	3531200000	21	21	21	84.1	84.1	84.1	32.118	0	323.31	36025000000	312
P00492	Hypoxanthine-guanine phosphoribosyltransferase	HPRT1	3670000128	3893400064	3442299904	3396699904	3388300032	2945799936	3480900096	2708100096	2355800064	2328300032	3057400064	3211099904	3572800000	13	13	12	79.4	79.4	76.1	24.579	0	323.31	44282000000	276
P00505	Aspartate aminotransferase, mitochondrial	GOT2	21981999104	20272001024	19005999104	17153999872	16618999808	19310999552	17422000128	16005999616	15735000064	14373999616	18736001024	19506999296	17792000000	30	30	30	70.9	70.9	70.9	47.517	0	323.31	245870000000	764
P00533;E9PFD7;Q504U8	Epidermal growth factor receptor;Receptor protein-tyrosine kinase	EGFR	116250000	145750000	134510000	0	113140000	128320000	232640000	221910000	216080000	134500000	166190000	159840000	173350000	18	18	18	18.6	18.6	18.6	134.28	0	64.436	2027900000	69
P00558	Phosphoglycerate kinase 1	PGK1	55437000704	49080999936	47566999552	51578998784	41445998592	47860998144	40819998720	43419000832	36774998016	37754998784	41992998912	37688000512	39004000256	34	34	28	81.3	81.3	67.4	44.614	0	323.31	630240000000	1301
Q5T9B7;P00568	Adenylate kinase isoenzyme 1	AK1	14407999488	11948000256	11646000128	12606000128	12227999744	16088999936	12309000192	20529000448	22001999872	15952000000	16106999808	15358999552	19828000768	15	15	14	62.4	62.4	58.1	23.411	0	323.31	222810000000	440
P00734;E9PIT3	Prothrombin;Activation peptide fragment 1;Activation peptide fragment 2;Thrombin light chain;Thrombin heavy chain	F2	76142000	0	0	0	0	0	0	0	0	0	0	0	0	6	6	6	13.5	13.5	13.5	70.036	0.00053291	4.6528	242420000	10
P00738;J3QR68;H0Y300;A0A0C4DGL8;J3QLC9;A0A087WU08;P00739	Haptoglobin;Haptoglobin alpha chain;Haptoglobin beta chain;Haptoglobin-related protein	HP;HPR	0	4478400000	779350016	299689984	5921800192	2058200064	4966700032	2961799936	2665999872	10561000448	7494799872	1357699968	4616999936	26	26	19	54.7	54.7	46.8	45.205	0	246.57	48097000000	234
P00846	ATP synthase subunit a	MT-ATP6	0	0	0	0	0	0	0	0	0	0	0	0	174560000	1	1	1	4.4	4.4	4.4	24.817	0	8.0254	2222900000	3
P00915;E5RHP7;E5RH81;E5RIF9;E5RG43;E5RFE7;E5RFL2	Carbonic anhydrase 1	CA1	4113999872	4133100032	4777900032	3070200064	8232000000	5932499968	2711399936	1788800000	2180699904	2736699904	6641099776	6110799872	4905999872	13	13	13	73.9	73.9	73.9	28.87	0	323.31	65384000000	349
P00918	Carbonic anhydrase 2	CA2	8664599552	12341999616	11233999872	11537999872	14133999616	11797000192	11571000320	11781999616	14188999680	13831000064	15768000512	12679000064	11875000320	17	17	17	68.8	68.8	68.8	29.246	0	323.31	165570000000	353
P00966;Q5T6L6;Q5T6L5	Argininosuccinate synthase	ASS1	1364400000	1671800064	2005400064	2557100032	2045400064	1941900032	2155000064	2766099968	2121400064	2555099904	2431699968	1980700032	2289900032	20	20	20	49.3	49.3	49.3	46.53	0	179.15	28848000000	244
P01008	Antithrombin-III	SERPINC1	196470000	212770000	194070000	0	389720000	145380000	131230000	99228000	162920000	177920000	492950016	113820000	232450000	14	14	14	39.9	39.9	39.9	52.602	0	46.419	2748300000	71
P01009	Alpha-1-antitrypsin;Short peptide from AAT	SERPINA1	7604599808	8709900288	8625399808	5030099968	16817999872	3932000000	6698699776	7150300160	4473600000	10762999808	10424999936	4091200000	9456000000	31	31	2	66	66	5.7	46.736	0	323.31	107170000000	461
P01011;G3V3A0;G3V595	Alpha-1-antichymotrypsin;Alpha-1-antichymotrypsin His-Pro-less	SERPINA3	1118700032	1196400000	2194899968	921520000	1423299968	470300000	1025600000	914249984	259030000	2157900032	2110499968	457430016	1317600000	16	16	16	47.8	47.8	47.8	47.65	0	212.17	16120000000	134
P01019	Angiotensinogen;Angiotensin-1;Angiotensin-2;Angiotensin-3;Angiotensin-4;Angiotensin 1-9;Angiotensin 1-7;Angiotensin 1-5;Angiotensin 1-4	AGT	649670016	486260000	655030016	487940000	967849984	688659968	545129984	486380000	559190016	603160000	640009984	574540032	537590016	8	8	8	24.3	24.3	24.3	53.154	0	117.13	8474400000	98
P01023	Alpha-2-macroglobulin	A2M	2755500032	2946700032	2699399936	2553600000	4937500160	1600400000	1875399936	910630016	2248000000	2812499968	4270500096	1983100032	4072499968	50	50	50	48.5	48.5	48.5	163.29	0	323.31	38276000000	434
P01024	Complement C3;Complement C3 beta chain;C3-beta-c;Complement C3 alpha chain;C3a anaphylatoxin;Acylation stimulating protein;Complement C3b alpha chain;Complement C3c alpha chain fragment 1;Complement C3dg fragment;Complement C3g fragment;Complement C3d fragment;Complement C3f fragment;Complement C3c alpha chain fragment 2	C3	2109900032	2563300096	2253100032	2302400000	3707099904	2097500032	1751600000	1153600000	1747600000	3891899904	2856999936	1440600064	2661100032	58	58	58	45.2	45.2	45.2	187.15	0	323.31	30370000000	479
P01034	Cystatin-C	CST3	300950016	289140000	437120000	352990016	369670016	389940000	330840000	372750016	260640000	261660000	202930000	317720000	0	5	5	5	44.5	44.5	44.5	15.799	0	30.917	4115400000	50
P01040	Cystatin-A;Cystatin-A, N-terminally processed	CSTA	0	0	0	0	0	0	0	0	0	33764000	0	0	0	1	1	1	18.4	18.4	18.4	11.006	0.0012252	3.2525	15186000	2
P01042	Kininogen-1;Kininogen-1 heavy chain;T-kinin;Bradykinin;Lysyl-bradykinin;Kininogen-1 light chain;Low molecular weight growth-promoting factor	KNG1	0	0	0	0	272990016	0	0	0	0	0	0	0	0	4	4	4	9.2	9.2	9.2	71.957	0	15.778	951970000	19
P01111	GTPase NRas	NRAS	945670016	959420032	1112499968	1129600000	887990016	1163200000	1033699968	813070016	859059968	825030016	911289984	735699968	838179968	10	10	2	66.7	66.7	12.7	21.229	0	206.91	12527000000	109
P01112	GTPase HRas;GTPase HRas, N-terminally processed	HRAS	322289984	295780000	362590016	332320000	276889984	321720000	325660000	272220000	272230016	262520000	288569984	203830000	303390016	10	3	2	66.7	19	11.1	21.298	0	11.541	3939600000	37
P01116	GTPase KRas;GTPase KRas, N-terminally processed	KRAS	0	280550016	319040000	344180000	259110000	323209984	308960000	169070000	208280000	292360000	189410000	174820000	0	9	3	3	68.8	21.2	21.2	21.656	0	25.255	3313200000	36
P01185	Vasopressin-neurophysin 2-copeptin;Arg-vasopressin;Neurophysin 2;Copeptin	AVP	95648000	0	0	0	0	0	0	0	0	0	0	0	0	3	3	3	28.7	28.7	28.7	17.325	0	22.015	95648000	2
P01229	Lutropin subunit beta	LHB	29174000	0	0	0	0	0	0	0	0	0	0	0	0	1	1	1	10.6	10.6	10.6	15.345	0.0012195	3.1914	29174000	1
Q5I0G2;P01236;A6XMH3	Prolactin	PRL	525750016	0	0	148160000	0	0	0	0	0	0	0	0	0	7	7	7	43.4	43.4	43.4	25.947	0	18.543	706160000	11
P01721	Ig lambda chain V-VI region AR		0	0	0	0	50010000	0	0	0	0	0	0	0	0	1	1	1	18.8	18.8	18.8	12.566	0.00028506	6.0981	51697000	2
P01780	Ig heavy chain V-III region JON		0	0	0	0	132020000	0	0	0	0	99062000	0	0	0	3	3	2	23.1	23.1	13.7	12.943	0	24.135	1935300000	9
P01834	Ig kappa chain C region	IGKC	1684999936	4878799872	4609800192	3889400064	4524199936	1706700032	3156900096	2176600064	2494899968	4759199744	4546500096	2359899904	4302000128	7	7	7	81.3	81.3	81.3	11.765	0	323.31	48213000000	332
Q5Y7A7;P01912	HLA class II histocompatibility antigen, DRB1-13 beta chain;HLA class II histocompatibility antigen, DRB1-3 chain	HLA-DRB1	0	179650000	352780000	198390000	0	114650000	122770000	0	306049984	132450000	315630016	155940000	0	6	6	1	36.5	36.5	3.8	30.008	0	71.088	2173800000	39
P02042;E9PFT6;E9PEW8	Hemoglobin subunit delta	HBD	3404100096	4263300096	3502500096	1525699968	3065100032	2623800064	2046599936	1282000000	2084300032	1331200000	5392699904	4039099904	3608499968	14	7	7	92.5	59.2	59.2	16.055	0	88.098	44953000000	164
P02452	Collagen alpha-1(I) chain	COL1A1	0	0	377840000	0	0	0	0	0	0	0	0	0	0	5	5	5	4.9	4.9	4.9	138.94	0	32.469	1008700000	13
P02545	Prelamin-A/C;Lamin-A/C	LMNA	10680999936	10051999744	11415000064	12940000256	14398000128	11573000192	9200700416	8014300160	8753999872	10787000320	8723000320	7500599808	8056300032	47	47	3	60.8	60.8	8.6	74.139	0	323.31	137290000000	663
P02549	Spectrin alpha chain, erythrocytic 1	SPTA1	0	0	0	0	0	0	0	0	0	0	128750000	0	116920000	11	11	11	6.3	6.3	6.3	280.01	0	46.116	569070000	18
P02647;F8W696	Apolipoprotein A-I;Proapolipoprotein A-I;Truncated apolipoprotein A-I	APOA1	3341499904	2098899968	920120000	2230299904	7007000064	2774200064	1656800000	516480000	1693799936	1864700032	1802000000	1734300032	3266400000	18	18	18	55.4	55.4	55.4	30.777	0	264.83	32186000000	207
P02649;H0Y7L5;E9PEV4;E7ERP7	Apolipoprotein E	APOE	2295399936	2133200000	2632399872	2399000064	2224900096	2825100032	2084099968	2559699968	4350499840	2476000000	2927500032	2551800064	2768000000	15	15	15	57.7	57.7	57.7	36.154	0	287.48	35482000000	188
P02671	Fibrinogen alpha chain;Fibrinopeptide A;Fibrinogen alpha chain	FGA	1809799936	2886599936	2500999936	3087600128	3084199936	1030000000	3028699904	1715399936	1575100032	2850700032	2206000128	829580032	3144300032	25	25	25	46.4	46.4	46.4	94.972	0	323.31	30658000000	260
P02675;D6REL8	Fibrinogen beta chain;Fibrinopeptide B;Fibrinogen beta chain	FGB	2810599936	4385200128	3270799872	7171800064	5222199808	1449200000	4660499968	1780600064	1873699968	4128499968	3912999936	1664000000	4143200000	26	26	22	65.8	65.8	60.5	55.928	0	323.31	48362000000	354
P02689	Myelin P2 protein	PMP2	0	0	0	0	0	0	194110000	0	171340000	0	198950000	0	181870000	5	4	4	31.1	25.8	25.8	14.909	0.00028662	6.3109	1582400000	24
P02741	C-reactive protein;C-reactive protein(1-205)	CRP	0	0	0	0	0	0	0	0	0	0	92120000	0	0	2	2	2	9.8	9.8	9.8	25.038	0.0051604	2.2468	140830000	4
P02743	Serum amyloid P-component;Serum amyloid P-component(1-203)	APCS	0	96427000	0	0	91870000	0	0	0	135170000	0	146020000	0	0	5	5	5	24.2	24.2	24.2	25.387	0	9.6662	930730000	19
X6RLJ0;P02745	Complement C1q subcomponent subunit A	C1QA	0	0	214770000	0	0	0	0	119250000	0	0	0	0	0	2	2	2	7.7	7.7	7.7	23.351	0.0021107	2.6985	743760000	11
P02747	Complement C1q subcomponent subunit C	C1QC	137180000	184560000	302600000	368609984	228180000	0	249050000	212360000	114240000	366510016	307120000	135570000	0	4	4	4	21.2	21.2	21.2	25.773	0	37.18	2758500000	38
P02748	Complement component C9;Complement component C9a;Complement component C9b	C9	0	0	0	0	0	0	0	0	0	0	0	26681000	0	4	4	2	10.4	10.4	6.6	63.173	0.00051387	3.9242	254610000	7
P02749;J3QRN2;J3QLI0	Beta-2-glycoprotein 1	APOH	188860000	146720000	157460000	101680000	113690000	0	62312000	0	0	152460000	112740000	125970000	118700000	8	8	8	32.8	32.8	32.8	38.298	0	13.799	1384500000	34
P02750	Leucine-rich alpha-2-glycoprotein	LRG1	0	0	0	0	204010000	0	0	0	0	0	0	0	0	5	5	5	24.8	24.8	24.8	38.177	0	16.885	488490000	13
P02751;H0Y7Z1	Fibronectin;Anastellin;Ugl-Y1;Ugl-Y2;Ugl-Y3	FN1	0	50007000	0	419620000	611169984	175480000	0	65340000	251830000	93829000	89748000	0	0	18	18	18	11.3	11.3	11.3	262.62	0	61.3	1842100000	54
P02760;S4R3Y4	Protein AMBP;Alpha-1-microglobulin;Inter-alpha-trypsin inhibitor light chain;Trypstatin	AMBP	207770000	319230016	152360000	0	180330000	0	0	0	0	152220000	0	97610000	0	7	7	7	22.7	22.7	22.7	38.999	0	21.587	1189000000	26
P02763	Alpha-1-acid glycoprotein 1	ORM1	3424800000	2606099968	3026800128	1012200000	4881099776	1199299968	1325900032	2101400064	1023500032	2836800000	3033700096	1396899968	2640699904	9	9	7	41.3	41.3	32.8	23.511	0	159.37	31271000000	174
P02766;A0A087WT59;A0A087WV45	Transthyretin	TTR	875360000	828670016	851500032	1061299968	1183100032	1268099968	946480000	802449984	598880000	1031800000	847929984	956209984	598049984	9	9	9	65.3	65.3	65.3	15.887	0	153.7	11975000000	142
P02786;G3V0E5	Transferrin receptor protein 1;Transferrin receptor protein 1, serum form	TFRC	67671000	0	62112000	79459000	99569000	0	0	46417000	0	0	47524000	0	66261000	9	9	9	13.7	13.7	13.7	84.87	0	9.5921	564520000	30
P02787	Serotransferrin	TF	3964100096	5059800064	4591600128	5709899776	16183000064	4982400000	3978899968	1473200000	3400300032	3047899904	3679699968	4351300096	3801100032	40	40	40	58.2	58.2	58.2	77.063	0	323.31	67900000000	475
P02790	Hemopexin	HPX	1007500032	688160000	321180000	577420032	1401200000	909680000	552249984	318590016	470870016	910569984	628099968	528440000	906030016	15	15	15	50.2	50.2	50.2	51.676	0	88.356	9494300000	142
P02792	Ferritin light chain	FTL	5363400192	4779200000	5365000192	4977900032	4594100224	6445199872	5141499904	5674399744	23882000384	6807399936	4924299776	3538899968	5553999872	9	9	9	54.9	54.9	54.9	20.019	0	208.71	89948000000	322
P02794;G3V192;G3V1D1	Ferritin heavy chain;Ferritin heavy chain, N-terminally processed;Ferritin	FTH1	10286999552	10698000384	11918000128	10529999872	9316200448	12051999744	11194000384	10273999872	14668000256	9483700224	8911599616	6948700160	8694500352	14	14	14	74.9	74.9	74.9	21.225	0	231	141170000000	308
P02808	Statherin	STATH	0	0	0	0	0	0	0	0	0	0	105130000	0	0	1	1	1	54.8	54.8	54.8	7.3044	0	11.892	137720000	2
P03886	NADH-ubiquinone oxidoreductase chain 1	MT-ND1	145780000	70813000	99187000	117780000	0	79405000	0	0	75542000	0	0	0	0	3	3	3	11.6	11.6	11.6	35.66	0.00028193	5.8714	785220000	20
P03891	NADH-ubiquinone oxidoreductase chain 2	MT-ND2	0	0	0	0	0	0	0	0	73879000	0	68797000	0	0	2	2	2	10.4	10.4	10.4	38.96	0.00052083	4.1495	350900000	7
P03905	NADH-ubiquinone oxidoreductase chain 4	MT-ND4	98217000	0	115430000	0	0	0	0	98758000	134070000	0	102330000	93658000	0	4	4	4	12.4	12.4	12.4	51.58	0	8.9332	851220000	30
P03915	NADH-ubiquinone oxidoreductase chain 5	MT-ND5	79266000	0	0	0	0	0	0	0	0	0	0	0	0	3	3	3	8	8	8	67.026	0	17.717	246890000	11
P04003	C4b-binding protein alpha chain	C4BPA	80530000	0	0	0	188520000	0	0	0	0	177050000	0	0	0	5	5	5	10.2	10.2	10.2	67.033	0	56.056	491910000	19
P04004	Vitronectin;Vitronectin V65 subunit;Vitronectin V10 subunit;Somatomedin-B	VTN	0	0	0	0	76717000	0	0	0	0	0	0	0	0	4	4	4	10.7	10.7	10.7	54.305	0.00029283	6.9104	217540000	16
P04040	Catalase	CAT	1808000000	2377600000	2094300032	1835699968	2339599872	2005299968	1868199936	1376499968	1790800000	1988000000	2322099968	1884800000	1980899968	26	26	26	58.4	58.4	58.4	59.755	0	241.87	27406000000	281
P04066	Tissue alpha-L-fucosidase	FUCA1	0	0	0	0	0	15991000	0	0	0	0	0	0	0	1	1	1	2.4	2.4	2.4	53.688	0.0057906	2.167	95419000	7
P04075;J3KPS3;H3BQN4;H3BPS8;H3BUH7;H3BR04	Fructose-bisphosphate aldolase A;Fructose-bisphosphate aldolase	ALDOA	119979999232	118689996800	108419997696	111889997824	101849997312	96451002368	108109996032	112289996800	96170000384	93549002752	108100001792	104860000256	103220002816	36	36	31	87.1	87.1	75	39.42	0	323.31	1499100000000	2325
P04080	Cystatin-B	CSTB	4312300032	4198000128	3782200064	3897999872	4138800128	4183899904	3570200064	3426200064	4128600064	3740699904	3566200064	3186299904	4570999808	5	5	5	77.6	77.6	77.6	11.139	0	134.88	53547000000	215
P04083	Annexin A1	ANXA1	3652900096	5064999936	7150199808	8819399680	4722200064	8627300352	8476400128	5248699904	8819200000	8358499840	5573300224	3585600000	8907599872	27	27	27	73.1	73.1	73.1	38.714	0	323.31	91974000000	388
P04114	Apolipoprotein B-100;Apolipoprotein B-48	APOB	0	0	0	0	0	106140000	0	0	0	83488000	0	0	0	11	11	11	3.7	3.7	3.7	515.6	0	25.96	427740000	22
P04179;F5H4R2;F5GYZ5;F5H3C5;G8JLJ2	Superoxide dismutase [Mn], mitochondrial	SOD2	9479000064	7792600064	12689000448	10348999680	9111100416	12661999616	9524700160	7750400000	10380000256	9095000064	10247999488	9823099904	8777100288	14	14	14	85.1	85.1	85.1	24.75	0	323.31	135020000000	412
P04181	Ornithine aminotransferase, mitochondrial;Ornithine aminotransferase, hepatic form;Ornithine aminotransferase, renal form	OAT	673270016	673139968	530140000	571230016	642480000	800339968	648070016	575660032	741329984	615790016	616920000	805320000	549100032	15	15	15	61	61	61	48.534	0	186.91	8704400000	121
P04196	Histidine-rich glycoprotein	HRG	0	0	0	0	0	0	0	0	0	0	0	22233000	0	2	2	2	4.4	4.4	4.4	59.578	0.00098741	3.3537	190930000	13
P04217;M0R009	Alpha-1B-glycoprotein	A1BG	0	0	125220000	70291000	595680000	0	0	0	0	0	194170000	0	156470000	8	8	8	25.1	25.1	25.1	54.253	0	23.822	1413500000	29
P04271	Protein S100-B	S100B	3120399872	5182199808	3969900032	633710016	3343899904	3256199936	4358300160	8996800512	18589999104	7117100032	14494000128	8997199872	11925000192	4	4	4	44.6	44.6	44.6	10.713	0	323.31	109770000000	164
P04275	von Willebrand factor;von Willebrand antigen 2	VWF	99450000	123500000	0	71336000	145600000	64566000	0	62462000	0	66076000	42793000	64008000	59375000	11	11	11	4.1	4.1	4.1	309.26	0	9.6217	872800000	39
P04350	Tubulin beta-4A chain	TUBB4A	44243001344	43858001920	38071001088	35188998144	44158001152	41237999616	50230001664	31591999488	30004000768	31275999232	35322998784	31470999552	35520000000	31	8	4	77.5	17.3	7.7	49.585	0	323.31	519480000000	339
P04406;E7EUT5	Glyceraldehyde-3-phosphate dehydrogenase	GAPDH	199850000384	198900006912	192840007680	197970001920	149350006784	200330002432	168509997056	216050008064	173530005504	173319995392	187229995008	185360007168	178299994112	26	26	26	84.2	84.2	84.2	36.053	0	323.31	3297300000000	5222
P04424;F8W943	Argininosuccinate lyase	ASL	0	163030000	274540000	229310000	132910000	228200000	186300000	287000000	309350016	206410000	178880000	166880000	168130000	12	12	12	31.9	31.9	31.9	51.657	0	66.955	2680600000	64
P04733	Metallothionein-1F	MT1F	0	0	0	0	0	0	0	0	0	0	0	0	11818000	1	1	1	19.7	19.7	19.7	6.0863	0.0045465	2.3548	170810000	9
P04792;F8WE04	Heat shock protein beta-1	HSPB1	6425500160	9520700416	11866000384	11818999808	10645999616	14458000384	9212999680	10296000512	10218999808	10124000256	8118600192	8851800064	9892500480	21	21	21	87.3	87.3	87.3	22.782	0	323.31	135160000000	484
P04839	Cytochrome b-245 heavy chain	CYBB	0	0	0	0	0	0	0	0	0	24172000	0	0	0	4	4	4	7.9	7.9	7.9	65.335	0.003668	2.4239	284490000	5
P04843;B7Z4L4	Dolichyl-diphosphooligosaccharide--protein glycosyltransferase subunit 1	RPN1	271590016	237470000	167760000	313080000	283049984	225720000	227600000	248250000	287910016	269400000	321520000	213010000	266840000	17	17	17	40.7	40.7	40.7	68.569	0	58.011	3435300000	92
P04844	Dolichyl-diphosphooligosaccharide--protein glycosyltransferase subunit 2	RPN2	266450000	159370000	266080000	295409984	283150016	302729984	334329984	227110000	361270016	305960000	348100000	205560000	257690000	15	15	15	40.7	40.7	40.7	69.283	0	133.24	3724900000	92
P04899	Guanine nucleotide-binding protein G(i) subunit alpha-2	GNAI2	6743799808	7234299904	8051599872	8072200192	7260100096	8137299968	8523899904	5774099968	6818299904	6905200128	6433200128	5273299968	6608699904	20	18	12	63.7	57.2	40.6	40.45	0	323.31	97943000000	500
Q93077;Q7L7L0;P04908	Histone H2A type 1-C;Histone H2A type 3;Histone H2A type 1-B/E	HIST1H2AC;HIST3H2A;HIST1H2AB	0	0	0	0	0	0	0	59050000	0	0	0	0	0	4	1	1	35.4	8.5	8.5	14.105	0.0057997	2.1729	55931000	1
P05023	Sodium/potassium-transporting ATPase subunit alpha-1	ATP1A1	900849984	985209984	1612800000	1266099968	1264999936	986620032	1337500032	1002099968	1189299968	820720000	1119000064	814009984	1130099968	33	18	18	35.8	18.2	18.2	112.89	0	235.02	15215000000	155
P05026	Sodium/potassium-transporting ATPase subunit beta-1	ATP1B1	9805700096	9764800512	9341100032	10577000448	8651400192	8166300160	10218999808	7271300096	7514500096	8188499968	8158900224	7581599744	8030900224	15	15	15	44.2	44.2	44.2	35.061	0	189.09	117860000000	289
P05060;A0A0A0MT66	Secretogranin-1;PE-11;GAWK peptide;CCB peptide	CHGB	147760000	105590000	87111000	0	94977000	115190000	0	0	0	0	81371000	0	0	8	8	8	16.1	16.1	16.1	78.275	0	16.317	900910000	27
P05091	Aldehyde dehydrogenase, mitochondrial	ALDH2	24820000768	19947999232	27147999232	21496999936	18912000000	22441000960	17769000960	19623999488	17995999232	18172000256	18712000512	18303000576	20893999104	38	38	33	73.9	73.9	70.6	56.381	0	323.31	281330000000	809
P05109	Protein S100-A8;Protein S100-A8, N-terminally processed	S100A8	0	0	307609984	0	0	0	294980000	0	0	0	336350016	0	0	2	2	2	23.7	23.7	23.7	10.834	0	8.9893	2030400000	23
P05129	Protein kinase C gamma type	PRKCG	779110016	643630016	522710016	560910016	438409984	549489984	575889984	163320000	299249984	478420000	334150016	499870016	462009984	25	23	23	48.2	42.9	42.9	78.447	0	95.147	6455600000	162
P05141	ADP/ATP translocase 2;ADP/ATP translocase 2, N-terminally processed	SLC25A5	1681500032	1463600000	1705200000	1348499968	1084899968	1539100032	1351500032	1969900032	1472099968	1817799936	1846800000	1510899968	1462800000	14	6	6	40.3	19.5	19.5	32.852	0	37.064	21327000000	118
P05155;H9KV48;E9PGN7	Plasma protease C1 inhibitor	SERPING1	337040000	289020000	434860000	346200000	722000000	196660000	267640000	320700000	199770000	465800000	511760000	184050000	379920000	13	13	13	30.8	30.8	30.8	55.154	0	27.416	4760200000	96
P05161;A0A096LNZ9;A0A096LPJ4	Ubiquitin-like protein ISG15	ISG15	308360000	187160000	659680000	160350000	307100000	206450000	222750000	321409984	332230016	283040000	959470016	188380000	0	7	7	7	41.2	41.2	41.2	17.887	0	82.582	4738400000	49
P05165;A0A1B0GU58;A0A1B0GUX9;A0A1B0GWI4;A0A1B0GWA1	Propionyl-CoA carboxylase alpha chain, mitochondrial	PCCA	815529984	663500032	859030016	723809984	627660032	700080000	732080000	690019968	605360000	787209984	669660032	608129984	622579968	26	26	26	42.6	42.6	42.6	80.058	0	104.07	9309700000	173
P05186	Alkaline phosphatase, tissue-nonspecific isozyme	ALPL	0	0	0	241660000	99557000	0	0	0	0	0	0	0	0	9	9	9	26.3	26.3	26.3	57.304	0	49.499	615380000	22
P05198;G3V4T5;H0YJS4	Eukaryotic translation initiation factor 2 subunit 1	EIF2S1	659950016	571420032	587040000	569880000	539110016	595520000	506760000	507680000	546150016	475960000	569520000	448960000	453270016	17	17	17	57.5	57.5	57.5	36.112	0	268.32	7355100000	125
P05230	Fibroblast growth factor 1	FGF1	278590016	286569984	256780000	315369984	256060000	0	287120000	334809984	434910016	328910016	206190000	355880000	407120000	8	8	8	64.5	64.5	64.5	17.459	0	37.04	3946700000	49
P05362;K7EKL8	Intercellular adhesion molecule 1	ICAM1	0	82271000	114390000	114450000	0	127610000	0	91838000	112240000	115420000	0	0	95308000	6	6	6	12.6	12.6	12.6	57.825	0	8.0297	1078600000	24
P05386	60S acidic ribosomal protein P1	RPLP1	920640000	790240000	944080000	838220032	995390016	938099968	701859968	466420000	801270016	419529984	771649984	1013200000	760419968	4	4	4	79.8	79.8	79.8	11.514	0	323.31	10719000000	69
P05387	60S acidic ribosomal protein P2	RPLP2	827649984	546860032	757889984	849160000	937150016	695790016	643449984	303880000	815420032	611219968	665070016	623310016	749699968	5	5	5	70.4	70.4	70.4	11.665	0	138	9447300000	93
P05388;F8VWS0;F8VW21;F8VU65;F8VPE8;G3V210;F8VQY6;F8VRK7;Q8NHW5;F8VZS0;F8VWV4;F8VS58	60S acidic ribosomal protein P0;60S acidic ribosomal protein P0-like	RPLP0;RPLP0P6	1749299968	1727500032	2136899968	2308499968	2130300032	2137900032	1894200064	1819399936	1880499968	1563100032	1929500032	1731100032	1894300032	12	12	12	45.7	45.7	45.7	34.273	0	82.994	25831000000	159
S4R371;P05413;S4R3A2	Fatty acid-binding protein, heart	FABP3	2314099968	2685499904	1693400064	1758099968	1569500032	1792400000	1772999936	1974200064	1353400064	1995800064	1771299968	1698800000	1581900032	10	10	9	71.2	71.2	65.9	14.787	0	32.762	26355000000	146
P05455	Lupus La protein	SSB	1638599936	1559100032	1708600064	1510099968	1327900032	1723800064	1343500032	1470700032	1391699968	1552199936	1400400000	1481900032	1278400000	29	29	29	58.1	58.1	58.1	46.836	0	189.11	19931000000	246
P05534	HLA class I histocompatibility antigen, A-24 alpha chain	HLA-A	0	0	0	0	0	0	39769000	0	0	0	0	0	0	14	2	1	44.9	7.9	3	40.688	0.00051894	4.0954	136860000	3
P05546	Heparin cofactor 2	SERPIND1	0	0	0	0	41100000	0	0	0	0	0	0	0	0	4	4	4	7.4	7.4	7.4	57.07	0.00050929	3.7752	114500000	8
P05556	Integrin beta-1	ITGB1	257210000	278880000	318000000	330950016	324590016	237240000	307489984	352100000	365969984	245820000	261940000	305820000	321740000	10	10	10	14.7	14.7	14.7	88.414	0	28.402	4086900000	80
P05771	Protein kinase C beta type	PRKCB	374300000	420529984	141630000	262670000	0	157360000	330910016	211460000	0	184560000	181530000	183280000	0	24	14	14	47.1	29.2	29.2	76.868	0	28.605	2722100000	67
P05937;E5RIZ8	Calbindin	CALB1	300710016	260010000	208720000	0	0	0	318529984	149890000	0	331849984	185860000	332600000	295200000	14	13	13	56.7	52.5	52.5	30.025	0	56.144	2616100000	55
P05976;P08590	Myosin light chain 1/3, skeletal muscle isoform;Myosin light chain 3	MYL1;MYL3	0	0	0	0	0	0	0	0	0	0	113040000	0	0	1	1	1	8.2	8.2	8.2	21.145	0	7.5265	374150000	12
P06132;A0A1B0GVZ4;A0A1B0GVN9;H0Y5R6	Uroporphyrinogen decarboxylase	UROD	144300000	127680000	0	200990000	0	0	241490000	163300000	0	0	303480000	163880000	185190000	7	7	7	38.7	38.7	38.7	40.786	0	27.329	1884000000	26
P06241;E5RFS5	Tyrosine-protein kinase Fyn	FYN	227620000	184420000	238420000	141650000	176050000	176440000	223620000	193400000	166300000	177210000	159960000	133030000	204000000	12	7	7	26.1	19	19	60.761	0	70.362	2490900000	63
P06312	Ig kappa chain V-IV region	IGKV4-1	0	0	75092000	0	0	0	0	0	0	0	0	0	0	2	2	2	14.9	14.9	14.9	13.38	0.0025487	2.5634	455740000	14
P06576;H0YH81;F8W079	ATP synthase subunit beta, mitochondrial;ATP synthase subunit beta	ATP5B	75359002624	58894999552	70722002944	50225000448	51081998336	76666003456	62862000128	60266000384	67296002048	58104999936	68167000064	61454000128	55149998080	28	28	19	73.5	73.5	49.7	56.559	0	323.31	957700000000	1724
P06702	Protein S100-A9	S100A9	0	0	0	83404000	0	0	0	0	0	0	0	0	0	4	4	4	49.1	49.1	49.1	13.242	0	31.137	203970000	5
R4GN98;P06703	Protein S100;Protein S100-A6	S100A6	0	0	0	0	0	0	501100000	0	0	0	653670016	670809984	0	3	3	3	37.6	37.6	37.6	9.681	0	39.442	4460200000	17
P06727	Apolipoprotein A-IV	APOA4	0	0	0	0	186330000	0	0	0	0	0	0	113250000	0	5	5	5	15.2	15.2	15.2	45.398	0	8.3855	541490000	11
P06730;D6RBW1;H0Y8J7	Eukaryotic translation initiation factor 4E	EIF4E	280329984	298540000	261720000	281009984	293040000	338150016	261780000	333689984	274649984	393940000	261950000	324400000	284100000	6	6	6	39.2	39.2	39.2	25.097	0	25.345	3992800000	57
P06733;A0A2R8Y6G6	Alpha-enolase	ENO1	97668997120	90926997504	97096998912	110250000384	108300001280	103369998336	100390002688	150780002304	132090003456	133800001536	113800003584	110919999488	118699999232	34	34	30	76.5	76.5	67.5	47.168	0	323.31	1647600000000	3402
P06748	Nucleophosmin	NPM1	3196100096	2760999936	2315399936	2816000000	2975399936	2847099904	2440100096	2424600064	2704800000	2166700032	2834200064	2380300032	2313900032	9	9	9	42.2	42.2	42.2	32.575	0	323.31	36634000000	214
P06753	Tropomyosin alpha-3 chain	TPM3	0	382380000	0	202490000	127330000	0	0	0	78469000	0	76398000	107180000	128840000	18	2	2	47	5.6	5.6	32.95	0.00027042	5.0192	1897900000	19
P06756	Integrin alpha-V;Integrin alpha-V heavy chain;Integrin alpha-V light chain	ITGAV	782529984	664289984	672910016	734110016	851110016	750150016	879360000	762790016	732649984	809280000	900200000	816960000	868070016	30	30	30	35.3	35.3	35.3	116.04	0	98.112	10493000000	168
Q8N257;Q16778;P33778;P23527;P06899;Q6DRA6;Q6DN03	Histone H2B type 3-B;Histone H2B type 2-E;Histone H2B type 1-B;Histone H2B type 1-O;Histone H2B type 1-J;Putative histone H2B type 2-D;Putative histone H2B type 2-C	HIST3H2BB;HIST2H2BE;HIST1H2BB;HIST1H2BO;HIST1H2BJ;HIST2H2BD;HIST2H2BC	8388299776	7411100160	4296699904	5234500096	7908599808	6344099840	8852100096	6633600000	7406600192	2507000064	6483100160	5888999936	6074599936	4	4	2	27	27	7.9	13.908	0	106.76	100030000000	180
P07093	Glia-derived nexin	SERPINE2	148840000	97629000	114720000	99019000	102260000	99030000	88784000	142450000	247660000	0	83906000	267050000	130950000	7	7	7	23.9	23.9	23.9	44.002	0	46.598	1730800000	54
P07099	Epoxide hydrolase 1	EPHX1	1625100032	1196800000	1029000000	1676099968	1034000000	1383399936	1397600000	1365299968	1457500032	1338899968	1274599936	1143000064	1268800000	24	24	24	58.5	58.5	58.5	52.948	0	190.49	17317000000	185
P07101	Tyrosine 3-monooxygenase	TH	291180000	72883000	200080000	149770000	183160000	290569984	154490000	209440000	195570000	79050000	214740000	255360000	164230000	14	14	14	37.7	37.7	37.7	58.599	0	93.541	2564300000	83
P07108;B8ZWD1;A0A0A0MTI5	Acyl-CoA-binding protein	DBI	4363599872	5286600192	4357499904	1878700032	4045799936	3225700096	3250800128	3330800128	4535499776	2638700032	4196100096	3587699968	4770200064	11	11	11	78.2	78.2	78.2	10.044	0	277.09	64438000000	171
P07195;A0A3B3IS95;A8MW50;C9J7H8	L-lactate dehydrogenase B chain;L-lactate dehydrogenase	LDHB	85663997952	75230003200	85032001536	84947001344	77569998848	77035003904	76673998848	85174001664	83063996416	69805998080	84669997056	82809004032	81659002880	24	23	23	68.3	64.7	64.7	36.638	0	323.31	1145100000000	1574
P07196;A0A0S2Z436;A0A087X0W2	Neurofilament light polypeptide	NEFL	15192000512	14339000320	10037999616	10947999744	11980000256	10972999680	21059000320	9999299584	8894100480	15169000448	12869000192	9760199680	12906000384	40	35	35	69.4	65.7	65.7	61.516	0	323.31	168980000000	502
P07237;H7BZ94;H0Y3Z3	Protein disulfide-isomerase	P4HB	3483300096	3327099904	3027300096	3337900032	3531800064	3387899904	3325600000	2262000128	2701600000	3239899904	3227099904	2609400064	2797100032	28	28	28	57.9	57.9	57.9	57.116	0	323.31	41642000000	371
P07305	Histone H1.0;Histone H1.0, N-terminally processed	H1F0	0	37945000	105970000	0	0	0	46689000	0	0	0	65365000	0	59614000	3	3	3	18.6	18.6	18.6	20.863	0.0002686	4.8656	450780000	15
P07311;G3V2U7	Acylphosphatase-1;Acylphosphatase	ACYP1	342900000	410089984	263770000	114500000	88360000	234900000	336430016	346020000	333870016	296720000	407420000	420760000	407140000	6	6	6	67.7	67.7	67.7	11.261	0	18.407	4182700000	59
P07355;H0YN42;H0YMD0;H0YMU9;H0YM50;A6NMY6;H0YKS4;H0YNP5	Annexin A2;Annexin;Putative annexin A2-like protein	ANXA2;ANXA2P2	15498999808	18052999168	18813999104	35865001984	21966999552	19430000640	22765000704	15240999936	25124999168	29119000576	16936999936	15066999808	24849999872	31	31	31	73.5	73.5	73.5	38.604	0	323.31	297730000000	681
P07384	Calpain-1 catalytic subunit	CAPN1	3507300096	3069100032	3300600064	3691599872	3801400064	2916800000	3441499904	3113400064	3632199936	3743200000	3282599936	3214899968	2955699968	39	39	33	56.9	56.9	49.4	81.889	0	323.31	45371000000	490
Q5JP53;P07437;Q5ST81	Tubulin beta chain	TUBB	21287000064	18652999680	17895999488	18976000000	20784001024	17070999552	23032000512	22378000384	20231999488	20860000256	19456000000	20120999936	21980999680	31	5	5	75.4	16.9	16.9	47.766	0	323.31	297560000000	460
P07585;F8VX58;F8VXZ8;F8VUF6;F8VWU0	Decorin	DCN	0	0	0	193810000	0	0	0	0	0	0	0	0	0	4	4	4	17	17	17	39.746	0	8.2496	417310000	10
P07602;C9JIZ6;Q5BJH1	Prosaposin;Saposin-A;Saposin-B-Val;Saposin-B;Saposin-C;Saposin-D	PSAP	1656300032	1938800000	1759000064	1133200000	1834700032	1729600000	1519200000	956209984	1373100032	1071100032	1583399936	1728600064	2016499968	11	11	11	24.8	24.8	24.8	58.112	0	18.162	21364000000	81
P07686;Q5URX0	Beta-hexosaminidase subunit beta;Beta-hexosaminidase subunit beta chain B;Beta-hexosaminidase subunit beta chain A	HEXB	162050000	147120000	144120000	151610000	149520000	0	0	0	135100000	0	131420000	135090000	141170000	7	7	7	16.2	16.2	16.2	63.111	0	13.143	1570700000	42
P07738	Bisphosphoglycerate mutase	BPGM	0	0	145740000	163960000	126480000	182970000	139290000	121240000	129890000	0	192630000	129850000	189380000	7	7	7	37.8	37.8	37.8	30.005	0	83.758	1804400000	41
P07741;H3BQZ9;H3BQB1;H3BQF1	Adenine phosphoribosyltransferase	APRT	548480000	649900032	936620032	671030016	810070016	845920000	779740032	1008600000	1320400000	1095299968	1134700032	799200000	1029100032	11	11	11	71.7	71.7	71.7	19.608	0	190.53	12098000000	126
P07814;V9GYZ6	Bifunctional glutamate/proline--tRNA ligase;Glutamate--tRNA ligase;Proline--tRNA ligase	EPRS	1869699968	1711600000	1898800000	1709100032	1764700032	1844800000	1636800000	1636199936	1448999936	1350300032	1989600000	1619000064	1818899968	52	52	51	48	48	48	170.59	0	323.31	23609000000	342
P07858	Cathepsin B;Cathepsin B light chain;Cathepsin B heavy chain	CTSB	843990016	948470016	1016700032	863729984	996360000	1027100032	714560000	801779968	588529984	776320000	805400000	649720000	743200000	9	9	9	33	33	33	37.821	0	215.65	11008000000	108
P07900	Heat shock protein HSP 90-alpha	HSP90AA1	55501000704	62477000704	45565001728	61915000832	64900001792	68806000640	71290003456	52307001344	50362998784	62171000832	60114001920	55168999424	55898001408	58	58	40	65	65	47.8	84.659	0	323.31	802110000000	2016
P07902;G3V3U5;G3V223;F2Z2X9;G3V4G9	Galactose-1-phosphate uridylyltransferase	GALT	132890000	211770000	120550000	137120000	125120000	135940000	147640000	174030000	169220000	141150000	130440000	124010000	153190000	5	5	5	16.9	16.9	16.9	43.363	0	10.608	1961000000	46
P07919	Cytochrome b-c1 complex subunit 6, mitochondrial	UQCRH	220280000	253680000	0	0	0	0	251590000	0	125870000	0	185580000	0	197040000	2	2	2	29.7	29.7	29.7	10.739	0	23.255	2029200000	25
P07948;H0Y3C5;J3KPD6;F6SF04;P08631	Tyrosine-protein kinase Lyn;Non-specific protein-tyrosine kinase;Tyrosine-protein kinase HCK	LYN;HCK	0	0	87909000	83872000	0	0	0	0	0	0	0	0	0	6	4	4	11.9	9	9	58.573	0.00098668	3.3452	490400000	14
P07954	Fumarate hydratase, mitochondrial	FH	5927900160	4103099904	4493199872	4161600000	3845900032	5111699968	4067599872	3998299904	3931200000	4269700096	4267800064	4503900160	4501899776	25	25	25	62.2	62.2	62.2	54.636	0	323.31	62846000000	361
P08133;E7EMC6	Annexin A6;Annexin	ANXA6	30616000512	26257000448	34466000896	31975999488	30733000704	30936000512	32743000064	24486000640	35827998720	36828999680	33205000192	31337000960	27881000960	53	53	23	72.1	72.1	32.1	75.872	0	323.31	423260000000	1135
Q5JR08;P08134;E9PQH6;Q5JR07;Q5JR05	Rho-related GTP-binding protein RhoC	RHOC	0	0	0	0	0	0	0	0	186090000	0	142970000	0	0	10	2	1	67.6	19.1	6.4	21.523	0	7.7342	1393500000	13
P08238	Heat shock protein HSP 90-beta	HSP90AB1	14323999744	15900000256	12145999872	15797000192	17904001024	20430000128	16963000320	12277000192	11144999936	14167000064	14252999680	13152000000	13822000128	52	34	27	68.6	51.2	44.6	83.263	0	323.31	206120000000	714
P08240	Signal recognition particle receptor subunit alpha	SRPR	0	0	0	0	0	0	0	0	0	0	0	27265000	0	3	3	3	8.2	8.2	8.2	69.81	0.00027071	5.0647	67634000	9
P08243;F8WEJ5	Asparagine synthetase [glutamine-hydrolyzing]	ASNS	0	0	0	0	0	0	0	0	0	0	0	219920000	0	2	2	2	6.2	6.2	6.2	64.369	0.0096049	1.9663	451890000	20
P08247;H7C4W3	Synaptophysin	SYP	1746499968	1796700032	2360800000	1766300032	1950099968	1834300032	1951100032	1475000064	1157299968	1178800000	1855600000	1440899968	2027800064	3	3	3	10.2	10.2	10.2	33.845	0	23.836	26528000000	92
P08294	Extracellular superoxide dismutase [Cu-Zn]	SOD3	189880000	199690000	189030000	210770000	0	184840000	207850000	190950000	198670000	259250000	230090000	192570000	221850000	5	5	5	26.7	26.7	26.7	25.851	0	9.4502	2477400000	50
P08559	Pyruvate dehydrogenase E1 component subunit alpha, somatic form, mitochondrial	PDHA1	3759399936	3710599936	3636600064	3047200000	2707200000	3553400064	3240199936	2963399936	3186400000	2672100096	3610099968	3231600128	3021799936	24	24	24	65.9	65.9	65.9	43.295	0	323.31	44698000000	322
P08567	Pleckstrin	PLEK	0	0	0	75797000	0	0	0	0	0	0	0	0	0	2	2	2	10.9	10.9	10.9	40.124	0.0091924	2	74693000	2
P08571;D6RFL4	Monocyte differentiation antigen CD14;Monocyte differentiation antigen CD14, urinary form;Monocyte differentiation antigen CD14, membrane-bound form	CD14	0	69292000	243140000	585040000	270729984	0	0	105110000	67111000	193880000	167520000	0	0	6	6	6	24.3	24.3	24.3	40.076	0	31.722	1745800000	30
P08572;A0A3B3IS47	Collagen alpha-2(IV) chain;Canstatin	COL4A2	665849984	830440000	614990016	366220000	732369984	451760000	583969984	588870016	644360000	600449984	714310016	576710016	511220000	8	8	8	7.6	7.6	7.6	167.55	0	79.667	8451600000	84
P08574	Cytochrome c1, heme protein, mitochondrial	CYC1	2489299968	1607100032	1874400000	1959500032	887710016	2103000064	1778000000	1287600000	2068899968	1353699968	1944099968	1558200064	1490200064	11	11	11	50.2	50.2	50.2	35.422	0	179.64	23863000000	166
P08579	U2 small nuclear ribonucleoprotein B	SNRPB2	0	0	0	0	0	0	0	0	0	0	338040000	0	0	4	4	2	19.6	19.6	12.9	25.486	0.00029206	6.8252	1058100000	11
P08603	Complement factor H	CFH	0	58901000	79141000	0	124500000	0	76272000	0	0	0	92261000	65370000	80678000	8	8	6	7.3	7.3	5.7	139.09	0	11.316	711310000	32
P08621;M0QYR1	U1 small nuclear ribonucleoprotein 70 kDa	SNRNP70	102590000	88281000	0	59040000	0	0	0	96558000	91521000	81642000	113050000	124850000	95711000	5	5	5	11.9	11.9	11.9	51.556	0	20.043	917660000	25
P08648	Integrin alpha-5;Integrin alpha-5 heavy chain;Integrin alpha-5 light chain	ITGA5	0	0	0	0	23535000	0	0	0	0	0	0	0	0	1	1	1	2.2	2.2	2.2	114.54	0.0016683	2.8668	75284000	4
P08670;B0YJC4	Vimentin	VIM	121079996416	122829996032	150550003712	227830005760	164740005888	189000007680	130049998848	163490004992	158940004352	162449997824	125250002944	126860001280	139179999232	58	56	48	85.2	83.7	74.5	53.651	0	323.31	2158400000000	2672
P08754	Guanine nucleotide-binding protein G(k) subunit alpha	GNAI3	435180000	486140000	687040000	602510016	595340032	518960000	558849984	603840000	675760000	748630016	495300000	504940000	544300032	16	10	10	58.2	39	39	40.532	0	153.86	7581600000	96
P08758;D6RBL5;D6RBE9;E9PHT9	Annexin A5;Annexin	ANXA5	25570000896	32463998976	33322999808	39979999232	38427000832	46519001088	38479998976	41728000000	34920001536	51450998784	32234000384	22345000960	38648999936	28	28	28	78.1	78.1	78.1	35.936	0	323.31	496740000000	884
P09104;F5H0C8	Gamma-enolase;Enolase	ENO2	51703001088	56255000576	44544000000	42632998912	53963001856	48009998336	48945999872	52823998464	42920001536	41920999424	57010999296	51626999808	49912000512	25	21	19	77.6	68.7	61.8	47.268	0	323.31	718390000000	1217
P09110;C9JDE9;H7C131	3-ketoacyl-CoA thiolase, peroxisomal	ACAA1	787280000	825500032	911409984	743960000	744150016	932350016	817299968	801820032	853459968	420920000	792300032	808979968	837720000	15	15	15	58.5	58.5	58.5	44.292	0	306.32	11086000000	170
P09211;A8MX94	Glutathione S-transferase P	GSTP1	20088000512	18609999872	24782999552	24248999936	21856999424	25931999232	18951000064	30097000448	32685000704	27327000576	30740000768	27876999168	28316000256	15	15	15	69.5	69.5	69.5	23.356	0	323.31	356120000000	568
P09382	Galectin-1	LGALS1	8709600256	10560000000	12334000128	8999799808	11198000128	12371000320	12743000064	11143999488	12814999552	9391299584	10707999744	10586000384	13621000192	10	10	10	86.7	86.7	86.7	14.716	0	323.31	154440000000	348
P09417;B7Z415;D6RGG7	Dihydropteridine reductase	QDPR	11319000064	11998999552	10204000256	7020199936	8797299712	9604299776	10517000192	8930499584	7256300032	11937999872	8746200064	7672900096	7975900160	14	14	14	69.7	69.7	69.7	25.789	0	323.31	128270000000	347
P09429;Q5T7C4	High mobility group protein B1	HMGB1	975590016	268050000	276740000	442240000	1837400064	1329100032	0	1582899968	2815300096	1387000064	1411200000	1973699968	1922899968	9	9	7	39.5	39.5	29.8	24.893	0	155.45	17345000000	92
P09455;A0A0A0MQT0;A0A0A0MTB9;H0YAK8	Retinol-binding protein 1	RBP1	1143000064	1354099968	1842300032	960739968	1088499968	1368800000	993120000	1990300032	2186200064	1487500032	1931500032	2412900096	2159699968	14	14	14	80	80	80	15.85	0	212.52	23297000000	186
P09467;A0A3B3IUC7	Fructose-1,6-bisphosphatase 1	FBP1	0	0	0	134890000	0	0	0	0	0	0	94678000	0	0	5	5	5	23.7	23.7	23.7	36.842	0	9.5884	496370000	14
P09471	Guanine nucleotide-binding protein G(o) subunit alpha	GNAO1	37357998080	35496001536	40539000832	34659999744	29873999872	35031998464	39451000832	25460000768	26559000576	23299999744	30946000896	25456001024	31573999616	21	20	19	71.2	68.1	64.7	40.05	0	323.31	455610000000	754
P09486;F5GY03	SPARC	SPARC	0	0	0	0	0	0	0	0	0	91271000	0	0	0	4	4	4	12.5	12.5	12.5	34.632	0.00052549	4.3716	326070000	13
P09488;E7EWW9;B9ZVX7	Glutathione S-transferase Mu 1	GSTM1	5517899776	785660032	613350016	8150400000	728289984	3510799872	851830016	27146999808	9463199744	340590016	705830016	235250000	884019968	23	16	7	85.3	67.4	38.1	25.712	0	237.84	58917000000	142
P09496;F8WF69	Clathrin light chain A	CLTA	1612400000	1234800000	989059968	962680000	985350016	1281500032	1022499968	715950016	617040000	510529984	436809984	780240000	513400000	5	5	5	13.7	13.7	13.7	27.076	0	8.2019	12070000000	48
P09497	Clathrin light chain B	CLTB	1532400000	1786599936	1407100032	1395299968	1868400000	1607600000	1527500032	798289984	955500032	645120000	1164000000	1061800000	1530899968	11	11	11	38	38	38	25.19	0	85.648	18044000000	122
P09525;Q6P452	Annexin A4;Annexin	ANXA4	1252700032	1157500032	1221799936	1584300032	1252899968	1389799936	1112300032	1277600000	1377400064	1479699968	1097100032	1119800064	1317500032	19	19	19	51.4	51.4	51.4	35.882	0	168.43	17183000000	183
P09543	2,3-cyclic-nucleotide 3-phosphodiesterase	CNP	32988000256	32487999488	38427000832	29449000960	30267000832	25890000896	41465999360	26168000512	24728000512	28408000512	37880999936	20032999424	25019000832	35	35	35	69.1	69.1	69.1	47.578	0	323.31	417890000000	710
P09619	Platelet-derived growth factor receptor beta	PDGFRB	731500032	555320000	300070016	698289984	459409984	623600000	0	806830016	0	0	261220000	0	355590016	5	5	4	5.6	5.6	4.4	123.97	0	7.5077	6657400000	27
P09622;E9PEX6	Dihydrolipoyl dehydrogenase, mitochondrial;Dihydrolipoyl dehydrogenase	DLD	6558400000	5000500224	6306500096	5006000128	5091200000	6148199936	5694799872	5086099968	5222700032	5244700160	5018899968	5051100160	5130699776	19	19	19	53.2	53.2	53.2	54.177	0	323.31	77132000000	408
P09661;H0YKK0	U2 small nuclear ribonucleoprotein A	SNRPA1	79365000	76633000	0	0	74713000	0	0	101780000	79787000	81574000	79002000	86139000	87215000	6	6	6	31	31	31	28.415	0	106.98	894150000	34
P09669	Cytochrome c oxidase subunit 6C	COX6C	0	0	0	0	0	0	0	203680000	0	0	0	0	132770000	3	3	3	37.3	37.3	37.3	8.7813	0.00098619	3.3379	1625300000	14
P09874	Poly [ADP-ribose] polymerase 1	PARP1	971100032	887779968	956640000	802089984	749110016	780249984	834680000	879630016	884990016	849230016	776590016	1006200000	646249984	35	35	35	45.7	45.7	45.7	113.08	0	256.95	11419000000	213
P09914	Interferon-induced protein with tetratricopeptide repeats 1	IFIT1	568880000	444280000	2124899968	527950016	419460000	203610000	581550016	1035400000	703180032	355969984	2764199936	472000000	502550016	22	22	21	55	55	51.5	55.36	0	288.6	12140000000	160
P09936;D6RE83;D6R956;D6R974	Ubiquitin carboxyl-terminal hydrolase isozyme L1;Ubiquitin carboxyl-terminal hydrolase	UCHL1	57329000448	52381999104	38959001600	39577001984	40335998976	39081000960	43934998528	30926000128	34393001984	31551000576	35866001408	40143998976	41735000064	20	20	20	92.8	92.8	92.8	24.824	0	323.31	570560000000	733
P09960	Leukotriene A-4 hydrolase	LTA4H	2780999936	2809799936	2664999936	3309700096	3022599936	3059500032	2731399936	2506800128	2589799936	4005400064	2229199872	2443200000	2417100032	32	32	32	59.9	59.9	59.9	69.284	0	323.31	37940000000	389
P09972;A8MVZ9;J3KSV6;J3QKP5;C9J8F3	Fructose-bisphosphate aldolase C;Fructose-bisphosphate aldolase	ALDOC	53862998016	55169998848	54527000576	54221000704	52375998464	57569001472	45946998784	72887001088	57614000128	63802998784	56099999744	56621998080	55645999104	34	29	29	87.4	75.3	75.3	39.455	0	323.31	873080000000	1721
Q71UI9;P0C0S5;C9J0D1;C9J386;A0A3B3IS11	Histone H2A.V;Histone H2A.Z;Histone H2A	H2AFV;H2AFZ	0	229300000	0	0	0	0	0	0	202130000	0	0	123610000	0	4	2	2	31.2	18.8	18.8	13.509	0.00052952	4.4984	1382400000	13
P0C7M7	Acyl-coenzyme A synthetase ACSM4, mitochondrial	ACSM4	18047000	0	0	0	0	0	0	0	0	0	0	0	0	2	2	2	6.7	6.7	6.7	65.702	0.0005291	4.4833	67893000	3
P0C7M8	C-type lectin domain family 2 member L	CLEC2L	0	0	0	0	0	0	0	0	0	0	0	0	6442900	1	1	1	5.1	5.1	5.1	23.926	0.0093969	1.988	13260000	2
P0C870;B5MC20	JmjC domain-containing protein 7	JMJD7	125810000	135420000	162840000	144320000	172640000	154500000	150780000	0	142900000	0	174530000	152280000	189620000	7	7	7	25.9	25.9	25.9	35.932	0	19.029	1846000000	51
Q6ICJ4;P0CG30;A0A087WY67;P0CG29	Glutathione S-transferase theta-2B;Glutathione S-transferase theta-2	Em:AP000351.3;GSTT2B;GSTT2	1476099968	1118000000	750369984	0	0	0	1315500032	1059200000	835000000	0	1355800064	0	0	9	8	8	49.6	46.5	46.5	25.948	0	60.483	8882200000	83
P0CG39	POTE ankyrin domain family member J	POTEJ	0	0	0	0	0	0	0	0	92230000	0	0	0	0	8	2	1	10.4	3.6	2.2	117.39	0.0018904	2.7937	1067200000	24
P0DJI8;E9PQD6	Serum amyloid A-1 protein;Amyloid protein A;Serum amyloid protein A(2-104);Serum amyloid protein A(3-104);Serum amyloid protein A(2-103);Serum amyloid protein A(2-102);Serum amyloid protein A(4-101);Serum amyloid A protein	SAA1	0	357649984	0	0	0	0	238180000	0	0	0	92689000	0	238280000	4	4	4	41	41	41	13.532	0	64.471	1172400000	17
P80294;P0DM35	Metallothionein-1H;Metallothionein 1H-like protein 1	MT1H;MT1HL1	0	0	0	0	0	0	0	0	0	0	0	0	81141000	1	1	1	19.7	19.7	19.7	6.0393	0.0045434	2.3465	1337200000	21
P0DN76;Q01081;Q8WU68	Splicing factor U2AF 35 kDa subunit;Splicing factor U2AF 26 kDa subunit	U2AF1;U2AF1L4	412449984	502150016	374449984	470340000	423070016	467800000	474880000	313780000	255460000	314660000	402180000	358900000	358140000	9	9	9	35	35	35	27.872	0	205.95	5293600000	65
P0DN79;P35520	Cystathionine beta-synthase	CBS	0	430129984	381649984	510840000	151570000	461180000	495489984	728920000	684720000	710209984	465190016	468190016	600550016	17	17	17	50.5	50.5	50.5	60.586	0	149.22	6122700000	111
P0DOY3;P0DOY2;P0CF74;A0M8Q6	Ig lambda-6 chain C region;Ig lambda-7 chain C region	IGLC6;IGLC7	0	0	0	0	160410000	0	0	0	0	0	0	0	0	4	1	1	65.1	17.9	17.9	11.265	0.00029231	6.8447	1349300000	31
P0DPH8;P0DPH7;Q6PEY2	Tubulin alpha-3E chain	TUBA3E	0	0	0	588499968	0	0	0	442260000	0	374150016	0	0	0	32	3	0	67.1	8.2	0	49.959	0.00051295	3.8912	2541800000	16
P10114	Ras-related protein Rap-2a	RAP2A	181670000	201450000	190340000	176040000	183430000	166340000	204860000	108800000	146550000	131000000	181420000	165140000	207780000	8	3	3	46.4	20.2	20.2	20.615	0.00027465	5.3333	2396700000	26
P10155	60 kDa SS-A/Ro ribonucleoprotein	TROVE2	737139968	834040000	797240000	860609984	658760000	961489984	852040000	908179968	1048499968	755139968	908540032	1128999936	965870016	18	18	18	43.3	43.3	43.3	60.67	0	157.73	11812000000	160
P10253	Lysosomal alpha-glucosidase;76 kDa lysosomal alpha-glucosidase;70 kDa lysosomal alpha-glucosidase	GAA	347740000	320150016	369289984	360860000	401230016	347440000	341080000	313710016	370400000	420369984	537449984	430089984	463129984	12	12	12	21.4	21.4	21.4	105.32	0	79.461	5280000000	89
P10301	Ras-related protein R-Ras	RRAS	0	0	94737000	0	155050000	0	0	0	129610000	0	117490000	0	122260000	7	7	5	43.6	43.6	31.2	23.48	0	9.1392	1156100000	17
P10316	HLA class I histocompatibility antigen, A-69 alpha chain	HLA-A	0	0	0	0	0	0	0	0	0	0	198860000	0	0	16	4	0	45.5	12.9	0	40.976	0.00051216	3.8686	433970000	7
P22492;P16403;Q02539;P10412;P16402	Histone H1t;Histone H1.2;Histone H1.1;Histone H1.4;Histone H1.3	HIST1H1T;HIST1H1C;HIST1H1A;HIST1H1E;HIST1H1D	0	0	0	0	0	0	0	0	0	73306000	0	0	0	1	1	1	5.3	5.3	5.3	22.019	0.0083406	2.0343	168070000	2
P10515;H0YDD4;E9PEJ4	Dihydrolipoyllysine-residue acetyltransferase component of pyruvate dehydrogenase complex, mitochondrial;Acetyltransferase component of pyruvate dehydrogenase complex	DLAT	4229499904	2971200000	3470299904	3134200064	2622899968	3886799872	3672900096	2303699968	2942500096	3028699904	3123000064	2975800064	3111200000	18	18	18	36.5	36.5	36.5	68.996	0	207.98	44498000000	289
P10586;H0Y6Z7;H0Y4H1;H0Y7Z9;H0Y380	Receptor-type tyrosine-protein phosphatase F	PTPRF	279110016	299209984	284480000	260140000	343289984	292040000	291600000	292360000	263970000	231720000	283350016	272769984	239680000	25	18	18	18.1	14.1	14.1	212.88	0	48.188	3781700000	99
P10599	Thioredoxin	TXN	1978899968	1952199936	1928300032	440040000	1855000064	1736499968	1859699968	2012499968	1856099968	2213799936	2079699968	1962800000	2269299968	7	7	7	57.1	57.1	57.1	11.737	0	27.737	26035000000	95
P10606	Cytochrome c oxidase subunit 5B, mitochondrial	COX5B	4547200000	3821700096	2797100032	2180100096	2980600064	2923300096	2520399872	1844499968	1775399936	1414499968	2016600064	2076000000	1827399936	6	6	6	41.1	41.1	41.1	13.696	0	26.95	33980000000	123
P10620;F5H7F6;F5H6X2	Microsomal glutathione S-transferase 1	MGST1	0	0	0	0	0	231130000	0	0	317500000	0	290480000	179650000	247810000	4	4	4	27.1	27.1	27.1	17.598	0	24.353	1772000000	28
P10644;K7EPB2	cAMP-dependent protein kinase type I-alpha regulatory subunit;cAMP-dependent protein kinase type I-alpha regulatory subunit, N-terminally processed	PRKAR1A	2390500096	2288800000	2172000000	2425299968	2552699904	2115200000	2521700096	2322099968	2608900096	2432900096	1851399936	2101299968	2463099904	22	22	20	53.5	53.5	49.3	42.981	0	99.084	31202000000	241
P10768;X6RA14;H7BZT7	S-formylglutathione hydrolase	ESD	5856600064	5400000000	6735300096	6849600000	3825900032	5821400064	6574000128	7441099776	7284299776	6683299840	6412899840	6928099840	8403599872	15	15	15	74.1	74.1	74.1	31.462	0	323.31	89612000000	480
P10809	60 kDa heat shock protein, mitochondrial	HSPD1	37454000128	32618999808	38684000256	32095000576	29493999616	38414999552	35848998912	28138999808	31035000832	36480000000	28519999488	33066999808	31271999488	51	51	51	79.4	79.4	79.4	61.054	0	323.31	484680000000	1729
P10909;H0YLK8;E7ERK6;H0YC35;E7ETB4	Clusterin;Clusterin beta chain;Clusterin alpha chain;Clusterin	CLU	2524999936	2470000128	2452199936	2651000064	2545900032	2684300032	2267500032	1931100032	1987100032	3451300096	2004099968	1902000000	1602200064	16	16	16	35	35	35	52.494	0	311.91	30447000000	202
P10915	Hyaluronan and proteoglycan link protein 1	HAPLN1	1101100032	1344400000	1061800000	1039000000	904499968	788969984	1957900032	643420032	896649984	836190016	720350016	1373900032	792560000	12	12	11	38.7	38.7	35.3	40.165	0	263.08	13982000000	128
P11021	78 kDa glucose-regulated protein	HSPA5	7913099776	7600300032	6744800256	8578400256	8386899968	8441600000	7553399808	4634699776	5855000064	8839199744	7526799872	5707700224	5331500032	35	34	34	47.2	47.2	47.2	72.332	0	323.31	95014000000	553
P11047	Laminin subunit gamma-1	LAMC1	1859500032	1870099968	1638300032	1537799936	2783500032	1472800000	1446499968	1886200064	1847299968	2039900032	1552899968	1625100032	1483200000	41	41	40	33.3	33.3	32.4	177.6	0	323.31	23526000000	389
P11137	Microtubule-associated protein 2	MAP2	19501000704	15150999552	15694000128	20233000960	17141999616	21852000256	10414000128	19026999296	12069999616	9449799680	12999999488	10812000256	14883000320	106	106	106	70.9	70.9	70.9	199.52	0	323.31	210410000000	1444
P11142;E9PKE3;E9PNE6;E9PN89	Heat shock cognate 71 kDa protein	HSPA8	68780998656	67804000256	59469000704	71413997568	62279000064	64962998272	63668998144	54320001024	59932999680	84875001856	63698001920	66289000448	62852001792	42	42	12	70.3	70.3	18.4	70.897	0	323.31	905460000000	1527
P11166	Solute carrier family 2, facilitated glucose transporter member 1	SLC2A1	0	41686000	40046000	51418000	61525000	0	0	0	0	0	0	37125000	0	5	5	5	9.1	9.1	9.1	54.083	0.00029317	6.9539	474730000	23
P11172;E9PFD2	Uridine 5-monophosphate synthase;Orotate phosphoribosyltransferase;Orotidine 5-phosphate decarboxylase	UMPS	126530000	113040000	157130000	154850000	131460000	152190000	102690000	145790000	145430000	141650000	132680000	132100000	163630000	6	6	6	20	20	20	52.221	0	12.605	1844000000	34
P11177;C9J634;F8WF02	Pyruvate dehydrogenase E1 component subunit beta, mitochondrial	PDHB	5816699904	4445300224	5316400128	4654400000	3896000000	6178200064	5114800128	3952800000	3902000128	3882899968	4208800000	4308400128	4267200000	20	20	20	76	76	76	39.233	0	323.31	67784000000	447
P11182;Q5VVL7	Lipoamide acyltransferase component of branched-chain alpha-keto acid dehydrogenase complex, mitochondrial	DBT	548470016	394089984	541160000	449249984	434080000	561689984	491110016	572620032	575969984	368950016	523460000	532150016	557280000	17	17	17	52.9	52.9	52.9	53.486	0	44.739	6881200000	128
P11215	Integrin alpha-M	ITGAM	0	112230000	96654000	123870000	125500000	72872000	126420000	110540000	111820000	101190000	113520000	116600000	126020000	13	13	13	14.7	14.7	14.7	127.18	0	24.817	1413900000	68
P11216	Glycogen phosphorylase, brain form	PYGB	28437000192	26592999424	32384000000	25898999808	25841999872	27679000576	31544000512	32529999872	33489999872	26858999808	30187999232	31030999040	31694999552	64	64	52	68.3	68.3	56.1	96.695	0	323.31	411320000000	1549
P11217	Glycogen phosphorylase, muscle form	PYGM	2769600000	4768399872	6002100224	7073500160	5149499904	5210899968	7072799744	7496900096	10193000448	7233200128	3970099968	8250699776	6624500224	55	43	42	67.1	51.7	50.4	97.091	0	323.31	85270000000	666
P11233;H7C3P7	Ras-related protein Ral-A	RALA	533440000	503520000	578460032	517249984	422169984	475590016	526480000	533500000	464720000	494320000	546499968	393049984	408560000	5	2	2	25.2	14.1	14.1	23.567	0	54.107	6550200000	43
P11234;C9J6B1	Ras-related protein Ral-B	RALB	404889984	363489984	479110016	466400000	278710016	501169984	481380000	338790016	403689984	354760000	405150016	326960000	354900000	7	7	4	26.7	26.7	15.5	23.408	0	63.054	5435600000	64
P11274	Breakpoint cluster region protein	BCR	64342000	78632000	65781000	105740000	76336000	111170000	72160000	0	84482000	0	56193000	79963000	76857000	13	11	11	13.4	12.6	12.6	142.82	0	18.737	1024500000	42
[truncated: 2,641 more rows]

## Sheet: Quantified proteins
Majority protein IDs	Protein names	Gene names	LFQ intensity C1218	LFQ intensity C1277	LFQ intensity C1368	LFQ intensity C1403	LFQ intensity C1438	LFQ intensity C1563	LFQ intensity C1576	LFQ intensity DMIX1	LFQ intensity DMIX3	LFQ intensity DMIX4	LFQ intensity DMIX5	LFQ intensity DMIX7	LFQ intensity DMIX8	Peptides	Razor + unique peptides	Unique peptides	Sequence coverage [%]	Unique + razor sequence coverage [%]	Unique sequence coverage [%]	Mol. weight [kDa]	Q-value	Score	Intensity	MS/MS count
[truncated: 2,440 more rows]

[truncated: 1 more sheets: Differential proteins]
