# Supplementary material for: Olfactory Bulb Proteomics Reveals Widespread Proteostatic Disturbances in Mixed Dementia and Guides for Potential Serum Biomarkers to Discriminate Alzheimer Disease and Mixed Dementia Phenotypes
Source: Preprints.org preprint supplement (doi:10.20944/preprints202104.0748.v1), 2021-04-28
Supplement: Supplementary file 3 [file Supplementary Table 3. Functional analysis OB DEPs mixD.xlsx]

## Sheet: Annotation
MyList	Gene ID	Type	Tax ID	Homologene Gene ID	Homologene Gene Tax ID	Gene Symbol	Description	Biological Process (GO)	Kinase Class (UniProt)	Protein Function (Protein Atlas)	Subcellular Location (Protein Atlas)	Drug (DrugBank)	Canonical Pathways_x000D_	Hallmark Gene Sets_x000D_	GO:0045055 regulated exocytosis	GO:0048858 cell projection morphogenesis	R-HSA-112315 Transmission across Chemical S	R-HSA-9675108 Nervous system development	GO:0099504 synaptic vesicle cycle	GO:0034332 adherens junction organization	GO:0072657 protein localization to membra	GO:0009123 nucleoside monophosphate metab	hsa05010 Alzheimer disease	GO:0070201 regulation of establishment of	R-HSA-71387 Metabolism of carbohydrates	GO:0010038 response to metal ion	GO:0019439 aromatic compound catabolic pr	GO:0030100 regulation of endocytosis	WP3888 VEGFA-VEGFR2 Signaling Pathway	GO:0032386 regulation of intracellular tr	GO:1901699 cellular response to nitrogen	R-HSA-9609507 Protein localization	GO:0031102 neuron projection regeneration	R-HSA-195258 RHO GTPase Effectors
COL1A2	1278	symbol	H. sapiens	1278	H. sapiens	COL1A2	collagen type I alpha 2 chain	GO:0070208 protein heterotrimerization;GO:0043589 skin morphogenesis;GO:0070206 protein trimerization		Disease related genes; Predicted secreted proteins; Cancer-related genes:Candidate cancer biomarkers	Endoplasmic reticulum (Supported)	Collagenase clostridium histolyticum	(M274)PID LYMPH ANGIOGENESIS PATHWAY; (M65)PID FRA PATHWAY; (M53)PID INTEGRIN3 PATHWAY	(M5942)HALLMARK UV RESPONSE DN; (M5930)HALLMARK EPITHELIAL MESENCHYMAL TRANSITION	0	0	1	1	0	1	0	0	0	0	0	0	0	0	0	0	1	0	0	0
BASP1	10409	symbol	H. sapiens	10409	H. sapiens	BASP1	brain abundant membrane attached signal protein 1	GO:2001074 regulation of metanephric ureteric bud development;GO:2001076 positive regulation of metanephric ureteric bud development;GO:0007354 zygotic determination of anterior/posterior axis, embryo		Transporters:Transporter channels and pores; Predicted intracellular proteins	Plasma membrane (Enhanced)			(M5930)HALLMARK EPITHELIAL MESENCHYMAL TRANSITION	0	1	1	0	0	0	0	0	0	0	0	0	0	0	0	0	0	0	0	0
PPFIA3	8541	symbol	H. sapiens	8541	H. sapiens	PPFIA3	PTPRF interacting protein alpha 3	GO:0016081 synaptic vesicle docking;GO:0048172 regulation of short-term neuronal synaptic plasticity;GO:0014047 glutamate secretion		Predicted intracellular proteins	Nucleoli fibrillar center;Vesicles (Uncertain)				1	0	1	0	1	0	0	0	0	1	0	0	0	0	0	0	0	0	0	0
CDH13	1012	symbol	H. sapiens	1012	H. sapiens	CDH13	cadherin 13	GO:0055095 lipoprotein particle mediated signaling;GO:0055096 low-density lipoprotein particle mediated signaling;GO:0071404 cellular response to low-density lipoprotein particle stimulus		Predicted intracellular proteins	Plasma membrane (Supported)			(M5909)HALLMARK MYOGENESIS; (M5921)HALLMARK COMPLEMENT; (M5939)HALLMARK P53 PATHWAY	0	1	1	0	0	1	0	0	0	0	0	0	0	1	0	0	0	0	0	0
CALU	813	symbol	H. sapiens	813	H. sapiens	CALU	calumenin	GO:0043687 post-translational protein modification;GO:0006464 cellular protein modification process;GO:0036211 protein modification process		Predicted intracellular proteins	Endoplasmic reticulum (Supported)			(M5930)HALLMARK EPITHELIAL MESENCHYMAL TRANSITION	0	0	1	0	0	0	0	0	0	0	0	0	0	0	1	0	0	0	0	0
GAP43	2596	symbol	H. sapiens	2596	H. sapiens	GAP43	growth associated protein 43	GO:0016198 axon choice point recognition;GO:0099150 regulation of postsynaptic specialization assembly;GO:0150052 regulation of postsynapse assembly		Transporters:Transporter channels and pores; Predicted intracellular proteins	Plasma membrane (Enhanced)		(M266)PID NCADHERIN PATHWAY		0	1	0	1	0	0	0	0	0	0	0	0	0	0	0	0	0	0	1	1
GPRIN1	114787	symbol	H. sapiens	114787	H. sapiens	GPRIN1	G protein regulated inducer of neurite outgrowth 1	GO:0031175 neuron projection development;GO:0048666 neuron development;GO:0030182 neuron differentiation		Predicted intracellular proteins	Plasma membrane (Supported); Additional: Vesicles				0	0	1	0	0	0	0	0	1	0	0	0	0	0	0	0	0	0	0	0
YBX1	4904	symbol	H. sapiens	4904	H. sapiens	YBX1	Y-box binding protein 1	GO:1990428 miRNA transport;GO:0070934 CRD-mediated mRNA stabilization;GO:1903608 protein localization to cytoplasmic stress granule		Predicted intracellular proteins; Transcription factors:beta-Barrel DNA-binding domains; Cancer-related genes:Candidate cancer biomarkers	Cytosol (Enhanced); Additional: Vesicles		(M50)PID PTP1B PATHWAY		0	0	0	1	0	0	0	0	0	0	0	0	1	0	0	0	0	0	0	0
PHYHIP	9796	symbol	H. sapiens	9796	H. sapiens	PHYHIP	phytanoyl-CoA 2-hydroxylase interacting protein	GO:0008104 protein localization;GO:0033036 macromolecule localization;GO:0051179 localization		Predicted intracellular proteins	Mitochondria (Supported); Additional: Nucleoplasm				0	0	0	0	0	0	0	0	0	0	0	0	0	0	0	0	0	0	0	0
CALM2	805	symbol	H. sapiens	805	H. sapiens	CALM2	calmodulin 2	GO:0051343 positive regulation of cyclic-nucleotide phosphodiesterase activity;GO:0060316 positive regulation of ryanodine-sensitive calcium-release channel activity;GO:1901844 regulation of cell communication by electrical coupling involved in cardiac conduction		Disease related genes; RAS pathway related proteins; Predicted intracellular proteins					0	0	1	1	1	0	0	1	1	0	1	1	0	0	0	0	0	0	0	1
CALM1	801	symbol	H. sapiens	801	H. sapiens	CALM1	calmodulin 1	GO:0051343 positive regulation of cyclic-nucleotide phosphodiesterase activity;GO:1901842 negative regulation of high voltage-gated calcium channel activity;GO:0060316 positive regulation of ryanodine-sensitive calcium-release channel activity		Disease related genes; RAS pathway related proteins; Predicted intracellular proteins	Vesicles (Approved)			(M5921)HALLMARK COMPLEMENT	1	0	1	1	1	0	1	1	1	1	1	1	0	1	0	1	0	0	0	1
CALM3	808	symbol	H. sapiens	808	H. sapiens	CALM3	calmodulin 3	GO:0051343 positive regulation of cyclic-nucleotide phosphodiesterase activity;GO:1901842 negative regulation of high voltage-gated calcium channel activity;GO:0060316 positive regulation of ryanodine-sensitive calcium-release channel activity		Disease related genes; RAS pathway related proteins; Predicted intracellular proteins		Chlorpromazine; Cinchocaine; Nicardipine; Fluphenazine; Isoflurane; Trifluoperazine; Loperamide; Perphenazine; Phenoxybenzamine; Felodipine; Melatonin; Promethazine; Pimozide; Nifedipine; Bepridil; Calcium; Aprindine; Deacetoxyvinzolidine; tert-butanol; Trimethyllysine; N-(6-Aminohexyl)-5-Chloro-1-Naphthalenesulfonamide; Prenylamine; Flunarizine; (3Z)-N,N-DIMETHYL-2-OXO-3-(4,5,6,7-TETRAHYDRO-1H-I…		(M5921)HALLMARK COMPLEMENT	1	0	1	1	1	0	1	1	1	1	1	1	0	1	0	1	0	0	0	1
ACAN	176	symbol	H. sapiens	176	H. sapiens	ACAN	aggrecan	GO:0042340 keratan sulfate catabolic process;GO:0018146 keratan sulfate biosynthetic process;GO:0042339 keratan sulfate metabolic process		Predicted secreted proteins; Predicted intracellular proteins		Ilomastat	(M5882)NABA PROTEOGLYCANS; (M5884)NABA CORE MATRISOME; (M5889)NABA MATRISOME		0	0	0	0	0	0	0	1	0	0	1	0	0	0	0	0	0	0	0	0
ADAM10	102	symbol	H. sapiens	102	H. sapiens	ADAM10	ADAM metallopeptidase domain 10	GO:0051089 constitutive protein ectodomain proteolysis;GO:0035333 Notch receptor processing, ligand-dependent;GO:0098696 regulation of neurotransmitter receptor localization to postsynaptic specialization membrane		CD markers; ENZYME proteins:Hydrolases; Cancer-related genes:Mutational cancer driver genes; Disease related genes; Enzymes; Potential drug targets; Transporters:Accessory Factors Involved in Transport; Predicted intracellular proteins	Plasma membrane (Supported); Additional: Nucleoplasm;Vesicles	XL784	(M70)PID PS1 PATHWAY; (M142)PID AJDISS 2PATHWAY; (M17)PID NOTCH PATHWAY	(M5916)HALLMARK APICAL SURFACE; (M5910)HALLMARK PROTEIN SECRETION	1	1	0	1	0	1	1	0	1	0	0	0	0	0	1	0	0	0	0	0
SNAP25	6616	symbol	H. sapiens	6616	H. sapiens	SNAP25	synaptosome associated protein 25	GO:0098881 exocytic insertion of neurotransmitter receptor to plasma membrane;GO:0098967 exocytic insertion of neurotransmitter receptor to postsynaptic membrane;GO:0016081 synaptic vesicle docking		Disease related genes; Transporters:Transporter channels and pores; Predicted intracellular proteins; FDA approved drug targets:Biotech drugs	Plasma membrane (Approved); Additional: Vesicles	Botulinum toxin type A		(M5953)HALLMARK KRAS SIGNALING UP	1	1	1	1	1	0	1	0	0	1	0	0	0	0	0	0	0	0	0	0
HAPLN4	404037	symbol	H. sapiens	404037	H. sapiens	HAPLN4	hyaluronan and proteoglycan link protein 4	GO:0001501 skeletal system development;GO:0007417 central nervous system development;GO:0007155 cell adhesion		Predicted secreted proteins		Hyaluronic acid	(M5882)NABA PROTEOGLYCANS; (M5884)NABA CORE MATRISOME; (M5889)NABA MATRISOME		0	0	0	0	0	0	0	0	0	0	1	0	0	0	0	0	0	0	0	0
OPCML	4978	symbol	H. sapiens	4978	H. sapiens	OPCML	opioid binding protein/cell adhesion molecule like	GO:0008038 neuron recognition;GO:0008037 cell recognition;GO:0048666 neuron development		Disease related genes; Predicted intracellular proteins					0	0	0	0	0	0	0	0	0	0	0	0	0	0	0	0	0	0	0	0
NUCB1	4924	symbol	H. sapiens	4924	H. sapiens	NUCB1	nucleobindin 1	GO:0072718 response to cisplatin;GO:1903533 regulation of protein targeting;GO:0097327 response to antineoplastic agent		Predicted secreted proteins	Golgi apparatus (Supported); Additional: Microtubules	Calcium citrate; Calcium Phosphate; Calcium phosphate dihydrate			0	0	0	0	0	0	1	0	0	1	0	1	0	0	0	1	0	0	0	0
TMED9	54732	symbol	H. sapiens	54732	H. sapiens	TMED9	transmembrane p24 trafficking protein 9	GO:0035964 COPI-coated vesicle budding;GO:0048200 Golgi transport vesicle coating;GO:0048205 COPI coating of Golgi vesicle							0	0	0	1	1	1	0	0	0	0	0	0	0	0	0	0	0	0	0	1
LY6H	4062	symbol	H. sapiens	4062	H. sapiens	LY6H	lymphocyte antigen 6 family member H	GO:0095500 acetylcholine receptor signaling pathway;GO:1903831 signal transduction involved in cellular response to ammonium ion;GO:1905144 response to acetylcholine		Predicted intracellular proteins					0	0	0	0	0	0	0	0	0	0	0	0	0	0	0	0	1	0	0	0
CEP170	9859	symbol	H. sapiens	9859	H. sapiens	CEP170	centrosomal protein 170			Predicted intracellular proteins	Centrosome (Enhanced); Additional: Cytosol;Mitotic spindle				0	0	0	0	0	0	0	0	0	0	0	0	0	0	0	0	0	0	0	0
TAGLN	6876	symbol	H. sapiens	6876	H. sapiens	TAGLN	transgelin	GO:0007517 muscle organ development;GO:0061061 muscle structure development;GO:0030855 epithelial cell differentiation		Predicted intracellular proteins; Cancer-related genes:Candidate cancer biomarkers	Microtubules;Mitochondria (Approved); Additional: Cytosol	Artenimol	(M186)PID PDGFRB PATHWAY	(M5909)HALLMARK MYOGENESIS; (M5930)HALLMARK EPITHELIAL MESENCHYMAL TRANSITION	0	0	0	0	0	0	0	0	0	0	0	0	0	0	0	0	0	0	0	0
NPTX1	4884	symbol	H. sapiens	4884	H. sapiens	NPTX1	neuronal pentraxin 1	GO:0060385 axonogenesis involved in innervation;GO:0098962 regulation of postsynaptic neurotransmitter receptor activity;GO:0060384 innervation		Transporters:Transporter channels and pores; Predicted secreted proteins					0	1	1	0	1	0	0	0	0	0	0	0	0	0	0	0	0	0	0	0
CLTA	1211	symbol	H. sapiens	1211	H. sapiens	CLTA	clathrin light chain A	GO:0032799 low-density lipoprotein receptor particle metabolic process;GO:0032802 low-density lipoprotein particle receptor catabolic process;GO:0048268 clathrin coat assembly		Predicted intracellular proteins	Endosomes;Lysosomes;Vesicles (Enhanced)		(M243)PID ARF 3PATHWAY; (M195)PID CMYB PATHWAY	(M5910)HALLMARK PROTEIN SECRETION	0	0	0	1	1	0	0	0	0	0	0	0	0	0	0	0	0	0	0	1
SCG2	7857	symbol	H. sapiens	7857	H. sapiens	SCG2	secretogranin II	GO:0050930 induction of positive chemotaxis;GO:0048245 eosinophil chemotaxis;GO:0072677 eosinophil migration		Predicted secreted proteins	Golgi apparatus (Approved); Additional: Vesicles			(M5919)HALLMARK HEDGEHOG SIGNALING; (M5930)HALLMARK EPITHELIAL MESENCHYMAL TRANSITION	0	1	0	0	0	1	0	0	0	1	0	0	0	0	0	0	0	0	0	0
SRC	6714	symbol	H. sapiens	6714	H. sapiens	SRC	SRC proto-oncogene, non-receptor tyrosine kinase	GO:0001545 primary ovarian follicle growth;GO:0086098 angiotensin-activated signaling pathway involved in heart process;GO:2000386 positive regulation of ovarian follicle development	Tyr protein kinase family	Disease related genes; ENZYME proteins:Transferases; Kinases:Tyr protein kinases; Enzymes; FDA approved drug targets:Small molecule drugs; Cancer-related genes:Candidate cancer biomarkers; Transporters:Accessory Factors Involved in Transport; Predicted intracellular proteins	Cell Junctions;Plasma membrane (Supported); Additional: Cytosol;Nucleoplasm	Dasatinib; RU84687; RU79256; N6-Benzyl Adenosine-5'-Diphosphate; RU85493; RU78262; Phosphonotyrosine; Malonic acid; RU83876; RU90395; RU79072; RU78783; 1-Tert-Butyl-3-(4-Chloro-Phenyl)-1h-Pyrazolo[3,4-D]Pyrimidin-4-Ylamine; PASBN; 2-[4-[(Z)-2-Acetamido-3-oxo-3-[[(3S)-2-oxo-1-[(4-phenylphenyl)methyl]azepan-3-yl]amino]prop-1-enyl]-2-formylphenyl]acetic acid; PAS219; DPI59; RU82197; Phenylphosphate;…	(M9174)ST STAT3 PATHWAY; (M14775)ST G ALPHA S PATHWAY; (M26)PID NFKAPPAB ATYPICAL PATHWAY	(M5915)HALLMARK APICAL JUNCTION; (M5921)HALLMARK COMPLEMENT	0	1	1	1	1	1	0	0	0	1	0	1	0	1	1	1	1	0	1	1
PPP3CC	5533	symbol	H. sapiens	5533	H. sapiens	PPP3CC	protein phosphatase 3 catalytic subunit gamma	GO:1900244 positive regulation of synaptic vesicle endocytosis;GO:1903423 positive regulation of synaptic vesicle recycling;GO:1900242 regulation of synaptic vesicle endocytosis		Enzymes; Predicted intracellular proteins; ENZYME proteins:Hydrolases	Vesicles (Approved)		(M8626)SIG BCR SIGNALING PATHWAY; (M10)PID BCR 5PATHWAY		0	0	1	1	1	1	1	1	1	1	0	0	0	1	0	0	0	0	0	0
NDUFS4	4724	symbol	H. sapiens	4724	H. sapiens	NDUFS4	NADH:ubiquinone oxidoreductase subunit S4	GO:0048146 positive regulation of fibroblast proliferation;GO:0006120 mitochondrial electron transport, NADH to ubiquinone;GO:0010257 NADH dehydrogenase complex assembly		Disease related genes; Predicted intracellular proteins	Mitochondria (Supported)	NADH		(M5936)HALLMARK OXIDATIVE PHOSPHORYLATION	0	0	1	0	0	0	0	1	1	0	0	0	0	0	0	0	1	0	0	0
GORASP2	26003	symbol	H. sapiens	26003	H. sapiens	GORASP2	golgi reassembly stacking protein 2	GO:0061951 establishment of protein localization to plasma membrane;GO:0007030 Golgi organization;GO:0072659 protein localization to plasma membrane		Predicted intracellular proteins	Golgi apparatus (Enhanced)				0	0	0	1	0	0	1	0	0	0	0	0	0	0	0	0	0	0	0	0
SOD1	6647	symbol	H. sapiens	6647	H. sapiens	SOD1	superoxide dismutase 1	GO:0034465 response to carbon monoxide;GO:0097332 response to antipsychotic drug;GO:1902177 positive regulation of oxidative stress-induced intrinsic apoptotic signaling pathway		ENZYME proteins:Oxidoreductases; Disease related genes; Enzymes; Potential drug targets; Cancer-related genes:Candidate cancer biomarkers; Predicted intracellular proteins	Cytosol;Nucleoplasm;Plasma membrane (Supported)	Dopamine; Isoprenaline; Zinc; 5-fluorouridine; S-oxy-L-cysteine; Arimoclomol; Cannabidiol; Medical Cannabis; Nabiximols; Zinc acetate; Zinc chloride; Zinc sulfate, unspecified form	(M285)PID HNF3A PATHWAY; (M200)PID ERA GENOMIC PATHWAY	(M5938)HALLMARK REACTIVE OXYGEN SPECIES PATHWAY; (M5910)HALLMARK PROTEIN SECRETION; (M5949)HALLMARK PEROXISOME	1	1	1	1	0	1	0	0	0	0	0	1	0	1	0	0	1	0	1	0
OGN	4969	symbol	H. sapiens	4969	H. sapiens	OGN	osteoglycin	GO:0042340 keratan sulfate catabolic process;GO:0018146 keratan sulfate biosynthetic process;GO:0042339 keratan sulfate metabolic process		Predicted secreted proteins; Predicted intracellular proteins	Endoplasmic reticulum (Supported)		(M5882)NABA PROTEOGLYCANS; (M5884)NABA CORE MATRISOME; (M5889)NABA MATRISOME		0	0	0	0	0	0	0	1	0	0	1	0	0	0	0	0	0	0	0	0
GFAP	2670	symbol	H. sapiens	2670	H. sapiens	GFAP	glial fibrillary acidic protein	GO:1904714 regulation of chaperone-mediated autophagy;GO:0061684 chaperone-mediated autophagy;GO:0045109 intermediate filament organization		Predicted intracellular proteins; Disease related genes; Candidate cardiovascular disease genes	Intermediate filaments (Supported)				0	0	0	1	0	1	0	0	0	0	0	0	0	0	0	0	0	0	0	0
ITGB8	3696	symbol	H. sapiens	3696	H. sapiens	ITGB8	integrin subunit beta 8	GO:0061520 Langerhans cell differentiation;GO:0060022 hard palate development;GO:1901388 regulation of transforming growth factor beta activation		Cancer-related genes:Candidate cancer biomarkers	Cytosol;Plasma membrane (Approved)		(M212)PID INTEGRIN5 PATHWAY; (M47)PID INTEGRIN CS PATHWAY	(M5932)HALLMARK INFLAMMATORY RESPONSE	1	0	0	1	0	1	0	0	0	0	0	0	0	0	0	0	0	0	0	0
CYB5A	1528	symbol	H. sapiens	1528	H. sapiens	CYB5A	cytochrome b5 type A	GO:0019852 L-ascorbic acid metabolic process;GO:0046686 response to cadmium ion;GO:0006767 water-soluble vitamin metabolic process		Disease related genes; Predicted intracellular proteins	Cytosol;Vesicles (Enhanced)	Dimethyl Propionate Ester Heme; Chromium; Chromic citrate; Chromic nitrate; Chromium gluconate; Chromium nicotinate; Chromous sulfate		(M5934)HALLMARK XENOBIOTIC METABOLISM; (M5936)HALLMARK OXIDATIVE PHOSPHORYLATION; (M5937)HALLMARK GLYCOLYSIS	0	0	0	0	0	0	0	1	0	0	0	1	0	0	0	0	0	1	0	0
NRXN3	9369	symbol	H. sapiens	9369	H. sapiens	NRXN3	neurexin 3	GO:0007158 neuron cell-cell adhesion;GO:0071625 vocalization behavior;GO:0035176 social behavior		Predicted intracellular proteins					0	1	1	0	0	0	0	0	0	0	0	0	0	0	0	0	0	0	0	0
STX1A	6804	symbol	H. sapiens	6804	H. sapiens	STX1A	syntaxin 1A	GO:0010701 positive regulation of norepinephrine secretion;GO:0010807 regulation of synaptic vesicle priming;GO:0009629 response to gravity		Transporters:Transporter channels and pores; Transporters:Accessory Factors Involved in Transport; Predicted intracellular proteins	Vesicles (Approved); Additional: Nuclear membrane				1	0	1	1	1	1	1	0	0	1	0	0	0	1	0	1	0	1	0	0
CNTNAP2	26047	symbol	H. sapiens	26047	H. sapiens	CNTNAP2	contactin associated protein 2	GO:0071109 superior temporal gyrus development;GO:0045163 clustering of voltage-gated potassium channels;GO:0071205 protein localization to juxtaparanode region of axon		Disease related genes; Predicted intracellular proteins					0	1	1	0	0	0	0	0	0	0	0	0	0	0	0	0	0	0	0	0
ATPAF1	64756	symbol	H. sapiens	64756	H. sapiens	ATPAF1	ATP synthase mitochondrial F1 complex assembly factor 1	GO:0033615 mitochondrial proton-transporting ATP synthase complex assembly;GO:0043461 proton-transporting ATP synthase complex assembly;GO:0070071 proton-transporting two-sector ATPase complex assembly		Predicted intracellular proteins	Mitochondria (Approved)				0	0	0	0	1	0	0	0	1	0	0	0	0	0	0	0	0	0	0	0
VPS13C	54832	symbol	H. sapiens	54832	H. sapiens	VPS13C	vacuolar protein sorting 13 homolog C	GO:1905089 regulation of parkin-mediated stimulation of mitophagy in response to mitochondrial depolarization;GO:1905090 negative regulation of parkin-mediated stimulation of mitophagy in response to mitochondrial depolarization;GO:0061734 parkin-mediated stimulation of mitophagy in response to mitochondrial depolarization		Disease related genes; Predicted intracellular proteins	Microtubules (Approved)				0	0	1	0	0	1	1	0	1	0	0	0	0	0	0	0	0	0	0	0
STX1B	112755	symbol	H. sapiens	112755	H. sapiens	STX1B	syntaxin 1B	GO:1904050 positive regulation of spontaneous neurotransmitter secretion;GO:1905302 negative regulation of macropinocytosis;GO:0060025 regulation of synaptic activity		Disease related genes; Predicted intracellular proteins	Vesicles (Approved); Additional: Nuclear membrane				1	1	1	1	1	1	1	0	0	1	0	0	0	1	0	1	0	0	1	0
ACTN2	88	symbol	H. sapiens	88	H. sapiens	ACTN2	actinin alpha 2	GO:0051695 actin filament uncapping;GO:0086097 phospholipase C-activating angiotensin-activated signaling pathway;GO:0030035 microspike assembly		Predicted intracellular proteins; Disease related genes; Transporters:Accessory Factors Involved in Transport; Potential drug targets	Actin filaments (Uncertain)			(M5909)HALLMARK MYOGENESIS; (M5915)HALLMARK APICAL JUNCTION; (M5921)HALLMARK COMPLEMENT	1	0	1	1	0	1	1	0	0	0	0	0	0	1	0	1	1	0	0	1
CHL1	10752	symbol	H. sapiens	10752	H. sapiens	CHL1	cell adhesion molecule L1 like	GO:0031103 axon regeneration;GO:0031102 neuron projection regeneration;GO:0048678 response to axon injury		Predicted intracellular proteins					0	1	0	1	0	0	0	0	0	0	0	0	0	0	0	0	0	0	1	1
ERP44	23071	symbol	H. sapiens	23071	H. sapiens	ERP44	endoplasmic reticulum protein 44	GO:0045454 cell redox homeostasis;GO:0006986 response to unfolded protein;GO:0035966 response to topologically incorrect protein		Predicted intracellular proteins					1	0	0	0	0	0	0	0	0	0	0	0	0	0	0	0	0	0	0	0
AP3D1	8943	symbol	H. sapiens	8943	H. sapiens	AP3D1	adaptor related protein complex 3 subunit delta 1	GO:0016182 synaptic vesicle budding from endosome;GO:0048499 synaptic vesicle membrane organization;GO:0051138 positive regulation of NK T cell differentiation		Disease related genes; Predicted intracellular proteins	Cytosol (Approved)				0	0	1	0	1	0	1	0	0	0	0	0	0	0	0	0	0	0	0	0
FXYD6	53826	symbol	H. sapiens	53826	H. sapiens	FXYD6	FXYD domain containing ion transport regulator 6	GO:2000649 regulation of sodium ion transmembrane transporter activity;GO:1902305 regulation of sodium ion transmembrane transport;GO:1903779 regulation of cardiac conduction		Transporters:Transporter channels and pores	Cytosol;Nucleoplasm (Approved)				0	0	1	1	0	0	0	0	0	0	0	0	0	0	0	0	0	0	0	0
FXYD6-FXYD2	100533181	symbol	H. sapiens	100533181	H. sapiens	FXYD6-FXYD2	FXYD6-FXYD2 readthrough				Nuclear membrane;Vesicles (Approved)				0	0	0	0	0	0	0	0	0	0	0	0	0	0	0	0	0	0	0	0
IQGAP1	8826	symbol	H. sapiens	8826	H. sapiens	IQGAP1	IQ motif containing GTPase activating protein 1	GO:1900086 positive regulation of peptidyl-tyrosine autophosphorylation;GO:1900084 regulation of peptidyl-tyrosine autophosphorylation;GO:0072015 glomerular visceral epithelial cell development		Predicted intracellular proteins	Cell Junctions;Plasma membrane (Supported)	Artenimol	(M163)PID LIS1 PATHWAY; (M72)PID NECTIN PATHWAY; (M156)PID ECADHERIN NASCENT AJ PATHWAY		1	1	1	1	0	1	0	0	0	0	0	1	0	1	1	0	1	0	0	1
THY1	7070	symbol	H. sapiens	7070	H. sapiens	THY1	Thy-1 cell surface antigen	GO:2000298 regulation of Rho-dependent protein serine/threonine kinase activity;GO:0042670 retinal cone cell differentiation;GO:0046549 retinal cone cell development		CD markers; Predicted intracellular proteins	Nucleoplasm (Approved); Additional: Plasma membrane		(M169)PID INTEGRIN2 PATHWAY; (M159)PID AMB2 NEUTROPHILS PATHWAY; (M53)PID INTEGRIN3 PATHWAY	(M5919)HALLMARK HEDGEHOG SIGNALING; (M5916)HALLMARK APICAL SURFACE; (M5915)HALLMARK APICAL JUNCTION	0	1	1	1	0	1	1	0	0	0	0	0	0	0	0	0	0	0	1	0
HPCAL1	3241	symbol	H. sapiens	3241	H. sapiens	HPCAL1	hippocalcin like 1			Predicted intracellular proteins					0	0	0	0	0	0	0	0	0	0	0	0	0	0	0	0	0	0	0	0
RAPGEF2	9693	symbol	H. sapiens	9693	H. sapiens	RAPGEF2	Rap guanine nucleotide exchange factor 2	GO:2000670 positive regulation of dendritic cell apoptotic process;GO:0048022 negative regulation of melanin biosynthetic process;GO:2000481 positive regulation of cAMP-dependent protein kinase activity		Predicted intracellular proteins	Cytosol;Plasma membrane (Supported)				0	1	1	1	1	1	1	0	0	0	0	0	0	0	0	0	1	0	1	0
SGIP1	84251	symbol	H. sapiens	84251	H. sapiens	SGIP1	SH3GL interacting endocytic adaptor 1	GO:2000253 positive regulation of feeding behavior;GO:0048268 clathrin coat assembly;GO:0002021 response to dietary excess		Predicted intracellular proteins	Mitochondria (Approved)				0	0	0	1	0	0	0	0	0	0	0	0	0	1	0	0	0	0	0	0
COX5B	1329	symbol	H. sapiens	1329	H. sapiens	COX5B	cytochrome c oxidase subunit 5B	GO:0006123 mitochondrial electron transport, cytochrome c to oxygen;GO:0019646 aerobic electron transport chain;GO:0007585 respiratory gaseous exchange		Transporters:Primary Active Transporters; Predicted intracellular proteins	Mitochondria (Enhanced)	Cholic Acid; N-Formylmethionine		(M5936)HALLMARK OXIDATIVE PHOSPHORYLATION	0	0	0	0	0	0	0	1	1	0	0	0	0	0	0	0	0	0	0	0
PRKCG	5582	symbol	H. sapiens	5582	H. sapiens	PRKCG	protein kinase C gamma	GO:1990911 response to psychosocial stress;GO:0032425 positive regulation of mismatch repair;GO:0032423 regulation of mismatch repair	AGC Ser/Thr protein kinase family	Kinases:AGC Ser/Thr protein kinases; Disease related genes; ENZYME proteins:Transferases; Enzymes; RAS pathway related proteins; Potential drug targets; Predicted intracellular proteins		Fostamatinib	(M252)PID IL8 CXCR1 PATHWAY; (M207)PID RETINOIC ACID PATHWAY; (M210)PID IL8 CXCR2 PATHWAY	(M5950)HALLMARK ALLOGRAFT REJECTION	1	0	1	1	1	0	0	0	0	1	0	1	0	1	0	1	0	0	0	1
RCN2	5955	symbol	H. sapiens	5955	H. sapiens	RCN2	reticulocalbin 2			Predicted intracellular proteins	Endoplasmic reticulum (Enhanced)				0	0	0	0	0	0	0	0	0	0	0	0	0	0	0	0	0	0	0	0
RCN1	5954	symbol	H. sapiens	5954	H. sapiens	RCN1	reticulocalbin 1	GO:0043010 camera-type eye development;GO:0001701 in utero embryonic development;GO:0001654 eye development		Predicted intracellular proteins	Endoplasmic reticulum (Supported)				0	0	0	0	0	0	0	0	0	0	0	0	0	0	1	0	0	0	0	0
CD200	4345	symbol	H. sapiens	4345	H. sapiens	CD200	CD200 molecule	GO:0150070 regulation of arginase activity;GO:0150072 positive regulation of arginase activity;GO:0150073 regulation of protein-glutamine gamma-glutamyltransferase activity		CD markers; Predicted intracellular proteins					1	0	0	1	0	0	0	0	0	1	0	0	0	0	0	0	0	0	0	0
DMTN	2039	symbol	H. sapiens	2039	H. sapiens	DMTN	dematin actin binding protein	GO:0070560 protein secretion by platelet;GO:1901731 positive regulation of platelet aggregation;GO:0035585 calcium-mediated signaling using extracellular calcium source		Predicted intracellular proteins				(M5945)HALLMARK HEME METABOLISM	1	1	1	1	1	1	1	0	0	1	0	1	0	0	0	1	1	0	1	0
CRTAC1	55118	symbol	H. sapiens	55118	H. sapiens	CRTAC1	cartilage acidic protein 1			Predicted secreted proteins; Predicted intracellular proteins					0	0	0	0	0	0	0	0	0	0	0	0	0	0	0	0	0	0	0	0
GPC1	2817	symbol	H. sapiens	2817	H. sapiens	GPC1	glypican 1	GO:0030200 heparan sulfate proteoglycan catabolic process;GO:0030167 proteoglycan catabolic process;GO:2001016 positive regulation of skeletal muscle cell differentiation		Disease related genes; Predicted intracellular proteins	Cytosol;Plasma membrane (Supported)		(M33)PID GLYPICAN 1PATHWAY; (M5880)NABA ECM AFFILIATED; (M5885)NABA MATRISOME ASSOCIATED	(M5891)HALLMARK HYPOXIA; (M5930)HALLMARK EPITHELIAL MESENCHYMAL TRANSITION; (M5937)HALLMARK GLYCOLYSIS	0	1	1	1	0	0	1	1	0	0	1	0	0	0	1	0	0	0	0	0
OMG	4974	symbol	H. sapiens	4974	H. sapiens	OMG	oligodendrocyte myelin glycoprotein	GO:0031102 neuron projection regeneration;GO:0050771 negative regulation of axonogenesis;GO:0010771 negative regulation of cell morphogenesis involved in differentiation		Predicted intracellular proteins			(M153)PID P75 NTR PATHWAY		0	1	0	1	0	0	0	0	0	0	0	0	0	0	0	0	0	0	1	0
CHCHD3	54927	symbol	H. sapiens	54927	H. sapiens	CHCHD3	coiled-coil-helix-coiled-coil-helix domain containing 3	GO:0008053 mitochondrial fusion;GO:0042407 cristae formation;GO:0007007 inner mitochondrial membrane organization		Predicted intracellular proteins	Mitochondria (Supported)				0	0	0	0	1	0	0	1	1	0	0	0	0	0	0	0	0	1	0	0
CLTB	1212	symbol	H. sapiens	1212	H. sapiens	CLTB	clathrin light chain B	GO:0048268 clathrin coat assembly;GO:0072583 clathrin-dependent endocytosis;GO:0006898 receptor-mediated endocytosis		Predicted intracellular proteins	Vesicles (Supported); Additional: Cytosol;Plasma membrane		(M243)PID ARF 3PATHWAY	(M5941)HALLMARK UV RESPONSE UP	0	0	0	1	1	0	0	0	0	0	0	0	0	0	0	0	0	0	0	1
FUS	2521	symbol	H. sapiens	2521	H. sapiens	FUS	FUS RNA binding protein	GO:1905168 positive regulation of double-strand break repair via homologous recombination;GO:2000781 positive regulation of double-strand break repair;GO:0045911 positive regulation of DNA recombination		Cancer-related genes; Disease related genes; Predicted intracellular proteins	Nucleoplasm (Enhanced)			(M5922)HALLMARK UNFOLDED PROTEIN RESPONSE	0	0	0	1	0	0	0	0	0	0	0	0	1	0	0	0	0	0	0	0
TXNDC12	51060	symbol	H. sapiens	51060	H. sapiens	TXNDC12	thioredoxin domain containing 12	GO:1902236 negative regulation of endoplasmic reticulum stress-induced intrinsic apoptotic signaling pathway;GO:1902235 regulation of endoplasmic reticulum stress-induced intrinsic apoptotic signaling pathway;GO:1903573 negative regulation of response to endoplasmic reticulum stress		Enzymes; ENZYME proteins:Oxidoreductases; Predicted intracellular proteins					0	0	0	0	0	0	0	0	0	0	0	0	0	0	0	0	0	0	0	0
PAM	5066	symbol	H. sapiens	5066	H. sapiens	PAM	peptidylglycine alpha-amidating monooxygenase	GO:0018032 protein amidation;GO:0001519 peptide amidation;GO:0031179 peptide modification		ENZYME proteins:Oxidoreductases; Enzymes; Predicted secreted proteins; ENZYME proteins:Lyases; Predicted intracellular proteins	Cytosol;Golgi apparatus (Approved)	Ascorbic acid; N-Alpha-Acetyl-3,5-Diiodotyrosylglycine; N-alpha-Acetyl-3,5-diiodotyrosyl-D-threonine		(M5910)HALLMARK PROTEIN SECRETION; (M5891)HALLMARK HYPOXIA; (M5937)HALLMARK GLYCOLYSIS	0	0	0	1	0	1	0	0	0	1	0	1	0	0	0	0	0	0	0	0
ATP5D	513	gene_synonym	H. sapiens	513	H. sapiens	ATP5F1D	ATP synthase F1 subunit delta	GO:0033615 mitochondrial proton-transporting ATP synthase complex assembly;GO:0043461 proton-transporting ATP synthase complex assembly;GO:0070071 proton-transporting two-sector ATPase complex assembly		Predicted intracellular proteins		Isoflurane; Desflurane		(M5936)HALLMARK OXIDATIVE PHOSPHORYLATION	0	0	0	0	1	0	0	1	1	0	0	1	0	0	0	0	0	0	0	0
SETD7	80854	symbol	H. sapiens	80854	H. sapiens	SETD7	SET domain containing 7, histone lysine methyltransferase	GO:0018026 peptidyl-lysine monomethylation;GO:0051570 regulation of histone H3-K9 methylation;GO:0018027 peptidyl-lysine dimethylation		ENZYME proteins:Transferases; Enzymes; Predicted intracellular proteins	Nucleoli;Nucleoli rim (Enhanced); Additional: Mitotic chromosome	S-adenosyl-L-homocysteine	(M261)PID P53 REGULATION PATHWAY		0	0	0	0	0	0	0	0	0	0	0	1	0	0	0	0	0	0	0	0
TIMM44	10469	symbol	H. sapiens	10469	H. sapiens	TIMM44	translocase of inner mitochondrial membrane 44	GO:0030150 protein import into mitochondrial matrix;GO:0044743 protein transmembrane import into intracellular organelle;GO:0065002 intracellular protein transmembrane transport		Predicted intracellular proteins	Mitochondria (Enhanced)				0	0	0	0	0	0	1	1	1	0	0	0	0	0	0	0	0	1	0	0
VWF	7450	symbol	H. sapiens	7450	H. sapiens	VWF	von Willebrand factor	GO:0007597 blood coagulation, intrinsic pathway;GO:0072378 blood coagulation, fibrin clot formation;GO:0002576 platelet degranulation		Disease related genes; Predicted secreted proteins; Cancer-related genes:Candidate cancer biomarkers; FDA approved drug targets:Biotech drugs; Candidate cardiovascular disease genes		Antihemophilic factor, human recombinant; Egaptivon pegol; Caplacizumab; Simoctocog alfa; Antihemophilic Factor (Recombinant), PEGylated; Susoctocog alfa; Efmoroctocog alfa; Lonoctocog alfa; Moroctocog alfa	(M3008)NABA ECM GLYCOPROTEINS; (M5884)NABA CORE MATRISOME; (M5889)NABA MATRISOME	(M5946)HALLMARK COAGULATION; (M5915)HALLMARK APICAL JUNCTION	1	0	1	1	0	1	0	0	0	0	0	0	0	0	0	0	0	0	0	0
SNCG	6623	symbol	H. sapiens	6623	H. sapiens	SNCG	synuclein gamma	GO:0014046 dopamine secretion;GO:0014059 regulation of dopamine secretion;GO:0015872 dopamine transport		Transporters:Transporter channels and pores; Predicted intracellular proteins	Centrosome (Supported)			(M5905)HALLMARK ADIPOGENESIS	0	0	1	0	1	0	0	0	0	1	0	0	0	0	0	0	0	0	0	0
SIRPA	140885	symbol	H. sapiens	140885	H. sapiens	SIRPA	signal regulatory protein alpha	GO:1903720 negative regulation of I-kappaB phosphorylation;GO:0071641 negative regulation of macrophage inflammatory protein 1 alpha production;GO:0071650 negative regulation of chemokine (C-C motif) ligand 5 production		CD markers				(M5915)HALLMARK APICAL JUNCTION	1	0	1	1	1	0	0	0	0	0	0	1	0	1	0	0	0	0	1	0
SIRPB1	10326	symbol	H. sapiens	10326	H. sapiens	SIRPB1	signal regulatory protein beta 1	GO:0050766 positive regulation of phagocytosis;GO:0050764 regulation of phagocytosis;GO:0045807 positive regulation of endocytosis		CD markers; Predicted intracellular proteins	Vesicles (Uncertain)				1	0	0	0	0	0	0	0	0	0	0	0	0	1	0	0	0	0	0	0
CAMKV	79012	symbol	H. sapiens	79012	H. sapiens	CAMKV	CaM kinase like vesicle associated	GO:0099159 regulation of modification of postsynaptic structure;GO:1905244 regulation of modification of synaptic structure;GO:0099010 modification of postsynaptic structure	CAMK Ser/Thr protein kinase family	Enzymes; Kinases:CAMK Ser/Thr protein kinases; Predicted intracellular proteins	Nucleoplasm (Approved); Additional: Cytokinetic bridge				0	0	0	0	0	0	0	0	0	0	0	0	0	0	0	0	0	0	0	0
EEF1B2	1933	symbol	H. sapiens	1933	H. sapiens	EEF1B2	eukaryotic translation elongation factor 1 beta 2	GO:0006414 translational elongation;GO:0006412 translation;GO:0043043 peptide biosynthetic process		Predicted intracellular proteins	Cytosol;Nucleoli fibrillar center (Approved)			(M5926)HALLMARK MYC TARGETS V1	0	0	0	1	0	0	0	0	0	0	0	0	0	0	0	0	0	0	0	0
MYL6	4637	symbol	H. sapiens	4637	H. sapiens	MYL6	myosin light chain 6	GO:0030049 muscle filament sliding;GO:0033275 actin-myosin filament sliding;GO:0070252 actin-mediated cell contraction		Predicted intracellular proteins					0	0	1	1	0	1	0	0	0	0	0	0	0	0	0	0	0	0	0	1
VSNL1	7447	symbol	H. sapiens	7447	H. sapiens	VSNL1	visinin like 1	GO:0035774 positive regulation of insulin secretion involved in cellular response to glucose stimulus;GO:0046676 negative regulation of insulin secretion;GO:0090278 negative regulation of peptide hormone secretion		Predicted intracellular proteins	Cytosol (Approved)				0	0	0	0	1	0	0	0	0	1	0	0	0	1	0	0	0	0	0	0
ENPP6	133121	symbol	H. sapiens	133121	H. sapiens	ENPP6	ectonucleotide pyrophosphatase/phosphodiesterase 6	GO:0019695 choline metabolic process;GO:0046475 glycerophospholipid catabolic process;GO:0009395 phospholipid catabolic process		Enzymes; Predicted intracellular proteins; ENZYME proteins:Hydrolases	Golgi apparatus (Approved)				0	0	0	0	1	0	0	0	0	0	0	0	1	0	0	0	0	0	0	0
DYNC1I1	1780	symbol	H. sapiens	1780	H. sapiens	DYNC1I1	dynein cytoplasmic 1 intermediate chain 1	GO:0047496 vesicle transport along microtubule;GO:0099518 vesicle cytoskeletal trafficking;GO:0072384 organelle transport along microtubule		Predicted intracellular proteins					0	0	0	1	1	0	0	0	0	0	0	0	0	0	0	0	0	0	0	1
UQCRB	7381	symbol	H. sapiens	7381	H. sapiens	UQCRB	ubiquinol-cytochrome c reductase binding protein	GO:0006122 mitochondrial electron transport, ubiquinol to cytochrome c;GO:0009060 aerobic respiration;GO:0042775 mitochondrial ATP synthesis coupled electron transport		Disease related genes; Predicted intracellular proteins		2-Hexyloxy-6-Hydroxymethyl-Tetrahydro-Pyran-3,4,5-Triol; 6-Hydroxy-5-undecyl-4,7-benzothiazoledione; Azoxystrobin; 5-Heptyl-6-hydroxy-1,3-benzothiazole-4,7-dione; (5S)-3-ANILINO-5-(2,4-DIFLUOROPHENYL)-5-METHYL-1,3-OXAZOLIDINE-2,4-DIONE; (S)-famoxadone; METHYL (2Z)-3-METHOXY-2-{2-[(E)-2-PHENYLVINYL]PHENYL}ACRYLATE; 2-Nonyl-4-quinolinol 1-oxide; Ubiquinone Q2		(M5936)HALLMARK OXIDATIVE PHOSPHORYLATION	0	0	0	0	0	0	0	1	1	0	0	0	0	0	0	0	0	0	0	0
ATP6V1G2	534	symbol	H. sapiens	534	H. sapiens	ATP6V1G2	ATPase H+ transporting V1 subunit G2	GO:0090383 phagosome acidification;GO:0015682 ferric iron transport;GO:0033572 transferrin transport		Predicted intracellular proteins					0	0	1	1	1	0	0	1	0	0	0	0	0	0	0	0	1	0	0	1
HOMER1	9456	symbol	H. sapiens	9456	H. sapiens	HOMER1	homer scaffold protein 1	GO:0007206 phospholipase C-activating G protein-coupled glutamate receptor signaling pathway;GO:0048148 behavioral response to cocaine;GO:1902950 regulation of dendritic spine maintenance		Predicted intracellular proteins	Cytosol (Approved)			(M5937)HALLMARK GLYCOLYSIS	0	1	1	1	1	0	0	0	0	0	0	1	0	0	0	0	0	0	0	0
TPM4	7171	symbol	H. sapiens	7171	H. sapiens	TPM4	tropomyosin 4	GO:0030049 muscle filament sliding;GO:0033275 actin-myosin filament sliding;GO:0070252 actin-mediated cell contraction		Cancer-related genes; Predicted intracellular proteins	Actin filaments (Approved); Additional: Cytosol	Phenethyl Isothiocyanate		(M5930)HALLMARK EPITHELIAL MESENCHYMAL TRANSITION	0	0	1	0	0	1	0	0	0	0	0	0	0	0	0	0	0	0	0	0
DPP6	1804	symbol	H. sapiens	1804	H. sapiens	DPP6	dipeptidyl peptidase like 6	GO:1901379 regulation of potassium ion transmembrane transport;GO:0043266 regulation of potassium ion transport;GO:0071804 cellular potassium ion transport		Disease related genes; Enzymes; Peptidases:Serine-type peptidases; Potential drug targets; Transporters:Accessory Factors Involved in Transport					0	0	1	0	0	0	1	0	0	0	0	0	0	0	0	0	0	0	0	0
PSMC1	5700	symbol	H. sapiens	5700	H. sapiens	PSMC1	proteasome 26S subunit, ATPase 1	GO:0006521 regulation of cellular amino acid metabolic process;GO:1902036 regulation of hematopoietic stem cell differentiation;GO:0002479 antigen processing and presentation of exogenous peptide antigen via MHC class I, TAP-dependent		Predicted intracellular proteins	Cytosol;Nucleoplasm (Enhanced)				0	0	0	1	0	0	0	0	0	0	0	0	1	0	0	0	0	0	0	1
NEGR1	257194	symbol	H. sapiens	257194	H. sapiens	NEGR1	neuronal growth regulator 1	GO:0007631 feeding behavior;GO:0007626 locomotory behavior;GO:0010976 positive regulation of neuron projection development			Actin filaments;Cytosol;Vesicles (Approved)			(M5915)HALLMARK APICAL JUNCTION	0	1	0	0	0	0	0	0	0	0	0	0	0	0	0	0	0	0	0	0
TOP2B	7155	symbol	H. sapiens	7155	H. sapiens	TOP2B	DNA topoisomerase II beta	GO:0045870 positive regulation of single stranded viral RNA replication via double stranded DNA intermediate;GO:0006265 DNA topological change;GO:0000712 resolution of meiotic recombination intermediates		Disease related genes; Enzymes; FDA approved drug targets:Small molecule drugs; ENZYME proteins:Isomerase; Predicted intracellular proteins	Nucleoplasm (Enhanced)	Dexrazoxane; Daunorubicin; Etoposide; Phosphoaminophosphonic Acid-Adenylate Ester; Amonafide; Technetium Tc-99m ciprofloxacin; ZEN-012; Becatecarin; Declopramide; 3'-THIO-THYMIDINE-5'-PHOSPHATE			0	1	0	1	0	0	0	0	0	0	0	0	0	0	0	0	0	0	0	0
RAC1	5879	symbol	H. sapiens	5879	H. sapiens	RAC1	Rac family small GTPase 1	GO:0032707 negative regulation of interleukin-23 production;GO:0032627 interleukin-23 production;GO:0032667 regulation of interleukin-23 production		Cancer-related genes:Mutational cancer driver genes; Cancer-related genes:Mutated cancer genes; RAS pathway related proteins; Cancer-related genes:Candidate cancer biomarkers; Predicted intracellular proteins	Cytosol;Nucleoplasm (Approved); Additional: Nucleoli	Azathioprine; Guanosine-5'-Diphosphate	(M120)PID ARF6 DOWNSTREAM PATHWAY; (M243)PID ARF 3PATHWAY; (M273)PID EPHA2 FWD PATHWAY	(M5923)HALLMARK PI3K AKT MTOR SIGNALING; (M5946)HALLMARK COAGULATION	1	1	1	1	1	1	0	0	0	1	0	0	0	1	1	0	0	0	1	1
CCNY	219771	symbol	H. sapiens	219771	H. sapiens	CCNY	cyclin Y	GO:0045737 positive regulation of cyclin-dependent protein serine/threonine kinase activity;GO:1904031 positive regulation of cyclin-dependent protein kinase activity;GO:0000079 regulation of cyclin-dependent protein serine/threonine kinase activity		Predicted intracellular proteins					0	0	0	1	0	0	0	0	0	0	0	0	0	0	0	0	0	0	0	0
UCHL3	7347	symbol	H. sapiens	7347	H. sapiens	UCHL3	ubiquitin C-terminal hydrolase L3	GO:0016579 protein deubiquitination;GO:0070646 protein modification by small protein removal;GO:0018215 protein phosphopantetheinylation		Peptidases:Cysteine-type peptidases; Enzymes; Predicted intracellular proteins; ENZYME proteins:Hydrolases	Cytosol;Nucleoplasm (Supported)				0	0	0	1	0	0	0	0	0	0	0	0	0	0	0	0	0	0	0	0
LSAMP	4045	symbol	H. sapiens	4045	H. sapiens	LSAMP	limbic system associated membrane protein	GO:0007155 cell adhesion;GO:0022610 biological adhesion;GO:0007399 nervous system development		Predicted intracellular proteins	Cytosol (Enhanced)				0	0	0	0	0	0	0	0	0	0	0	0	0	0	0	0	0	0	0	0
PPFIA2	8499	symbol	H. sapiens	8499	H. sapiens	PPFIA2	PTPRF interacting protein alpha 2	GO:0032253 dense core granule localization;GO:0099519 dense core granule cytoskeletal transport;GO:1901950 dense core granule transport		Predicted intracellular proteins					1	1	1	0	1	1	0	0	0	1	0	0	0	1	0	1	0	0	0	0
GNAZ	2781	symbol	H. sapiens	2781	H. sapiens	GNAZ	G protein subunit alpha z	GO:0007193 adenylate cyclase-inhibiting G protein-coupled receptor signaling pathway;GO:0007188 adenylate cyclase-modulating G protein-coupled receptor signaling pathway;GO:0006457 protein folding		Predicted intracellular proteins	Vesicles (Approved)		(M64)PID S1P S1P4 PATHWAY; (M103)PID S1P S1P1 PATHWAY; (M155)PID S1P META PATHWAY		0	0	1	0	0	0	0	0	0	0	0	0	0	0	0	0	0	0	0	1
BTN3A3	10384	symbol	H. sapiens	10384	H. sapiens	BTN3A3	butyrophilin subfamily 3 member A3	GO:0002456 T cell mediated immunity;GO:0050852 T cell receptor signaling pathway;GO:0050851 antigen receptor-mediated signaling pathway		Predicted intracellular proteins					0	0	0	1	0	0	0	0	0	0	0	0	0	0	0	0	0	0	0	0
PDE2A	5138	symbol	H. sapiens	5138	H. sapiens	PDE2A	phosphodiesterase 2A	GO:1904613 cellular response to 2,3,7,8-tetrachlorodibenzodioxine;GO:1904612 response to 2,3,7,8-tetrachlorodibenzodioxine;GO:0046069 cGMP catabolic process		Enzymes; FDA approved drug targets:Small molecule drugs; Predicted intracellular proteins; ENZYME proteins:Hydrolases	Cytosol (Supported)	Cyclic GMP; ND7001; Exisulind; 3-isobutyl-1-methyl-7H-xanthine; Tofisopam; Doxofylline			0	0	1	1	0	0	0	1	1	0	1	1	1	0	0	0	1	0	0	0
NT5DC1	221294	symbol	H. sapiens	221294	H. sapiens	NT5DC1	5'-nucleotidase domain containing 1	GO:0016311 dephosphorylation;GO:0006796 phosphate-containing compound metabolic process;GO:0006793 phosphorus metabolic process		Predicted intracellular proteins					0	0	1	0	0	0	0	0	0	0	0	0	0	0	0	0	0	0	0	0
CADM3	57863	symbol	H. sapiens	57863	H. sapiens	CADM3	cell adhesion molecule 3	GO:0007157 heterophilic cell-cell adhesion via plasma membrane cell adhesion molecules;GO:0034332 adherens junction organization;GO:0007156 homophilic cell adhesion via plasma membrane adhesion molecules		Predicted intracellular proteins	Cytosol (Approved)			(M5915)HALLMARK APICAL JUNCTION	0	0	0	0	0	1	0	0	0	0	0	0	0	1	0	0	0	0	0	0
RTN3	10313	symbol	H. sapiens	10313	H. sapiens	RTN3	reticulon 3	GO:0071787 endoplasmic reticulum tubular network formation;GO:0071786 endoplasmic reticulum tubular network organization;GO:1902430 negative regulation of amyloid-beta formation		Predicted intracellular proteins	Endoplasmic reticulum (Supported)			(M5905)HALLMARK ADIPOGENESIS	0	0	1	0	0	0	0	0	1	0	0	0	0	0	0	0	0	0	0	0
CADM1	23705	symbol	H. sapiens	23705	H. sapiens	CADM1	cell adhesion molecule 1	GO:0042271 susceptibility to natural killer cell mediated cytotoxicity;GO:0045954 positive regulation of natural killer cell mediated cytotoxicity;GO:0002717 positive regulation of natural killer cell mediated immunity		Predicted intracellular proteins	Cell Junctions (Supported)			(M5949)HALLMARK PEROXISOME; (M5930)HALLMARK EPITHELIAL MESENCHYMAL TRANSITION	0	0	0	1	0	1	0	0	0	0	0	0	0	1	0	0	0	0	0	0
ALCAM	214	symbol	H. sapiens	214	H. sapiens	ALCAM	activated leukocyte cell adhesion molecule	GO:0031290 retinal ganglion cell axon guidance;GO:0008045 motor neuron axon guidance;GO:0048846 axon extension involved in axon guidance		CD markers; Transporters:Accessory Factors Involved in Transport; Cancer-related genes:Candidate cancer biomarkers				(M5892)HALLMARK CHOLESTEROL HOMEOSTASIS; (M5947)HALLMARK IL2 STAT5 SIGNALING	0	1	0	1	0	0	0	0	0	0	0	0	0	0	0	0	0	0	0	1
ERC2	26059	symbol	H. sapiens	26059	H. sapiens	ERC2	ELKS/RAB6-interacting/CAST family member 2	GO:0048790 maintenance of presynaptic active zone structure;GO:1990709 presynaptic active zone organization;GO:0099558 maintenance of synapse structure		Predicted intracellular proteins					1	0	0	0	1	0	0	0	0	1	0	0	0	0	0	0	0	0	0	0
PTK2B	2185	symbol	H. sapiens	2185	H. sapiens	PTK2B	protein tyrosine kinase 2 beta	GO:2000537 regulation of B cell chemotaxis;GO:2000538 positive regulation of B cell chemotaxis;GO:0032960 regulation of inositol trisphosphate biosynthetic process	Tyr protein kinase family	Disease related genes; Kinases:Tyr protein kinases; ENZYME proteins:Transferases; Enzymes; FDA approved drug targets:Small molecule drugs; Predicted intracellular proteins	Cytosol;Plasma membrane (Supported)	Leflunomide; Genistein; 4-{[4-{[(1R,2R)-2-(dimethylamino)cyclopentyl]amino}-5-(trifluoromethyl)pyrimidin-2-yl]amino}-N-methylbenzenesulfonamide; Baricitinib; Fostamatinib	(M12771)SA PTEN PATHWAY; (M63)PID AVB3 OPN PATHWAY; (M275)PID ALPHA SYNUCLEIN PATHWAY	(M5908)HALLMARK ANDROGEN RESPONSE	1	1	1	1	1	1	0	1	0	1	0	1	0	1	1	0	1	0	0	0
RAD23A	5886	symbol	H. sapiens	5886	H. sapiens	RAD23A	RAD23 homolog A, nucleotide excision repair protein	GO:0045070 positive regulation of viral genome replication;GO:0031648 protein destabilization;GO:1903902 positive regulation of viral life cycle		Predicted intracellular proteins; Cancer-related genes:Candidate cancer biomarkers	Nucleoplasm (Enhanced); Additional: Cytosol			(M5945)HALLMARK HEME METABOLISM	0	0	0	1	0	0	0	0	0	0	0	0	0	0	0	0	0	0	0	0
UBQLN2	29978	symbol	H. sapiens	29978	H. sapiens	UBQLN2	ubiquilin 2	GO:1904021 negative regulation of G protein-coupled receptor internalization;GO:1904020 regulation of G protein-coupled receptor internalization;GO:1900186 negative regulation of clathrin-dependent endocytosis		Disease related genes; Predicted intracellular proteins	Cytosol (Supported); Additional: Plasma membrane				0	0	0	1	0	0	0	0	0	0	0	0	0	1	0	0	0	0	1	0
RBM4	5936	symbol	H. sapiens	5936	H. sapiens	RBM4	RNA binding motif protein 4	GO:0002192 IRES-dependent translational initiation of linear mRNA;GO:0110017 cap-independent translational initiation of linear mRNA;GO:0097167 circadian regulation of translation		Predicted intracellular proteins	Nucleoplasm (Approved); Additional: Cytosol			(M5953)HALLMARK KRAS SIGNALING UP	0	0	0	1	0	0	0	0	0	0	0	0	0	0	0	1	0	0	0	0
NCAM2	4685	symbol	H. sapiens	4685	H. sapiens	NCAM2	neural cell adhesion molecule 2	GO:0007158 neuron cell-cell adhesion;GO:0007413 axonal fasciculation;GO:0106030 neuron projection fasciculation			Nuclear bodies;Plasma membrane (Supported)				0	1	0	0	0	0	0	0	0	0	0	0	0	0	0	0	0	0	0	0
VBP1	7411	symbol	H. sapiens	7411	H. sapiens	VBP1	VHL binding protein 1	GO:0007021 tubulin complex assembly;GO:1905907 negative regulation of amyloid fibril formation;GO:1905906 regulation of amyloid fibril formation		Predicted intracellular proteins	Cytosol (Supported); Additional: Vesicles			(M5926)HALLMARK MYC TARGETS V1	0	0	0	0	0	1	0	0	0	0	0	0	0	0	0	0	0	0	1	1
ICAM5	7087	symbol	H. sapiens	7087	H. sapiens	ICAM5	intercellular adhesion molecule 5	GO:0006909 phagocytosis;GO:0030198 extracellular matrix organization;GO:0043062 extracellular structure organization		Predicted intracellular proteins				(M5915)HALLMARK APICAL JUNCTION	0	0	0	1	0	0	0	0	0	0	0	0	0	1	0	0	0	0	0	0
DUT	1854	symbol	H. sapiens	1854	H. sapiens	DUT	deoxyuridine triphosphatase	GO:0046080 dUTP metabolic process;GO:0046081 dUTP catabolic process;GO:0006226 dUMP biosynthetic process		Enzymes; Predicted intracellular proteins; ENZYME proteins:Hydrolases	Nucleoplasm (Supported)	Deoxyuridine-5'-Diphosphate; 1-{(2S,5S)-4-FLUORO-5-[(TRITYLOXY)METHYL]TETRAHYDROFURAN-2-YL}PYRIMIDINE-2,4(1H,3H)-DIONE		(M5898)HALLMARK DNA REPAIR; (M5925)HALLMARK E2F TARGETS; (M5926)HALLMARK MYC TARGETS V1	0	0	0	0	0	1	0	1	0	0	1	0	1	0	0	0	0	0	0	0
REEP5	7905	symbol	H. sapiens	7905	H. sapiens	REEP5	receptor accessory protein 5	GO:0007029 endoplasmic reticulum organization;GO:0032386 regulation of intracellular transport;GO:0010256 endomembrane system organization			Endoplasmic reticulum (Supported)			(M5905)HALLMARK ADIPOGENESIS	0	0	0	0	0	0	0	0	0	0	0	0	0	0	0	1	0	0	0	0
CACNA2D1	781	symbol	H. sapiens	781	H. sapiens	CACNA2D1	calcium voltage-gated channel auxiliary subunit alpha2delta 1	GO:0086048 membrane depolarization during bundle of His cell action potential;GO:1901843 positive regulation of high voltage-gated calcium channel activity;GO:0086028 bundle of His cell to Purkinje myocyte signaling		Transporters:Accessory Factors Involved in Transport; FDA approved drug targets:Small molecule drugs; Predicted intracellular proteins		Pregabalin; Isradipine; Ibutilide; Nisoldipine; Nicardipine; Gabapentin; Felodipine; Nitrendipine; Cyclandelate; Nilvadipine; Gabapentin enacarbil			0	0	1	0	0	1	0	0	0	0	0	0	0	0	1	0	1	0	0	0
DNAJC5	80331	symbol	H. sapiens	80331	H. sapiens	DNAJC5	DnaJ heat shock protein family (Hsp40) member C5	GO:0061077 chaperone-mediated protein folding;GO:0098693 regulation of synaptic vesicle cycle;GO:0016079 synaptic vesicle exocytosis		Disease related genes	Golgi apparatus;Plasma membrane (Supported); Additional: Vesicles				1	0	1	0	1	0	0	0	0	1	0	0	0	0	0	0	0	0	0	1
BCAT1	586	symbol	H. sapiens	586	H. sapiens	BCAT1	branched chain amino acid transaminase 1	GO:0009098 leucine biosynthetic process;GO:0009099 valine biosynthetic process;GO:0009082 branched-chain amino acid biosynthetic process		ENZYME proteins:Transferases; Enzymes; Predicted intracellular proteins		Pyridoxal phosphate; Glutamic acid; Leucine; Valine; Isoleucine; N'-(5-CHLOROBENZOFURAN-2-CARBONYL)-2-(TRIFLUOROMETHYL)BENZENESULFONOHYDRAZIDE	(M66)PID MYC ACTIV PATHWAY	(M5924)HALLMARK MTORC1 SIGNALING; (M5934)HALLMARK XENOBIOTIC METABOLISM; (M5950)HALLMARK ALLOGRAFT REJECTION	0	0	0	0	0	0	0	0	0	0	0	0	0	0	0	0	0	0	0	0
PLCD1	5333	symbol	H. sapiens	5333	H. sapiens	PLCD1	phospholipase C delta 1	GO:0043647 inositol phosphate metabolic process;GO:0019751 polyol metabolic process;GO:0046488 phosphatidylinositol metabolic process		ENZYME proteins:Hydrolases; Disease related genes; Enzymes; Potential drug targets; Predicted intracellular proteins	Microtubules (Approved)	1D-myo-inositol 1,4,5-trisphosphate; Inositol 2,4,5-trisphosphate			0	0	1	0	0	0	0	0	0	0	0	0	0	0	0	0	0	0	0	0
LHPP	64077	symbol	H. sapiens	64077	H. sapiens	LHPP	phospholysine phosphohistidine inorganic pyrophosphate phosphatase	GO:0009168 purine ribonucleoside monophosphate biosynthetic process;GO:0009127 purine nucleoside monophosphate biosynthetic process;GO:0009156 ribonucleoside monophosphate biosynthetic process		Enzymes; Predicted intracellular proteins; ENZYME proteins:Hydrolases	Cytosol;Nuclear speckles (Supported)			(M5937)HALLMARK GLYCOLYSIS	0	0	1	0	0	0	0	1	0	0	0	0	1	0	0	0	0	0	0	0
SELENBP1	8991	symbol	H. sapiens	8991	H. sapiens	SELENBP1	selenium binding protein 1	GO:0015031 protein transport;GO:0015833 peptide transport;GO:0042886 amide transport		ENZYME proteins:Oxidoreductases; Disease related genes; Enzymes; Potential drug targets; Predicted intracellular proteins	Nucleoli (Supported)			(M5891)HALLMARK HYPOXIA; (M5945)HALLMARK HEME METABOLISM	0	0	0	0	0	0	0	0	0	0	0	0	0	0	0	0	0	0	0	0
CRYL1	51084	symbol	H. sapiens	51084	H. sapiens	CRYL1	crystallin lambda 1	GO:0006064 glucuronate catabolic process;GO:0019640 glucuronate catabolic process to xylulose 5-phosphate;GO:0051167 xylulose 5-phosphate metabolic process		Enzymes; ENZYME proteins:Oxidoreductases; Predicted intracellular proteins	Nucleoli;Nucleoplasm (Approved); Additional: Golgi apparatus;Plasma membrane				0	0	0	0	0	0	0	1	0	0	1	0	0	0	0	0	0	0	0	0
ILVBL	10994	symbol	H. sapiens	10994	H. sapiens	ILVBL	ilvB acetolactate synthase like	GO:0009099 valine biosynthetic process;GO:0009097 isoleucine biosynthetic process;GO:0009082 branched-chain amino acid biosynthetic process		Predicted intracellular proteins	Golgi apparatus;Vesicles (Approved)			(M5891)HALLMARK HYPOXIA	0	0	0	0	0	0	0	1	0	0	0	0	0	0	0	0	0	0	0	0
C16orf62	57020	gene_synonym	H. sapiens	57020	H. sapiens	VPS35L	VPS35 endosomal protein sorting factor like	GO:1990126 retrograde transport, endosome to plasma membrane;GO:0032456 endocytic recycling;GO:0006893 Golgi to plasma membrane transport		Predicted intracellular proteins	Mitochondria (Approved)				1	0	0	0	0	0	0	0	0	0	0	0	0	0	0	0	0	0	0	0
PPM1F	9647	symbol	H. sapiens	9647	H. sapiens	PPM1F	protein phosphatase, Mg2+/Mn2+ dependent 1F	GO:0016576 histone dephosphorylation;GO:0044387 negative regulation of protein kinase activity by regulation of protein phosphorylation;GO:2000048 negative regulation of cell-cell adhesion mediated by cadherin		Enzymes; Predicted intracellular proteins; ENZYME proteins:Hydrolases	Nucleoplasm (Approved); Additional: Plasma membrane				0	1	1	1	0	1	0	0	0	1	0	0	0	0	0	0	0	0	0	0
ACAT2	39	symbol	H. sapiens	39	H. sapiens	ACAT2	acetyl-CoA acetyltransferase 2	GO:0006695 cholesterol biosynthetic process;GO:1902653 secondary alcohol biosynthetic process;GO:0006635 fatty acid beta-oxidation		ENZYME proteins:Transferases; Enzymes; Predicted intracellular proteins	Cytosol (Approved); Additional: Nucleoplasm	S-Hydroxycysteine; Coenzyme A		(M5892)HALLMARK CHOLESTEROL HOMEOSTASIS; (M5935)HALLMARK FATTY ACID METABOLISM	0	0	0	0	0	0	0	1	0	0	0	0	0	0	0	0	0	0	0	0
FAH	2184	symbol	H. sapiens	2184	H. sapiens	FAH	fumarylacetoacetate hydrolase	GO:1901999 homogentisate metabolic process;GO:1902000 homogentisate catabolic process;GO:0006572 tyrosine catabolic process		ENZYME proteins:Hydrolases; Disease related genes; Enzymes; Potential drug targets; Predicted intracellular proteins	Cytosol (Approved); Additional: Nucleoplasm	Fumaric Acid; Acetoacetic acid; 4-[Hydroxy-[Methyl-Phosphinoyl]]-3-Oxo-Butanoic Acid		(M5947)HALLMARK IL2 STAT5 SIGNALING; (M5905)HALLMARK ADIPOGENESIS; (M5934)HALLMARK XENOBIOTIC METABOLISM	0	0	0	0	0	0	0	0	0	0	0	0	1	0	0	0	0	0	0	0
PSAT1	29968	symbol	H. sapiens	29968	H. sapiens	PSAT1	phosphoserine aminotransferase 1	GO:0008614 pyridoxine metabolic process;GO:0008615 pyridoxine biosynthetic process;GO:0042819 vitamin B6 biosynthetic process		Disease related genes; ENZYME proteins:Transferases; Enzymes; Potential drug targets; Predicted intracellular proteins	Cytosol (Enhanced)	Pyridoxal phosphate; Glutamic acid		(M5922)HALLMARK UNFOLDED PROTEIN RESPONSE; (M5924)HALLMARK MTORC1 SIGNALING	0	0	0	0	0	0	0	0	0	0	0	0	0	0	0	0	0	0	0	0
SLC25A11	8402	symbol	H. sapiens	8402	H. sapiens	SLC25A11	solute carrier family 25 member 11	GO:0015709 thiosulfate transport;GO:0015729 oxaloacetate transport;GO:0015743 malate transport		Transporters:Electrochemical Potential-driven transporters				(M5936)HALLMARK OXIDATIVE PHOSPHORYLATION	0	0	0	0	1	0	0	0	0	0	1	0	0	0	1	0	0	1	0	0
EZR	7430	symbol	H. sapiens	7430	H. sapiens	EZR	ezrin	GO:0043622 cortical microtubule organization;GO:0001951 intestinal D-glucose absorption;GO:1902896 terminal web assembly		Predicted intracellular proteins; Cancer-related genes:Mutated cancer genes; Cancer-related genes:Candidate cancer biomarkers	Plasma membrane (Enhanced)		(M240)PID SYNDECAN 2 PATHWAY; (M94)PID FAS PATHWAY; (M12)PID RHOA PATHWAY	(M5893)HALLMARK MITOTIC SPINDLE	0	1	1	1	1	1	1	0	0	1	0	0	0	1	1	1	1	0	0	1
ESD	2098	symbol	H. sapiens	2098	H. sapiens	ESD	esterase D	GO:0046294 formaldehyde catabolic process;GO:0046292 formaldehyde metabolic process;GO:0110095 cellular detoxification of aldehyde		Enzymes; Predicted intracellular proteins; ENZYME proteins:Hydrolases	Golgi apparatus (Approved); Additional: Cytosol;Nucleoplasm	Glutathione			0	0	0	0	0	0	0	0	0	0	0	1	0	0	0	0	0	0	0	0
NUDT2	318	symbol	H. sapiens	318	H. sapiens	NUDT2	nudix hydrolase 2	GO:0006167 AMP biosynthetic process;GO:0046033 AMP metabolic process;GO:0006754 ATP biosynthetic process		Enzymes; Predicted intracellular proteins; ENZYME proteins:Hydrolases	Nucleoplasm (Approved)				0	0	0	1	0	0	0	1	0	0	0	0	1	0	0	0	0	0	0	0
PHPT1	29085	symbol	H. sapiens	29085	H. sapiens	PHPT1	phosphohistidine phosphatase 1	GO:0035971 peptidyl-histidine dephosphorylation;GO:2000983 regulation of ATP citrate synthase activity;GO:2000984 negative regulation of ATP citrate synthase activity		Enzymes; Predicted intracellular proteins; ENZYME proteins:Hydrolases	Cytosol (Approved); Additional: Nuclear bodies;Nucleoplasm;Plasma membrane				0	0	1	1	0	1	0	0	0	1	0	0	0	0	0	0	0	0	0	0
PDE12	201626	symbol	H. sapiens	201626	H. sapiens	PDE12	phosphodiesterase 12	GO:0000958 mitochondrial mRNA catabolic process;GO:0000957 mitochondrial RNA catabolic process;GO:0090324 negative regulation of oxidative phosphorylation		Enzymes; Predicted intracellular proteins; ENZYME proteins:Hydrolases					0	0	0	1	0	0	0	1	0	0	0	0	1	0	0	0	1	0	0	0
RPL9	6133	symbol	H. sapiens	6133	H. sapiens	RPL9	ribosomal protein L9	GO:0002181 cytoplasmic translation;GO:0006614 SRP-dependent cotranslational protein targeting to membrane;GO:0006613 cotranslational protein targeting to membrane		Ribosomal proteins; Predicted intracellular proteins	Cytosol;Endoplasmic reticulum (Supported); Additional: Nucleoli			(M5950)HALLMARK ALLOGRAFT REJECTION	0	0	0	1	0	0	1	0	0	0	0	0	1	0	0	0	0	0	0	0
PADI2	11240	symbol	H. sapiens	11240	H. sapiens	PADI2	peptidyl arginine deiminase 2	GO:0010848 regulation of chromatin disassembly;GO:0036413 histone H3-R26 citrullination;GO:1901624 negative regulation of lymphocyte chemotaxis		Enzymes; Predicted intracellular proteins; ENZYME proteins:Hydrolases		Citrulline			1	1	1	0	0	0	0	0	0	0	0	1	0	0	0	0	1	0	0	0
ALAD	210	symbol	H. sapiens	210	H. sapiens	ALAD	aminolevulinate dehydratase	GO:0010266 response to vitamin B1;GO:0070541 response to platinum ion;GO:0071284 cellular response to lead ion		Disease related genes; Enzymes; FDA approved drug targets:Small molecule drugs; ENZYME proteins:Lyases; Predicted intracellular proteins		Aminolevulinic acid; Delta-Amino Valeric Acid; Laevulinic Acid; 4-Oxosebacic Acid; Porphobilinogen; 3-(2-Aminoethyl)-4-(Aminomethyl)Heptanedioic Acid; 4,7-Dioxosebacic Acid; 5-hydroxyvaleric acid		(M5935)HALLMARK FATTY ACID METABOLISM; (M5945)HALLMARK HEME METABOLISM	1	0	0	1	0	0	0	0	0	0	0	1	0	0	0	0	0	0	0	0
KIAA1033	23325	gene_synonym	H. sapiens	23325	H. sapiens	WASHC4	WASH complex subunit 4	GO:0007032 endosome organization;GO:0016197 endosomal transport;GO:0016050 vesicle organization		Disease related genes; Predicted intracellular proteins	Nucleoplasm (Enhanced)				0	0	0	0	0	0	0	0	0	0	0	0	0	0	0	0	0	0	0	0
WDR61	80349	symbol	H. sapiens	80349	H. sapiens	WDR61	WD repeat domain 61	GO:2001162 positive regulation of histone H3-K79 methylation;GO:2001160 regulation of histone H3-K79 methylation;GO:0034729 histone H3-K79 methylation		Predicted intracellular proteins	Cytosol;Nucleoplasm (Enhanced)				0	0	0	1	0	1	0	0	0	0	0	0	1	0	0	0	0	0	0	0
CAPNS1	826	symbol	H. sapiens	826	H. sapiens	CAPNS1	calpain small subunit 1	GO:0022617 extracellular matrix disassembly;GO:0070268 cornification;GO:0016241 regulation of macroautophagy		Predicted intracellular proteins	Cytosol;Nucleoplasm (Approved)	PD150606			0	0	0	0	0	0	0	0	0	0	0	0	0	0	0	0	0	0	0	0
PFKFB2	5208	symbol	H. sapiens	5208	H. sapiens	PFKFB2	6-phosphofructo-2-kinase/fructose-2,6-biphosphatase 2	GO:0033133 positive regulation of glucokinase activity;GO:0006003 fructose 2,6-bisphosphate metabolic process;GO:1903301 positive regulation of hexokinase activity		ENZYME proteins:Transferases; Enzymes; Predicted intracellular proteins; ENZYME proteins:Hydrolases	Nucleoplasm (Enhanced)				0	0	1	1	0	0	0	1	0	1	1	0	1	0	0	0	0	0	0	0
PTGR2	145482	symbol	H. sapiens	145482	H. sapiens	PTGR2	prostaglandin reductase 2	GO:0006692 prostanoid metabolic process;GO:0006693 prostaglandin metabolic process;GO:0033559 unsaturated fatty acid metabolic process		Enzymes; ENZYME proteins:Oxidoreductases; Predicted intracellular proteins	Vesicles (Approved)	Indomethacin; (5E,13E)-11-HYDROXY-9,15-DIOXOPROSTA-5,13-DIEN-1-OIC ACID			0	0	0	0	0	0	0	0	0	0	0	0	0	0	0	0	0	0	0	0
UBB	7314	symbol	H. sapiens	7314	H. sapiens	UBB	ubiquitin B	GO:0021886 hypothalamus gonadotrophin-releasing hormone neuron differentiation;GO:0021888 hypothalamus gonadotrophin-releasing hormone neuron development;GO:1902527 positive regulation of protein monoubiquitination		Predicted intracellular proteins		(4s)-5-Fluoro-L-Leucine			0	1	1	1	1	0	1	0	0	0	1	0	1	0	0	0	0	1	0	0
RPS27A	6233	symbol	H. sapiens	6233	H. sapiens	RPS27A	ribosomal protein S27a	GO:0042276 error-prone translesion synthesis;GO:0000717 nucleotide-excision repair, DNA duplex unwinding;GO:0070987 error-free translesion synthesis		Ribosomal proteins; Predicted intracellular proteins	Cytosol;Endoplasmic reticulum;Nucleoli (Supported)				0	0	0	1	0	0	1	0	0	0	1	0	1	0	0	0	0	1	0	0
UBC	7316	symbol	H. sapiens	7316	H. sapiens	UBC	ubiquitin C	GO:0042276 error-prone translesion synthesis;GO:0000717 nucleotide-excision repair, DNA duplex unwinding;GO:0070987 error-free translesion synthesis		Predicted intracellular proteins		N-Formylmethionine		(M5905)HALLMARK ADIPOGENESIS	0	0	0	1	0	0	1	0	0	0	1	0	1	0	0	0	0	1	0	0
UBA52	7311	symbol	H. sapiens	7311	H. sapiens	UBA52	ubiquitin A-52 residue ribosomal protein fusion product 1	GO:0042276 error-prone translesion synthesis;GO:0000717 nucleotide-excision repair, DNA duplex unwinding;GO:0070987 error-free translesion synthesis		Ribosomal proteins; Predicted intracellular proteins	Cytosol;Endoplasmic reticulum (Approved); Additional: Nucleoplasm;Plasma membrane				0	0	0	1	0	0	1	0	0	0	1	0	1	0	0	0	0	1	0	0
SLC25A4	291	symbol	H. sapiens	291	H. sapiens	SLC25A4	solute carrier family 25 member 4	GO:0015853 adenine transport;GO:0140021 mitochondrial ADP transmembrane transport;GO:1990544 mitochondrial ATP transmembrane transport		Disease related genes; Transporters:Electrochemical Potential-driven transporters; FDA approved drug targets:Small molecule drugs	Mitochondria (Supported)	ATP; Clodronic acid; Etidronic acid; [3-(Dodecanoylamino)Propyl](Hydroxy)Dimethylammonium; Carboxyatractyloside; Tetrastearoyl cardiolipin; Di-Stearoyl-3-Sn-Phosphatidylcholine		(M5949)HALLMARK PEROXISOME; (M5941)HALLMARK UV RESPONSE UP; (M5936)HALLMARK OXIDATIVE PHOSPHORYLATION	0	0	1	1	1	0	0	1	1	1	0	0	0	0	0	0	0	1	0	0
AGRN	375790	symbol	H. sapiens	375790	H. sapiens	AGRN	agrin	GO:0045887 positive regulation of synaptic growth at neuromuscular junction;GO:0008582 regulation of synaptic growth at neuromuscular junction;GO:1904398 positive regulation of neuromuscular junction development		Disease related genes; Predicted secreted proteins; Predicted intracellular proteins	Cytosol (Approved); Additional: Plasma membrane		(M5887)NABA BASEMENT MEMBRANES; (M3008)NABA ECM GLYCOPROTEINS; (M5884)NABA CORE MATRISOME	(M5909)HALLMARK MYOGENESIS; (M5937)HALLMARK GLYCOLYSIS	0	1	0	1	0	1	1	1	0	0	1	0	0	0	0	0	1	0	0	0
ENO1	2023	symbol	H. sapiens	2023	H. sapiens	ENO1	enolase 1	GO:0032889 regulation of vacuole fusion, non-autophagic;GO:0042144 vacuole fusion, non-autophagic;GO:0097576 vacuole fusion		Predicted intracellular proteins; Enzymes; ENZYME proteins:Lyases; Cancer-related genes:Candidate cancer biomarkers	Cytosol;Plasma membrane (Enhanced)	Zinc; Copper; Artenimol; Zinc acetate; Zinc chloride; Zinc sulfate, unspecified form	(M17)PID NOTCH PATHWAY; (M255)PID HIF1 TFPATHWAY; (M66)PID MYC ACTIV PATHWAY	(M5891)HALLMARK HYPOXIA; (M5924)HALLMARK MTORC1 SIGNALING; (M5937)HALLMARK GLYCOLYSIS	0	1	1	1	1	0	0	1	0	0	1	0	1	0	0	0	0	0	0	0
MAPT	4137	symbol	H. sapiens	4137	H. sapiens	MAPT	microtubule associated protein tau	GO:1905687 regulation of diacylglycerol kinase activity;GO:1905689 positive regulation of diacylglycerol kinase activity;GO:1902988 neurofibrillary tangle assembly		Predicted intracellular proteins; Disease related genes; FDA approved drug targets:Small molecule drugs; Candidate cardiovascular disease genes	Plasma membrane (Supported); Additional: Nuclear speckles	Lansoprazole; Astemizole; Paclitaxel; Docetaxel; Flortaucipir F-18	(M209)PID P38 GAMMA DELTA PATHWAY; (M69)PID REELIN PATHWAY; (M87)PID LKB1 PATHWAY	(M5906)HALLMARK ESTROGEN RESPONSE EARLY; (M5907)HALLMARK ESTROGEN RESPONSE LATE	1	1	1	1	1	1	1	0	1	1	0	1	0	0	0	0	0	0	1	0
GPT	2875	symbol	H. sapiens	2875	H. sapiens	GPT	glutamic--pyruvic transaminase	GO:0042851 L-alanine metabolic process;GO:0042853 L-alanine catabolic process;GO:0006522 alanine metabolic process		ENZYME proteins:Transferases; Enzymes; Predicted intracellular proteins		Pyridoxal phosphate; Glutamic acid; Alanine; Phenelzine			0	0	0	0	0	0	0	0	0	0	0	0	0	0	0	0	1	0	0	0
DNPH1	10591	symbol	H. sapiens	10591	H. sapiens	DNPH1	2'-deoxynucleoside 5'-phosphate N-hydrolase 1	GO:0009159 deoxyribonucleoside monophosphate catabolic process;GO:0009162 deoxyribonucleoside monophosphate metabolic process;GO:0009125 nucleoside monophosphate catabolic process		Predicted intracellular proteins	Nucleoplasm (Approved); Additional: Cytosol				0	1	0	0	0	0	0	1	0	0	0	0	1	0	0	0	0	0	0	0
MAPRE1	22919	symbol	H. sapiens	22919	H. sapiens	MAPRE1	microtubule associated protein RP/EB family member 1	GO:1903031 regulation of microtubule plus-end binding;GO:1903033 positive regulation of microtubule plus-end binding;GO:1904825 protein localization to microtubule plus-end		Predicted intracellular proteins	Centriolar satellite;Cytosol (Enhanced)		(M266)PID NCADHERIN PATHWAY	(M5893)HALLMARK MITOTIC SPINDLE	0	0	0	1	1	1	0	1	0	0	0	0	0	0	0	0	0	0	1	1
CAPG	822	symbol	H. sapiens	822	H. sapiens	CAPG	capping actin protein, gelsolin like	GO:0071803 positive regulation of podosome assembly;GO:0071801 regulation of podosome assembly;GO:0051014 actin filament severing		Predicted intracellular proteins	Nucleoplasm (Enhanced)			(M5947)HALLMARK IL2 STAT5 SIGNALING; (M5930)HALLMARK EPITHELIAL MESENCHYMAL TRANSITION; (M5950)HALLMARK ALLOGRAFT REJECTION	0	0	0	0	0	1	0	0	0	0	0	0	0	0	0	0	0	0	1	0
MPC2	25874	symbol	H. sapiens	25874	H. sapiens	MPC2	mitochondrial pyruvate carrier 2	GO:0006850 mitochondrial pyruvate transmembrane transport;GO:0061732 mitochondrial acetyl-CoA biosynthetic process from pyruvate;GO:0006848 pyruvate transport		Transporters:Electrochemical Potential-driven transporters; Predicted intracellular proteins				(M5898)HALLMARK DNA REPAIR	0	0	0	0	1	0	0	1	0	1	0	0	0	0	0	0	0	0	0	0
TRPV1	7442	symbol	H. sapiens	7442	H. sapiens	TRPV1	transient receptor potential cation channel subfamily V member 1	GO:1901594 response to capsazepine;GO:0050955 thermoception;GO:0071468 cellular response to acidic pH		Transporters:Transporter channels and pores; Voltage-gated ion channels:Transient Receptor Potential Channels; FDA approved drug targets:Small molecule drugs; FDA approved drug targets:Biotech drugs		alpha-Linolenic acid; Icosapent; Aspartame; Tramadol; Acetaminophen; Camphor; Ricinoleic Acid; Resiniferatoxin; Capsaicin; Cannabidiol; Zucapsaicin; Propacetamol; Capsicum oleoresin; Nonivamide; (S)-camphor; Medical Cannabis; Nabiximols; Cannabidivarin	(M270)PID MAPK TRK PATHWAY; (M271)PID PI3K PLC TRK PATHWAY		0	0	1	1	1	0	0	0	0	0	0	0	0	0	0	0	1	0	0	0
SHPK	23729	symbol	H. sapiens	23729	H. sapiens	SHPK	sedoheptulokinase	GO:0035963 cellular response to interleukin-13;GO:0035962 response to interleukin-13;GO:0009052 pentose-phosphate shunt, non-oxidative branch		Disease related genes; ENZYME proteins:Transferases; Enzymes; Potential drug targets; Predicted intracellular proteins	Nuclear speckles;Nucleoplasm (Approved)				1	0	0	0	0	0	0	1	0	0	1	0	0	0	0	0	0	0	0	0
NBEA	26960	symbol	H. sapiens	26960	H. sapiens	NBEA	neurobeachin	GO:0008104 protein localization;GO:0033036 macromolecule localization;GO:0051179 localization		Predicted intracellular proteins	Golgi apparatus (Supported); Additional: Cytosol;Nucleoli;Nucleoplasm				0	0	1	1	0	0	0	0	0	0	0	0	0	0	0	0	0	0	0	1
BDH2	56898	symbol	H. sapiens	56898	H. sapiens	BDH2	3-hydroxybutyrate dehydrogenase 2	GO:0009237 siderophore metabolic process;GO:0019290 siderophore biosynthetic process;GO:0046951 ketone body biosynthetic process		Enzymes; ENZYME proteins:Oxidoreductases; Predicted intracellular proteins	Cytosol (Supported)			(M5936)HALLMARK OXIDATIVE PHOSPHORYLATION	0	0	1	0	0	0	0	1	0	0	0	0	0	0	0	0	0	0	0	0
SV2A	9900	symbol	H. sapiens	9900	H. sapiens	SV2A	synaptic vesicle glycoprotein 2A	GO:0014052 regulation of gamma-aminobutyric acid secretion;GO:0014051 gamma-aminobutyric acid secretion;GO:0015812 gamma-aminobutyric acid transport		FDA approved drug targets:Small molecule drugs	Cytosol (Approved)	Levetiracetam; Brivaracetam; Seletracetam			1	0	1	0	1	0	0	0	0	1	0	0	0	0	0	0	0	0	0	0
SLC3A2	6520	symbol	H. sapiens	6520	H. sapiens	SLC3A2	solute carrier family 3 member 2	GO:0015823 phenylalanine transport;GO:1904273 L-alanine import across plasma membrane;GO:1904557 L-alanine transmembrane transport		Predicted intracellular proteins; CD markers; Transporters:Accessory Factors Involved in Transport; Cancer-related genes:Candidate cancer biomarkers	Plasma membrane (Supported); Additional: Nucleoplasm		(M60)PID NFAT TFPATHWAY	(M5939)HALLMARK P53 PATHWAY	0	0	1	1	1	0	0	0	0	0	0	0	0	0	0	0	0	0	0	0
CUTA	51596	symbol	H. sapiens	51596	H. sapiens	CUTA	cutA divalent cation tolerance homolog	GO:0010038 response to metal ion;GO:0010035 response to inorganic substance;GO:0008104 protein localization		Predicted secreted proteins; Predicted intracellular proteins	Focal adhesion sites;Plasma membrane (Approved)				0	0	0	0	0	0	0	0	0	0	0	1	0	0	0	0	0	0	0	0
USP9X	8239	symbol	H. sapiens	8239	H. sapiens	USP9X	ubiquitin specific peptidase 9 X-linked	GO:1901537 positive regulation of DNA demethylation;GO:0071947 protein deubiquitination involved in ubiquitin-dependent protein catabolic process;GO:1901535 regulation of DNA demethylation		ENZYME proteins:Hydrolases; Disease related genes; Enzymes; Peptidases:Cysteine-type peptidases; Potential drug targets; Predicted intracellular proteins	Vesicles (Uncertain)				0	1	0	1	0	0	1	0	0	0	0	0	0	0	0	0	0	1	0	0
MTSS1L	92154	gene_synonym	H. sapiens	92154	H. sapiens	MTSS2	MTSS I-BAR domain containing 2	GO:0036120 cellular response to platelet-derived growth factor stimulus;GO:0036119 response to platelet-derived growth factor;GO:0097178 ruffle assembly		Predicted intracellular proteins	Focal adhesion sites (Supported)				0	0	0	1	0	0	0	0	0	0	0	0	0	0	0	0	0	0	0	0
SERPINB6	5269	symbol	H. sapiens	5269	H. sapiens	SERPINB6	serpin family B member 6	GO:0071470 cellular response to osmotic stress;GO:0006970 response to osmotic stress;GO:0007605 sensory perception of sound		Disease related genes; Predicted intracellular proteins	Centrosome (Approved)	Drotrecogin alfa	(M7955)SIG INSULIN RECEPTOR PATHWAY IN CARDIAC MYOCYTES; (M3468)NABA ECM REGULATORS; (M5885)NABA MATRISOME ASSOCIATED	(M5947)HALLMARK IL2 STAT5 SIGNALING	1	0	1	0	0	0	0	0	0	0	0	0	0	0	0	0	0	0	0	0
HEPACAM	220296	symbol	H. sapiens	220296	H. sapiens	HEPACAM	hepatic and glial cell adhesion molecule	GO:0007050 cell cycle arrest;GO:0045786 negative regulation of cell cycle;GO:0040008 regulation of growth		Disease related genes; Transporters:Accessory Factors Involved in Transport; Potential drug targets	Vesicles (Approved)				0	1	0	0	0	0	0	0	0	0	0	0	0	0	0	0	0	0	0	0
GSTP1	2950	symbol	H. sapiens	2950	H. sapiens	GSTP1	glutathione S-transferase pi 1	GO:0035732 nitric oxide storage;GO:0071460 cellular response to cell-matrix adhesion;GO:0033484 nitric oxide homeostasis		Predicted intracellular proteins; ENZYME proteins:Transferases; Enzymes; Cancer-related genes:Candidate cancer biomarkers	Cytosol;Mitochondria (Supported)	Glutathione; Troglitazone; Clozapine; Etacrynic acid; Clomipramine; (9R,10R)-9-(S-glutathionyl)-10-hydroxy-9,10-dihydrophenanthrene; S-Hydroxycysteine; Cibacron Blue; Glutathione sulfonic acid; Deoxycholic acid; S-(4-nitrobenzyl)glutathione; 2-(N-morpholino)ethanesulfonic acid; S-Hexylglutathione; Carbocisteine; Canfosfamide; Ezatiostat; Exisulind; S-NONYL-CYSTEINE; S-(4-BROMOBENZYL)CYSTEINE; Cur…			1	1	1	1	0	0	0	0	0	1	0	1	0	0	0	0	1	0	1	0
PNP	4860	symbol	H. sapiens	4860	H. sapiens	PNP	purine nucleoside phosphorylase	GO:0006148 inosine catabolic process;GO:0006738 nicotinamide riboside catabolic process;GO:0046495 nicotinamide riboside metabolic process		Disease related genes; ENZYME proteins:Transferases; Enzymes; FDA approved drug targets:Small molecule drugs; Predicted intracellular proteins	Cytosol (Supported)	Cladribine; Didanosine; 8-azaguanine; 2,6-Diamino-(S)-9-[2-(Phosphonomethoxy)Propyl]Purine; Immucillin-G; Guanine; 2-Amino-7-[2-(2-Hydroxy-1-Hydroxymethyl-Ethylamino)-Ethyl]-1,7-Dihydro-Purin-6-One; Peldesine; 9-deazainosine; Guanosine; Ribose-1-Phosphate; (3R,4R)-3-Hydroxy-4-(hydroxymethyl)-1-[(4-oxo-4,4a,5,7a-tetrahydro-3H-pyrrolo[3,2-d]pyrimidin-7-yl)methyl]pyrrolidinium; 3'-deoxyguanosine; (2…		(M5898)HALLMARK DNA REPAIR; (M5947)HALLMARK IL2 STAT5 SIGNALING; (M5913)HALLMARK INTERFERON GAMMA RESPONSE	1	0	0	0	0	0	0	1	0	0	1	0	1	0	1	0	0	0	0	0
PSMD10	5716	symbol	H. sapiens	5716	H. sapiens	PSMD10	proteasome 26S subunit, non-ATPase 10	GO:0070682 proteasome regulatory particle assembly;GO:0007253 cytoplasmic sequestering of NF-kappaB;GO:0043248 proteasome assembly		Predicted intracellular proteins	Cytosol (Supported); Additional: Intermediate filaments				0	1	1	1	0	0	0	0	1	0	0	0	1	0	0	0	0	0	1	1
APRT	353	symbol	H. sapiens	353	H. sapiens	APRT	adenine phosphoribosyltransferase	GO:0044209 AMP salvage;GO:0006168 adenine salvage;GO:0046083 adenine metabolic process		Disease related genes; ENZYME proteins:Transferases; Enzymes; Potential drug targets; Predicted intracellular proteins	Cytosol;Nucleoplasm (Approved)	Adenine; 5-O-phosphono-alpha-D-ribofuranosyl diphosphate; 9-Deazaadenine; Citric acid		(M5898)HALLMARK DNA REPAIR	1	0	0	0	0	0	0	1	0	0	0	0	1	0	0	0	1	0	0	0
LSM2	57819	symbol	H. sapiens	57819	H. sapiens	LSM2	LSM2 homolog, U6 small nuclear RNA and mRNA degradation associated	GO:0000244 spliceosomal tri-snRNP complex assembly;GO:0043928 exonucleolytic nuclear-transcribed mRNA catabolic process involved in deadenylation-dependent decay;GO:0000291 nuclear-transcribed mRNA catabolic process, exonucleolytic		Predicted intracellular proteins	Nucleoplasm (Enhanced)			(M5926)HALLMARK MYC TARGETS V1	0	0	0	1	0	0	0	0	0	0	0	0	1	0	0	0	0	0	0	0
NES	10763	symbol	H. sapiens	10763	H. sapiens	NES	nestin	GO:0030842 regulation of intermediate filament depolymerization;GO:0030844 positive regulation of intermediate filament depolymerization;GO:0045106 intermediate filament depolymerization		Predicted intracellular proteins	Intermediate filaments (Enhanced)				0	1	0	0	0	1	0	0	0	0	0	0	0	0	0	0	0	0	0	0
ENAH	55740	symbol	H. sapiens	55740	H. sapiens	ENAH	ENAH actin regulator	GO:0070358 actin polymerization-dependent cell motility;GO:0008154 actin polymerization or depolymerization;GO:0007411 axon guidance		Predicted intracellular proteins	Cytosol;Focal adhesion sites;Plasma membrane (Enhanced)		(M156)PID ECADHERIN NASCENT AJ PATHWAY; (M232)PID ECADHERIN STABILIZATION PATHWAY; (M81)PID CDC42 PATHWAY		0	1	0	1	0	1	0	0	0	0	0	0	0	0	0	0	0	0	0	0
PRDX6	9588	symbol	H. sapiens	9588	H. sapiens	PRDX6	peroxiredoxin 6	GO:0048026 positive regulation of mRNA splicing, via spliceosome;GO:0042744 hydrogen peroxide catabolic process;GO:0046475 glycerophospholipid catabolic process		Enzymes; ENZYME proteins:Oxidoreductases; Predicted intracellular proteins; ENZYME proteins:Hydrolases	Cytosol;Plasma membrane (Supported)	2-(N-morpholino)ethanesulfonic acid; Copper		(M5938)HALLMARK REACTIVE OXYGEN SPECIES PATHWAY; (M5935)HALLMARK FATTY ACID METABOLISM	1	0	0	1	0	0	0	0	0	0	0	1	1	0	1	0	0	0	0	0
AK1	203	symbol	H. sapiens	203	H. sapiens	AK1	adenylate kinase 1	GO:0006172 ADP biosynthetic process;GO:0009180 purine ribonucleoside diphosphate biosynthetic process;GO:0009136 purine nucleoside diphosphate biosynthetic process		Disease related genes; ENZYME proteins:Transferases; Enzymes; Potential drug targets; Predicted intracellular proteins	Cytosol (Supported)	Bis(Adenosine)-5'-Pentaphosphate		(M5898)HALLMARK DNA REPAIR; (M5909)HALLMARK MYOGENESIS; (M5939)HALLMARK P53 PATHWAY	0	0	0	0	0	0	0	1	0	0	0	0	1	0	0	0	0	0	0	0
SH3BGRL3	83442	symbol	H. sapiens	83442	H. sapiens	SH3BGRL3	SH3 domain binding glutamate rich protein like 3			Predicted intracellular proteins	Nuclear bodies (Approved)				0	0	0	0	0	0	0	0	0	0	0	0	0	0	1	0	0	0	0	0
SLC25A3	5250	symbol	H. sapiens	5250	H. sapiens	SLC25A3	solute carrier family 25 member 3	GO:0035435 phosphate ion transmembrane transport;GO:0006817 phosphate ion transport;GO:0098661 inorganic anion transmembrane transport		Predicted intracellular proteins; Disease related genes; Transporters:Electrochemical Potential-driven transporters; Potential drug targets	Mitochondria (Supported)		(M195)PID CMYB PATHWAY	(M5926)HALLMARK MYC TARGETS V1; (M5936)HALLMARK OXIDATIVE PHOSPHORYLATION	0	0	0	0	1	0	0	1	0	0	0	0	0	0	0	0	0	0	0	0
PLIN3	10226	symbol	H. sapiens	10226	H. sapiens	PLIN3	perilipin 3	GO:0010890 positive regulation of sequestering of triglyceride;GO:0010889 regulation of sequestering of triglyceride;GO:0030730 sequestering of triglyceride		Predicted intracellular proteins; FDA approved drug targets:Biotech drugs	Lipid droplets (Enhanced)	Idursulfase; Galsulfase			0	0	1	1	0	0	0	0	0	0	0	0	0	0	0	0	0	0	0	1
COTL1	23406	symbol	H. sapiens	23406	H. sapiens	COTL1	coactosin like F-actin binding protein 1	GO:0050832 defense response to fungus;GO:0009620 response to fungus;GO:0030833 regulation of actin filament polymerization		Predicted intracellular proteins	Cytosol (Supported)				1	0	0	0	0	1	0	0	0	0	0	0	0	0	0	0	0	0	0	0
PLCD3	113026	symbol	H. sapiens	113026	H. sapiens	PLCD3	phospholipase C delta 3	GO:0060716 labyrinthine layer blood vessel development;GO:0060674 placenta blood vessel development;GO:0060711 labyrinthine layer development		Enzymes; Predicted intracellular proteins; ENZYME proteins:Hydrolases	Plasma membrane (Approved)				0	0	1	0	0	0	0	0	0	0	0	0	0	0	0	0	0	0	0	0
AQP1	358	symbol	H. sapiens	358	H. sapiens	AQP1	aquaporin 1 (Colton blood group)	GO:0085018 maintenance of symbiont-containing vacuole by host;GO:0035378 carbon dioxide transmembrane transport;GO:0046878 positive regulation of saliva secretion		Blood group antigen proteins; Transporters:Transporter channels and pores	Plasma membrane (Supported)	Acetazolamide; B-nonylglucoside; Mersalyl			0	0	1	1	1	1	0	0	0	1	0	1	0	0	0	0	1	1	0	0
PPIA	5478	symbol	H. sapiens	5478	H. sapiens	PPIA	peptidylprolyl isomerase A	GO:0019061 uncoating of virus;GO:0061944 negative regulation of protein K48-linked ubiquitination;GO:0061945 regulation of protein K48-linked ubiquitination		ENZYME proteins:Isomerase; Enzymes; Predicted secreted proteins; Predicted intracellular proteins		Cyclosporine; Proline; (3r)-1-Acetyl-3-Methylpiperidine; Ethyl Oxo(Piperidin-1-Yl)Acetate; Sanglifehrin A; Copper; Artenimol		(M5924)HALLMARK MTORC1 SIGNALING; (M5926)HALLMARK MYC TARGETS V1; (M5937)HALLMARK GLYCOLYSIS	1	1	1	1	0	0	0	0	0	1	0	0	0	0	0	0	0	0	0	0
TNR	7143	symbol	H. sapiens	7143	H. sapiens	TNR	tenascin R	GO:0048688 negative regulation of sprouting of injured axon;GO:0048692 negative regulation of axon extension involved in regeneration;GO:0048686 regulation of sprouting of injured axon		Predicted secreted proteins; Predicted intracellular proteins			(M3008)NABA ECM GLYCOPROTEINS; (M5884)NABA CORE MATRISOME; (M5889)NABA MATRISOME		0	1	1	0	1	1	0	0	0	0	0	0	0	0	0	0	0	0	1	0
NUTF2	10204	symbol	H. sapiens	10204	H. sapiens	NUTF2	nuclear transport factor 2	GO:0090204 protein localization to nuclear pore;GO:0090435 protein localization to nuclear envelope;GO:1904046 negative regulation of vascular endothelial growth factor production		Predicted intracellular proteins					0	0	0	0	0	0	1	0	0	1	0	0	0	0	0	1	0	0	0	0
ENTPD2	954	symbol	H. sapiens	954	H. sapiens	ENTPD2	ectonucleoside triphosphate diphosphohydrolase 2	GO:0009137 purine nucleoside diphosphate catabolic process;GO:0009181 purine ribonucleoside diphosphate catabolic process;GO:0009191 ribonucleoside diphosphate catabolic process							0	0	0	0	0	0	0	1	0	0	0	0	1	0	0	0	0	0	0	0
PLXNA1	5361	symbol	H. sapiens	5361	H. sapiens	PLXNA1	plexin A1	GO:0060666 dichotomous subdivision of terminal units involved in salivary gland branching;GO:0060600 dichotomous subdivision of an epithelial terminal unit;GO:1902287 semaphorin-plexin signaling pathway involved in axon guidance			Nucleoplasm (Supported); Additional: Cytosol		(M5880)NABA ECM AFFILIATED; (M5885)NABA MATRISOME ASSOCIATED; (M5889)NABA MATRISOME		0	1	0	1	0	1	0	0	0	0	0	0	0	0	0	0	0	0	0	0
MAVS	57506	symbol	H. sapiens	57506	H. sapiens	MAVS	mitochondrial antiviral signaling protein	GO:0071660 positive regulation of IP-10 production;GO:0071612 IP-10 production;GO:0071658 regulation of IP-10 production			Mitochondria (Enhanced)				1	0	0	1	0	0	1	0	0	1	0	0	0	0	0	1	1	0	0	0
ATP5J2-PTCD1	100526740	gene_synonym	H. sapiens	100526740	H. sapiens	ATP5MF-PTCD1	ATP5MF-PTCD1 readthrough			Predicted intracellular proteins	Mitochondria (Approved)				0	0	0	0	0	0	0	0	0	0	0	0	0	0	0	0	0	0	0	0
ATP5J2	9551	gene_synonym	H. sapiens	9551	H. sapiens	ATP5MF	ATP synthase membrane subunit f	GO:0042776 mitochondrial ATP synthesis coupled proton transport;GO:0015985 energy coupled proton transport, down electrochemical gradient;GO:0015986 ATP synthesis coupled proton transport		Predicted intracellular proteins	Mitochondria (Supported); Additional: Nuclear membrane			(M5936)HALLMARK OXIDATIVE PHOSPHORYLATION	0	0	0	0	0	0	0	1	1	0	0	0	0	0	0	0	0	0	0	0
MAT2B	27430	symbol	H. sapiens	27430	H. sapiens	MAT2B	methionine adenosyltransferase 2B	GO:0006556 S-adenosylmethionine biosynthetic process;GO:0046500 S-adenosylmethionine metabolic process;GO:0006730 one-carbon metabolic process		Predicted intracellular proteins	Plasma membrane (Approved)				0	0	0	1	0	0	0	0	0	0	0	0	0	0	0	0	0	0	0	0
NT5C	30833	symbol	H. sapiens	30833	H. sapiens	NT5C	5', 3'-nucleotidase, cytosolic	GO:0006204 IMP catabolic process;GO:0046054 dGMP metabolic process;GO:0046055 dGMP catabolic process		Predicted intracellular proteins	Cytosol (Supported)			(M5898)HALLMARK DNA REPAIR	0	0	1	0	0	0	0	1	0	0	1	0	1	0	0	0	0	0	0	0
SLC25A6	293	symbol	H. sapiens	293	H. sapiens	SLC25A6	solute carrier family 25 member 6	GO:0140021 mitochondrial ADP transmembrane transport;GO:1990544 mitochondrial ATP transmembrane transport;GO:0015866 ADP transport		Transporters:Electrochemical Potential-driven transporters; FDA approved drug targets:Small molecule drugs	Mitochondria (Supported)	Clodronic acid; Etidronic acid		(M5936)HALLMARK OXIDATIVE PHOSPHORYLATION	0	0	1	1	1	0	1	1	1	1	0	0	0	0	0	0	0	1	0	0
MAP4	4134	symbol	H. sapiens	4134	H. sapiens	MAP4	microtubule associated protein 4	GO:0051012 microtubule sliding;GO:1902856 negative regulation of non-motile cilium assembly;GO:1902855 regulation of non-motile cilium assembly		FDA approved drug targets:Small molecule drugs; Predicted intracellular proteins	Cytosol;Microtubules;Plasma membrane (Enhanced)	Paclitaxel; Docetaxel; Artenimol			0	1	0	0	1	0	0	0	0	0	0	0	0	0	0	0	0	0	1	0
DDT	1652	symbol	H. sapiens	1652	H. sapiens	DDT	D-dopachrome tautomerase	GO:0010760 negative regulation of macrophage chemotaxis;GO:1905522 negative regulation of macrophage migration;GO:0002689 negative regulation of leukocyte chemotaxis		Enzymes; ENZYME proteins:Lyases; Predicted intracellular proteins	Mitochondria (Approved)			(M5905)HALLMARK ADIPOGENESIS; (M5934)HALLMARK XENOBIOTIC METABOLISM	0	1	0	1	0	0	0	0	0	0	0	0	0	0	0	0	0	0	0	0
DDTL	100037417	symbol	H. sapiens	100037417	H. sapiens	DDTL	D-dopachrome tautomerase like			Predicted intracellular proteins					0	0	0	0	0	0	0	0	0	0	0	0	0	0	0	0	0	0	0	0
PLEC	5339	symbol	H. sapiens	5339	H. sapiens	PLEC	plectin	GO:0031581 hemidesmosome assembly;GO:0045104 intermediate filament cytoskeleton organization;GO:0045103 intermediate filament-based process		Cancer-related genes:Mutational cancer driver genes; Disease related genes; Predicted intracellular proteins	Cytosol;Intermediate filaments (Supported); Additional: Focal adhesion sites			(M5947)HALLMARK IL2 STAT5 SIGNALING	0	0	0	1	0	1	0	0	0	0	0	0	0	1	0	0	0	0	0	0
CSRP1	1465	symbol	H. sapiens	1465	H. sapiens	CSRP1	cysteine and glycine rich protein 1	GO:0045214 sarcomere organization;GO:0030239 myofibril assembly;GO:0070527 platelet aggregation		Predicted intracellular proteins		Artenimol		(M5946)HALLMARK COAGULATION; (M5921)HALLMARK COMPLEMENT	0	0	0	1	0	1	0	0	0	0	0	0	0	0	1	0	0	0	0	0
PGAM2	5224	symbol	H. sapiens	5224	H. sapiens	PGAM2	phosphoglycerate mutase 2	GO:0046689 response to mercury ion;GO:0006735 NADH regeneration;GO:0061621 canonical glycolysis		Disease related genes; Enzymes; ENZYME proteins:Isomerase; Potential drug targets; Predicted intracellular proteins	Nucleoplasm (Approved); Additional: Cytosol;Nucleoli	Benzene Hexacarboxylic Acid; 3-phospho-D-glyceric acid		(M5891)HALLMARK HYPOXIA; (M5909)HALLMARK MYOGENESIS; (M5937)HALLMARK GLYCOLYSIS	0	0	1	0	0	0	0	1	0	0	1	1	1	0	0	0	0	0	0	0
BID	637	symbol	H. sapiens	637	H. sapiens	BID	BH3 interacting domain death agonist	GO:2000271 positive regulation of fibroblast apoptotic process;GO:0010918 positive regulation of mitochondrial membrane potential;GO:0097284 hepatocyte apoptotic process		Predicted intracellular proteins	Cytosol (Supported)		(M13096)SA PROGRAMMED CELL DEATH; (M84)PID ATM PATHWAY; (M197)PID HIV NEF PATHWAY	(M5941)HALLMARK UV RESPONSE UP; (M5902)HALLMARK APOPTOSIS	0	0	1	1	0	1	1	1	1	1	0	0	0	0	0	0	0	0	0	0
RBP1	5947	symbol	H. sapiens	5947	H. sapiens	RBP1	retinol binding protein 1	GO:0002138 retinoic acid biosynthetic process;GO:0006776 vitamin A metabolic process;GO:0016102 diterpenoid biosynthetic process		Predicted intracellular proteins	Cytosol (Approved); Additional: Nucleoplasm	Acitretin	(M207)PID RETINOIC ACID PATHWAY	(M5948)HALLMARK BILE ACID METABOLISM	0	0	0	0	0	0	0	0	0	1	0	0	0	0	0	0	0	0	0	0
MLC1	23209	symbol	H. sapiens	23209	H. sapiens	MLC1	modulator of VRAC current 1	GO:0047484 regulation of response to osmotic stress;GO:0072584 caveolin-mediated endocytosis;GO:0071397 cellular response to cholesterol		Disease related genes; Potential drug targets; Transporters	Cytosol (Supported)				0	0	0	0	0	0	0	0	0	0	0	1	0	0	0	1	1	0	0	0
PGPEP1	54858	symbol	H. sapiens	54858	H. sapiens	PGPEP1	pyroglutamyl-peptidase I	GO:0006508 proteolysis;GO:0019538 protein metabolic process;GO:1901564 organonitrogen compound metabolic process		Peptidases:Cysteine-type peptidases; Enzymes; Predicted intracellular proteins; ENZYME proteins:Hydrolases	Golgi apparatus (Approved)				0	0	0	0	0	0	0	0	0	0	0	0	0	0	0	0	0	0	0	0
PFN2	5217	symbol	H. sapiens	5217	H. sapiens	PFN2	profilin 2	GO:1900028 negative regulation of ruffle assembly;GO:1900027 regulation of ruffle assembly;GO:0120033 negative regulation of plasma membrane bounded cell projection assembly		Predicted intracellular proteins		Triglyme; Pentaglyme	(M16801)SIG REGULATION OF THE ACTIN CYTOSKELETON BY RHO GTPASES; (M8873)ST FAS SIGNALING PATHWAY	(M5930)HALLMARK EPITHELIAL MESENCHYMAL TRANSITION	0	1	1	1	0	1	0	0	0	0	0	0	0	0	0	0	0	0	1	1
RABGEF1	27342	symbol	H. sapiens	27342	H. sapiens	RABGEF1	RAB guanine nucleotide exchange factor 1	GO:0006612 protein targeting to membrane;GO:0090150 establishment of protein localization to membrane;GO:0006605 protein targeting		Transporters:Transporter channels and pores; Predicted intracellular proteins	Cytosol (Supported); Additional: Nucleoli		(M269)PID RAS PATHWAY		0	0	0	1	0	0	1	0	0	0	0	0	0	0	0	0	0	0	0	0
FABP7	2173	symbol	H. sapiens	2173	H. sapiens	FABP7	fatty acid binding protein 7	GO:0019433 triglyceride catabolic process;GO:0046461 neutral lipid catabolic process;GO:0046464 acylglycerol catabolic process		Predicted intracellular proteins	Nucleoplasm (Approved); Additional: Cytosol;Golgi apparatus				0	0	0	1	0	0	0	0	0	0	0	0	0	0	0	0	0	0	0	0
TUBB6	84617	symbol	H. sapiens	84617	H. sapiens	TUBB6	tubulin beta 6 class V	GO:0000226 microtubule cytoskeleton organization;GO:0007017 microtubule-based process;GO:0000278 mitotic cell cycle		Disease related genes; Predicted intracellular proteins	Microtubules (Supported); Additional: Cytokinetic bridge;Mitotic spindle	CYT997; Artenimol			0	0	1	1	0	0	0	1	0	0	0	0	0	0	0	0	0	0	0	1
HAAO	23498	symbol	H. sapiens	23498	H. sapiens	HAAO	3-hydroxyanthranilate 3,4-dioxygenase	GO:0043420 anthranilate metabolic process;GO:0019805 quinolinate biosynthetic process;GO:0046874 quinolinate metabolic process		ENZYME proteins:Oxidoreductases; Disease related genes; Enzymes; Potential drug targets; Predicted intracellular proteins					0	0	0	0	0	0	0	1	0	0	0	1	1	0	0	0	0	0	0	0
HIST1H4A	8359	gene_synonym	H. sapiens	8359	H. sapiens	H4C1	H4 clustered histone 1	GO:0045653 negative regulation of megakaryocyte differentiation;GO:0006335 DNA replication-dependent nucleosome assembly;GO:0034723 DNA replication-dependent nucleosome organization		Disease related genes; Predicted intracellular proteins					0	0	0	1	0	0	0	0	0	0	0	0	0	0	0	0	0	0	0	1
DENR	8562	symbol	H. sapiens	8562	H. sapiens	DENR	density regulated re-initiation and release factor	GO:0002188 translation reinitiation;GO:0032790 ribosome disassembly;GO:0001731 formation of translation preinitiation complex		Predicted intracellular proteins	Cytosol (Approved)				0	0	0	0	0	0	0	0	0	0	0	0	0	0	0	0	0	0	0	0
MGST3	4259	symbol	H. sapiens	4259	H. sapiens	MGST3	microsomal glutathione S-transferase 3	GO:0019370 leukotriene biosynthetic process;GO:1901685 glutathione derivative metabolic process;GO:1901687 glutathione derivative biosynthetic process		ENZYME proteins:Transferases; Enzymes	Nucleoplasm (Approved)	Glutathione		(M5905)HALLMARK ADIPOGENESIS; (M5936)HALLMARK OXIDATIVE PHOSPHORYLATION; (M5945)HALLMARK HEME METABOLISM	0	0	1	0	0	0	0	0	0	0	0	1	0	0	0	0	0	0	0	0
TUBA1C	84790	symbol	H. sapiens	84790	H. sapiens	TUBA1C	tubulin alpha 1c	GO:0030705 cytoskeleton-dependent intracellular transport;GO:0051301 cell division;GO:0000226 microtubule cytoskeleton organization		Predicted intracellular proteins	Microtubules (Supported)	Epothilone D; Patupilone; CYT997; 2-MERCAPTO-N-[1,2,3,10-TETRAMETHOXY-9-OXO-5,6,7,9-TETRAHYDRO-BENZO[A]HEPTALEN-7-YL]ACETAMIDE			0	0	1	1	0	0	0	1	0	0	0	0	0	0	1	0	0	0	0	1
AMER2	219287	symbol	H. sapiens	219287	H. sapiens	AMER2	APC membrane recruitment protein 2	GO:0007398 ectoderm development;GO:0090090 negative regulation of canonical Wnt signaling pathway;GO:0030178 negative regulation of Wnt signaling pathway		Predicted intracellular proteins	Plasma membrane (Supported)				0	0	0	1	0	0	0	0	0	0	0	0	0	0	0	0	0	0	0	0
DYNC1H1	1778	symbol	H. sapiens	1778	H. sapiens	DYNC1H1	dynein cytoplasmic 1 heavy chain 1	GO:0072382 minus-end-directed vesicle transport along microtubule;GO:0072385 minus-end-directed organelle transport along microtubule;GO:1905832 positive regulation of spindle assembly		Disease related genes; Predicted intracellular proteins	Centrosome;Cytosol (Supported)		(M163)PID LIS1 PATHWAY	(M5893)HALLMARK MITOTIC SPINDLE	1	0	0	1	1	1	0	1	0	0	0	0	0	0	0	1	0	0	0	1
ARL1	400	symbol	H. sapiens	400	H. sapiens	ARL1	ADP ribosylation factor like GTPase 1	GO:0031584 activation of phospholipase D activity;GO:0009404 toxin metabolic process;GO:0034067 protein localization to Golgi apparatus		Predicted intracellular proteins	Golgi apparatus (Supported)	Guanosine-5'-Diphosphate			0	0	0	1	0	0	0	0	0	0	0	0	0	0	0	0	0	0	0	1
ATP5L	10632	gene_synonym	H. sapiens	10632	H. sapiens	ATP5MG	ATP synthase membrane subunit g	GO:0042776 mitochondrial ATP synthesis coupled proton transport;GO:0015985 energy coupled proton transport, down electrochemical gradient;GO:0015986 ATP synthesis coupled proton transport		Predicted intracellular proteins	Mitochondria (Supported)	Artenimol; Phenethyl Isothiocyanate		(M5936)HALLMARK OXIDATIVE PHOSPHORYLATION	0	0	0	0	0	0	0	1	1	0	0	0	0	0	0	0	0	0	0	0
USMG5	84833	gene_synonym	H. sapiens	84833	H. sapiens	ATP5MK	ATP synthase membrane subunit k				Mitochondria (Supported)				0	0	0	0	0	0	0	0	0	0	0	0	0	0	0	0	0	0	0	0
ARL8B	55207	symbol	H. sapiens	55207	H. sapiens	ARL8B	ADP ribosylation factor like GTPase 8B	GO:0008089 anterograde axonal transport;GO:0098930 axonal transport;GO:0008088 axo-dendritic transport		Predicted intracellular proteins					0	0	0	0	1	0	0	0	0	0	0	0	0	0	0	0	0	0	0	0
AP3B1	8546	symbol	H. sapiens	8546	H. sapiens	AP3B1	adaptor related protein complex 3 subunit beta 1	GO:0090152 establishment of protein localization to mitochondrial membrane involved in mitochondrial fission;GO:0016182 synaptic vesicle budding from endosome;GO:0051138 positive regulation of NK T cell differentiation		Disease related genes; Predicted intracellular proteins	Nucleoplasm (Approved); Additional: Golgi apparatus			(M5910)HALLMARK PROTEIN SECRETION	0	0	1	1	1	0	1	1	1	0	0	0	0	0	0	0	0	0	0	0
SF3B1	23451	symbol	H. sapiens	23451	H. sapiens	SF3B1	splicing factor 3b subunit 1	GO:0045815 positive regulation of gene expression, epigenetic;GO:0000245 spliceosomal complex assembly;GO:0022618 ribonucleoprotein complex assembly		Cancer-related genes:Mutational cancer driver genes; Cancer-related genes:Mutated cancer genes; Predicted intracellular proteins	Nuclear speckles (Enhanced)	H3B-8800			0	0	0	1	1	0	0	0	0	0	0	0	0	0	0	0	0	0	0	0
S100A1	6271	symbol	H. sapiens	6271	H. sapiens	S100A1	S100 calcium binding protein A1	GO:0051000 positive regulation of nitric-oxide synthase activity;GO:0032770 positive regulation of monooxygenase activity;GO:0021762 substantia nigra development		Predicted intracellular proteins; Transporters:Accessory Factors Involved in Transport; Cancer-related genes:Candidate cancer biomarkers	Cytosol (Supported); Additional: Golgi apparatus;Nucleoplasm	Olopatadine	(M5883)NABA SECRETED FACTORS; (M5885)NABA MATRISOME ASSOCIATED; (M5889)NABA MATRISOME	(M5946)HALLMARK COAGULATION; (M5947)HALLMARK IL2 STAT5 SIGNALING	0	0	1	1	0	0	0	0	0	0	0	0	0	0	0	0	0	0	0	0
UQCR10	29796	symbol	H. sapiens	29796	H. sapiens	UQCR10	ubiquinol-cytochrome c reductase, complex III subunit X	GO:0006122 mitochondrial electron transport, ubiquinol to cytochrome c;GO:0009060 aerobic respiration;GO:0042775 mitochondrial ATP synthesis coupled electron transport				2-Hexyloxy-6-Hydroxymethyl-Tetrahydro-Pyran-3,4,5-Triol; 6-Hydroxy-5-undecyl-4,7-benzothiazoledione; Azoxystrobin; 5-Heptyl-6-hydroxy-1,3-benzothiazole-4,7-dione; (5S)-3-ANILINO-5-(2,4-DIFLUOROPHENYL)-5-METHYL-1,3-OXAZOLIDINE-2,4-DIONE; (S)-famoxadone; METHYL (2Z)-3-METHOXY-2-{2-[(E)-2-PHENYLVINYL]PHENYL}ACRYLATE; 2-Nonyl-4-quinolinol 1-oxide; Ubiquinone Q2		(M5905)HALLMARK ADIPOGENESIS; (M5936)HALLMARK OXIDATIVE PHOSPHORYLATION	0	0	0	0	0	0	0	1	1	0	0	0	0	0	0	0	0	0	0	0
FLNB	2317	symbol	H. sapiens	2317	H. sapiens	FLNB	filamin B	GO:0007517 muscle organ development;GO:0061061 muscle structure development;GO:0030036 actin cytoskeleton organization		Predicted intracellular proteins; Disease related genes; Transporters:Accessory Factors Involved in Transport; Potential drug targets	Plasma membrane (Supported); Additional: Actin filaments;Cytosol;Golgi apparatus			(M5893)HALLMARK MITOTIC SPINDLE; (M5906)HALLMARK ESTROGEN RESPONSE EARLY; (M5907)HALLMARK ESTROGEN RESPONSE LATE	0	0	0	1	0	1	0	0	0	0	0	0	0	0	1	0	0	0	0	0
SRP9	6726	symbol	H. sapiens	6726	H. sapiens	SRP9	signal recognition particle 9	GO:0045900 negative regulation of translational elongation;GO:0006448 regulation of translational elongation;GO:0006614 SRP-dependent cotranslational protein targeting to membrane		Transporters:Primary Active Transporters; Predicted intracellular proteins			(M182)PID IL3 PATHWAY	(M5957)HALLMARK PANCREAS BETA CELLS	0	0	0	1	0	0	1	0	0	0	0	0	0	0	0	0	0	0	0	0
PRKDC	5591	symbol	H. sapiens	5591	H. sapiens	PRKDC	protein kinase, DNA-activated, catalytic subunit	GO:2001229 negative regulation of response to gamma radiation;GO:2001228 regulation of response to gamma radiation;GO:1905219 regulation of platelet formation	Atypical: PI3/PI4-kinase family	Disease related genes; ENZYME proteins:Transferases; Enzymes; Kinases:Atypical kinases; Cancer-related genes:Candidate cancer biomarkers; Potential drug targets; Predicted intracellular proteins	Nucleoplasm (Enhanced)	Caffeine; SF1126	(M42)PID DNA PK PATHWAY; (M258)PID BARD1 PATHWAY; (M249)PID PI3KCI AKT PATHWAY	(M5925)HALLMARK E2F TARGETS	0	1	1	1	0	0	0	0	0	0	0	0	0	0	0	0	1	0	0	0
ATP5I	521	gene_synonym	H. sapiens	521	H. sapiens	ATP5ME	ATP synthase membrane subunit e	GO:0042776 mitochondrial ATP synthesis coupled proton transport;GO:0015985 energy coupled proton transport, down electrochemical gradient;GO:0015986 ATP synthesis coupled proton transport		Predicted intracellular proteins	Mitochondria (Supported)	Phenethyl Isothiocyanate		(M5936)HALLMARK OXIDATIVE PHOSPHORYLATION	0	0	0	0	0	0	0	1	1	0	0	0	0	0	0	0	0	0	0	0
TNC	3371	symbol	H. sapiens	3371	H. sapiens	TNC	tenascin C	GO:0060739 mesenchymal-epithelial cell signaling involved in prostate gland development;GO:0060447 bud outgrowth involved in lung branching;GO:0071798 response to prostaglandin D		Predicted intracellular proteins; Disease related genes; Predicted secreted proteins; Cancer-related genes:Candidate cancer biomarkers			(M118)PID INTEGRIN A9B1 PATHWAY; (M165)PID SYNDECAN 4 PATHWAY; (M53)PID INTEGRIN3 PATHWAY	(M5890)HALLMARK TNFA SIGNALING VIA NFKB; (M5930)HALLMARK EPITHELIAL MESENCHYMAL TRANSITION	0	1	0	1	0	1	0	0	0	0	0	1	0	0	0	0	1	0	1	0
LRP1	4035	symbol	H. sapiens	4035	H. sapiens	LRP1	LDL receptor related protein 1	GO:0048687 positive regulation of sprouting of injured axon;GO:0048691 positive regulation of axon extension involved in regeneration;GO:0048674 collateral sprouting of injured axon		Predicted intracellular proteins; CD markers; Disease related genes; Candidate cardiovascular disease genes	Vesicles (Approved); Additional: Nucleoplasm	Antihemophilic factor, human recombinant; Tenecteplase; Coagulation Factor IX (Recombinant); Lanoteplase; Coagulation Factor IX Human; Lonoctocog alfa; Moroctocog alfa	(M17761)ST WNT BETA CATENIN PATHWAY; (M159)PID AMB2 NEUTROPHILS PATHWAY; (M174)PID UPA UPAR PATHWAY	(M5946)HALLMARK COAGULATION; (M5921)HALLMARK COMPLEMENT; (M5930)HALLMARK EPITHELIAL MESENCHYMAL TRANSITION	1	1	1	1	0	1	1	0	1	1	0	0	0	1	0	0	1	0	1	0
HMGB1	3146	symbol	H. sapiens	3146	H. sapiens	HMGB1	high mobility group box 1	GO:0032072 regulation of restriction endodeoxyribonuclease activity;GO:0017055 negative regulation of RNA polymerase II transcriptional preinitiation complex assembly;GO:0045819 positive regulation of glycogen catabolic process		Predicted intracellular proteins	Nucleoplasm (Supported)	Chloroquine; Ethyl pyruvate	(M264)PID TOLL ENDOGENOUS PATHWAY; (M159)PID AMB2 NEUTROPHILS PATHWAY; (M53)PID INTEGRIN3 PATHWAY		1	1	1	1	0	1	0	1	0	0	0	1	1	1	1	0	0	0	1	0
S100B	6285	symbol	H. sapiens	6285	H. sapiens	S100B	S100 calcium binding protein B	GO:0043123 positive regulation of I-kappaB kinase/NF-kappaB signaling;GO:0007611 learning or memory;GO:0043122 regulation of I-kappaB kinase/NF-kappaB signaling		Predicted intracellular proteins; Transporters:Accessory Factors Involved in Transport; Candidate cardiovascular disease genes; Cancer-related genes:Candidate cancer biomarkers	Cytosol;Nucleoplasm (Supported); Additional: Vesicles	Olopatadine; Calcium; N-Formylmethionine; Arundic acid; (Z)-2-[2-(4-methylpiperazin-1-yl)benzyl]diazenecarbothioamide; 2-[(5-hex-1-yn-1-ylfuran-2-yl)carbonyl]-N-methylhydrazinecarbothioamide; Calcium citrate; Calcium Phosphate; Calcium phosphate dihydrate	(M5883)NABA SECRETED FACTORS; (M5885)NABA MATRISOME ASSOCIATED; (M5889)NABA MATRISOME		0	1	0	1	0	0	0	0	0	0	0	0	0	0	0	0	0	0	0	0
UTRN	7402	symbol	H. sapiens	7402	H. sapiens	UTRN	utrophin	GO:0014877 response to muscle inactivity involved in regulation of muscle adaptation;GO:0014894 response to denervation involved in regulation of muscle adaptation;GO:0014870 response to muscle inactivity		Predicted intracellular proteins	Nucleoplasm;Plasma membrane (Approved)	Zinc; Zinc acetate; Zinc chloride; Zinc sulfate, unspecified form			0	0	1	1	0	1	0	0	0	0	0	0	0	0	0	0	0	0	0	0
MACF1	23499	symbol	H. sapiens	23499	H. sapiens	MACF1	microtubule actin crosslinking factor 1	GO:0150011 regulation of neuron projection arborization;GO:0140058 neuron projection arborization;GO:0045773 positive regulation of axon extension		Predicted intracellular proteins	Actin filaments;Cell Junctions;Plasma membrane (Supported)				0	1	0	1	0	1	1	0	0	0	0	0	0	0	0	0	0	0	0	0

## Sheet: Enrichment
GroupID	Category	Term	Description	LogP	Log(q-value)	InTerm_InList	Genes	Symbols
1_Summary	GO Biological Processes	GO:0045055	regulated exocytosis	-14.2454	-9.8865	33/780	88,102,210,353,801,808,1778,2039,2950,3146,4860,5269,5478,5582,5879,6616,6647,6804,7450,8499,8541,8826,9588,9900,10326,11240,23071,23406,26059,57020,80331,112755,140885,3696,4137,4345,23729,57506,2185,4035	ACTN2,ADAM10,ALAD,APRT,CALM1,CALM3,DYNC1H1,DMTN,GSTP1,HMGB1,PNP,SERPINB6,PPIA,PRKCG,RAC1,SNAP25,SOD1,STX1A,VWF,PPFIA2,PPFIA3,IQGAP1,PRDX6,SV2A,SIRPB1,PADI2,ERP44,COTL1,ERC2,VPS35L,DNAJC5,STX1B,SIRPA,ITGB8,MAPT,CD200,SHPK,MAVS,PTK2B,LRP1
1_Member	GO Biological Processes	GO:0045055	regulated exocytosis	-14.2454	-9.8865	33/780	88,102,210,353,801,808,1778,2039,2950,3146,4860,5269,5478,5582,5879,6616,6647,6804,7450,8499,8541,8826,9588,9900,10326,11240,23071,23406,26059,57020,80331,112755,140885	ACTN2,ADAM10,ALAD,APRT,CALM1,CALM3,DYNC1H1,DMTN,GSTP1,HMGB1,PNP,SERPINB6,PPIA,PRKCG,RAC1,SNAP25,SOD1,STX1A,VWF,PPFIA2,PPFIA3,IQGAP1,PRDX6,SV2A,SIRPB1,PADI2,ERP44,COTL1,ERC2,VPS35L,DNAJC5,STX1B,SIRPA
1_Member	GO Biological Processes	GO:0002274	myeloid leukocyte activation	-9.10017	-6.25977	24/660	102,210,353,1778,2950,3146,3696,4137,4345,4860,5269,5478,5879,6616,8826,9588,10326,11240,23071,23406,23729,57020,80331,140885	ADAM10,ALAD,APRT,DYNC1H1,GSTP1,HMGB1,ITGB8,MAPT,CD200,PNP,SERPINB6,PPIA,RAC1,SNAP25,IQGAP1,PRDX6,SIRPB1,PADI2,ERP44,COTL1,SHPK,VPS35L,DNAJC5,SIRPA
1_Member	Reactome Gene Sets	R-HSA-6798695	Neutrophil degranulation	-8.6486	-5.92316	20/480	102,210,353,1778,2950,3146,4860,5269,5478,5879,6616,8826,9588,10326,11240,23071,23406,57020,80331,140885	ADAM10,ALAD,APRT,DYNC1H1,GSTP1,HMGB1,PNP,SERPINB6,PPIA,RAC1,SNAP25,IQGAP1,PRDX6,SIRPB1,PADI2,ERP44,COTL1,VPS35L,DNAJC5,SIRPA
1_Member	GO Biological Processes	GO:0043312	neutrophil degranulation	-8.55681	-5.86066	20/486	102,210,353,1778,2950,3146,4860,5269,5478,5879,6616,8826,9588,10326,11240,23071,23406,57020,80331,140885	ADAM10,ALAD,APRT,DYNC1H1,GSTP1,HMGB1,PNP,SERPINB6,PPIA,RAC1,SNAP25,IQGAP1,PRDX6,SIRPB1,PADI2,ERP44,COTL1,VPS35L,DNAJC5,SIRPA
1_Member	GO Biological Processes	GO:0002283	neutrophil activation involved in immune response	-8.51143	-5.82462	20/489	102,210,353,1778,2950,3146,4860,5269,5478,5879,6616,8826,9588,10326,11240,23071,23406,57020,80331,140885	ADAM10,ALAD,APRT,DYNC1H1,GSTP1,HMGB1,PNP,SERPINB6,PPIA,RAC1,SNAP25,IQGAP1,PRDX6,SIRPB1,PADI2,ERP44,COTL1,VPS35L,DNAJC5,SIRPA
1_Member	GO Biological Processes	GO:0002444	myeloid leukocyte mediated immunity	-8.35819	-5.75516	21/552	102,210,353,1778,2950,3146,4860,5269,5478,5879,6616,8826,9588,10326,11240,23071,23406,57020,57506,80331,140885	ADAM10,ALAD,APRT,DYNC1H1,GSTP1,HMGB1,PNP,SERPINB6,PPIA,RAC1,SNAP25,IQGAP1,PRDX6,SIRPB1,PADI2,ERP44,COTL1,VPS35L,MAVS,DNAJC5,SIRPA
1_Member	GO Biological Processes	GO:0002446	neutrophil mediated immunity	-8.34793	-5.75245	20/500	102,210,353,1778,2950,3146,4860,5269,5478,5879,6616,8826,9588,10326,11240,23071,23406,57020,80331,140885	ADAM10,ALAD,APRT,DYNC1H1,GSTP1,HMGB1,PNP,SERPINB6,PPIA,RAC1,SNAP25,IQGAP1,PRDX6,SIRPB1,PADI2,ERP44,COTL1,VPS35L,DNAJC5,SIRPA
1_Member	GO Biological Processes	GO:0042119	neutrophil activation	-8.33328	-5.74523	20/501	102,210,353,1778,2950,3146,4860,5269,5478,5879,6616,8826,9588,10326,11240,23071,23406,57020,80331,140885	ADAM10,ALAD,APRT,DYNC1H1,GSTP1,HMGB1,PNP,SERPINB6,PPIA,RAC1,SNAP25,IQGAP1,PRDX6,SIRPB1,PADI2,ERP44,COTL1,VPS35L,DNAJC5,SIRPA
1_Member	GO Biological Processes	GO:0036230	granulocyte activation	-8.2606	-5.71461	20/506	102,210,353,1778,2950,3146,4860,5269,5478,5879,6616,8826,9588,10326,11240,23071,23406,57020,80331,140885	ADAM10,ALAD,APRT,DYNC1H1,GSTP1,HMGB1,PNP,SERPINB6,PPIA,RAC1,SNAP25,IQGAP1,PRDX6,SIRPB1,PADI2,ERP44,COTL1,VPS35L,DNAJC5,SIRPA
1_Member	GO Biological Processes	GO:0043299	leukocyte degranulation	-7.829	-5.38918	20/537	102,210,353,1778,2950,3146,4860,5269,5478,5879,6616,8826,9588,10326,11240,23071,23406,57020,80331,140885	ADAM10,ALAD,APRT,DYNC1H1,GSTP1,HMGB1,PNP,SERPINB6,PPIA,RAC1,SNAP25,IQGAP1,PRDX6,SIRPB1,PADI2,ERP44,COTL1,VPS35L,DNAJC5,SIRPA
1_Member	GO Biological Processes	GO:0002275	myeloid cell activation involved in immune response	-7.65717	-5.2573	20/550	102,210,353,1778,2950,3146,4860,5269,5478,5879,6616,8826,9588,10326,11240,23071,23406,57020,80331,140885	ADAM10,ALAD,APRT,DYNC1H1,GSTP1,HMGB1,PNP,SERPINB6,PPIA,RAC1,SNAP25,IQGAP1,PRDX6,SIRPB1,PADI2,ERP44,COTL1,VPS35L,DNAJC5,SIRPA
1_Member	GO Biological Processes	GO:0002263	cell activation involved in immune response	-6.99564	-4.72252	22/724	102,210,353,1778,2185,2950,3146,4035,4860,5269,5478,5879,6616,8826,9588,10326,11240,23071,23406,57020,80331,140885	ADAM10,ALAD,APRT,DYNC1H1,PTK2B,GSTP1,HMGB1,LRP1,PNP,SERPINB6,PPIA,RAC1,SNAP25,IQGAP1,PRDX6,SIRPB1,PADI2,ERP44,COTL1,VPS35L,DNAJC5,SIRPA
1_Member	GO Biological Processes	GO:0002366	leukocyte activation involved in immune response	-6.40774	-4.26632	21/720	102,210,353,1778,2185,2950,3146,4860,5269,5478,5879,6616,8826,9588,10326,11240,23071,23406,57020,80331,140885	ADAM10,ALAD,APRT,DYNC1H1,PTK2B,GSTP1,HMGB1,PNP,SERPINB6,PPIA,RAC1,SNAP25,IQGAP1,PRDX6,SIRPB1,PADI2,ERP44,COTL1,VPS35L,DNAJC5,SIRPA
2_Summary	GO Biological Processes	GO:0048858	cell projection morphogenesis	-11.307	-7.41003	27/663	102,214,2596,2817,4035,4137,4884,4974,5361,5879,6285,6714,7070,7143,7155,7314,7430,8239,8499,8826,9369,9693,10752,10763,23499,26047,55740,6647,3371,4685,2039,5591,2185,4134,5217,6616,9456,112755,257194,375790,1012,1652,2950,3146,5478,7857,9647,11240,5716,10409,10591,2023,220296	ADAM10,ALCAM,GAP43,GPC1,LRP1,MAPT,NPTX1,OMG,PLXNA1,RAC1,S100B,SRC,THY1,TNR,TOP2B,UBB,EZR,USP9X,PPFIA2,IQGAP1,NRXN3,RAPGEF2,CHL1,NES,MACF1,CNTNAP2,ENAH,SOD1,TNC,NCAM2,DMTN,PRKDC,PTK2B,MAP4,PFN2,SNAP25,HOMER1,STX1B,NEGR1,AGRN,CDH13,DDT,GSTP1,HMGB1,PPIA,SCG2,PPM1F,PADI2,PSMD10,BASP1,DNPH1,ENO1,HEPACAM
2_Member	GO Biological Processes	GO:0048858	cell projection morphogenesis	-11.307	-7.41003	27/663	102,214,2596,2817,4035,4137,4884,4974,5361,5879,6285,6714,7070,7143,7155,7314,7430,8239,8499,8826,9369,9693,10752,10763,23499,26047,55740	ADAM10,ALCAM,GAP43,GPC1,LRP1,MAPT,NPTX1,OMG,PLXNA1,RAC1,S100B,SRC,THY1,TNR,TOP2B,UBB,EZR,USP9X,PPFIA2,IQGAP1,NRXN3,RAPGEF2,CHL1,NES,MACF1,CNTNAP2,ENAH
2_Member	GO Biological Processes	GO:0032990	cell part morphogenesis	-11.07	-7.41003	27/679	102,214,2596,2817,4035,4137,4884,4974,5361,5879,6285,6714,7070,7143,7155,7314,7430,8239,8499,8826,9369,9693,10752,10763,23499,26047,55740	ADAM10,ALCAM,GAP43,GPC1,LRP1,MAPT,NPTX1,OMG,PLXNA1,RAC1,S100B,SRC,THY1,TNR,TOP2B,UBB,EZR,USP9X,PPFIA2,IQGAP1,NRXN3,RAPGEF2,CHL1,NES,MACF1,CNTNAP2,ENAH
2_Member	GO Biological Processes	GO:0048812	neuron projection morphogenesis	-10.8019	-7.32946	26/645	102,214,2596,2817,4035,4137,4884,4974,5361,5879,6285,6714,7070,7143,7155,7314,7430,8239,8499,8826,9369,9693,10752,23499,26047,55740	ADAM10,ALCAM,GAP43,GPC1,LRP1,MAPT,NPTX1,OMG,PLXNA1,RAC1,S100B,SRC,THY1,TNR,TOP2B,UBB,EZR,USP9X,PPFIA2,IQGAP1,NRXN3,RAPGEF2,CHL1,MACF1,CNTNAP2,ENAH
2_Member	GO Biological Processes	GO:0120039	plasma membrane bounded cell projection morphogenesis	-10.5969	-7.31714	26/659	102,214,2596,2817,4035,4137,4884,4974,5361,5879,6285,6714,7070,7143,7155,7314,7430,8239,8499,8826,9369,9693,10752,23499,26047,55740	ADAM10,ALCAM,GAP43,GPC1,LRP1,MAPT,NPTX1,OMG,PLXNA1,RAC1,S100B,SRC,THY1,TNR,TOP2B,UBB,EZR,USP9X,PPFIA2,IQGAP1,NRXN3,RAPGEF2,CHL1,MACF1,CNTNAP2,ENAH
2_Member	GO Biological Processes	GO:0048667	cell morphogenesis involved in neuron differentiation	-10.2456	-7.06282	24/579	102,214,2596,2817,4035,4137,4884,4974,5361,5879,6285,6647,6714,7070,7143,7155,7430,8239,8499,9369,9693,10752,23499,55740	ADAM10,ALCAM,GAP43,GPC1,LRP1,MAPT,NPTX1,OMG,PLXNA1,RAC1,S100B,SOD1,SRC,THY1,TNR,TOP2B,EZR,USP9X,PPFIA2,NRXN3,RAPGEF2,CHL1,MACF1,ENAH
2_Member	GO Biological Processes	GO:0061564	axon development	-9.8002	-6.74233	22/507	214,2596,2817,3371,4035,4137,4685,4884,4974,5361,5879,6285,6714,7070,7143,7155,7430,8239,9369,10752,23499,55740	ALCAM,GAP43,GPC1,TNC,LRP1,MAPT,NCAM2,NPTX1,OMG,PLXNA1,RAC1,S100B,SRC,THY1,TNR,TOP2B,EZR,USP9X,NRXN3,CHL1,MACF1,ENAH
2_Member	GO Biological Processes	GO:0000904	cell morphogenesis involved in differentiation	-9.72394	-6.69947	26/723	102,214,2039,2596,2817,4035,4137,4884,4974,5361,5591,5879,6285,6647,6714,7070,7143,7155,7430,8239,8499,9369,9693,10752,23499,55740	ADAM10,ALCAM,DMTN,GAP43,GPC1,LRP1,MAPT,NPTX1,OMG,PLXNA1,PRKDC,RAC1,S100B,SOD1,SRC,THY1,TNR,TOP2B,EZR,USP9X,PPFIA2,NRXN3,RAPGEF2,CHL1,MACF1,ENAH
2_Member	GO Biological Processes	GO:0007409	axonogenesis	-8.965	-6.15017	20/460	214,2596,2817,4035,4137,4884,4974,5361,5879,6285,6714,7070,7143,7155,7430,8239,9369,10752,23499,55740	ALCAM,GAP43,GPC1,LRP1,MAPT,NPTX1,OMG,PLXNA1,RAC1,S100B,SRC,THY1,TNR,TOP2B,EZR,USP9X,NRXN3,CHL1,MACF1,ENAH
2_Member	GO Biological Processes	GO:0120035	regulation of plasma membrane bounded cell projection organization	-8.56133	-5.86066	24/703	102,2039,2185,2596,4035,4134,4137,4974,5217,5361,5879,6616,6714,7070,7143,7430,8499,8826,9456,9693,23499,112755,257194,375790	ADAM10,DMTN,PTK2B,GAP43,LRP1,MAP4,MAPT,OMG,PFN2,PLXNA1,RAC1,SNAP25,SRC,THY1,TNR,EZR,PPFIA2,IQGAP1,HOMER1,RAPGEF2,MACF1,STX1B,NEGR1,AGRN
2_Member	GO Biological Processes	GO:0031344	regulation of cell projection organization	-8.45384	-5.78793	24/712	102,2039,2185,2596,4035,4134,4137,4974,5217,5361,5879,6616,6714,7070,7143,7430,8499,8826,9456,9693,23499,112755,257194,375790	ADAM10,DMTN,PTK2B,GAP43,LRP1,MAP4,MAPT,OMG,PFN2,PLXNA1,RAC1,SNAP25,SRC,THY1,TNR,EZR,PPFIA2,IQGAP1,HOMER1,RAPGEF2,MACF1,STX1B,NEGR1,AGRN
2_Member	GO Biological Processes	GO:0006935	chemotaxis	-7.88832	-5.4325	22/644	102,214,1012,1652,2185,2596,2817,2950,3146,4035,5361,5478,5879,6714,7143,7430,7857,9369,9647,10752,11240,55740	ADAM10,ALCAM,CDH13,DDT,PTK2B,GAP43,GPC1,GSTP1,HMGB1,LRP1,PLXNA1,PPIA,RAC1,SRC,TNR,EZR,SCG2,NRXN3,PPM1F,CHL1,PADI2,ENAH
2_Member	GO Biological Processes	GO:0042330	taxis	-7.86429	-5.41919	22/646	102,214,1012,1652,2185,2596,2817,2950,3146,4035,5361,5478,5879,6714,7143,7430,7857,9369,9647,10752,11240,55740	ADAM10,ALCAM,CDH13,DDT,PTK2B,GAP43,GPC1,GSTP1,HMGB1,LRP1,PLXNA1,PPIA,RAC1,SRC,TNR,EZR,SCG2,NRXN3,PPM1F,CHL1,PADI2,ENAH
2_Member	GO Biological Processes	GO:0010769	regulation of cell morphogenesis involved in differentiation	-5.9947	-3.93683	13/300	102,2039,4035,4137,4974,5361,5591,5879,7070,7143,8499,9693,23499	ADAM10,DMTN,LRP1,MAPT,OMG,PLXNA1,PRKDC,RAC1,THY1,TNR,PPFIA2,RAPGEF2,MACF1
2_Member	GO Biological Processes	GO:0045927	positive regulation of growth	-5.9842	-3.93269	12/253	102,2185,4035,4137,5591,5716,7430,9647,10409,10591,23499,375790	ADAM10,PTK2B,LRP1,MAPT,PRKDC,PSMD10,EZR,PPM1F,BASP1,DNPH1,MACF1,AGRN
2_Member	GO Biological Processes	GO:0022604	regulation of cell morphogenesis	-5.66557	-3.68141	16/486	102,2039,2185,4035,4137,4974,5361,5591,5879,6714,7070,7143,7430,8499,9693,23499	ADAM10,DMTN,PTK2B,LRP1,MAPT,OMG,PLXNA1,PRKDC,RAC1,SRC,THY1,TNR,EZR,PPFIA2,RAPGEF2,MACF1
2_Member	GO Biological Processes	GO:0007411	axon guidance	-5.57464	-3.60813	12/277	214,2596,2817,4035,5361,5879,6714,7143,7430,9369,10752,55740	ALCAM,GAP43,GPC1,LRP1,PLXNA1,RAC1,SRC,TNR,EZR,NRXN3,CHL1,ENAH
2_Member	GO Biological Processes	GO:0097485	neuron projection guidance	-5.55851	-3.59928	12/278	214,2596,2817,4035,5361,5879,6714,7143,7430,9369,10752,55740	ALCAM,GAP43,GPC1,LRP1,PLXNA1,RAC1,SRC,TNR,EZR,NRXN3,CHL1,ENAH
2_Member	GO Biological Processes	GO:0010975	regulation of neuron projection development	-4.89622	-3.12052	15/497	102,2185,4035,4137,4974,5361,6616,7070,7143,8499,8826,9693,23499,112755,257194	ADAM10,PTK2B,LRP1,MAPT,OMG,PLXNA1,SNAP25,THY1,TNR,PPFIA2,IQGAP1,RAPGEF2,MACF1,STX1B,NEGR1
2_Member	GO Biological Processes	GO:0040008	regulation of growth	-4.68899	-2.95745	17/648	102,2023,2185,2596,4035,4137,5591,5716,6647,7143,7430,9647,10409,10591,23499,220296,375790	ADAM10,ENO1,PTK2B,GAP43,LRP1,MAPT,PRKDC,PSMD10,SOD1,TNR,EZR,PPM1F,BASP1,DNPH1,MACF1,HEPACAM,AGRN
2_Member	GO Biological Processes	GO:1990138	neuron projection extension	-4.25663	-2.64802	8/164	214,4035,4137,5361,7143,8239,8826,23499	ALCAM,LRP1,MAPT,PLXNA1,TNR,USP9X,IQGAP1,MACF1
2_Member	GO Biological Processes	GO:0060560	developmental growth involved in morphogenesis	-4.05118	-2.48115	9/225	214,3371,4035,4137,5361,7143,8239,8826,23499	ALCAM,TNC,LRP1,MAPT,PLXNA1,TNR,USP9X,IQGAP1,MACF1
2_Member	GO Biological Processes	GO:0048589	developmental growth	-3.92778	-2.38907	15/605	214,2596,3371,4035,4137,5361,5591,6647,7143,7430,8239,8826,10409,23499,375790	ALCAM,GAP43,TNC,LRP1,MAPT,PLXNA1,PRKDC,SOD1,TNR,EZR,USP9X,IQGAP1,BASP1,MACF1,AGRN
2_Member	GO Biological Processes	GO:0016049	cell growth	-3.90756	-2.37732	13/473	102,214,2023,2185,4035,4137,5361,5716,7143,8239,8826,10591,23499	ADAM10,ALCAM,ENO1,PTK2B,LRP1,MAPT,PLXNA1,PSMD10,TNR,USP9X,IQGAP1,DNPH1,MACF1
2_Member	GO Biological Processes	GO:0010770	positive regulation of cell morphogenesis involved in differentiation	-3.65373	-2.17487	7/151	2039,4035,4137,5361,5591,5879,23499	DMTN,LRP1,MAPT,PLXNA1,PRKDC,RAC1,MACF1
2_Member	GO Biological Processes	GO:0045664	regulation of neuron differentiation	-3.62778	-2.15405	15/645	102,2185,4035,4137,4974,5361,6616,7070,7143,8499,8826,9693,23499,112755,257194	ADAM10,PTK2B,LRP1,MAPT,OMG,PLXNA1,SNAP25,THY1,TNR,PPFIA2,IQGAP1,RAPGEF2,MACF1,STX1B,NEGR1
2_Member	GO Biological Processes	GO:0031346	positive regulation of cell projection organization	-3.55888	-2.10631	11/382	2185,4035,4137,5361,5879,6714,8826,9693,23499,257194,375790	PTK2B,LRP1,MAPT,PLXNA1,RAC1,SRC,IQGAP1,RAPGEF2,MACF1,NEGR1,AGRN
2_Member	GO Biological Processes	GO:0048675	axon extension	-3.49727	-2.06149	6/114	214,4035,4137,7143,8239,23499	ALCAM,LRP1,MAPT,TNR,USP9X,MACF1
2_Member	GO Biological Processes	GO:0030307	positive regulation of cell growth	-3.4841	-2.05308	7/161	102,2185,4035,4137,5716,10591,23499	ADAM10,PTK2B,LRP1,MAPT,PSMD10,DNPH1,MACF1
2_Member	GO Biological Processes	GO:0048588	developmental cell growth	-3.35591	-1.94737	8/222	214,4035,4137,5361,7143,8239,8826,23499	ALCAM,LRP1,MAPT,PLXNA1,TNR,USP9X,IQGAP1,MACF1
2_Member	GO Biological Processes	GO:0048639	positive regulation of developmental growth	-3.34188	-1.93625	7/170	4035,4137,5591,7430,10409,23499,375790	LRP1,MAPT,PRKDC,EZR,BASP1,MACF1,AGRN
2_Member	GO Biological Processes	GO:0050770	regulation of axonogenesis	-3.29648	-1.899	7/173	4035,4137,4974,5361,7070,7143,23499	LRP1,MAPT,OMG,PLXNA1,THY1,TNR,MACF1
2_Member	GO Biological Processes	GO:0048638	regulation of developmental growth	-2.91702	-1.58424	9/322	4035,4137,5591,6647,7143,7430,10409,23499,375790	LRP1,MAPT,PRKDC,SOD1,TNR,EZR,BASP1,MACF1,AGRN
2_Member	GO Biological Processes	GO:0010976	positive regulation of neuron projection development	-2.72769	-1.43062	8/278	2185,4035,4137,5361,8826,9693,23499,257194	PTK2B,LRP1,MAPT,PLXNA1,IQGAP1,RAPGEF2,MACF1,NEGR1
2_Member	GO Biological Processes	GO:0045773	positive regulation of axon extension	-2.42817	-1.18366	3/39	4035,4137,23499	LRP1,MAPT,MACF1
2_Member	GO Biological Processes	GO:0050772	positive regulation of axonogenesis	-2.42638	-1.18342	4/79	4035,4137,5361,23499	LRP1,MAPT,PLXNA1,MACF1
2_Member	GO Biological Processes	GO:0010720	positive regulation of cell development	-2.31913	-1.09377	11/547	2039,2185,4035,4137,5361,5591,5879,8826,9693,23499,257194	DMTN,PTK2B,LRP1,MAPT,PLXNA1,PRKDC,RAC1,IQGAP1,RAPGEF2,MACF1,NEGR1
2_Member	GO Biological Processes	GO:0001558	regulation of cell growth	-2.22861	-1.01552	9/409	102,2023,2185,4035,4137,5716,7143,10591,23499	ADAM10,ENO1,PTK2B,LRP1,MAPT,PSMD10,TNR,DNPH1,MACF1
2_Member	GO Biological Processes	GO:0030516	regulation of axon extension	-2.19182	-0.985816	4/92	4035,4137,7143,23499	LRP1,MAPT,TNR,MACF1
2_Member	GO Biological Processes	GO:0045666	positive regulation of neuron differentiation	-2.0251	-0.848774	8/365	2185,4035,4137,5361,8826,9693,23499,257194	PTK2B,LRP1,MAPT,PLXNA1,IQGAP1,RAPGEF2,MACF1,NEGR1
2_Member	GO Biological Processes	GO:0061387	regulation of extent of cell growth	-2.00757	-0.83534	4/104	4035,4137,7143,23499	LRP1,MAPT,TNR,MACF1
3_Summary	Reactome Gene Sets	R-HSA-112315	Transmission across Chemical Synapses	-11.1082	-7.41003	18/270	88,781,801,805,808,4137,5582,5879,6616,6714,6804,8499,8541,9647,26960,80331,84617,84790,9369,9456,10313,8826,813,1278,2817,5138,5269,5478,6520,6647,7450,140885,291,293,2185,5333,5533,113026,114787,8546,6271,10409,11240,4637,2781,358,2023,4884,7143,7402,53826,112755,7171,2950,4259,2039,5224,5217,9693,1804,7070,7442,1012,637,7314,26047,4724,5716,8943,10226,54832,7430,3146,4035,9900,5208,29085,30833…	ACTN2,CACNA2D1,CALM1,CALM2,CALM3,MAPT,PRKCG,RAC1,SNAP25,SRC,STX1A,PPFIA2,PPFIA3,PPM1F,NBEA,DNAJC5,TUBB6,TUBA1C,NRXN3,HOMER1,RTN3,IQGAP1,CALU,COL1A2,GPC1,PDE2A,SERPINB6,PPIA,SLC3A2,SOD1,VWF,SIRPA,SLC25A4,SLC25A6,PTK2B,PLCD1,PPP3CC,PLCD3,GPRIN1,AP3B1,S100A1,BASP1,PADI2,MYL6,GNAZ,AQP1,ENO1,NPTX1,TNR,UTRN,FXYD6,STX1B,TPM4,GSTP1,MGST3,DMTN,PGAM2,PFN2,RAPGEF2,DPP6,THY1,TRPV1,CDH13,BID,UBB,CNTNAP2,NDUFS…
3_Member	Reactome Gene Sets	R-HSA-112315	Transmission across Chemical Synapses	-11.1082	-7.41003	18/270	88,781,801,805,808,4137,5582,5879,6616,6714,6804,8499,8541,9647,26960,80331,84617,84790	ACTN2,CACNA2D1,CALM1,CALM2,CALM3,MAPT,PRKCG,RAC1,SNAP25,SRC,STX1A,PPFIA2,PPFIA3,PPM1F,NBEA,DNAJC5,TUBB6,TUBA1C
3_Member	Reactome Gene Sets	R-HSA-112316	Neuronal System	-10.6973	-7.32946	21/410	88,781,801,805,808,4137,5582,5879,6616,6714,6804,8499,8541,9369,9456,9647,10313,26960,80331,84617,84790	ACTN2,CACNA2D1,CALM1,CALM2,CALM3,MAPT,PRKCG,RAC1,SNAP25,SRC,STX1A,PPFIA2,PPFIA3,NRXN3,HOMER1,PPM1F,RTN3,NBEA,DNAJC5,TUBB6,TUBA1C
3_Member	Reactome Gene Sets	R-HSA-442755	Activation of NMDA receptors and postsynaptic events	-9.63841	-6.65972	11/93	88,801,805,808,4137,5879,6714,9647,26960,84617,84790	ACTN2,CALM1,CALM2,CALM3,MAPT,RAC1,SRC,PPM1F,NBEA,TUBB6,TUBA1C
3_Member	Reactome Gene Sets	R-HSA-5626467	RHO GTPases activate IQGAPs	-8.26656	-5.71461	7/32	801,805,808,5879,8826,84617,84790	CALM1,CALM2,CALM3,RAC1,IQGAP1,TUBB6,TUBA1C
3_Member	Reactome Gene Sets	R-HSA-438064	Post NMDA receptor activation events	-7.7914	-5.37042	9/80	88,801,805,808,4137,5879,6714,84617,84790	ACTN2,CALM1,CALM2,CALM3,MAPT,RAC1,SRC,TUBB6,TUBA1C
3_Member	Reactome Gene Sets	R-HSA-9619483	Activation of AMPK downstream of NMDARs	-7.00125	-4.72252	6/29	801,805,808,4137,84617,84790	CALM1,CALM2,CALM3,MAPT,TUBB6,TUBA1C
3_Member	Reactome Gene Sets	R-HSA-112314	Neurotransmitter receptors and postsynaptic signal transmission	-6.96224	-4.70025	12/205	88,801,805,808,4137,5582,5879,6714,9647,26960,84617,84790	ACTN2,CALM1,CALM2,CALM3,MAPT,PRKCG,RAC1,SRC,PPM1F,NBEA,TUBB6,TUBA1C
3_Member	Reactome Gene Sets	R-HSA-9619229	Activation of RAC1 downstream of NMDARs	-6.313	-4.19961	4/9	801,805,808,5879	CALM1,CALM2,CALM3,RAC1
3_Member	Reactome Gene Sets	R-HSA-109582	Hemostasis	-6.16179	-4.06534	19/620	88,801,805,808,813,1278,2817,5138,5269,5478,5582,5879,6520,6647,6714,7450,84617,84790,140885	ACTN2,CALM1,CALM2,CALM3,CALU,COL1A2,GPC1,PDE2A,SERPINB6,PPIA,PRKCG,RAC1,SLC3A2,SOD1,SRC,VWF,TUBB6,TUBA1C,SIRPA
3_Member	Reactome Gene Sets	R-HSA-9617324	Negative regulation of NMDA receptor-mediated neuronal transmission	-6.13215	-4.0497	5/22	88,801,805,808,9647	ACTN2,CALM1,CALM2,CALM3,PPM1F
3_Member	KEGG Pathway	hsa04020	Calcium signaling pathway	-6.03263	-3.96408	11/206	291,293,801,805,808,2185,5333,5533,5582,113026,114787	SLC25A4,SLC25A6,CALM1,CALM2,CALM3,PTK2B,PLCD1,PPP3CC,PRKCG,PLCD3,GPRIN1
3_Member	Reactome Gene Sets	R-HSA-6802952	Signaling by BRAF and RAF fusions	-5.9574	-3.91025	7/67	801,805,808,6714,7450,8546,8826	CALM1,CALM2,CALM3,SRC,VWF,AP3B1,IQGAP1
3_Member	GO Biological Processes	GO:0021762	substantia nigra development	-5.93347	-3.89527	6/43	801,805,808,6271,10409,11240	CALM1,CALM2,CALM3,S100A1,BASP1,PADI2
3_Member	Reactome Gene Sets	R-HSA-9656223	Signaling by RAF1 mutants	-5.93347	-3.89527	6/43	801,805,808,6714,7450,8826	CALM1,CALM2,CALM3,SRC,VWF,IQGAP1
3_Member	Reactome Gene Sets	R-HSA-5627123	RHO GTPases activate PAKs	-5.9299	-3.89527	5/24	801,805,808,4637,5879	CALM1,CALM2,CALM3,MYL6,RAC1
3_Member	Reactome Gene Sets	R-HSA-9620244	Long-term potentiation	-5.9299	-3.89527	5/24	88,801,805,808,6714	ACTN2,CALM1,CALM2,CALM3,SRC
3_Member	Reactome Gene Sets	R-HSA-2025928	Calcineurin activates NFAT	-5.90032	-3.87587	4/11	801,805,808,5478	CALM1,CALM2,CALM3,PPIA
3_Member	Reactome Gene Sets	R-HSA-76005	Response to elevated platelet cytosolic Ca2+	-5.85374	-3.83337	9/134	88,801,805,808,813,5478,5582,6647,7450	ACTN2,CALM1,CALM2,CALM3,CALU,PPIA,PRKCG,SOD1,VWF
3_Member	Reactome Gene Sets	R-HSA-76002	Platelet activation, signaling and aggregation	-5.8081	-3.79162	12/263	88,801,805,808,813,1278,5478,5582,5879,6647,6714,7450	ACTN2,CALM1,CALM2,CALM3,CALU,COL1A2,PPIA,PRKCG,RAC1,SOD1,SRC,VWF
3_Member	KEGG Pathway	hsa05031	Amphetamine addiction	-5.78469	-3.77409	7/71	801,805,808,5533,5582,6804,114787	CALM1,CALM2,CALM3,PPP3CC,PRKCG,STX1A,GPRIN1
3_Member	Reactome Gene Sets	R-HSA-6802946	Signaling by moderate kinase activity BRAF mutants	-5.69922	-3.70953	6/47	801,805,808,6714,7450,8826	CALM1,CALM2,CALM3,SRC,VWF,IQGAP1
3_Member	Reactome Gene Sets	R-HSA-6802949	Signaling by RAS mutants	-5.69922	-3.70953	6/47	801,805,808,6714,7450,8826	CALM1,CALM2,CALM3,SRC,VWF,IQGAP1
3_Member	Reactome Gene Sets	R-HSA-6802955	Paradoxical activation of RAF signaling by kinase inactive BRAF	-5.69922	-3.70953	6/47	801,805,808,6714,7450,8826	CALM1,CALM2,CALM3,SRC,VWF,IQGAP1
3_Member	Reactome Gene Sets	R-HSA-9649948	Signaling downstream of RAS mutants	-5.69922	-3.70953	6/47	801,805,808,6714,7450,8826	CALM1,CALM2,CALM3,SRC,VWF,IQGAP1
3_Member	GO Biological Processes	GO:0031954	positive regulation of protein autophosphorylation	-5.65978	-3.67928	5/27	801,805,808,6714,8826	CALM1,CALM2,CALM3,SRC,IQGAP1
3_Member	KEGG Pathway	ko04020	Calcium signaling pathway	-5.64574	-3.66704	10/182	291,293,801,805,808,2185,5333,5533,5582,113026	SLC25A4,SLC25A6,CALM1,CALM2,CALM3,PTK2B,PLCD1,PPP3CC,PRKCG,PLCD3
3_Member	Reactome Gene Sets	R-HSA-1855204	Synthesis of IP3 and IP4 in the cytosol	-5.57718	-3.60813	5/28	801,805,808,5333,113026	CALM1,CALM2,CALM3,PLCD1,PLCD3
3_Member	GO Biological Processes	GO:0051343	positive regulation of cyclic-nucleotide phosphodiesterase activity	-5.30202	-3.41464	3/5	801,805,808	CALM1,CALM2,CALM3
3_Member	Reactome Gene Sets	R-HSA-112043	PLC beta mediated events	-5.29103	-3.41464	6/55	801,805,808,2781,5582,26960	CALM1,CALM2,CALM3,GNAZ,PRKCG,NBEA
3_Member	Reactome Gene Sets	R-HSA-6802957	Oncogenic MAPK signaling	-5.29067	-3.41464	7/84	801,805,808,6714,7450,8546,8826	CALM1,CALM2,CALM3,SRC,VWF,AP3B1,IQGAP1
3_Member	Reactome Gene Sets	R-HSA-112040	G-protein mediated events	-5.24471	-3.37856	6/56	801,805,808,2781,5582,26960	CALM1,CALM2,CALM3,GNAZ,PRKCG,NBEA
3_Member	GO Biological Processes	GO:0044057	regulation of system process	-5.14631	-3.30854	17/597	358,781,801,805,808,2023,2185,4884,6271,6647,6714,6804,7143,7402,9456,53826,112755	AQP1,CACNA2D1,CALM1,CALM2,CALM3,ENO1,PTK2B,NPTX1,S100A1,SOD1,SRC,STX1A,TNR,UTRN,HOMER1,FXYD6,STX1B
3_Member	GO Biological Processes	GO:0048857	neural nucleus development	-5.06821	-3.25708	6/60	801,805,808,6271,10409,11240	CALM1,CALM2,CALM3,S100A1,BASP1,PADI2
3_Member	Reactome Gene Sets	R-HSA-111885	Opioid Signalling	-5.02766	-3.22385	7/92	801,805,808,2781,5533,5582,26960	CALM1,CALM2,CALM3,GNAZ,PPP3CC,PRKCG,NBEA
3_Member	Reactome Gene Sets	R-HSA-114608	Platelet degranulation	-5.0078	-3.20694	8/129	88,801,805,808,813,5478,6647,7450	ACTN2,CALM1,CALM2,CALM3,CALU,PPIA,SOD1,VWF
3_Member	Reactome Gene Sets	R-HSA-111957	Cam-PDE 1 activation	-5.00357	-3.20576	3/6	801,805,808	CALM1,CALM2,CALM3
3_Member	Reactome Gene Sets	R-HSA-9022535	Loss of phosphorylation of MECP2 at T308	-5.00357	-3.20576	3/6	801,805,808	CALM1,CALM2,CALM3
3_Member	Reactome Gene Sets	R-HSA-111933	Calmodulin induced events	-4.95571	-3.16388	5/37	801,805,808,5582,26960	CALM1,CALM2,CALM3,PRKCG,NBEA
3_Member	Reactome Gene Sets	R-HSA-111997	CaM pathway	-4.95571	-3.16388	5/37	801,805,808,5582,26960	CALM1,CALM2,CALM3,PRKCG,NBEA
3_Member	Reactome Gene Sets	R-HSA-111996	Ca-dependent events	-4.84051	-3.07378	5/39	801,805,808,5582,26960	CALM1,CALM2,CALM3,PRKCG,NBEA
3_Member	Reactome Gene Sets	R-HSA-445355	Smooth Muscle Contraction	-4.78534	-3.02741	5/40	801,805,808,4637,7171	CALM1,CALM2,CALM3,MYL6,TPM4
3_Member	Reactome Gene Sets	R-HSA-163615	PKA activation	-4.75812	-3.00345	4/20	801,805,808,26960	CALM1,CALM2,CALM3,NBEA
3_Member	KEGG Pathway	ko05031	Amphetamine addiction	-4.75161	-3.00337	6/68	801,805,808,5533,5582,6804	CALM1,CALM2,CALM3,PPP3CC,PRKCG,STX1A
3_Member	KEGG Pathway	hsa04720	Long-term potentiation	-4.71499	-2.9783	6/69	801,805,808,5533,5582,114787	CALM1,CALM2,CALM3,PPP3CC,PRKCG,GPRIN1
3_Member	KEGG Pathway	ko05418	Fluid shear stress and atherosclerosis	-4.7038	-2.96918	8/142	801,805,808,2817,2950,4259,5879,6714	CALM1,CALM2,CALM3,GPC1,GSTP1,MGST3,RAC1,SRC
3_Member	GO Biological Processes	GO:0010801	negative regulation of peptidyl-threonine phosphorylation	-4.66908	-2.94966	4/21	801,805,808,2039	CALM1,CALM2,CALM3,DMTN
3_Member	Reactome Gene Sets	R-HSA-442982	Ras activation upon Ca2+ influx through NMDA receptor	-4.66908	-2.94966	4/21	88,801,805,808	ACTN2,CALM1,CALM2,CALM3
3_Member	Reactome Gene Sets	R-HSA-5218921	VEGFR2 mediated cell proliferation	-4.66908	-2.94966	4/21	801,805,808,6714	CALM1,CALM2,CALM3,SRC
3_Member	Reactome Gene Sets	R-HSA-1489509	DAG and IP3 signaling	-4.6286	-2.91864	5/43	801,805,808,5582,26960	CALM1,CALM2,CALM3,PRKCG,NBEA
3_Member	Reactome Gene Sets	R-HSA-1445148	Translocation of SLC2A4 (GLUT4) to the plasma membrane	-4.6086	-2.90291	6/72	801,805,808,5879,84617,84790	CALM1,CALM2,CALM3,RAC1,TUBB6,TUBA1C
3_Member	Reactome Gene Sets	R-HSA-111931	PKA-mediated phosphorylation of CREB	-4.58466	-2.88757	4/22	801,805,808,26960	CALM1,CALM2,CALM3,NBEA
3_Member	Reactome Gene Sets	R-HSA-438066	Unblocking of NMDA receptors, glutamate binding and activation	-4.58466	-2.88757	4/22	88,801,805,808	ACTN2,CALM1,CALM2,CALM3
3_Member	KEGG Pathway	hsa05418	Fluid shear stress and atherosclerosis	-4.5742	-2.88461	8/148	801,805,808,2817,2950,4259,5879,6714	CALM1,CALM2,CALM3,GPC1,GSTP1,MGST3,RAC1,SRC
3_Member	GO Biological Processes	GO:0006936	muscle contraction	-4.56693	-2.87827	12/349	88,781,801,805,808,2023,4637,5224,6647,7171,7402,9456	ACTN2,CACNA2D1,CALM1,CALM2,CALM3,ENO1,MYL6,PGAM2,SOD1,TPM4,UTRN,HOMER1
3_Member	GO Biological Processes	GO:0060316	positive regulation of ryanodine-sensitive calcium-release channel activity	-4.56156	-2.87383	3/8	801,805,808	CALM1,CALM2,CALM3
3_Member	KEGG Pathway	ko04921	Oxytocin signaling pathway	-4.49115	-2.82067	8/152	781,801,805,808,4637,5533,5582,6714	CACNA2D1,CALM1,CALM2,CALM3,MYL6,PPP3CC,PRKCG,SRC
3_Member	GO Biological Processes	GO:0031952	regulation of protein autophosphorylation	-4.43752	-2.78362	5/47	801,805,808,6714,8826	CALM1,CALM2,CALM3,SRC,IQGAP1
3_Member	GO Biological Processes	GO:0051000	positive regulation of nitric-oxide synthase activity	-4.42796	-2.78254	4/24	801,808,2185,6271	CALM1,CALM3,PTK2B,S100A1
3_Member	GO Biological Processes	GO:1903421	regulation of synaptic vesicle recycling	-4.42796	-2.78254	4/24	801,808,5533,112755	CALM1,CALM3,PPP3CC,STX1B
3_Member	GO Biological Processes	GO:1901844	regulation of cell communication by electrical coupling involved in cardiac conduction	-4.38804	-2.74764	3/9	801,805,808	CALM1,CALM2,CALM3
3_Member	KEGG Pathway	hsa04921	Oxytocin signaling pathway	-4.31332	-2.68439	8/161	781,801,805,808,4637,5533,5582,6714	CACNA2D1,CALM1,CALM2,CALM3,MYL6,PPP3CC,PRKCG,SRC
3_Member	Reactome Gene Sets	R-HSA-1483249	Inositol phosphate metabolism	-4.30571	-2.6808	5/50	801,805,808,5333,113026	CALM1,CALM2,CALM3,PLCD1,PLCD3
3_Member	Reactome Gene Sets	R-HSA-180024	DARPP-32 events	-4.28513	-2.66659	4/26	801,805,808,5533	CALM1,CALM2,CALM3,PPP3CC
3_Member	GO Biological Processes	GO:0051342	regulation of cyclic-nucleotide phosphodiesterase activity	-4.23571	-2.63039	3/10	801,805,808	CALM1,CALM2,CALM3
3_Member	Reactome Gene Sets	R-HSA-442729	CREB1 phosphorylation through the activation of CaMKII/CaMKK/CaMKIV cascasde	-4.23571	-2.63039	3/10	801,805,808	CALM1,CALM2,CALM3
3_Member	GO Biological Processes	GO:0030901	midbrain development	-4.17052	-2.58025	6/86	801,805,808,6271,10409,11240	CALM1,CALM2,CALM3,S100A1,BASP1,PADI2
3_Member	Reactome Gene Sets	R-HSA-442742	CREB1 phosphorylation through NMDA receptor-mediated activation of RAS signaling	-4.09226	-2.51511	4/29	88,801,805,808	ACTN2,CALM1,CALM2,CALM3
3_Member	Reactome Gene Sets	R-HSA-5218920	VEGFR2 mediated vascular permeability	-4.09226	-2.51511	4/29	801,805,808,5879	CALM1,CALM2,CALM3,RAC1
3_Member	GO Biological Processes	GO:0032770	positive regulation of monooxygenase activity	-4.03284	-2.46842	4/30	801,808,2185,6271	CALM1,CALM3,PTK2B,S100A1
3_Member	KEGG Pathway	hsa04015	Rap1 signaling pathway	-4.00742	-2.44665	9/228	801,805,808,5217,5582,5879,6714,9693,114787	CALM1,CALM2,CALM3,PFN2,PRKCG,RAC1,SRC,RAPGEF2,GPRIN1
3_Member	GO Biological Processes	GO:1904062	regulation of cation transmembrane transport	-3.99671	-2.43849	11/340	88,781,801,805,808,1804,2185,7070,7402,9456,53826	ACTN2,CACNA2D1,CALM1,CALM2,CALM3,DPP6,PTK2B,THY1,UTRN,HOMER1,FXYD6
3_Member	GO Biological Processes	GO:0035306	positive regulation of dephosphorylation	-3.99326	-2.43849	5/58	801,805,808,5478,6714	CALM1,CALM2,CALM3,PPIA,SRC
3_Member	GO Biological Processes	GO:0060315	negative regulation of ryanodine-sensitive calcium-release channel activity	-3.97761	-2.42894	3/12	801,805,808	CALM1,CALM2,CALM3
3_Member	Reactome Gene Sets	R-HSA-111932	CaMK IV-mediated phosphorylation of CREB	-3.97761	-2.42894	3/12	801,805,808	CALM1,CALM2,CALM3
3_Member	Reactome Gene Sets	R-HSA-1474151	Tetrahydrobiopterin (BH4) synthesis, recycling, salvage and regulation	-3.97761	-2.42894	3/12	801,805,808	CALM1,CALM2,CALM3
3_Member	Reactome Gene Sets	R-HSA-451306	Ionotropic activity of kainate receptors	-3.97761	-2.42894	3/12	801,805,808	CALM1,CALM2,CALM3
3_Member	Reactome Gene Sets	R-HSA-451308	Activation of Ca-permeable Kainate Receptor	-3.97761	-2.42894	3/12	801,805,808	CALM1,CALM2,CALM3
3_Member	GO Biological Processes	GO:0097553	calcium ion transmembrane import into cytosol	-3.97509	-2.42776	7/134	781,801,805,808,2185,7070,7442	CACNA2D1,CALM1,CALM2,CALM3,PTK2B,THY1,TRPV1
3_Member	GO Biological Processes	GO:0050848	regulation of calcium-mediated signaling	-3.95505	-2.41223	6/94	801,805,808,1012,2185,4137	CALM1,CALM2,CALM3,CDH13,PTK2B,MAPT
3_Member	KEGG Pathway	ko04070	Phosphatidylinositol signaling system	-3.87959	-2.35192	6/97	801,805,808,5333,5582,113026	CALM1,CALM2,CALM3,PLCD1,PRKCG,PLCD3
3_Member	GO Biological Processes	GO:0005513	detection of calcium ion	-3.86624	-2.34366	3/13	801,805,808	CALM1,CALM2,CALM3
3_Member	Reactome Gene Sets	R-HSA-203615	eNOS activation	-3.86624	-2.34366	3/13	801,805,808	CALM1,CALM2,CALM3
3_Member	Reactome Gene Sets	R-HSA-425561	Sodium/Calcium exchangers	-3.86624	-2.34366	3/13	801,805,808	CALM1,CALM2,CALM3
3_Member	Reactome Gene Sets	R-HSA-5210891	Uptake and function of anthrax toxins	-3.86624	-2.34366	3/13	801,805,808	CALM1,CALM2,CALM3
3_Member	Reactome Gene Sets	R-HSA-5607763	CLEC7A (Dectin-1) induces NFAT activation	-3.86624	-2.34366	3/13	801,805,808	CALM1,CALM2,CALM3
3_Member	Reactome Gene Sets	R-HSA-4420097	VEGFA-VEGFR2 Pathway	-3.85503	-2.33769	6/98	801,805,808,2185,5879,6714	CALM1,CALM2,CALM3,PTK2B,RAC1,SRC
3_Member	GO Biological Processes	GO:0010649	regulation of cell communication by electrical coupling	-3.76407	-2.26243	3/14	801,805,808	CALM1,CALM2,CALM3
3_Member	GO Biological Processes	GO:0051280	negative regulation of release of sequestered calcium ion into cytosol	-3.76407	-2.26243	3/14	801,805,808	CALM1,CALM2,CALM3
3_Member	GO Biological Processes	GO:1901841	regulation of high voltage-gated calcium channel activity	-3.76407	-2.26243	3/14	781,801,808	CACNA2D1,CALM1,CALM3
3_Member	Reactome Gene Sets	R-HSA-418359	Reduction of cytosolic Ca++ levels	-3.76407	-2.26243	3/14	801,805,808	CALM1,CALM2,CALM3
3_Member	Reactome Gene Sets	R-HSA-442720	CREB1 phosphorylation through the activation of Adenylate Cyclase	-3.76407	-2.26243	3/14	801,805,808	CALM1,CALM2,CALM3
3_Member	Reactome Gene Sets	R-HSA-9005891	Loss of function of MECP2 in Rett syndrome	-3.76407	-2.26243	3/14	801,805,808	CALM1,CALM2,CALM3
3_Member	Reactome Gene Sets	R-HSA-9005895	Pervasive developmental disorders	-3.76407	-2.26243	3/14	801,805,808	CALM1,CALM2,CALM3
3_Member	Reactome Gene Sets	R-HSA-9675151	Disorders of Developmental Biology	-3.76407	-2.26243	3/14	801,805,808	CALM1,CALM2,CALM3
3_Member	Reactome Gene Sets	R-HSA-9697154	Disorders of Nervous System Development	-3.76407	-2.26243	3/14	801,805,808	CALM1,CALM2,CALM3
3_Member	KEGG Pathway	ko04924	Renin secretion	-3.75705	-2.25788	5/65	358,801,805,808,5533	AQP1,CALM1,CALM2,CALM3,PPP3CC
3_Member	KEGG Pathway	hsa05167	kaposi sarcoma-associated herpesvirus infection	-3.74985	-2.25128	8/194	637,801,805,808,5533,5879,6714,7314	BID,CALM1,CALM2,CALM3,PPP3CC,RAC1,SRC,UBB
3_Member	GO Biological Processes	GO:0051592	response to calcium ion	-3.74364	-2.24567	7/146	801,805,808,2039,2185,8826,9456	CALM1,CALM2,CALM3,DMTN,PTK2B,IQGAP1,HOMER1
3_Member	KEGG Pathway	hsa04070	Phosphatidylinositol signaling system	-3.73639	-2.24141	6/103	801,805,808,5333,5582,113026	CALM1,CALM2,CALM3,PLCD1,PRKCG,PLCD3
3_Member	Reactome Gene Sets	R-HSA-5673000	RAF activation	-3.71683	-2.22362	4/36	801,805,808,6714	CALM1,CALM2,CALM3,SRC
3_Member	KEGG Pathway	hsa04750	inflammatory mediator regulation of trp channels	-3.71346	-2.22084	6/104	801,805,808,5582,6714,7442	CALM1,CALM2,CALM3,PRKCG,SRC,TRPV1
3_Member	KEGG Pathway	ko04720	Long-term potentiation	-3.69477	-2.20451	5/67	801,805,808,5533,5582	CALM1,CALM2,CALM3,PPP3CC,PRKCG
3_Member	GO Biological Processes	GO:1901021	positive regulation of calcium ion transmembrane transporter activity	-3.66986	-2.18646	4/37	781,801,805,808	CACNA2D1,CALM1,CALM2,CALM3
3_Member	Reactome Gene Sets	R-HSA-194138	Signaling by VEGF	-3.64616	-2.16807	6/107	801,805,808,2185,5879,6714	CALM1,CALM2,CALM3,PTK2B,RAC1,SRC
3_Member	GO Biological Processes	GO:0060402	calcium ion transport into cytosol	-3.63618	-2.15979	7/152	781,801,805,808,2185,7070,7442	CACNA2D1,CALM1,CALM2,CALM3,PTK2B,THY1,TRPV1
3_Member	GO Biological Processes	GO:2001259	positive regulation of cation channel activity	-3.63456	-2.15931	5/69	88,781,801,805,808	ACTN2,CACNA2D1,CALM1,CALM2,CALM3
3_Member	GO Biological Processes	GO:0032412	regulation of ion transmembrane transporter activity	-3.61787	-2.14949	9/257	88,781,801,805,808,2185,7402,9456,53826	ACTN2,CACNA2D1,CALM1,CALM2,CALM3,PTK2B,UTRN,HOMER1,FXYD6
3_Member	GO Biological Processes	GO:1904427	positive regulation of calcium ion transmembrane transport	-3.60518	-2.13837	5/70	781,801,805,808,7070	CACNA2D1,CALM1,CALM2,CALM3,THY1
3_Member	GO Biological Processes	GO:0035637	multicellular organismal signaling	-3.60158	-2.13633	8/204	781,801,805,808,6647,7143,26047,53826	CACNA2D1,CALM1,CALM2,CALM3,SOD1,TNR,CNTNAP2,FXYD6
3_Member	GO Biological Processes	GO:0010959	regulation of metal ion transport	-3.58802	-2.12454	11/379	88,781,801,805,808,1804,2185,7070,7402,9456,53826	ACTN2,CACNA2D1,CALM1,CALM2,CALM3,DPP6,PTK2B,THY1,UTRN,HOMER1,FXYD6
3_Member	GO Biological Processes	GO:0051284	positive regulation of sequestering of calcium ion	-3.58212	-2.12255	3/16	801,805,808	CALM1,CALM2,CALM3
3_Member	GO Biological Processes	GO:1900242	regulation of synaptic vesicle endocytosis	-3.58212	-2.12255	3/16	801,808,5533	CALM1,CALM3,PPP3CC
3_Member	GO Biological Processes	GO:0019932	second-messenger-mediated signaling	-3.58174	-2.12255	12/444	358,801,805,808,1012,2039,2185,4137,4724,5138,5533,9693	AQP1,CALM1,CALM2,CALM3,CDH13,DMTN,PTK2B,MAPT,NDUFS4,PDE2A,PPP3CC,RAPGEF2
3_Member	GO Biological Processes	GO:0051235	maintenance of location	-3.57262	-2.11789	10/319	801,805,808,2185,5716,7070,7442,8943,10226,54832	CALM1,CALM2,CALM3,PTK2B,PSMD10,THY1,TRPV1,AP3D1,PLIN3,VPS13C
3_Member	GO Biological Processes	GO:0003012	muscle system process	-3.56407	-2.11096	12/446	88,781,801,805,808,2023,4637,5224,6647,7171,7402,9456	ACTN2,CACNA2D1,CALM1,CALM2,CALM3,ENO1,MYL6,PGAM2,SOD1,TPM4,UTRN,HOMER1
3_Member	GO Biological Processes	GO:0051209	release of sequestered calcium ion into cytosol	-3.5387	-2.09027	6/112	801,805,808,2185,7070,7442	CALM1,CALM2,CALM3,PTK2B,THY1,TRPV1
3_Member	GO Biological Processes	GO:0051281	positive regulation of release of sequestered calcium ion into cytosol	-3.53695	-2.09027	4/40	801,805,808,7070	CALM1,CALM2,CALM3,THY1
3_Member	Reactome Gene Sets	R-HSA-9664323	FCGR3A-mediated IL10 synthesis	-3.53695	-2.09027	4/40	801,805,808,6714	CALM1,CALM2,CALM3,SRC
3_Member	KEGG Pathway	hsa04924	Renin secretion	-3.51982	-2.07632	5/73	358,801,805,808,5533	AQP1,CALM1,CALM2,CALM3,PPP3CC
3_Member	GO Biological Processes	GO:0051283	negative regulation of sequestering of calcium ion	-3.51788	-2.0749	6/113	801,805,808,2185,7070,7442	CALM1,CALM2,CALM3,PTK2B,THY1,TRPV1
3_Member	KEGG Pathway	ko04015	Rap1 signaling pathway	-3.51682	-2.07437	8/210	801,805,808,5217,5582,5879,6714,9693	CALM1,CALM2,CALM3,PFN2,PRKCG,RAC1,SRC,RAPGEF2
3_Member	Reactome Gene Sets	R-HSA-202131	Metabolism of nitric oxide: NOS3 activation and regulation	-3.50037	-2.0621	3/17	801,805,808	CALM1,CALM2,CALM3
3_Member	Reactome Gene Sets	R-HSA-70221	Glycogen breakdown (glycogenolysis)	-3.50037	-2.0621	3/17	801,805,808	CALM1,CALM2,CALM3
3_Member	GO Biological Processes	GO:0050850	positive regulation of calcium-mediated signaling	-3.49508	-2.06149	4/41	801,805,808,1012	CALM1,CALM2,CALM3,CDH13
3_Member	GO Biological Processes	GO:0019722	calcium-mediated signaling	-3.48922	-2.05718	8/212	801,805,808,1012,2039,2185,4137,5533	CALM1,CALM2,CALM3,CDH13,DMTN,PTK2B,MAPT,PPP3CC
3_Member	GO Biological Processes	GO:0022898	regulation of transmembrane transporter activity	-3.48422	-2.05308	9/268	88,781,801,805,808,2185,7402,9456,53826	ACTN2,CACNA2D1,CALM1,CALM2,CALM3,PTK2B,UTRN,HOMER1,FXYD6
3_Member	GO Biological Processes	GO:0051282	regulation of sequestering of calcium ion	-3.47687	-2.04738	6/115	801,805,808,2185,7070,7442	CALM1,CALM2,CALM3,PTK2B,THY1,TRPV1
3_Member	KEGG Pathway	ko04971	Gastric acid secretion	-3.46509	-2.03662	5/75	801,805,808,5582,7430	CALM1,CALM2,CALM3,PRKCG,EZR
3_Member	KEGG Pathway	ko04022	cGMP-PKG signaling pathway	-3.45168	-2.02626	7/163	291,293,801,805,808,5138,5533	SLC25A4,SLC25A6,CALM1,CALM2,CALM3,PDE2A,PPP3CC
3_Member	GO Biological Processes	GO:0051279	regulation of release of sequestered calcium ion into cytosol	-3.43834	-2.01545	5/76	801,805,808,2185,7070	CALM1,CALM2,CALM3,PTK2B,THY1
3_Member	GO Biological Processes	GO:0010523	negative regulation of calcium ion transport into cytosol	-3.42375	-2.00386	3/18	801,805,808	CALM1,CALM2,CALM3
3_Member	GO Biological Processes	GO:0051928	positive regulation of calcium ion transport	-3.41689	-1.998	6/118	781,801,805,808,7070,9456	CACNA2D1,CALM1,CALM2,CALM3,THY1,HOMER1
3_Member	KEGG Pathway	hsa04971	Gastric acid secretion	-3.41199	-1.99509	5/77	801,805,808,5582,7430	CALM1,CALM2,CALM3,PRKCG,EZR
3_Member	GO Biological Processes	GO:0051208	sequestering of calcium ion	-3.39729	-1.98138	6/119	801,805,808,2185,7070,7442	CALM1,CALM2,CALM3,PTK2B,THY1,TRPV1
3_Member	GO Biological Processes	GO:0060401	cytosolic calcium ion transport	-3.37269	-1.96268	7/168	781,801,805,808,2185,7070,7442	CACNA2D1,CALM1,CALM2,CALM3,PTK2B,THY1,TRPV1
3_Member	GO Biological Processes	GO:0090151	establishment of protein localization to mitochondrial membrane	-3.35168	-1.94557	3/19	801,808,8546	CALM1,CALM3,AP3B1
3_Member	Reactome Gene Sets	R-HSA-8876725	Protein methylation	-3.35168	-1.94557	3/19	801,805,808	CALM1,CALM2,CALM3
3_Member	GO Biological Processes	GO:0035307	positive regulation of protein dephosphorylation	-3.33824	-1.9331	4/45	801,805,808,5478	CALM1,CALM2,CALM3,PPIA
3_Member	GO Biological Processes	GO:0032409	regulation of transporter activity	-3.31278	-1.91148	9/283	88,781,801,805,808,2185,7402,9456,53826	ACTN2,CACNA2D1,CALM1,CALM2,CALM3,PTK2B,UTRN,HOMER1,FXYD6
3_Member	KEGG Pathway	hsa04022	cGMP-PKG signaling pathway	-3.29648	-1.899	7/173	291,293,801,805,808,5138,5533	SLC25A4,SLC25A6,CALM1,CALM2,CALM3,PDE2A,PPP3CC
3_Member	KEGG Pathway	ko04925	Aldosterone synthesis and secretion	-3.28582	-1.88976	5/82	801,805,808,5138,5582	CALM1,CALM2,CALM3,PDE2A,PRKCG
3_Member	Reactome Gene Sets	R-HSA-8978934	Metabolism of cofactors	-3.28366	-1.88896	3/20	801,805,808	CALM1,CALM2,CALM3
3_Member	GO Biological Processes	GO:2001257	regulation of cation channel activity	-3.28156	-1.88833	7/174	88,781,801,805,808,2185,9456	ACTN2,CACNA2D1,CALM1,CALM2,CALM3,PTK2B,HOMER1
3_Member	GO Biological Processes	GO:0072503	cellular divalent inorganic cation homeostasis	-3.27126	-1.87943	12/481	781,801,805,808,2185,3146,4035,7070,7442,8546,8943,9900	CACNA2D1,CALM1,CALM2,CALM3,PTK2B,HMGB1,LRP1,THY1,TRPV1,AP3B1,AP3D1,SV2A
3_Member	GO Biological Processes	GO:0010799	regulation of peptidyl-threonine phosphorylation	-3.23045	-1.84605	4/48	801,805,808,2039	CALM1,CALM2,CALM3,DMTN
3_Member	GO Biological Processes	GO:0032516	positive regulation of phosphoprotein phosphatase activity	-3.21928	-1.83901	3/21	801,805,808	CALM1,CALM2,CALM3
3_Member	GO Biological Processes	GO:0097366	response to bronchodilator	-3.19617	-1.81954	4/49	358,801,808,6647	AQP1,CALM1,CALM3,SOD1
3_Member	GO Biological Processes	GO:0016311	dephosphorylation	-3.18525	-1.81042	12/492	801,805,808,5208,5478,5533,6714,9647,29085,30833,64077,221294	CALM1,CALM2,CALM3,PFKFB2,PPIA,PPP3CC,SRC,PPM1F,PHPT1,NT5C,LHPP,NT5DC1
3_Member	GO Biological Processes	GO:0010881	regulation of cardiac muscle contraction by regulation of the release of sequestered calcium ion	-3.15817	-1.78693	3/22	801,805,808	CALM1,CALM2,CALM3
3_Member	GO Biological Processes	GO:0055065	metal ion homeostasis	-3.12737	-1.75969	14/645	781,801,805,808,2185,3146,4035,6647,7070,7442,8546,8943,9900,56898	CACNA2D1,CALM1,CALM2,CALM3,PTK2B,HMGB1,LRP1,SOD1,THY1,TRPV1,AP3B1,AP3D1,SV2A,BDH2
3_Member	GO Biological Processes	GO:0072507	divalent inorganic cation homeostasis	-3.12437	-1.75732	12/500	781,801,805,808,2185,3146,4035,7070,7442,8546,8943,9900	CACNA2D1,CALM1,CALM2,CALM3,PTK2B,HMGB1,LRP1,THY1,TRPV1,AP3B1,AP3D1,SV2A
3_Member	GO Biological Processes	GO:0006875	cellular metal ion homeostasis	-3.11499	-1.74996	13/573	781,801,805,808,2185,3146,4035,6647,7070,7442,8546,8943,9900	CACNA2D1,CALM1,CALM2,CALM3,PTK2B,HMGB1,LRP1,SOD1,THY1,TRPV1,AP3B1,AP3D1,SV2A
3_Member	GO Biological Processes	GO:0050999	regulation of nitric-oxide synthase activity	-3.09785	-1.73546	4/52	801,808,2185,6271	CALM1,CALM3,PTK2B,S100A1
3_Member	GO Biological Processes	GO:0055080	cation homeostasis	-3.08353	-1.72157	15/728	534,781,801,805,808,2185,3146,4035,6647,7070,7442,8546,8943,9900,56898	ATP6V1G2,CACNA2D1,CALM1,CALM2,CALM3,PTK2B,HMGB1,LRP1,SOD1,THY1,TRPV1,AP3B1,AP3D1,SV2A,BDH2
3_Member	GO Biological Processes	GO:0030003	cellular cation homeostasis	-3.07593	-1.71563	14/653	534,781,801,805,808,2185,3146,4035,6647,7070,7442,8546,8943,9900	ATP6V1G2,CACNA2D1,CALM1,CALM2,CALM3,PTK2B,HMGB1,LRP1,SOD1,THY1,TRPV1,AP3B1,AP3D1,SV2A
3_Member	GO Biological Processes	GO:0010524	positive regulation of calcium ion transport into cytosol	-3.06648	-1.70844	4/53	801,805,808,7070	CALM1,CALM2,CALM3,THY1
3_Member	KEGG Pathway	ko04912	GnRH signaling pathway	-3.058	-1.70126	5/92	801,805,808,2185,6714	CALM1,CALM2,CALM3,PTK2B,SRC
3_Member	GO Biological Processes	GO:0007204	positive regulation of cytosolic calcium ion concentration	-3.03182	-1.67938	9/310	781,801,805,808,2185,3146,4035,7070,7442	CACNA2D1,CALM1,CALM2,CALM3,PTK2B,HMGB1,LRP1,THY1,TRPV1
3_Member	GO Biological Processes	GO:0098771	inorganic ion homeostasis	-3.02419	-1.6726	15/738	534,781,801,805,808,2185,3146,4035,6647,7070,7442,8546,8943,9900,56898	ATP6V1G2,CACNA2D1,CALM1,CALM2,CALM3,PTK2B,HMGB1,LRP1,SOD1,THY1,TRPV1,AP3B1,AP3D1,SV2A,BDH2
3_Member	GO Biological Processes	GO:0010522	regulation of calcium ion transport into cytosol	-2.99517	-1.64952	5/95	801,805,808,2185,7070	CALM1,CALM2,CALM3,PTK2B,THY1
3_Member	GO Biological Processes	GO:0006873	cellular ion homeostasis	-2.9943	-1.64907	14/666	534,781,801,805,808,2185,3146,4035,6647,7070,7442,8546,8943,9900	ATP6V1G2,CACNA2D1,CALM1,CALM2,CALM3,PTK2B,HMGB1,LRP1,SOD1,THY1,TRPV1,AP3B1,AP3D1,SV2A
3_Member	GO Biological Processes	GO:0086064	cell communication by electrical coupling involved in cardiac conduction	-2.99164	-1.64767	3/25	801,805,808	CALM1,CALM2,CALM3
3_Member	GO Biological Processes	GO:0051353	positive regulation of oxidoreductase activity	-2.97619	-1.6339	4/56	801,808,2185,6271	CALM1,CALM3,PTK2B,S100A1
3_Member	Reactome Gene Sets	R-HSA-5578775	Ion homeostasis	-2.97619	-1.6339	4/56	801,805,808,53826	CALM1,CALM2,CALM3,FXYD6
3_Member	Reactome Gene Sets	R-HSA-936837	Ion transport by P-type ATPases	-2.97619	-1.6339	4/56	801,805,808,53826	CALM1,CALM2,CALM3,FXYD6
3_Member	Reactome Gene Sets	R-HSA-397014	Muscle contraction	-2.96475	-1.62413	7/197	88,801,805,808,4637,7171,53826	ACTN2,CALM1,CALM2,CALM3,MYL6,TPM4,FXYD6
3_Member	GO Biological Processes	GO:1903169	regulation of calcium ion transmembrane transport	-2.96221	-1.62325	6/144	781,801,805,808,2185,7070	CACNA2D1,CALM1,CALM2,CALM3,PTK2B,THY1
3_Member	GO Biological Processes	GO:1904064	positive regulation of cation transmembrane transport	-2.96221	-1.62325	6/144	88,781,801,805,808,7070	ACTN2,CACNA2D1,CALM1,CALM2,CALM3,THY1
3_Member	GO Biological Processes	GO:0060314	regulation of ryanodine-sensitive calcium-release channel activity	-2.94095	-1.60488	3/26	801,805,808	CALM1,CALM2,CALM3
3_Member	GO Biological Processes	GO:0086065	cell communication involved in cardiac conduction	-2.91896	-1.58577	4/58	781,801,805,808	CACNA2D1,CALM1,CALM2,CALM3
3_Member	KEGG Pathway	hsa04912	GnRH signaling pathway	-2.91489	-1.58292	5/99	801,805,808,2185,6714	CALM1,CALM2,CALM3,PTK2B,SRC
3_Member	KEGG Pathway	hsa04713	circadian entrainment	-2.89541	-1.56629	5/100	801,805,808,5582,114787	CALM1,CALM2,CALM3,PRKCG,GPRIN1
3_Member	GO Biological Processes	GO:0010882	regulation of cardiac muscle contraction by calcium ion signaling	-2.89235	-1.56405	3/27	801,805,808	CALM1,CALM2,CALM3
3_Member	KEGG Pathway	hsa04925	aldosterone synthesis and secretion	-2.85711	-1.53364	5/102	801,805,808,5138,5582	CALM1,CALM2,CALM3,PDE2A,PRKCG
3_Member	KEGG Pathway	ko04744	Phototransduction	-2.84569	-1.52381	3/28	801,805,808	CALM1,CALM2,CALM3
3_Member	GO Biological Processes	GO:0032414	positive regulation of ion transmembrane transporter activity	-2.8383	-1.51811	5/103	88,781,801,805,808	ACTN2,CACNA2D1,CALM1,CALM2,CALM3
3_Member	KEGG Pathway	ko04922	Glucagon signaling pathway	-2.8383	-1.51811	5/103	801,805,808,5224,5533	CALM1,CALM2,CALM3,PGAM2,PPP3CC
3_Member	Reactome Gene Sets	R-HSA-8986944	Transcriptional Regulation by MECP2	-2.81089	-1.49535	4/62	801,805,808,114787	CALM1,CALM2,CALM3,GPRIN1
3_Member	GO Biological Processes	GO:0010880	regulation of release of sequestered calcium ion into cytosol by sarcoplasmic reticulum	-2.80082	-1.48763	3/29	801,805,808	CALM1,CALM2,CALM3
3_Member	KEGG Pathway	hsa04625	c-type lectin receptor signaling pathway	-2.76511	-1.45735	5/107	801,805,808,5533,6714	CALM1,CALM2,CALM3,PPP3CC,SRC
3_Member	KEGG Pathway	hsa04922	Glucagon signaling pathway	-2.76511	-1.45735	5/107	801,805,808,5224,5533	CALM1,CALM2,CALM3,PGAM2,PPP3CC
3_Member	GO Biological Processes	GO:0032768	regulation of monooxygenase activity	-2.75978	-1.45599	4/64	801,808,2185,6271	CALM1,CALM3,PTK2B,S100A1
3_Member	KEGG Pathway	ko05214	Glioma	-2.75978	-1.45599	4/64	801,805,808,5582	CALM1,CALM2,CALM3,PRKCG
3_Member	GO Biological Processes	GO:0001975	response to amphetamine	-2.75761	-1.45599	3/30	801,808,6647	CALM1,CALM3,SOD1
3_Member	GO Biological Processes	GO:0010800	positive regulation of peptidyl-threonine phosphorylation	-2.75761	-1.45599	3/30	801,805,808	CALM1,CALM2,CALM3
3_Member	Reactome Gene Sets	R-HSA-418360	Platelet calcium homeostasis	-2.75761	-1.45599	3/30	801,805,808	CALM1,CALM2,CALM3
3_Member	GO Biological Processes	GO:0034765	regulation of ion transmembrane transport	-2.75625	-1.45539	11/479	88,781,801,805,808,1804,2185,7070,7402,9456,53826	ACTN2,CACNA2D1,CALM1,CALM2,CALM3,DPP6,PTK2B,THY1,UTRN,HOMER1,FXYD6
3_Member	GO Biological Processes	GO:0034767	positive regulation of ion transmembrane transport	-2.74246	-1.44312	6/159	88,781,801,805,808,7070	ACTN2,CACNA2D1,CALM1,CALM2,CALM3,THY1
3_Member	GO Biological Processes	GO:0051480	regulation of cytosolic calcium ion concentration	-2.71214	-1.41694	9/345	781,801,805,808,2185,3146,4035,7070,7442	CACNA2D1,CALM1,CALM2,CALM3,PTK2B,HMGB1,LRP1,THY1,TRPV1
3_Member	GO Biological Processes	GO:0032411	positive regulation of transporter activity	-2.67802	-1.39057	5/112	88,781,801,805,808	ACTN2,CACNA2D1,CALM1,CALM2,CALM3
3_Member	GO Biological Processes	GO:0010644	cell communication by electrical coupling	-2.67576	-1.39057	3/32	801,805,808	CALM1,CALM2,CALM3
3_Member	GO Biological Processes	GO:0050849	negative regulation of calcium-mediated signaling	-2.67576	-1.39057	3/32	801,805,808	CALM1,CALM2,CALM3
3_Member	GO Biological Processes	GO:0051385	response to mineralocorticoid	-2.67576	-1.39057	3/32	801,808,6714	CALM1,CALM3,SRC
3_Member	Reactome Gene Sets	R-HSA-451326	Activation of kainate receptors upon glutamate binding	-2.67576	-1.39057	3/32	801,805,808	CALM1,CALM2,CALM3
3_Member	Reactome Gene Sets	R-HSA-983695	Antigen activates B Cell Receptor (BCR) leading to generation of second messengers	-2.67576	-1.39057	3/32	801,805,808	CALM1,CALM2,CALM3
3_Member	KEGG Pathway	hsa04744	Phototransduction	-2.67576	-1.39057	3/32	801,805,808	CALM1,CALM2,CALM3
3_Member	WikiPathways	WP4685	Melanoma	-2.66276	-1.38013	4/68	801,805,808,5879	CALM1,CALM2,CALM3,RAC1
3_Member	GO Biological Processes	GO:0003015	heart process	-2.64197	-1.36189	8/287	781,801,805,808,6271,6647,6714,53826	CACNA2D1,CALM1,CALM2,CALM3,S100A1,SOD1,SRC,FXYD6
3_Member	GO Biological Processes	GO:0010922	positive regulation of phosphatase activity	-2.63692	-1.36008	3/33	801,805,808	CALM1,CALM2,CALM3
3_Member	GO Biological Processes	GO:0014808	release of sequestered calcium ion into cytosol by sarcoplasmic reticulum	-2.63692	-1.36008	3/33	801,805,808	CALM1,CALM2,CALM3
3_Member	Reactome Gene Sets	R-HSA-2871809	FCERI mediated Ca+2 mobilization	-2.63692	-1.36008	3/33	801,805,808	CALM1,CALM2,CALM3
3_Member	Reactome Gene Sets	R-HSA-9022692	Regulation of MECP2 expression and activity	-2.63692	-1.36008	3/33	801,805,808	CALM1,CALM2,CALM3
3_Member	GO Biological Processes	GO:1901020	negative regulation of calcium ion transmembrane transporter activity	-2.59935	-1.32645	3/34	801,805,808	CALM1,CALM2,CALM3
3_Member	GO Biological Processes	GO:1901385	regulation of voltage-gated calcium channel activity	-2.59935	-1.32645	3/34	781,801,808	CACNA2D1,CALM1,CALM3
3_Member	GO Biological Processes	GO:1903514	release of sequestered calcium ion into cytosol by endoplasmic reticulum	-2.59935	-1.32645	3/34	801,805,808	CALM1,CALM2,CALM3
3_Member	Reactome Gene Sets	R-HSA-5576892	Phase 0 - rapid depolarisation	-2.59935	-1.32645	3/34	801,805,808	CALM1,CALM2,CALM3
3_Member	GO Biological Processes	GO:0018107	peptidyl-threonine phosphorylation	-2.57939	-1.31074	5/118	801,805,808,2039,5591	CALM1,CALM2,CALM3,DMTN,PRKDC
3_Member	GO Biological Processes	GO:0006941	striated muscle contraction	-2.55907	-1.29394	6/173	781,801,805,808,5224,9456	CACNA2D1,CALM1,CALM2,CALM3,PGAM2,HOMER1
3_Member	KEGG Pathway	hsa04218	cellular senescence	-2.55907	-1.29394	6/173	291,293,801,805,808,5533	SLC25A4,SLC25A6,CALM1,CALM2,CALM3,PPP3CC
3_Member	GO Biological Processes	GO:0032413	negative regulation of ion transmembrane transporter activity	-2.55026	-1.28826	4/73	88,801,805,808	ACTN2,CALM1,CALM2,CALM3
3_Member	GO Biological Processes	GO:1903779	regulation of cardiac conduction	-2.55026	-1.28826	4/73	801,805,808,53826	CALM1,CALM2,CALM3,FXYD6
3_Member	KEGG Pathway	ko04270	Vascular smooth muscle contraction	-2.53229	-1.27306	5/121	801,805,808,4637,5582	CALM1,CALM2,CALM3,MYL6,PRKCG
3_Member	Reactome Gene Sets	R-HSA-2514859	Inactivation, recovery and regulation of the phototransduction cascade	-2.52774	-1.27058	3/36	801,805,808	CALM1,CALM2,CALM3
3_Member	GO Biological Processes	GO:0046777	protein autophosphorylation	-2.52083	-1.26435	7/236	801,805,808,2185,5582,6714,8826	CALM1,CALM2,CALM3,PTK2B,PRKCG,SRC,IQGAP1
3_Member	GO Biological Processes	GO:0051924	regulation of calcium ion transport	-2.50062	-1.24689	7/238	781,801,805,808,2185,7070,9456	CACNA2D1,CALM1,CALM2,CALM3,PTK2B,THY1,HOMER1
3_Member	GO Biological Processes	GO:0006874	cellular calcium ion homeostasis	-2.49902	-1.24562	10/443	781,801,805,808,2185,3146,4035,7070,7442,9900	CACNA2D1,CALM1,CALM2,CALM3,PTK2B,HMGB1,LRP1,THY1,TRPV1,SV2A
3_Member	Reactome Gene Sets	R-HSA-2514856	The phototransduction cascade	-2.49356	-1.24085	3/37	801,805,808	CALM1,CALM2,CALM3
3_Member	KEGG Pathway	ko05152	Tuberculosis	-2.48601	-1.235	6/179	637,801,805,808,5533,6714	BID,CALM1,CALM2,CALM3,PPP3CC,SRC
3_Member	Reactome Gene Sets	R-HSA-9009391	Extra-nuclear estrogen signaling	-2.46644	-1.21643	4/77	801,805,808,6714	CALM1,CALM2,CALM3,SRC
3_Member	KEGG Pathway	hsa05214	Glioma	-2.44626	-1.19828	4/78	801,805,808,5582	CALM1,CALM2,CALM3,PRKCG
3_Member	GO Biological Processes	GO:0018210	peptidyl-threonine modification	-2.44214	-1.19517	5/127	801,805,808,2039,5591	CALM1,CALM2,CALM3,DMTN,PRKDC
3_Member	GO Biological Processes	GO:1903170	negative regulation of calcium ion transmembrane transport	-2.42817	-1.18366	3/39	801,805,808	CALM1,CALM2,CALM3
3_Member	GO Biological Processes	GO:0055074	calcium ion homeostasis	-2.41742	-1.17545	10/455	781,801,805,808,2185,3146,4035,7070,7442,9900	CACNA2D1,CALM1,CALM2,CALM3,PTK2B,HMGB1,LRP1,THY1,TRPV1,SV2A
3_Member	KEGG Pathway	ko04728	Dopaminergic synapse	-2.39897	-1.15966	5/130	801,805,808,5533,5582	CALM1,CALM2,CALM3,PPP3CC,PRKCG
3_Member	GO Biological Processes	GO:0070296	sarcoplasmic reticulum calcium ion transport	-2.39686	-1.15918	3/40	801,805,808	CALM1,CALM2,CALM3
3_Member	WikiPathways	WP500	Glycogen Synthesis and Degradation	-2.39686	-1.15918	3/40	801,805,808	CALM1,CALM2,CALM3
3_Member	GO Biological Processes	GO:0043269	regulation of ion transport	-2.37782	-1.14272	13/696	88,781,801,805,808,1804,2185,6623,7070,7402,9456,9900,53826	ACTN2,CACNA2D1,CALM1,CALM2,CALM3,DPP6,PTK2B,SNCG,THY1,UTRN,HOMER1,SV2A,FXYD6
3_Member	KEGG Pathway	hsa04728	Dopaminergic synapse	-2.37086	-1.13711	5/132	801,805,808,5533,5582	CALM1,CALM2,CALM3,PPP3CC,PRKCG
3_Member	GO Biological Processes	GO:0032410	negative regulation of transporter activity	-2.34969	-1.12015	4/83	88,801,805,808	ACTN2,CALM1,CALM2,CALM3
3_Member	GO Biological Processes	GO:1901019	regulation of calcium ion transmembrane transporter activity	-2.34969	-1.12015	4/83	781,801,805,808	CACNA2D1,CALM1,CALM2,CALM3
3_Member	KEGG Pathway	hsa05152	Tuberculosis	-2.33775	-1.10918	6/192	637,801,805,808,5533,6714	BID,CALM1,CALM2,CALM3,PPP3CC,SRC
3_Member	GO Biological Processes	GO:0014075	response to amine	-2.33675	-1.10915	3/42	801,808,6647	CALM1,CALM3,SOD1
3_Member	GO Biological Processes	GO:0006470	protein dephosphorylation	-2.30816	-1.08471	8/326	801,805,808,5478,5533,9647,29085,64077	CALM1,CALM2,CALM3,PPIA,PPP3CC,PPM1F,PHPT1,LHPP
3_Member	KEGG Pathway	hsa04270	Vascular smooth muscle contraction	-2.30277	-1.07964	5/137	801,805,808,4637,5582	CALM1,CALM2,CALM3,MYL6,PRKCG
3_Member	WikiPathways	WP4756	Renin Angiotensin Aldosterone System (RAAS)	-2.27976	-1.06073	3/44	801,805,808	CALM1,CALM2,CALM3
3_Member	GO Biological Processes	GO:1904063	negative regulation of cation transmembrane transport	-2.25965	-1.04344	4/88	88,801,805,808	ACTN2,CALM1,CALM2,CALM3
3_Member	Reactome Gene Sets	R-HSA-418346	Platelet homeostasis	-2.25965	-1.04344	4/88	801,805,808,5138	CALM1,CALM2,CALM3,PDE2A
3_Member	GO Biological Processes	GO:0006816	calcium ion transport	-2.22861	-1.01552	9/409	781,801,805,808,2185,6520,7070,7442,9456	CACNA2D1,CALM1,CALM2,CALM3,PTK2B,SLC3A2,THY1,TRPV1,HOMER1
3_Member	KEGG Pathway	ko04970	Salivary secretion	-2.22529	-1.01406	4/90	801,805,808,5582	CALM1,CALM2,CALM3,PRKCG
3_Member	GO Biological Processes	GO:0034762	regulation of transmembrane transport	-2.21675	-1.00614	11/565	88,781,801,805,808,1804,2185,7070,7402,9456,53826	ACTN2,CACNA2D1,CALM1,CALM2,CALM3,DPP6,PTK2B,THY1,UTRN,HOMER1,FXYD6
3_Member	KEGG Pathway	ko04261	Adrenergic signaling in cardiomyocytes	-2.21239	-1.0024	5/144	781,801,805,808,7171	CACNA2D1,CALM1,CALM2,CALM3,TPM4
3_Member	GO Biological Processes	GO:2001258	negative regulation of cation channel activity	-2.19947	-0.992546	3/47	801,805,808	CALM1,CALM2,CALM3
3_Member	KEGG Pathway	hsa04261	Adrenergic signaling in cardiomyocytes	-2.1753	-0.971123	5/147	781,801,805,808,7171	CACNA2D1,CALM1,CALM2,CALM3,TPM4
3_Member	GO Biological Processes	GO:0034764	positive regulation of transmembrane transport	-2.17188	-0.968612	6/208	88,781,801,805,808,7070	ACTN2,CACNA2D1,CALM1,CALM2,CALM3,THY1
3_Member	KEGG Pathway	hsa04970	Salivary secretion	-2.1592	-0.957447	4/94	801,805,808,5582	CALM1,CALM2,CALM3,PRKCG
3_Member	GO Biological Processes	GO:0043271	negative regulation of ion transport	-2.15109	-0.951146	5/149	88,801,805,808,2185	ACTN2,CALM1,CALM2,CALM3,PTK2B
3_Member	GO Biological Processes	GO:0060047	heart contraction	-2.14627	-0.948138	7/277	781,801,805,808,6271,6647,53826	CACNA2D1,CALM1,CALM2,CALM3,S100A1,SOD1,FXYD6
3_Member	GO Biological Processes	GO:0061337	cardiac conduction	-2.13913	-0.94249	5/150	781,801,805,808,53826	CACNA2D1,CALM1,CALM2,CALM3,FXYD6
3_Member	GO Biological Processes	GO:0043270	positive regulation of ion transport	-2.12992	-0.934173	7/279	88,781,801,805,808,7070,9456	ACTN2,CACNA2D1,CALM1,CALM2,CALM3,THY1,HOMER1
3_Member	GO Biological Processes	GO:0002027	regulation of heart rate	-2.11177	-0.920476	4/97	781,801,805,808	CACNA2D1,CALM1,CALM2,CALM3
3_Member	GO Biological Processes	GO:0034766	negative regulation of ion transmembrane transport	-2.09634	-0.907113	4/98	88,801,805,808	ACTN2,CALM1,CALM2,CALM3
3_Member	KEGG Pathway	ko04915	Estrogen signaling pathway	-2.09634	-0.907113	4/98	801,805,808,6714	CALM1,CALM2,CALM3,SRC
3_Member	WikiPathways	WP289	Myometrial Relaxation and Contraction Pathways	-2.05812	-0.874151	5/157	801,805,808,5333,5582	CALM1,CALM2,CALM3,PLCD1,PRKCG
3_Member	KEGG Pathway	ko04916	Melanogenesis	-2.05117	-0.870091	4/101	801,805,808,5582	CALM1,CALM2,CALM3,PRKCG
3_Member	GO Biological Processes	GO:0008015	blood circulation	-2.02469	-0.848774	10/520	781,801,805,808,1278,5138,6271,6647,6714,53826	CACNA2D1,CALM1,CALM2,CALM3,COL1A2,PDE2A,S100A1,SOD1,SRC,FXYD6
4_Summary	Reactome Gene Sets	R-HSA-9675108	Nervous system development	-11.0854	-7.41003	25/576	102,214,1211,1212,2596,2817,4637,5217,5361,5700,5716,5879,6133,6233,6714,7311,7314,7316,7402,7430,10752,55740,84617,84790,375790,801,805,808,5582,1778,1780,10226,400,1278,4035,8546,27342,29978,54732,84251,5478,22919,2670,5886,4904,88,7450,8826,9693,291,293,2185,6647,219771,2173,7347,8239,4345,7087,10384,637,3146,4137,5339,5533,6285,5591,80349,8359,2023,2950,7070,26960,318,534,1465,9588,5208,6804,…	ADAM10,ALCAM,CLTA,CLTB,GAP43,GPC1,MYL6,PFN2,PLXNA1,PSMC1,PSMD10,RAC1,RPL9,RPS27A,SRC,UBA52,UBB,UBC,UTRN,EZR,CHL1,ENAH,TUBB6,TUBA1C,AGRN,CALM1,CALM2,CALM3,PRKCG,DYNC1H1,DYNC1I1,PLIN3,ARL1,COL1A2,LRP1,AP3B1,RABGEF1,UBQLN2,TMED9,SGIP1,PPIA,MAPRE1,GFAP,RAD23A,YBX1,ACTN2,VWF,IQGAP1,RAPGEF2,SLC25A4,SLC25A6,PTK2B,SOD1,CCNY,FABP7,UCHL3,USP9X,CD200,ICAM5,BTN3A3,BID,HMGB1,MAPT,PLEC,PPP3CC,S100B,PRKDC,WDR61…
4_Member	Reactome Gene Sets	R-HSA-9675108	Nervous system development	-11.0854	-7.41003	25/576	102,214,1211,1212,2596,2817,4637,5217,5361,5700,5716,5879,6133,6233,6714,7311,7314,7316,7402,7430,10752,55740,84617,84790,375790	ADAM10,ALCAM,CLTA,CLTB,GAP43,GPC1,MYL6,PFN2,PLXNA1,PSMC1,PSMD10,RAC1,RPL9,RPS27A,SRC,UBA52,UBB,UBC,UTRN,EZR,CHL1,ENAH,TUBB6,TUBA1C,AGRN
4_Member	Reactome Gene Sets	R-HSA-422475	Axon guidance	-10.6884	-7.32946	24/551	102,214,1211,1212,2596,2817,4637,5217,5361,5700,5716,5879,6133,6233,6714,7311,7314,7316,7430,10752,55740,84617,84790,375790	ADAM10,ALCAM,CLTA,CLTB,GAP43,GPC1,MYL6,PFN2,PLXNA1,PSMC1,PSMD10,RAC1,RPL9,RPS27A,SRC,UBA52,UBB,UBC,EZR,CHL1,ENAH,TUBB6,TUBA1C,AGRN
4_Member	Reactome Gene Sets	R-HSA-3858494	Beta-catenin independent WNT signaling	-9.71595	-6.69947	13/146	801,805,808,1211,1212,5582,5700,5716,5879,6233,7311,7314,7316	CALM1,CALM2,CALM3,CLTA,CLTB,PRKCG,PSMC1,PSMD10,RAC1,RPS27A,UBA52,UBB,UBC
4_Member	Reactome Gene Sets	R-HSA-9663891	Selective autophagy	-8.99881	-6.17138	10/81	1778,1780,6233,6714,7311,7314,7316,10226,84617,84790	DYNC1H1,DYNC1I1,RPS27A,SRC,UBA52,UBB,UBC,PLIN3,TUBB6,TUBA1C
4_Member	Reactome Gene Sets	R-HSA-5653656	Vesicle-mediated transport	-8.93268	-6.13008	24/673	400,801,805,808,1211,1212,1278,1778,1780,4035,5879,6233,6714,7311,7314,7316,8546,10226,27342,29978,54732,84251,84617,84790	ARL1,CALM1,CALM2,CALM3,CLTA,CLTB,COL1A2,DYNC1H1,DYNC1I1,LRP1,RAC1,RPS27A,SRC,UBA52,UBB,UBC,AP3B1,PLIN3,RABGEF1,UBQLN2,TMED9,SGIP1,TUBB6,TUBA1C
4_Member	Reactome Gene Sets	R-HSA-1168372	Downstream signaling events of B Cell Receptor (BCR)	-8.89262	-6.10191	10/83	801,805,808,5478,5700,5716,6233,7311,7314,7316	CALM1,CALM2,CALM3,PPIA,PSMC1,PSMD10,RPS27A,UBA52,UBB,UBC
4_Member	Reactome Gene Sets	R-HSA-9648002	RAS processing	-8.83048	-6.06264	7/27	801,805,808,6233,7311,7314,7316	CALM1,CALM2,CALM3,RPS27A,UBA52,UBB,UBC
4_Member	Reactome Gene Sets	R-HSA-9646399	Aggrephagy	-8.77361	-6.03795	8/43	1778,1780,6233,7311,7314,7316,84617,84790	DYNC1H1,DYNC1I1,RPS27A,UBA52,UBB,UBC,TUBB6,TUBA1C
4_Member	Reactome Gene Sets	R-HSA-8982491	Glycogen metabolism	-8.59146	-5.87601	7/29	801,805,808,6233,7311,7314,7316	CALM1,CALM2,CALM3,RPS27A,UBA52,UBB,UBC
4_Member	Reactome Gene Sets	R-HSA-4086400	PCP/CE pathway	-8.44786	-5.78793	10/92	1211,1212,5582,5700,5716,5879,6233,7311,7314,7316	CLTA,CLTB,PRKCG,PSMC1,PSMD10,RAC1,RPS27A,UBA52,UBB,UBC
4_Member	Reactome Gene Sets	R-HSA-1253288	Downregulation of ERBB4 signaling	-8.41543	-5.77317	5/9	6233,6714,7311,7314,7316	RPS27A,SRC,UBA52,UBB,UBC
4_Member	Reactome Gene Sets	R-HSA-8876493	InlA-mediated entry of Listeria monocytogenes into host cells	-8.41543	-5.77317	5/9	6233,6714,7311,7314,7316	RPS27A,SRC,UBA52,UBB,UBC
4_Member	Reactome Gene Sets	R-HSA-9683683	Maturation of protein E	-8.39968	-5.77317	4/4	6233,7311,7314,7316	RPS27A,UBA52,UBB,UBC
4_Member	Reactome Gene Sets	R-HSA-9694493	Maturation of protein E	-8.39968	-5.77317	4/4	6233,7311,7314,7316	RPS27A,UBA52,UBB,UBC
4_Member	Reactome Gene Sets	R-HSA-5607764	CLEC7A (Dectin-1) signaling	-8.04945	-5.55151	10/101	801,805,808,5700,5716,6233,6714,7311,7314,7316	CALM1,CALM2,CALM3,PSMC1,PSMD10,RPS27A,SRC,UBA52,UBB,UBC
4_Member	Reactome Gene Sets	R-HSA-199991	Membrane Trafficking	-8.00992	-5.52024	22/634	400,801,805,808,1211,1212,1778,1780,5879,6233,6714,7311,7314,7316,8546,10226,27342,29978,54732,84251,84617,84790	ARL1,CALM1,CALM2,CALM3,CLTA,CLTB,DYNC1H1,DYNC1I1,RAC1,RPS27A,SRC,UBA52,UBB,UBC,AP3B1,PLIN3,RABGEF1,UBQLN2,TMED9,SGIP1,TUBB6,TUBA1C
4_Member	Reactome Gene Sets	R-HSA-8852276	The role of GTSE1 in G2/M progression after G2 checkpoint	-7.94	-5.47872	9/77	5700,5716,6233,7311,7314,7316,22919,84617,84790	PSMC1,PSMD10,RPS27A,UBA52,UBB,UBC,MAPRE1,TUBB6,TUBA1C
4_Member	Reactome Gene Sets	R-HSA-9613829	Chaperone Mediated Autophagy	-7.78484	-5.37042	6/22	2670,6233,7311,7314,7316,10226	GFAP,RPS27A,UBA52,UBB,UBC,PLIN3
4_Member	Reactome Gene Sets	R-HSA-5689877	Josephin domain DUBs	-7.62559	-5.23637	5/12	5886,6233,7311,7314,7316	RAD23A,RPS27A,UBA52,UBB,UBC
4_Member	Reactome Gene Sets	R-HSA-983705	Signaling by the B Cell Receptor (BCR)	-7.61349	-5.2323	10/112	801,805,808,5478,5700,5716,6233,7311,7314,7316	CALM1,CALM2,CALM3,PPIA,PSMC1,PSMD10,RPS27A,UBA52,UBB,UBC
4_Member	Reactome Gene Sets	R-HSA-9013507	NOTCH3 Activation and Transmission of Signal to the Nucleus	-7.41814	-5.06356	6/25	102,4904,6233,7311,7314,7316	ADAM10,YBX1,RPS27A,UBA52,UBB,UBC
4_Member	Reactome Gene Sets	R-HSA-9612973	Autophagy	-7.39382	-5.05101	11/151	1778,1780,2670,6233,6714,7311,7314,7316,10226,84617,84790	DYNC1H1,DYNC1I1,GFAP,RPS27A,SRC,UBA52,UBB,UBC,PLIN3,TUBB6,TUBA1C
4_Member	Reactome Gene Sets	R-HSA-5683057	MAPK family signaling cascades	-7.18818	-4.8667	15/325	88,801,805,808,5700,5716,5879,6233,6714,7311,7314,7316,7450,8826,9693	ACTN2,CALM1,CALM2,CALM3,PSMC1,PSMD10,RAC1,RPS27A,SRC,UBA52,UBB,UBC,VWF,IQGAP1,RAPGEF2
4_Member	Reactome Gene Sets	R-HSA-5673001	RAF/MAP kinase cascade	-7.17183	-4.85431	14/280	88,801,805,808,5700,5716,6233,6714,7311,7314,7316,7450,8826,9693	ACTN2,CALM1,CALM2,CALM3,PSMC1,PSMD10,RPS27A,SRC,UBA52,UBB,UBC,VWF,IQGAP1,RAPGEF2
4_Member	Reactome Gene Sets	R-HSA-5684996	MAPK1/MAPK3 signaling	-7.05816	-4.76196	14/286	88,801,805,808,5700,5716,6233,6714,7311,7314,7316,7450,8826,9693	ACTN2,CALM1,CALM2,CALM3,PSMC1,PSMD10,RPS27A,SRC,UBA52,UBB,UBC,VWF,IQGAP1,RAPGEF2
4_Member	Reactome Gene Sets	R-HSA-2691230	Signaling by NOTCH1 HD Domain Mutants in Cancer	-7.05527	-4.76196	5/15	102,6233,7311,7314,7316	ADAM10,RPS27A,UBA52,UBB,UBC
4_Member	Reactome Gene Sets	R-HSA-2691232	Constitutive Signaling by NOTCH1 HD Domain Mutants	-7.05527	-4.76196	5/15	102,6233,7311,7314,7316	ADAM10,RPS27A,UBA52,UBB,UBC
4_Member	Reactome Gene Sets	R-HSA-162909	Host Interactions of HIV factors	-6.99506	-4.72252	10/130	291,293,5478,5700,5716,5879,6233,7311,7314,7316	SLC25A4,SLC25A6,PPIA,PSMC1,PSMD10,RAC1,RPS27A,UBA52,UBB,UBC
4_Member	GO Biological Processes	GO:0071902	positive regulation of protein serine/threonine kinase activity	-6.96681	-4.70133	15/338	801,805,808,2185,5478,5716,6233,6647,6714,7311,7314,7316,8826,9693,219771	CALM1,CALM2,CALM3,PTK2B,PPIA,PSMD10,RPS27A,SOD1,SRC,UBA52,UBB,UBC,IQGAP1,RAPGEF2,CCNY
4_Member	Reactome Gene Sets	R-HSA-9012852	Signaling by NOTCH3	-6.90977	-4.66561	7/49	102,2173,4904,6233,7311,7314,7316	ADAM10,FABP7,YBX1,RPS27A,UBA52,UBB,UBC
4_Member	Reactome Gene Sets	R-HSA-8866652	Synthesis of active ubiquitin: roles of E1 and E2 enzymes	-6.90725	-4.66561	6/30	6233,7311,7314,7316,7347,8239	RPS27A,UBA52,UBB,UBC,UCHL3,USP9X
4_Member	Reactome Gene Sets	R-HSA-1295596	Spry regulation of FGF signaling	-6.89538	-4.66498	5/16	6233,6714,7311,7314,7316	RPS27A,SRC,UBA52,UBB,UBC
4_Member	Reactome Gene Sets	R-HSA-175474	Assembly Of The HIV Virion	-6.89538	-4.66498	5/16	5478,6233,7311,7314,7316	PPIA,RPS27A,UBA52,UBB,UBC
4_Member	Reactome Gene Sets	R-HSA-2454202	Fc epsilon receptor (FCERI) signaling	-6.8708	-4.65105	10/134	801,805,808,5700,5716,5879,6233,7311,7314,7316	CALM1,CALM2,CALM3,PSMC1,PSMD10,RAC1,RPS27A,UBA52,UBB,UBC
4_Member	Reactome Gene Sets	R-HSA-9637628	Modulation by Mtb of host immune system	-6.86383	-4.65105	4/7	6233,7311,7314,7316	RPS27A,UBA52,UBB,UBC
4_Member	Reactome Gene Sets	R-HSA-9706377	FLT3 signaling by CBL mutants	-6.86383	-4.65105	4/7	6233,7311,7314,7316	RPS27A,UBA52,UBB,UBC
4_Member	Reactome Gene Sets	R-HSA-1632852	Macroautophagy	-6.81025	-4.60363	10/136	1778,1780,6233,6714,7311,7314,7316,10226,84617,84790	DYNC1H1,DYNC1I1,RPS27A,SRC,UBA52,UBB,UBC,PLIN3,TUBB6,TUBA1C
4_Member	Reactome Gene Sets	R-HSA-1280218	Adaptive Immune System	-6.67397	-4.48108	22/756	801,805,808,1211,1278,1778,1780,4345,5478,5700,5716,5879,6233,6714,7087,7311,7314,7316,10384,55740,84617,84790	CALM1,CALM2,CALM3,CLTA,COL1A2,DYNC1H1,DYNC1I1,CD200,PPIA,PSMC1,PSMD10,RAC1,RPS27A,SRC,ICAM5,UBA52,UBB,UBC,BTN3A3,ENAH,TUBB6,TUBA1C
4_Member	Reactome Gene Sets	R-HSA-376176	Signaling by ROBO receptors	-6.67266	-4.48108	12/218	2817,5217,5700,5716,5879,6133,6233,6714,7311,7314,7316,55740	GPC1,PFN2,PSMC1,PSMD10,RAC1,RPL9,RPS27A,SRC,UBA52,UBB,UBC,ENAH
4_Member	Reactome Gene Sets	R-HSA-109581	Apoptosis	-6.66469	-4.47605	11/178	637,3146,4137,5339,5533,5700,5716,6233,7311,7314,7316	BID,HMGB1,MAPT,PLEC,PPP3CC,PSMC1,PSMD10,RPS27A,UBA52,UBB,UBC
4_Member	Reactome Gene Sets	R-HSA-445989	TAK1 activates NFkB by phosphorylation and activation of IKKs complex	-6.6452	-4.46527	6/33	3146,6233,6285,7311,7314,7316	HMGB1,RPS27A,S100B,UBA52,UBB,UBC
4_Member	Reactome Gene Sets	R-HSA-5621481	C-type lectin receptors (CLRs)	-6.63449	-4.45743	10/142	801,805,808,5700,5716,6233,6714,7311,7314,7316	CALM1,CALM2,CALM3,PSMC1,PSMD10,RPS27A,SRC,UBA52,UBB,UBC
4_Member	Reactome Gene Sets	R-HSA-8852135	Protein ubiquitination	-6.62582	-4.4516	8/79	5591,6233,7311,7314,7316,7347,8239,80349	PRKDC,RPS27A,UBA52,UBB,UBC,UCHL3,USP9X,WDR61
4_Member	Reactome Gene Sets	R-HSA-8941858	Regulation of RUNX3 expression and activity	-6.55409	-4.39385	7/55	5700,5716,6233,6714,7311,7314,7316	PSMC1,PSMD10,RPS27A,SRC,UBA52,UBB,UBC
4_Member	Reactome Gene Sets	R-HSA-1236394	Signaling by ERBB4	-6.39217	-4.25598	7/58	2670,6233,6285,6714,7311,7314,7316	GFAP,RPS27A,S100B,SRC,UBA52,UBB,UBC
4_Member	Reactome Gene Sets	R-HSA-5357801	Programmed Cell Death	-6.38056	-4.24696	11/190	637,3146,4137,5339,5533,5700,5716,6233,7311,7314,7316	BID,HMGB1,MAPT,PLEC,PPP3CC,PSMC1,PSMD10,RPS27A,UBA52,UBB,UBC
4_Member	Reactome Gene Sets	R-HSA-2467813	Separation of Sister Chromatids	-6.35782	-4.2281	11/191	1778,1780,5700,5716,6233,7311,7314,7316,22919,84617,84790	DYNC1H1,DYNC1I1,PSMC1,PSMD10,RPS27A,UBA52,UBB,UBC,MAPRE1,TUBB6,TUBA1C
4_Member	Reactome Gene Sets	R-HSA-8876384	Listeria monocytogenes entry into host cells	-6.35655	-4.2281	5/20	6233,6714,7311,7314,7316	RPS27A,SRC,UBA52,UBB,UBC
4_Member	Reactome Gene Sets	R-HSA-3785653	Myoclonic epilepsy of Lafora	-6.313	-4.19961	4/9	6233,7311,7314,7316	RPS27A,UBA52,UBB,UBC
4_Member	Reactome Gene Sets	R-HSA-8849469	PTK6 Regulates RTKs and Their Effectors AKT1 and DOK1	-6.313	-4.19961	4/9	6233,7311,7314,7316	RPS27A,UBA52,UBB,UBC
4_Member	Reactome Gene Sets	R-HSA-8948747	Regulation of PTEN localization	-6.313	-4.19961	4/9	6233,7311,7314,7316	RPS27A,UBA52,UBB,UBC
4_Member	Reactome Gene Sets	R-HSA-9636383	Prevention of phagosomal-lysosomal fusion	-6.313	-4.19961	4/9	6233,7311,7314,7316	RPS27A,UBA52,UBB,UBC
4_Member	Reactome Gene Sets	R-HSA-195721	Signaling by WNT	-6.27191	-4.16828	14/332	801,805,808,1211,1212,5582,5700,5716,5879,6233,7311,7314,7316,8359	CALM1,CALM2,CALM3,CLTA,CLTB,PRKCG,PSMC1,PSMD10,RAC1,RPS27A,UBA52,UBB,UBC,H4C1
4_Member	Reactome Gene Sets	R-HSA-2979096	NOTCH2 Activation and Transmission of Signal to the Nucleus	-6.13215	-4.0497	5/22	102,6233,7311,7314,7316	ADAM10,RPS27A,UBA52,UBB,UBC
4_Member	Reactome Gene Sets	R-HSA-5663202	Diseases of signal transduction by growth factor receptors and second messengers	-6.10561	-4.02546	15/395	102,801,805,808,5700,5716,5879,6233,6714,7311,7314,7316,7450,8546,8826	ADAM10,CALM1,CALM2,CALM3,PSMC1,PSMD10,RAC1,RPS27A,SRC,UBA52,UBB,UBC,VWF,AP3B1,IQGAP1
4_Member	Reactome Gene Sets	R-HSA-937042	IRAK2 mediated activation of TAK1 complex	-6.09388	-4.01828	4/10	6233,7311,7314,7316	RPS27A,UBA52,UBB,UBC
4_Member	Reactome Gene Sets	R-HSA-2173795	Downregulation of SMAD2/3:SMAD4 transcriptional activity	-6.02852	-3.96408	5/23	6233,7311,7314,7316,8239	RPS27A,UBA52,UBB,UBC,USP9X
4_Member	Reactome Gene Sets	R-HSA-9637690	Response of Mtb to phagocytosis	-6.02852	-3.96408	5/23	2023,6233,7311,7314,7316	ENO1,RPS27A,UBA52,UBB,UBC
4_Member	GO Biological Processes	GO:0071900	regulation of protein serine/threonine kinase activity	-5.93413	-3.89527	17/521	801,805,808,2185,2950,5478,5716,6233,6647,6714,7070,7311,7314,7316,8826,9693,219771	CALM1,CALM2,CALM3,PTK2B,GSTP1,PPIA,PSMD10,RPS27A,SOD1,SRC,THY1,UBA52,UBB,UBC,IQGAP1,RAPGEF2,CCNY
4_Member	Reactome Gene Sets	R-HSA-9014325	TICAM1,TRAF6-dependent induction of TAK1 complex	-5.90032	-3.87587	4/11	6233,7311,7314,7316	RPS27A,UBA52,UBB,UBC
4_Member	Reactome Gene Sets	R-HSA-9645460	Alpha-protein kinase 1 signaling pathway	-5.90032	-3.87587	4/11	6233,7311,7314,7316	RPS27A,UBA52,UBB,UBC
4_Member	Reactome Gene Sets	R-HSA-9664873	Pexophagy	-5.90032	-3.87587	4/11	6233,7311,7314,7316	RPS27A,UBA52,UBB,UBC
4_Member	Reactome Gene Sets	R-HSA-9006925	Intracellular signaling by second messengers	-5.85183	-3.83337	13/309	801,805,808,5582,5700,5716,5879,6233,6714,7311,7314,7316,26960	CALM1,CALM2,CALM3,PRKCG,PSMC1,PSMD10,RAC1,RPS27A,SRC,UBA52,UBB,UBC,NBEA
4_Member	Reactome Gene Sets	R-HSA-8953897	Cellular responses to external stimuli	-5.75428	-3.74756	18/598	318,534,1465,1778,1780,2950,5700,5716,6133,6233,6647,7311,7314,7316,8359,9588,84617,84790	NUDT2,ATP6V1G2,CSRP1,DYNC1H1,DYNC1I1,GSTP1,PSMC1,PSMD10,RPL9,RPS27A,SOD1,UBA52,UBB,UBC,H4C1,PRDX6,TUBB6,TUBA1C
4_Member	Reactome Gene Sets	R-HSA-9020702	Interleukin-1 signaling	-5.73751	-3.73271	8/103	3146,5700,5716,6233,6285,7311,7314,7316	HMGB1,PSMC1,PSMD10,RPS27A,S100B,UBA52,UBB,UBC
4_Member	Reactome Gene Sets	R-HSA-9013973	TICAM1-dependent activation of IRF3/IRF7	-5.72697	-3.726	4/12	6233,7311,7314,7316	RPS27A,UBA52,UBB,UBC
4_Member	GO Biological Processes	GO:0033674	positive regulation of kinase activity	-5.69345	-3.70561	18/604	801,805,808,2185,3146,4137,5208,5478,5716,6233,6647,6714,7311,7314,7316,8826,9693,219771	CALM1,CALM2,CALM3,PTK2B,HMGB1,MAPT,PFKFB2,PPIA,PSMD10,RPS27A,SOD1,SRC,UBA52,UBB,UBC,IQGAP1,RAPGEF2,CCNY
4_Member	Reactome Gene Sets	R-HSA-9635486	Infection with Mycobacterium tuberculosis	-5.65978	-3.67928	5/27	2023,6233,7311,7314,7316	ENO1,RPS27A,UBA52,UBB,UBC
4_Member	Reactome Gene Sets	R-HSA-8856825	Cargo recognition for clathrin-mediated endocytosis	-5.64316	-3.66628	8/106	1211,1212,6233,7311,7314,7316,29978,84251	CLTA,CLTB,RPS27A,UBA52,UBB,UBC,UBQLN2,SGIP1
4_Member	GO Biological Processes	GO:1905114	cell surface receptor signaling pathway involved in cell-cell signaling	-5.59382	-3.61873	18/614	801,2185,4035,5700,5716,5879,6233,6714,6804,7311,7314,7316,7442,23499,80349,112755,219287,219771	CALM1,PTK2B,LRP1,PSMC1,PSMD10,RAC1,RPS27A,SRC,STX1A,UBA52,UBB,UBC,TRPV1,MACF1,WDR61,STX1B,AMER2,CCNY
4_Member	Reactome Gene Sets	R-HSA-983712	Ion channel transport	-5.58197	-3.60867	10/185	534,801,805,808,6233,7311,7314,7316,7442,53826	ATP6V1G2,CALM1,CALM2,CALM3,RPS27A,UBA52,UBB,UBC,TRPV1,FXYD6
4_Member	Reactome Gene Sets	R-HSA-1358803	Downregulation of ERBB2:ERBB3 signaling	-5.57	-3.60813	4/13	6233,7311,7314,7316	RPS27A,UBA52,UBB,UBC
4_Member	Reactome Gene Sets	R-HSA-209543	p75NTR recruits signalling complexes	-5.57	-3.60813	4/13	6233,7311,7314,7316	RPS27A,UBA52,UBB,UBC
4_Member	Reactome Gene Sets	R-HSA-209560	NF-kB is activated and signals survival	-5.57	-3.60813	4/13	6233,7311,7314,7316	RPS27A,UBA52,UBB,UBC
4_Member	Reactome Gene Sets	R-HSA-9637687	Suppression of phagosomal maturation	-5.57	-3.60813	4/13	6233,7311,7314,7316	RPS27A,UBA52,UBB,UBC
4_Member	GO Biological Processes	GO:0051347	positive regulation of transferase activity	-5.55369	-3.59619	19/682	801,805,808,2185,3146,4137,4345,5208,5478,5716,6233,6647,6714,7311,7314,7316,8826,9693,219771	CALM1,CALM2,CALM3,PTK2B,HMGB1,MAPT,CD200,PFKFB2,PPIA,PSMD10,RPS27A,SOD1,SRC,UBA52,UBB,UBC,IQGAP1,RAPGEF2,CCNY
4_Member	Reactome Gene Sets	R-HSA-2672351	Stimuli-sensing channels	-5.5518	-3.59602	8/109	801,805,808,6233,7311,7314,7316,7442	CALM1,CALM2,CALM3,RPS27A,UBA52,UBB,UBC,TRPV1
4_Member	Reactome Gene Sets	R-HSA-177929	Signaling by EGFR	-5.53767	-3.5853	6/50	102,6233,6714,7311,7314,7316	ADAM10,RPS27A,SRC,UBA52,UBB,UBC
4_Member	Reactome Gene Sets	R-HSA-211733	Regulation of activated PAK-2p34 by proteasome mediated degradation	-5.53767	-3.5853	6/50	5700,5716,6233,7311,7314,7316	PSMC1,PSMD10,RPS27A,UBA52,UBB,UBC
4_Member	Reactome Gene Sets	R-HSA-168928	DDX58/IFIH1-mediated induction of interferon-alpha/beta	-5.50717	-3.55988	7/78	3146,6233,6285,7311,7314,7316,57506	HMGB1,RPS27A,S100B,UBA52,UBB,UBC,MAVS
4_Member	Reactome Gene Sets	R-HSA-162588	Budding and maturation of HIV virion	-5.49783	-3.55556	5/29	5478,6233,7311,7314,7316	PPIA,RPS27A,UBA52,UBB,UBC
4_Member	Reactome Gene Sets	R-HSA-5205647	Mitophagy	-5.49783	-3.55556	5/29	6233,6714,7311,7314,7316	RPS27A,SRC,UBA52,UBB,UBC
4_Member	Reactome Gene Sets	R-HSA-5654732	Negative regulation of FGFR3 signaling	-5.49783	-3.55556	5/29	6233,6714,7311,7314,7316	RPS27A,SRC,UBA52,UBB,UBC
4_Member	Reactome Gene Sets	R-HSA-6806834	Signaling by MET	-5.46981	-3.52921	7/79	1278,5879,6233,6714,7311,7314,7316	COL1A2,RAC1,RPS27A,SRC,UBA52,UBB,UBC
4_Member	Reactome Gene Sets	R-HSA-157118	Signaling by NOTCH	-5.45868	-3.52138	11/236	102,2173,4904,5700,5716,6233,7311,7314,7316,8359,26960	ADAM10,FABP7,YBX1,PSMC1,PSMD10,RPS27A,UBA52,UBB,UBC,H4C1,NBEA
4_Member	Reactome Gene Sets	R-HSA-68882	Mitotic Anaphase	-5.45868	-3.52138	11/236	1778,1780,5700,5716,6233,7311,7314,7316,22919,84617,84790	DYNC1H1,DYNC1I1,PSMC1,PSMD10,RPS27A,UBA52,UBB,UBC,MAPRE1,TUBB6,TUBA1C
4_Member	Reactome Gene Sets	R-HSA-9006934	Signaling by Receptor Tyrosine Kinases	-5.453	-3.51734	16/505	102,534,801,805,808,1211,1278,2185,2670,5879,6233,6285,6714,7311,7314,7316	ADAM10,ATP6V1G2,CALM1,CALM2,CALM3,CLTA,COL1A2,PTK2B,GFAP,RAC1,RPS27A,S100B,SRC,UBA52,UBB,UBC
4_Member	Reactome Gene Sets	R-HSA-2555396	Mitotic Metaphase and Anaphase	-5.44107	-3.51183	11/237	1778,1780,5700,5716,6233,7311,7314,7316,22919,84617,84790	DYNC1H1,DYNC1I1,PSMC1,PSMD10,RPS27A,UBA52,UBB,UBC,MAPRE1,TUBB6,TUBA1C
4_Member	Reactome Gene Sets	R-HSA-180534	Vpu mediated degradation of CD4	-5.43585	-3.51183	6/52	5700,5716,6233,7311,7314,7316	PSMC1,PSMD10,RPS27A,UBA52,UBB,UBC
4_Member	Reactome Gene Sets	R-HSA-349425	Autodegradation of the E3 ubiquitin ligase COP1	-5.43585	-3.51183	6/52	5700,5716,6233,7311,7314,7316	PSMC1,PSMD10,RPS27A,UBA52,UBB,UBC
4_Member	Reactome Gene Sets	R-HSA-69601	Ubiquitin Mediated Degradation of Phosphorylated Cdc25A	-5.43585	-3.51183	6/52	5700,5716,6233,7311,7314,7316	PSMC1,PSMD10,RPS27A,UBA52,UBB,UBC
4_Member	Reactome Gene Sets	R-HSA-69610	p53-Independent DNA Damage Response	-5.43585	-3.51183	6/52	5700,5716,6233,7311,7314,7316	PSMC1,PSMD10,RPS27A,UBA52,UBB,UBC
4_Member	Reactome Gene Sets	R-HSA-69613	p53-Independent G1/S DNA damage checkpoint	-5.43585	-3.51183	6/52	5700,5716,6233,7311,7314,7316	PSMC1,PSMD10,RPS27A,UBA52,UBB,UBC
4_Member	Reactome Gene Sets	R-HSA-75815	Ubiquitin-dependent degradation of Cyclin D	-5.43585	-3.51183	6/52	5700,5716,6233,7311,7314,7316	PSMC1,PSMD10,RPS27A,UBA52,UBB,UBC
4_Member	Reactome Gene Sets	R-HSA-5610787	Hedgehog 'off' state	-5.43433	-3.51183	8/113	5700,5716,6233,7311,7314,7316,84617,84790	PSMC1,PSMD10,RPS27A,UBA52,UBB,UBC,TUBB6,TUBA1C
4_Member	Reactome Gene Sets	R-HSA-174490	Membrane binding and targetting of GAG proteins	-5.4266	-3.51172	4/14	6233,7311,7314,7316	RPS27A,UBA52,UBB,UBC
4_Member	Reactome Gene Sets	R-HSA-174495	Synthesis And Processing Of GAG, GAGPOL Polyproteins	-5.4266	-3.51172	4/14	6233,7311,7314,7316	RPS27A,UBA52,UBB,UBC
4_Member	Reactome Gene Sets	R-HSA-975110	TRAF6 mediated IRF7 activation in TLR7/8 or 9 signaling	-5.4266	-3.51172	4/14	6233,7311,7314,7316	RPS27A,UBA52,UBB,UBC
4_Member	Reactome Gene Sets	R-HSA-169911	Regulation of Apoptosis	-5.38657	-3.47482	6/53	5700,5716,6233,7311,7314,7316	PSMC1,PSMD10,RPS27A,UBA52,UBB,UBC
4_Member	Reactome Gene Sets	R-HSA-9013694	Signaling by NOTCH4	-5.36085	-3.45406	7/82	102,5700,5716,6233,7311,7314,7316	ADAM10,PSMC1,PSMD10,RPS27A,UBA52,UBB,UBC
4_Member	Reactome Gene Sets	R-HSA-69275	G2/M Transition	-5.35812	-3.45406	10/196	1778,5700,5716,6233,7311,7314,7316,22919,84617,84790	DYNC1H1,PSMC1,PSMD10,RPS27A,UBA52,UBB,UBC,MAPRE1,TUBB6,TUBA1C
4_Member	Reactome Gene Sets	R-HSA-2122948	Activated NOTCH1 Transmits Signal to the Nucleus	-5.34791	-3.4484	5/31	102,6233,7311,7314,7316	ADAM10,RPS27A,UBA52,UBB,UBC
4_Member	Reactome Gene Sets	R-HSA-5654733	Negative regulation of FGFR4 signaling	-5.34791	-3.4484	5/31	6233,6714,7311,7314,7316	RPS27A,SRC,UBA52,UBB,UBC
4_Member	Reactome Gene Sets	R-HSA-180585	Vif-mediated degradation of APOBEC3G	-5.33831	-3.44329	6/54	5700,5716,6233,7311,7314,7316	PSMC1,PSMD10,RPS27A,UBA52,UBB,UBC
4_Member	Reactome Gene Sets	R-HSA-8854050	FBXL7 down-regulates AURKA during mitotic entry and in early mitosis	-5.33831	-3.44329	6/54	5700,5716,6233,7311,7314,7316	PSMC1,PSMD10,RPS27A,UBA52,UBB,UBC
4_Member	Reactome Gene Sets	R-HSA-9604323	Negative regulation of NOTCH4 signaling	-5.33831	-3.44329	6/54	5700,5716,6233,7311,7314,7316	PSMC1,PSMD10,RPS27A,UBA52,UBB,UBC
4_Member	Reactome Gene Sets	R-HSA-453274	Mitotic G2-G2/M phases	-5.319	-3.42555	10/198	1778,5700,5716,6233,7311,7314,7316,22919,84617,84790	DYNC1H1,PSMC1,PSMD10,RPS27A,UBA52,UBB,UBC,MAPRE1,TUBB6,TUBA1C
4_Member	Reactome Gene Sets	R-HSA-3134975	Regulation of innate immune responses to cytosolic DNA	-5.29464	-3.41464	4/15	6233,7311,7314,7316	RPS27A,UBA52,UBB,UBC
4_Member	Reactome Gene Sets	R-HSA-8875360	InlB-mediated entry of Listeria monocytogenes into host cell	-5.29464	-3.41464	4/15	6233,7311,7314,7316	RPS27A,UBA52,UBB,UBC
4_Member	Reactome Gene Sets	R-HSA-937039	IRAK1 recruits IKK complex	-5.29464	-3.41464	4/15	6233,7311,7314,7316	RPS27A,UBA52,UBB,UBC
4_Member	Reactome Gene Sets	R-HSA-9706369	Negative regulation of FLT3	-5.29464	-3.41464	4/15	6233,7311,7314,7316	RPS27A,UBA52,UBB,UBC
4_Member	Reactome Gene Sets	R-HSA-975144	IRAK1 recruits IKK complex upon TLR7/8 or 9 stimulation	-5.29464	-3.41464	4/15	6233,7311,7314,7316	RPS27A,UBA52,UBB,UBC
4_Member	Reactome Gene Sets	R-HSA-174113	SCF-beta-TrCP mediated degradation of Emi1	-5.29103	-3.41464	6/55	5700,5716,6233,7311,7314,7316	PSMC1,PSMD10,RPS27A,UBA52,UBB,UBC
4_Member	Reactome Gene Sets	R-HSA-4641257	Degradation of AXIN	-5.29103	-3.41464	6/55	5700,5716,6233,7311,7314,7316	PSMC1,PSMD10,RPS27A,UBA52,UBB,UBC
4_Member	Reactome Gene Sets	R-HSA-2262752	Cellular responses to stress	-5.27137	-3.39961	17/584	318,534,1778,1780,2950,5700,5716,6133,6233,6647,7311,7314,7316,8359,9588,84617,84790	NUDT2,ATP6V1G2,DYNC1H1,DYNC1I1,GSTP1,PSMC1,PSMD10,RPL9,RPS27A,SOD1,UBA52,UBB,UBC,H4C1,PRDX6,TUBB6,TUBA1C
4_Member	Reactome Gene Sets	R-HSA-450408	AUF1 (hnRNP D0) binds and destabilizes mRNA	-5.24471	-3.37856	6/56	5700,5716,6233,7311,7314,7316	PSMC1,PSMD10,RPS27A,UBA52,UBB,UBC
4_Member	Reactome Gene Sets	R-HSA-5362768	Hh mutants are degraded by ERAD	-5.24471	-3.37856	6/56	5700,5716,6233,7311,7314,7316	PSMC1,PSMD10,RPS27A,UBA52,UBB,UBC
4_Member	Reactome Gene Sets	R-HSA-1980145	Signaling by NOTCH2	-5.20843	-3.35058	5/33	102,6233,7311,7314,7316	ADAM10,RPS27A,UBA52,UBB,UBC
4_Member	Reactome Gene Sets	R-HSA-5654726	Negative regulation of FGFR1 signaling	-5.20843	-3.35058	5/33	6233,6714,7311,7314,7316	RPS27A,SRC,UBA52,UBB,UBC
4_Member	Reactome Gene Sets	R-HSA-4641258	Degradation of DVL	-5.19929	-3.34418	6/57	5700,5716,6233,7311,7314,7316	PSMC1,PSMD10,RPS27A,UBA52,UBB,UBC
4_Member	Reactome Gene Sets	R-HSA-69541	Stabilization of p53	-5.19929	-3.34418	6/57	5700,5716,6233,7311,7314,7316	PSMC1,PSMD10,RPS27A,UBA52,UBB,UBC
4_Member	GO Biological Processes	GO:0045860	positive regulation of protein kinase activity	-5.17839	-3.33204	16/531	801,805,808,2185,3146,5478,5716,6233,6647,6714,7311,7314,7316,8826,9693,219771	CALM1,CALM2,CALM3,PTK2B,HMGB1,PPIA,PSMD10,RPS27A,SOD1,SRC,UBA52,UBB,UBC,IQGAP1,RAPGEF2,CCNY
4_Member	Reactome Gene Sets	R-HSA-110312	Translesion synthesis by REV1	-5.17243	-3.33204	4/16	6233,7311,7314,7316	RPS27A,UBA52,UBB,UBC
4_Member	Reactome Gene Sets	R-HSA-193639	p75NTR signals via NF-kB	-5.17243	-3.33204	4/16	6233,7311,7314,7316	RPS27A,UBA52,UBB,UBC
4_Member	Reactome Gene Sets	R-HSA-205043	NRIF signals cell death from the nucleus	-5.17243	-3.33204	4/16	6233,7311,7314,7316	RPS27A,UBA52,UBB,UBC
4_Member	Reactome Gene Sets	R-HSA-2173791	TGF-beta receptor signaling in EMT (epithelial to mesenchymal transition)	-5.17243	-3.33204	4/16	6233,7311,7314,7316	RPS27A,UBA52,UBB,UBC
4_Member	Reactome Gene Sets	R-HSA-3229121	Glycogen storage diseases	-5.17243	-3.33204	4/16	6233,7311,7314,7316	RPS27A,UBA52,UBB,UBC
4_Member	Reactome Gene Sets	R-HSA-3322077	Glycogen synthesis	-5.17243	-3.33204	4/16	6233,7311,7314,7316	RPS27A,UBA52,UBB,UBC
4_Member	Reactome Gene Sets	R-HSA-5684264	MAP3K8 (TPL2)-dependent MAPK1/3 activation	-5.17243	-3.33204	4/16	6233,7311,7314,7316	RPS27A,UBA52,UBB,UBC
4_Member	Reactome Gene Sets	R-HSA-975163	IRAK2 mediated activation of TAK1 complex upon TLR7/8 or 9 stimulation	-5.17243	-3.33204	4/16	6233,7311,7314,7316	RPS27A,UBA52,UBB,UBC
4_Member	Reactome Gene Sets	R-HSA-5654727	Negative regulation of FGFR2 signaling	-5.14217	-3.30702	5/34	6233,6714,7311,7314,7316	RPS27A,SRC,UBA52,UBB,UBC
4_Member	Reactome Gene Sets	R-HSA-936440	Negative regulators of DDX58/IFIH1 signaling	-5.14217	-3.30702	5/34	6233,7311,7314,7316,57506	RPS27A,UBA52,UBB,UBC,MAVS
4_Member	Reactome Gene Sets	R-HSA-5687128	MAPK6/MAPK4 signaling	-5.12315	-3.28929	7/89	5700,5716,5879,6233,7311,7314,7316	PSMC1,PSMD10,RAC1,RPS27A,UBA52,UBB,UBC
4_Member	Reactome Gene Sets	R-HSA-5387390	Hh mutants abrogate ligand secretion	-5.11107	-3.28365	6/59	5700,5716,6233,7311,7314,7316	PSMC1,PSMD10,RPS27A,UBA52,UBB,UBC
4_Member	Reactome Gene Sets	R-HSA-5676590	NIK-->noncanonical NF-kB signaling	-5.11107	-3.28365	6/59	5700,5716,6233,7311,7314,7316	PSMC1,PSMD10,RPS27A,UBA52,UBB,UBC
4_Member	Reactome Gene Sets	R-HSA-68827	CDT1 association with the CDC6:ORC:origin complex	-5.11107	-3.28365	6/59	5700,5716,6233,7311,7314,7316	PSMC1,PSMD10,RPS27A,UBA52,UBB,UBC
4_Member	Reactome Gene Sets	R-HSA-8866654	E3 ubiquitin ligases ubiquitinate target proteins	-5.11107	-3.28365	6/59	5591,6233,7311,7314,7316,80349	PRKDC,RPS27A,UBA52,UBB,UBC,WDR61
4_Member	Reactome Gene Sets	R-HSA-532668	N-glycan trimming in the ER and Calnexin/Calreticulin cycle	-5.07805	-3.25822	5/35	5700,6233,7311,7314,7316	PSMC1,RPS27A,UBA52,UBB,UBC
4_Member	Reactome Gene Sets	R-HSA-9615710	Late endosomal microautophagy	-5.07805	-3.25822	5/35	6233,7311,7314,7316,10226	RPS27A,UBA52,UBB,UBC,PLIN3
4_Member	Reactome Gene Sets	R-HSA-187577	SCF(Skp2)-mediated degradation of p27/p21	-5.06821	-3.25708	6/60	5700,5716,6233,7311,7314,7316	PSMC1,PSMD10,RPS27A,UBA52,UBB,UBC
4_Member	Reactome Gene Sets	R-HSA-5607761	Dectin-1 mediated noncanonical NF-kB signaling	-5.06821	-3.25708	6/60	5700,5716,6233,7311,7314,7316	PSMC1,PSMD10,RPS27A,UBA52,UBB,UBC
4_Member	Reactome Gene Sets	R-HSA-5610780	Degradation of GLI1 by the proteasome	-5.06821	-3.25708	6/60	5700,5716,6233,7311,7314,7316	PSMC1,PSMD10,RPS27A,UBA52,UBB,UBC
4_Member	Reactome Gene Sets	R-HSA-5610783	Degradation of GLI2 by the proteasome	-5.06821	-3.25708	6/60	5700,5716,6233,7311,7314,7316	PSMC1,PSMD10,RPS27A,UBA52,UBB,UBC
4_Member	Reactome Gene Sets	R-HSA-5610785	GLI3 is processed to GLI3R by the proteasome	-5.06821	-3.25708	6/60	5700,5716,6233,7311,7314,7316	PSMC1,PSMD10,RPS27A,UBA52,UBB,UBC
4_Member	Reactome Gene Sets	R-HSA-5655862	Translesion synthesis by POLK	-5.05865	-3.25242	4/17	6233,7311,7314,7316	RPS27A,UBA52,UBB,UBC
4_Member	Reactome Gene Sets	R-HSA-5656121	Translesion synthesis by POLI	-5.05865	-3.25242	4/17	6233,7311,7314,7316	RPS27A,UBA52,UBB,UBC
4_Member	Reactome Gene Sets	R-HSA-937072	TRAF6-mediated induction of TAK1 complex within TLR4 complex	-5.05865	-3.25242	4/17	6233,7311,7314,7316	RPS27A,UBA52,UBB,UBC
4_Member	Reactome Gene Sets	R-HSA-5678895	Defective CFTR causes cystic fibrosis	-5.02613	-3.22353	6/61	5700,5716,6233,7311,7314,7316	PSMC1,PSMD10,RPS27A,UBA52,UBB,UBC
4_Member	Reactome Gene Sets	R-HSA-936964	Activation of IRF3/IRF7 mediated by TBK1/IKK epsilon	-4.95224	-3.16388	4/18	6233,7311,7314,7316	RPS27A,UBA52,UBB,UBC
4_Member	Reactome Gene Sets	R-HSA-8878159	Transcriptional regulation by RUNX3	-4.93563	-3.15191	7/95	5700,5716,6233,6714,7311,7314,7316	PSMC1,PSMD10,RPS27A,SRC,UBA52,UBB,UBC
4_Member	Reactome Gene Sets	R-HSA-174084	Autodegradation of Cdh1 by Cdh1:APC/C	-4.90438	-3.12525	6/64	5700,5716,6233,7311,7314,7316	PSMC1,PSMD10,RPS27A,UBA52,UBB,UBC
4_Member	Reactome Gene Sets	R-HSA-4608870	Asymmetric localization of PCP proteins	-4.90438	-3.12525	6/64	5700,5716,6233,7311,7314,7316	PSMC1,PSMD10,RPS27A,UBA52,UBB,UBC
4_Member	Reactome Gene Sets	R-HSA-5689896	Ovarian tumor domain proteases	-4.89727	-3.12052	5/38	6233,7311,7314,7316,57506	RPS27A,UBA52,UBB,UBC,MAVS
4_Member	Reactome Gene Sets	R-HSA-5696394	DNA Damage Recognition in GG-NER	-4.89727	-3.12052	5/38	5886,6233,7311,7314,7316	RAD23A,RPS27A,UBA52,UBB,UBC
4_Member	Reactome Gene Sets	R-HSA-5358346	Hedgehog ligand biogenesis	-4.8652	-3.09176	6/65	5700,5716,6233,7311,7314,7316	PSMC1,PSMD10,RPS27A,UBA52,UBB,UBC
4_Member	Reactome Gene Sets	R-HSA-110320	Translesion Synthesis by POLH	-4.85231	-3.08335	4/19	6233,7311,7314,7316	RPS27A,UBA52,UBB,UBC
4_Member	Reactome Gene Sets	R-HSA-1236382	Constitutive Signaling by Ligand-Responsive EGFR Cancer Variants	-4.85231	-3.08335	4/19	6233,7311,7314,7316	RPS27A,UBA52,UBB,UBC
4_Member	Reactome Gene Sets	R-HSA-5637815	Signaling by Ligand-Responsive EGFR Variants in Cancer	-4.85231	-3.08335	4/19	6233,7311,7314,7316	RPS27A,UBA52,UBB,UBC
4_Member	Reactome Gene Sets	R-HSA-6804760	Regulation of TP53 Activity through Methylation	-4.85231	-3.08335	4/19	6233,7311,7314,7316	RPS27A,UBA52,UBB,UBC
4_Member	Reactome Gene Sets	R-HSA-1234176	Oxygen-dependent proline hydroxylation of Hypoxia-inducible Factor Alpha	-4.8267	-3.06439	6/66	5700,5716,6233,7311,7314,7316	PSMC1,PSMD10,RPS27A,UBA52,UBB,UBC
4_Member	Reactome Gene Sets	R-HSA-69563	p53-Dependent G1 DNA Damage Response	-4.8267	-3.06439	6/66	5700,5716,6233,7311,7314,7316	PSMC1,PSMD10,RPS27A,UBA52,UBB,UBC
4_Member	Reactome Gene Sets	R-HSA-69580	p53-Dependent G1/S DNA damage checkpoint	-4.8267	-3.06439	6/66	5700,5716,6233,7311,7314,7316	PSMC1,PSMD10,RPS27A,UBA52,UBB,UBC
4_Member	Reactome Gene Sets	R-HSA-1169091	Activation of NF-kappaB in B cells	-4.78884	-3.02873	6/67	5700,5716,6233,7311,7314,7316	PSMC1,PSMD10,RPS27A,UBA52,UBB,UBC
4_Member	Reactome Gene Sets	R-HSA-5654741	Signaling by FGFR3	-4.78534	-3.02741	5/40	6233,6714,7311,7314,7316	RPS27A,SRC,UBA52,UBB,UBC
4_Member	Reactome Gene Sets	R-HSA-168927	TICAM1, RIP1-mediated IKK complex recruitment	-4.75812	-3.00345	4/20	6233,7311,7314,7316	RPS27A,UBA52,UBB,UBC
4_Member	Reactome Gene Sets	R-HSA-174154	APC/C:Cdc20 mediated degradation of Securin	-4.75161	-3.00337	6/68	5700,5716,6233,7311,7314,7316	PSMC1,PSMD10,RPS27A,UBA52,UBB,UBC
4_Member	Reactome Gene Sets	R-HSA-5658442	Regulation of RAS by GAPs	-4.75161	-3.00337	6/68	5700,5716,6233,7311,7314,7316	PSMC1,PSMD10,RPS27A,UBA52,UBB,UBC
4_Member	Reactome Gene Sets	R-HSA-68867	Assembly of the pre-replicative complex	-4.75161	-3.00337	6/68	5700,5716,6233,7311,7314,7316	PSMC1,PSMD10,RPS27A,UBA52,UBB,UBC
4_Member	Reactome Gene Sets	R-HSA-69615	G1/S DNA Damage Checkpoints	-4.75161	-3.00337	6/68	5700,5716,6233,7311,7314,7316	PSMC1,PSMD10,RPS27A,UBA52,UBB,UBC
4_Member	Reactome Gene Sets	R-HSA-446652	Interleukin-1 family signaling	-4.74842	-3.0023	8/140	3146,5700,5716,6233,6285,7311,7314,7316	HMGB1,PSMC1,PSMD10,RPS27A,S100B,UBA52,UBB,UBC
4_Member	Reactome Gene Sets	R-HSA-5689603	UCH proteinases	-4.73313	-2.99083	7/102	5700,5716,6233,7311,7314,7316,7347	PSMC1,PSMD10,RPS27A,UBA52,UBB,UBC,UCHL3
4_Member	GO Biological Processes	GO:0019068	virion assembly	-4.73168	-2.99083	5/41	5478,6233,7311,7314,7316	PPIA,RPS27A,UBA52,UBB,UBC
4_Member	Reactome Gene Sets	R-HSA-5654743	Signaling by FGFR4	-4.73168	-2.99083	5/41	6233,6714,7311,7314,7316	RPS27A,SRC,UBA52,UBB,UBC
4_Member	Reactome Gene Sets	R-HSA-8948751	Regulation of PTEN stability and activity	-4.71499	-2.9783	6/69	5700,5716,6233,7311,7314,7316	PSMC1,PSMD10,RPS27A,UBA52,UBB,UBC
4_Member	GO Biological Processes	GO:0002218	activation of innate immune response	-4.69062	-2.95805	12/339	3146,5591,5700,5716,6233,6271,6714,7311,7314,7316,8546,57506	HMGB1,PRKDC,PSMC1,PSMD10,RPS27A,S100A1,SRC,UBA52,UBB,UBC,AP3B1,MAVS
4_Member	Reactome Gene Sets	R-HSA-162906	HIV Infection	-4.68615	-2.95563	10/234	291,293,5478,5700,5716,5879,6233,7311,7314,7316	SLC25A4,SLC25A6,PPIA,PSMC1,PSMD10,RAC1,RPS27A,UBA52,UBB,UBC
4_Member	GO Biological Processes	GO:0042276	error-prone translesion synthesis	-4.66908	-2.94966	4/21	6233,7311,7314,7316	RPS27A,UBA52,UBB,UBC
4_Member	Reactome Gene Sets	R-HSA-4641263	Regulation of FZD by ubiquitination	-4.66908	-2.94966	4/21	6233,7311,7314,7316	RPS27A,UBA52,UBB,UBC
4_Member	Reactome Gene Sets	R-HSA-6807004	Negative regulation of MET activity	-4.66908	-2.94966	4/21	6233,7311,7314,7316	RPS27A,UBA52,UBB,UBC
4_Member	Reactome Gene Sets	R-HSA-901032	ER Quality Control Compartment (ERQC)	-4.66908	-2.94966	4/21	6233,7311,7314,7316	RPS27A,UBA52,UBB,UBC
4_Member	GO Biological Processes	GO:0043488	regulation of mRNA stability	-4.65705	-2.94054	9/188	2521,4904,5700,5716,6233,7311,7314,7316,201626	FUS,YBX1,PSMC1,PSMD10,RPS27A,UBA52,UBB,UBC,PDE12
4_Member	GO Biological Processes	GO:0045089	positive regulation of innate immune response	-4.65699	-2.94054	13/399	3146,5591,5700,5716,6233,6271,6714,7311,7314,7316,8546,23705,57506	HMGB1,PRKDC,PSMC1,PSMD10,RPS27A,S100A1,SRC,UBA52,UBB,UBC,AP3B1,CADM1,MAVS
4_Member	Reactome Gene Sets	R-HSA-68949	Orc1 removal from chromatin	-4.6435	-2.92904	6/71	5700,5716,6233,7311,7314,7316	PSMC1,PSMD10,RPS27A,UBA52,UBB,UBC
4_Member	Reactome Gene Sets	R-HSA-449147	Signaling by Interleukins	-4.635	-2.92249	14/461	1278,2185,3146,5478,5700,5716,6233,6285,6616,6647,6804,7311,7314,7316	COL1A2,PTK2B,HMGB1,PPIA,PSMC1,PSMD10,RPS27A,S100B,SNAP25,SOD1,STX1A,UBA52,UBB,UBC
4_Member	Reactome Gene Sets	R-HSA-5696395	Formation of Incision Complex in GG-NER	-4.6286	-2.91864	5/43	5886,6233,7311,7314,7316	RAD23A,RPS27A,UBA52,UBB,UBC
4_Member	Reactome Gene Sets	R-HSA-8856828	Clathrin-mediated endocytosis	-4.61671	-2.90908	8/146	1211,1212,6233,7311,7314,7316,29978,84251	CLTA,CLTB,RPS27A,UBA52,UBB,UBC,UBQLN2,SGIP1
4_Member	Reactome Gene Sets	R-HSA-382551	Transport of small molecules	-4.59369	-2.88992	18/728	291,293,358,534,801,805,808,1211,2039,5700,5716,6233,6520,7311,7314,7316,7442,53826	SLC25A4,SLC25A6,AQP1,ATP6V1G2,CALM1,CALM2,CALM3,CLTA,DMTN,PSMC1,PSMD10,RPS27A,SLC3A2,UBA52,UBB,UBC,TRPV1,FXYD6
4_Member	GO Biological Processes	GO:0000717	nucleotide-excision repair, DNA duplex unwinding	-4.58466	-2.88757	4/22	6233,7311,7314,7316	RPS27A,UBA52,UBB,UBC
4_Member	GO Biological Processes	GO:0070987	error-free translesion synthesis	-4.58466	-2.88757	4/22	6233,7311,7314,7316	RPS27A,UBA52,UBB,UBC
4_Member	Reactome Gene Sets	R-HSA-5205685	PINK1-PRKN Mediated Mitophagy	-4.58466	-2.88757	4/22	6233,7311,7314,7316	RPS27A,UBA52,UBB,UBC
4_Member	Reactome Gene Sets	R-HSA-912631	Regulation of signaling by CBL	-4.58466	-2.88757	4/22	6233,7311,7314,7316	RPS27A,UBA52,UBB,UBC
4_Member	GO Biological Processes	GO:0001666	response to hypoxia	-4.5791	-2.88461	12/348	210,358,2023,2185,5066,5700,5716,6233,6714,7311,7314,7316	ALAD,AQP1,ENO1,PTK2B,PAM,PSMC1,PSMD10,RPS27A,SRC,UBA52,UBB,UBC
4_Member	Reactome Gene Sets	R-HSA-2173793	Transcriptional activity of SMAD2/SMAD3:SMAD4 heterotrimer	-4.57903	-2.88461	5/44	6233,7311,7314,7316,8239	RPS27A,UBA52,UBB,UBC,USP9X
4_Member	Reactome Gene Sets	R-HSA-174184	Cdc20:Phospho-APC/C mediated degradation of Cyclin A	-4.57424	-2.88461	6/73	5700,5716,6233,7311,7314,7316	PSMC1,PSMD10,RPS27A,UBA52,UBB,UBC
4_Member	Reactome Gene Sets	R-HSA-69017	CDK-mediated phosphorylation and removal of Cdc6	-4.57424	-2.88461	6/73	5700,5716,6233,7311,7314,7316	PSMC1,PSMD10,RPS27A,UBA52,UBB,UBC
4_Member	Reactome Gene Sets	R-HSA-8939902	Regulation of RUNX2 expression and activity	-4.57424	-2.88461	6/73	5700,5716,6233,7311,7314,7316	PSMC1,PSMD10,RPS27A,UBA52,UBB,UBC
4_Member	Reactome Gene Sets	R-HSA-5358351	Signaling by Hedgehog	-4.55319	-2.86639	8/149	5700,5716,6233,7311,7314,7316,84617,84790	PSMC1,PSMD10,RPS27A,UBA52,UBB,UBC,TUBB6,TUBA1C
4_Member	Reactome Gene Sets	R-HSA-174178	APC/C:Cdh1 mediated degradation of Cdc20 and other APC/C:Cdh1 targeted proteins in late mitosis/early G1	-4.5404	-2.85727	6/74	5700,5716,6233,7311,7314,7316	PSMC1,PSMD10,RPS27A,UBA52,UBB,UBC
4_Member	Reactome Gene Sets	R-HSA-179419	APC:Cdc20 mediated degradation of cell cycle proteins prior to satisfation of the cell cycle checkpoint	-4.5404	-2.85727	6/74	5700,5716,6233,7311,7314,7316	PSMC1,PSMD10,RPS27A,UBA52,UBB,UBC
4_Member	Reactome Gene Sets	R-HSA-1980143	Signaling by NOTCH1	-4.5404	-2.85727	6/74	102,6233,7311,7314,7316,26960	ADAM10,RPS27A,UBA52,UBB,UBC,NBEA
4_Member	GO Biological Processes	GO:0031349	positive regulation of defense response	-4.5348	-2.85259	15/534	1652,3146,5138,5591,5700,5716,6233,6271,6714,7311,7314,7316,8546,23705,57506	DDT,HMGB1,PDE2A,PRKDC,PSMC1,PSMD10,RPS27A,S100A1,SRC,UBA52,UBB,UBC,AP3B1,CADM1,MAVS
4_Member	Reactome Gene Sets	R-HSA-5688426	Deubiquitination	-4.52336	-2.84297	11/297	5700,5716,5886,6233,7311,7314,7316,7347,8239,27430,57506	PSMC1,PSMD10,RAD23A,RPS27A,UBA52,UBB,UBC,UCHL3,USP9X,MAT2B,MAVS
4_Member	Reactome Gene Sets	R-HSA-977225	Amyloid fiber formation	-4.52025	-2.84077	7/110	102,6233,7311,7314,7316,8239,8359	ADAM10,RPS27A,UBA52,UBB,UBC,USP9X,H4C1
4_Member	Reactome Gene Sets	R-HSA-1234174	Cellular response to hypoxia	-4.50707	-2.83214	6/75	5700,5716,6233,7311,7314,7316	PSMC1,PSMD10,RPS27A,UBA52,UBB,UBC
4_Member	GO Biological Processes	GO:0000715	nucleotide-excision repair, DNA damage recognition	-4.50441	-2.83214	4/23	6233,7311,7314,7316	RPS27A,UBA52,UBB,UBC
4_Member	Reactome Gene Sets	R-HSA-450321	JNK (c-Jun kinases) phosphorylation and activation mediated by activated human TAK1	-4.50441	-2.83214	4/23	6233,7311,7314,7316	RPS27A,UBA52,UBB,UBC
4_Member	GO Biological Processes	GO:0043487	regulation of RNA stability	-4.48002	-2.81131	9/198	2521,4904,5700,5716,6233,7311,7314,7316,201626	FUS,YBX1,PSMC1,PSMD10,RPS27A,UBA52,UBB,UBC,PDE12
4_Member	Reactome Gene Sets	R-HSA-176409	APC/C:Cdc20 mediated degradation of mitotic proteins	-4.47424	-2.80642	6/76	5700,5716,6233,7311,7314,7316	PSMC1,PSMD10,RPS27A,UBA52,UBB,UBC
4_Member	Reactome Gene Sets	R-HSA-68886	M Phase	-4.44812	-2.78644	13/418	1778,1780,5700,5716,6233,7311,7314,7316,8359,22919,26003,84617,84790	DYNC1H1,DYNC1I1,PSMC1,PSMD10,RPS27A,UBA52,UBB,UBC,H4C1,MAPRE1,GORASP2,TUBB6,TUBA1C
4_Member	GO Biological Processes	GO:0061418	regulation of transcription from RNA polymerase II promoter in response to hypoxia	-4.44189	-2.78456	6/77	5700,5716,6233,7311,7314,7316	PSMC1,PSMD10,RPS27A,UBA52,UBB,UBC
4_Member	Reactome Gene Sets	R-HSA-176814	Activation of APC/C and APC/C:Cdc20 mediated degradation of mitotic proteins	-4.44189	-2.78456	6/77	5700,5716,6233,7311,7314,7316	PSMC1,PSMD10,RPS27A,UBA52,UBB,UBC
4_Member	Reactome Gene Sets	R-HSA-5619084	ABC transporter disorders	-4.44189	-2.78456	6/77	5700,5716,6233,7311,7314,7316	PSMC1,PSMD10,RPS27A,UBA52,UBB,UBC
4_Member	Reactome Gene Sets	R-HSA-69231	Cyclin D associated events in G1	-4.43752	-2.78362	5/47	6233,6714,7311,7314,7316	RPS27A,SRC,UBA52,UBB,UBC
4_Member	Reactome Gene Sets	R-HSA-69236	G1 Phase	-4.43752	-2.78362	5/47	6233,6714,7311,7314,7316	RPS27A,SRC,UBA52,UBB,UBC
4_Member	GO Biological Processes	GO:0036293	response to decreased oxygen levels	-4.43596	-2.78292	12/360	210,358,2023,2185,5066,5700,5716,6233,6714,7311,7314,7316	ALAD,AQP1,ENO1,PTK2B,PAM,PSMC1,PSMD10,RPS27A,SRC,UBA52,UBB,UBC
4_Member	GO Biological Processes	GO:0006297	nucleotide-excision repair, DNA gap filling	-4.42796	-2.78254	4/24	6233,7311,7314,7316	RPS27A,UBA52,UBB,UBC
4_Member	Reactome Gene Sets	R-HSA-174048	APC/C:Cdc20 mediated degradation of Cyclin B	-4.42796	-2.78254	4/24	6233,7311,7314,7316	RPS27A,UBA52,UBB,UBC
4_Member	Reactome Gene Sets	R-HSA-450302	activated TAK1 mediates p38 MAPK activation	-4.42796	-2.78254	4/24	6233,7311,7314,7316	RPS27A,UBA52,UBB,UBC
4_Member	Reactome Gene Sets	R-HSA-2122947	NOTCH1 Intracellular Domain Regulates Transcription	-4.39257	-2.74967	5/48	6233,7311,7314,7316,26960	RPS27A,UBA52,UBB,UBC,NBEA
4_Member	Reactome Gene Sets	R-HSA-1643713	Signaling by EGFR in Cancer	-4.35496	-2.71951	4/25	6233,7311,7314,7316	RPS27A,UBA52,UBB,UBC
4_Member	Reactome Gene Sets	R-HSA-5696397	Gap-filling DNA repair synthesis and ligation in GG-NER	-4.35496	-2.71951	4/25	6233,7311,7314,7316	RPS27A,UBA52,UBB,UBC
4_Member	Reactome Gene Sets	R-HSA-937041	IKK complex recruitment mediated by RIP1	-4.35496	-2.71951	4/25	6233,7311,7314,7316	RPS27A,UBA52,UBB,UBC
4_Member	Reactome Gene Sets	R-HSA-1169410	Antiviral mechanism by IFN-stimulated genes	-4.34762	-2.71381	6/80	2317,6233,7311,7314,7316,201626	FLNB,RPS27A,UBA52,UBB,UBC,PDE12
4_Member	GO Biological Processes	GO:0071456	cellular response to hypoxia	-4.34593	-2.71293	9/206	358,2023,5700,5716,6233,6714,7311,7314,7316	AQP1,ENO1,PSMC1,PSMD10,RPS27A,SRC,UBA52,UBB,UBC
4_Member	Reactome Gene Sets	R-HSA-176408	Regulation of APC/C activators between G1/S and early anaphase	-4.31708	-2.68734	6/81	5700,5716,6233,7311,7314,7316	PSMC1,PSMD10,RPS27A,UBA52,UBB,UBC
4_Member	Reactome Gene Sets	R-HSA-1227986	Signaling by ERBB2	-4.30571	-2.6808	5/50	6233,6714,7311,7314,7316	RPS27A,SRC,UBA52,UBB,UBC
4_Member	Reactome Gene Sets	R-HSA-5654736	Signaling by FGFR1	-4.30571	-2.6808	5/50	6233,6714,7311,7314,7316	RPS27A,SRC,UBA52,UBB,UBC
4_Member	Reactome Gene Sets	R-HSA-2871837	FCERI mediated NF-kB activation	-4.28696	-2.66659	6/82	5700,5716,6233,7311,7314,7316	PSMC1,PSMD10,RPS27A,UBA52,UBB,UBC
4_Member	GO Biological Processes	GO:0070911	global genome nucleotide-excision repair	-4.28513	-2.66659	4/26	6233,7311,7314,7316	RPS27A,UBA52,UBB,UBC
4_Member	Reactome Gene Sets	R-HSA-179409	APC-Cdc20 mediated degradation of Nek2A	-4.28513	-2.66659	4/26	6233,7311,7314,7316	RPS27A,UBA52,UBB,UBC
4_Member	Reactome Gene Sets	R-HSA-2173788	Downregulation of TGF-beta receptor signaling	-4.28513	-2.66659	4/26	6233,7311,7314,7316	RPS27A,UBA52,UBB,UBC
4_Member	Reactome Gene Sets	R-HSA-901042	Calnexin/calreticulin cycle	-4.28513	-2.66659	4/26	6233,7311,7314,7316	RPS27A,UBA52,UBB,UBC
4_Member	GO Biological Processes	GO:0061013	regulation of mRNA catabolic process	-4.28121	-2.66346	9/210	2521,4904,5700,5716,6233,7311,7314,7316,201626	FUS,YBX1,PSMC1,PSMD10,RPS27A,UBA52,UBB,UBC,PDE12
4_Member	Reactome Gene Sets	R-HSA-202403	TCR signaling	-4.27783	-2.66086	7/120	5700,5716,6233,7311,7314,7316,55740	PSMC1,PSMD10,RPS27A,UBA52,UBB,UBC,ENAH
4_Member	GO Biological Processes	GO:0031145	anaphase-promoting complex-dependent catabolic process	-4.25726	-2.64802	6/83	5700,5716,6233,7311,7314,7316	PSMC1,PSMD10,RPS27A,UBA52,UBB,UBC
4_Member	Reactome Gene Sets	R-HSA-1236974	ER-Phagosome pathway	-4.25726	-2.64802	6/83	5700,5716,6233,7311,7314,7316	PSMC1,PSMD10,RPS27A,UBA52,UBB,UBC
4_Member	Reactome Gene Sets	R-HSA-195253	Degradation of beta-catenin by the destruction complex	-4.25726	-2.64802	6/83	5700,5716,6233,7311,7314,7316	PSMC1,PSMD10,RPS27A,UBA52,UBB,UBC
4_Member	Reactome Gene Sets	R-HSA-69202	Cyclin E associated events during G1/S transition	-4.25726	-2.64802	6/83	5700,5716,6233,7311,7314,7316	PSMC1,PSMD10,RPS27A,UBA52,UBB,UBC
4_Member	Reactome Gene Sets	R-HSA-8878166	Transcriptional regulation by RUNX2	-4.25488	-2.64725	7/121	5700,5716,6233,6714,7311,7314,7316	PSMC1,PSMD10,RPS27A,SRC,UBA52,UBB,UBC
4_Member	GO Biological Processes	GO:0006402	mRNA catabolic process	-4.23232	-2.62777	12/378	2521,4904,5700,5716,6133,6233,7311,7314,7316,57819,80349,201626	FUS,YBX1,PSMC1,PSMD10,RPL9,RPS27A,UBA52,UBB,UBC,LSM2,WDR61,PDE12
4_Member	GO Biological Processes	GO:0007031	peroxisome organization	-4.22795	-2.62416	6/84	6233,7311,7314,7316,8239,57506	RPS27A,UBA52,UBB,UBC,USP9X,MAVS
4_Member	GO Biological Processes	GO:0036294	cellular response to decreased oxygen levels	-4.21796	-2.61721	9/214	358,2023,5700,5716,6233,6714,7311,7314,7316	AQP1,ENO1,PSMC1,PSMD10,RPS27A,SRC,UBA52,UBB,UBC
4_Member	Reactome Gene Sets	R-HSA-168142	Toll Like Receptor 10 (TLR10) Cascade	-4.19904	-2.60581	6/85	3146,6233,6285,7311,7314,7316	HMGB1,RPS27A,S100B,UBA52,UBB,UBC
4_Member	Reactome Gene Sets	R-HSA-168176	Toll Like Receptor 5 (TLR5) Cascade	-4.19904	-2.60581	6/85	3146,6233,6285,7311,7314,7316	HMGB1,RPS27A,S100B,UBA52,UBB,UBC
4_Member	Reactome Gene Sets	R-HSA-5632684	Hedgehog 'on' state	-4.19904	-2.60581	6/85	5700,5716,6233,7311,7314,7316	PSMC1,PSMD10,RPS27A,UBA52,UBB,UBC
4_Member	Reactome Gene Sets	R-HSA-69002	DNA Replication Pre-Initiation	-4.19904	-2.60581	6/85	5700,5716,6233,7311,7314,7316	PSMC1,PSMD10,RPS27A,UBA52,UBB,UBC
4_Member	Reactome Gene Sets	R-HSA-69656	Cyclin A:Cdk2-associated events at S phase entry	-4.19904	-2.60581	6/85	5700,5716,6233,7311,7314,7316	PSMC1,PSMD10,RPS27A,UBA52,UBB,UBC
4_Member	Reactome Gene Sets	R-HSA-975871	MyD88 cascade initiated on plasma membrane	-4.19904	-2.60581	6/85	3146,6233,6285,7311,7314,7316	HMGB1,RPS27A,S100B,UBA52,UBB,UBC
4_Member	Reactome Gene Sets	R-HSA-8848021	Signaling by PTK6	-4.18241	-2.59066	5/53	5879,6233,7311,7314,7316	RAC1,RPS27A,UBA52,UBB,UBC
4_Member	Reactome Gene Sets	R-HSA-9006927	Signaling by Non-Receptor Tyrosine Kinases	-4.18241	-2.59066	5/53	5879,6233,7311,7314,7316	RAC1,RPS27A,UBA52,UBB,UBC
4_Member	GO Biological Processes	GO:0070482	response to oxygen levels	-4.15648	-2.56695	12/385	210,358,2023,2185,5066,5700,5716,6233,6714,7311,7314,7316	ALAD,AQP1,ENO1,PTK2B,PAM,PSMC1,PSMD10,RPS27A,SRC,UBA52,UBB,UBC
4_Member	Reactome Gene Sets	R-HSA-9682385	FLT3 signaling in disease	-4.154	-2.56595	4/28	6233,7311,7314,7316	RPS27A,UBA52,UBB,UBC
4_Member	Reactome Gene Sets	R-HSA-9683701	Translation of structural proteins	-4.154	-2.56595	4/28	6233,7311,7314,7316	RPS27A,UBA52,UBB,UBC
4_Member	GO Biological Processes	GO:0016055	Wnt signaling pathway	-4.13456	-2.54871	14/513	801,4035,5700,5716,5879,6233,6714,7311,7314,7316,23499,80349,219287,219771	CALM1,LRP1,PSMC1,PSMD10,RAC1,RPS27A,SRC,UBA52,UBB,UBC,MACF1,WDR61,AMER2,CCNY
4_Member	GO Biological Processes	GO:0198738	cell-cell signaling by wnt	-4.11668	-2.53237	14/515	801,4035,5700,5716,5879,6233,6714,7311,7314,7316,23499,80349,219287,219771	CALM1,LRP1,PSMC1,PSMD10,RAC1,RPS27A,SRC,UBA52,UBB,UBC,MACF1,WDR61,AMER2,CCNY
4_Member	Reactome Gene Sets	R-HSA-174143	APC/C-mediated degradation of cell cycle proteins	-4.11458	-2.53237	6/88	5700,5716,6233,7311,7314,7316	PSMC1,PSMD10,RPS27A,UBA52,UBB,UBC
4_Member	Reactome Gene Sets	R-HSA-2565942	Regulation of PLK1 Activity at G2/M Transition	-4.11458	-2.53237	6/88	1778,6233,7311,7314,7316,22919	DYNC1H1,RPS27A,UBA52,UBB,UBC,MAPRE1
4_Member	Reactome Gene Sets	R-HSA-450531	Regulation of mRNA stability by proteins that bind AU-rich elements	-4.11458	-2.53237	6/88	5700,5716,6233,7311,7314,7316	PSMC1,PSMD10,RPS27A,UBA52,UBB,UBC
4_Member	Reactome Gene Sets	R-HSA-453276	Regulation of mitotic cell cycle	-4.11458	-2.53237	6/88	5700,5716,6233,7311,7314,7316	PSMC1,PSMD10,RPS27A,UBA52,UBB,UBC
4_Member	GO Biological Processes	GO:0006294	nucleotide-excision repair, preincision complex assembly	-4.09226	-2.51511	4/29	6233,7311,7314,7316	RPS27A,UBA52,UBB,UBC
4_Member	Reactome Gene Sets	R-HSA-5213460	RIPK1-mediated regulated necrosis	-4.09226	-2.51511	4/29	6233,7311,7314,7316	RPS27A,UBA52,UBB,UBC
4_Member	Reactome Gene Sets	R-HSA-5218859	Regulated Necrosis	-4.09226	-2.51511	4/29	6233,7311,7314,7316	RPS27A,UBA52,UBB,UBC
4_Member	Reactome Gene Sets	R-HSA-5675482	Regulation of necroptotic cell death	-4.09226	-2.51511	4/29	6233,7311,7314,7316	RPS27A,UBA52,UBB,UBC
4_Member	Reactome Gene Sets	R-HSA-8863795	Downregulation of ERBB2 signaling	-4.09226	-2.51511	4/29	6233,7311,7314,7316	RPS27A,UBA52,UBB,UBC
4_Member	Reactome Gene Sets	R-HSA-8939236	RUNX1 regulates transcription of genes involved in differentiation of HSCs	-4.05769	-2.48554	7/130	5700,5716,6233,7311,7314,7316,8359	PSMC1,PSMD10,RPS27A,UBA52,UBB,UBC,H4C1
4_Member	GO Biological Processes	GO:1903311	regulation of mRNA metabolic process	-4.05348	-2.48204	11/335	2521,4904,5700,5716,5936,6233,7311,7314,7316,9588,201626	FUS,YBX1,PSMC1,PSMD10,RBM4,RPS27A,UBA52,UBB,UBC,PRDX6,PDE12
4_Member	GO Biological Processes	GO:0051403	stress-activated MAPK cascade	-4.04358	-2.47496	10/279	2185,2950,3146,5478,6233,7311,7314,7316,7430,140885	PTK2B,GSTP1,HMGB1,PPIA,RPS27A,UBA52,UBB,UBC,EZR,SIRPA
4_Member	Reactome Gene Sets	R-HSA-69052	Switching of origins to a post-replicative state	-4.03332	-2.46842	6/91	5700,5716,6233,7311,7314,7316	PSMC1,PSMD10,RPS27A,UBA52,UBB,UBC
4_Member	Reactome Gene Sets	R-HSA-975138	TRAF6 mediated induction of NFkB and MAP kinases upon TLR7/8 or 9 activation	-4.03332	-2.46842	6/91	3146,6233,6285,7311,7314,7316	HMGB1,RPS27A,S100B,UBA52,UBB,UBC
4_Member	GO Biological Processes	GO:0035666	TRIF-dependent toll-like receptor signaling pathway	-4.03284	-2.46842	4/30	6233,7311,7314,7316	RPS27A,UBA52,UBB,UBC
4_Member	Reactome Gene Sets	R-HSA-110314	Recognition of DNA damage by PCNA-containing replication complex	-4.03284	-2.46842	4/30	6233,7311,7314,7316	RPS27A,UBA52,UBB,UBC
4_Member	Reactome Gene Sets	R-HSA-5357956	TNFR1-induced NFkappaB signaling pathway	-4.03284	-2.46842	4/30	6233,7311,7314,7316	RPS27A,UBA52,UBB,UBC
4_Member	Reactome Gene Sets	R-HSA-975155	MyD88 dependent cascade initiated on endosome	-4.00691	-2.44665	6/92	3146,6233,6285,7311,7314,7316	HMGB1,RPS27A,S100B,UBA52,UBB,UBC
4_Member	Reactome Gene Sets	R-HSA-2644602	Signaling by NOTCH1 PEST Domain Mutants in Cancer	-3.99326	-2.43849	5/58	102,6233,7311,7314,7316	ADAM10,RPS27A,UBA52,UBB,UBC
4_Member	Reactome Gene Sets	R-HSA-2644603	Signaling by NOTCH1 in Cancer	-3.99326	-2.43849	5/58	102,6233,7311,7314,7316	ADAM10,RPS27A,UBA52,UBB,UBC
4_Member	Reactome Gene Sets	R-HSA-2644606	Constitutive Signaling by NOTCH1 PEST Domain Mutants	-3.99326	-2.43849	5/58	102,6233,7311,7314,7316	ADAM10,RPS27A,UBA52,UBB,UBC
4_Member	Reactome Gene Sets	R-HSA-2894858	Signaling by NOTCH1 HD+PEST Domain Mutants in Cancer	-3.99326	-2.43849	5/58	102,6233,7311,7314,7316	ADAM10,RPS27A,UBA52,UBB,UBC
4_Member	Reactome Gene Sets	R-HSA-2894862	Constitutive Signaling by NOTCH1 HD+PEST Domain Mutants	-3.99326	-2.43849	5/58	102,6233,7311,7314,7316	ADAM10,RPS27A,UBA52,UBB,UBC
4_Member	Reactome Gene Sets	R-HSA-917937	Iron uptake and transport	-3.99326	-2.43849	5/58	534,6233,7311,7314,7316	ATP6V1G2,RPS27A,UBA52,UBB,UBC
4_Member	Reactome Gene Sets	R-HSA-168181	Toll Like Receptor 7/8 (TLR7/8) Cascade	-3.98082	-2.42894	6/93	3146,6233,6285,7311,7314,7316	HMGB1,RPS27A,S100B,UBA52,UBB,UBC
4_Member	GO Biological Processes	GO:0043408	regulation of MAPK cascade	-3.97834	-2.42894	17/740	1652,2185,2950,3146,4035,5478,5716,6233,6647,6714,7311,7314,7316,7430,8826,9693,140885	DDT,PTK2B,GSTP1,HMGB1,LRP1,PPIA,PSMD10,RPS27A,SOD1,SRC,UBA52,UBB,UBC,EZR,IQGAP1,RAPGEF2,SIRPA
4_Member	Reactome Gene Sets	R-HSA-182971	EGFR downregulation	-3.97556	-2.42776	4/31	6233,7311,7314,7316	RPS27A,UBA52,UBB,UBC
4_Member	GO Biological Processes	GO:0071453	cellular response to oxygen levels	-3.96435	-2.41836	9/231	358,2023,5700,5716,6233,6714,7311,7314,7316	AQP1,ENO1,PSMC1,PSMD10,RPS27A,SRC,UBA52,UBB,UBC
4_Member	Reactome Gene Sets	R-HSA-168164	Toll Like Receptor 3 (TLR3) Cascade	-3.95505	-2.41223	6/94	3146,6233,6285,7311,7314,7316	HMGB1,RPS27A,S100B,UBA52,UBB,UBC
4_Member	GO Biological Processes	GO:0045088	regulation of innate immune response	-3.93485	-2.39351	13/470	3146,5591,5700,5716,6233,6271,6714,7311,7314,7316,8546,23705,57506	HMGB1,PRKDC,PSMC1,PSMD10,RPS27A,S100A1,SRC,UBA52,UBB,UBC,AP3B1,CADM1,MAVS
4_Member	Reactome Gene Sets	R-HSA-166058	MyD88:MAL(TIRAP) cascade initiated on plasma membrane	-3.9296	-2.39024	6/95	3146,6233,6285,7311,7314,7316	HMGB1,RPS27A,S100B,UBA52,UBB,UBC
4_Member	Reactome Gene Sets	R-HSA-168188	Toll Like Receptor TLR6:TLR2 Cascade	-3.9296	-2.39024	6/95	3146,6233,6285,7311,7314,7316	HMGB1,RPS27A,S100B,UBA52,UBB,UBC
4_Member	GO Biological Processes	GO:0002253	activation of immune response	-3.92251	-2.38746	17/748	3146,5591,5700,5716,5879,6233,6271,6714,7070,7311,7314,7316,7430,8546,10384,29085,57506	HMGB1,PRKDC,PSMC1,PSMD10,RAC1,RPS27A,S100A1,SRC,THY1,UBA52,UBB,UBC,EZR,AP3B1,BTN3A3,PHPT1,MAVS
4_Member	Reactome Gene Sets	R-HSA-2173789	TGF-beta receptor signaling activates SMADs	-3.92029	-2.38746	4/32	6233,7311,7314,7316	RPS27A,UBA52,UBB,UBC
4_Member	Reactome Gene Sets	R-HSA-2173796	SMAD2/SMAD3:SMAD4 heterotrimer regulates transcription	-3.92029	-2.38746	4/32	6233,7311,7314,7316	RPS27A,UBA52,UBB,UBC
4_Member	Reactome Gene Sets	R-HSA-5656169	Termination of translesion DNA synthesis	-3.92029	-2.38746	4/32	6233,7311,7314,7316	RPS27A,UBA52,UBB,UBC
4_Member	Reactome Gene Sets	R-HSA-917729	Endosomal Sorting Complex Required For Transport (ESCRT)	-3.92029	-2.38746	4/32	6233,7311,7314,7316	RPS27A,UBA52,UBB,UBC
4_Member	Reactome Gene Sets	R-HSA-168138	Toll Like Receptor 9 (TLR9) Cascade	-3.90445	-2.37485	6/96	3146,6233,6285,7311,7314,7316	HMGB1,RPS27A,S100B,UBA52,UBB,UBC
4_Member	Reactome Gene Sets	R-HSA-193704	p75 NTR receptor-mediated signalling	-3.87959	-2.35192	6/97	4974,5879,6233,7311,7314,7316	OMG,RAC1,RPS27A,UBA52,UBB,UBC
4_Member	GO Biological Processes	GO:0031098	stress-activated protein kinase signaling cascade	-3.86951	-2.34366	10/293	2185,2950,3146,5478,6233,7311,7314,7316,7430,140885	PTK2B,GSTP1,HMGB1,PPIA,RPS27A,UBA52,UBB,UBC,EZR,SIRPA
4_Member	Reactome Gene Sets	R-HSA-2559585	Oncogene Induced Senescence	-3.86689	-2.34366	4/33	6233,7311,7314,7316	RPS27A,UBA52,UBB,UBC
4_Member	Reactome Gene Sets	R-HSA-69620	Cell Cycle Checkpoints	-3.85748	-2.33769	10/294	1778,1780,5700,5716,6233,7311,7314,7316,8359,22919	DYNC1H1,DYNC1I1,PSMC1,PSMD10,RPS27A,UBA52,UBB,UBC,H4C1,MAPRE1
4_Member	Reactome Gene Sets	R-HSA-1236975	Antigen processing-Cross presentation	-3.85503	-2.33769	6/98	5700,5716,6233,7311,7314,7316	PSMC1,PSMD10,RPS27A,UBA52,UBB,UBC
4_Member	Reactome Gene Sets	R-HSA-168179	Toll Like Receptor TLR1:TLR2 Cascade	-3.85503	-2.33769	6/98	3146,6233,6285,7311,7314,7316	HMGB1,RPS27A,S100B,UBA52,UBB,UBC
4_Member	Reactome Gene Sets	R-HSA-181438	Toll Like Receptor 2 (TLR2) Cascade	-3.85503	-2.33769	6/98	3146,6233,6285,7311,7314,7316	HMGB1,RPS27A,S100B,UBA52,UBB,UBC
4_Member	Reactome Gene Sets	R-HSA-202424	Downstream TCR signaling	-3.85503	-2.33769	6/98	5700,5716,6233,7311,7314,7316	PSMC1,PSMD10,RPS27A,UBA52,UBB,UBC
4_Member	WikiPathways	WP183	Proteasome Degradation	-3.85461	-2.33769	5/62	5700,5716,7314,7316,7347	PSMC1,PSMD10,UBB,UBC,UCHL3
4_Member	GO Biological Processes	GO:0006401	RNA catabolic process	-3.83136	-2.31757	12/417	2521,4904,5700,5716,6133,6233,7311,7314,7316,57819,80349,201626	FUS,YBX1,PSMC1,PSMD10,RPL9,RPS27A,UBA52,UBB,UBC,LSM2,WDR61,PDE12
4_Member	Reactome Gene Sets	R-HSA-166166	MyD88-independent TLR4 cascade	-3.83076	-2.31757	6/99	3146,6233,6285,7311,7314,7316	HMGB1,RPS27A,S100B,UBA52,UBB,UBC
4_Member	Reactome Gene Sets	R-HSA-937061	TRIF(TICAM1)-mediated TLR4 signaling	-3.83076	-2.31757	6/99	3146,6233,6285,7311,7314,7316	HMGB1,RPS27A,S100B,UBA52,UBB,UBC
4_Member	Reactome Gene Sets	R-HSA-1834949	Cytosolic sensors of pathogen-associated DNA	-3.82151	-2.30956	5/63	5591,6233,7311,7314,7316	PRKDC,RPS27A,UBA52,UBB,UBC
4_Member	Reactome Gene Sets	R-HSA-9033241	Peroxisomal protein import	-3.82151	-2.30956	5/63	6233,7311,7314,7316,8239	RPS27A,UBA52,UBB,UBC,USP9X
4_Member	GO Biological Processes	GO:0002756	MyD88-independent toll-like receptor signaling pathway	-3.81525	-2.30454	4/34	6233,7311,7314,7316	RPS27A,UBA52,UBB,UBC
4_Member	Reactome Gene Sets	R-HSA-5663084	Diseases of carbohydrate metabolism	-3.81525	-2.30454	4/34	6233,7311,7314,7316	RPS27A,UBA52,UBB,UBC
4_Member	GO Biological Processes	GO:0002755	MyD88-dependent toll-like receptor signaling pathway	-3.76527	-2.26243	4/35	6233,7311,7314,7316	RPS27A,UBA52,UBB,UBC
4_Member	Reactome Gene Sets	R-HSA-5357905	Regulation of TNFR1 signaling	-3.76527	-2.26243	4/35	6233,7311,7314,7316	RPS27A,UBA52,UBB,UBC
4_Member	GO Biological Processes	GO:0002764	immune response-regulating signaling pathway	-3.764	-2.26243	16/698	801,3146,5700,5716,5879,6233,6271,6714,7070,7311,7314,7316,7430,8546,10384,29085	CALM1,HMGB1,PSMC1,PSMD10,RAC1,RPS27A,S100A1,SRC,THY1,UBA52,UBB,UBC,EZR,AP3B1,BTN3A3,PHPT1
4_Member	Reactome Gene Sets	R-HSA-5668541	TNFR2 non-canonical NF-kB pathway	-3.75959	-2.25862	6/102	5700,5716,6233,7311,7314,7316	PSMC1,PSMD10,RPS27A,UBA52,UBB,UBC
4_Member	Reactome Gene Sets	R-HSA-446203	Asparagine N-linked glycosylation	-3.73995	-2.24258	10/304	1778,1780,5700,6233,7311,7314,7316,54732,84617,84790	DYNC1H1,DYNC1I1,PSMC1,RPS27A,UBA52,UBB,UBC,TMED9,TUBB6,TUBA1C
4_Member	GO Biological Processes	GO:0070498	interleukin-1-mediated signaling pathway	-3.73639	-2.24141	6/103	5700,5716,6233,7311,7314,7316	PSMC1,PSMD10,RPS27A,UBA52,UBB,UBC
4_Member	Reactome Gene Sets	R-HSA-382556	ABC-family proteins mediated transport	-3.73639	-2.24141	6/103	5700,5716,6233,7311,7314,7316	PSMC1,PSMD10,RPS27A,UBA52,UBB,UBC
4_Member	Reactome Gene Sets	R-HSA-69278	Cell Cycle, Mitotic	-3.72997	-2.23558	14/561	1778,1780,5700,5716,6233,6714,7311,7314,7316,8359,22919,26003,84617,84790	DYNC1H1,DYNC1I1,PSMC1,PSMD10,RPS27A,SRC,UBA52,UBB,UBC,H4C1,MAPRE1,GORASP2,TUBB6,TUBA1C
4_Member	Reactome Gene Sets	R-HSA-6804757	Regulation of TP53 Degradation	-3.71683	-2.22362	4/36	6233,7311,7314,7316	RPS27A,UBA52,UBB,UBC
4_Member	Reactome Gene Sets	R-HSA-1280215	Cytokine Signaling in Immune system	-3.70146	-2.21061	16/707	1278,2185,2317,3146,5478,5700,5716,6233,6285,6616,6647,6804,7311,7314,7316,201626	COL1A2,PTK2B,FLNB,HMGB1,PPIA,PSMC1,PSMD10,RPS27A,S100B,SNAP25,SOD1,STX1A,UBA52,UBB,UBC,PDE12
4_Member	Reactome Gene Sets	R-HSA-453279	Mitotic G1 phase and G1/S transition	-3.68927	-2.19959	7/149	5700,5716,6233,6714,7311,7314,7316	PSMC1,PSMD10,RPS27A,SRC,UBA52,UBB,UBC
4_Member	GO Biological Processes	GO:0006296	nucleotide-excision repair, DNA incision, 5'-to lesion	-3.66986	-2.18646	4/37	6233,7311,7314,7316	RPS27A,UBA52,UBB,UBC
4_Member	Reactome Gene Sets	R-HSA-168638	NOD1/2 Signaling Pathway	-3.66986	-2.18646	4/37	6233,7311,7314,7316	RPS27A,UBA52,UBB,UBC
4_Member	Reactome Gene Sets	R-HSA-5689901	Metalloprotease DUBs	-3.66986	-2.18646	4/37	6233,7311,7314,7316	RPS27A,UBA52,UBB,UBC
4_Member	Reactome Gene Sets	R-HSA-6806003	Regulation of TP53 Expression and Degradation	-3.66986	-2.18646	4/37	6233,7311,7314,7316	RPS27A,UBA52,UBB,UBC
4_Member	GO Biological Processes	GO:0006625	protein targeting to peroxisome	-3.66442	-2.18346	5/68	6233,7311,7314,7316,8239	RPS27A,UBA52,UBB,UBC,USP9X
4_Member	GO Biological Processes	GO:0072662	protein localization to peroxisome	-3.66442	-2.18346	5/68	6233,7311,7314,7316,8239	RPS27A,UBA52,UBB,UBC,USP9X
4_Member	GO Biological Processes	GO:0072663	establishment of protein localization to peroxisome	-3.66442	-2.18346	5/68	6233,7311,7314,7316,8239	RPS27A,UBA52,UBB,UBC,USP9X
4_Member	GO Biological Processes	GO:0071560	cellular response to transforming growth factor beta stimulus	-3.64295	-2.16542	9/255	1278,3696,5138,6233,6714,7311,7314,7316,8239	COL1A2,ITGB8,PDE2A,RPS27A,SRC,UBA52,UBB,UBC,USP9X
4_Member	GO Biological Processes	GO:0043574	peroxisomal transport	-3.63456	-2.15931	5/69	6233,7311,7314,7316,8239	RPS27A,UBA52,UBB,UBC,USP9X
4_Member	GO Biological Processes	GO:0002758	innate immune response-activating signal transduction	-3.62725	-2.15405	10/314	3146,5700,5716,6233,6271,6714,7311,7314,7316,8546	HMGB1,PSMC1,PSMD10,RPS27A,S100A1,SRC,UBA52,UBB,UBC,AP3B1
4_Member	Reactome Gene Sets	R-HSA-9607240	FLT3 Signaling	-3.62427	-2.15405	4/38	6233,7311,7314,7316	RPS27A,UBA52,UBB,UBC
4_Member	GO Biological Processes	GO:0043406	positive regulation of MAP kinase activity	-3.61787	-2.14949	9/257	2185,5478,6233,6647,6714,7311,7314,7316,8826	PTK2B,PPIA,RPS27A,SOD1,SRC,UBA52,UBB,UBC,IQGAP1
4_Member	Reactome Gene Sets	R-HSA-400253	Circadian Clock	-3.60518	-2.13837	5/70	5936,6233,7311,7314,7316	RBM4,RPS27A,UBA52,UBB,UBC
4_Member	GO Biological Processes	GO:0043618	regulation of transcription from RNA polymerase II promoter in response to stress	-3.60249	-2.13633	6/109	5700,5716,6233,7311,7314,7316	PSMC1,PSMD10,RPS27A,UBA52,UBB,UBC
4_Member	Reactome Gene Sets	R-HSA-168898	Toll-like Receptor Cascades	-3.58432	-2.12255	7/155	3146,6233,6271,6285,7311,7314,7316	HMGB1,RPS27A,S100A1,S100B,UBA52,UBB,UBC
4_Member	GO Biological Processes	GO:0006289	nucleotide-excision repair	-3.58101	-2.12255	6/110	3146,5886,6233,7311,7314,7316	HMGB1,RAD23A,RPS27A,UBA52,UBB,UBC
4_Member	GO Biological Processes	GO:0033683	nucleotide-excision repair, DNA incision	-3.57999	-2.12255	4/39	6233,7311,7314,7316	RPS27A,UBA52,UBB,UBC
4_Member	GO Biological Processes	GO:0042769	DNA damage response, detection of DNA damage	-3.57999	-2.12255	4/39	6233,7311,7314,7316	RPS27A,UBA52,UBB,UBC
4_Member	Reactome Gene Sets	R-HSA-110313	Translesion synthesis by Y family DNA polymerases bypasses lesions on DNA template	-3.57999	-2.12255	4/39	6233,7311,7314,7316	RPS27A,UBA52,UBB,UBC
4_Member	GO Biological Processes	GO:0007179	transforming growth factor beta receptor signaling pathway	-3.57299	-2.11789	8/206	1278,3696,6233,6714,7311,7314,7316,8239	COL1A2,ITGB8,RPS27A,SRC,UBA52,UBB,UBC,USP9X
4_Member	GO Biological Processes	GO:0070555	response to interleukin-1	-3.57299	-2.11789	8/206	5700,5716,6233,6714,7311,7314,7316,140885	PSMC1,PSMD10,RPS27A,SRC,UBA52,UBB,UBC,SIRPA
4_Member	GO Biological Processes	GO:0071559	response to transforming growth factor beta	-3.56845	-2.11426	9/261	1278,3696,5138,6233,6714,7311,7314,7316,8239	COL1A2,ITGB8,PDE2A,RPS27A,SRC,UBA52,UBB,UBC,USP9X
4_Member	Reactome Gene Sets	R-HSA-1169408	ISG15 antiviral mechanism	-3.54783	-2.09741	5/72	2317,6233,7311,7314,7316	FLNB,RPS27A,UBA52,UBB,UBC
4_Member	GO Biological Processes	GO:0070423	nucleotide-binding oligomerization domain containing signaling pathway	-3.53695	-2.09027	4/40	6233,7311,7314,7316	RPS27A,UBA52,UBB,UBC
4_Member	Reactome Gene Sets	R-HSA-6783310	Fanconi Anemia Pathway	-3.53695	-2.09027	4/40	6233,7311,7314,7316	RPS27A,UBA52,UBB,UBC
4_Member	GO Biological Processes	GO:0007254	JNK cascade	-3.53074	-2.08459	8/209	2185,2950,3146,6233,7311,7314,7316,140885	PTK2B,GSTP1,HMGB1,RPS27A,UBA52,UBB,UBC,SIRPA
4_Member	Reactome Gene Sets	R-HSA-170834	Signaling by TGF-beta Receptor Complex	-3.51982	-2.07632	5/73	6233,7311,7314,7316,8239	RPS27A,UBA52,UBB,UBC,USP9X
4_Member	Reactome Gene Sets	R-HSA-5654738	Signaling by FGFR2	-3.51982	-2.07632	5/73	6233,6714,7311,7314,7316	RPS27A,SRC,UBA52,UBB,UBC
4_Member	GO Biological Processes	GO:0070848	response to growth factor	-3.5076	-2.06567	16/736	1278,2817,2950,3371,3696,4137,5138,6233,6714,7311,7314,7316,8239,8826,9693,92154	COL1A2,GPC1,GSTP1,TNC,ITGB8,MAPT,PDE2A,RPS27A,SRC,UBA52,UBB,UBC,USP9X,IQGAP1,RAPGEF2,MTSS2
4_Member	GO Biological Processes	GO:0002224	toll-like receptor signaling pathway	-3.50049	-2.0621	7/160	3146,6233,6271,7311,7314,7316,8546	HMGB1,RPS27A,S100A1,UBA52,UBB,UBC,AP3B1
4_Member	GO Biological Processes	GO:0035872	nucleotide-binding domain, leucine rich repeat containing receptor signaling pathway	-3.49508	-2.06149	4/41	6233,7311,7314,7316	RPS27A,UBA52,UBB,UBC
4_Member	Reactome Gene Sets	R-HSA-5696400	Dual Incision in GG-NER	-3.49508	-2.06149	4/41	6233,7311,7314,7316	RPS27A,UBA52,UBB,UBC
4_Member	GO Biological Processes	GO:0002757	immune response-activating signal transduction	-3.49443	-2.06135	15/664	3146,5700,5716,5879,6233,6271,6714,7070,7311,7314,7316,7430,8546,10384,29085	HMGB1,PSMC1,PSMD10,RAC1,RPS27A,S100A1,SRC,THY1,UBA52,UBB,UBC,EZR,AP3B1,BTN3A3,PHPT1
4_Member	GO Biological Processes	GO:0043620	regulation of DNA-templated transcription in response to stress	-3.47687	-2.04738	6/115	5700,5716,6233,7311,7314,7316	PSMC1,PSMD10,RPS27A,UBA52,UBB,UBC
4_Member	GO Biological Processes	GO:0019985	translesion synthesis	-3.45433	-2.02841	4/42	6233,7311,7314,7316	RPS27A,UBA52,UBB,UBC
4_Member	Reactome Gene Sets	R-HSA-3769402	Deactivation of the beta-catenin transactivating complex	-3.45433	-2.02841	4/42	6233,7311,7314,7316	RPS27A,UBA52,UBB,UBC
4_Member	Reactome Gene Sets	R-HSA-204998	Cell death signalling via NRAGE, NRIF and NADE	-3.43834	-2.01545	5/76	5879,6233,7311,7314,7316	RAC1,RPS27A,UBA52,UBB,UBC
4_Member	Reactome Gene Sets	R-HSA-5675221	Negative regulation of MAPK pathway	-3.41464	-1.99675	4/43	6233,7311,7314,7316	RPS27A,UBA52,UBB,UBC
4_Member	Reactome Gene Sets	R-HSA-5693565	Recruitment and ATM-mediated phosphorylation of repair and signaling proteins at DNA double strand breaks	-3.41199	-1.99509	5/77	6233,7311,7314,7316,8359	RPS27A,UBA52,UBB,UBC,H4C1
4_Member	GO Biological Processes	GO:0043405	regulation of MAP kinase activity	-3.39485	-1.97944	10/336	2185,2950,5478,6233,6647,6714,7311,7314,7316,8826	PTK2B,GSTP1,PPIA,RPS27A,SOD1,SRC,UBA52,UBB,UBC,IQGAP1
4_Member	Reactome Gene Sets	R-HSA-5693606	DNA Double Strand Break Response	-3.38602	-1.9716	5/78	6233,7311,7314,7316,8359	RPS27A,UBA52,UBB,UBC,H4C1
4_Member	Reactome Gene Sets	R-HSA-5689880	Ub-specific processing proteases	-3.38197	-1.96854	8/220	5700,5716,6233,7311,7314,7316,8239,27430	PSMC1,PSMD10,RPS27A,UBA52,UBB,UBC,USP9X,MAT2B
4_Member	Reactome Gene Sets	R-HSA-69239	Synthesis of DNA	-3.37788	-1.96498	6/120	5700,5716,6233,7311,7314,7316	PSMC1,PSMD10,RPS27A,UBA52,UBB,UBC
4_Member	Reactome Gene Sets	R-HSA-75893	TNF signaling	-3.37596	-1.96498	4/44	6233,7311,7314,7316	RPS27A,UBA52,UBB,UBC
4_Member	Reactome Gene Sets	R-HSA-9694635	Translation of structural proteins	-3.37596	-1.96498	4/44	6233,7311,7314,7316	RPS27A,UBA52,UBB,UBC
4_Member	Reactome Gene Sets	R-HSA-69481	G2/M Checkpoints	-3.37269	-1.96268	7/168	5700,5716,6233,7311,7314,7316,8359	PSMC1,PSMD10,RPS27A,UBA52,UBB,UBC,H4C1
4_Member	Reactome Gene Sets	R-HSA-9010553	Regulation of expression of SLITs and ROBOs	-3.32664	-1.92246	7/171	5700,5716,6133,6233,7311,7314,7316	PSMC1,PSMD10,RPL9,RPS27A,UBA52,UBB,UBC
4_Member	GO Biological Processes	GO:0043410	positive regulation of MAPK cascade	-3.32365	-1.92043	13/544	1652,2185,3146,4035,5478,6233,6647,6714,7311,7314,7316,8826,9693	DDT,PTK2B,HMGB1,LRP1,PPIA,RPS27A,SOD1,SRC,UBA52,UBB,UBC,IQGAP1,RAPGEF2
4_Member	GO Biological Processes	GO:0016579	protein deubiquitination	-3.30176	-1.90301	9/284	5700,5716,5886,6233,7311,7314,7316,7347,8239	PSMC1,PSMD10,RAD23A,RPS27A,UBA52,UBB,UBC,UCHL3,USP9X
4_Member	Reactome Gene Sets	R-HSA-5619115	Disorders of transmembrane transporters	-3.26674	-1.8765	7/175	5700,5716,6233,6520,7311,7314,7316	PSMC1,PSMD10,RPS27A,SLC3A2,UBA52,UBB,UBC
4_Member	Reactome Gene Sets	R-HSA-5696399	Global Genome Nucleotide Excision Repair (GG-NER)	-3.23779	-1.85109	5/84	5886,6233,7311,7314,7316	RAD23A,RPS27A,UBA52,UBB,UBC
4_Member	Reactome Gene Sets	R-HSA-512988	Interleukin-3, Interleukin-5 and GM-CSF signaling	-3.23045	-1.84605	4/48	6233,7311,7314,7316	RPS27A,UBA52,UBB,UBC
4_Member	Reactome Gene Sets	R-HSA-73893	DNA Damage Bypass	-3.23045	-1.84605	4/48	6233,7311,7314,7316	RPS27A,UBA52,UBB,UBC
4_Member	Reactome Gene Sets	R-HSA-69306	DNA Replication	-3.22914	-1.84567	6/128	5700,5716,6233,7311,7314,7316	PSMC1,PSMD10,RPS27A,UBA52,UBB,UBC
4_Member	GO Biological Processes	GO:0071363	cellular response to growth factor stimulus	-3.21224	-1.83243	15/707	1278,2817,2950,3696,4137,5138,6233,6714,7311,7314,7316,8239,8826,9693,92154	COL1A2,GPC1,GSTP1,ITGB8,MAPT,PDE2A,RPS27A,SRC,UBA52,UBB,UBC,USP9X,IQGAP1,RAPGEF2,MTSS2
4_Member	Reactome Gene Sets	R-HSA-166016	Toll Like Receptor 4 (TLR4) Cascade	-3.21132	-1.83197	6/129	3146,6233,6285,7311,7314,7316	HMGB1,RPS27A,S100B,UBA52,UBB,UBC
4_Member	GO Biological Processes	GO:0071347	cellular response to interleukin-1	-3.19417	-1.81799	7/180	5700,5716,6233,7311,7314,7316,140885	PSMC1,PSMD10,RPS27A,UBA52,UBB,UBC,SIRPA
4_Member	Reactome Gene Sets	R-HSA-69206	G1/S Transition	-3.17617	-1.80224	6/131	5700,5716,6233,7311,7314,7316	PSMC1,PSMD10,RPS27A,UBA52,UBB,UBC
4_Member	Reactome Gene Sets	R-HSA-190236	Signaling by FGFR	-3.16815	-1.79467	5/87	6233,6714,7311,7314,7316	RPS27A,SRC,UBA52,UBB,UBC
4_Member	Reactome Gene Sets	R-HSA-8878171	Transcriptional regulation by RUNX1	-3.14562	-1.7752	8/239	5700,5716,6233,6714,7311,7314,7316,8359	PSMC1,PSMD10,RPS27A,SRC,UBA52,UBB,UBC,H4C1
4_Member	Reactome Gene Sets	R-HSA-9678108	SARS-CoV-1 Infection	-3.1299	-1.76178	4/51	6233,7311,7314,7316	RPS27A,UBA52,UBB,UBC
4_Member	GO Biological Processes	GO:0070646	protein modification by small protein removal	-3.12182	-1.75635	9/301	5700,5716,5886,6233,7311,7314,7316,7347,8239	PSMC1,PSMD10,RAD23A,RPS27A,UBA52,UBB,UBC,UCHL3,USP9X
4_Member	GO Biological Processes	GO:0010942	positive regulation of cell death	-3.10157	-1.73874	15/725	102,637,3146,4035,4137,5533,5591,6233,6647,6714,7311,7314,7316,9647,9693	ADAM10,BID,HMGB1,LRP1,MAPT,PPP3CC,PRKDC,RPS27A,SOD1,SRC,UBA52,UBB,UBC,PPM1F,RAPGEF2
4_Member	GO Biological Processes	GO:0000731	DNA synthesis involved in DNA repair	-3.06648	-1.70844	4/53	6233,7311,7314,7316	RPS27A,UBA52,UBB,UBC
4_Member	GO Biological Processes	GO:0006301	postreplication repair	-3.06648	-1.70844	4/53	6233,7311,7314,7316	RPS27A,UBA52,UBB,UBC
4_Member	Reactome Gene Sets	R-HSA-6781823	Formation of TC-NER Pre-Incision Complex	-3.03576	-1.68246	4/54	6233,7311,7314,7316	RPS27A,UBA52,UBB,UBC
4_Member	Reactome Gene Sets	R-HSA-6807070	PTEN Regulation	-3.0255	-1.67349	6/140	5700,5716,6233,7311,7314,7316	PSMC1,PSMD10,RPS27A,UBA52,UBB,UBC
4_Member	GO Biological Processes	GO:0043065	positive regulation of apoptotic process	-3.01916	-1.66801	14/662	102,637,3146,4137,5533,5591,6233,6647,6714,7311,7314,7316,9647,9693	ADAM10,BID,HMGB1,MAPT,PPP3CC,PRKDC,RPS27A,SOD1,SRC,UBA52,UBB,UBC,PPM1F,RAPGEF2
4_Member	Reactome Gene Sets	R-HSA-73887	Death Receptor Signalling	-3.00948	-1.66045	6/141	4974,5879,6233,7311,7314,7316	OMG,RAC1,RPS27A,UBA52,UBB,UBC
4_Member	Reactome Gene Sets	R-HSA-168643	Nucleotide-binding domain, leucine rich repeat containing receptor (NLR) signaling pathways	-2.97619	-1.6339	4/56	6233,7311,7314,7316	RPS27A,UBA52,UBB,UBC
4_Member	GO Biological Processes	GO:0043068	positive regulation of programmed cell death	-2.96966	-1.62862	14/670	102,637,3146,4137,5533,5591,6233,6647,6714,7311,7314,7316,9647,9693	ADAM10,BID,HMGB1,MAPT,PPP3CC,PRKDC,RPS27A,SOD1,SRC,UBA52,UBB,UBC,PPM1F,RAPGEF2
4_Member	GO Biological Processes	GO:0071897	DNA biosynthetic process	-2.95202	-1.61389	7/198	2185,5478,6233,6714,7311,7314,7316	PTK2B,PPIA,RPS27A,SRC,UBA52,UBB,UBC
4_Member	GO Biological Processes	GO:0036297	interstrand cross-link repair	-2.94729	-1.60999	4/57	6233,7311,7314,7316	RPS27A,UBA52,UBB,UBC
4_Member	GO Biological Processes	GO:0075733	intracellular transport of virus	-2.94729	-1.60999	4/57	6233,7311,7314,7316	RPS27A,UBA52,UBB,UBC
4_Member	WikiPathways	WP3594	Circadian rhythm related genes	-2.93937	-1.60372	7/199	5582,5591,5936,6233,7311,7316,9456	PRKCG,PRKDC,RBM4,RPS27A,UBA52,UBC,HOMER1
4_Member	Reactome Gene Sets	R-HSA-5693607	Processing of DNA double-strand break ends	-2.9346	-1.59936	5/98	6233,7311,7314,7316,8359	RPS27A,UBA52,UBB,UBC,H4C1
4_Member	Reactome Gene Sets	R-HSA-9006936	Signaling by TGFB family members	-2.85711	-1.53364	5/102	6233,7311,7314,7316,8239	RPS27A,UBA52,UBB,UBC,USP9X
4_Member	GO Biological Processes	GO:0032147	activation of protein kinase activity	-2.85264	-1.52957	9/329	2185,3146,5478,6233,6647,6714,7311,7314,7316	PTK2B,HMGB1,PPIA,RPS27A,SOD1,SRC,UBA52,UBB,UBC
4_Member	Reactome Gene Sets	R-HSA-1640170	Cell Cycle	-2.838	-1.51811	14/692	1778,1780,5700,5716,6233,6714,7311,7314,7316,8359,22919,26003,84617,84790	DYNC1H1,DYNC1I1,PSMC1,PSMD10,RPS27A,SRC,UBA52,UBB,UBC,H4C1,MAPRE1,GORASP2,TUBB6,TUBA1C
4_Member	Reactome Gene Sets	R-HSA-1257604	PIP3 activates AKT signaling	-2.83753	-1.51806	8/267	5700,5716,5879,6233,6714,7311,7314,7316	PSMC1,PSMD10,RAC1,RPS27A,SRC,UBA52,UBB,UBC
4_Member	GO Biological Processes	GO:0002221	pattern recognition receptor signaling pathway	-2.79352	-1.48189	7/211	3146,6233,6271,7311,7314,7316,8546	HMGB1,RPS27A,S100A1,UBA52,UBB,UBC,AP3B1
4_Member	GO Biological Processes	GO:0000187	activation of MAPK activity	-2.78434	-1.47427	6/156	5478,6233,6647,7311,7314,7316	PPIA,RPS27A,SOD1,UBA52,UBB,UBC
4_Member	GO Biological Processes	GO:0046794	transport of virus	-2.75978	-1.45599	4/64	6233,7311,7314,7316	RPS27A,UBA52,UBB,UBC
4_Member	Reactome Gene Sets	R-HSA-450294	MAP kinase activation	-2.75978	-1.45599	4/64	6233,7311,7314,7316	RPS27A,UBA52,UBB,UBC
4_Member	Reactome Gene Sets	R-HSA-6782210	Gap-filling DNA repair synthesis and ligation in TC-NER	-2.73489	-1.43706	4/65	6233,7311,7314,7316	RPS27A,UBA52,UBB,UBC
4_Member	Reactome Gene Sets	R-HSA-6782135	Dual incision in TC-NER	-2.71043	-1.41636	4/66	6233,7311,7314,7316	RPS27A,UBA52,UBB,UBC
4_Member	Reactome Gene Sets	R-HSA-69242	S Phase	-2.70153	-1.40858	6/162	5700,5716,6233,7311,7314,7316	PSMC1,PSMD10,RPS27A,UBA52,UBB,UBC
4_Member	Reactome Gene Sets	R-HSA-5696398	Nucleotide Excision Repair	-2.69506	-1.40248	5/111	5886,6233,7311,7314,7316	RAD23A,RPS27A,UBA52,UBB,UBC
4_Member	GO Biological Processes	GO:0007249	I-kappaB kinase/NF-kappaB signaling	-2.68915	-1.39769	8/282	2950,6233,6285,7311,7314,7316,57506,140885	GSTP1,RPS27A,S100B,UBA52,UBB,UBC,MAVS,SIRPA
4_Member	Reactome Gene Sets	R-HSA-5685942	HDR through Homologous Recombination (HRR)	-2.6864	-1.39679	4/67	6233,7311,7314,7316	RPS27A,UBA52,UBB,UBC
4_Member	GO Biological Processes	GO:0019058	viral life cycle	-2.67838	-1.39057	9/349	5478,5886,6233,7155,7311,7314,7316,57506,201626	PPIA,RAD23A,RPS27A,TOP2B,UBA52,UBB,UBC,MAVS,PDE12
4_Member	Reactome Gene Sets	R-HSA-2559582	Senescence-Associated Secretory Phenotype (SASP)	-2.67802	-1.39057	5/112	6233,7311,7314,7316,8359	RPS27A,UBA52,UBB,UBC,H4C1
4_Member	Reactome Gene Sets	R-HSA-9694516	SARS-CoV-2 Infection	-2.66276	-1.38013	4/68	6233,7311,7314,7316	RPS27A,UBA52,UBB,UBC
4_Member	GO Biological Processes	GO:0032392	DNA geometric change	-2.64446	-1.36401	5/114	3146,6233,7311,7314,7316	HMGB1,RPS27A,UBA52,UBB,UBC
4_Member	Reactome Gene Sets	R-HSA-5693532	DNA Double-Strand Break Repair	-2.63534	-1.35886	6/167	5591,6233,7311,7314,7316,8359	PRKDC,RPS27A,UBA52,UBB,UBC,H4C1
4_Member	Reactome Gene Sets	R-HSA-448424	Interleukin-17 signaling	-2.57204	-1.30445	4/72	6233,7311,7314,7316	RPS27A,UBA52,UBB,UBC
4_Member	Reactome Gene Sets	R-HSA-201681	TCF dependent signaling in response to WNT	-2.55155	-1.28826	7/233	5700,5716,6233,7311,7314,7316,8359	PSMC1,PSMD10,RPS27A,UBA52,UBB,UBC,H4C1
4_Member	GO Biological Processes	GO:0002753	cytoplasmic pattern recognition receptor signaling pathway	-2.55026	-1.28826	4/73	6233,7311,7314,7316	RPS27A,UBA52,UBB,UBC
4_Member	GO Biological Processes	GO:0006283	transcription-coupled nucleotide-excision repair	-2.55026	-1.28826	4/73	6233,7311,7314,7316	RPS27A,UBA52,UBB,UBC
4_Member	Reactome Gene Sets	R-HSA-8951664	Neddylation	-2.54125	-1.28065	7/234	5700,5716,6233,7311,7314,7316,7347	PSMC1,PSMD10,RPS27A,UBA52,UBB,UBC,UCHL3
4_Member	GO Biological Processes	GO:0044766	multi-organism transport	-2.50771	-1.2526	4/75	6233,7311,7314,7316	RPS27A,UBA52,UBB,UBC
4_Member	GO Biological Processes	GO:1902579	multi-organism localization	-2.50771	-1.2526	4/75	6233,7311,7314,7316	RPS27A,UBA52,UBB,UBC
4_Member	Reactome Gene Sets	R-HSA-2559580	Oxidative Stress Induced Senescence	-2.47161	-1.22127	5/125	6233,7311,7314,7316,8359	RPS27A,UBA52,UBB,UBC,H4C1
4_Member	Reactome Gene Sets	R-HSA-6781827	Transcription-Coupled Nucleotide Excision Repair (TC-NER)	-2.42638	-1.18342	4/79	6233,7311,7314,7316	RPS27A,UBA52,UBB,UBC
4_Member	Reactome Gene Sets	R-HSA-5693567	HDR through Homologous Recombination (HRR) or Single Strand Annealing (SSA)	-2.37086	-1.13711	5/132	6233,7311,7314,7316,8359	RPS27A,UBA52,UBB,UBC,H4C1
4_Member	GO Biological Processes	GO:0030512	negative regulation of transforming growth factor beta receptor signaling pathway	-2.29493	-1.07274	4/86	6233,7311,7314,7316	RPS27A,UBA52,UBB,UBC
4_Member	Reactome Gene Sets	R-HSA-5693538	Homology Directed Repair	-2.28952	-1.06923	5/138	6233,7311,7314,7316,8359	RPS27A,UBA52,UBB,UBC,H4C1
4_Member	Reactome Gene Sets	R-HSA-162599	Late Phase of HIV Life Cycle	-2.27638	-1.05799	5/139	5478,6233,7311,7314,7316	PPIA,RPS27A,UBA52,UBB,UBC
4_Member	Reactome Gene Sets	R-HSA-913531	Interferon Signaling	-2.26308	-1.04531	6/199	2317,6233,7311,7314,7316,201626	FLNB,RPS27A,UBA52,UBB,UBC,PDE12
4_Member	GO Biological Processes	GO:1903845	negative regulation of cellular response to transforming growth factor beta stimulus	-2.24236	-1.02771	4/89	6233,7311,7314,7316	RPS27A,UBA52,UBB,UBC
4_Member	GO Biological Processes	GO:0051091	positive regulation of DNA-binding transcription factor activity	-2.23918	-1.02485	7/266	4345,5478,6233,7311,7314,7316,57506	CD200,PPIA,RPS27A,UBA52,UBB,UBC,MAVS
4_Member	Reactome Gene Sets	R-HSA-6804756	Regulation of TP53 Activity through Phosphorylation	-2.19182	-0.985816	4/92	6233,7311,7314,7316	RPS27A,UBA52,UBB,UBC
4_Member	Reactome Gene Sets	R-HSA-156842	Eukaryotic Translation Elongation	-2.17541	-0.971123	4/93	1933,6133,6233,7311	EEF1B2,RPL9,RPS27A,UBA52
4_Member	Reactome Gene Sets	R-HSA-9679506	SARS-CoV Infections	-2.1753	-0.971123	5/147	6233,7311,7314,7316,53826	RPS27A,UBA52,UBB,UBC,FXYD6
4_Member	GO Biological Processes	GO:0000956	nuclear-transcribed mRNA catabolic process	-2.1523	-0.951757	6/210	6133,6233,7311,57819,80349,201626	RPL9,RPS27A,UBA52,LSM2,WDR61,PDE12
4_Member	GO Biological Processes	GO:0006612	protein targeting to membrane	-2.1426	-0.945663	6/211	2039,6133,6233,6726,7311,27342	DMTN,RPL9,RPS27A,SRP9,UBA52,RABGEF1
4_Member	Reactome Gene Sets	R-HSA-162587	HIV Life Cycle	-2.11551	-0.923037	5/152	5478,6233,7311,7314,7316	PPIA,RPS27A,UBA52,UBB,UBC
4_Member	Reactome Gene Sets	R-HSA-8953854	Metabolism of RNA	-2.08061	-0.892844	12/673	2521,4904,5700,5716,6133,6233,7311,7314,7316,23451,57819,80349	FUS,YBX1,PSMC1,PSMD10,RPL9,RPS27A,UBA52,UBB,UBC,SF3B1,LSM2,WDR61
4_Member	Reactome Gene Sets	R-HSA-168255	Influenza Infection	-2.06942	-0.884281	5/156	293,1211,6133,6233,7311	SLC25A6,CLTA,RPL9,RPS27A,UBA52
4_Member	GO Biological Processes	GO:0007178	transmembrane receptor protein serine/threonine kinase signaling pathway	-2.03856	-0.858919	8/363	1278,3696,6233,6714,7311,7314,7316,8239	COL1A2,ITGB8,RPS27A,SRC,UBA52,UBB,UBC,USP9X
4_Member	GO Biological Processes	GO:0051092	positive regulation of NF-kappaB transcription factor activity	-2.02478	-0.848774	5/160	5478,6233,7311,7314,7316	PPIA,RPS27A,UBA52,UBB,UBC
5_Summary	GO Biological Processes	GO:0099504	synaptic vesicle cycle	-10.7473	-7.32946	15/179	801,808,5533,5582,6616,6623,6804,8499,8541,8546,8943,9900,26059,80331,112755,1778,1780,54732,805,4134,4137,7314,7430,2185,5879,133121,140885,22919,55207,358,4884,6714,7143,9456,9693,7442,2039,534,1211,1212,291,8402,513,23451,64756,7447,6520,293,25874,2023,54927,5250	CALM1,CALM3,PPP3CC,PRKCG,SNAP25,SNCG,STX1A,PPFIA2,PPFIA3,AP3B1,AP3D1,SV2A,ERC2,DNAJC5,STX1B,DYNC1H1,DYNC1I1,TMED9,CALM2,MAP4,MAPT,UBB,EZR,PTK2B,RAC1,ENPP6,SIRPA,MAPRE1,ARL8B,AQP1,NPTX1,SRC,TNR,HOMER1,RAPGEF2,TRPV1,DMTN,ATP6V1G2,CLTA,CLTB,SLC25A4,SLC25A11,ATP5F1D,SF3B1,ATPAF1,VSNL1,SLC3A2,SLC25A6,MPC2,ENO1,CHCHD3,SLC25A3
5_Member	GO Biological Processes	GO:0099504	synaptic vesicle cycle	-10.7473	-7.32946	15/179	801,808,5533,5582,6616,6623,6804,8499,8541,8546,8943,9900,26059,80331,112755	CALM1,CALM3,PPP3CC,PRKCG,SNAP25,SNCG,STX1A,PPFIA2,PPFIA3,AP3B1,AP3D1,SV2A,ERC2,DNAJC5,STX1B
5_Member	GO Biological Processes	GO:0099003	vesicle-mediated transport in synapse	-10.28	-7.06282	15/193	801,808,5533,5582,6616,6623,6804,8499,8541,8546,8943,9900,26059,80331,112755	CALM1,CALM3,PPP3CC,PRKCG,SNAP25,SNCG,STX1A,PPFIA2,PPFIA3,AP3B1,AP3D1,SV2A,ERC2,DNAJC5,STX1B
5_Member	GO Biological Processes	GO:0048489	synaptic vesicle transport	-9.98442	-6.88079	13/139	801,808,5582,6616,6804,8499,8541,8546,8943,9900,26059,80331,112755	CALM1,CALM3,PRKCG,SNAP25,STX1A,PPFIA2,PPFIA3,AP3B1,AP3D1,SV2A,ERC2,DNAJC5,STX1B
5_Member	GO Biological Processes	GO:0097480	establishment of synaptic vesicle localization	-9.98442	-6.88079	13/139	801,808,5582,6616,6804,8499,8541,8546,8943,9900,26059,80331,112755	CALM1,CALM3,PRKCG,SNAP25,STX1A,PPFIA2,PPFIA3,AP3B1,AP3D1,SV2A,ERC2,DNAJC5,STX1B
5_Member	GO Biological Processes	GO:0097479	synaptic vesicle localization	-9.64191	-6.65972	13/148	801,808,5582,6616,6804,8499,8541,8546,8943,9900,26059,80331,112755	CALM1,CALM3,PRKCG,SNAP25,STX1A,PPFIA2,PPFIA3,AP3B1,AP3D1,SV2A,ERC2,DNAJC5,STX1B
5_Member	GO Biological Processes	GO:0016079	synaptic vesicle exocytosis	-9.10847	-6.25977	11/104	801,808,5582,6616,6804,8499,8541,9900,26059,80331,112755	CALM1,CALM3,PRKCG,SNAP25,STX1A,PPFIA2,PPFIA3,SV2A,ERC2,DNAJC5,STX1B
5_Member	GO Biological Processes	GO:0051650	establishment of vesicle localization	-8.49741	-5.81974	16/301	801,808,1778,1780,5582,6616,6804,8499,8541,8546,8943,9900,26059,54732,80331,112755	CALM1,CALM3,DYNC1H1,DYNC1I1,PRKCG,SNAP25,STX1A,PPFIA2,PPFIA3,AP3B1,AP3D1,SV2A,ERC2,TMED9,DNAJC5,STX1B
5_Member	Reactome Gene Sets	R-HSA-5339562	Uptake and actions of bacterial toxins	-8.37082	-5.75803	7/31	801,805,808,6616,6804,9900,112755	CALM1,CALM2,CALM3,SNAP25,STX1A,SV2A,STX1B
5_Member	GO Biological Processes	GO:0007269	neurotransmitter secretion	-8.31444	-5.73368	12/155	801,808,5582,6616,6623,6804,8499,8541,9900,26059,80331,112755	CALM1,CALM3,PRKCG,SNAP25,SNCG,STX1A,PPFIA2,PPFIA3,SV2A,ERC2,DNAJC5,STX1B
5_Member	GO Biological Processes	GO:0099643	signal release from synapse	-8.28272	-5.71621	12/156	801,808,5582,6616,6623,6804,8499,8541,9900,26059,80331,112755	CALM1,CALM3,PRKCG,SNAP25,SNCG,STX1A,PPFIA2,PPFIA3,SV2A,ERC2,DNAJC5,STX1B
5_Member	GO Biological Processes	GO:0051648	vesicle localization	-8.23589	-5.70305	16/314	801,808,1778,1780,5582,6616,6804,8499,8541,8546,8943,9900,26059,54732,80331,112755	CALM1,CALM3,DYNC1H1,DYNC1I1,PRKCG,SNAP25,STX1A,PPFIA2,PPFIA3,AP3B1,AP3D1,SV2A,ERC2,TMED9,DNAJC5,STX1B
5_Member	GO Biological Processes	GO:0051656	establishment of organelle localization	-7.97852	-5.50043	20/526	801,808,1778,1780,4134,4137,5582,6616,6804,7314,7430,8499,8541,8546,8943,9900,26059,54732,80331,112755	CALM1,CALM3,DYNC1H1,DYNC1I1,MAP4,MAPT,PRKCG,SNAP25,STX1A,UBB,EZR,PPFIA2,PPFIA3,AP3B1,AP3D1,SV2A,ERC2,TMED9,DNAJC5,STX1B
5_Member	GO Biological Processes	GO:0017156	calcium ion regulated exocytosis	-7.80015	-5.37066	11/138	801,808,5582,6616,6804,8499,8541,9900,26059,80331,112755	CALM1,CALM3,PRKCG,SNAP25,STX1A,PPFIA2,PPFIA3,SV2A,ERC2,DNAJC5,STX1B
5_Member	GO Biological Processes	GO:0001505	regulation of neurotransmitter levels	-7.73159	-5.32692	16/341	801,808,2185,5582,5879,6616,6623,6804,8499,8541,9900,26059,80331,112755,133121,140885	CALM1,CALM3,PTK2B,PRKCG,RAC1,SNAP25,SNCG,STX1A,PPFIA2,PPFIA3,SV2A,ERC2,DNAJC5,STX1B,ENPP6,SIRPA
5_Member	GO Biological Processes	GO:0051640	organelle localization	-6.9853	-4.7163	22/725	801,808,1778,1780,4134,4137,5582,6616,6804,7314,7430,8499,8541,8546,8943,9900,22919,26059,54732,55207,80331,112755	CALM1,CALM3,DYNC1H1,DYNC1I1,MAP4,MAPT,PRKCG,SNAP25,STX1A,UBB,EZR,PPFIA2,PPFIA3,AP3B1,AP3D1,SV2A,MAPRE1,ERC2,TMED9,ARL8B,DNAJC5,STX1B
5_Member	GO Biological Processes	GO:0036465	synaptic vesicle recycling	-6.94337	-4.68917	8/72	801,808,5533,6623,6804,8546,8943,112755	CALM1,CALM3,PPP3CC,SNCG,STX1A,AP3B1,AP3D1,STX1B
5_Member	GO Biological Processes	GO:0006836	neurotransmitter transport	-6.66056	-4.47484	13/262	358,801,808,5582,6616,6623,6804,8499,8541,9900,26059,80331,112755	AQP1,CALM1,CALM3,PRKCG,SNAP25,SNCG,STX1A,PPFIA2,PPFIA3,SV2A,ERC2,DNAJC5,STX1B
5_Member	GO Biological Processes	GO:0050804	modulation of chemical synaptic transmission	-6.52309	-4.36558	16/418	801,808,2185,4137,4884,5582,6616,6623,6714,6804,7143,8499,8541,9456,9693,112755	CALM1,CALM3,PTK2B,MAPT,NPTX1,PRKCG,SNAP25,SNCG,SRC,STX1A,TNR,PPFIA2,PPFIA3,HOMER1,RAPGEF2,STX1B
5_Member	GO Biological Processes	GO:0099177	regulation of trans-synaptic signaling	-6.50923	-4.35445	16/419	801,808,2185,4137,4884,5582,6616,6623,6714,6804,7143,8499,8541,9456,9693,112755	CALM1,CALM3,PTK2B,MAPT,NPTX1,PRKCG,SNAP25,SNCG,SRC,STX1A,TNR,PPFIA2,PPFIA3,HOMER1,RAPGEF2,STX1B
5_Member	GO Biological Processes	GO:0016082	synaptic vesicle priming	-6.47866	-4.32658	5/19	6616,6804,9900,26059,112755	SNAP25,STX1A,SV2A,ERC2,STX1B
5_Member	Reactome Gene Sets	R-HSA-5250971	Toxicity of botulinum toxin type C (botC)	-6.29687	-4.18593	3/3	6616,6804,112755	SNAP25,STX1A,STX1B
5_Member	GO Biological Processes	GO:0007268	chemical synaptic transmission	-6.1423	-4.05523	20/684	801,808,2185,4137,4884,5582,6616,6623,6714,6804,7143,7442,8499,8541,9456,9693,9900,26059,80331,112755	CALM1,CALM3,PTK2B,MAPT,NPTX1,PRKCG,SNAP25,SNCG,SRC,STX1A,TNR,TRPV1,PPFIA2,PPFIA3,HOMER1,RAPGEF2,SV2A,ERC2,DNAJC5,STX1B
5_Member	GO Biological Processes	GO:0098916	anterograde trans-synaptic signaling	-6.1423	-4.05523	20/684	801,808,2185,4137,4884,5582,6616,6623,6714,6804,7143,7442,8499,8541,9456,9693,9900,26059,80331,112755	CALM1,CALM3,PTK2B,MAPT,NPTX1,PRKCG,SNAP25,SNCG,SRC,STX1A,TNR,TRPV1,PPFIA2,PPFIA3,HOMER1,RAPGEF2,SV2A,ERC2,DNAJC5,STX1B
5_Member	Reactome Gene Sets	R-HSA-168799	Neurotoxicity of clostridium toxins	-6.09388	-4.01828	4/10	6616,6804,9900,112755	SNAP25,STX1A,SV2A,STX1B
5_Member	GO Biological Processes	GO:0099537	trans-synaptic signaling	-6.07399	-4.00064	20/691	801,808,2185,4137,4884,5582,6616,6623,6714,6804,7143,7442,8499,8541,9456,9693,9900,26059,80331,112755	CALM1,CALM3,PTK2B,MAPT,NPTX1,PRKCG,SNAP25,SNCG,SRC,STX1A,TNR,TRPV1,PPFIA2,PPFIA3,HOMER1,RAPGEF2,SV2A,ERC2,DNAJC5,STX1B
5_Member	GO Biological Processes	GO:0099536	synaptic signaling	-5.98752	-3.93269	20/700	801,808,2185,4137,4884,5582,6616,6623,6714,6804,7143,7442,8499,8541,9456,9693,9900,26059,80331,112755	CALM1,CALM3,PTK2B,MAPT,NPTX1,PRKCG,SNAP25,SNCG,SRC,STX1A,TNR,TRPV1,PPFIA2,PPFIA3,HOMER1,RAPGEF2,SV2A,ERC2,DNAJC5,STX1B
5_Member	GO Biological Processes	GO:0098693	regulation of synaptic vesicle cycle	-5.9703	-3.92102	8/96	801,808,5533,5582,6804,8499,80331,112755	CALM1,CALM3,PPP3CC,PRKCG,STX1A,PPFIA2,DNAJC5,STX1B
5_Member	GO Biological Processes	GO:0016081	synaptic vesicle docking	-5.90032	-3.87587	4/11	6616,6804,8541,112755	SNAP25,STX1A,PPFIA3,STX1B
5_Member	GO Biological Processes	GO:0140029	exocytic process	-5.43298	-3.51183	7/80	2039,6616,6804,8541,9900,26059,112755	DMTN,SNAP25,STX1A,PPFIA3,SV2A,ERC2,STX1B
5_Member	GO Biological Processes	GO:0046928	regulation of neurotransmitter secretion	-5.09092	-3.26604	7/90	801,808,5582,6623,6804,8499,112755	CALM1,CALM3,PRKCG,SNCG,STX1A,PPFIA2,STX1B
5_Member	Reactome Gene Sets	R-HSA-264642	Acetylcholine Neurotransmitter Release Cycle	-5.05865	-3.25242	4/17	6616,6804,8499,8541	SNAP25,STX1A,PPFIA2,PPFIA3
5_Member	GO Biological Processes	GO:0051588	regulation of neurotransmitter transport	-5.03264	-3.22762	8/128	801,808,5582,6623,6804,8499,9900,112755	CALM1,CALM3,PRKCG,SNCG,STX1A,PPFIA2,SV2A,STX1B
5_Member	Reactome Gene Sets	R-HSA-181429	Serotonin Neurotransmitter Release Cycle	-4.95224	-3.16388	4/18	6616,6804,8499,8541	SNAP25,STX1A,PPFIA2,PPFIA3
5_Member	Reactome Gene Sets	R-HSA-181430	Norepinephrine Neurotransmitter Release Cycle	-4.95224	-3.16388	4/18	6616,6804,8499,8541	SNAP25,STX1A,PPFIA2,PPFIA3
5_Member	KEGG Pathway	ko04721	Synaptic vesicle cycle	-4.94424	-3.15937	6/63	534,1211,1212,6616,6804,112755	ATP6V1G2,CLTA,CLTB,SNAP25,STX1A,STX1B
5_Member	GO Biological Processes	GO:2000300	regulation of synaptic vesicle exocytosis	-4.8267	-3.06439	6/66	801,808,5582,6804,8499,112755	CALM1,CALM3,PRKCG,STX1A,PPFIA2,STX1B
5_Member	GO Biological Processes	GO:1902803	regulation of synaptic vesicle transport	-4.6086	-2.90291	6/72	801,808,5582,6804,8499,112755	CALM1,CALM3,PRKCG,STX1A,PPFIA2,STX1B
5_Member	Reactome Gene Sets	R-HSA-212676	Dopamine Neurotransmitter Release Cycle	-4.50441	-2.83214	4/23	6616,6804,8499,8541	SNAP25,STX1A,PPFIA2,PPFIA3
5_Member	Reactome Gene Sets	R-HSA-210500	Glutamate Neurotransmitter Release Cycle	-4.42796	-2.78254	4/24	6616,6804,8499,8541	SNAP25,STX1A,PPFIA2,PPFIA3
5_Member	KEGG Pathway	hsa04721	Synaptic vesicle cycle	-4.3786	-2.73902	6/79	534,1211,1212,6616,6804,112755	ATP6V1G2,CLTA,CLTB,SNAP25,STX1A,STX1B
5_Member	Reactome Gene Sets	R-HSA-112310	Neurotransmitter release cycle	-4.26371	-2.65066	5/51	6616,6804,8499,8541,80331	SNAP25,STX1A,PPFIA2,PPFIA3,DNAJC5
5_Member	WikiPathways	WP2267	Synaptic Vesicle Pathway	-4.26371	-2.65066	5/51	291,1211,6616,6804,112755	SLC25A4,CLTA,SNAP25,STX1A,STX1B
5_Member	GO Biological Processes	GO:0048488	synaptic vesicle endocytosis	-3.95762	-2.41296	5/59	801,808,5533,6623,6804	CALM1,CALM3,PPP3CC,SNCG,STX1A
5_Member	GO Biological Processes	GO:0140238	presynaptic endocytosis	-3.95762	-2.41296	5/59	801,808,5533,6623,6804	CALM1,CALM3,PPP3CC,SNCG,STX1A
5_Member	GO Biological Processes	GO:0031644	regulation of neurological system process	-3.91501	-2.38283	7/137	2185,4884,6714,6804,7143,9456,112755	PTK2B,NPTX1,SRC,STX1A,TNR,HOMER1,STX1B
5_Member	GO Biological Processes	GO:0017158	regulation of calcium ion-dependent exocytosis	-3.83076	-2.31757	6/99	801,808,5582,6804,8499,112755	CALM1,CALM3,PRKCG,STX1A,PPFIA2,STX1B
5_Member	GO Biological Processes	GO:0014047	glutamate secretion	-3.53695	-2.09027	4/40	6616,6804,8499,8541	SNAP25,STX1A,PPFIA2,PPFIA3
5_Member	GO Biological Processes	GO:0006904	vesicle docking involved in exocytosis	-3.37596	-1.96498	4/44	6616,6804,8541,112755	SNAP25,STX1A,PPFIA3,STX1B
5_Member	Reactome Gene Sets	R-HSA-888590	GABA synthesis, release, reuptake and degradation	-3.35168	-1.94557	3/19	6616,6804,80331	SNAP25,STX1A,DNAJC5
5_Member	GO Biological Processes	GO:0031629	synaptic vesicle fusion to presynaptic active zone membrane	-3.21928	-1.83901	3/21	6616,6804,112755	SNAP25,STX1A,STX1B
5_Member	GO Biological Processes	GO:0099500	vesicle fusion to plasma membrane	-3.21928	-1.83901	3/21	6616,6804,112755	SNAP25,STX1A,STX1B
5_Member	GO Biological Processes	GO:0022406	membrane docking	-3.17995	-1.80557	7/181	1778,6616,6804,7430,8541,22919,112755	DYNC1H1,SNAP25,STX1A,EZR,PPFIA3,MAPRE1,STX1B
5_Member	GO Biological Processes	GO:0006835	dicarboxylic acid transport	-3.01585	-1.66597	5/94	6616,6804,8402,8499,8541	SNAP25,STX1A,SLC25A11,PPFIA2,PPFIA3
5_Member	WikiPathways	WP4932	7q11.23 copy number variation syndrome	-2.97474	-1.63328	5/96	513,6616,6804,23451,64756	ATP5F1D,SNAP25,STX1A,SF3B1,ATPAF1
5_Member	GO Biological Processes	GO:0031646	positive regulation of neurological system process	-2.91896	-1.58577	4/58	2185,6804,7143,112755	PTK2B,STX1A,TNR,STX1B
5_Member	GO Biological Processes	GO:1903305	regulation of regulated secretory pathway	-2.90099	-1.57106	6/148	801,808,5582,6804,8499,112755	CALM1,CALM3,PRKCG,STX1A,PPFIA2,STX1B
5_Member	GO Biological Processes	GO:2000463	positive regulation of excitatory postsynaptic potential	-2.89235	-1.56405	3/27	2185,6804,112755	PTK2B,STX1A,STX1B
5_Member	GO Biological Processes	GO:0017157	regulation of exocytosis	-2.82899	-1.51108	7/208	801,808,5582,6804,7447,8499,112755	CALM1,CALM3,PRKCG,STX1A,VSNL1,PPFIA2,STX1B
5_Member	GO Biological Processes	GO:0006865	amino acid transport	-2.79852	-1.4865	6/155	6520,6616,6804,8499,8541,9900	SLC3A2,SNAP25,STX1A,PPFIA2,PPFIA3,SV2A
5_Member	GO Biological Processes	GO:0048278	vesicle docking	-2.73489	-1.43706	4/65	6616,6804,8541,112755	SNAP25,STX1A,PPFIA3,STX1B
5_Member	GO Biological Processes	GO:0015800	acidic amino acid transport	-2.6864	-1.39679	4/67	6616,6804,8499,8541	SNAP25,STX1A,PPFIA2,PPFIA3
5_Member	GO Biological Processes	GO:0015711	organic anion transport	-2.57241	-1.30445	11/506	291,293,358,6520,6616,6804,8402,8499,8541,9900,25874	SLC25A4,SLC25A6,AQP1,SLC3A2,SNAP25,STX1A,SLC25A11,PPFIA2,PPFIA3,SV2A,MPC2
5_Member	GO Biological Processes	GO:0140056	organelle localization by membrane tethering	-2.57155	-1.30431	6/172	1778,6616,6804,8541,22919,112755	DYNC1H1,SNAP25,STX1A,PPFIA3,MAPRE1,STX1B
5_Member	GO Biological Processes	GO:0046717	acid secretion	-2.54783	-1.28618	5/120	6616,6804,8499,8541,9900	SNAP25,STX1A,PPFIA2,PPFIA3,SV2A
5_Member	GO Biological Processes	GO:0098815	modulation of excitatory postsynaptic potential	-2.27976	-1.06073	3/44	2185,6804,112755	PTK2B,STX1A,STX1B
5_Member	GO Biological Processes	GO:0048284	organelle fusion	-2.18756	-0.982165	5/146	2023,6616,6804,54927,112755	ENO1,SNAP25,STX1A,CHCHD3,STX1B
5_Member	GO Biological Processes	GO:0006820	anion transport	-2.16418	-0.961213	12/656	291,293,358,5250,6520,6616,6804,8402,8499,8541,9900,25874	SLC25A4,SLC25A6,AQP1,SLC25A3,SLC3A2,SNAP25,STX1A,SLC25A11,PPFIA2,PPFIA3,SV2A,MPC2
5_Member	GO Biological Processes	GO:0046942	carboxylic acid transport	-2.11454	-0.922357	8/352	6520,6616,6804,8402,8499,8541,9900,25874	SLC3A2,SNAP25,STX1A,SLC25A11,PPFIA2,PPFIA3,SV2A,MPC2
5_Member	GO Biological Processes	GO:0015849	organic acid transport	-2.10749	-0.916494	8/353	6520,6616,6804,8402,8499,8541,9900,25874	SLC3A2,SNAP25,STX1A,SLC25A11,PPFIA2,PPFIA3,SV2A,MPC2
5_Member	GO Biological Processes	GO:0060079	excitatory postsynaptic potential	-2.06605	-0.881785	4/100	2185,6804,7442,112755	PTK2B,STX1A,TRPV1,STX1B
5_Member	GO Biological Processes	GO:0050806	positive regulation of synaptic transmission	-2.04692	-0.866705	5/158	2185,6616,6804,7143,112755	PTK2B,SNAP25,STX1A,TNR,STX1B
6_Summary	GO Biological Processes	GO:0034332	adherens junction organization	-10.6983	-7.32946	14/150	88,102,1012,2039,2185,4035,5879,6714,7070,8826,9647,23499,23705,57863,5339,7402,3696,8499,9693,7450,358,781,822,1465,2317,4637,5066,5217,7171,7430,23406,29085,55740,1778,4137,10763,22919,1278,2670,7411,7143,637,1854,3146,6804,112755,6647,5533,54732,54832,80349,7857,3371,5361,375790	ACTN2,ADAM10,CDH13,DMTN,PTK2B,LRP1,RAC1,SRC,THY1,IQGAP1,PPM1F,MACF1,CADM1,CADM3,PLEC,UTRN,ITGB8,PPFIA2,RAPGEF2,VWF,AQP1,CACNA2D1,CAPG,CSRP1,FLNB,MYL6,PAM,PFN2,TPM4,EZR,COTL1,PHPT1,ENAH,DYNC1H1,MAPT,NES,MAPRE1,COL1A2,GFAP,VBP1,TNR,BID,DUT,HMGB1,STX1A,STX1B,SOD1,PPP3CC,TMED9,VPS13C,WDR61,SCG2,TNC,PLXNA1,AGRN
6_Member	GO Biological Processes	GO:0034332	adherens junction organization	-10.6983	-7.32946	14/150	88,102,1012,2039,2185,4035,5879,6714,7070,8826,9647,23499,23705,57863	ACTN2,ADAM10,CDH13,DMTN,PTK2B,LRP1,RAC1,SRC,THY1,IQGAP1,PPM1F,MACF1,CADM1,CADM3
6_Member	GO Biological Processes	GO:0007044	cell-substrate junction assembly	-9.29357	-6.38182	11/100	88,2039,2185,4035,5339,5879,6714,7070,8826,9647,23499	ACTN2,DMTN,PTK2B,LRP1,PLEC,RAC1,SRC,THY1,IQGAP1,PPM1F,MACF1
6_Member	GO Biological Processes	GO:0007045	cell-substrate adherens junction assembly	-8.78926	-6.04313	10/85	88,2039,2185,4035,5879,6714,7070,8826,9647,23499	ACTN2,DMTN,PTK2B,LRP1,RAC1,SRC,THY1,IQGAP1,PPM1F,MACF1
6_Member	GO Biological Processes	GO:0048041	focal adhesion assembly	-8.78926	-6.04313	10/85	88,2039,2185,4035,5879,6714,7070,8826,9647,23499	ACTN2,DMTN,PTK2B,LRP1,RAC1,SRC,THY1,IQGAP1,PPM1F,MACF1
6_Member	GO Biological Processes	GO:0034333	adherens junction assembly	-8.26562	-5.71461	10/96	88,2039,2185,4035,5879,6714,7070,8826,9647,23499	ACTN2,DMTN,PTK2B,LRP1,RAC1,SRC,THY1,IQGAP1,PPM1F,MACF1
6_Member	GO Biological Processes	GO:0001952	regulation of cell-matrix adhesion	-8.2524	-5.71304	11/125	1012,2039,2185,4035,5879,6714,7070,7402,8826,9647,23499	CDH13,DMTN,PTK2B,LRP1,RAC1,SRC,THY1,UTRN,IQGAP1,PPM1F,MACF1
6_Member	GO Biological Processes	GO:0007160	cell-matrix adhesion	-8.22302	-5.69663	14/231	88,1012,2039,2185,3696,4035,5879,6714,7070,7402,8499,8826,9647,23499	ACTN2,CDH13,DMTN,PTK2B,ITGB8,LRP1,RAC1,SRC,THY1,UTRN,PPFIA2,IQGAP1,PPM1F,MACF1
6_Member	GO Biological Processes	GO:0034330	cell junction organization	-8.17735	-5.65729	16/317	88,102,1012,2039,2185,4035,5339,5879,6714,7070,8826,9647,9693,23499,23705,57863	ACTN2,ADAM10,CDH13,DMTN,PTK2B,LRP1,PLEC,RAC1,SRC,THY1,IQGAP1,PPM1F,RAPGEF2,MACF1,CADM1,CADM3
6_Member	GO Biological Processes	GO:0051893	regulation of focal adhesion assembly	-7.35158	-5.01798	8/64	2039,4035,5879,6714,7070,8826,9647,23499	DMTN,LRP1,RAC1,SRC,THY1,IQGAP1,PPM1F,MACF1
6_Member	GO Biological Processes	GO:0090109	regulation of cell-substrate junction assembly	-7.35158	-5.01798	8/64	2039,4035,5879,6714,7070,8826,9647,23499	DMTN,LRP1,RAC1,SRC,THY1,IQGAP1,PPM1F,MACF1
6_Member	GO Biological Processes	GO:1903391	regulation of adherens junction organization	-6.94337	-4.68917	8/72	2039,4035,5879,6714,7070,8826,9647,23499	DMTN,LRP1,RAC1,SRC,THY1,IQGAP1,PPM1F,MACF1
6_Member	GO Biological Processes	GO:1901888	regulation of cell junction assembly	-6.93749	-4.68917	9/100	2039,4035,5879,6714,7070,8826,9647,9693,23499	DMTN,LRP1,RAC1,SRC,THY1,IQGAP1,PPM1F,RAPGEF2,MACF1
6_Member	GO Biological Processes	GO:0031589	cell-substrate adhesion	-6.61471	-4.44486	15/360	88,1012,2039,2185,3696,4035,5879,6714,7070,7402,7450,8499,8826,9647,23499	ACTN2,CDH13,DMTN,PTK2B,ITGB8,LRP1,RAC1,SRC,THY1,UTRN,VWF,PPFIA2,IQGAP1,PPM1F,MACF1
6_Member	GO Biological Processes	GO:0001954	positive regulation of cell-matrix adhesion	-6.61027	-4.44449	7/54	1012,2185,5879,7070,7402,8826,9647	CDH13,PTK2B,RAC1,THY1,UTRN,IQGAP1,PPM1F
6_Member	GO Biological Processes	GO:0034329	cell junction assembly	-5.87757	-3.85512	12/259	88,2039,2185,4035,5339,5879,6714,7070,8826,9647,9693,23499	ACTN2,DMTN,PTK2B,LRP1,PLEC,RAC1,SRC,THY1,IQGAP1,PPM1F,RAPGEF2,MACF1
6_Member	GO Biological Processes	GO:0010810	regulation of cell-substrate adhesion	-5.79186	-3.77931	11/218	1012,2039,2185,4035,5879,6714,7070,7402,8826,9647,23499	CDH13,DMTN,PTK2B,LRP1,RAC1,SRC,THY1,UTRN,IQGAP1,PPM1F,MACF1
6_Member	GO Biological Processes	GO:0030029	actin filament-based process	-5.77248	-3.76383	21/789	88,358,781,822,1465,2039,2185,2317,4035,4637,5066,5217,5879,6714,7171,7430,8826,9647,23406,29085,55740	ACTN2,AQP1,CACNA2D1,CAPG,CSRP1,DMTN,PTK2B,FLNB,LRP1,MYL6,PAM,PFN2,RAC1,SRC,TPM4,EZR,IQGAP1,PPM1F,COTL1,PHPT1,ENAH
6_Member	GO Biological Processes	GO:0051493	regulation of cytoskeleton organization	-5.68057	-3.69458	17/544	88,822,1778,2039,2185,4035,4137,5066,5217,5879,7430,8826,9647,10763,22919,23406,29085	ACTN2,CAPG,DYNC1H1,DMTN,PTK2B,LRP1,MAPT,PAM,PFN2,RAC1,EZR,IQGAP1,PPM1F,NES,MAPRE1,COTL1,PHPT1
6_Member	GO Biological Processes	GO:0030036	actin cytoskeleton organization	-5.42658	-3.51172	19/696	88,358,822,1465,2039,2185,2317,4035,5066,5217,5879,6714,7171,7430,8826,9647,23406,29085,55740	ACTN2,AQP1,CAPG,CSRP1,DMTN,PTK2B,FLNB,LRP1,PAM,PFN2,RAC1,SRC,TPM4,EZR,IQGAP1,PPM1F,COTL1,PHPT1,ENAH
6_Member	GO Biological Processes	GO:0097435	supramolecular fiber organization	-5.27683	-3.40365	19/713	88,822,1278,1465,1778,2039,2185,2670,4137,5217,5879,6714,7171,7411,7430,9647,22919,23406,55740	ACTN2,CAPG,COL1A2,CSRP1,DYNC1H1,DMTN,PTK2B,GFAP,MAPT,PFN2,RAC1,SRC,TPM4,VBP1,EZR,PPM1F,MAPRE1,COTL1,ENAH
6_Member	GO Biological Processes	GO:0032956	regulation of actin cytoskeleton organization	-5.22005	-3.35807	13/353	88,822,2039,2185,4035,5066,5217,5879,7430,8826,9647,23406,29085	ACTN2,CAPG,DMTN,PTK2B,LRP1,PAM,PFN2,RAC1,EZR,IQGAP1,PPM1F,COTL1,PHPT1
6_Member	GO Biological Processes	GO:0010811	positive regulation of cell-substrate adhesion	-5.21299	-3.3524	8/121	1012,2039,2185,5879,7070,7402,8826,9647	CDH13,DMTN,PTK2B,RAC1,THY1,UTRN,IQGAP1,PPM1F
6_Member	GO Biological Processes	GO:0032535	regulation of cellular component size	-5.00167	-3.20506	13/370	88,358,822,2039,2185,4035,4137,5217,5879,7143,7430,23406,23499	ACTN2,AQP1,CAPG,DMTN,PTK2B,LRP1,MAPT,PFN2,RAC1,TNR,EZR,COTL1,MACF1
6_Member	GO Biological Processes	GO:0043254	regulation of protein complex assembly	-4.94779	-3.1606	15/492	637,822,1854,2039,2185,2670,3146,4137,5217,5879,6714,6804,22919,23406,112755	BID,CAPG,DUT,DMTN,PTK2B,GFAP,HMGB1,MAPT,PFN2,RAC1,SRC,STX1A,MAPRE1,COTL1,STX1B
6_Member	GO Biological Processes	GO:0032970	regulation of actin filament-based process	-4.70259	-2.969	13/395	88,822,2039,2185,4035,5066,5217,5879,7430,8826,9647,23406,29085	ACTN2,CAPG,DMTN,PTK2B,LRP1,PAM,PFN2,RAC1,EZR,IQGAP1,PPM1F,COTL1,PHPT1
6_Member	GO Biological Processes	GO:0051894	positive regulation of focal adhesion assembly	-4.35496	-2.71951	4/25	5879,7070,8826,9647	RAC1,THY1,IQGAP1,PPM1F
6_Member	GO Biological Processes	GO:0090066	regulation of anatomical structure size	-4.29982	-2.67572	14/495	88,358,822,2039,2185,4035,4137,5217,5879,6647,7143,7430,23406,23499	ACTN2,AQP1,CAPG,DMTN,PTK2B,LRP1,MAPT,PFN2,RAC1,SOD1,TNR,EZR,COTL1,MACF1
6_Member	GO Biological Processes	GO:0010638	positive regulation of organelle organization	-4.29323	-2.66993	16/628	88,637,822,1778,2185,4137,5217,5533,5879,6714,9647,10763,22919,54732,54832,80349	ACTN2,BID,CAPG,DYNC1H1,PTK2B,MAPT,PFN2,PPP3CC,RAC1,SRC,PPM1F,NES,MAPRE1,TMED9,VPS13C,WDR61
6_Member	GO Biological Processes	GO:0051495	positive regulation of cytoskeleton organization	-4.08076	-2.50504	9/223	88,1778,2185,4137,5217,5879,9647,10763,22919	ACTN2,DYNC1H1,PTK2B,MAPT,PFN2,RAC1,PPM1F,NES,MAPRE1
6_Member	GO Biological Processes	GO:1903393	positive regulation of adherens junction organization	-3.92029	-2.38746	4/32	5879,7070,8826,9647	RAC1,THY1,IQGAP1,PPM1F
6_Member	GO Biological Processes	GO:0040017	positive regulation of locomotion	-3.91212	-2.38058	15/607	102,1012,2039,2185,3146,4035,5879,6714,7070,7857,8826,9647,9693,22919,29085	ADAM10,CDH13,DMTN,PTK2B,HMGB1,LRP1,RAC1,SRC,THY1,SCG2,IQGAP1,PPM1F,RAPGEF2,MAPRE1,PHPT1
6_Member	GO Biological Processes	GO:0007162	negative regulation of cell adhesion	-3.8455	-2.3292	10/295	102,1012,2039,3146,3371,4035,5361,6714,7143,9647	ADAM10,CDH13,DMTN,HMGB1,TNC,LRP1,PLXNA1,SRC,TNR,PPM1F
6_Member	GO Biological Processes	GO:1902903	regulation of supramolecular fiber organization	-3.68741	-2.19891	11/369	88,822,2039,2185,4137,5217,5879,7411,9647,22919,23406	ACTN2,CAPG,DMTN,PTK2B,MAPT,PFN2,RAC1,VBP1,PPM1F,MAPRE1,COTL1
6_Member	GO Biological Processes	GO:0007015	actin filament organization	-3.65353	-2.17487	12/436	88,822,2039,2185,5217,5879,6714,7171,7430,9647,23406,55740	ACTN2,CAPG,DMTN,PTK2B,PFN2,RAC1,SRC,TPM4,EZR,PPM1F,COTL1,ENAH
6_Member	GO Biological Processes	GO:1901890	positive regulation of cell junction assembly	-3.62427	-2.15405	4/38	5879,7070,8826,9647	RAC1,THY1,IQGAP1,PPM1F
6_Member	GO Biological Processes	GO:0007229	integrin-mediated signaling pathway	-3.62421	-2.15405	6/108	102,2039,2185,3696,6714,7070	ADAM10,DMTN,PTK2B,ITGB8,SRC,THY1
6_Member	GO Biological Processes	GO:2000147	positive regulation of cell motility	-3.59043	-2.12639	14/579	102,1012,2039,2185,3146,4035,5879,6714,7070,8826,9647,9693,22919,29085	ADAM10,CDH13,DMTN,PTK2B,HMGB1,LRP1,RAC1,SRC,THY1,IQGAP1,PPM1F,RAPGEF2,MAPRE1,PHPT1
6_Member	GO Biological Processes	GO:0051017	actin filament bundle assembly	-3.56729	-2.11364	7/156	2039,2185,5217,5879,6714,7430,9647	DMTN,PTK2B,PFN2,RAC1,SRC,EZR,PPM1F
6_Member	GO Biological Processes	GO:0061572	actin filament bundle organization	-3.50049	-2.0621	7/160	2039,2185,5217,5879,6714,7430,9647	DMTN,PTK2B,PFN2,RAC1,SRC,EZR,PPM1F
6_Member	GO Biological Processes	GO:0051272	positive regulation of cellular component movement	-3.45687	-2.02943	14/597	102,1012,2039,2185,3146,4035,5879,6714,7070,8826,9647,9693,22919,29085	ADAM10,CDH13,DMTN,PTK2B,HMGB1,LRP1,RAC1,SRC,THY1,IQGAP1,PPM1F,RAPGEF2,MAPRE1,PHPT1
6_Member	GO Biological Processes	GO:0008154	actin polymerization or depolymerization	-3.44843	-2.02352	8/215	88,822,2039,2185,5217,5879,23406,55740	ACTN2,CAPG,DMTN,PTK2B,PFN2,RAC1,COTL1,ENAH
6_Member	GO Biological Processes	GO:0032271	regulation of protein polymerization	-3.31737	-1.91511	8/225	822,2039,2185,4137,5217,5879,22919,23406	CAPG,DMTN,PTK2B,MAPT,PFN2,RAC1,MAPRE1,COTL1
6_Member	GO Biological Processes	GO:0008361	regulation of cell size	-3.28156	-1.88833	7/174	358,4035,4137,5879,7143,7430,23499	AQP1,LRP1,MAPT,RAC1,TNR,EZR,MACF1
6_Member	GO Biological Processes	GO:0030335	positive regulation of cell migration	-3.24267	-1.85551	13/555	102,1012,2039,2185,3146,4035,5879,6714,7070,8826,9647,9693,22919	ADAM10,CDH13,DMTN,PTK2B,HMGB1,LRP1,RAC1,SRC,THY1,IQGAP1,PPM1F,RAPGEF2,MAPRE1
6_Member	GO Biological Processes	GO:0044089	positive regulation of cellular component biogenesis	-3.22819	-1.84518	13/557	637,822,1778,2185,4137,5217,5879,6714,7070,8826,9647,22919,375790	BID,CAPG,DYNC1H1,PTK2B,MAPT,PFN2,RAC1,SRC,THY1,IQGAP1,PPM1F,MAPRE1,AGRN
6_Member	GO Biological Processes	GO:0031032	actomyosin structure organization	-3.01647	-1.66617	7/193	88,1465,2185,5217,5879,6714,9647	ACTN2,CSRP1,PTK2B,PFN2,RAC1,SRC,PPM1F
6_Member	GO Biological Processes	GO:1902905	positive regulation of supramolecular fiber organization	-2.88956	-1.56247	7/203	88,2185,4137,5217,5879,9647,22919	ACTN2,PTK2B,MAPT,PFN2,RAC1,PPM1F,MAPRE1
6_Member	GO Biological Processes	GO:0030038	contractile actin filament bundle assembly	-2.7831	-1.4738	5/106	2185,5217,5879,6714,9647	PTK2B,PFN2,RAC1,SRC,PPM1F
6_Member	GO Biological Processes	GO:0043149	stress fiber assembly	-2.7831	-1.4738	5/106	2185,5217,5879,6714,9647	PTK2B,PFN2,RAC1,SRC,PPM1F
6_Member	GO Biological Processes	GO:0110053	regulation of actin filament organization	-2.7769	-1.46838	8/273	88,822,2039,2185,5217,5879,9647,23406	ACTN2,CAPG,DMTN,PTK2B,PFN2,RAC1,PPM1F,COTL1
6_Member	GO Biological Processes	GO:0031334	positive regulation of protein complex assembly	-2.65132	-1.36978	8/286	637,822,2185,4137,5217,5879,6714,22919	BID,CAPG,PTK2B,MAPT,PFN2,RAC1,SRC,MAPRE1
6_Member	GO Biological Processes	GO:0010631	epithelial cell migration	-2.60432	-1.32927	9/358	1012,2185,3146,5217,5879,6714,7857,9647,23499	CDH13,PTK2B,HMGB1,PFN2,RAC1,SRC,SCG2,PPM1F,MACF1
6_Member	GO Biological Processes	GO:0090132	epithelium migration	-2.5802	-1.3112	9/361	1012,2185,3146,5217,5879,6714,7857,9647,23499	CDH13,PTK2B,HMGB1,PFN2,RAC1,SRC,SCG2,PPM1F,MACF1
6_Member	GO Biological Processes	GO:0051258	protein polymerization	-2.56871	-1.30182	8/295	822,2039,2185,4137,5217,5879,22919,23406	CAPG,DMTN,PTK2B,MAPT,PFN2,RAC1,MAPRE1,COTL1
6_Member	GO Biological Processes	GO:0090130	tissue migration	-2.5406	-1.28033	9/366	1012,2185,3146,5217,5879,6714,7857,9647,23499	CDH13,PTK2B,HMGB1,PFN2,RAC1,SRC,SCG2,PPM1F,MACF1
6_Member	GO Biological Processes	GO:0008064	regulation of actin polymerization or depolymerization	-2.41595	-1.17432	6/185	88,822,2039,2185,5217,23406	ACTN2,CAPG,DMTN,PTK2B,PFN2,COTL1
6_Member	GO Biological Processes	GO:0030832	regulation of actin filament length	-2.40455	-1.16457	6/186	88,822,2039,2185,5217,23406	ACTN2,CAPG,DMTN,PTK2B,PFN2,COTL1
6_Member	GO Biological Processes	GO:0030041	actin filament polymerization	-2.38199	-1.14628	6/188	822,2039,2185,5217,5879,23406	CAPG,DMTN,PTK2B,PFN2,RAC1,COTL1
6_Member	GO Biological Processes	GO:0032273	positive regulation of protein polymerization	-2.37086	-1.13711	5/132	2185,4137,5217,5879,22919	PTK2B,MAPT,PFN2,RAC1,MAPRE1
6_Member	GO Biological Processes	GO:0001667	ameboidal-type cell migration	-2.2944	-1.07254	10/474	1012,2039,2185,3146,5217,5879,6714,7857,9647,23499	CDH13,DMTN,PTK2B,HMGB1,PFN2,RAC1,SRC,SCG2,PPM1F,MACF1
6_Member	GO Biological Processes	GO:0010632	regulation of epithelial cell migration	-2.01212	-0.838188	7/294	2185,3146,5217,5879,6714,9647,23499	PTK2B,HMGB1,PFN2,RAC1,SRC,PPM1F,MACF1
7_Summary	GO Biological Processes	GO:0072657	protein localization to membrane	-10.6113	-7.31714	26/658	88,102,637,801,808,1804,2039,2817,4035,5533,6133,6233,6616,6726,6804,7070,7311,7430,8546,8943,9693,23499,26003,27342,112755,375790,293,4137,7314,7316,8239,10204,10469,54832,57506,4924	ACTN2,ADAM10,BID,CALM1,CALM3,DPP6,DMTN,GPC1,LRP1,PPP3CC,RPL9,RPS27A,SNAP25,SRP9,STX1A,THY1,UBA52,EZR,AP3B1,AP3D1,RAPGEF2,MACF1,GORASP2,RABGEF1,STX1B,AGRN,SLC25A6,MAPT,UBB,UBC,USP9X,NUTF2,TIMM44,VPS13C,MAVS,NUCB1
7_Member	GO Biological Processes	GO:0072657	protein localization to membrane	-10.6113	-7.31714	26/658	88,102,637,801,808,1804,2039,2817,4035,5533,6133,6233,6616,6726,6804,7070,7311,7430,8546,8943,9693,23499,26003,27342,112755,375790	ACTN2,ADAM10,BID,CALM1,CALM3,DPP6,DMTN,GPC1,LRP1,PPP3CC,RPL9,RPS27A,SNAP25,SRP9,STX1A,THY1,UBA52,EZR,AP3B1,AP3D1,RAPGEF2,MACF1,GORASP2,RABGEF1,STX1B,AGRN
7_Member	GO Biological Processes	GO:0072594	establishment of protein localization to organelle	-6.86738	-4.65105	19/557	293,637,801,808,4137,5533,6133,6233,6726,7311,7314,7316,8239,8546,8943,10204,10469,54832,57506	SLC25A6,BID,CALM1,CALM3,MAPT,PPP3CC,RPL9,RPS27A,SRP9,UBA52,UBB,UBC,USP9X,AP3B1,AP3D1,NUTF2,TIMM44,VPS13C,MAVS
7_Member	GO Biological Processes	GO:0090150	establishment of protein localization to membrane	-6.67675	-4.48108	15/356	637,801,808,2039,5533,6133,6233,6616,6726,7311,8546,23499,26003,27342,112755	BID,CALM1,CALM3,DMTN,PPP3CC,RPL9,RPS27A,SNAP25,SRP9,UBA52,AP3B1,MACF1,GORASP2,RABGEF1,STX1B
7_Member	GO Biological Processes	GO:0006605	protein targeting	-6.20152	-4.10269	16/442	293,637,2039,4924,6133,6233,6726,7311,7314,7316,8239,8546,8943,10469,27342,54832	SLC25A6,BID,DMTN,NUCB1,RPL9,RPS27A,SRP9,UBA52,UBB,UBC,USP9X,AP3B1,AP3D1,TIMM44,RABGEF1,VPS13C
8_Summary	GO Biological Processes	GO:0009123	nucleoside monophosphate metabolic process	-10.2586	-7.06282	20/388	203,318,353,513,521,637,1329,1854,2023,4724,5208,5224,7381,9551,10591,10632,29796,30833,64077,201626,954,4860,5138,23498,23729,25874,291,293,801,1528,3146,56898,534,808,5533,8546,54927,805,10469,1778,22919,84617,84790,39,10994,2185,51084,176,2817,4969,375790,5250	AK1,NUDT2,APRT,ATP5F1D,ATP5ME,BID,COX5B,DUT,ENO1,NDUFS4,PFKFB2,PGAM2,UQCRB,ATP5MF,DNPH1,ATP5MG,UQCR10,NT5C,LHPP,PDE12,ENTPD2,PNP,PDE2A,HAAO,SHPK,MPC2,SLC25A4,SLC25A6,CALM1,CYB5A,HMGB1,BDH2,ATP6V1G2,CALM3,PPP3CC,AP3B1,CHCHD3,CALM2,TIMM44,DYNC1H1,MAPRE1,TUBB6,TUBA1C,ACAT2,ILVBL,PTK2B,CRYL1,ACAN,GPC1,OGN,AGRN,SLC25A3
8_Member	GO Biological Processes	GO:0009123	nucleoside monophosphate metabolic process	-10.2586	-7.06282	20/388	203,318,353,513,521,637,1329,1854,2023,4724,5208,5224,7381,9551,10591,10632,29796,30833,64077,201626	AK1,NUDT2,APRT,ATP5F1D,ATP5ME,BID,COX5B,DUT,ENO1,NDUFS4,PFKFB2,PGAM2,UQCRB,ATP5MF,DNPH1,ATP5MG,UQCR10,NT5C,LHPP,PDE12
8_Member	GO Biological Processes	GO:0006753	nucleoside phosphate metabolic process	-9.57103	-6.6277	26/735	203,318,353,513,521,637,954,1329,1854,2023,4724,4860,5138,5208,5224,7381,9551,10591,10632,23498,23729,25874,29796,30833,64077,201626	AK1,NUDT2,APRT,ATP5F1D,ATP5ME,BID,ENTPD2,COX5B,DUT,ENO1,NDUFS4,PNP,PDE2A,PFKFB2,PGAM2,UQCRB,ATP5MF,DNPH1,ATP5MG,HAAO,SHPK,MPC2,UQCR10,NT5C,LHPP,PDE12
8_Member	GO Biological Processes	GO:0009167	purine ribonucleoside monophosphate metabolic process	-9.16669	-6.28491	18/355	203,318,353,513,521,637,1329,2023,4724,5208,5224,7381,9551,10632,29796,30833,64077,201626	AK1,NUDT2,APRT,ATP5F1D,ATP5ME,BID,COX5B,ENO1,NDUFS4,PFKFB2,PGAM2,UQCRB,ATP5MF,ATP5MG,UQCR10,NT5C,LHPP,PDE12
8_Member	GO Biological Processes	GO:0009126	purine nucleoside monophosphate metabolic process	-9.1278	-6.26025	18/357	203,318,353,513,521,637,1329,2023,4724,5208,5224,7381,9551,10632,29796,30833,64077,201626	AK1,NUDT2,APRT,ATP5F1D,ATP5ME,BID,COX5B,ENO1,NDUFS4,PFKFB2,PGAM2,UQCRB,ATP5MF,ATP5MG,UQCR10,NT5C,LHPP,PDE12
8_Member	GO Biological Processes	GO:0009161	ribonucleoside monophosphate metabolic process	-8.86257	-6.08344	18/371	203,318,353,513,521,637,1329,2023,4724,5208,5224,7381,9551,10632,29796,30833,64077,201626	AK1,NUDT2,APRT,ATP5F1D,ATP5ME,BID,COX5B,ENO1,NDUFS4,PFKFB2,PGAM2,UQCRB,ATP5MF,ATP5MG,UQCR10,NT5C,LHPP,PDE12
8_Member	GO Biological Processes	GO:0009117	nucleotide metabolic process	-8.29005	-5.71647	24/726	203,318,353,513,521,637,1329,1854,2023,4724,4860,5138,5208,5224,7381,9551,10591,10632,23498,23729,25874,29796,30833,201626	AK1,NUDT2,APRT,ATP5F1D,ATP5ME,BID,COX5B,DUT,ENO1,NDUFS4,PNP,PDE2A,PFKFB2,PGAM2,UQCRB,ATP5MF,DNPH1,ATP5MG,HAAO,SHPK,MPC2,UQCR10,NT5C,PDE12
8_Member	WikiPathways	WP111	Electron Transport Chain (OXPHOS system in mitochondria)	-7.96632	-5.49391	10/103	291,293,513,521,1329,4724,7381,9551,10632,29796	SLC25A4,SLC25A6,ATP5F1D,ATP5ME,COX5B,NDUFS4,UQCRB,ATP5MF,ATP5MG,UQCR10
8_Member	GO Biological Processes	GO:0006163	purine nucleotide metabolic process	-7.80539	-5.37076	21/594	203,318,353,513,521,637,1329,2023,4724,4860,5138,5208,5224,7381,9551,10591,10632,25874,29796,30833,201626	AK1,NUDT2,APRT,ATP5F1D,ATP5ME,BID,COX5B,ENO1,NDUFS4,PNP,PDE2A,PFKFB2,PGAM2,UQCRB,ATP5MF,DNPH1,ATP5MG,MPC2,UQCR10,NT5C,PDE12
8_Member	GO Biological Processes	GO:0006091	generation of precursor metabolites and energy	-7.43709	-5.07818	19/512	291,513,521,637,801,1329,1528,2023,3146,4724,5208,5224,7381,9551,10632,23498,29796,56898,201626	SLC25A4,ATP5F1D,ATP5ME,BID,CALM1,COX5B,CYB5A,ENO1,HMGB1,NDUFS4,PFKFB2,PGAM2,UQCRB,ATP5MF,ATP5MG,HAAO,UQCR10,BDH2,PDE12
8_Member	GO Biological Processes	GO:0046034	ATP metabolic process	-7.40218	-5.05187	15/313	203,318,513,521,637,1329,2023,4724,5208,5224,7381,9551,10632,29796,201626	AK1,NUDT2,ATP5F1D,ATP5ME,BID,COX5B,ENO1,NDUFS4,PFKFB2,PGAM2,UQCRB,ATP5MF,ATP5MG,UQCR10,PDE12
8_Member	GO Biological Processes	GO:0072521	purine-containing compound metabolic process	-7.39288	-5.05101	21/628	203,318,353,513,521,637,1329,2023,4724,4860,5138,5208,5224,7381,9551,10591,10632,25874,29796,30833,201626	AK1,NUDT2,APRT,ATP5F1D,ATP5ME,BID,COX5B,ENO1,NDUFS4,PNP,PDE2A,PFKFB2,PGAM2,UQCRB,ATP5MF,DNPH1,ATP5MG,MPC2,UQCR10,NT5C,PDE12
8_Member	GO Biological Processes	GO:0009141	nucleoside triphosphate metabolic process	-7.27301	-4.94349	16/368	203,318,513,521,637,1329,1854,2023,4724,5208,5224,7381,9551,10632,29796,201626	AK1,NUDT2,ATP5F1D,ATP5ME,BID,COX5B,DUT,ENO1,NDUFS4,PFKFB2,PGAM2,UQCRB,ATP5MF,ATP5MG,UQCR10,PDE12
8_Member	GO Biological Processes	GO:0019693	ribose phosphate metabolic process	-7.11157	-4.80574	20/594	203,318,353,513,521,637,1329,2023,4724,5138,5208,5224,7381,9551,10632,23729,25874,29796,30833,201626	AK1,NUDT2,APRT,ATP5F1D,ATP5ME,BID,COX5B,ENO1,NDUFS4,PDE2A,PFKFB2,PGAM2,UQCRB,ATP5MF,ATP5MG,SHPK,MPC2,UQCR10,NT5C,PDE12
8_Member	KEGG Pathway	ko00190	Oxidative phosphorylation	-6.90147	-4.66498	10/133	513,521,534,1329,4724,7381,9551,10632,29796,64077	ATP5F1D,ATP5ME,ATP6V1G2,COX5B,NDUFS4,UQCRB,ATP5MF,ATP5MG,UQCR10,LHPP
8_Member	GO Biological Processes	GO:0009124	nucleoside monophosphate biosynthetic process	-6.89355	-4.66498	12/208	203,318,353,513,521,1854,2023,5208,5224,9551,10632,64077	AK1,NUDT2,APRT,ATP5F1D,ATP5ME,DUT,ENO1,PFKFB2,PGAM2,ATP5MF,ATP5MG,LHPP
8_Member	GO Biological Processes	GO:0009205	purine ribonucleoside triphosphate metabolic process	-6.88439	-4.65903	15/343	203,318,513,521,637,1329,2023,4724,5208,5224,7381,9551,10632,29796,201626	AK1,NUDT2,ATP5F1D,ATP5ME,BID,COX5B,ENO1,NDUFS4,PFKFB2,PGAM2,UQCRB,ATP5MF,ATP5MG,UQCR10,PDE12
8_Member	GO Biological Processes	GO:0009150	purine ribonucleotide metabolic process	-6.85539	-4.6457	19/558	203,318,353,513,521,637,1329,2023,4724,5138,5208,5224,7381,9551,10632,25874,29796,30833,201626	AK1,NUDT2,APRT,ATP5F1D,ATP5ME,BID,COX5B,ENO1,NDUFS4,PDE2A,PFKFB2,PGAM2,UQCRB,ATP5MF,ATP5MG,MPC2,UQCR10,NT5C,PDE12
8_Member	GO Biological Processes	GO:0009144	purine nucleoside triphosphate metabolic process	-6.78739	-4.58382	15/349	203,318,513,521,637,1329,2023,4724,5208,5224,7381,9551,10632,29796,201626	AK1,NUDT2,ATP5F1D,ATP5ME,BID,COX5B,ENO1,NDUFS4,PFKFB2,PGAM2,UQCRB,ATP5MF,ATP5MG,UQCR10,PDE12
8_Member	GO Biological Processes	GO:0009199	ribonucleoside triphosphate metabolic process	-6.77142	-4.57088	15/350	203,318,513,521,637,1329,2023,4724,5208,5224,7381,9551,10632,29796,201626	AK1,NUDT2,ATP5F1D,ATP5ME,BID,COX5B,ENO1,NDUFS4,PFKFB2,PGAM2,UQCRB,ATP5MF,ATP5MG,UQCR10,PDE12
8_Member	GO Biological Processes	GO:0009259	ribonucleotide metabolic process	-6.65565	-4.47283	19/575	203,318,353,513,521,637,1329,2023,4724,5138,5208,5224,7381,9551,10632,25874,29796,30833,201626	AK1,NUDT2,APRT,ATP5F1D,ATP5ME,BID,COX5B,ENO1,NDUFS4,PDE2A,PFKFB2,PGAM2,UQCRB,ATP5MF,ATP5MG,MPC2,UQCR10,NT5C,PDE12
8_Member	GO Biological Processes	GO:0007006	mitochondrial membrane organization	-6.57778	-4.41478	10/144	513,521,637,801,808,5533,8546,9551,10632,54927	ATP5F1D,ATP5ME,BID,CALM1,CALM3,PPP3CC,AP3B1,ATP5MF,ATP5MG,CHCHD3
8_Member	GO Biological Processes	GO:0006119	oxidative phosphorylation	-6.46702	-4.31763	10/148	513,521,637,1329,4724,7381,9551,10632,29796,201626	ATP5F1D,ATP5ME,BID,COX5B,NDUFS4,UQCRB,ATP5MF,ATP5MG,UQCR10,PDE12
8_Member	GO Biological Processes	GO:0009168	purine ribonucleoside monophosphate biosynthetic process	-6.4496	-4.30288	11/187	203,318,353,513,521,2023,5208,5224,9551,10632,64077	AK1,NUDT2,APRT,ATP5F1D,ATP5ME,ENO1,PFKFB2,PGAM2,ATP5MF,ATP5MG,LHPP
8_Member	GO Biological Processes	GO:0009127	purine nucleoside monophosphate biosynthetic process	-6.42644	-4.28238	11/188	203,318,353,513,521,2023,5208,5224,9551,10632,64077	AK1,NUDT2,APRT,ATP5F1D,ATP5ME,ENO1,PFKFB2,PGAM2,ATP5MF,ATP5MG,LHPP
8_Member	GO Biological Processes	GO:1901293	nucleoside phosphate biosynthetic process	-6.21693	-4.1157	15/387	203,318,353,513,521,1854,2023,4860,5208,5224,9551,10632,23498,25874,64077	AK1,NUDT2,APRT,ATP5F1D,ATP5ME,DUT,ENO1,PNP,PFKFB2,PGAM2,ATP5MF,ATP5MG,HAAO,MPC2,LHPP
8_Member	GO Biological Processes	GO:0009156	ribonucleoside monophosphate biosynthetic process	-6.15928	-4.06519	11/200	203,318,353,513,521,2023,5208,5224,9551,10632,64077	AK1,NUDT2,APRT,ATP5F1D,ATP5ME,ENO1,PFKFB2,PGAM2,ATP5MF,ATP5MG,LHPP
8_Member	Reactome Gene Sets	R-HSA-1592230	Mitochondrial biogenesis	-6.00511	-3.94506	8/95	513,521,801,805,808,9551,10632,54927	ATP5F1D,ATP5ME,CALM1,CALM2,CALM3,ATP5MF,ATP5MG,CHCHD3
8_Member	KEGG Pathway	hsa00190	Oxidative phosphorylation	-5.9841	-3.93269	10/167	513,521,534,1329,4724,7381,9551,10632,29796,64077	ATP5F1D,ATP5ME,ATP6V1G2,COX5B,NDUFS4,UQCRB,ATP5MF,ATP5MG,UQCR10,LHPP
8_Member	GO Biological Processes	GO:0009165	nucleotide biosynthetic process	-5.52919	-3.57852	14/384	203,318,353,513,521,1854,2023,4860,5208,5224,9551,10632,23498,25874	AK1,NUDT2,APRT,ATP5F1D,ATP5ME,DUT,ENO1,PNP,PFKFB2,PGAM2,ATP5MF,ATP5MG,HAAO,MPC2
8_Member	Reactome Gene Sets	R-HSA-8949613	Cristae formation	-5.34791	-3.4484	5/31	513,521,9551,10632,54927	ATP5F1D,ATP5ME,ATP5MF,ATP5MG,CHCHD3
8_Member	GO Biological Processes	GO:1990542	mitochondrial transmembrane transport	-5.29398	-3.41464	8/118	291,293,513,521,9551,10469,10632,25874	SLC25A4,SLC25A6,ATP5F1D,ATP5ME,ATP5MF,TIMM44,ATP5MG,MPC2
8_Member	Reactome Gene Sets	R-HSA-1852241	Organelle biogenesis and maintenance	-5.27972	-3.40512	12/296	513,521,801,805,808,1778,9551,10632,22919,54927,84617,84790	ATP5F1D,ATP5ME,CALM1,CALM2,CALM3,DYNC1H1,ATP5MF,ATP5MG,MAPRE1,CHCHD3,TUBB6,TUBA1C
8_Member	CORUM	CORUM:563	F1F0-ATP synthase, mitochondrial	-5.17243	-3.33204	4/16	513,521,9551,10632	ATP5F1D,ATP5ME,ATP5MF,ATP5MG
8_Member	Reactome Gene Sets	R-HSA-163200	Respiratory electron transport, ATP synthesis by chemiosmotic coupling, and heat production by uncoupling proteins.	-5.10851	-3.28236	8/125	513,521,1329,4724,7381,9551,10632,29796	ATP5F1D,ATP5ME,COX5B,NDUFS4,UQCRB,ATP5MF,ATP5MG,UQCR10
8_Member	GO Biological Processes	GO:0042407	cristae formation	-5.07805	-3.25822	5/35	513,521,9551,10632,54927	ATP5F1D,ATP5ME,ATP5MF,ATP5MG,CHCHD3
8_Member	GO Biological Processes	GO:0072522	purine-containing compound biosynthetic process	-5.00713	-3.20694	12/315	203,318,353,513,521,2023,4860,5208,5224,9551,10632,25874	AK1,NUDT2,APRT,ATP5F1D,ATP5ME,ENO1,PNP,PFKFB2,PGAM2,ATP5MF,ATP5MG,MPC2
8_Member	Reactome Gene Sets	R-HSA-163210	Formation of ATP by chemiosmotic coupling	-4.95224	-3.16388	4/18	513,521,9551,10632	ATP5F1D,ATP5ME,ATP5MF,ATP5MG
8_Member	Reactome Gene Sets	R-HSA-1428517	The citric acid (TCA) cycle and respiratory electron transport	-4.88484	-3.11027	9/176	513,521,1329,4724,7381,9551,10632,25874,29796	ATP5F1D,ATP5ME,COX5B,NDUFS4,UQCRB,ATP5MF,ATP5MG,MPC2,UQCR10
8_Member	GO Biological Processes	GO:0055114	oxidation-reduction process	-4.74553	-3.00046	15/512	39,513,637,801,1329,1528,2023,3146,4724,5224,7381,10994,23498,29796,56898	ACAT2,ATP5F1D,BID,CALM1,COX5B,CYB5A,ENO1,HMGB1,NDUFS4,PGAM2,UQCRB,ILVBL,HAAO,UQCR10,BDH2
8_Member	GO Biological Processes	GO:0009152	purine ribonucleotide biosynthetic process	-4.73003	-2.99022	11/282	203,318,353,513,521,2023,5208,5224,9551,10632,25874	AK1,NUDT2,APRT,ATP5F1D,ATP5ME,ENO1,PFKFB2,PGAM2,ATP5MF,ATP5MG,MPC2
8_Member	GO Biological Processes	GO:0009142	nucleoside triphosphate biosynthetic process	-4.60278	-2.89805	9/191	203,318,513,521,2023,5208,5224,9551,10632	AK1,NUDT2,ATP5F1D,ATP5ME,ENO1,PFKFB2,PGAM2,ATP5MF,ATP5MG
8_Member	GO Biological Processes	GO:0042776	mitochondrial ATP synthesis coupled proton transport	-4.58466	-2.88757	4/22	513,521,9551,10632	ATP5F1D,ATP5ME,ATP5MF,ATP5MG
8_Member	GO Biological Processes	GO:0009260	ribonucleotide biosynthetic process	-4.55016	-2.86427	11/295	203,318,353,513,521,2023,5208,5224,9551,10632,25874	AK1,NUDT2,APRT,ATP5F1D,ATP5ME,ENO1,PFKFB2,PGAM2,ATP5MF,ATP5MG,MPC2
8_Member	GO Biological Processes	GO:0046390	ribose phosphate biosynthetic process	-4.45733	-2.79391	11/302	203,318,353,513,521,2023,5208,5224,9551,10632,25874	AK1,NUDT2,APRT,ATP5F1D,ATP5ME,ENO1,PFKFB2,PGAM2,ATP5MF,ATP5MG,MPC2
8_Member	GO Biological Processes	GO:0006164	purine nucleotide biosynthetic process	-4.4313	-2.78254	11/304	203,318,353,513,521,2023,5208,5224,9551,10632,25874	AK1,NUDT2,APRT,ATP5F1D,ATP5ME,ENO1,PFKFB2,PGAM2,ATP5MF,ATP5MG,MPC2
8_Member	GO Biological Processes	GO:0090407	organophosphate biosynthetic process	-4.32476	-2.69339	17/693	203,318,353,513,521,1854,2023,2185,4860,5208,5224,9551,10632,23498,25874,51084,64077	AK1,NUDT2,APRT,ATP5F1D,ATP5ME,DUT,ENO1,PTK2B,PNP,PFKFB2,PGAM2,ATP5MF,ATP5MG,HAAO,MPC2,CRYL1,LHPP
8_Member	GO Biological Processes	GO:0006754	ATP biosynthetic process	-4.27539	-2.65921	8/163	318,513,521,2023,5208,5224,9551,10632	NUDT2,ATP5F1D,ATP5ME,ENO1,PFKFB2,PGAM2,ATP5MF,ATP5MG
8_Member	GO Biological Processes	GO:0015985	energy coupled proton transport, down electrochemical gradient	-4.21822	-2.61721	4/27	513,521,9551,10632	ATP5F1D,ATP5ME,ATP5MF,ATP5MG
8_Member	GO Biological Processes	GO:0015986	ATP synthesis coupled proton transport	-4.21822	-2.61721	4/27	513,521,9551,10632	ATP5F1D,ATP5ME,ATP5MF,ATP5MG
8_Member	GO Biological Processes	GO:0006839	mitochondrial transport	-4.14804	-2.56072	10/271	291,293,513,521,637,5533,9551,10469,10632,25874	SLC25A4,SLC25A6,ATP5F1D,ATP5ME,BID,PPP3CC,ATP5MF,TIMM44,ATP5MG,MPC2
8_Member	GO Biological Processes	GO:0009206	purine ribonucleoside triphosphate biosynthetic process	-4.07618	-2.50118	8/174	318,513,521,2023,5208,5224,9551,10632	NUDT2,ATP5F1D,ATP5ME,ENO1,PFKFB2,PGAM2,ATP5MF,ATP5MG
8_Member	GO Biological Processes	GO:0007007	inner mitochondrial membrane organization	-4.06665	-2.49308	5/56	513,521,9551,10632,54927	ATP5F1D,ATP5ME,ATP5MF,ATP5MG,CHCHD3
8_Member	GO Biological Processes	GO:0009145	purine nucleoside triphosphate biosynthetic process	-4.05881	-2.48595	8/175	318,513,521,2023,5208,5224,9551,10632	NUDT2,ATP5F1D,ATP5ME,ENO1,PFKFB2,PGAM2,ATP5MF,ATP5MG
8_Member	GO Biological Processes	GO:0009201	ribonucleoside triphosphate biosynthetic process	-3.97373	-2.42707	8/180	318,513,521,2023,5208,5224,9551,10632	NUDT2,ATP5F1D,ATP5ME,ENO1,PFKFB2,PGAM2,ATP5MF,ATP5MG
8_Member	WikiPathways	WP623	Oxidative phosphorylation	-3.92264	-2.38746	5/60	513,521,4724,9551,10632	ATP5F1D,ATP5ME,NDUFS4,ATP5MF,ATP5MG
8_Member	GO Biological Processes	GO:1901137	carbohydrate derivative biosynthetic process	-3.68817	-2.19908	17/783	176,203,318,353,513,521,1854,2023,2817,4969,5208,5224,9551,10632,25874,51084,375790	ACAN,AK1,NUDT2,APRT,ATP5F1D,ATP5ME,DUT,ENO1,GPC1,OGN,PFKFB2,PGAM2,ATP5MF,ATP5MG,MPC2,CRYL1,AGRN
8_Member	GO Biological Processes	GO:1902600	proton transmembrane transport	-3.5504	-2.09891	7/157	513,521,534,1528,5250,9551,10632	ATP5F1D,ATP5ME,ATP6V1G2,CYB5A,SLC25A3,ATP5MF,ATP5MG
8_Member	KEGG Pathway	hsa04714	thermogenesis	-2.78689	-1.47565	8/272	513,521,1329,4724,7381,9551,10632,29796	ATP5F1D,ATP5ME,COX5B,NDUFS4,UQCRB,ATP5MF,ATP5MG,UQCR10
9_Summary	KEGG Pathway	hsa05010	Alzheimer disease	-10.1849	-7.03008	15/196	102,513,637,801,805,808,1329,4035,4137,4724,5533,7381,10313,29796,114787,291,293,521,5138,5716,8546,9551,10469,10632,54832,54927,64756	ADAM10,ATP5F1D,BID,CALM1,CALM2,CALM3,COX5B,LRP1,MAPT,NDUFS4,PPP3CC,UQCRB,RTN3,UQCR10,GPRIN1,SLC25A4,SLC25A6,ATP5ME,PDE2A,PSMD10,AP3B1,ATP5MF,TIMM44,ATP5MG,VPS13C,CHCHD3,ATPAF1
9_Member	KEGG Pathway	hsa05010	Alzheimer disease	-10.1849	-7.03008	15/196	102,513,637,801,805,808,1329,4035,4137,4724,5533,7381,10313,29796,114787	ADAM10,ATP5F1D,BID,CALM1,CALM2,CALM3,COX5B,LRP1,MAPT,NDUFS4,PPP3CC,UQCRB,RTN3,UQCR10,GPRIN1
9_Member	KEGG Pathway	ko05010	Alzheimer's disease	-9.93147	-6.85132	14/171	102,513,637,801,805,808,1329,4035,4137,4724,5533,7381,10313,29796	ADAM10,ATP5F1D,BID,CALM1,CALM2,CALM3,COX5B,LRP1,MAPT,NDUFS4,PPP3CC,UQCRB,RTN3,UQCR10
9_Member	GO Biological Processes	GO:0007005	mitochondrion organization	-6.93991	-4.68917	19/551	291,293,513,521,637,801,808,4137,4724,5138,5533,5716,8546,9551,10469,10632,54832,54927,64756	SLC25A4,SLC25A6,ATP5F1D,ATP5ME,BID,CALM1,CALM3,MAPT,NDUFS4,PDE2A,PPP3CC,PSMD10,AP3B1,ATP5MF,TIMM44,ATP5MG,VPS13C,CHCHD3,ATPAF1
9_Member	GO Biological Processes	GO:0072655	establishment of protein localization to mitochondrion	-4.7038	-2.96918	8/142	293,637,801,808,4137,5533,8546,10469	SLC25A6,BID,CALM1,CALM3,MAPT,PPP3CC,AP3B1,TIMM44
9_Member	WikiPathways	WP2059	Alzheimers Disease	-4.63822	-2.92473	8/145	102,637,801,805,808,4035,4137,5533	ADAM10,BID,CALM1,CALM2,CALM3,LRP1,MAPT,PPP3CC
9_Member	GO Biological Processes	GO:0070585	protein localization to mitochondrion	-4.61671	-2.90908	8/146	293,637,801,808,4137,5533,8546,10469	SLC25A6,BID,CALM1,CALM3,MAPT,PPP3CC,AP3B1,TIMM44
9_Member	GO Biological Processes	GO:0010821	regulation of mitochondrion organization	-2.38199	-1.14628	6/188	637,4137,5138,5533,5716,54832	BID,MAPT,PDE2A,PPP3CC,PSMD10,VPS13C
10_Summary	GO Biological Processes	GO:0070201	regulation of establishment of protein localization	-9.56269	-6.6277	23/573	291,293,637,2039,4035,4137,4345,4924,5066,5208,5478,5533,5879,6616,6714,6804,7430,7447,9647,10204,25874,29085,57506,801,808,5582,6623,8499,8541,9900,26059,80331,112755,358,7857,2185,2950,5947	SLC25A4,SLC25A6,BID,DMTN,LRP1,MAPT,CD200,NUCB1,PAM,PFKFB2,PPIA,PPP3CC,RAC1,SNAP25,SRC,STX1A,EZR,VSNL1,PPM1F,NUTF2,MPC2,PHPT1,MAVS,CALM1,CALM3,PRKCG,SNCG,PPFIA2,PPFIA3,SV2A,ERC2,DNAJC5,STX1B,AQP1,SCG2,PTK2B,GSTP1,RBP1
10_Member	GO Biological Processes	GO:0070201	regulation of establishment of protein localization	-9.56269	-6.6277	23/573	291,293,637,2039,4035,4137,4345,4924,5066,5208,5478,5533,5879,6616,6714,6804,7430,7447,9647,10204,25874,29085,57506	SLC25A4,SLC25A6,BID,DMTN,LRP1,MAPT,CD200,NUCB1,PAM,PFKFB2,PPIA,PPP3CC,RAC1,SNAP25,SRC,STX1A,EZR,VSNL1,PPM1F,NUTF2,MPC2,PHPT1,MAVS
10_Member	GO Biological Processes	GO:0023061	signal release	-9.23041	-6.3339	20/444	291,293,801,808,4035,5208,5582,5879,6616,6623,6804,7447,8499,8541,9900,25874,26059,29085,80331,112755	SLC25A4,SLC25A6,CALM1,CALM3,LRP1,PFKFB2,PRKCG,RAC1,SNAP25,SNCG,STX1A,VSNL1,PPFIA2,PPFIA3,SV2A,MPC2,ERC2,PHPT1,DNAJC5,STX1B
10_Member	GO Biological Processes	GO:0051046	regulation of secretion	-8.14652	-5.63888	22/623	291,293,358,801,808,4035,4345,5066,5208,5478,5582,5879,6616,6623,6804,7430,7447,8499,9900,25874,29085,112755	SLC25A4,SLC25A6,AQP1,CALM1,CALM3,LRP1,CD200,PAM,PFKFB2,PPIA,PRKCG,RAC1,SNAP25,SNCG,STX1A,EZR,VSNL1,PPFIA2,SV2A,MPC2,PHPT1,STX1B
10_Member	GO Biological Processes	GO:0009306	protein secretion	-8.04709	-5.55151	17/370	291,293,2039,4035,4345,5066,5208,5478,5879,6616,6623,6804,7430,7447,7857,25874,29085	SLC25A4,SLC25A6,DMTN,LRP1,CD200,PAM,PFKFB2,PPIA,RAC1,SNAP25,SNCG,STX1A,EZR,VSNL1,SCG2,MPC2,PHPT1
10_Member	GO Biological Processes	GO:0051223	regulation of protein transport	-7.97852	-5.50043	20/526	291,293,2039,4035,4345,4924,5066,5208,5478,5879,6616,6714,6804,7430,7447,9647,10204,25874,29085,57506	SLC25A4,SLC25A6,DMTN,LRP1,CD200,NUCB1,PAM,PFKFB2,PPIA,RAC1,SNAP25,SRC,STX1A,EZR,VSNL1,PPM1F,NUTF2,MPC2,PHPT1,MAVS
10_Member	GO Biological Processes	GO:0090087	regulation of peptide transport	-7.56674	-5.19461	20/557	291,293,2039,4035,4345,4924,5066,5208,5478,5879,6616,6714,6804,7430,7447,9647,10204,25874,29085,57506	SLC25A4,SLC25A6,DMTN,LRP1,CD200,NUCB1,PAM,PFKFB2,PPIA,RAC1,SNAP25,SRC,STX1A,EZR,VSNL1,PPM1F,NUTF2,MPC2,PHPT1,MAVS
10_Member	GO Biological Processes	GO:0002790	peptide secretion	-7.48806	-5.12038	17/404	291,293,2039,4035,4345,5066,5208,5478,5879,6616,6623,6804,7430,7447,7857,25874,29085	SLC25A4,SLC25A6,DMTN,LRP1,CD200,PAM,PFKFB2,PPIA,RAC1,SNAP25,SNCG,STX1A,EZR,VSNL1,SCG2,MPC2,PHPT1
10_Member	GO Biological Processes	GO:1903530	regulation of secretion by cell	-7.46513	-5.10186	20/565	291,293,801,808,4035,4345,5066,5208,5478,5582,5879,6616,6623,6804,7430,7447,8499,25874,29085,112755	SLC25A4,SLC25A6,CALM1,CALM3,LRP1,CD200,PAM,PFKFB2,PPIA,PRKCG,RAC1,SNAP25,SNCG,STX1A,EZR,VSNL1,PPFIA2,MPC2,PHPT1,STX1B
10_Member	GO Biological Processes	GO:0050708	regulation of protein secretion	-7.13362	-4.82393	14/282	291,293,4035,4345,5066,5208,5478,5879,6616,6804,7430,7447,25874,29085	SLC25A4,SLC25A6,LRP1,CD200,PAM,PFKFB2,PPIA,RAC1,SNAP25,STX1A,EZR,VSNL1,MPC2,PHPT1
10_Member	GO Biological Processes	GO:0002791	regulation of peptide secretion	-6.61343	-4.44486	14/311	291,293,4035,4345,5066,5208,5478,5879,6616,6804,7430,7447,25874,29085	SLC25A4,SLC25A6,LRP1,CD200,PAM,PFKFB2,PPIA,RAC1,SNAP25,STX1A,EZR,VSNL1,MPC2,PHPT1
10_Member	GO Biological Processes	GO:0050796	regulation of insulin secretion	-5.7327	-3.72982	10/178	291,293,4035,5208,5879,6616,6804,7447,25874,29085	SLC25A4,SLC25A6,LRP1,PFKFB2,RAC1,SNAP25,STX1A,VSNL1,MPC2,PHPT1
10_Member	GO Biological Processes	GO:1904951	positive regulation of establishment of protein localization	-5.52298	-3.57401	13/331	637,4035,5208,5478,5533,5879,6714,7430,7447,10204,25874,29085,57506	BID,LRP1,PFKFB2,PPIA,PPP3CC,RAC1,SRC,EZR,VSNL1,NUTF2,MPC2,PHPT1,MAVS
10_Member	GO Biological Processes	GO:0030073	insulin secretion	-5.14861	-3.30953	10/207	291,293,4035,5208,5879,6616,6804,7447,25874,29085	SLC25A4,SLC25A6,LRP1,PFKFB2,RAC1,SNAP25,STX1A,VSNL1,MPC2,PHPT1
10_Member	GO Biological Processes	GO:0090276	regulation of peptide hormone secretion	-5.11194	-3.28365	10/209	291,293,4035,5208,5879,6616,6804,7447,25874,29085	SLC25A4,SLC25A6,LRP1,PFKFB2,RAC1,SNAP25,STX1A,VSNL1,MPC2,PHPT1
10_Member	GO Biological Processes	GO:0035774	positive regulation of insulin secretion involved in cellular response to glucose stimulus	-5.07805	-3.25822	5/35	4035,5879,7447,25874,29085	LRP1,RAC1,VSNL1,MPC2,PHPT1
10_Member	GO Biological Processes	GO:0050714	positive regulation of protein secretion	-4.91062	-3.12806	8/133	4035,5208,5478,5879,7430,7447,25874,29085	LRP1,PFKFB2,PPIA,RAC1,EZR,VSNL1,MPC2,PHPT1
10_Member	GO Biological Processes	GO:0032024	positive regulation of insulin secretion	-4.6435	-2.92904	6/71	4035,5208,5879,7447,25874,29085	LRP1,PFKFB2,RAC1,VSNL1,MPC2,PHPT1
10_Member	GO Biological Processes	GO:0051222	positive regulation of protein transport	-4.57718	-2.88461	11/293	4035,5208,5478,5879,6714,7430,7447,10204,25874,29085,57506	LRP1,PFKFB2,PPIA,RAC1,SRC,EZR,VSNL1,NUTF2,MPC2,PHPT1,MAVS
10_Member	GO Biological Processes	GO:0051047	positive regulation of secretion	-4.51004	-2.83214	11/298	358,4035,5208,5478,5879,6804,7430,7447,25874,29085,112755	AQP1,LRP1,PFKFB2,PPIA,RAC1,STX1A,EZR,VSNL1,MPC2,PHPT1,STX1B
10_Member	GO Biological Processes	GO:0030072	peptide hormone secretion	-4.48589	-2.81629	10/247	291,293,4035,5208,5879,6616,6804,7447,25874,29085	SLC25A4,SLC25A6,LRP1,PFKFB2,RAC1,SNAP25,STX1A,VSNL1,MPC2,PHPT1
10_Member	GO Biological Processes	GO:0002793	positive regulation of peptide secretion	-4.45059	-2.78804	8/154	4035,5208,5478,5879,7430,7447,25874,29085	LRP1,PFKFB2,PPIA,RAC1,EZR,VSNL1,MPC2,PHPT1
10_Member	GO Biological Processes	GO:0046883	regulation of hormone secretion	-4.20172	-2.60581	10/267	291,293,4035,5208,5879,6616,6804,7447,25874,29085	SLC25A4,SLC25A6,LRP1,PFKFB2,RAC1,SNAP25,STX1A,VSNL1,MPC2,PHPT1
10_Member	GO Biological Processes	GO:1903532	positive regulation of secretion by cell	-4.20172	-2.60581	10/267	4035,5208,5478,5879,6804,7430,7447,25874,29085,112755	LRP1,PFKFB2,PPIA,RAC1,STX1A,EZR,VSNL1,MPC2,PHPT1,STX1B
10_Member	GO Biological Processes	GO:0061178	regulation of insulin secretion involved in cellular response to glucose stimulus	-4.0296	-2.46657	5/57	4035,5879,7447,25874,29085	LRP1,RAC1,VSNL1,MPC2,PHPT1
10_Member	GO Biological Processes	GO:0090277	positive regulation of peptide hormone secretion	-3.9296	-2.39024	6/95	4035,5208,5879,7447,25874,29085	LRP1,PFKFB2,RAC1,VSNL1,MPC2,PHPT1
10_Member	GO Biological Processes	GO:0035773	insulin secretion involved in cellular response to glucose stimulus	-3.75705	-2.25788	5/65	4035,5879,7447,25874,29085	LRP1,RAC1,VSNL1,MPC2,PHPT1
10_Member	GO Biological Processes	GO:0034284	response to monosaccharide	-3.70441	-2.21297	8/197	2185,2950,4035,5208,5879,7447,25874,29085	PTK2B,GSTP1,LRP1,PFKFB2,RAC1,VSNL1,MPC2,PHPT1
10_Member	GO Biological Processes	GO:0046879	hormone secretion	-3.68302	-2.1951	10/309	291,293,4035,5208,5879,6616,6804,7447,25874,29085	SLC25A4,SLC25A6,LRP1,PFKFB2,RAC1,SNAP25,STX1A,VSNL1,MPC2,PHPT1
10_Member	GO Biological Processes	GO:0009914	hormone transport	-3.54037	-2.09048	10/322	291,293,4035,5208,5879,6616,6804,7447,25874,29085	SLC25A4,SLC25A6,LRP1,PFKFB2,RAC1,SNAP25,STX1A,VSNL1,MPC2,PHPT1
10_Member	GO Biological Processes	GO:0009743	response to carbohydrate	-3.35591	-1.94737	8/222	2185,2950,4035,5208,5879,7447,25874,29085	PTK2B,GSTP1,LRP1,PFKFB2,RAC1,VSNL1,MPC2,PHPT1
10_Member	GO Biological Processes	GO:0046887	positive regulation of hormone secretion	-3.22914	-1.84567	6/128	4035,5208,5879,7447,25874,29085	LRP1,PFKFB2,RAC1,VSNL1,MPC2,PHPT1
10_Member	GO Biological Processes	GO:0009749	response to glucose	-3.11026	-1.74611	7/186	2185,4035,5208,5879,7447,25874,29085	PTK2B,LRP1,PFKFB2,RAC1,VSNL1,MPC2,PHPT1
10_Member	GO Biological Processes	GO:0009746	response to hexose	-3.04284	-1.68825	7/191	2185,4035,5208,5879,7447,25874,29085	PTK2B,LRP1,PFKFB2,RAC1,VSNL1,MPC2,PHPT1
10_Member	GO Biological Processes	GO:0071333	cellular response to glucose stimulus	-2.42762	-1.18366	5/128	4035,5879,7447,25874,29085	LRP1,RAC1,VSNL1,MPC2,PHPT1
10_Member	GO Biological Processes	GO:0071331	cellular response to hexose stimulus	-2.39897	-1.15966	5/130	4035,5879,7447,25874,29085	LRP1,RAC1,VSNL1,MPC2,PHPT1
10_Member	GO Biological Processes	GO:0071326	cellular response to monosaccharide stimulus	-2.38485	-1.14816	5/131	4035,5879,7447,25874,29085	LRP1,RAC1,VSNL1,MPC2,PHPT1
10_Member	GO Biological Processes	GO:0010817	regulation of hormone levels	-2.37226	-1.13753	11/538	291,293,4035,5208,5879,5947,6616,6804,7447,25874,29085	SLC25A4,SLC25A6,LRP1,PFKFB2,RAC1,RBP1,SNAP25,STX1A,VSNL1,MPC2,PHPT1
10_Member	GO Biological Processes	GO:0071322	cellular response to carbohydrate stimulus	-2.27638	-1.05799	5/139	4035,5879,7447,25874,29085	LRP1,RAC1,VSNL1,MPC2,PHPT1
10_Member	GO Biological Processes	GO:0001678	cellular glucose homeostasis	-2.18756	-0.982165	5/146	4035,5879,7447,25874,29085	LRP1,RAC1,VSNL1,MPC2,PHPT1
11_Summary	Reactome Gene Sets	R-HSA-71387	Metabolism of carbohydrates	-9.55524	-6.6277	17/294	176,801,805,808,2023,2817,4969,5208,5224,6233,7311,7314,7316,8402,23729,51084,375790,1854,4860,5138,30833,404037	ACAN,CALM1,CALM2,CALM3,ENO1,GPC1,OGN,PFKFB2,PGAM2,RPS27A,UBA52,UBB,UBC,SLC25A11,SHPK,CRYL1,AGRN,DUT,PNP,PDE2A,NT5C,HAPLN4
11_Member	Reactome Gene Sets	R-HSA-71387	Metabolism of carbohydrates	-9.55524	-6.6277	17/294	176,801,805,808,2023,2817,4969,5208,5224,6233,7311,7314,7316,8402,23729,51084,375790	ACAN,CALM1,CALM2,CALM3,ENO1,GPC1,OGN,PFKFB2,PGAM2,RPS27A,UBA52,UBB,UBC,SLC25A11,SHPK,CRYL1,AGRN
11_Member	GO Biological Processes	GO:1901136	carbohydrate derivative catabolic process	-3.6598	-2.17999	8/200	176,1854,2817,4860,4969,5138,30833,375790	ACAN,DUT,GPC1,PNP,OGN,PDE2A,NT5C,AGRN
11_Member	Reactome Gene Sets	R-HSA-3560782	Diseases associated with glycosaminoglycan metabolism	-3.49508	-2.06149	4/41	176,2817,4969,375790	ACAN,GPC1,OGN,AGRN
11_Member	Reactome Gene Sets	R-HSA-5668914	Diseases of metabolism	-3.07584	-1.71563	8/245	176,2817,4969,6233,7311,7314,7316,375790	ACAN,GPC1,OGN,RPS27A,UBA52,UBB,UBC,AGRN
11_Member	GO Biological Processes	GO:0006027	glycosaminoglycan catabolic process	-2.81089	-1.49535	4/62	176,2817,4969,375790	ACAN,GPC1,OGN,AGRN
11_Member	GO Biological Processes	GO:0006026	aminoglycan catabolic process	-2.66276	-1.38013	4/68	176,2817,4969,375790	ACAN,GPC1,OGN,AGRN
11_Member	Canonical Pathways	M5882	NABA PROTEOGLYCANS	-2.56298	-1.29715	3/35	176,4969,404037	ACAN,OGN,HAPLN4
12_Summary	GO Biological Processes	GO:0010038	response to metal ion	-8.36874	-5.75803	17/352	210,358,513,801,805,808,1528,2039,2185,4137,5066,5224,6647,8826,9456,23498,51596,6714,140885,2098,2950,3371,4259,4924,9588,80854,3146,5138,5582,23209,11240	ALAD,AQP1,ATP5F1D,CALM1,CALM2,CALM3,CYB5A,DMTN,PTK2B,MAPT,PAM,PGAM2,SOD1,IQGAP1,HOMER1,HAAO,CUTA,SRC,SIRPA,ESD,GSTP1,TNC,MGST3,NUCB1,PRDX6,SETD7,HMGB1,PDE2A,PRKCG,MLC1,PADI2
12_Member	GO Biological Processes	GO:0010038	response to metal ion	-8.36874	-5.75803	17/352	210,358,513,801,805,808,1528,2039,2185,4137,5066,5224,6647,8826,9456,23498,51596	ALAD,AQP1,ATP5F1D,CALM1,CALM2,CALM3,CYB5A,DMTN,PTK2B,MAPT,PAM,PGAM2,SOD1,IQGAP1,HOMER1,HAAO,CUTA
12_Member	GO Biological Processes	GO:0010035	response to inorganic substance	-7.03819	-4.75117	19/543	210,358,513,801,805,808,1528,2039,2185,4137,5066,5224,6647,6714,8826,9456,23498,51596,140885	ALAD,AQP1,ATP5F1D,CALM1,CALM2,CALM3,CYB5A,DMTN,PTK2B,MAPT,PAM,PGAM2,SOD1,SRC,IQGAP1,HOMER1,HAAO,CUTA,SIRPA
12_Member	GO Biological Processes	GO:0009636	response to toxic substance	-4.8051	-3.04389	15/506	210,358,801,808,2098,2185,2950,3371,4259,4924,6647,6714,9588,80854,140885	ALAD,AQP1,CALM1,CALM3,ESD,PTK2B,GSTP1,TNC,MGST3,NUCB1,SOD1,SRC,PRDX6,SETD7,SIRPA
12_Member	GO Biological Processes	GO:0031960	response to corticosteroid	-4.49115	-2.82067	8/152	210,358,801,808,2950,3146,5066,6714	ALAD,AQP1,CALM1,CALM3,GSTP1,HMGB1,PAM,SRC
12_Member	GO Biological Processes	GO:0009410	response to xenobiotic stimulus	-4.04358	-2.47496	10/279	358,801,808,2185,2950,4259,5138,5582,6647,9456	AQP1,CALM1,CALM3,PTK2B,GSTP1,MGST3,PDE2A,PRKCG,SOD1,HOMER1
12_Member	GO Biological Processes	GO:0051384	response to glucocorticoid	-3.95489	-2.41223	7/135	210,358,801,808,2950,3146,5066	ALAD,AQP1,CALM1,CALM3,GSTP1,HMGB1,PAM
12_Member	GO Biological Processes	GO:0097305	response to alcohol	-3.92197	-2.38746	9/234	210,801,808,2185,2950,3371,6647,23209,80854	ALAD,CALM1,CALM3,PTK2B,GSTP1,TNC,SOD1,MLC1,SETD7
12_Member	GO Biological Processes	GO:0045471	response to ethanol	-3.24713	-1.8595	6/127	210,2185,2950,3371,6647,80854	ALAD,PTK2B,GSTP1,TNC,SOD1,SETD7
12_Member	GO Biological Processes	GO:0046677	response to antibiotic	-3.01229	-1.66283	9/312	210,358,2185,2950,3371,6647,6714,80854,140885	ALAD,AQP1,PTK2B,GSTP1,TNC,SOD1,SRC,SETD7,SIRPA
12_Member	GO Biological Processes	GO:0048545	response to steroid hormone	-2.82561	-1.50849	9/332	210,358,801,808,2950,3146,5066,6714,11240	ALAD,AQP1,CALM1,CALM3,GSTP1,HMGB1,PAM,SRC,PADI2
13_Summary	GO Biological Processes	GO:0019439	aromatic compound catabolic process	-8.15286	-5.63905	24/738	954,1854,2023,2184,2521,3146,4860,4904,5138,5208,5224,5700,5716,6133,6233,7311,7314,7316,10591,23498,30833,57819,80349,201626,203,353,64077,9588,133121,318	ENTPD2,DUT,ENO1,FAH,FUS,HMGB1,PNP,YBX1,PDE2A,PFKFB2,PGAM2,PSMC1,PSMD10,RPL9,RPS27A,UBA52,UBB,UBC,DNPH1,HAAO,NT5C,LSM2,WDR61,PDE12,AK1,APRT,LHPP,PRDX6,ENPP6,NUDT2
13_Member	GO Biological Processes	GO:0019439	aromatic compound catabolic process	-8.15286	-5.63905	24/738	954,1854,2023,2184,2521,3146,4860,4904,5138,5208,5224,5700,5716,6133,6233,7311,7314,7316,10591,23498,30833,57819,80349,201626	ENTPD2,DUT,ENO1,FAH,FUS,HMGB1,PNP,YBX1,PDE2A,PFKFB2,PGAM2,PSMC1,PSMD10,RPL9,RPS27A,UBA52,UBB,UBC,DNPH1,HAAO,NT5C,LSM2,WDR61,PDE12
13_Member	GO Biological Processes	GO:1901361	organic cyclic compound catabolic process	-7.74741	-5.33789	24/775	954,1854,2023,2184,2521,3146,4860,4904,5138,5208,5224,5700,5716,6133,6233,7311,7314,7316,10591,23498,30833,57819,80349,201626	ENTPD2,DUT,ENO1,FAH,FUS,HMGB1,PNP,YBX1,PDE2A,PFKFB2,PGAM2,PSMC1,PSMD10,RPL9,RPS27A,UBA52,UBB,UBC,DNPH1,HAAO,NT5C,LSM2,WDR61,PDE12
13_Member	GO Biological Processes	GO:0046700	heterocycle catabolic process	-7.63309	-5.23797	23/725	954,1854,2023,2521,3146,4860,4904,5138,5208,5224,5700,5716,6133,6233,7311,7314,7316,10591,23498,30833,57819,80349,201626	ENTPD2,DUT,ENO1,FUS,HMGB1,PNP,YBX1,PDE2A,PFKFB2,PGAM2,PSMC1,PSMD10,RPL9,RPS27A,UBA52,UBB,UBC,DNPH1,HAAO,NT5C,LSM2,WDR61,PDE12
13_Member	GO Biological Processes	GO:0044270	cellular nitrogen compound catabolic process	-7.62215	-5.23637	23/726	954,1854,2023,2521,3146,4860,4904,5138,5208,5224,5700,5716,6133,6233,7311,7314,7316,10591,23498,30833,57819,80349,201626	ENTPD2,DUT,ENO1,FUS,HMGB1,PNP,YBX1,PDE2A,PFKFB2,PGAM2,PSMC1,PSMD10,RPL9,RPS27A,UBA52,UBB,UBC,DNPH1,HAAO,NT5C,LSM2,WDR61,PDE12
13_Member	GO Biological Processes	GO:0034655	nucleobase-containing compound catabolic process	-7.57171	-5.19508	22/671	954,1854,2023,2521,3146,4860,4904,5138,5208,5224,5700,5716,6133,6233,7311,7314,7316,10591,30833,57819,80349,201626	ENTPD2,DUT,ENO1,FUS,HMGB1,PNP,YBX1,PDE2A,PFKFB2,PGAM2,PSMC1,PSMD10,RPL9,RPS27A,UBA52,UBB,UBC,DNPH1,NT5C,LSM2,WDR61,PDE12
13_Member	Reactome Gene Sets	R-HSA-15869	Metabolism of nucleotides	-5.80215	-3.78764	8/101	203,353,954,1854,4860,10591,30833,64077	AK1,APRT,ENTPD2,DUT,PNP,DNPH1,NT5C,LHPP
13_Member	GO Biological Processes	GO:0046434	organophosphate catabolic process	-4.90538	-3.12525	11/270	954,1854,2023,4860,5138,5208,5224,9588,10591,30833,133121	ENTPD2,DUT,ENO1,PNP,PDE2A,PFKFB2,PGAM2,PRDX6,DNPH1,NT5C,ENPP6
13_Member	GO Biological Processes	GO:0034404	nucleobase-containing small molecule biosynthetic process	-4.67027	-2.94966	10/235	353,954,1854,2023,4860,5138,5208,5224,10591,30833	APRT,ENTPD2,DUT,ENO1,PNP,PDE2A,PFKFB2,PGAM2,DNPH1,NT5C
13_Member	GO Biological Processes	GO:1901292	nucleoside phosphate catabolic process	-4.4459	-2.78509	9/200	954,1854,2023,4860,5138,5208,5224,10591,30833	ENTPD2,DUT,ENO1,PNP,PDE2A,PFKFB2,PGAM2,DNPH1,NT5C
13_Member	GO Biological Processes	GO:0009166	nucleotide catabolic process	-3.79615	-2.28666	8/191	1854,2023,4860,5138,5208,5224,10591,30833	DUT,ENO1,PNP,PDE2A,PFKFB2,PGAM2,DNPH1,NT5C
13_Member	Reactome Gene Sets	R-HSA-8956319	Nucleobase catabolism	-3.66986	-2.18646	4/37	954,4860,10591,30833	ENTPD2,PNP,DNPH1,NT5C
13_Member	GO Biological Processes	GO:0046033	AMP metabolic process	-3.58212	-2.12255	3/16	203,318,353	AK1,NUDT2,APRT
13_Member	GO Biological Processes	GO:0009162	deoxyribonucleoside monophosphate metabolic process	-3.50037	-2.0621	3/17	1854,10591,30833	DUT,DNPH1,NT5C
13_Member	Reactome Gene Sets	R-HSA-74259	Purine catabolism	-3.35168	-1.94557	3/19	4860,10591,30833	PNP,DNPH1,NT5C
13_Member	KEGG Pathway	ko00230	Purine metabolism	-3.28156	-1.88833	7/174	203,318,353,954,4860,5138,30833	AK1,NUDT2,APRT,ENTPD2,PNP,PDE2A,NT5C
13_Member	GO Biological Processes	GO:0006195	purine nucleotide catabolic process	-3.26553	-1.8765	4/47	4860,5138,10591,30833	PNP,PDE2A,DNPH1,NT5C
13_Member	KEGG Pathway	hsa00230	Purine metabolism	-3.16582	-1.79279	7/182	203,318,353,954,4860,5138,30833	AK1,NUDT2,APRT,ENTPD2,PNP,PDE2A,NT5C
13_Member	GO Biological Processes	GO:0072523	purine-containing compound catabolic process	-3.00567	-1.65749	4/55	4860,5138,10591,30833	PNP,PDE2A,DNPH1,NT5C
13_Member	GO Biological Processes	GO:0034656	nucleobase-containing small molecule catabolic process	-2.07766	-0.891647	3/52	954,4860,30833	ENTPD2,PNP,NT5C
13_Member	KEGG Pathway	ko00240	Pyrimidine metabolism	-2.00757	-0.83534	4/104	318,1854,4860,30833	NUDT2,DUT,PNP,NT5C
14_Summary	GO Biological Processes	GO:0030100	regulation of endocytosis	-7.94197	-5.47872	15/285	801,808,1012,3146,4035,5533,5582,5879,6647,6714,10326,29978,84251,112755,140885,88,6804,7430,7447,8499,2185,5339,8826,23705,57863,7087	CALM1,CALM3,CDH13,HMGB1,LRP1,PPP3CC,PRKCG,RAC1,SOD1,SRC,SIRPB1,UBQLN2,SGIP1,STX1B,SIRPA,ACTN2,STX1A,EZR,VSNL1,PPFIA2,PTK2B,PLEC,IQGAP1,CADM1,CADM3,ICAM5
14_Member	GO Biological Processes	GO:0030100	regulation of endocytosis	-7.94197	-5.47872	15/285	801,808,1012,3146,4035,5533,5582,5879,6647,6714,10326,29978,84251,112755,140885	CALM1,CALM3,CDH13,HMGB1,LRP1,PPP3CC,PRKCG,RAC1,SOD1,SRC,SIRPB1,UBQLN2,SGIP1,STX1B,SIRPA
14_Member	GO Biological Processes	GO:0060627	regulation of vesicle-mediated transport	-7.8694	-5.41919	20/534	88,801,808,1012,3146,4035,5533,5582,5879,6647,6714,6804,7430,7447,8499,10326,29978,84251,112755,140885	ACTN2,CALM1,CALM3,CDH13,HMGB1,LRP1,PPP3CC,PRKCG,RAC1,SOD1,SRC,STX1A,EZR,VSNL1,PPFIA2,SIRPB1,UBQLN2,SGIP1,STX1B,SIRPA
14_Member	Reactome Gene Sets	R-HSA-1500931	Cell-Cell communication	-7.02681	-4.74345	10/129	88,1012,2185,5339,6714,8826,10326,23705,57863,140885	ACTN2,CDH13,PTK2B,PLEC,SRC,IQGAP1,SIRPB1,CADM1,CADM3,SIRPA
14_Member	Reactome Gene Sets	R-HSA-391160	Signal regulatory protein family interactions	-5.17243	-3.33204	4/16	2185,6714,10326,140885	PTK2B,SRC,SIRPB1,SIRPA
14_Member	GO Biological Processes	GO:0050764	regulation of phagocytosis	-3.87959	-2.35192	6/97	3146,4035,5582,6647,10326,140885	HMGB1,LRP1,PRKCG,SOD1,SIRPB1,SIRPA
14_Member	GO Biological Processes	GO:0045807	positive regulation of endocytosis	-2.82722	-1.5097	6/153	4035,5533,6647,10326,84251,140885	LRP1,PPP3CC,SOD1,SIRPB1,SGIP1,SIRPA
14_Member	GO Biological Processes	GO:0050766	positive regulation of phagocytosis	-2.6864	-1.39679	4/67	4035,6647,10326,140885	LRP1,SOD1,SIRPB1,SIRPA
14_Member	GO Biological Processes	GO:0006909	phagocytosis	-2.41875	-1.17645	9/382	3146,4035,5582,5879,6647,6714,7087,10326,140885	HMGB1,LRP1,PRKCG,RAC1,SOD1,SRC,ICAM5,SIRPB1,SIRPA
15_Summary	WikiPathways	WP3888	VEGFA-VEGFR2 Signaling Pathway	-7.78674	-5.37042	18/435	102,781,813,1465,2185,2317,2817,3146,4860,5879,5954,6714,7430,8402,8826,9588,83442,84790	ADAM10,CACNA2D1,CALU,CSRP1,PTK2B,FLNB,GPC1,HMGB1,PNP,RAC1,RCN1,SRC,EZR,SLC25A11,IQGAP1,PRDX6,SH3BGRL3,TUBA1C
15_Member	WikiPathways	WP3888	VEGFA-VEGFR2 Signaling Pathway	-7.78674	-5.37042	18/435	102,781,813,1465,2185,2317,2817,3146,4860,5879,5954,6714,7430,8402,8826,9588,83442,84790	ADAM10,CACNA2D1,CALU,CSRP1,PTK2B,FLNB,GPC1,HMGB1,PNP,RAC1,RCN1,SRC,EZR,SLC25A11,IQGAP1,PRDX6,SH3BGRL3,TUBA1C
16_Summary	GO Biological Processes	GO:0032386	regulation of intracellular transport	-7.22962	-4.90414	17/421	88,801,808,1778,2039,4924,5582,5936,6714,6804,7430,7905,8499,10204,23209,57506,112755	ACTN2,CALM1,CALM3,DYNC1H1,DMTN,NUCB1,PRKCG,RBM4,SRC,STX1A,EZR,REEP5,PPFIA2,NUTF2,MLC1,MAVS,STX1B
16_Member	GO Biological Processes	GO:0032386	regulation of intracellular transport	-7.22962	-4.90414	17/421	88,801,808,1778,2039,4924,5582,5936,6714,6804,7430,7905,8499,10204,23209,57506,112755	ACTN2,CALM1,CALM3,DYNC1H1,DMTN,NUCB1,PRKCG,RBM4,SRC,STX1A,EZR,REEP5,PPFIA2,NUTF2,MLC1,MAVS,STX1B
16_Member	GO Biological Processes	GO:0032388	positive regulation of intracellular transport	-2.07635	-0.89063	6/218	88,1778,7430,10204,23209,57506	ACTN2,DYNC1H1,EZR,NUTF2,MLC1,MAVS
17_Summary	GO Biological Processes	GO:1901699	cellular response to nitrogen compound	-7.14091	-4.82733	21/650	88,353,358,534,781,1278,2039,2875,2950,4035,4062,5138,5591,6647,6714,7430,7442,9693,57506,201626,375790,2185,4724,3371,11240,23209,8826	ACTN2,APRT,AQP1,ATP6V1G2,CACNA2D1,COL1A2,DMTN,GPT,GSTP1,LRP1,LY6H,PDE2A,PRKDC,SOD1,SRC,EZR,TRPV1,RAPGEF2,MAVS,PDE12,AGRN,PTK2B,NDUFS4,TNC,PADI2,MLC1,IQGAP1
17_Member	GO Biological Processes	GO:1901699	cellular response to nitrogen compound	-7.14091	-4.82733	21/650	88,353,358,534,781,1278,2039,2875,2950,4035,4062,5138,5591,6647,6714,7430,7442,9693,57506,201626,375790	ACTN2,APRT,AQP1,ATP6V1G2,CACNA2D1,COL1A2,DMTN,GPT,GSTP1,LRP1,LY6H,PDE2A,PRKDC,SOD1,SRC,EZR,TRPV1,RAPGEF2,MAVS,PDE12,AGRN
17_Member	GO Biological Processes	GO:0046683	response to organophosphorus	-5.93605	-3.89527	9/131	358,2039,2185,4724,5138,6647,7430,7442,9693	AQP1,DMTN,PTK2B,NDUFS4,PDE2A,SOD1,EZR,TRPV1,RAPGEF2
17_Member	GO Biological Processes	GO:0014074	response to purine-containing compound	-5.56909	-3.60813	9/145	358,2039,2185,4724,5138,6647,7430,7442,9693	AQP1,DMTN,PTK2B,NDUFS4,PDE2A,SOD1,EZR,TRPV1,RAPGEF2
17_Member	GO Biological Processes	GO:0071417	cellular response to organonitrogen compound	-5.26162	-3.39127	17/585	88,353,358,534,781,1278,2039,2875,2950,4035,5138,5591,6647,6714,7430,7442,9693	ACTN2,APRT,AQP1,ATP6V1G2,CACNA2D1,COL1A2,DMTN,GPT,GSTP1,LRP1,PDE2A,PRKDC,SOD1,SRC,EZR,TRPV1,RAPGEF2
17_Member	GO Biological Processes	GO:0051591	response to cAMP	-4.96594	-3.17051	7/94	358,2039,2185,4724,5138,7430,9693	AQP1,DMTN,PTK2B,NDUFS4,PDE2A,EZR,RAPGEF2
17_Member	GO Biological Processes	GO:0071407	cellular response to organic cyclic compound	-4.32815	-2.69597	14/492	358,2039,2950,3371,5138,6647,6714,7430,7442,9693,11240,23209,57506,201626	AQP1,DMTN,GSTP1,TNC,PDE2A,SOD1,SRC,EZR,TRPV1,RAPGEF2,PADI2,MLC1,MAVS,PDE12
17_Member	GO Biological Processes	GO:0071320	cellular response to cAMP	-4.14303	-2.55645	5/54	358,2039,5138,7430,9693	AQP1,DMTN,PDE2A,EZR,RAPGEF2
17_Member	GO Biological Processes	GO:0002064	epithelial cell development	-2.13296	-0.936921	6/212	5138,6647,6714,7430,8826,9693	PDE2A,SOD1,SRC,EZR,IQGAP1,RAPGEF2
17_Member	GO Biological Processes	GO:0061028	establishment of endothelial barrier	-2.05488	-0.872646	3/53	5138,7430,9693	PDE2A,EZR,RAPGEF2
18_Summary	Reactome Gene Sets	R-HSA-9609507	Protein localization	-7.05268	-4.76196	11/163	291,293,1528,6233,6804,7311,7314,7316,8239,10469,54927,358,8402	SLC25A4,SLC25A6,CYB5A,RPS27A,STX1A,UBA52,UBB,UBC,USP9X,TIMM44,CHCHD3,AQP1,SLC25A11
18_Member	Reactome Gene Sets	R-HSA-9609507	Protein localization	-7.05268	-4.76196	11/163	291,293,1528,6233,6804,7311,7314,7316,8239,10469,54927	SLC25A4,SLC25A6,CYB5A,RPS27A,STX1A,UBA52,UBB,UBC,USP9X,TIMM44,CHCHD3
18_Member	Reactome Gene Sets	R-HSA-1268020	Mitochondrial protein import	-2.75978	-1.45599	4/64	291,293,10469,54927	SLC25A4,SLC25A6,TIMM44,CHCHD3
18_Member	GO Biological Processes	GO:0006855	drug transmembrane transport	-2.06605	-0.881785	4/100	291,293,358,8402	SLC25A4,SLC25A6,AQP1,SLC25A11
19_Summary	GO Biological Processes	GO:0031102	neuron projection regeneration	-6.39217	-4.25598	7/58	2596,3371,4035,4974,7070,7143,10752,822,2039,3146,4134,4137,5217,5716,5879,6714,7411,9693,22919,29978,112755,140885,6647,2950	GAP43,TNC,LRP1,OMG,THY1,TNR,CHL1,CAPG,DMTN,HMGB1,MAP4,MAPT,PFN2,PSMD10,RAC1,SRC,VBP1,RAPGEF2,MAPRE1,UBQLN2,STX1B,SIRPA,SOD1,GSTP1
19_Member	GO Biological Processes	GO:0031102	neuron projection regeneration	-6.39217	-4.25598	7/58	2596,3371,4035,4974,7070,7143,10752	GAP43,TNC,LRP1,OMG,THY1,TNR,CHL1
19_Member	GO Biological Processes	GO:0051129	negative regulation of cellular component organization	-4.7162	-2.9783	19/782	822,2039,3146,4035,4134,4137,4974,5217,5716,5879,6714,7070,7143,7411,9693,22919,29978,112755,140885	CAPG,DMTN,HMGB1,LRP1,MAP4,MAPT,OMG,PFN2,PSMD10,RAC1,SRC,THY1,TNR,VBP1,RAPGEF2,MAPRE1,UBQLN2,STX1B,SIRPA
19_Member	GO Biological Processes	GO:0048678	response to axon injury	-4.44189	-2.78456	6/77	2596,3371,4035,6647,7143,10752	GAP43,TNC,LRP1,SOD1,TNR,CHL1
19_Member	GO Biological Processes	GO:0031103	axon regeneration	-4.22263	-2.6196	5/52	2596,3371,4035,7143,10752	GAP43,TNC,LRP1,TNR,CHL1
19_Member	GO Biological Processes	GO:0031345	negative regulation of cell projection organization	-3.90768	-2.37732	8/184	4035,4134,4974,5217,7070,7143,9693,112755	LRP1,MAP4,OMG,PFN2,THY1,TNR,RAPGEF2,STX1B
19_Member	GO Biological Processes	GO:0031099	regeneration	-3.78062	-2.27174	8/192	2596,2950,3371,4035,4974,7070,7143,10752	GAP43,GSTP1,TNC,LRP1,OMG,THY1,TNR,CHL1
19_Member	GO Biological Processes	GO:0010771	negative regulation of cell morphogenesis involved in differentiation	-2.97474	-1.63328	5/96	2039,4974,7070,7143,9693	DMTN,OMG,THY1,TNR,RAPGEF2
19_Member	GO Biological Processes	GO:0010977	negative regulation of neuron projection development	-2.90099	-1.57106	6/148	4035,4974,7070,7143,9693,112755	LRP1,OMG,THY1,TNR,RAPGEF2,STX1B
19_Member	GO Biological Processes	GO:0070570	regulation of neuron projection regeneration	-2.67576	-1.39057	3/32	4035,7070,7143	LRP1,THY1,TNR
19_Member	GO Biological Processes	GO:0045665	negative regulation of neuron differentiation	-2.1523	-0.951757	6/210	4035,4974,7070,7143,9693,112755	LRP1,OMG,THY1,TNR,RAPGEF2,STX1B
20_Summary	Reactome Gene Sets	R-HSA-195258	RHO GTPase Effectors	-6.3508	-4.22489	14/327	801,805,808,1778,1780,4637,5217,5879,6714,8359,8826,22919,84617,84790,214,1211,2596,7430,10752,10226,1212,88,26960,400,54732,80331,7411,534,5700,5716,5582,2781	CALM1,CALM2,CALM3,DYNC1H1,DYNC1I1,MYL6,PFN2,RAC1,SRC,H4C1,IQGAP1,MAPRE1,TUBB6,TUBA1C,ALCAM,CLTA,GAP43,EZR,CHL1,PLIN3,CLTB,ACTN2,NBEA,ARL1,TMED9,DNAJC5,VBP1,ATP6V1G2,PSMC1,PSMD10,PRKCG,GNAZ
20_Member	Reactome Gene Sets	R-HSA-195258	RHO GTPase Effectors	-6.3508	-4.22489	14/327	801,805,808,1778,1780,4637,5217,5879,6714,8359,8826,22919,84617,84790	CALM1,CALM2,CALM3,DYNC1H1,DYNC1I1,MYL6,PFN2,RAC1,SRC,H4C1,IQGAP1,MAPRE1,TUBB6,TUBA1C
20_Member	Reactome Gene Sets	R-HSA-373760	L1CAM interactions	-6.28821	-4.17972	9/119	214,1211,2596,5879,6714,7430,10752,84617,84790	ALCAM,CLTA,GAP43,RAC1,SRC,EZR,CHL1,TUBB6,TUBA1C
20_Member	Reactome Gene Sets	R-HSA-194315	Signaling by Rho GTPases	-5.22745	-3.3627	15/466	801,805,808,1778,1780,4637,5217,5879,6714,8359,8826,10226,22919,84617,84790	CALM1,CALM2,CALM3,DYNC1H1,DYNC1I1,MYL6,PFN2,RAC1,SRC,H4C1,IQGAP1,PLIN3,MAPRE1,TUBB6,TUBA1C
20_Member	Reactome Gene Sets	R-HSA-5663220	RHO GTPases Activate Formins	-4.74842	-3.0023	8/140	1778,1780,5217,5879,6714,22919,84617,84790	DYNC1H1,DYNC1I1,PFN2,RAC1,SRC,MAPRE1,TUBB6,TUBA1C
20_Member	Reactome Gene Sets	R-HSA-437239	Recycling pathway of L1	-4.43752	-2.78362	5/47	1211,6714,7430,84617,84790	CLTA,SRC,EZR,TUBB6,TUBA1C
20_Member	Reactome Gene Sets	R-HSA-157858	Gap junction trafficking and regulation	-4.34864	-2.71401	5/49	1211,1212,6714,84617,84790	CLTA,CLTB,SRC,TUBB6,TUBA1C
20_Member	Reactome Gene Sets	R-HSA-9609736	Assembly and cell surface presentation of NMDA receptors	-3.49508	-2.06149	4/41	88,26960,84617,84790	ACTN2,NBEA,TUBB6,TUBA1C
20_Member	Reactome Gene Sets	R-HSA-190828	Gap junction trafficking	-3.26553	-1.8765	4/47	1211,1212,84617,84790	CLTA,CLTB,TUBB6,TUBA1C
20_Member	Reactome Gene Sets	R-HSA-6811436	COPI-independent Golgi-to-ER retrograde traffic	-3.1299	-1.76178	4/51	1778,1780,84617,84790	DYNC1H1,DYNC1I1,TUBB6,TUBA1C
20_Member	Reactome Gene Sets	R-HSA-3371497	HSP90 chaperone cycle for steroid hormone receptors (SHR)	-3.00567	-1.65749	4/55	1778,1780,84617,84790	DYNC1H1,DYNC1I1,TUBB6,TUBA1C
20_Member	Reactome Gene Sets	R-HSA-6811442	Intra-Golgi and retrograde Golgi-to-ER traffic	-2.9019	-1.57106	7/202	400,1778,1780,10226,54732,84617,84790	ARL1,DYNC1H1,DYNC1I1,PLIN3,TMED9,TUBB6,TUBA1C
20_Member	Reactome Gene Sets	R-HSA-6807878	COPI-mediated anterograde transport	-2.87615	-1.55027	5/101	1778,1780,54732,84617,84790	DYNC1H1,DYNC1I1,TMED9,TUBB6,TUBA1C
20_Member	KEGG Pathway	hsa05130	Pathogenic Escherichia coli infection	-2.86391	-1.53923	4/60	7430,80331,84617,84790	EZR,DNAJC5,TUBB6,TUBA1C
20_Member	Reactome Gene Sets	R-HSA-389957	Prefoldin mediated transfer of substrate to CCT/TriC	-2.84569	-1.52381	3/28	7411,84617,84790	VBP1,TUBB6,TUBA1C
20_Member	KEGG Pathway	ko04145	Phagosome	-2.81281	-1.49609	6/154	534,1778,1780,5879,84617,84790	ATP6V1G2,DYNC1H1,DYNC1I1,RAC1,TUBB6,TUBA1C
20_Member	Reactome Gene Sets	R-HSA-389958	Cooperation of Prefoldin and TriC/CCT in actin and tubulin folding	-2.67576	-1.39057	3/32	7411,84617,84790	VBP1,TUBB6,TUBA1C
20_Member	KEGG Pathway	hsa04145	Phagosome	-2.6224	-1.34628	6/168	534,1778,1780,5879,84617,84790	ATP6V1G2,DYNC1H1,DYNC1I1,RAC1,TUBB6,TUBA1C
20_Member	Reactome Gene Sets	R-HSA-9648025	EML4 and NUDC in mitotic spindle formation	-2.59541	-1.32357	5/117	1778,1780,22919,84617,84790	DYNC1H1,DYNC1I1,MAPRE1,TUBB6,TUBA1C
20_Member	WikiPathways	WP2359	Parkin-Ubiquitin Proteasomal System pathway	-2.59417	-1.3234	4/71	5700,5716,84617,84790	PSMC1,PSMD10,TUBB6,TUBA1C
20_Member	Reactome Gene Sets	R-HSA-2132295	MHC class II antigen presentation	-2.50165	-1.24758	5/123	1211,1778,1780,84617,84790	CLTA,DYNC1H1,DYNC1I1,TUBB6,TUBA1C
20_Member	Reactome Gene Sets	R-HSA-2500257	Resolution of Sister Chromatid Cohesion	-2.45681	-1.20782	5/126	1778,1780,22919,84617,84790	DYNC1H1,DYNC1I1,MAPRE1,TUBB6,TUBA1C
20_Member	Reactome Gene Sets	R-HSA-8856688	Golgi-to-ER retrograde transport	-2.35699	-1.12616	5/133	1778,1780,54732,84617,84790	DYNC1H1,DYNC1I1,TMED9,TUBB6,TUBA1C
20_Member	Reactome Gene Sets	R-HSA-9609690	HCMV Early Events	-2.32964	-1.10299	5/135	1778,1780,8359,84617,84790	DYNC1H1,DYNC1I1,H4C1,TUBB6,TUBA1C
20_Member	KEGG Pathway	ko04540	Gap junction	-2.25965	-1.04344	4/88	5582,6714,84617,84790	PRKCG,SRC,TUBB6,TUBA1C
20_Member	KEGG Pathway	hsa04540	Gap junction	-2.22529	-1.01406	4/90	5582,6714,84617,84790	PRKCG,SRC,TUBB6,TUBA1C
20_Member	Reactome Gene Sets	R-HSA-380320	Recruitment of NuMA to mitotic centrosomes	-2.1592	-0.957447	4/94	1778,22919,84617,84790	DYNC1H1,MAPRE1,TUBB6,TUBA1C
20_Member	Reactome Gene Sets	R-HSA-390466	Chaperonin-mediated protein folding	-2.14319	-0.945663	4/95	2781,7411,84617,84790	GNAZ,VBP1,TUBB6,TUBA1C
20_Member	Reactome Gene Sets	R-HSA-199977	ER to Golgi Anterograde Transport	-2.09228	-0.903341	5/154	1778,1780,54732,84617,84790	DYNC1H1,DYNC1I1,TMED9,TUBB6,TUBA1C
20_Member	Reactome Gene Sets	R-HSA-391251	Protein folding	-2.05117	-0.870091	4/101	2781,7411,84617,84790	GNAZ,VBP1,TUBB6,TUBA1C
20_Member	Reactome Gene Sets	R-HSA-9609646	HCMV Infection	-2.02478	-0.848774	5/160	1778,1780,8359,84617,84790	DYNC1H1,DYNC1I1,H4C1,TUBB6,TUBA1C
20_Member	WikiPathways	WP2272	Pathogenic Escherichia coli infection	-2.01076	-0.837958	3/55	7430,84617,84790	EZR,TUBB6,TUBA1C
20_Member	KEGG Pathway	ko05130	Pathogenic Escherichia coli infection	-2.01076	-0.837958	3/55	7430,84617,84790	EZR,TUBB6,TUBA1C

## Sheet: GO All lists. AD & vascular cat
Category	CategoryID	GO	Description	PARENT_GO	LogP	Enrichment	Z-score	#TotalGeneInLibrary	#GeneInGO	#GeneInHitList	#GeneInGOAndHitList	%InGO	STDV %InGO	GeneID	Hits	Log(q-value)	GeneList
KEGG Pathway	24	hsa05010	Alzheimer disease		-10	9.6	11	28133	196	225	15	6.7	1.7	102|513|637|801|805|808|1329|4035|4137|4724|5533|7381|10313|29796|114787	ADAM10|ATP5F1D|BID|CALM1|CALM2|CALM3|COX5B|LRP1|MAPT|NDUFS4|PPP3CC|UQCRB|RTN3|UQCR10|GPRIN1	-7	MyList
GO Biological Processes	19	GO:0050890	cognition	19_GO:0032501 multicellular organismal process	-2.2	3.2	3.3	28133	276	225	7	3.1	1.2	4137|5582|6285|6616|7143|9369|26047	MAPT|PRKCG|S100B|SNAP25|TNR|NRXN3|CNTNAP2	-0.95	MyList
GO Biological Processes	19	GO:0007611	learning or memory	19_GO:0007610 behavior	-2.5	3.7	3.8	28133	235	225	7	3.1	1.2	4137|5582|6285|6616|7143|9369|26047	MAPT|PRKCG|S100B|SNAP25|TNR|NRXN3|CNTNAP2	-1.3	MyList
GO Biological Processes	19	GO:0072358	cardiovascular system development	19_GO:0032502 developmental process	-2.3	2.2	3.1	28133	786	225	14	6.2	1.6	102|358|1012|1278|2185|3146|3696|4035|5138|6271|7070|7857|9693|113026	ADAM10|AQP1|CDH13|COL1A2|PTK2B|HMGB1|ITGB8|LRP1|PDE2A|S100A1|THY1|SCG2|RAPGEF2|PLCD3	-1.1	MyList
Reactome Gene Sets	6	R-HSA-5218920	VEGFR2 mediated vascular permeability		-4.1	17	7.9	28133	29	225	4	1.8	0.88	801|805|808|5879	CALM1|CALM2|CALM3|RAC1	-2.5	MyList
Reactome Gene Sets	6	R-HSA-202733	Cell surface interactions at the vascular wall		-3.1	5.5	4.7	28133	137	225	6	2.7	1.1	1278|2817|5478|6520|6714|140885	COL1A2|GPC1|PPIA|SLC3A2|SRC|SIRPA	-1.7	MyList
KEGG Pathway	24	ko05418	Fluid shear stress and atherosclerosis		-4.7	7	6.5	28133	142	225	8	3.6	1.2	801|805|808|2817|2950|4259|5879|6714	CALM1|CALM2|CALM3|GPC1|GSTP1|MGST3|RAC1|SRC	-3	MyList
GO Biological Processes	19	GO:0001568	blood vessel development	19_GO:0032502 developmental process	-2.1	2.2	2.9	28133	754	225	13	5.8	1.6	358|1012|1278|2185|3146|3696|4035|5138|6271|7070|7857|9693|113026	AQP1|CDH13|COL1A2|PTK2B|HMGB1|ITGB8|LRP1|PDE2A|S100A1|THY1|SCG2|RAPGEF2|PLCD3	-0.91	MyList
GO Biological Processes	19	GO:0050817	coagulation	19_GO:0032501 multicellular organismal process	-3.3	3.6	4.4	28133	348	225	10	4.4	1.4	954|1278|1465|2039|5478|5582|5879|6714|7450|8546	ENTPD2|COL1A2|CSRP1|DMTN|PPIA|PRKCG|RAC1|SRC|VWF|AP3B1	-1.9	MyList
GO Biological Processes	19	GO:0045055	regulated exocytosis	19_GO:0051179 localization	-14	5.3	11	28133	780	225	33	15	2.4	88|102|210|353|801|808|1778|2039|2950|3146|4860|5269|5478|5582|5879|6616|6647|6804|7450|8499|8541|8826|9588|9900|10326|11240|23071|23406|26059|57020|80331|112755|140885	ACTN2|ADAM10|ALAD|APRT|CALM1|CALM3|DYNC1H1|DMTN|GSTP1|HMGB1|PNP|SERPINB6|PPIA|PRKCG|RAC1|SNAP25|SOD1|STX1A|VWF|PPFIA2|PPFIA3|IQGAP1|PRDX6|SV2A|SIRPB1|PADI2|ERP44|COTL1|ERC2|VPS35L|DNAJC5|STX1B|SIRPA	-9.9	MyList
GO Biological Processes	19	GO:0048858	cell projection morphogenesis	19_GO:0032502 developmental process	-11	5.1	9.6	28133	663	225	27	12	2.2	102|214|2596|2817|4035|4137|4884|4974|5361|5879|6285|6714|7070|7143|7155|7314|7430|8239|8499|8826|9369|9693|10752|10763|23499|26047|55740	ADAM10|ALCAM|GAP43|GPC1|LRP1|MAPT|NPTX1|OMG|PLXNA1|RAC1|S100B|SRC|THY1|TNR|TOP2B|UBB|EZR|USP9X|PPFIA2|IQGAP1|NRXN3|RAPGEF2|CHL1|NES|MACF1|CNTNAP2|ENAH	-7.4	MyList
Reactome Gene Sets	6	R-HSA-112315	Transmission across Chemical Synapses		-11	8.3	11	28133	270	225	18	8	1.8	88|781|801|805|808|4137|5582|5879|6616|6714|6804|8499|8541|9647|26960|80331|84617|84790	ACTN2|CACNA2D1|CALM1|CALM2|CALM3|MAPT|PRKCG|RAC1|SNAP25|SRC|STX1A|PPFIA2|PPFIA3|PPM1F|NBEA|DNAJC5|TUBB6|TUBA1C	-7.4	MyList
Reactome Gene Sets	6	R-HSA-9675108	Nervous system development		-11	5.4	9.6	28133	576	225	25	11	2.1	102|214|1211|1212|2596|2817|4637|5217|5361|5700|5716|5879|6133|6233|6714|7311|7314|7316|7402|7430|10752|55740|84617|84790|375790	ADAM10|ALCAM|CLTA|CLTB|GAP43|GPC1|MYL6|PFN2|PLXNA1|PSMC1|PSMD10|RAC1|RPL9|RPS27A|SRC|UBA52|UBB|UBC|UTRN|EZR|CHL1|ENAH|TUBB6|TUBA1C|AGRN	-7.4	MyList
GO Biological Processes	19	GO:0032990	cell part morphogenesis	19_GO:0032502 developmental process	-11	5	9.4	28133	679	225	27	12	2.2	102|214|2596|2817|4035|4137|4884|4974|5361|5879|6285|6714|7070|7143|7155|7314|7430|8239|8499|8826|9369|9693|10752|10763|23499|26047|55740	ADAM10|ALCAM|GAP43|GPC1|LRP1|MAPT|NPTX1|OMG|PLXNA1|RAC1|S100B|SRC|THY1|TNR|TOP2B|UBB|EZR|USP9X|PPFIA2|IQGAP1|NRXN3|RAPGEF2|CHL1|NES|MACF1|CNTNAP2|ENAH	-7.4	MyList
GO Biological Processes	19	GO:0048812	neuron projection morphogenesis	19_GO:0032502 developmental process	-11	5	9.3	28133	645	225	26	12	2.1	102|214|2596|2817|4035|4137|4884|4974|5361|5879|6285|6714|7070|7143|7155|7314|7430|8239|8499|8826|9369|9693|10752|23499|26047|55740	ADAM10|ALCAM|GAP43|GPC1|LRP1|MAPT|NPTX1|OMG|PLXNA1|RAC1|S100B|SRC|THY1|TNR|TOP2B|UBB|EZR|USP9X|PPFIA2|IQGAP1|NRXN3|RAPGEF2|CHL1|MACF1|CNTNAP2|ENAH	-7.3	MyList
GO Biological Processes	19	GO:0099504	synaptic vesicle cycle	19_GO:0051179 localization	-11	10	11	28133	179	225	15	6.7	1.7	801|808|5533|5582|6616|6623|6804|8499|8541|8546|8943|9900|26059|80331|112755	CALM1|CALM3|PPP3CC|PRKCG|SNAP25|SNCG|STX1A|PPFIA2|PPFIA3|AP3B1|AP3D1|SV2A|ERC2|DNAJC5|STX1B	-7.3	MyList
GO Biological Processes	19	GO:0034332	adherens junction organization	19_GO:0071840 cellular component organization or biogenesis	-11	12	12	28133	150	225	14	6.2	1.6	88|102|1012|2039|2185|4035|5879|6714|7070|8826|9647|23499|23705|57863	ACTN2|ADAM10|CDH13|DMTN|PTK2B|LRP1|RAC1|SRC|THY1|IQGAP1|PPM1F|MACF1|CADM1|CADM3	-7.3	MyList
Reactome Gene Sets	6	R-HSA-112316	Neuronal System		-11	6.4	9.9	28133	410	225	21	9.3	1.9	88|781|801|805|808|4137|5582|5879|6616|6714|6804|8499|8541|9369|9456|9647|10313|26960|80331|84617|84790	ACTN2|CACNA2D1|CALM1|CALM2|CALM3|MAPT|PRKCG|RAC1|SNAP25|SRC|STX1A|PPFIA2|PPFIA3|NRXN3|HOMER1|PPM1F|RTN3|NBEA|DNAJC5|TUBB6|TUBA1C	-7.3	MyList
Reactome Gene Sets	6	R-HSA-422475	Axon guidance		-11	5.4	9.5	28133	551	225	24	11	2.1	102|214|1211|1212|2596|2817|4637|5217|5361|5700|5716|5879|6133|6233|6714|7311|7314|7316|7430|10752|55740|84617|84790|375790	ADAM10|ALCAM|CLTA|CLTB|GAP43|GPC1|MYL6|PFN2|PLXNA1|PSMC1|PSMD10|RAC1|RPL9|RPS27A|SRC|UBA52|UBB|UBC|EZR|CHL1|ENAH|TUBB6|TUBA1C|AGRN	-7.3	MyList
GO Biological Processes	19	GO:0072657	protein localization to membrane	19_GO:0051179 localization	-11	4.9	9.2	28133	658	225	26	12	2.1	88|102|637|801|808|1804|2039|2817|4035|5533|6133|6233|6616|6726|6804|7070|7311|7430|8546|8943|9693|23499|26003|27342|112755|375790	ACTN2|ADAM10|BID|CALM1|CALM3|DPP6|DMTN|GPC1|LRP1|PPP3CC|RPL9|RPS27A|SNAP25|SRP9|STX1A|THY1|UBA52|EZR|AP3B1|AP3D1|RAPGEF2|MACF1|GORASP2|RABGEF1|STX1B|AGRN	-7.3	MyList
GO Biological Processes	19	GO:0120039	plasma membrane bounded cell projection morphogenesis	19_GO:0032502 developmental process	-11	4.9	9.2	28133	659	225	26	12	2.1	102|214|2596|2817|4035|4137|4884|4974|5361|5879|6285|6714|7070|7143|7155|7314|7430|8239|8499|8826|9369|9693|10752|23499|26047|55740	ADAM10|ALCAM|GAP43|GPC1|LRP1|MAPT|NPTX1|OMG|PLXNA1|RAC1|S100B|SRC|THY1|TNR|TOP2B|UBB|EZR|USP9X|PPFIA2|IQGAP1|NRXN3|RAPGEF2|CHL1|MACF1|CNTNAP2|ENAH	-7.3	MyList
GO Biological Processes	19	GO:0099003	vesicle-mediated transport in synapse	19_GO:0051179 localization	-10	9.7	11	28133	193	225	15	6.7	1.7	801|808|5533|5582|6616|6623|6804|8499|8541|8546|8943|9900|26059|80331|112755	CALM1|CALM3|PPP3CC|PRKCG|SNAP25|SNCG|STX1A|PPFIA2|PPFIA3|AP3B1|AP3D1|SV2A|ERC2|DNAJC5|STX1B	-7.1	MyList
GO Biological Processes	19	GO:0009123	nucleoside monophosphate metabolic process	19_GO:0008152 metabolic process	-10	6.4	9.7	28133	388	225	20	8.9	1.9	203|318|353|513|521|637|1329|1854|2023|4724|5208|5224|7381|9551|10591|10632|29796|30833|64077|201626	AK1|NUDT2|APRT|ATP5F1D|ATP5ME|BID|COX5B|DUT|ENO1|NDUFS4|PFKFB2|PGAM2|UQCRB|ATP5MF|DNPH1|ATP5MG|UQCR10|NT5C|LHPP|PDE12	-7.1	MyList
GO Biological Processes	19	GO:0048667	cell morphogenesis involved in neuron differentiation	19_GO:0032502 developmental process	-10	5.2	9.1	28133	579	225	24	11	2.1	102|214|2596|2817|4035|4137|4884|4974|5361|5879|6285|6647|6714|7070|7143|7155|7430|8239|8499|9369|9693|10752|23499|55740	ADAM10|ALCAM|GAP43|GPC1|LRP1|MAPT|NPTX1|OMG|PLXNA1|RAC1|S100B|SOD1|SRC|THY1|TNR|TOP2B|EZR|USP9X|PPFIA2|NRXN3|RAPGEF2|CHL1|MACF1|ENAH	-7.1	MyList
GO Biological Processes	19	GO:0048489	synaptic vesicle transport	19_GO:0051179 localization	-10	12	11	28133	139	225	13	5.8	1.6	801|808|5582|6616|6804|8499|8541|8546|8943|9900|26059|80331|112755	CALM1|CALM3|PRKCG|SNAP25|STX1A|PPFIA2|PPFIA3|AP3B1|AP3D1|SV2A|ERC2|DNAJC5|STX1B	-6.9	MyList
GO Biological Processes	19	GO:0097480	establishment of synaptic vesicle localization	19_GO:0051179 localization	-10	12	11	28133	139	225	13	5.8	1.6	801|808|5582|6616|6804|8499|8541|8546|8943|9900|26059|80331|112755	CALM1|CALM3|PRKCG|SNAP25|STX1A|PPFIA2|PPFIA3|AP3B1|AP3D1|SV2A|ERC2|DNAJC5|STX1B	-6.9	MyList
KEGG Pathway	24	ko05010	Alzheimer's disease		-9.9	10	11	28133	171	225	14	6.2	1.6	102|513|637|801|805|808|1329|4035|4137|4724|5533|7381|10313|29796	ADAM10|ATP5F1D|BID|CALM1|CALM2|CALM3|COX5B|LRP1|MAPT|NDUFS4|PPP3CC|UQCRB|RTN3|UQCR10	-6.9	MyList
GO Biological Processes	19	GO:0061564	axon development	19_GO:0032502 developmental process	-9.8	5.4	9	28133	507	225	22	9.8	2	214|2596|2817|3371|4035|4137|4685|4884|4974|5361|5879|6285|6714|7070|7143|7155|7430|8239|9369|10752|23499|55740	ALCAM|GAP43|GPC1|TNC|LRP1|MAPT|NCAM2|NPTX1|OMG|PLXNA1|RAC1|S100B|SRC|THY1|TNR|TOP2B|EZR|USP9X|NRXN3|CHL1|MACF1|ENAH	-6.7	MyList
GO Biological Processes	19	GO:0000904	cell morphogenesis involved in differentiation	19_GO:0032502 developmental process	-9.7	4.5	8.6	28133	723	225	26	12	2.1	102|214|2039|2596|2817|4035|4137|4884|4974|5361|5591|5879|6285|6647|6714|7070|7143|7155|7430|8239|8499|9369|9693|10752|23499|55740	ADAM10|ALCAM|DMTN|GAP43|GPC1|LRP1|MAPT|NPTX1|OMG|PLXNA1|PRKDC|RAC1|S100B|SOD1|SRC|THY1|TNR|TOP2B|EZR|USP9X|PPFIA2|NRXN3|RAPGEF2|CHL1|MACF1|ENAH	-6.7	MyList
Reactome Gene Sets	6	R-HSA-3858494	Beta-catenin independent WNT signaling		-9.7	11	11	28133	146	225	13	5.8	1.6	801|805|808|1211|1212|5582|5700|5716|5879|6233|7311|7314|7316	CALM1|CALM2|CALM3|CLTA|CLTB|PRKCG|PSMC1|PSMD10|RAC1|RPS27A|UBA52|UBB|UBC	-6.7	MyList
GO Biological Processes	19	GO:0097479	synaptic vesicle localization	19_GO:0051179 localization	-9.6	11	11	28133	148	225	13	5.8	1.6	801|808|5582|6616|6804|8499|8541|8546|8943|9900|26059|80331|112755	CALM1|CALM3|PRKCG|SNAP25|STX1A|PPFIA2|PPFIA3|AP3B1|AP3D1|SV2A|ERC2|DNAJC5|STX1B	-6.7	MyList
Reactome Gene Sets	6	R-HSA-442755	Activation of NMDA receptors and postsynaptic events		-9.6	15	12	28133	93	225	11	4.9	1.4	88|801|805|808|4137|5879|6714|9647|26960|84617|84790	ACTN2|CALM1|CALM2|CALM3|MAPT|RAC1|SRC|PPM1F|NBEA|TUBB6|TUBA1C	-6.7	MyList
GO Biological Processes	19	GO:0006753	nucleoside phosphate metabolic process	19_GO:0008152 metabolic process	-9.6	4.4	8.4	28133	735	225	26	12	2.1	203|318|353|513|521|637|954|1329|1854|2023|4724|4860|5138|5208|5224|7381|9551|10591|10632|23498|23729|25874|29796|30833|64077|201626	AK1|NUDT2|APRT|ATP5F1D|ATP5ME|BID|ENTPD2|COX5B|DUT|ENO1|NDUFS4|PNP|PDE2A|PFKFB2|PGAM2|UQCRB|ATP5MF|DNPH1|ATP5MG|HAAO|SHPK|MPC2|UQCR10|NT5C|LHPP|PDE12	-6.6	MyList
GO Biological Processes	19	GO:0070201	regulation of establishment of protein localization	19_GO:0051179 localization	-9.6	5	8.7	28133	573	225	23	10	2	291|293|637|2039|4035|4137|4345|4924|5066|5208|5478|5533|5879|6616|6714|6804|7430|7447|9647|10204|25874|29085|57506	SLC25A4|SLC25A6|BID|DMTN|LRP1|MAPT|CD200|NUCB1|PAM|PFKFB2|PPIA|PPP3CC|RAC1|SNAP25|SRC|STX1A|EZR|VSNL1|PPM1F|NUTF2|MPC2|PHPT1|MAVS	-6.6	MyList
Reactome Gene Sets	6	R-HSA-71387	Metabolism of carbohydrates		-9.6	7.2	9.6	28133	294	225	17	7.6	1.8	176|801|805|808|2023|2817|4969|5208|5224|6233|7311|7314|7316|8402|23729|51084|375790	ACAN|CALM1|CALM2|CALM3|ENO1|GPC1|OGN|PFKFB2|PGAM2|RPS27A|UBA52|UBB|UBC|SLC25A11|SHPK|CRYL1|AGRN	-6.6	MyList
GO Biological Processes	19	GO:0007044	cell-substrate junction assembly	19_GO:0071840 cellular component organization or biogenesis	-9.3	14	11	28133	100	225	11	4.9	1.4	88|2039|2185|4035|5339|5879|6714|7070|8826|9647|23499	ACTN2|DMTN|PTK2B|LRP1|PLEC|RAC1|SRC|THY1|IQGAP1|PPM1F|MACF1	-6.4	MyList
GO Biological Processes	19	GO:0023061	signal release	19_GO:0023052 signaling	-9.2	5.6	8.8	28133	444	225	20	8.9	1.9	291|293|801|808|4035|5208|5582|5879|6616|6623|6804|7447|8499|8541|9900|25874|26059|29085|80331|112755	SLC25A4|SLC25A6|CALM1|CALM3|LRP1|PFKFB2|PRKCG|RAC1|SNAP25|SNCG|STX1A|VSNL1|PPFIA2|PPFIA3|SV2A|MPC2|ERC2|PHPT1|DNAJC5|STX1B	-6.3	MyList
GO Biological Processes	19	GO:0009167	purine ribonucleoside monophosphate metabolic process	19_GO:0008152 metabolic process	-9.2	6.3	9.1	28133	355	225	18	8	1.8	203|318|353|513|521|637|1329|2023|4724|5208|5224|7381|9551|10632|29796|30833|64077|201626	AK1|NUDT2|APRT|ATP5F1D|ATP5ME|BID|COX5B|ENO1|NDUFS4|PFKFB2|PGAM2|UQCRB|ATP5MF|ATP5MG|UQCR10|NT5C|LHPP|PDE12	-6.3	MyList
GO Biological Processes	19	GO:0009126	purine nucleoside monophosphate metabolic process	19_GO:0008152 metabolic process	-9.1	6.3	9.1	28133	357	225	18	8	1.8	203|318|353|513|521|637|1329|2023|4724|5208|5224|7381|9551|10632|29796|30833|64077|201626	AK1|NUDT2|APRT|ATP5F1D|ATP5ME|BID|COX5B|ENO1|NDUFS4|PFKFB2|PGAM2|UQCRB|ATP5MF|ATP5MG|UQCR10|NT5C|LHPP|PDE12	-6.3	MyList
GO Biological Processes	19	GO:0016079	synaptic vesicle exocytosis	19_GO:0023052 signaling	-9.1	13	11	28133	104	225	11	4.9	1.4	801|808|5582|6616|6804|8499|8541|9900|26059|80331|112755	CALM1|CALM3|PRKCG|SNAP25|STX1A|PPFIA2|PPFIA3|SV2A|ERC2|DNAJC5|STX1B	-6.3	MyList
GO Biological Processes	19	GO:0002274	myeloid leukocyte activation	19_GO:0002376 immune system process	-9.1	4.5	8.3	28133	660	225	24	11	2.1	102|210|353|1778|2950|3146|3696|4137|4345|4860|5269|5478|5879|6616|8826|9588|10326|11240|23071|23406|23729|57020|80331|140885	ADAM10|ALAD|APRT|DYNC1H1|GSTP1|HMGB1|ITGB8|MAPT|CD200|PNP|SERPINB6|PPIA|RAC1|SNAP25|IQGAP1|PRDX6|SIRPB1|PADI2|ERP44|COTL1|SHPK|VPS35L|DNAJC5|SIRPA	-6.3	MyList
Reactome Gene Sets	6	R-HSA-9663891	Selective autophagy		-9	15	12	28133	81	225	10	4.4	1.4	1778|1780|6233|6714|7311|7314|7316|10226|84617|84790	DYNC1H1|DYNC1I1|RPS27A|SRC|UBA52|UBB|UBC|PLIN3|TUBB6|TUBA1C	-6.2	MyList
GO Biological Processes	19	GO:0007409	axonogenesis	19_GO:0032502 developmental process	-9	5.4	8.6	28133	460	225	20	8.9	1.9	214|2596|2817|4035|4137|4884|4974|5361|5879|6285|6714|7070|7143|7155|7430|8239|9369|10752|23499|55740	ALCAM|GAP43|GPC1|LRP1|MAPT|NPTX1|OMG|PLXNA1|RAC1|S100B|SRC|THY1|TNR|TOP2B|EZR|USP9X|NRXN3|CHL1|MACF1|ENAH	-6.2	MyList
Reactome Gene Sets	6	R-HSA-5653656	Vesicle-mediated transport		-8.9	4.5	8.2	28133	673	225	24	11	2.1	400|801|805|808|1211|1212|1278|1778|1780|4035|5879|6233|6714|7311|7314|7316|8546|10226|27342|29978|54732|84251|84617|84790	ARL1|CALM1|CALM2|CALM3|CLTA|CLTB|COL1A2|DYNC1H1|DYNC1I1|LRP1|RAC1|RPS27A|SRC|UBA52|UBB|UBC|AP3B1|PLIN3|RABGEF1|UBQLN2|TMED9|SGIP1|TUBB6|TUBA1C	-6.1	MyList
Reactome Gene Sets	6	R-HSA-1168372	Downstream signaling events of B Cell Receptor (BCR)		-8.9	15	12	28133	83	225	10	4.4	1.4	801|805|808|5478|5700|5716|6233|7311|7314|7316	CALM1|CALM2|CALM3|PPIA|PSMC1|PSMD10|RPS27A|UBA52|UBB|UBC	-6.1	MyList
GO Biological Processes	19	GO:0009161	ribonucleoside monophosphate metabolic process	19_GO:0008152 metabolic process	-8.9	6.1	8.8	28133	371	225	18	8	1.8	203|318|353|513|521|637|1329|2023|4724|5208|5224|7381|9551|10632|29796|30833|64077|201626	AK1|NUDT2|APRT|ATP5F1D|ATP5ME|BID|COX5B|ENO1|NDUFS4|PFKFB2|PGAM2|UQCRB|ATP5MF|ATP5MG|UQCR10|NT5C|LHPP|PDE12	-6.1	MyList
Reactome Gene Sets	6	R-HSA-9648002	RAS processing		-8.8	32	15	28133	27	225	7	3.1	1.2	801|805|808|6233|7311|7314|7316	CALM1|CALM2|CALM3|RPS27A|UBA52|UBB|UBC	-6.1	MyList
GO Biological Processes	19	GO:0007045	cell-substrate adherens junction assembly	19_GO:0071840 cellular component organization or biogenesis	-8.8	15	11	28133	85	225	10	4.4	1.4	88|2039|2185|4035|5879|6714|7070|8826|9647|23499	ACTN2|DMTN|PTK2B|LRP1|RAC1|SRC|THY1|IQGAP1|PPM1F|MACF1	-6	MyList
GO Biological Processes	19	GO:0048041	focal adhesion assembly	19_GO:0022610 biological adhesion	-8.8	15	11	28133	85	225	10	4.4	1.4	88|2039|2185|4035|5879|6714|7070|8826|9647|23499	ACTN2|DMTN|PTK2B|LRP1|RAC1|SRC|THY1|IQGAP1|PPM1F|MACF1	-6	MyList
Reactome Gene Sets	6	R-HSA-9646399	Aggrephagy		-8.8	23	13	28133	43	225	8	3.6	1.2	1778|1780|6233|7311|7314|7316|84617|84790	DYNC1H1|DYNC1I1|RPS27A|UBA52|UBB|UBC|TUBB6|TUBA1C	-6	MyList
Reactome Gene Sets	6	R-HSA-6798695	Neutrophil degranulation		-8.6	5.2	8.4	28133	480	225	20	8.9	1.9	102|210|353|1778|2950|3146|4860|5269|5478|5879|6616|8826|9588|10326|11240|23071|23406|57020|80331|140885	ADAM10|ALAD|APRT|DYNC1H1|GSTP1|HMGB1|PNP|SERPINB6|PPIA|RAC1|SNAP25|IQGAP1|PRDX6|SIRPB1|PADI2|ERP44|COTL1|VPS35L|DNAJC5|SIRPA	-5.9	MyList
Reactome Gene Sets	6	R-HSA-8982491	Glycogen metabolism		-8.6	30	14	28133	29	225	7	3.1	1.2	801|805|808|6233|7311|7314|7316	CALM1|CALM2|CALM3|RPS27A|UBA52|UBB|UBC	-5.9	MyList
GO Biological Processes	19	GO:0120035	regulation of plasma membrane bounded cell projection organization	19_GO:0071840 cellular component organization or biogenesis	-8.6	4.3	7.9	28133	703	225	24	11	2.1	102|2039|2185|2596|4035|4134|4137|4974|5217|5361|5879|6616|6714|7070|7143|7430|8499|8826|9456|9693|23499|112755|257194|375790	ADAM10|DMTN|PTK2B|GAP43|LRP1|MAP4|MAPT|OMG|PFN2|PLXNA1|RAC1|SNAP25|SRC|THY1|TNR|EZR|PPFIA2|IQGAP1|HOMER1|RAPGEF2|MACF1|STX1B|NEGR1|AGRN	-5.9	MyList
GO Biological Processes	19	GO:0043312	neutrophil degranulation	19_GO:0002376 immune system process	-8.6	5.1	8.3	28133	486	225	20	8.9	1.9	102|210|353|1778|2950|3146|4860|5269|5478|5879|6616|8826|9588|10326|11240|23071|23406|57020|80331|140885	ADAM10|ALAD|APRT|DYNC1H1|GSTP1|HMGB1|PNP|SERPINB6|PPIA|RAC1|SNAP25|IQGAP1|PRDX6|SIRPB1|PADI2|ERP44|COTL1|VPS35L|DNAJC5|SIRPA	-5.9	MyList
GO Biological Processes	19	GO:0002283	neutrophil activation involved in immune response	19_GO:0002376 immune system process	-8.5	5.1	8.2	28133	489	225	20	8.9	1.9	102|210|353|1778|2950|3146|4860|5269|5478|5879|6616|8826|9588|10326|11240|23071|23406|57020|80331|140885	ADAM10|ALAD|APRT|DYNC1H1|GSTP1|HMGB1|PNP|SERPINB6|PPIA|RAC1|SNAP25|IQGAP1|PRDX6|SIRPB1|PADI2|ERP44|COTL1|VPS35L|DNAJC5|SIRPA	-5.8	MyList
GO Biological Processes	19	GO:0051650	establishment of vesicle localization	19_GO:0051179 localization	-8.5	6.6	8.8	28133	301	225	16	7.1	1.7	801|808|1778|1780|5582|6616|6804|8499|8541|8546|8943|9900|26059|54732|80331|112755	CALM1|CALM3|DYNC1H1|DYNC1I1|PRKCG|SNAP25|STX1A|PPFIA2|PPFIA3|AP3B1|AP3D1|SV2A|ERC2|TMED9|DNAJC5|STX1B	-5.8	MyList
GO Biological Processes	19	GO:0031344	regulation of cell projection organization	19_GO:0071840 cellular component organization or biogenesis	-8.5	4.2	7.8	28133	712	225	24	11	2.1	102|2039|2185|2596|4035|4134|4137|4974|5217|5361|5879|6616|6714|7070|7143|7430|8499|8826|9456|9693|23499|112755|257194|375790	ADAM10|DMTN|PTK2B|GAP43|LRP1|MAP4|MAPT|OMG|PFN2|PLXNA1|RAC1|SNAP25|SRC|THY1|TNR|EZR|PPFIA2|IQGAP1|HOMER1|RAPGEF2|MACF1|STX1B|NEGR1|AGRN	-5.8	MyList
Reactome Gene Sets	6	R-HSA-4086400	PCP/CE pathway		-8.4	14	11	28133	92	225	10	4.4	1.4	1211|1212|5582|5700|5716|5879|6233|7311|7314|7316	CLTA|CLTB|PRKCG|PSMC1|PSMD10|RAC1|RPS27A|UBA52|UBB|UBC	-5.8	MyList
Reactome Gene Sets	6	R-HSA-8876493	InlA-mediated entry of Listeria monocytogenes into host cells		-8.4	69	18	28133	9	225	5	2.2	0.98	6233|6714|7311|7314|7316	RPS27A|SRC|UBA52|UBB|UBC	-5.8	MyList
Reactome Gene Sets	6	R-HSA-1253288	Downregulation of ERBB4 signaling		-8.4	69	18	28133	9	225	5	2.2	0.98	6233|6714|7311|7314|7316	RPS27A|SRC|UBA52|UBB|UBC	-5.8	MyList
Reactome Gene Sets	6	R-HSA-9683683	Maturation of protein E		-8.4	1.3e+02	22	28133	4	225	4	1.8	0.88	6233|7311|7314|7316	RPS27A|UBA52|UBB|UBC	-5.8	MyList
Reactome Gene Sets	6	R-HSA-9694493	Maturation of protein E		-8.4	1.3e+02	22	28133	4	225	4	1.8	0.88	6233|7311|7314|7316	RPS27A|UBA52|UBB|UBC	-5.8	MyList
Reactome Gene Sets	6	R-HSA-5339562	Uptake and actions of bacterial toxins		-8.4	28	14	28133	31	225	7	3.1	1.2	801|805|808|6616|6804|9900|112755	CALM1|CALM2|CALM3|SNAP25|STX1A|SV2A|STX1B	-5.8	MyList
GO Biological Processes	19	GO:0010038	response to metal ion	19_GO:0050896 response to stimulus	-8.4	6	8.5	28133	352	225	17	7.6	1.8	210|358|513|801|805|808|1528|2039|2185|4137|5066|5224|6647|8826|9456|23498|51596	ALAD|AQP1|ATP5F1D|CALM1|CALM2|CALM3|CYB5A|DMTN|PTK2B|MAPT|PAM|PGAM2|SOD1|IQGAP1|HOMER1|HAAO|CUTA	-5.8	MyList
GO Biological Processes	19	GO:0002444	myeloid leukocyte mediated immunity	19_GO:0002376 immune system process	-8.4	4.8	8	28133	552	225	21	9.3	1.9	102|210|353|1778|2950|3146|4860|5269|5478|5879|6616|8826|9588|10326|11240|23071|23406|57020|57506|80331|140885	ADAM10|ALAD|APRT|DYNC1H1|GSTP1|HMGB1|PNP|SERPINB6|PPIA|RAC1|SNAP25|IQGAP1|PRDX6|SIRPB1|PADI2|ERP44|COTL1|VPS35L|MAVS|DNAJC5|SIRPA	-5.8	MyList
GO Biological Processes	19	GO:0002446	neutrophil mediated immunity	19_GO:0002376 immune system process	-8.3	5	8.1	28133	500	225	20	8.9	1.9	102|210|353|1778|2950|3146|4860|5269|5478|5879|6616|8826|9588|10326|11240|23071|23406|57020|80331|140885	ADAM10|ALAD|APRT|DYNC1H1|GSTP1|HMGB1|PNP|SERPINB6|PPIA|RAC1|SNAP25|IQGAP1|PRDX6|SIRPB1|PADI2|ERP44|COTL1|VPS35L|DNAJC5|SIRPA	-5.8	MyList
GO Biological Processes	19	GO:0042119	neutrophil activation	19_GO:0002376 immune system process	-8.3	5	8.1	28133	501	225	20	8.9	1.9	102|210|353|1778|2950|3146|4860|5269|5478|5879|6616|8826|9588|10326|11240|23071|23406|57020|80331|140885	ADAM10|ALAD|APRT|DYNC1H1|GSTP1|HMGB1|PNP|SERPINB6|PPIA|RAC1|SNAP25|IQGAP1|PRDX6|SIRPB1|PADI2|ERP44|COTL1|VPS35L|DNAJC5|SIRPA	-5.7	MyList
GO Biological Processes	19	GO:0007269	neurotransmitter secretion	19_GO:0023052 signaling	-8.3	9.7	9.7	28133	155	225	12	5.3	1.5	801|808|5582|6616|6623|6804|8499|8541|9900|26059|80331|112755	CALM1|CALM3|PRKCG|SNAP25|SNCG|STX1A|PPFIA2|PPFIA3|SV2A|ERC2|DNAJC5|STX1B	-5.7	MyList
GO Biological Processes	19	GO:0009117	nucleotide metabolic process	19_GO:0008152 metabolic process	-8.3	4.1	7.7	28133	726	225	24	11	2.1	203|318|353|513|521|637|1329|1854|2023|4724|4860|5138|5208|5224|7381|9551|10591|10632|23498|23729|25874|29796|30833|201626	AK1|NUDT2|APRT|ATP5F1D|ATP5ME|BID|COX5B|DUT|ENO1|NDUFS4|PNP|PDE2A|PFKFB2|PGAM2|UQCRB|ATP5MF|DNPH1|ATP5MG|HAAO|SHPK|MPC2|UQCR10|NT5C|PDE12	-5.7	MyList
GO Biological Processes	19	GO:0099643	signal release from synapse	19_GO:0023052 signaling	-8.3	9.6	9.7	28133	156	225	12	5.3	1.5	801|808|5582|6616|6623|6804|8499|8541|9900|26059|80331|112755	CALM1|CALM3|PRKCG|SNAP25|SNCG|STX1A|PPFIA2|PPFIA3|SV2A|ERC2|DNAJC5|STX1B	-5.7	MyList
Reactome Gene Sets	6	R-HSA-5626467	RHO GTPases activate IQGAPs		-8.3	27	13	28133	32	225	7	3.1	1.2	801|805|808|5879|8826|84617|84790	CALM1|CALM2|CALM3|RAC1|IQGAP1|TUBB6|TUBA1C	-5.7	MyList
GO Biological Processes	19	GO:0034333	adherens junction assembly	19_GO:0071840 cellular component organization or biogenesis	-8.3	13	11	28133	96	225	10	4.4	1.4	88|2039|2185|4035|5879|6714|7070|8826|9647|23499	ACTN2|DMTN|PTK2B|LRP1|RAC1|SRC|THY1|IQGAP1|PPM1F|MACF1	-5.7	MyList
GO Biological Processes	19	GO:0036230	granulocyte activation	19_GO:0002376 immune system process	-8.3	4.9	8	28133	506	225	20	8.9	1.9	102|210|353|1778|2950|3146|4860|5269|5478|5879|6616|8826|9588|10326|11240|23071|23406|57020|80331|140885	ADAM10|ALAD|APRT|DYNC1H1|GSTP1|HMGB1|PNP|SERPINB6|PPIA|RAC1|SNAP25|IQGAP1|PRDX6|SIRPB1|PADI2|ERP44|COTL1|VPS35L|DNAJC5|SIRPA	-5.7	MyList
GO Biological Processes	19	GO:0001952	regulation of cell-matrix adhesion	19_GO:0022610 biological adhesion	-8.3	11	10	28133	125	225	11	4.9	1.4	1012|2039|2185|4035|5879|6714|7070|7402|8826|9647|23499	CDH13|DMTN|PTK2B|LRP1|RAC1|SRC|THY1|UTRN|IQGAP1|PPM1F|MACF1	-5.7	MyList
GO Biological Processes	19	GO:0051648	vesicle localization	19_GO:0051179 localization	-8.2	6.4	8.6	28133	314	225	16	7.1	1.7	801|808|1778|1780|5582|6616|6804|8499|8541|8546|8943|9900|26059|54732|80331|112755	CALM1|CALM3|DYNC1H1|DYNC1I1|PRKCG|SNAP25|STX1A|PPFIA2|PPFIA3|AP3B1|AP3D1|SV2A|ERC2|TMED9|DNAJC5|STX1B	-5.7	MyList
GO Biological Processes	19	GO:0007160	cell-matrix adhesion	19_GO:0022610 biological adhesion	-8.2	7.6	9	28133	231	225	14	6.2	1.6	88|1012|2039|2185|3696|4035|5879|6714|7070|7402|8499|8826|9647|23499	ACTN2|CDH13|DMTN|PTK2B|ITGB8|LRP1|RAC1|SRC|THY1|UTRN|PPFIA2|IQGAP1|PPM1F|MACF1	-5.7	MyList
GO Biological Processes	19	GO:0034330	cell junction organization	19_GO:0071840 cellular component organization or biogenesis	-8.2	6.3	8.5	28133	317	225	16	7.1	1.7	88|102|1012|2039|2185|4035|5339|5879|6714|7070|8826|9647|9693|23499|23705|57863	ACTN2|ADAM10|CDH13|DMTN|PTK2B|LRP1|PLEC|RAC1|SRC|THY1|IQGAP1|PPM1F|RAPGEF2|MACF1|CADM1|CADM3	-5.7	MyList
GO Biological Processes	19	GO:0019439	aromatic compound catabolic process	19_GO:0008152 metabolic process	-8.2	4.1	7.6	28133	738	225	24	11	2.1	954|1854|2023|2184|2521|3146|4860|4904|5138|5208|5224|5700|5716|6133|6233|7311|7314|7316|10591|23498|30833|57819|80349|201626	ENTPD2|DUT|ENO1|FAH|FUS|HMGB1|PNP|YBX1|PDE2A|PFKFB2|PGAM2|PSMC1|PSMD10|RPL9|RPS27A|UBA52|UBB|UBC|DNPH1|HAAO|NT5C|LSM2|WDR61|PDE12	-5.6	MyList
GO Biological Processes	19	GO:0051046	regulation of secretion	19_GO:0051179 localization	-8.1	4.4	7.7	28133	623	225	22	9.8	2	291|293|358|801|808|4035|4345|5066|5208|5478|5582|5879|6616|6623|6804|7430|7447|8499|9900|25874|29085|112755	SLC25A4|SLC25A6|AQP1|CALM1|CALM3|LRP1|CD200|PAM|PFKFB2|PPIA|PRKCG|RAC1|SNAP25|SNCG|STX1A|EZR|VSNL1|PPFIA2|SV2A|MPC2|PHPT1|STX1B	-5.6	MyList
Reactome Gene Sets	6	R-HSA-5607764	CLEC7A (Dectin-1) signaling		-8	12	10	28133	101	225	10	4.4	1.4	801|805|808|5700|5716|6233|6714|7311|7314|7316	CALM1|CALM2|CALM3|PSMC1|PSMD10|RPS27A|SRC|UBA52|UBB|UBC	-5.6	MyList
GO Biological Processes	19	GO:0009306	protein secretion	19_GO:0051179 localization	-8	5.7	8.2	28133	370	225	17	7.6	1.8	291|293|2039|4035|4345|5066|5208|5478|5879|6616|6623|6804|7430|7447|7857|25874|29085	SLC25A4|SLC25A6|DMTN|LRP1|CD200|PAM|PFKFB2|PPIA|RAC1|SNAP25|SNCG|STX1A|EZR|VSNL1|SCG2|MPC2|PHPT1	-5.6	MyList
Reactome Gene Sets	6	R-HSA-199991	Membrane Trafficking		-8	4.3	7.6	28133	634	225	22	9.8	2	400|801|805|808|1211|1212|1778|1780|5879|6233|6714|7311|7314|7316|8546|10226|27342|29978|54732|84251|84617|84790	ARL1|CALM1|CALM2|CALM3|CLTA|CLTB|DYNC1H1|DYNC1I1|RAC1|RPS27A|SRC|UBA52|UBB|UBC|AP3B1|PLIN3|RABGEF1|UBQLN2|TMED9|SGIP1|TUBB6|TUBA1C	-5.5	MyList
GO Biological Processes	19	GO:0051656	establishment of organelle localization	19_GO:0051179 localization	-8	4.8	7.8	28133	526	225	20	8.9	1.9	801|808|1778|1780|4134|4137|5582|6616|6804|7314|7430|8499|8541|8546|8943|9900|26059|54732|80331|112755	CALM1|CALM3|DYNC1H1|DYNC1I1|MAP4|MAPT|PRKCG|SNAP25|STX1A|UBB|EZR|PPFIA2|PPFIA3|AP3B1|AP3D1|SV2A|ERC2|TMED9|DNAJC5|STX1B	-5.5	MyList
GO Biological Processes	19	GO:0051223	regulation of protein transport	19_GO:0051179 localization	-8	4.8	7.8	28133	526	225	20	8.9	1.9	291|293|2039|4035|4345|4924|5066|5208|5478|5879|6616|6714|6804|7430|7447|9647|10204|25874|29085|57506	SLC25A4|SLC25A6|DMTN|LRP1|CD200|NUCB1|PAM|PFKFB2|PPIA|RAC1|SNAP25|SRC|STX1A|EZR|VSNL1|PPM1F|NUTF2|MPC2|PHPT1|MAVS	-5.5	MyList
WikiPathways	27	WP111	Electron Transport Chain (OXPHOS system in mitochondria)		-8	12	10	28133	103	225	10	4.4	1.4	291|293|513|521|1329|4724|7381|9551|10632|29796	SLC25A4|SLC25A6|ATP5F1D|ATP5ME|COX5B|NDUFS4|UQCRB|ATP5MF|ATP5MG|UQCR10	-5.5	MyList
GO Biological Processes	19	GO:0030100	regulation of endocytosis	19_GO:0051179 localization	-7.9	6.6	8.5	28133	285	225	15	6.7	1.7	801|808|1012|3146|4035|5533|5582|5879|6647|6714|10326|29978|84251|112755|140885	CALM1|CALM3|CDH13|HMGB1|LRP1|PPP3CC|PRKCG|RAC1|SOD1|SRC|SIRPB1|UBQLN2|SGIP1|STX1B|SIRPA	-5.5	MyList
Reactome Gene Sets	6	R-HSA-8852276	The role of GTSE1 in G2/M progression after G2 checkpoint		-7.9	15	11	28133	77	225	9	4	1.3	5700|5716|6233|7311|7314|7316|22919|84617|84790	PSMC1|PSMD10|RPS27A|UBA52|UBB|UBC|MAPRE1|TUBB6|TUBA1C	-5.5	MyList
GO Biological Processes	19	GO:0006935	chemotaxis	19_GO:0040011 locomotion	-7.9	4.3	7.5	28133	644	225	22	9.8	2	102|214|1012|1652|2185|2596|2817|2950|3146|4035|5361|5478|5879|6714|7143|7430|7857|9369|9647|10752|11240|55740	ADAM10|ALCAM|CDH13|DDT|PTK2B|GAP43|GPC1|GSTP1|HMGB1|LRP1|PLXNA1|PPIA|RAC1|SRC|TNR|EZR|SCG2|NRXN3|PPM1F|CHL1|PADI2|ENAH	-5.4	MyList
GO Biological Processes	19	GO:0060627	regulation of vesicle-mediated transport	19_GO:0051179 localization	-7.9	4.7	7.7	28133	534	225	20	8.9	1.9	88|801|808|1012|3146|4035|5533|5582|5879|6647|6714|6804|7430|7447|8499|10326|29978|84251|112755|140885	ACTN2|CALM1|CALM3|CDH13|HMGB1|LRP1|PPP3CC|PRKCG|RAC1|SOD1|SRC|STX1A|EZR|VSNL1|PPFIA2|SIRPB1|UBQLN2|SGIP1|STX1B|SIRPA	-5.4	MyList
GO Biological Processes	19	GO:0042330	taxis	19_GO:0040011 locomotion	-7.9	4.3	7.5	28133	646	225	22	9.8	2	102|214|1012|1652|2185|2596|2817|2950|3146|4035|5361|5478|5879|6714|7143|7430|7857|9369|9647|10752|11240|55740	ADAM10|ALCAM|CDH13|DDT|PTK2B|GAP43|GPC1|GSTP1|HMGB1|LRP1|PLXNA1|PPIA|RAC1|SRC|TNR|EZR|SCG2|NRXN3|PPM1F|CHL1|PADI2|ENAH	-5.4	MyList
GO Biological Processes	19	GO:0043299	leukocyte degranulation	19_GO:0002376 immune system process	-7.8	4.7	7.7	28133	537	225	20	8.9	1.9	102|210|353|1778|2950|3146|4860|5269|5478|5879|6616|8826|9588|10326|11240|23071|23406|57020|80331|140885	ADAM10|ALAD|APRT|DYNC1H1|GSTP1|HMGB1|PNP|SERPINB6|PPIA|RAC1|SNAP25|IQGAP1|PRDX6|SIRPB1|PADI2|ERP44|COTL1|VPS35L|DNAJC5|SIRPA	-5.4	MyList
GO Biological Processes	19	GO:0006163	purine nucleotide metabolic process	19_GO:0008152 metabolic process	-7.8	4.4	7.6	28133	594	225	21	9.3	1.9	203|318|353|513|521|637|1329|2023|4724|4860|5138|5208|5224|7381|9551|10591|10632|25874|29796|30833|201626	AK1|NUDT2|APRT|ATP5F1D|ATP5ME|BID|COX5B|ENO1|NDUFS4|PNP|PDE2A|PFKFB2|PGAM2|UQCRB|ATP5MF|DNPH1|ATP5MG|MPC2|UQCR10|NT5C|PDE12	-5.4	MyList
GO Biological Processes	19	GO:0017156	calcium ion regulated exocytosis	19_GO:0051179 localization	-7.8	10	9.5	28133	138	225	11	4.9	1.4	801|808|5582|6616|6804|8499|8541|9900|26059|80331|112755	CALM1|CALM3|PRKCG|SNAP25|STX1A|PPFIA2|PPFIA3|SV2A|ERC2|DNAJC5|STX1B	-5.4	MyList
Reactome Gene Sets	6	R-HSA-438064	Post NMDA receptor activation events		-7.8	14	11	28133	80	225	9	4	1.3	88|801|805|808|4137|5879|6714|84617|84790	ACTN2|CALM1|CALM2|CALM3|MAPT|RAC1|SRC|TUBB6|TUBA1C	-5.4	MyList
WikiPathways	27	WP3888	VEGFA-VEGFR2 Signaling Pathway		-7.8	5.2	7.9	28133	435	225	18	8	1.8	102|781|813|1465|2185|2317|2817|3146|4860|5879|5954|6714|7430|8402|8826|9588|83442|84790	ADAM10|CACNA2D1|CALU|CSRP1|PTK2B|FLNB|GPC1|HMGB1|PNP|RAC1|RCN1|SRC|EZR|SLC25A11|IQGAP1|PRDX6|SH3BGRL3|TUBA1C	-5.4	MyList
Reactome Gene Sets	6	R-HSA-9613829	Chaperone Mediated Autophagy		-7.8	34	14	28133	22	225	6	2.7	1.1	2670|6233|7311|7314|7316|10226	GFAP|RPS27A|UBA52|UBB|UBC|PLIN3	-5.4	MyList
GO Biological Processes	19	GO:1901361	organic cyclic compound catabolic process	19_GO:0008152 metabolic process	-7.7	3.9	7.3	28133	775	225	24	11	2.1	954|1854|2023|2184|2521|3146|4860|4904|5138|5208|5224|5700|5716|6133|6233|7311|7314|7316|10591|23498|30833|57819|80349|201626	ENTPD2|DUT|ENO1|FAH|FUS|HMGB1|PNP|YBX1|PDE2A|PFKFB2|PGAM2|PSMC1|PSMD10|RPL9|RPS27A|UBA52|UBB|UBC|DNPH1|HAAO|NT5C|LSM2|WDR61|PDE12	-5.3	MyList
GO Biological Processes	19	GO:0001505	regulation of neurotransmitter levels	19_GO:0065007 biological regulation	-7.7	5.9	8.1	28133	341	225	16	7.1	1.7	801|808|2185|5582|5879|6616|6623|6804|8499|8541|9900|26059|80331|112755|133121|140885	CALM1|CALM3|PTK2B|PRKCG|RAC1|SNAP25|SNCG|STX1A|PPFIA2|PPFIA3|SV2A|ERC2|DNAJC5|STX1B|ENPP6|SIRPA	-5.3	MyList
GO Biological Processes	19	GO:0002275	myeloid cell activation involved in immune response	19_GO:0002376 immune system process	-7.7	4.5	7.5	28133	550	225	20	8.9	1.9	102|210|353|1778|2950|3146|4860|5269|5478|5879|6616|8826|9588|10326|11240|23071|23406|57020|80331|140885	ADAM10|ALAD|APRT|DYNC1H1|GSTP1|HMGB1|PNP|SERPINB6|PPIA|RAC1|SNAP25|IQGAP1|PRDX6|SIRPB1|PADI2|ERP44|COTL1|VPS35L|DNAJC5|SIRPA	-5.3	MyList
GO Biological Processes	19	GO:0046700	heterocycle catabolic process	19_GO:0008152 metabolic process	-7.6	4	7.3	28133	725	225	23	10	2	954|1854|2023|2521|3146|4860|4904|5138|5208|5224|5700|5716|6133|6233|7311|7314|7316|10591|23498|30833|57819|80349|201626	ENTPD2|DUT|ENO1|FUS|HMGB1|PNP|YBX1|PDE2A|PFKFB2|PGAM2|PSMC1|PSMD10|RPL9|RPS27A|UBA52|UBB|UBC|DNPH1|HAAO|NT5C|LSM2|WDR61|PDE12	-5.2	MyList
Reactome Gene Sets	6	R-HSA-5689877	Josephin domain DUBs		-7.6	52	16	28133	12	225	5	2.2	0.98	5886|6233|7311|7314|7316	RAD23A|RPS27A|UBA52|UBB|UBC	-5.2	MyList
GO Biological Processes	19	GO:0044270	cellular nitrogen compound catabolic process	19_GO:0008152 metabolic process	-7.6	4	7.3	28133	726	225	23	10	2	954|1854|2023|2521|3146|4860|4904|5138|5208|5224|5700|5716|6133|6233|7311|7314|7316|10591|23498|30833|57819|80349|201626	ENTPD2|DUT|ENO1|FUS|HMGB1|PNP|YBX1|PDE2A|PFKFB2|PGAM2|PSMC1|PSMD10|RPL9|RPS27A|UBA52|UBB|UBC|DNPH1|HAAO|NT5C|LSM2|WDR61|PDE12	-5.2	MyList
Reactome Gene Sets	6	R-HSA-983705	Signaling by the B Cell Receptor (BCR)		-7.6	11	9.7	28133	112	225	10	4.4	1.4	801|805|808|5478|5700|5716|6233|7311|7314|7316	CALM1|CALM2|CALM3|PPIA|PSMC1|PSMD10|RPS27A|UBA52|UBB|UBC	-5.2	MyList
GO Biological Processes	19	GO:0034655	nucleobase-containing compound catabolic process	19_GO:0008152 metabolic process	-7.6	4.1	7.3	28133	671	225	22	9.8	2	954|1854|2023|2521|3146|4860|4904|5138|5208|5224|5700|5716|6133|6233|7311|7314|7316|10591|30833|57819|80349|201626	ENTPD2|DUT|ENO1|FUS|HMGB1|PNP|YBX1|PDE2A|PFKFB2|PGAM2|PSMC1|PSMD10|RPL9|RPS27A|UBA52|UBB|UBC|DNPH1|NT5C|LSM2|WDR61|PDE12	-5.2	MyList
GO Biological Processes	19	GO:0090087	regulation of peptide transport	19_GO:0051179 localization	-7.6	4.5	7.5	28133	557	225	20	8.9	1.9	291|293|2039|4035|4345|4924|5066|5208|5478|5879|6616|6714|6804|7430|7447|9647|10204|25874|29085|57506	SLC25A4|SLC25A6|DMTN|LRP1|CD200|NUCB1|PAM|PFKFB2|PPIA|RAC1|SNAP25|SRC|STX1A|EZR|VSNL1|PPM1F|NUTF2|MPC2|PHPT1|MAVS	-5.2	MyList
GO Biological Processes	19	GO:0002790	peptide secretion	19_GO:0051179 localization	-7.5	5.3	7.7	28133	404	225	17	7.6	1.8	291|293|2039|4035|4345|5066|5208|5478|5879|6616|6623|6804|7430|7447|7857|25874|29085	SLC25A4|SLC25A6|DMTN|LRP1|CD200|PAM|PFKFB2|PPIA|RAC1|SNAP25|SNCG|STX1A|EZR|VSNL1|SCG2|MPC2|PHPT1	-5.1	MyList
GO Biological Processes	19	GO:1903530	regulation of secretion by cell	19_GO:0051179 localization	-7.5	4.4	7.4	28133	565	225	20	8.9	1.9	291|293|801|808|4035|4345|5066|5208|5478|5582|5879|6616|6623|6804|7430|7447|8499|25874|29085|112755	SLC25A4|SLC25A6|CALM1|CALM3|LRP1|CD200|PAM|PFKFB2|PPIA|PRKCG|RAC1|SNAP25|SNCG|STX1A|EZR|VSNL1|PPFIA2|MPC2|PHPT1|STX1B	-5.1	MyList
GO Biological Processes	19	GO:0006091	generation of precursor metabolites and energy	19_GO:0008152 metabolic process	-7.4	4.6	7.5	28133	512	225	19	8.4	1.9	291|513|521|637|801|1329|1528|2023|3146|4724|5208|5224|7381|9551|10632|23498|29796|56898|201626	SLC25A4|ATP5F1D|ATP5ME|BID|CALM1|COX5B|CYB5A|ENO1|HMGB1|NDUFS4|PFKFB2|PGAM2|UQCRB|ATP5MF|ATP5MG|HAAO|UQCR10|BDH2|PDE12	-5.1	MyList
Reactome Gene Sets	6	R-HSA-9013507	NOTCH3 Activation and Transmission of Signal to the Nucleus		-7.4	30	13	28133	25	225	6	2.7	1.1	102|4904|6233|7311|7314|7316	ADAM10|YBX1|RPS27A|UBA52|UBB|UBC	-5.1	MyList
GO Biological Processes	19	GO:0046034	ATP metabolic process	19_GO:0008152 metabolic process	-7.4	6	8	28133	313	225	15	6.7	1.7	203|318|513|521|637|1329|2023|4724|5208|5224|7381|9551|10632|29796|201626	AK1|NUDT2|ATP5F1D|ATP5ME|BID|COX5B|ENO1|NDUFS4|PFKFB2|PGAM2|UQCRB|ATP5MF|ATP5MG|UQCR10|PDE12	-5.1	MyList
Reactome Gene Sets	6	R-HSA-9612973	Autophagy		-7.4	9.1	9	28133	151	225	11	4.9	1.4	1778|1780|2670|6233|6714|7311|7314|7316|10226|84617|84790	DYNC1H1|DYNC1I1|GFAP|RPS27A|SRC|UBA52|UBB|UBC|PLIN3|TUBB6|TUBA1C	-5.1	MyList
GO Biological Processes	19	GO:0072521	purine-containing compound metabolic process	19_GO:0008152 metabolic process	-7.4	4.2	7.2	28133	628	225	21	9.3	1.9	203|318|353|513|521|637|1329|2023|4724|4860|5138|5208|5224|7381|9551|10591|10632|25874|29796|30833|201626	AK1|NUDT2|APRT|ATP5F1D|ATP5ME|BID|COX5B|ENO1|NDUFS4|PNP|PDE2A|PFKFB2|PGAM2|UQCRB|ATP5MF|DNPH1|ATP5MG|MPC2|UQCR10|NT5C|PDE12	-5.1	MyList
GO Biological Processes	19	GO:0090109	regulation of cell-substrate junction assembly	19_GO:0071840 cellular component organization or biogenesis	-7.4	16	11	28133	64	225	8	3.6	1.2	2039|4035|5879|6714|7070|8826|9647|23499	DMTN|LRP1|RAC1|SRC|THY1|IQGAP1|PPM1F|MACF1	-5	MyList
GO Biological Processes	19	GO:0051893	regulation of focal adhesion assembly	19_GO:0022610 biological adhesion	-7.4	16	11	28133	64	225	8	3.6	1.2	2039|4035|5879|6714|7070|8826|9647|23499	DMTN|LRP1|RAC1|SRC|THY1|IQGAP1|PPM1F|MACF1	-5	MyList
GO Biological Processes	19	GO:0009141	nucleoside triphosphate metabolic process	19_GO:0008152 metabolic process	-7.3	5.4	7.7	28133	368	225	16	7.1	1.7	203|318|513|521|637|1329|1854|2023|4724|5208|5224|7381|9551|10632|29796|201626	AK1|NUDT2|ATP5F1D|ATP5ME|BID|COX5B|DUT|ENO1|NDUFS4|PFKFB2|PGAM2|UQCRB|ATP5MF|ATP5MG|UQCR10|PDE12	-4.9	MyList
GO Biological Processes	19	GO:0032386	regulation of intracellular transport	19_GO:0051179 localization	-7.2	5	7.5	28133	421	225	17	7.6	1.8	88|801|808|1778|2039|4924|5582|5936|6714|6804|7430|7905|8499|10204|23209|57506|112755	ACTN2|CALM1|CALM3|DYNC1H1|DMTN|NUCB1|PRKCG|RBM4|SRC|STX1A|EZR|REEP5|PPFIA2|NUTF2|MLC1|MAVS|STX1B	-4.9	MyList
Reactome Gene Sets	6	R-HSA-5683057	MAPK family signaling cascades		-7.2	5.8	7.8	28133	325	225	15	6.7	1.7	88|801|805|808|5700|5716|5879|6233|6714|7311|7314|7316|7450|8826|9693	ACTN2|CALM1|CALM2|CALM3|PSMC1|PSMD10|RAC1|RPS27A|SRC|UBA52|UBB|UBC|VWF|IQGAP1|RAPGEF2	-4.9	MyList
Reactome Gene Sets	6	R-HSA-5673001	RAF/MAP kinase cascade		-7.2	6.3	7.9	28133	280	225	14	6.2	1.6	88|801|805|808|5700|5716|6233|6714|7311|7314|7316|7450|8826|9693	ACTN2|CALM1|CALM2|CALM3|PSMC1|PSMD10|RPS27A|SRC|UBA52|UBB|UBC|VWF|IQGAP1|RAPGEF2	-4.9	MyList
GO Biological Processes	19	GO:1901699	cellular response to nitrogen compound	19_GO:0050896 response to stimulus	-7.1	4	7	28133	650	225	21	9.3	1.9	88|353|358|534|781|1278|2039|2875|2950|4035|4062|5138|5591|6647|6714|7430|7442|9693|57506|201626|375790	ACTN2|APRT|AQP1|ATP6V1G2|CACNA2D1|COL1A2|DMTN|GPT|GSTP1|LRP1|LY6H|PDE2A|PRKDC|SOD1|SRC|EZR|TRPV1|RAPGEF2|MAVS|PDE12|AGRN	-4.8	MyList
GO Biological Processes	19	GO:0050708	regulation of protein secretion	19_GO:0051179 localization	-7.1	6.2	7.9	28133	282	225	14	6.2	1.6	291|293|4035|4345|5066|5208|5478|5879|6616|6804|7430|7447|25874|29085	SLC25A4|SLC25A6|LRP1|CD200|PAM|PFKFB2|PPIA|RAC1|SNAP25|STX1A|EZR|VSNL1|MPC2|PHPT1	-4.8	MyList
GO Biological Processes	19	GO:0019693	ribose phosphate metabolic process	19_GO:0008152 metabolic process	-7.1	4.2	7.1	28133	594	225	20	8.9	1.9	203|318|353|513|521|637|1329|2023|4724|5138|5208|5224|7381|9551|10632|23729|25874|29796|30833|201626	AK1|NUDT2|APRT|ATP5F1D|ATP5ME|BID|COX5B|ENO1|NDUFS4|PDE2A|PFKFB2|PGAM2|UQCRB|ATP5MF|ATP5MG|SHPK|MPC2|UQCR10|NT5C|PDE12	-4.8	MyList
Reactome Gene Sets	6	R-HSA-5684996	MAPK1/MAPK3 signaling		-7.1	6.1	7.8	28133	286	225	14	6.2	1.6	88|801|805|808|5700|5716|6233|6714|7311|7314|7316|7450|8826|9693	ACTN2|CALM1|CALM2|CALM3|PSMC1|PSMD10|RPS27A|SRC|UBA52|UBB|UBC|VWF|IQGAP1|RAPGEF2	-4.8	MyList
Reactome Gene Sets	6	R-HSA-2691230	Signaling by NOTCH1 HD Domain Mutants in Cancer		-7.1	42	14	28133	15	225	5	2.2	0.98	102|6233|7311|7314|7316	ADAM10|RPS27A|UBA52|UBB|UBC	-4.8	MyList
Reactome Gene Sets	6	R-HSA-2691232	Constitutive Signaling by NOTCH1 HD Domain Mutants		-7.1	42	14	28133	15	225	5	2.2	0.98	102|6233|7311|7314|7316	ADAM10|RPS27A|UBA52|UBB|UBC	-4.8	MyList
Reactome Gene Sets	6	R-HSA-9609507	Protein localization		-7.1	8.4	8.6	28133	163	225	11	4.9	1.4	291|293|1528|6233|6804|7311|7314|7316|8239|10469|54927	SLC25A4|SLC25A6|CYB5A|RPS27A|STX1A|UBA52|UBB|UBC|USP9X|TIMM44|CHCHD3	-4.8	MyList
GO Biological Processes	19	GO:0010035	response to inorganic substance	19_GO:0050896 response to stimulus	-7	4.4	7.1	28133	543	225	19	8.4	1.9	210|358|513|801|805|808|1528|2039|2185|4137|5066|5224|6647|6714|8826|9456|23498|51596|140885	ALAD|AQP1|ATP5F1D|CALM1|CALM2|CALM3|CYB5A|DMTN|PTK2B|MAPT|PAM|PGAM2|SOD1|SRC|IQGAP1|HOMER1|HAAO|CUTA|SIRPA	-4.8	MyList
Reactome Gene Sets	6	R-HSA-1500931	Cell-Cell communication		-7	9.7	8.9	28133	129	225	10	4.4	1.4	88|1012|2185|5339|6714|8826|10326|23705|57863|140885	ACTN2|CDH13|PTK2B|PLEC|SRC|IQGAP1|SIRPB1|CADM1|CADM3|SIRPA	-4.7	MyList
Reactome Gene Sets	6	R-HSA-9619483	Activation of AMPK downstream of NMDARs		-7	26	12	28133	29	225	6	2.7	1.1	801|805|808|4137|84617|84790	CALM1|CALM2|CALM3|MAPT|TUBB6|TUBA1C	-4.7	MyList
GO Biological Processes	19	GO:0002263	cell activation involved in immune response	19_GO:0002376 immune system process	-7	3.8	6.9	28133	724	225	22	9.8	2	102|210|353|1778|2185|2950|3146|4035|4860|5269|5478|5879|6616|8826|9588|10326|11240|23071|23406|57020|80331|140885	ADAM10|ALAD|APRT|DYNC1H1|PTK2B|GSTP1|HMGB1|LRP1|PNP|SERPINB6|PPIA|RAC1|SNAP25|IQGAP1|PRDX6|SIRPB1|PADI2|ERP44|COTL1|VPS35L|DNAJC5|SIRPA	-4.7	MyList
Reactome Gene Sets	6	R-HSA-162909	Host Interactions of HIV factors		-7	9.6	8.8	28133	130	225	10	4.4	1.4	291|293|5478|5700|5716|5879|6233|7311|7314|7316	SLC25A4|SLC25A6|PPIA|PSMC1|PSMD10|RAC1|RPS27A|UBA52|UBB|UBC	-4.7	MyList
GO Biological Processes	19	GO:0051640	organelle localization	19_GO:0051179 localization	-7	3.8	6.8	28133	725	225	22	9.8	2	801|808|1778|1780|4134|4137|5582|6616|6804|7314|7430|8499|8541|8546|8943|9900|22919|26059|54732|55207|80331|112755	CALM1|CALM3|DYNC1H1|DYNC1I1|MAP4|MAPT|PRKCG|SNAP25|STX1A|UBB|EZR|PPFIA2|PPFIA3|AP3B1|AP3D1|SV2A|MAPRE1|ERC2|TMED9|ARL8B|DNAJC5|STX1B	-4.7	MyList
GO Biological Processes	19	GO:0071902	positive regulation of protein serine/threonine kinase activity	19_GO:0048518 positive regulation of biological process	-7	5.5	7.6	28133	338	225	15	6.7	1.7	801|805|808|2185|5478|5716|6233|6647|6714|7311|7314|7316|8826|9693|219771	CALM1|CALM2|CALM3|PTK2B|PPIA|PSMD10|RPS27A|SOD1|SRC|UBA52|UBB|UBC|IQGAP1|RAPGEF2|CCNY	-4.7	MyList
Reactome Gene Sets	6	R-HSA-112314	Neurotransmitter receptors and postsynaptic signal transmission		-7	7.3	8.2	28133	205	225	12	5.3	1.5	88|801|805|808|4137|5582|5879|6714|9647|26960|84617|84790	ACTN2|CALM1|CALM2|CALM3|MAPT|PRKCG|RAC1|SRC|PPM1F|NBEA|TUBB6|TUBA1C	-4.7	MyList
GO Biological Processes	19	GO:0036465	synaptic vesicle recycling	19_GO:0051179 localization	-6.9	14	9.8	28133	72	225	8	3.6	1.2	801|808|5533|6623|6804|8546|8943|112755	CALM1|CALM3|PPP3CC|SNCG|STX1A|AP3B1|AP3D1|STX1B	-4.7	MyList
GO Biological Processes	19	GO:1903391	regulation of adherens junction organization	19_GO:0071840 cellular component organization or biogenesis	-6.9	14	9.8	28133	72	225	8	3.6	1.2	2039|4035|5879|6714|7070|8826|9647|23499	DMTN|LRP1|RAC1|SRC|THY1|IQGAP1|PPM1F|MACF1	-4.7	MyList
GO Biological Processes	19	GO:0007005	mitochondrion organization	19_GO:0071840 cellular component organization or biogenesis	-6.9	4.3	7	28133	551	225	19	8.4	1.9	291|293|513|521|637|801|808|4137|4724|5138|5533|5716|8546|9551|10469|10632|54832|54927|64756	SLC25A4|SLC25A6|ATP5F1D|ATP5ME|BID|CALM1|CALM3|MAPT|NDUFS4|PDE2A|PPP3CC|PSMD10|AP3B1|ATP5MF|TIMM44|ATP5MG|VPS13C|CHCHD3|ATPAF1	-4.7	MyList
GO Biological Processes	19	GO:1901888	regulation of cell junction assembly	19_GO:0071840 cellular component organization or biogenesis	-6.9	11	9.2	28133	100	225	9	4	1.3	2039|4035|5879|6714|7070|8826|9647|9693|23499	DMTN|LRP1|RAC1|SRC|THY1|IQGAP1|PPM1F|RAPGEF2|MACF1	-4.7	MyList
Reactome Gene Sets	6	R-HSA-9012852	Signaling by NOTCH3		-6.9	18	11	28133	49	225	7	3.1	1.2	102|2173|4904|6233|7311|7314|7316	ADAM10|FABP7|YBX1|RPS27A|UBA52|UBB|UBC	-4.7	MyList
Reactome Gene Sets	6	R-HSA-8866652	Synthesis of active ubiquitin: roles of E1 and E2 enzymes		-6.9	25	12	28133	30	225	6	2.7	1.1	6233|7311|7314|7316|7347|8239	RPS27A|UBA52|UBB|UBC|UCHL3|USP9X	-4.7	MyList
KEGG Pathway	24	ko00190	Oxidative phosphorylation		-6.9	9.4	8.7	28133	133	225	10	4.4	1.4	513|521|534|1329|4724|7381|9551|10632|29796|64077	ATP5F1D|ATP5ME|ATP6V1G2|COX5B|NDUFS4|UQCRB|ATP5MF|ATP5MG|UQCR10|LHPP	-4.7	MyList
Reactome Gene Sets	6	R-HSA-1295596	Spry regulation of FGF signaling		-6.9	39	14	28133	16	225	5	2.2	0.98	6233|6714|7311|7314|7316	RPS27A|SRC|UBA52|UBB|UBC	-4.7	MyList
Reactome Gene Sets	6	R-HSA-175474	Assembly Of The HIV Virion		-6.9	39	14	28133	16	225	5	2.2	0.98	5478|6233|7311|7314|7316	PPIA|RPS27A|UBA52|UBB|UBC	-4.7	MyList
GO Biological Processes	19	GO:0009124	nucleoside monophosphate biosynthetic process	19_GO:0008152 metabolic process	-6.9	7.2	8.1	28133	208	225	12	5.3	1.5	203|318|353|513|521|1854|2023|5208|5224|9551|10632|64077	AK1|NUDT2|APRT|ATP5F1D|ATP5ME|DUT|ENO1|PFKFB2|PGAM2|ATP5MF|ATP5MG|LHPP	-4.7	MyList
GO Biological Processes	19	GO:0009205	purine ribonucleoside triphosphate metabolic process	19_GO:0008152 metabolic process	-6.9	5.5	7.5	28133	343	225	15	6.7	1.7	203|318|513|521|637|1329|2023|4724|5208|5224|7381|9551|10632|29796|201626	AK1|NUDT2|ATP5F1D|ATP5ME|BID|COX5B|ENO1|NDUFS4|PFKFB2|PGAM2|UQCRB|ATP5MF|ATP5MG|UQCR10|PDE12	-4.7	MyList
Reactome Gene Sets	6	R-HSA-2454202	Fc epsilon receptor (FCERI) signaling		-6.9	9.3	8.7	28133	134	225	10	4.4	1.4	801|805|808|5700|5716|5879|6233|7311|7314|7316	CALM1|CALM2|CALM3|PSMC1|PSMD10|RAC1|RPS27A|UBA52|UBB|UBC	-4.7	MyList
GO Biological Processes	19	GO:0072594	establishment of protein localization to organelle	19_GO:0051179 localization	-6.9	4.3	7	28133	557	225	19	8.4	1.9	293|637|801|808|4137|5533|6133|6233|6726|7311|7314|7316|8239|8546|8943|10204|10469|54832|57506	SLC25A6|BID|CALM1|CALM3|MAPT|PPP3CC|RPL9|RPS27A|SRP9|UBA52|UBB|UBC|USP9X|AP3B1|AP3D1|NUTF2|TIMM44|VPS13C|MAVS	-4.7	MyList
Reactome Gene Sets	6	R-HSA-9637628	Modulation by Mtb of host immune system		-6.9	71	17	28133	7	225	4	1.8	0.88	6233|7311|7314|7316	RPS27A|UBA52|UBB|UBC	-4.7	MyList
Reactome Gene Sets	6	R-HSA-9706377	FLT3 signaling by CBL mutants		-6.9	71	17	28133	7	225	4	1.8	0.88	6233|7311|7314|7316	RPS27A|UBA52|UBB|UBC	-4.7	MyList
GO Biological Processes	19	GO:0009150	purine ribonucleotide metabolic process	19_GO:0008152 metabolic process	-6.9	4.3	7	28133	558	225	19	8.4	1.9	203|318|353|513|521|637|1329|2023|4724|5138|5208|5224|7381|9551|10632|25874|29796|30833|201626	AK1|NUDT2|APRT|ATP5F1D|ATP5ME|BID|COX5B|ENO1|NDUFS4|PDE2A|PFKFB2|PGAM2|UQCRB|ATP5MF|ATP5MG|MPC2|UQCR10|NT5C|PDE12	-4.6	MyList
Reactome Gene Sets	6	R-HSA-1632852	Macroautophagy		-6.8	9.2	8.6	28133	136	225	10	4.4	1.4	1778|1780|6233|6714|7311|7314|7316|10226|84617|84790	DYNC1H1|DYNC1I1|RPS27A|SRC|UBA52|UBB|UBC|PLIN3|TUBB6|TUBA1C	-4.6	MyList
GO Biological Processes	19	GO:0009144	purine nucleoside triphosphate metabolic process	19_GO:0008152 metabolic process	-6.8	5.4	7.4	28133	349	225	15	6.7	1.7	203|318|513|521|637|1329|2023|4724|5208|5224|7381|9551|10632|29796|201626	AK1|NUDT2|ATP5F1D|ATP5ME|BID|COX5B|ENO1|NDUFS4|PFKFB2|PGAM2|UQCRB|ATP5MF|ATP5MG|UQCR10|PDE12	-4.6	MyList
GO Biological Processes	19	GO:0009199	ribonucleoside triphosphate metabolic process	19_GO:0008152 metabolic process	-6.8	5.4	7.4	28133	350	225	15	6.7	1.7	203|318|513|521|637|1329|2023|4724|5208|5224|7381|9551|10632|29796|201626	AK1|NUDT2|ATP5F1D|ATP5ME|BID|COX5B|ENO1|NDUFS4|PFKFB2|PGAM2|UQCRB|ATP5MF|ATP5MG|UQCR10|PDE12	-4.6	MyList
GO Biological Processes	19	GO:0090150	establishment of protein localization to membrane	19_GO:0051179 localization	-6.7	5.3	7.3	28133	356	225	15	6.7	1.7	637|801|808|2039|5533|6133|6233|6616|6726|7311|8546|23499|26003|27342|112755	BID|CALM1|CALM3|DMTN|PPP3CC|RPL9|RPS27A|SNAP25|SRP9|UBA52|AP3B1|MACF1|GORASP2|RABGEF1|STX1B	-4.5	MyList
Reactome Gene Sets	6	R-HSA-1280218	Adaptive Immune System		-6.7	3.6	6.6	28133	756	225	22	9.8	2	801|805|808|1211|1278|1778|1780|4345|5478|5700|5716|5879|6233|6714|7087|7311|7314|7316|10384|55740|84617|84790	CALM1|CALM2|CALM3|CLTA|COL1A2|DYNC1H1|DYNC1I1|CD200|PPIA|PSMC1|PSMD10|RAC1|RPS27A|SRC|ICAM5|UBA52|UBB|UBC|BTN3A3|ENAH|TUBB6|TUBA1C	-4.5	MyList
Reactome Gene Sets	6	R-HSA-376176	Signaling by ROBO receptors		-6.7	6.9	7.8	28133	218	225	12	5.3	1.5	2817|5217|5700|5716|5879|6133|6233|6714|7311|7314|7316|55740	GPC1|PFN2|PSMC1|PSMD10|RAC1|RPL9|RPS27A|SRC|UBA52|UBB|UBC|ENAH	-4.5	MyList
Reactome Gene Sets	6	R-HSA-109581	Apoptosis		-6.7	7.7	8.1	28133	178	225	11	4.9	1.4	637|3146|4137|5339|5533|5700|5716|6233|7311|7314|7316	BID|HMGB1|MAPT|PLEC|PPP3CC|PSMC1|PSMD10|RPS27A|UBA52|UBB|UBC	-4.5	MyList
GO Biological Processes	19	GO:0006836	neurotransmitter transport	19_GO:0051179 localization	-6.7	6.2	7.6	28133	262	225	13	5.8	1.6	358|801|808|5582|6616|6623|6804|8499|8541|9900|26059|80331|112755	AQP1|CALM1|CALM3|PRKCG|SNAP25|SNCG|STX1A|PPFIA2|PPFIA3|SV2A|ERC2|DNAJC5|STX1B	-4.5	MyList
GO Biological Processes	19	GO:0009259	ribonucleotide metabolic process	19_GO:0008152 metabolic process	-6.7	4.1	6.8	28133	575	225	19	8.4	1.9	203|318|353|513|521|637|1329|2023|4724|5138|5208|5224|7381|9551|10632|25874|29796|30833|201626	AK1|NUDT2|APRT|ATP5F1D|ATP5ME|BID|COX5B|ENO1|NDUFS4|PDE2A|PFKFB2|PGAM2|UQCRB|ATP5MF|ATP5MG|MPC2|UQCR10|NT5C|PDE12	-4.5	MyList
Reactome Gene Sets	6	R-HSA-445989	TAK1 activates NFkB by phosphorylation and activation of IKKs complex		-6.6	23	11	28133	33	225	6	2.7	1.1	3146|6233|6285|7311|7314|7316	HMGB1|RPS27A|S100B|UBA52|UBB|UBC	-4.5	MyList
Reactome Gene Sets	6	R-HSA-5621481	C-type lectin receptors (CLRs)		-6.6	8.8	8.4	28133	142	225	10	4.4	1.4	801|805|808|5700|5716|6233|6714|7311|7314|7316	CALM1|CALM2|CALM3|PSMC1|PSMD10|RPS27A|SRC|UBA52|UBB|UBC	-4.5	MyList
Reactome Gene Sets	6	R-HSA-8852135	Protein ubiquitination		-6.6	13	9.3	28133	79	225	8	3.6	1.2	5591|6233|7311|7314|7316|7347|8239|80349	PRKDC|RPS27A|UBA52|UBB|UBC|UCHL3|USP9X|WDR61	-4.5	MyList
GO Biological Processes	19	GO:0031589	cell-substrate adhesion	19_GO:0022610 biological adhesion	-6.6	5.2	7.2	28133	360	225	15	6.7	1.7	88|1012|2039|2185|3696|4035|5879|6714|7070|7402|7450|8499|8826|9647|23499	ACTN2|CDH13|DMTN|PTK2B|ITGB8|LRP1|RAC1|SRC|THY1|UTRN|VWF|PPFIA2|IQGAP1|PPM1F|MACF1	-4.4	MyList
GO Biological Processes	19	GO:0002791	regulation of peptide secretion	19_GO:0051179 localization	-6.6	5.6	7.4	28133	311	225	14	6.2	1.6	291|293|4035|4345|5066|5208|5478|5879|6616|6804|7430|7447|25874|29085	SLC25A4|SLC25A6|LRP1|CD200|PAM|PFKFB2|PPIA|RAC1|SNAP25|STX1A|EZR|VSNL1|MPC2|PHPT1	-4.4	MyList
GO Biological Processes	19	GO:0001954	positive regulation of cell-matrix adhesion	19_GO:0022610 biological adhesion	-6.6	16	10	28133	54	225	7	3.1	1.2	1012|2185|5879|7070|7402|8826|9647	CDH13|PTK2B|RAC1|THY1|UTRN|IQGAP1|PPM1F	-4.4	MyList
GO Biological Processes	19	GO:0007006	mitochondrial membrane organization	19_GO:0071840 cellular component organization or biogenesis	-6.6	8.7	8.3	28133	144	225	10	4.4	1.4	513|521|637|801|808|5533|8546|9551|10632|54927	ATP5F1D|ATP5ME|BID|CALM1|CALM3|PPP3CC|AP3B1|ATP5MF|ATP5MG|CHCHD3	-4.4	MyList
Reactome Gene Sets	6	R-HSA-8941858	Regulation of RUNX3 expression and activity		-6.6	16	9.9	28133	55	225	7	3.1	1.2	5700|5716|6233|6714|7311|7314|7316	PSMC1|PSMD10|RPS27A|SRC|UBA52|UBB|UBC	-4.4	MyList
GO Biological Processes	19	GO:0050804	modulation of chemical synaptic transmission	19_GO:0023052 signaling	-6.5	4.8	7	28133	418	225	16	7.1	1.7	801|808|2185|4137|4884|5582|6616|6623|6714|6804|7143|8499|8541|9456|9693|112755	CALM1|CALM3|PTK2B|MAPT|NPTX1|PRKCG|SNAP25|SNCG|SRC|STX1A|TNR|PPFIA2|PPFIA3|HOMER1|RAPGEF2|STX1B	-4.4	MyList
GO Biological Processes	19	GO:0099177	regulation of trans-synaptic signaling	19_GO:0023052 signaling	-6.5	4.8	7	28133	419	225	16	7.1	1.7	801|808|2185|4137|4884|5582|6616|6623|6714|6804|7143|8499|8541|9456|9693|112755	CALM1|CALM3|PTK2B|MAPT|NPTX1|PRKCG|SNAP25|SNCG|SRC|STX1A|TNR|PPFIA2|PPFIA3|HOMER1|RAPGEF2|STX1B	-4.4	MyList
GO Biological Processes	19	GO:0016082	synaptic vesicle priming	19_GO:0023052 signaling	-6.5	33	12	28133	19	225	5	2.2	0.98	6616|6804|9900|26059|112755	SNAP25|STX1A|SV2A|ERC2|STX1B	-4.3	MyList
GO Biological Processes	19	GO:0006119	oxidative phosphorylation	19_GO:0008152 metabolic process	-6.5	8.4	8.2	28133	148	225	10	4.4	1.4	513|521|637|1329|4724|7381|9551|10632|29796|201626	ATP5F1D|ATP5ME|BID|COX5B|NDUFS4|UQCRB|ATP5MF|ATP5MG|UQCR10|PDE12	-4.3	MyList
GO Biological Processes	19	GO:0009168	purine ribonucleoside monophosphate biosynthetic process	19_GO:0008152 metabolic process	-6.4	7.4	7.8	28133	187	225	11	4.9	1.4	203|318|353|513|521|2023|5208|5224|9551|10632|64077	AK1|NUDT2|APRT|ATP5F1D|ATP5ME|ENO1|PFKFB2|PGAM2|ATP5MF|ATP5MG|LHPP	-4.3	MyList
GO Biological Processes	19	GO:0009127	purine nucleoside monophosphate biosynthetic process	19_GO:0008152 metabolic process	-6.4	7.3	7.8	28133	188	225	11	4.9	1.4	203|318|353|513|521|2023|5208|5224|9551|10632|64077	AK1|NUDT2|APRT|ATP5F1D|ATP5ME|ENO1|PFKFB2|PGAM2|ATP5MF|ATP5MG|LHPP	-4.3	MyList
GO Biological Processes	19	GO:0002366	leukocyte activation involved in immune response	19_GO:0002376 immune system process	-6.4	3.6	6.5	28133	720	225	21	9.3	1.9	102|210|353|1778|2185|2950|3146|4860|5269|5478|5879|6616|8826|9588|10326|11240|23071|23406|57020|80331|140885	ADAM10|ALAD|APRT|DYNC1H1|PTK2B|GSTP1|HMGB1|PNP|SERPINB6|PPIA|RAC1|SNAP25|IQGAP1|PRDX6|SIRPB1|PADI2|ERP44|COTL1|VPS35L|DNAJC5|SIRPA	-4.3	MyList
Reactome Gene Sets	6	R-HSA-1236394	Signaling by ERBB4		-6.4	15	9.6	28133	58	225	7	3.1	1.2	2670|6233|6285|6714|7311|7314|7316	GFAP|RPS27A|S100B|SRC|UBA52|UBB|UBC	-4.3	MyList
GO Biological Processes	19	GO:0031102	neuron projection regeneration	19_GO:0032502 developmental process	-6.4	15	9.6	28133	58	225	7	3.1	1.2	2596|3371|4035|4974|7070|7143|10752	GAP43|TNC|LRP1|OMG|THY1|TNR|CHL1	-4.3	MyList
Reactome Gene Sets	6	R-HSA-5357801	Programmed Cell Death		-6.4	7.2	7.7	28133	190	225	11	4.9	1.4	637|3146|4137|5339|5533|5700|5716|6233|7311|7314|7316	BID|HMGB1|MAPT|PLEC|PPP3CC|PSMC1|PSMD10|RPS27A|UBA52|UBB|UBC	-4.2	MyList
Reactome Gene Sets	6	R-HSA-2467813	Separation of Sister Chromatids		-6.4	7.2	7.7	28133	191	225	11	4.9	1.4	1778|1780|5700|5716|6233|7311|7314|7316|22919|84617|84790	DYNC1H1|DYNC1I1|PSMC1|PSMD10|RPS27A|UBA52|UBB|UBC|MAPRE1|TUBB6|TUBA1C	-4.2	MyList
Reactome Gene Sets	6	R-HSA-8876384	Listeria monocytogenes entry into host cells		-6.4	31	12	28133	20	225	5	2.2	0.98	6233|6714|7311|7314|7316	RPS27A|SRC|UBA52|UBB|UBC	-4.2	MyList
Reactome Gene Sets	6	R-HSA-195258	RHO GTPase Effectors		-6.4	5.4	7.1	28133	327	225	14	6.2	1.6	801|805|808|1778|1780|4637|5217|5879|6714|8359|8826|22919|84617|84790	CALM1|CALM2|CALM3|DYNC1H1|DYNC1I1|MYL6|PFN2|RAC1|SRC|H4C1|IQGAP1|MAPRE1|TUBB6|TUBA1C	-4.2	MyList
Reactome Gene Sets	6	R-HSA-9619229	Activation of RAC1 downstream of NMDARs		-6.3	56	15	28133	9	225	4	1.8	0.88	801|805|808|5879	CALM1|CALM2|CALM3|RAC1	-4.2	MyList
Reactome Gene Sets	6	R-HSA-9636383	Prevention of phagosomal-lysosomal fusion		-6.3	56	15	28133	9	225	4	1.8	0.88	6233|7311|7314|7316	RPS27A|UBA52|UBB|UBC	-4.2	MyList
Reactome Gene Sets	6	R-HSA-8849469	PTK6 Regulates RTKs and Their Effectors AKT1 and DOK1		-6.3	56	15	28133	9	225	4	1.8	0.88	6233|7311|7314|7316	RPS27A|UBA52|UBB|UBC	-4.2	MyList
Reactome Gene Sets	6	R-HSA-3785653	Myoclonic epilepsy of Lafora		-6.3	56	15	28133	9	225	4	1.8	0.88	6233|7311|7314|7316	RPS27A|UBA52|UBB|UBC	-4.2	MyList
Reactome Gene Sets	6	R-HSA-8948747	Regulation of PTEN localization		-6.3	56	15	28133	9	225	4	1.8	0.88	6233|7311|7314|7316	RPS27A|UBA52|UBB|UBC	-4.2	MyList
Reactome Gene Sets	6	R-HSA-5250971	Toxicity of botulinum toxin type C (botC)		-6.3	1.3e+02	19	28133	3	225	3	1.3	0.76	6616|6804|112755	SNAP25|STX1A|STX1B	-4.2	MyList
Reactome Gene Sets	6	R-HSA-373760	L1CAM interactions		-6.3	9.5	8.3	28133	119	225	9	4	1.3	214|1211|2596|5879|6714|7430|10752|84617|84790	ALCAM|CLTA|GAP43|RAC1|SRC|EZR|CHL1|TUBB6|TUBA1C	-4.2	MyList
GO Biological Processes	19	GO:0030155	regulation of cell adhesion	19_GO:0022610 biological adhesion	-6.3	3.6	6.4	28133	734	225	21	9.3	1.9	102|1012|2039|2185|3146|3371|4035|4860|5361|5879|6714|7070|7143|7402|8546|8826|8943|9647|10326|23499|140885	ADAM10|CDH13|DMTN|PTK2B|HMGB1|TNC|LRP1|PNP|PLXNA1|RAC1|SRC|THY1|TNR|UTRN|AP3B1|IQGAP1|AP3D1|PPM1F|SIRPB1|MACF1|SIRPA	-4.2	MyList
Reactome Gene Sets	6	R-HSA-195721	Signaling by WNT		-6.3	5.3	7	28133	332	225	14	6.2	1.6	801|805|808|1211|1212|5582|5700|5716|5879|6233|7311|7314|7316|8359	CALM1|CALM2|CALM3|CLTA|CLTB|PRKCG|PSMC1|PSMD10|RAC1|RPS27A|UBA52|UBB|UBC|H4C1	-4.2	MyList
GO Biological Processes	19	GO:1901293	nucleoside phosphate biosynthetic process	19_GO:0008152 metabolic process	-6.2	4.8	6.8	28133	387	225	15	6.7	1.7	203|318|353|513|521|1854|2023|4860|5208|5224|9551|10632|23498|25874|64077	AK1|NUDT2|APRT|ATP5F1D|ATP5ME|DUT|ENO1|PNP|PFKFB2|PGAM2|ATP5MF|ATP5MG|HAAO|MPC2|LHPP	-4.1	MyList
GO Biological Processes	19	GO:0006605	protein targeting	19_GO:0051179 localization	-6.2	4.5	6.7	28133	442	225	16	7.1	1.7	293|637|2039|4924|6133|6233|6726|7311|7314|7316|8239|8546|8943|10469|27342|54832	SLC25A6|BID|DMTN|NUCB1|RPL9|RPS27A|SRP9|UBA52|UBB|UBC|USP9X|AP3B1|AP3D1|TIMM44|RABGEF1|VPS13C	-4.1	MyList
Reactome Gene Sets	6	R-HSA-109582	Hemostasis		-6.2	3.8	6.4	28133	620	225	19	8.4	1.9	88|801|805|808|813|1278|2817|5138|5269|5478|5582|5879|6520|6647|6714|7450|84617|84790|140885	ACTN2|CALM1|CALM2|CALM3|CALU|COL1A2|GPC1|PDE2A|SERPINB6|PPIA|PRKCG|RAC1|SLC3A2|SOD1|SRC|VWF|TUBB6|TUBA1C|SIRPA	-4.1	MyList
GO Biological Processes	19	GO:0009156	ribonucleoside monophosphate biosynthetic process	19_GO:0008152 metabolic process	-6.2	6.9	7.5	28133	200	225	11	4.9	1.4	203|318|353|513|521|2023|5208|5224|9551|10632|64077	AK1|NUDT2|APRT|ATP5F1D|ATP5ME|ENO1|PFKFB2|PGAM2|ATP5MF|ATP5MG|LHPP	-4.1	MyList
GO Biological Processes	19	GO:0016197	endosomal transport	19_GO:0051179 localization	-6.1	6.1	7.3	28133	244	225	12	5.3	1.5	88|400|6233|7311|7314|7316|8546|8943|23325|54732|55207|57020	ACTN2|ARL1|RPS27A|UBA52|UBB|UBC|AP3B1|AP3D1|WASHC4|TMED9|ARL8B|VPS35L	-4.1	MyList
GO Biological Processes	19	GO:0098916	anterograde trans-synaptic signaling	19_GO:0023052 signaling	-6.1	3.7	6.3	28133	684	225	20	8.9	1.9	801|808|2185|4137|4884|5582|6616|6623|6714|6804|7143|7442|8499|8541|9456|9693|9900|26059|80331|112755	CALM1|CALM3|PTK2B|MAPT|NPTX1|PRKCG|SNAP25|SNCG|SRC|STX1A|TNR|TRPV1|PPFIA2|PPFIA3|HOMER1|RAPGEF2|SV2A|ERC2|DNAJC5|STX1B	-4.1	MyList
GO Biological Processes	19	GO:0007268	chemical synaptic transmission	19_GO:0023052 signaling	-6.1	3.7	6.3	28133	684	225	20	8.9	1.9	801|808|2185|4137|4884|5582|6616|6623|6714|6804|7143|7442|8499|8541|9456|9693|9900|26059|80331|112755	CALM1|CALM3|PTK2B|MAPT|NPTX1|PRKCG|SNAP25|SNCG|SRC|STX1A|TNR|TRPV1|PPFIA2|PPFIA3|HOMER1|RAPGEF2|SV2A|ERC2|DNAJC5|STX1B	-4.1	MyList
Reactome Gene Sets	6	R-HSA-2979096	NOTCH2 Activation and Transmission of Signal to the Nucleus		-6.1	28	12	28133	22	225	5	2.2	0.98	102|6233|7311|7314|7316	ADAM10|RPS27A|UBA52|UBB|UBC	-4	MyList
Reactome Gene Sets	6	R-HSA-9617324	Negative regulation of NMDA receptor-mediated neuronal transmission		-6.1	28	12	28133	22	225	5	2.2	0.98	88|801|805|808|9647	ACTN2|CALM1|CALM2|CALM3|PPM1F	-4	MyList
Reactome Gene Sets	6	R-HSA-5663202	Diseases of signal transduction by growth factor receptors and second messengers		-6.1	4.7	6.7	28133	395	225	15	6.7	1.7	102|801|805|808|5700|5716|5879|6233|6714|7311|7314|7316|7450|8546|8826	ADAM10|CALM1|CALM2|CALM3|PSMC1|PSMD10|RAC1|RPS27A|SRC|UBA52|UBB|UBC|VWF|AP3B1|IQGAP1	-4	MyList
Reactome Gene Sets	6	R-HSA-937042	IRAK2 mediated activation of TAK1 complex		-6.1	50	14	28133	10	225	4	1.8	0.88	6233|7311|7314|7316	RPS27A|UBA52|UBB|UBC	-4	MyList
Reactome Gene Sets	6	R-HSA-168799	Neurotoxicity of clostridium toxins		-6.1	50	14	28133	10	225	4	1.8	0.88	6616|6804|9900|112755	SNAP25|STX1A|SV2A|STX1B	-4	MyList
GO Biological Processes	19	GO:0099537	trans-synaptic signaling	19_GO:0023052 signaling	-6.1	3.6	6.3	28133	691	225	20	8.9	1.9	801|808|2185|4137|4884|5582|6616|6623|6714|6804|7143|7442|8499|8541|9456|9693|9900|26059|80331|112755	CALM1|CALM3|PTK2B|MAPT|NPTX1|PRKCG|SNAP25|SNCG|SRC|STX1A|TNR|TRPV1|PPFIA2|PPFIA3|HOMER1|RAPGEF2|SV2A|ERC2|DNAJC5|STX1B	-4	MyList
GO Biological Processes	19	GO:0098662	inorganic cation transmembrane transport	19_GO:0051179 localization	-6.1	3.5	6.2	28133	757	225	21	9.3	1.9	88|358|513|521|534|781|801|805|808|1528|1804|2185|5250|6520|6616|7070|7402|7442|9551|10632|53826	ACTN2|AQP1|ATP5F1D|ATP5ME|ATP6V1G2|CACNA2D1|CALM1|CALM2|CALM3|CYB5A|DPP6|PTK2B|SLC25A3|SLC3A2|SNAP25|THY1|UTRN|TRPV1|ATP5MF|ATP5MG|FXYD6	-4	MyList
KEGG Pathway	24	hsa04020	Calcium signaling pathway		-6	6.7	7.3	28133	206	225	11	4.9	1.4	291|293|801|805|808|2185|5333|5533|5582|113026|114787	SLC25A4|SLC25A6|CALM1|CALM2|CALM3|PTK2B|PLCD1|PPP3CC|PRKCG|PLCD3|GPRIN1	-4	MyList
Reactome Gene Sets	6	R-HSA-9637690	Response of Mtb to phagocytosis		-6	27	11	28133	23	225	5	2.2	0.98	2023|6233|7311|7314|7316	ENO1|RPS27A|UBA52|UBB|UBC	-4	MyList
Reactome Gene Sets	6	R-HSA-2173795	Downregulation of SMAD2/3:SMAD4 transcriptional activity		-6	27	11	28133	23	225	5	2.2	0.98	6233|7311|7314|7316|8239	RPS27A|UBA52|UBB|UBC|USP9X	-4	MyList
GO Biological Processes	19	GO:0080135	regulation of cellular response to stress	19_GO:0050896 response to stimulus	-6	3.5	6.2	28133	761	225	21	9.3	1.9	637|2023|2185|2521|2950|3146|4035|4137|4904|5478|5582|5591|5716|6647|7070|7143|7430|29978|51060|54832|140885	BID|ENO1|PTK2B|FUS|GSTP1|HMGB1|LRP1|MAPT|YBX1|PPIA|PRKCG|PRKDC|PSMD10|SOD1|THY1|TNR|EZR|UBQLN2|TXNDC12|VPS13C|SIRPA	-4	MyList
Reactome Gene Sets	6	R-HSA-1592230	Mitochondrial biogenesis		-6	11	8.4	28133	95	225	8	3.6	1.2	513|521|801|805|808|9551|10632|54927	ATP5F1D|ATP5ME|CALM1|CALM2|CALM3|ATP5MF|ATP5MG|CHCHD3	-3.9	MyList
GO Biological Processes	19	GO:0010769	regulation of cell morphogenesis involved in differentiation	19_GO:0032502 developmental process	-6	5.4	6.9	28133	300	225	13	5.8	1.6	102|2039|4035|4137|4974|5361|5591|5879|7070|7143|8499|9693|23499	ADAM10|DMTN|LRP1|MAPT|OMG|PLXNA1|PRKDC|RAC1|THY1|TNR|PPFIA2|RAPGEF2|MACF1	-3.9	MyList
GO Biological Processes	19	GO:0099536	synaptic signaling	19_GO:0023052 signaling	-6	3.6	6.2	28133	700	225	20	8.9	1.9	801|808|2185|4137|4884|5582|6616|6623|6714|6804|7143|7442|8499|8541|9456|9693|9900|26059|80331|112755	CALM1|CALM3|PTK2B|MAPT|NPTX1|PRKCG|SNAP25|SNCG|SRC|STX1A|TNR|TRPV1|PPFIA2|PPFIA3|HOMER1|RAPGEF2|SV2A|ERC2|DNAJC5|STX1B	-3.9	MyList
GO Biological Processes	19	GO:0045927	positive regulation of growth	19_GO:0040007 growth	-6	5.9	7.1	28133	253	225	12	5.3	1.5	102|2185|4035|4137|5591|5716|7430|9647|10409|10591|23499|375790	ADAM10|PTK2B|LRP1|MAPT|PRKDC|PSMD10|EZR|PPM1F|BASP1|DNPH1|MACF1|AGRN	-3.9	MyList
KEGG Pathway	24	hsa00190	Oxidative phosphorylation		-6	7.5	7.5	28133	167	225	10	4.4	1.4	513|521|534|1329|4724|7381|9551|10632|29796|64077	ATP5F1D|ATP5ME|ATP6V1G2|COX5B|NDUFS4|UQCRB|ATP5MF|ATP5MG|UQCR10|LHPP	-3.9	MyList
GO Biological Processes	19	GO:0098693	regulation of synaptic vesicle cycle	19_GO:0051179 localization	-6	10	8.3	28133	96	225	8	3.6	1.2	801|808|5533|5582|6804|8499|80331|112755	CALM1|CALM3|PPP3CC|PRKCG|STX1A|PPFIA2|DNAJC5|STX1B	-3.9	MyList
Reactome Gene Sets	6	R-HSA-6802952	Signaling by BRAF and RAF fusions		-6	13	8.9	28133	67	225	7	3.1	1.2	801|805|808|6714|7450|8546|8826	CALM1|CALM2|CALM3|SRC|VWF|AP3B1|IQGAP1	-3.9	MyList
GO Biological Processes	19	GO:0046683	response to organophosphorus	19_GO:0050896 response to stimulus	-5.9	8.6	7.8	28133	131	225	9	4	1.3	358|2039|2185|4724|5138|6647|7430|7442|9693	AQP1|DMTN|PTK2B|NDUFS4|PDE2A|SOD1|EZR|TRPV1|RAPGEF2	-3.9	MyList
GO Biological Processes	19	GO:0071900	regulation of protein serine/threonine kinase activity	19_GO:0050789 regulation of biological process	-5.9	4.1	6.4	28133	521	225	17	7.6	1.8	801|805|808|2185|2950|5478|5716|6233|6647|6714|7070|7311|7314|7316|8826|9693|219771	CALM1|CALM2|CALM3|PTK2B|GSTP1|PPIA|PSMD10|RPS27A|SOD1|SRC|THY1|UBA52|UBB|UBC|IQGAP1|RAPGEF2|CCNY	-3.9	MyList
Reactome Gene Sets	6	R-HSA-9656223	Signaling by RAF1 mutants		-5.9	17	9.7	28133	43	225	6	2.7	1.1	801|805|808|6714|7450|8826	CALM1|CALM2|CALM3|SRC|VWF|IQGAP1	-3.9	MyList
GO Biological Processes	19	GO:0021762	substantia nigra development	19_GO:0032502 developmental process	-5.9	17	9.7	28133	43	225	6	2.7	1.1	801|805|808|6271|10409|11240	CALM1|CALM2|CALM3|S100A1|BASP1|PADI2	-3.9	MyList
Reactome Gene Sets	6	R-HSA-5627123	RHO GTPases activate PAKs		-5.9	26	11	28133	24	225	5	2.2	0.98	801|805|808|4637|5879	CALM1|CALM2|CALM3|MYL6|RAC1	-3.9	MyList
Reactome Gene Sets	6	R-HSA-9620244	Long-term potentiation		-5.9	26	11	28133	24	225	5	2.2	0.98	88|801|805|808|6714	ACTN2|CALM1|CALM2|CALM3|SRC	-3.9	MyList
Reactome Gene Sets	6	R-HSA-9664873	Pexophagy		-5.9	45	13	28133	11	225	4	1.8	0.88	6233|7311|7314|7316	RPS27A|UBA52|UBB|UBC	-3.9	MyList
Reactome Gene Sets	6	R-HSA-2025928	Calcineurin activates NFAT		-5.9	45	13	28133	11	225	4	1.8	0.88	801|805|808|5478	CALM1|CALM2|CALM3|PPIA	-3.9	MyList
Reactome Gene Sets	6	R-HSA-9014325	TICAM1,TRAF6-dependent induction of TAK1 complex		-5.9	45	13	28133	11	225	4	1.8	0.88	6233|7311|7314|7316	RPS27A|UBA52|UBB|UBC	-3.9	MyList
Reactome Gene Sets	6	R-HSA-9645460	Alpha-protein kinase 1 signaling pathway		-5.9	45	13	28133	11	225	4	1.8	0.88	6233|7311|7314|7316	RPS27A|UBA52|UBB|UBC	-3.9	MyList
GO Biological Processes	19	GO:0016081	synaptic vesicle docking	19_GO:0023052 signaling	-5.9	45	13	28133	11	225	4	1.8	0.88	6616|6804|8541|112755	SNAP25|STX1A|PPFIA3|STX1B	-3.9	MyList
GO Biological Processes	19	GO:0034329	cell junction assembly	19_GO:0071840 cellular component organization or biogenesis	-5.9	5.8	7	28133	259	225	12	5.3	1.5	88|2039|2185|4035|5339|5879|6714|7070|8826|9647|9693|23499	ACTN2|DMTN|PTK2B|LRP1|PLEC|RAC1|SRC|THY1|IQGAP1|PPM1F|RAPGEF2|MACF1	-3.9	MyList
Reactome Gene Sets	6	R-HSA-76005	Response to elevated platelet cytosolic Ca2+		-5.9	8.4	7.7	28133	134	225	9	4	1.3	88|801|805|808|813|5478|5582|6647|7450	ACTN2|CALM1|CALM2|CALM3|CALU|PPIA|PRKCG|SOD1|VWF	-3.8	MyList
Reactome Gene Sets	6	R-HSA-9006925	Intracellular signaling by second messengers		-5.9	5.3	6.8	28133	309	225	13	5.8	1.6	801|805|808|5582|5700|5716|5879|6233|6714|7311|7314|7316|26960	CALM1|CALM2|CALM3|PRKCG|PSMC1|PSMD10|RAC1|RPS27A|SRC|UBA52|UBB|UBC|NBEA	-3.8	MyList
Reactome Gene Sets	6	R-HSA-76002	Platelet activation, signaling and aggregation		-5.8	5.7	6.9	28133	263	225	12	5.3	1.5	88|801|805|808|813|1278|5478|5582|5879|6647|6714|7450	ACTN2|CALM1|CALM2|CALM3|CALU|COL1A2|PPIA|PRKCG|RAC1|SOD1|SRC|VWF	-3.8	MyList
Reactome Gene Sets	6	R-HSA-15869	Metabolism of nucleotides		-5.8	9.9	8	28133	101	225	8	3.6	1.2	203|353|954|1854|4860|10591|30833|64077	AK1|APRT|ENTPD2|DUT|PNP|DNPH1|NT5C|LHPP	-3.8	MyList
GO Biological Processes	19	GO:0010810	regulation of cell-substrate adhesion	19_GO:0022610 biological adhesion	-5.8	6.3	7.1	28133	218	225	11	4.9	1.4	1012|2039|2185|4035|5879|6714|7070|7402|8826|9647|23499	CDH13|DMTN|PTK2B|LRP1|RAC1|SRC|THY1|UTRN|IQGAP1|PPM1F|MACF1	-3.8	MyList
KEGG Pathway	24	hsa05031	Amphetamine addiction		-5.8	12	8.6	28133	71	225	7	3.1	1.2	801|805|808|5533|5582|6804|114787	CALM1|CALM2|CALM3|PPP3CC|PRKCG|STX1A|GPRIN1	-3.8	MyList
GO Biological Processes	19	GO:0030029	actin filament-based process	19_GO:0009987 cellular process	-5.8	3.3	6	28133	789	225	21	9.3	1.9	88|358|781|822|1465|2039|2185|2317|4035|4637|5066|5217|5879|6714|7171|7430|8826|9647|23406|29085|55740	ACTN2|AQP1|CACNA2D1|CAPG|CSRP1|DMTN|PTK2B|FLNB|LRP1|MYL6|PAM|PFN2|RAC1|SRC|TPM4|EZR|IQGAP1|PPM1F|COTL1|PHPT1|ENAH	-3.8	MyList
Reactome Gene Sets	6	R-HSA-8953897	Cellular responses to external stimuli		-5.8	3.8	6.1	28133	598	225	18	8	1.8	318|534|1465|1778|1780|2950|5700|5716|6133|6233|6647|7311|7314|7316|8359|9588|84617|84790	NUDT2|ATP6V1G2|CSRP1|DYNC1H1|DYNC1I1|GSTP1|PSMC1|PSMD10|RPL9|RPS27A|SOD1|UBA52|UBB|UBC|H4C1|PRDX6|TUBB6|TUBA1C	-3.7	MyList
Reactome Gene Sets	6	R-HSA-9020702	Interleukin-1 signaling		-5.7	9.7	8	28133	103	225	8	3.6	1.2	3146|5700|5716|6233|6285|7311|7314|7316	HMGB1|PSMC1|PSMD10|RPS27A|S100B|UBA52|UBB|UBC	-3.7	MyList
GO Biological Processes	19	GO:0050796	regulation of insulin secretion	19_GO:0023052 signaling	-5.7	7	7.2	28133	178	225	10	4.4	1.4	291|293|4035|5208|5879|6616|6804|7447|25874|29085	SLC25A4|SLC25A6|LRP1|PFKFB2|RAC1|SNAP25|STX1A|VSNL1|MPC2|PHPT1	-3.7	MyList
Reactome Gene Sets	6	R-HSA-9013973	TICAM1-dependent activation of IRF3/IRF7		-5.7	42	13	28133	12	225	4	1.8	0.88	6233|7311|7314|7316	RPS27A|UBA52|UBB|UBC	-3.7	MyList
KEGG Pathway	24	hsa05016	Huntington disease		-5.7	6.2	7	28133	222	225	11	4.9	1.4	291|293|513|1211|1212|1329|4724|6647|7381|29796|114787	SLC25A4|SLC25A6|ATP5F1D|CLTA|CLTB|COX5B|NDUFS4|SOD1|UQCRB|UQCR10|GPRIN1	-3.7	MyList
GO Biological Processes	19	GO:0045785	positive regulation of cell adhesion	19_GO:0022610 biological adhesion	-5.7	4.4	6.4	28133	425	225	15	6.7	1.7	1012|2039|2185|3146|4860|5879|6714|7070|7402|8546|8826|8943|9647|10326|140885	CDH13|DMTN|PTK2B|HMGB1|PNP|RAC1|SRC|THY1|UTRN|AP3B1|IQGAP1|AP3D1|PPM1F|SIRPB1|SIRPA	-3.7	MyList
Reactome Gene Sets	6	R-HSA-6802955	Paradoxical activation of RAF signaling by kinase inactive BRAF		-5.7	16	9.2	28133	47	225	6	2.7	1.1	801|805|808|6714|7450|8826	CALM1|CALM2|CALM3|SRC|VWF|IQGAP1	-3.7	MyList
Reactome Gene Sets	6	R-HSA-6802949	Signaling by RAS mutants		-5.7	16	9.2	28133	47	225	6	2.7	1.1	801|805|808|6714|7450|8826	CALM1|CALM2|CALM3|SRC|VWF|IQGAP1	-3.7	MyList
Reactome Gene Sets	6	R-HSA-9649948	Signaling downstream of RAS mutants		-5.7	16	9.2	28133	47	225	6	2.7	1.1	801|805|808|6714|7450|8826	CALM1|CALM2|CALM3|SRC|VWF|IQGAP1	-3.7	MyList
Reactome Gene Sets	6	R-HSA-6802946	Signaling by moderate kinase activity BRAF mutants		-5.7	16	9.2	28133	47	225	6	2.7	1.1	801|805|808|6714|7450|8826	CALM1|CALM2|CALM3|SRC|VWF|IQGAP1	-3.7	MyList
GO Biological Processes	19	GO:0033674	positive regulation of kinase activity	19_GO:0048518 positive regulation of biological process	-5.7	3.7	6.1	28133	604	225	18	8	1.8	801|805|808|2185|3146|4137|5208|5478|5716|6233|6647|6714|7311|7314|7316|8826|9693|219771	CALM1|CALM2|CALM3|PTK2B|HMGB1|MAPT|PFKFB2|PPIA|PSMD10|RPS27A|SOD1|SRC|UBA52|UBB|UBC|IQGAP1|RAPGEF2|CCNY	-3.7	MyList
GO Biological Processes	19	GO:0051493	regulation of cytoskeleton organization	19_GO:0071840 cellular component organization or biogenesis	-5.7	3.9	6.1	28133	544	225	17	7.6	1.8	88|822|1778|2039|2185|4035|4137|5066|5217|5879|7430|8826|9647|10763|22919|23406|29085	ACTN2|CAPG|DYNC1H1|DMTN|PTK2B|LRP1|MAPT|PAM|PFN2|RAC1|EZR|IQGAP1|PPM1F|NES|MAPRE1|COTL1|PHPT1	-3.7	MyList
GO Biological Processes	19	GO:0022604	regulation of cell morphogenesis	19_GO:0032502 developmental process	-5.7	4.1	6.2	28133	486	225	16	7.1	1.7	102|2039|2185|4035|4137|4974|5361|5591|5879|6714|7070|7143|7430|8499|9693|23499	ADAM10|DMTN|PTK2B|LRP1|MAPT|OMG|PLXNA1|PRKDC|RAC1|SRC|THY1|TNR|EZR|PPFIA2|RAPGEF2|MACF1	-3.7	MyList
Reactome Gene Sets	6	R-HSA-9635486	Infection with Mycobacterium tuberculosis		-5.7	23	10	28133	27	225	5	2.2	0.98	2023|6233|7311|7314|7316	ENO1|RPS27A|UBA52|UBB|UBC	-3.7	MyList
GO Biological Processes	19	GO:0031954	positive regulation of protein autophosphorylation	19_GO:0048518 positive regulation of biological process	-5.7	23	10	28133	27	225	5	2.2	0.98	801|805|808|6714|8826	CALM1|CALM2|CALM3|SRC|IQGAP1	-3.7	MyList
KEGG Pathway	24	ko04020	Calcium signaling pathway		-5.6	6.9	7.1	28133	182	225	10	4.4	1.4	291|293|801|805|808|2185|5333|5533|5582|113026	SLC25A4|SLC25A6|CALM1|CALM2|CALM3|PTK2B|PLCD1|PPP3CC|PRKCG|PLCD3	-3.7	MyList
Reactome Gene Sets	6	R-HSA-8856825	Cargo recognition for clathrin-mediated endocytosis		-5.6	9.4	7.8	28133	106	225	8	3.6	1.2	1211|1212|6233|7311|7314|7316|29978|84251	CLTA|CLTB|RPS27A|UBA52|UBB|UBC|UBQLN2|SGIP1	-3.7	MyList
GO Biological Processes	19	GO:1905114	cell surface receptor signaling pathway involved in cell-cell signaling	19_GO:0023052 signaling	-5.6	3.7	6	28133	614	225	18	8	1.8	801|2185|4035|5700|5716|5879|6233|6714|6804|7311|7314|7316|7442|23499|80349|112755|219287|219771	CALM1|PTK2B|LRP1|PSMC1|PSMD10|RAC1|RPS27A|SRC|STX1A|UBA52|UBB|UBC|TRPV1|MACF1|WDR61|STX1B|AMER2|CCNY	-3.6	MyList
Reactome Gene Sets	6	R-HSA-983712	Ion channel transport		-5.6	6.8	7.1	28133	185	225	10	4.4	1.4	534|801|805|808|6233|7311|7314|7316|7442|53826	ATP6V1G2|CALM1|CALM2|CALM3|RPS27A|UBA52|UBB|UBC|TRPV1|FXYD6	-3.6	MyList
Reactome Gene Sets	6	R-HSA-1855204	Synthesis of IP3 and IP4 in the cytosol		-5.6	22	10	28133	28	225	5	2.2	0.98	801|805|808|5333|113026	CALM1|CALM2|CALM3|PLCD1|PLCD3	-3.6	MyList
GO Biological Processes	19	GO:0007411	axon guidance	19_GO:0040011 locomotion	-5.6	5.4	6.6	28133	277	225	12	5.3	1.5	214|2596|2817|4035|5361|5879|6714|7143|7430|9369|10752|55740	ALCAM|GAP43|GPC1|LRP1|PLXNA1|RAC1|SRC|TNR|EZR|NRXN3|CHL1|ENAH	-3.6	MyList
Reactome Gene Sets	6	R-HSA-209543	p75NTR recruits signalling complexes		-5.6	38	12	28133	13	225	4	1.8	0.88	6233|7311|7314|7316	RPS27A|UBA52|UBB|UBC	-3.6	MyList
Reactome Gene Sets	6	R-HSA-9637687	Suppression of phagosomal maturation		-5.6	38	12	28133	13	225	4	1.8	0.88	6233|7311|7314|7316	RPS27A|UBA52|UBB|UBC	-3.6	MyList
Reactome Gene Sets	6	R-HSA-209560	NF-kB is activated and signals survival		-5.6	38	12	28133	13	225	4	1.8	0.88	6233|7311|7314|7316	RPS27A|UBA52|UBB|UBC	-3.6	MyList
Reactome Gene Sets	6	R-HSA-1358803	Downregulation of ERBB2:ERBB3 signaling		-5.6	38	12	28133	13	225	4	1.8	0.88	6233|7311|7314|7316	RPS27A|UBA52|UBB|UBC	-3.6	MyList
GO Biological Processes	19	GO:0014074	response to purine-containing compound	19_GO:0050896 response to stimulus	-5.6	7.8	7.3	28133	145	225	9	4	1.3	358|2039|2185|4724|5138|6647|7430|7442|9693	AQP1|DMTN|PTK2B|NDUFS4|PDE2A|SOD1|EZR|TRPV1|RAPGEF2	-3.6	MyList
GO Biological Processes	19	GO:0097485	neuron projection guidance	19_GO:0040011 locomotion	-5.6	5.4	6.6	28133	278	225	12	5.3	1.5	214|2596|2817|4035|5361|5879|6714|7143|7430|9369|10752|55740	ALCAM|GAP43|GPC1|LRP1|PLXNA1|RAC1|SRC|TNR|EZR|NRXN3|CHL1|ENAH	-3.6	MyList
GO Biological Processes	19	GO:0051347	positive regulation of transferase activity	19_GO:0065007 biological regulation	-5.6	3.5	5.9	28133	682	225	19	8.4	1.9	801|805|808|2185|3146|4137|4345|5208|5478|5716|6233|6647|6714|7311|7314|7316|8826|9693|219771	CALM1|CALM2|CALM3|PTK2B|HMGB1|MAPT|CD200|PFKFB2|PPIA|PSMD10|RPS27A|SOD1|SRC|UBA52|UBB|UBC|IQGAP1|RAPGEF2|CCNY	-3.6	MyList
Reactome Gene Sets	6	R-HSA-2672351	Stimuli-sensing channels		-5.6	9.2	7.7	28133	109	225	8	3.6	1.2	801|805|808|6233|7311|7314|7316|7442	CALM1|CALM2|CALM3|RPS27A|UBA52|UBB|UBC|TRPV1	-3.6	MyList
Reactome Gene Sets	6	R-HSA-177929	Signaling by EGFR		-5.5	15	8.9	28133	50	225	6	2.7	1.1	102|6233|6714|7311|7314|7316	ADAM10|RPS27A|SRC|UBA52|UBB|UBC	-3.6	MyList
Reactome Gene Sets	6	R-HSA-211733	Regulation of activated PAK-2p34 by proteasome mediated degradation		-5.5	15	8.9	28133	50	225	6	2.7	1.1	5700|5716|6233|7311|7314|7316	PSMC1|PSMD10|RPS27A|UBA52|UBB|UBC	-3.6	MyList
GO Biological Processes	19	GO:0009165	nucleotide biosynthetic process	19_GO:0008152 metabolic process	-5.5	4.6	6.3	28133	384	225	14	6.2	1.6	203|318|353|513|521|1854|2023|4860|5208|5224|9551|10632|23498|25874	AK1|NUDT2|APRT|ATP5F1D|ATP5ME|DUT|ENO1|PNP|PFKFB2|PGAM2|ATP5MF|ATP5MG|HAAO|MPC2	-3.6	MyList
GO Biological Processes	19	GO:1904951	positive regulation of establishment of protein localization	19_GO:0048518 positive regulation of biological process	-5.5	4.9	6.4	28133	331	225	13	5.8	1.6	637|4035|5208|5478|5533|5879|6714|7430|7447|10204|25874|29085|57506	BID|LRP1|PFKFB2|PPIA|PPP3CC|RAC1|SRC|EZR|VSNL1|NUTF2|MPC2|PHPT1|MAVS	-3.6	MyList
Reactome Gene Sets	6	R-HSA-168928	DDX58/IFIH1-mediated induction of interferon-alpha/beta		-5.5	11	8.1	28133	78	225	7	3.1	1.2	3146|6233|6285|7311|7314|7316|57506	HMGB1|RPS27A|S100B|UBA52|UBB|UBC|MAVS	-3.6	MyList
Reactome Gene Sets	6	R-HSA-5654732	Negative regulation of FGFR3 signaling		-5.5	22	9.9	28133	29	225	5	2.2	0.98	6233|6714|7311|7314|7316	RPS27A|SRC|UBA52|UBB|UBC	-3.6	MyList
Reactome Gene Sets	6	R-HSA-162588	Budding and maturation of HIV virion		-5.5	22	9.9	28133	29	225	5	2.2	0.98	5478|6233|7311|7314|7316	PPIA|RPS27A|UBA52|UBB|UBC	-3.6	MyList
Reactome Gene Sets	6	R-HSA-5205647	Mitophagy		-5.5	22	9.9	28133	29	225	5	2.2	0.98	6233|6714|7311|7314|7316	RPS27A|SRC|UBA52|UBB|UBC	-3.6	MyList
Reactome Gene Sets	6	R-HSA-6806834	Signaling by MET		-5.5	11	8.1	28133	79	225	7	3.1	1.2	1278|5879|6233|6714|7311|7314|7316	COL1A2|RAC1|RPS27A|SRC|UBA52|UBB|UBC	-3.5	MyList
Reactome Gene Sets	6	R-HSA-157118	Signaling by NOTCH		-5.5	5.8	6.7	28133	236	225	11	4.9	1.4	102|2173|4904|5700|5716|6233|7311|7314|7316|8359|26960	ADAM10|FABP7|YBX1|PSMC1|PSMD10|RPS27A|UBA52|UBB|UBC|H4C1|NBEA	-3.5	MyList
Reactome Gene Sets	6	R-HSA-68882	Mitotic Anaphase		-5.5	5.8	6.7	28133	236	225	11	4.9	1.4	1778|1780|5700|5716|6233|7311|7314|7316|22919|84617|84790	DYNC1H1|DYNC1I1|PSMC1|PSMD10|RPS27A|UBA52|UBB|UBC|MAPRE1|TUBB6|TUBA1C	-3.5	MyList
Reactome Gene Sets	6	R-HSA-9006934	Signaling by Receptor Tyrosine Kinases		-5.5	4	6	28133	505	225	16	7.1	1.7	102|534|801|805|808|1211|1278|2185|2670|5879|6233|6285|6714|7311|7314|7316	ADAM10|ATP6V1G2|CALM1|CALM2|CALM3|CLTA|COL1A2|PTK2B|GFAP|RAC1|RPS27A|S100B|SRC|UBA52|UBB|UBC	-3.5	MyList
Reactome Gene Sets	6	R-HSA-2555396	Mitotic Metaphase and Anaphase		-5.4	5.8	6.7	28133	237	225	11	4.9	1.4	1778|1780|5700|5716|6233|7311|7314|7316|22919|84617|84790	DYNC1H1|DYNC1I1|PSMC1|PSMD10|RPS27A|UBA52|UBB|UBC|MAPRE1|TUBB6|TUBA1C	-3.5	MyList
Reactome Gene Sets	6	R-HSA-69601	Ubiquitin Mediated Degradation of Phosphorylated Cdc25A		-5.4	14	8.7	28133	52	225	6	2.7	1.1	5700|5716|6233|7311|7314|7316	PSMC1|PSMD10|RPS27A|UBA52|UBB|UBC	-3.5	MyList
Reactome Gene Sets	6	R-HSA-180534	Vpu mediated degradation of CD4		-5.4	14	8.7	28133	52	225	6	2.7	1.1	5700|5716|6233|7311|7314|7316	PSMC1|PSMD10|RPS27A|UBA52|UBB|UBC	-3.5	MyList
Reactome Gene Sets	6	R-HSA-69610	p53-Independent DNA Damage Response		-5.4	14	8.7	28133	52	225	6	2.7	1.1	5700|5716|6233|7311|7314|7316	PSMC1|PSMD10|RPS27A|UBA52|UBB|UBC	-3.5	MyList
Reactome Gene Sets	6	R-HSA-349425	Autodegradation of the E3 ubiquitin ligase COP1		-5.4	14	8.7	28133	52	225	6	2.7	1.1	5700|5716|6233|7311|7314|7316	PSMC1|PSMD10|RPS27A|UBA52|UBB|UBC	-3.5	MyList
Reactome Gene Sets	6	R-HSA-75815	Ubiquitin-dependent degradation of Cyclin D		-5.4	14	8.7	28133	52	225	6	2.7	1.1	5700|5716|6233|7311|7314|7316	PSMC1|PSMD10|RPS27A|UBA52|UBB|UBC	-3.5	MyList
Reactome Gene Sets	6	R-HSA-69613	p53-Independent G1/S DNA damage checkpoint		-5.4	14	8.7	28133	52	225	6	2.7	1.1	5700|5716|6233|7311|7314|7316	PSMC1|PSMD10|RPS27A|UBA52|UBB|UBC	-3.5	MyList
Reactome Gene Sets	6	R-HSA-5610787	Hedgehog 'off' state		-5.4	8.9	7.5	28133	113	225	8	3.6	1.2	5700|5716|6233|7311|7314|7316|84617|84790	PSMC1|PSMD10|RPS27A|UBA52|UBB|UBC|TUBB6|TUBA1C	-3.5	MyList
GO Biological Processes	19	GO:0140029	exocytic process	19_GO:0051179 localization	-5.4	11	8	28133	80	225	7	3.1	1.2	2039|6616|6804|8541|9900|26059|112755	DMTN|SNAP25|STX1A|PPFIA3|SV2A|ERC2|STX1B	-3.5	MyList
Reactome Gene Sets	6	R-HSA-174490	Membrane binding and targetting of GAG proteins		-5.4	36	12	28133	14	225	4	1.8	0.88	6233|7311|7314|7316	RPS27A|UBA52|UBB|UBC	-3.5	MyList
Reactome Gene Sets	6	R-HSA-174495	Synthesis And Processing Of GAG, GAGPOL Polyproteins		-5.4	36	12	28133	14	225	4	1.8	0.88	6233|7311|7314|7316	RPS27A|UBA52|UBB|UBC	-3.5	MyList
Reactome Gene Sets	6	R-HSA-975110	TRAF6 mediated IRF7 activation in TLR7/8 or 9 signaling		-5.4	36	12	28133	14	225	4	1.8	0.88	6233|7311|7314|7316	RPS27A|UBA52|UBB|UBC	-3.5	MyList
GO Biological Processes	19	GO:0030036	actin cytoskeleton organization	19_GO:0071840 cellular component organization or biogenesis	-5.4	3.4	5.8	28133	696	225	19	8.4	1.9	88|358|822|1465|2039|2185|2317|4035|5066|5217|5879|6714|7171|7430|8826|9647|23406|29085|55740	ACTN2|AQP1|CAPG|CSRP1|DMTN|PTK2B|FLNB|LRP1|PAM|PFN2|RAC1|SRC|TPM4|EZR|IQGAP1|PPM1F|COTL1|PHPT1|ENAH	-3.5	MyList
KEGG Pathway	24	ko05016	Huntington's disease		-5.4	6.5	6.9	28133	193	225	10	4.4	1.4	291|293|513|1211|1212|1329|4724|6647|7381|29796	SLC25A4|SLC25A6|ATP5F1D|CLTA|CLTB|COX5B|NDUFS4|SOD1|UQCRB|UQCR10	-3.5	MyList
Reactome Gene Sets	6	R-HSA-169911	Regulation of Apoptosis		-5.4	14	8.6	28133	53	225	6	2.7	1.1	5700|5716|6233|7311|7314|7316	PSMC1|PSMD10|RPS27A|UBA52|UBB|UBC	-3.5	MyList
GO Biological Processes	19	GO:0009611	response to wounding	19_GO:0050896 response to stimulus	-5.4	3.4	5.8	28133	701	225	19	8.4	1.9	954|1278|1465|2039|2596|3146|3371|4035|5339|5478|5582|5879|6647|6714|7143|7450|8546|10752|23499	ENTPD2|COL1A2|CSRP1|DMTN|GAP43|HMGB1|TNC|LRP1|PLEC|PPIA|PRKCG|RAC1|SOD1|SRC|TNR|VWF|AP3B1|CHL1|MACF1	-3.5	MyList
Reactome Gene Sets	6	R-HSA-9013694	Signaling by NOTCH4		-5.4	11	7.9	28133	82	225	7	3.1	1.2	102|5700|5716|6233|7311|7314|7316	ADAM10|PSMC1|PSMD10|RPS27A|UBA52|UBB|UBC	-3.5	MyList
KEGG Pathway	24	ko04512	ECM-receptor interaction		-5.4	11	7.9	28133	82	225	7	3.1	1.2	1278|3371|3696|7143|7450|9900|375790	COL1A2|TNC|ITGB8|TNR|VWF|SV2A|AGRN	-3.5	MyList
GO Biological Processes	19	GO:0030705	cytoskeleton-dependent intracellular transport	19_GO:0051179 localization	-5.4	6.4	6.8	28133	196	225	10	4.4	1.4	1778|1780|4137|6647|7314|8499|8546|8943|55207|84790	DYNC1H1|DYNC1I1|MAPT|SOD1|UBB|PPFIA2|AP3B1|AP3D1|ARL8B|TUBA1C	-3.5	MyList
Reactome Gene Sets	6	R-HSA-69275	G2/M Transition		-5.4	6.4	6.8	28133	196	225	10	4.4	1.4	1778|5700|5716|6233|7311|7314|7316|22919|84617|84790	DYNC1H1|PSMC1|PSMD10|RPS27A|UBA52|UBB|UBC|MAPRE1|TUBB6|TUBA1C	-3.5	MyList
Reactome Gene Sets	6	R-HSA-2122948	Activated NOTCH1 Transmits Signal to the Nucleus		-5.3	20	9.6	28133	31	225	5	2.2	0.98	102|6233|7311|7314|7316	ADAM10|RPS27A|UBA52|UBB|UBC	-3.4	MyList
Reactome Gene Sets	6	R-HSA-5654733	Negative regulation of FGFR4 signaling		-5.3	20	9.6	28133	31	225	5	2.2	0.98	6233|6714|7311|7314|7316	RPS27A|SRC|UBA52|UBB|UBC	-3.4	MyList
Reactome Gene Sets	6	R-HSA-8949613	Cristae formation		-5.3	20	9.6	28133	31	225	5	2.2	0.98	513|521|9551|10632|54927	ATP5F1D|ATP5ME|ATP5MF|ATP5MG|CHCHD3	-3.4	MyList
Reactome Gene Sets	6	R-HSA-9604323	Negative regulation of NOTCH4 signaling		-5.3	14	8.5	28133	54	225	6	2.7	1.1	5700|5716|6233|7311|7314|7316	PSMC1|PSMD10|RPS27A|UBA52|UBB|UBC	-3.4	MyList
Reactome Gene Sets	6	R-HSA-180585	Vif-mediated degradation of APOBEC3G		-5.3	14	8.5	28133	54	225	6	2.7	1.1	5700|5716|6233|7311|7314|7316	PSMC1|PSMD10|RPS27A|UBA52|UBB|UBC	-3.4	MyList
Reactome Gene Sets	6	R-HSA-8854050	FBXL7 down-regulates AURKA during mitotic entry and in early mitosis		-5.3	14	8.5	28133	54	225	6	2.7	1.1	5700|5716|6233|7311|7314|7316	PSMC1|PSMD10|RPS27A|UBA52|UBB|UBC	-3.4	MyList
Reactome Gene Sets	6	R-HSA-453274	Mitotic G2-G2/M phases		-5.3	6.3	6.7	28133	198	225	10	4.4	1.4	1778|5700|5716|6233|7311|7314|7316|22919|84617|84790	DYNC1H1|PSMC1|PSMD10|RPS27A|UBA52|UBB|UBC|MAPRE1|TUBB6|TUBA1C	-3.4	MyList
[truncated: 1,240 more rows]
