# Supplementary material for: Olfactory Bulb Proteomics Reveals Widespread Proteostatic Disturbances in Mixed Dementia and Guides for Potential Serum Biomarkers to Discriminate Alzheimer Disease and Mixed Dementia Phenotypes
Source: Preprints.org preprint supplement (doi:10.20944/preprints202104.0748.v1), 2021-04-28
Supplement: Supplementary file 4 [file Supplementary Table 4. Functional clustering comparing OB DEPs in AD stages III-IV, stages V-VI and MixD subjects.xlsx]

## Sheet: Supplementary table 4. Function
_MEMBER_AD (III-IV)	_MEMBER_AD (V-VI)	_MEMBER_MIXED DEMENTIA	_LogP_AD (III-IV)	_LogP_AD (V-VI)	_LogP_MIXED DEMENTIA	GO	_PATTERN_	_RANK_	GiniIndex	Category	CategoryID	Description	PARENT_GO	LogP	Enrichment	Z-score	#TotalGeneInLibrary	#GeneInGO	#GeneInHitList	#GeneInGOAndHitList	%InGO	STDV %InGO	GeneID	Hits	Log(q-value)	EvidenceCutoff	GROUP_ID	FirstInGroupByEnrichment	FirstInGroupByLogP	BestLogPInGroup	BestEnrichmentInGroup	URL
1	1	1	-7.3998	-10.8934	-9.17915	R-HSA-9675108	M111	3	0	Reactome Gene Sets	6	Nervous system development		-21.1255	5.65412	13.6567	28133	576	406	47	11.5764	1.58784	102|214|1020|1175|1211|1212|2596|2817|3983|4629|4637|5217|5361|5605|5683|5692|5700|5701|5710|5711|5716|5718|5786|5879|5962|6133|6193|6714|6923|7204|7314|7402|7430|7525|9491|10095|10096|10383|10752|11313|23114|23122|55740|79784|84617|84790|375790	ADAM10|ALCAM|CDK5|AP2S1|CLTA|CLTB|GAP43|GPC1|ABLIM1|MYH11|MYL6|PFN2|PLXNA1|MAP2K2|PSMA2|PSMB4|PSMC1|PSMC2|PSMD4|PSMD5|PSMD10|PSMD12|PTPRA|RAC1|RDX|RPL9|RPS5|SRC|ELOB|TRIO|UBB|UTRN|EZR|YES1|PSMF1|ARPC1B|ACTR3|TUBB4B|CHL1|LYPLA2|NFASC|CLASP2|ENAH|MYH14|TUBB6|TUBA1C|AGRN	-17.0506	0	1	1	1	-21.1255	20.7879
1	1	1	-7.65261	-11.2542	-8.7648	R-HSA-422475	M111	3	0	Reactome Gene Sets	6	Axon guidance		-21.0824	5.78491	13.7261	28133	551	406	46	11.33	1.57304	102|214|1020|1175|1211|1212|2596|2817|3983|4629|4637|5217|5361|5605|5683|5692|5700|5701|5710|5711|5716|5718|5786|5879|5962|6133|6193|6714|6923|7204|7314|7430|7525|9491|10095|10096|10383|10752|11313|23114|23122|55740|79784|84617|84790|375790	ADAM10|ALCAM|CDK5|AP2S1|CLTA|CLTB|GAP43|GPC1|ABLIM1|MYH11|MYL6|PFN2|PLXNA1|MAP2K2|PSMA2|PSMB4|PSMC1|PSMC2|PSMD4|PSMD5|PSMD10|PSMD12|PTPRA|RAC1|RDX|RPL9|RPS5|SRC|ELOB|TRIO|UBB|EZR|YES1|PSMF1|ARPC1B|ACTR3|TUBB4B|CHL1|LYPLA2|NFASC|CLASP2|ENAH|MYH14|TUBB6|TUBA1C|AGRN	-17.0506	0	1	0	0	-21.1255	20.7879
1	1	1	-7.73975	-9.15246	-4.77294	R-HSA-3858494	M111	3	0	Reactome Gene Sets	6	Beta-catenin independent WNT signaling		-13.4291	9.49221	12.4489	28133	146	406	20	4.92611	1.07404	805|1175|1211|1212|2775|2786|5582|5683|5692|5700|5701|5710|5711|5716|5718|5879|7314|9491|10681|59345	CALM2|AP2S1|CLTA|CLTB|GNAO1|GNG4|PRKCG|PSMA2|PSMB4|PSMC1|PSMC2|PSMD4|PSMD5|PSMD10|PSMD12|RAC1|UBB|PSMF1|GNB5|GNB4	-10.4681	0	1	0	0	-21.1255	20.7879
1	1	1	-5.46902	-4.86461	-5.16956	R-HSA-4086400	M111	3	0	Reactome Gene Sets	6	PCP/CE pathway		-11.3445	11.2978	11.9716	28133	92	406	15	3.69458	0.936149	1175|1211|1212|5582|5683|5692|5700|5701|5710|5711|5716|5718|5879|7314|9491	AP2S1|CLTA|CLTB|PRKCG|PSMA2|PSMB4|PSMC1|PSMC2|PSMD4|PSMD5|PSMD10|PSMD12|RAC1|UBB|PSMF1	-8.60888	0	1	0	0	-21.1255	20.7879
1	1	1	-5.92385	-4.12619	-4.56371	R-HSA-8852276	M111	3	0	Reactome Gene Sets	6	The role of GTSE1 in G2/M progression after G2 checkpoint		-11.3005	12.5987	12.3326	28133	77	406	14	3.44828	0.905562	5683|5692|5700|5701|5710|5711|5716|5718|7314|9491|10383|22919|84617|84790	PSMA2|PSMB4|PSMC1|PSMC2|PSMD4|PSMD5|PSMD10|PSMD12|UBB|PSMF1|TUBB4B|MAPRE1|TUBB6|TUBA1C	-8.585	0	1	0	0	-21.1255	20.7879
1	1	1	-5.67627	-3.98443	-3.9615	R-HSA-5357801	M111	3	0	Reactome Gene Sets	6	Programmed Cell Death		-11.2504	7.29401	10.5337	28133	190	406	20	4.92611	1.07404	637|2339|2934|3146|4137|5339|5533|5683|5692|5700|5701|5710|5711|5716|5718|7082|7314|9491|10134|10211	BID|FNTA|GSN|HMGB1|MAPT|PLEC|PPP3CC|PSMA2|PSMB4|PSMC1|PSMC2|PSMD4|PSMD5|PSMD10|PSMD12|TJP1|UBB|PSMF1|BCAP31|FLOT1	-8.5447	0	1	0	0	-21.1255	20.7879
1	1	1	-5.73574	-5.03912	-4.19402	R-HSA-162909	M111	3	0	Reactome Gene Sets	6	Host Interactions of HIV factors		-11.1712	9.06141	11.1479	28133	130	406	17	4.18719	0.994055	291|293|1175|5478|5683|5692|5700|5701|5710|5711|5716|5718|5879|6923|7314|9491|51606	SLC25A4|SLC25A6|AP2S1|PPIA|PSMA2|PSMB4|PSMC1|PSMC2|PSMD4|PSMD5|PSMD10|PSMD12|RAC1|ELOB|UBB|PSMF1|ATP6V1H	-8.47503	0	1	0	0	-21.1255	20.7879
1	1	1	-4.83661	-4.16175	-4.15891	R-HSA-109581	M111	3	0	Reactome Gene Sets	6	Apoptosis		-10.8247	7.39645	10.3593	28133	178	406	19	4.6798	1.0482	637|2339|2934|3146|4137|5339|5533|5683|5692|5700|5701|5710|5711|5716|5718|7082|7314|9491|10134	BID|FNTA|GSN|HMGB1|MAPT|PLEC|PPP3CC|PSMA2|PSMB4|PSMC1|PSMC2|PSMD4|PSMD5|PSMD10|PSMD12|TJP1|UBB|PSMF1|BCAP31	-8.147	0	1	0	0	-21.1255	20.7879
1	1	1	-7.53386	-9.15283	-2.97655	R-HSA-195721	M111	3	0	Reactome Gene Sets	6	Signaling by WNT		-10.6574	5.21785	9.35497	28133	332	406	25	6.15764	1.19301	805|1175|1211|1212|1487|2775|2786|3020|5582|5683|5692|5700|5701|5710|5711|5716|5718|5879|7314|8359|8452|9491|10681|55737|59345	CALM2|AP2S1|CLTA|CLTB|CTBP1|GNAO1|GNG4|H3-3A|PRKCG|PSMA2|PSMB4|PSMC1|PSMC2|PSMD4|PSMD5|PSMD10|PSMD12|RAC1|UBB|H4C1|CUL3|PSMF1|GNB5|VPS35|GNB4	-7.98865	0	1	0	0	-21.1255	20.7879
1	1	1	-5.59749	-5.11553	-4.22809	R-HSA-8953897	M111	3	0	Reactome Gene Sets	6	Cellular responses to external stimuli		-10.2145	3.82387	8.44625	28133	598	406	33	8.12808	1.3562	318|534|829|1465|1778|1780|2950|3020|5683|5692|5700|5701|5710|5711|5716|5718|6133|6193|6647|6923|7314|8359|9491|9588|10111|10383|11258|23043|25828|51382|51606|84617|84790	NUDT2|ATP6V1G2|CAPZA1|CSRP1|DYNC1H1|DYNC1I1|GSTP1|H3-3A|PSMA2|PSMB4|PSMC1|PSMC2|PSMD4|PSMD5|PSMD10|PSMD12|RPL9|RPS5|SOD1|ELOB|UBB|H4C1|PSMF1|PRDX6|RAD50|TUBB4B|DCTN3|TNIK|TXN2|ATP6V1D|ATP6V1H|TUBB6|TUBA1C	-7.57987	0	1	0	0	-21.1255	20.7879
1	1	1	-5.71015	-5.23193	-3.77713	R-HSA-2262752	M111	3	0	Reactome Gene Sets	6	Cellular responses to stress		-9.84169	3.79688	8.26494	28133	584	406	32	7.88177	1.33728	318|534|829|1778|1780|2950|3020|5683|5692|5700|5701|5710|5711|5716|5718|6133|6193|6647|6923|7314|8359|9491|9588|10111|10383|11258|23043|25828|51382|51606|84617|84790	NUDT2|ATP6V1G2|CAPZA1|DYNC1H1|DYNC1I1|GSTP1|H3-3A|PSMA2|PSMB4|PSMC1|PSMC2|PSMD4|PSMD5|PSMD10|PSMD12|RPL9|RPS5|SOD1|ELOB|UBB|H4C1|PSMF1|PRDX6|RAD50|TUBB4B|DCTN3|TNIK|TXN2|ATP6V1D|ATP6V1H|TUBB6|TUBA1C	-7.24621	0	1	0	0	-21.1255	20.7879
1	1	1	-8.35467	-4.50801	-3.50472	R-HSA-5673001	M111	3	0	Reactome Gene Sets	6	RAF/MAP kinase cascade		-9.79922	5.44446	9.04427	28133	280	406	22	5.41872	1.12354	88|408|805|2244|2339|5605|5683|5692|5700|5701|5710|5711|5716|5718|5786|6714|7314|7450|8452|8826|9491|9693	ACTN2|ARRB1|CALM2|FGB|FNTA|MAP2K2|PSMA2|PSMB4|PSMC1|PSMC2|PSMD4|PSMD5|PSMD10|PSMD12|PTPRA|SRC|UBB|VWF|CUL3|IQGAP1|PSMF1|RAPGEF2	-7.21846	0	1	0	0	-21.1255	20.7879
1	1	1	-8.25159	-4.43632	-3.43759	R-HSA-5684996	M111	3	0	Reactome Gene Sets	6	MAPK1/MAPK3 signaling		-9.62303	5.33024	8.90671	28133	286	406	22	5.41872	1.12354	88|408|805|2244|2339|5605|5683|5692|5700|5701|5710|5711|5716|5718|5786|6714|7314|7450|8452|8826|9491|9693	ACTN2|ARRB1|CALM2|FGB|FNTA|MAP2K2|PSMA2|PSMB4|PSMC1|PSMC2|PSMD4|PSMD5|PSMD10|PSMD12|PTPRA|SRC|UBB|VWF|CUL3|IQGAP1|PSMF1|RAPGEF2	-7.08367	0	1	0	0	-21.1255	20.7879
1	1	1	-6.8508	-3.61367	-2.09179	R-HSA-180585	M111	3	0	Reactome Gene Sets	6	Vif-mediated degradation of APOBEC3G		-9.56677	14.1153	11.6733	28133	54	406	11	2.70936	0.80576	5683|5692|5700|5701|5710|5711|5716|5718|6923|7314|9491	PSMA2|PSMB4|PSMC1|PSMC2|PSMD4|PSMD5|PSMD10|PSMD12|ELOB|UBB|PSMF1	-7.03394	0	1	0	0	-21.1255	20.7879
1	1	1	-5.3494	-3.58277	-3.08646	R-HSA-8941858	M111	3	0	Reactome Gene Sets	6	Regulation of RUNX3 expression and activity		-9.47547	13.8586	11.5506	28133	55	406	11	2.70936	0.80576	5683|5692|5700|5701|5710|5711|5716|5718|6714|7314|9491	PSMA2|PSMB4|PSMC1|PSMC2|PSMD4|PSMD5|PSMD10|PSMD12|SRC|UBB|PSMF1	-6.96166	0	1	0	0	-21.1255	20.7879
1	1	1	-7.63559	-4.78772	-3.6826	R-HSA-5683057	M111	3	0	Reactome Gene Sets	6	MAPK family signaling cascades		-9.3191	4.90382	8.56561	28133	325	406	23	5.66502	1.14729	88|408|805|2244|2339|5605|5683|5692|5700|5701|5710|5711|5716|5718|5786|5879|6714|7314|7450|8452|8826|9491|9693	ACTN2|ARRB1|CALM2|FGB|FNTA|MAP2K2|PSMA2|PSMB4|PSMC1|PSMC2|PSMD4|PSMD5|PSMD10|PSMD12|PTPRA|RAC1|SRC|UBB|VWF|CUL3|IQGAP1|PSMF1|RAPGEF2	-6.86382	0	1	0	0	-21.1255	20.7879
1	1	1	-5.23473	-2.82573	-4.32396	R-HSA-376176	M111	3	0	Reactome Gene Sets	6	Signaling by ROBO receptors		-9.29875	6.03931	9.03841	28133	218	406	19	4.6798	1.0482	2817|5217|5683|5692|5700|5701|5710|5711|5716|5718|5879|6133|6193|6714|6923|7314|9491|23122|55740	GPC1|PFN2|PSMA2|PSMB4|PSMC1|PSMC2|PSMD4|PSMD5|PSMD10|PSMD12|RAC1|RPL9|RPS5|SRC|ELOB|UBB|PSMF1|CLASP2|ENAH	-6.86382	0	1	0	0	-21.1255	20.7879
1	1	1	-6.7078	-4.76081	-2.02724	R-HSA-4641258	M111	3	0	Reactome Gene Sets	6	Degradation of DVL		-9.2986	13.3724	11.3145	28133	57	406	11	2.70936	0.80576	5683|5692|5700|5701|5710|5711|5716|5718|7314|8452|9491	PSMA2|PSMB4|PSMC1|PSMC2|PSMD4|PSMD5|PSMD10|PSMD12|UBB|CUL3|PSMF1	-6.86382	0	1	0	0	-21.1255	20.7879
1	1	1	-4.04904	-7.13153	-3.55568	GO:1905114	M111	3	0	GO Biological Processes	19	cell surface receptor signaling pathway involved in cell-cell signaling	19_GO:0023052 signaling	-9.29793	3.61137	7.91676	28133	614	406	32	7.88177	1.33728	348|1000|1020|1175|2185|2775|3728|4035|5300|5683|5692|5700|5701|5710|5711|5716|5718|5879|6543|6714|6804|7314|7442|8452|9491|23043|23499|55737|80349|112755|219287|219771	APOE|CDH2|CDK5|AP2S1|PTK2B|GNAO1|JUP|LRP1|PIN1|PSMA2|PSMB4|PSMC1|PSMC2|PSMD4|PSMD5|PSMD10|PSMD12|RAC1|SLC8A2|SRC|STX1A|UBB|TRPV1|CUL3|PSMF1|TNIK|MACF1|VPS35|WDR61|STX1B|AMER2|CCNY	-6.86382	0	1	0	0	-21.1255	20.7879
1	1	1	-6.47374	-5.67567	-2.24098	R-HSA-5358351	M111	3	0	Reactome Gene Sets	6	Signaling by Hedgehog		-9.24966	7.44087	9.53882	28133	149	406	16	3.94089	0.965613	408|5577|5683|5692|5700|5701|5710|5711|5716|5718|7314|8452|9491|10383|84617|84790	ARRB1|PRKAR2B|PSMA2|PSMB4|PSMC1|PSMC2|PSMD4|PSMD5|PSMD10|PSMD12|UBB|CUL3|PSMF1|TUBB4B|TUBB6|TUBA1C	-6.8285	0	1	0	0	-21.1255	20.7879
1	1	1	-4.56729	-3.90056	-3.10434	R-HSA-69275	M111	3	0	Reactome Gene Sets	6	G2/M Transition		-9.20823	6.36365	9.11823	28133	196	406	18	4.4335	1.02156	1778|5577|5683|5692|5700|5701|5710|5711|5716|5718|7314|9491|10383|11258|22919|84617|84790|203068	DYNC1H1|PRKAR2B|PSMA2|PSMB4|PSMC1|PSMC2|PSMD4|PSMD5|PSMD10|PSMD12|UBB|PSMF1|TUBB4B|DCTN3|MAPRE1|TUBB6|TUBA1C|TUBB	-6.79872	0	1	0	0	-21.1255	20.7879
1	1	1	-4.53909	-3.87327	-3.07852	R-HSA-453274	M111	3	0	Reactome Gene Sets	6	Mitotic G2-G2/M phases		-9.13664	6.29937	9.05513	28133	198	406	18	4.4335	1.02156	1778|5577|5683|5692|5700|5701|5710|5711|5716|5718|7314|9491|10383|11258|22919|84617|84790|203068	DYNC1H1|PRKAR2B|PSMA2|PSMB4|PSMC1|PSMC2|PSMD4|PSMD5|PSMD10|PSMD12|UBB|PSMF1|TUBB4B|DCTN3|MAPRE1|TUBB6|TUBA1C|TUBB	-6.73678	0	1	0	0	-21.1255	20.7879
1	1	1	-4.95233	-4.35726	-2.75592	R-HSA-5610787	M111	3	0	Reactome Gene Sets	6	Hedgehog 'off' state		-8.99087	8.58499	9.77624	28133	113	406	14	3.44828	0.905562	5577|5683|5692|5700|5701|5710|5711|5716|5718|7314|9491|10383|84617|84790	PRKAR2B|PSMA2|PSMB4|PSMC1|PSMC2|PSMD4|PSMD5|PSMD10|PSMD12|UBB|PSMF1|TUBB4B|TUBB6|TUBA1C	-6.62319	0	1	0	0	-21.1255	20.7879
1	1	1	-5.99511	-7.01839	-2.66262	GO:0019882	M111	3	0	GO Biological Processes	19	antigen processing and presentation	19_GO:0002376 immune system process	-8.78106	5.62636	8.59934	28133	234	406	19	4.6798	1.0482	829|1175|1211|1778|1780|5683|5692|5700|5701|5710|5711|5716|5718|8546|8943|9491|10134|11258|51752	CAPZA1|AP2S1|CLTA|DYNC1H1|DYNC1I1|PSMA2|PSMB4|PSMC1|PSMC2|PSMD4|PSMD5|PSMD10|PSMD12|AP3B1|AP3D1|PSMF1|BCAP31|DCTN3|ERAP1	-6.44746	0	1	0	0	-21.1255	20.7879
1	1	1	-6.36487	-3.78726	-2.83538	GO:0001666	M111	3	0	GO Biological Processes	19	response to hypoxia	19_GO:0050896 response to stimulus	-8.74425	4.57972	8.13102	28133	348	406	23	5.66502	1.14729	210|358|952|2023|2185|4842|5066|5300|5683|5692|5700|5701|5710|5711|5716|5718|6714|6923|7314|9491|10525|11331|25828	ALAD|AQP1|CD38|ENO1|PTK2B|NOS1|PAM|PIN1|PSMA2|PSMB4|PSMC1|PSMC2|PSMD4|PSMD5|PSMD10|PSMD12|SRC|ELOB|UBB|PSMF1|HYOU1|PHB2|TXN2	-6.41473	0	1	0	0	-21.1255	20.7879
1	1	1	-4.72838	-5.96104	-3.25237	GO:0019884	M111	3	0	GO Biological Processes	19	antigen processing and presentation of exogenous antigen	19_GO:0002376 immune system process	-8.73427	6.36747	8.86324	28133	185	406	17	4.18719	0.994055	829|1175|1211|1778|1780|5683|5692|5700|5701|5710|5711|5716|5718|8546|8943|9491|11258	CAPZA1|AP2S1|CLTA|DYNC1H1|DYNC1I1|PSMA2|PSMB4|PSMC1|PSMC2|PSMD4|PSMD5|PSMD10|PSMD12|AP3B1|AP3D1|PSMF1|DCTN3	-6.40879	0	1	0	0	-21.1255	20.7879
1	1	1	-5.5571	-3.74385	-2.18442	R-HSA-211733	M111	3	0	Reactome Gene Sets	6	Regulation of activated PAK-2p34 by proteasome mediated degradation		-8.66652	13.8586	11.0121	28133	50	406	10	2.46305	0.769234	5683|5692|5700|5701|5710|5711|5716|5718|7314|9491	PSMA2|PSMB4|PSMC1|PSMC2|PSMD4|PSMD5|PSMD10|PSMD12|UBB|PSMF1	-6.34504	0	1	0	0	-21.1255	20.7879
1	1	0	-6.32324	-3.27861	0	R-HSA-1234176	M110	2	0	Reactome Gene Sets	6	Oxygen-dependent proline hydroxylation of Hypoxia-inducible Factor Alpha		-8.58408	11.5489	10.3822	28133	66	406	11	2.70936	0.80576	5683|5692|5700|5701|5710|5711|5716|5718|6923|7314|9491	PSMA2|PSMB4|PSMC1|PSMC2|PSMD4|PSMD5|PSMD10|PSMD12|ELOB|UBB|PSMF1	-6.27049	0	1	0	0	-21.1255	20.7879
1	1	1	-5.73127	-3.97077	-3.36053	R-HSA-1168372	M111	3	0	Reactome Gene Sets	6	Downstream signaling events of B Cell Receptor (BCR)		-8.57314	10.0183	9.95653	28133	83	406	12	2.95567	0.840523	805|5478|5683|5692|5700|5701|5710|5711|5716|5718|7314|9491	CALM2|PPIA|PSMA2|PSMB4|PSMC1|PSMC2|PSMD4|PSMD5|PSMD10|PSMD12|UBB|PSMF1	-6.26346	0	1	0	0	-21.1255	20.7879
1	1	1	-4.63922	-3.97024	-3.94572	R-HSA-2467813	M111	3	0	Reactome Gene Sets	6	Separation of Sister Chromatids		-8.52217	6.16745	8.67114	28133	191	406	17	4.18719	0.994055	1778|1780|5683|5692|5700|5701|5710|5711|5716|5718|7314|9491|10383|22919|23122|84617|84790	DYNC1H1|DYNC1I1|PSMA2|PSMB4|PSMC1|PSMC2|PSMD4|PSMD5|PSMD10|PSMD12|UBB|PSMF1|TUBB4B|MAPRE1|CLASP2|TUBB6|TUBA1C	-6.22814	0	1	0	0	-21.1255	20.7879
1	1	1	-5.184	-4.58449	-2.93443	R-HSA-9020702	M111	3	0	Reactome Gene Sets	6	Interleukin-1 signaling		-8.49223	8.74573	9.52975	28133	103	406	13	3.20197	0.873733	3146|5683|5692|5700|5701|5710|5711|5716|5718|6285|7314|9491|54472	HMGB1|PSMA2|PSMB4|PSMC1|PSMC2|PSMD4|PSMD5|PSMD10|PSMD12|S100B|UBB|PSMF1|TOLLIP	-6.22814	0	1	0	0	-21.1255	20.7879
1	1	1	-5.47144	-3.6774	-2.1371	R-HSA-180534	M111	3	0	Reactome Gene Sets	6	Vpu mediated degradation of CD4		-8.49013	13.3256	10.765	28133	52	406	10	2.46305	0.769234	5683|5692|5700|5701|5710|5711|5716|5718|7314|9491	PSMA2|PSMB4|PSMC1|PSMC2|PSMD4|PSMD5|PSMD10|PSMD12|UBB|PSMF1	-6.22814	0	1	0	0	-21.1255	20.7879
1	1	1	-5.47144	-3.6774	-2.1371	R-HSA-349425	M111	3	0	Reactome Gene Sets	6	Autodegradation of the E3 ubiquitin ligase COP1		-8.49013	13.3256	10.765	28133	52	406	10	2.46305	0.769234	5683|5692|5700|5701|5710|5711|5716|5718|7314|9491	PSMA2|PSMB4|PSMC1|PSMC2|PSMD4|PSMD5|PSMD10|PSMD12|UBB|PSMF1	-6.22814	0	1	0	0	-21.1255	20.7879
1	1	1	-5.47144	-3.6774	-2.1371	R-HSA-69601	M111	3	0	Reactome Gene Sets	6	Ubiquitin Mediated Degradation of Phosphorylated Cdc25A		-8.49013	13.3256	10.765	28133	52	406	10	2.46305	0.769234	5683|5692|5700|5701|5710|5711|5716|5718|7314|9491	PSMA2|PSMB4|PSMC1|PSMC2|PSMD4|PSMD5|PSMD10|PSMD12|UBB|PSMF1	-6.22814	0	1	0	0	-21.1255	20.7879
1	1	1	-5.47144	-3.6774	-2.1371	R-HSA-69610	M111	3	0	Reactome Gene Sets	6	p53-Independent DNA Damage Response		-8.49013	13.3256	10.765	28133	52	406	10	2.46305	0.769234	5683|5692|5700|5701|5710|5711|5716|5718|7314|9491	PSMA2|PSMB4|PSMC1|PSMC2|PSMD4|PSMD5|PSMD10|PSMD12|UBB|PSMF1	-6.22814	0	1	0	0	-21.1255	20.7879
1	1	1	-5.47144	-3.6774	-2.1371	R-HSA-69613	M111	3	0	Reactome Gene Sets	6	p53-Independent G1/S DNA damage checkpoint		-8.49013	13.3256	10.765	28133	52	406	10	2.46305	0.769234	5683|5692|5700|5701|5710|5711|5716|5718|7314|9491	PSMA2|PSMB4|PSMC1|PSMC2|PSMD4|PSMD5|PSMD10|PSMD12|UBB|PSMF1	-6.22814	0	1	0	0	-21.1255	20.7879
1	1	1	-5.47144	-3.6774	-2.1371	R-HSA-75815	M111	3	0	Reactome Gene Sets	6	Ubiquitin-dependent degradation of Cyclin D		-8.49013	13.3256	10.765	28133	52	406	10	2.46305	0.769234	5683|5692|5700|5701|5710|5711|5716|5718|7314|9491	PSMA2|PSMB4|PSMC1|PSMC2|PSMD4|PSMD5|PSMD10|PSMD12|UBB|PSMF1	-6.22814	0	1	0	0	-21.1255	20.7879
1	0	1	-2.26133	0	-6.59669	GO:0019439	M101	2	0	GO Biological Processes	19	aromatic compound catabolic process	19_GO:0008152 metabolic process	-8.47167	3.19237	7.30327	28133	738	406	34	8.37438	1.37474	954|1312|1854|1994|2023|2184|2521|3146|4670|4860|4904|5138|5208|5224|5445|5683|5692|5700|5701|5710|5711|5716|5718|6133|6193|7314|8570|9491|10591|23498|30833|57819|80349|201626	ENTPD2|COMT|DUT|ELAVL1|ENO1|FAH|FUS|HMGB1|HNRNPM|PNP|YBX1|PDE2A|PFKFB2|PGAM2|PON2|PSMA2|PSMB4|PSMC1|PSMC2|PSMD4|PSMD5|PSMD10|PSMD12|RPL9|RPS5|UBB|KHSRP|PSMF1|DNPH1|HAAO|NT5C|LSM2|WDR61|PDE12	-6.21657	0	1	0	0	-21.1255	20.7879
1	1	1	-6.21984	-3.67793	-2.73506	GO:0036293	M111	3	0	GO Biological Processes	19	response to decreased oxygen levels	19_GO:0050896 response to stimulus	-8.46326	4.42706	7.91906	28133	360	406	23	5.66502	1.14729	210|358|952|2023|2185|4842|5066|5300|5683|5692|5700|5701|5710|5711|5716|5718|6714|6923|7314|9491|10525|11331|25828	ALAD|AQP1|CD38|ENO1|PTK2B|NOS1|PAM|PIN1|PSMA2|PSMB4|PSMC1|PSMC2|PSMD4|PSMD5|PSMD10|PSMD12|SRC|ELOB|UBB|PSMF1|HYOU1|PHB2|TXN2	-6.21495	0	1	0	0	-21.1255	20.7879
1	1	0	-6.99514	-5.06287	0	R-HSA-5632684	M110	2	0	Reactome Gene Sets	6	Hedgehog 'on' state		-8.45137	9.78256	9.81276	28133	85	406	12	2.95567	0.840523	408|5683|5692|5700|5701|5710|5711|5716|5718|7314|8452|9491	ARRB1|PSMA2|PSMB4|PSMC1|PSMC2|PSMD4|PSMD5|PSMD10|PSMD12|UBB|CUL3|PSMF1	-6.21303	0	1	0	0	-21.1255	20.7879
1	1	0	-6.2455	-4.38626	0	R-HSA-5658442	M110	2	0	Reactome Gene Sets	6	Regulation of RAS by GAPs		-8.44077	11.2092	10.1994	28133	68	406	11	2.70936	0.80576	5683|5692|5700|5701|5710|5711|5716|5718|7314|8452|9491	PSMA2|PSMB4|PSMC1|PSMC2|PSMD4|PSMD5|PSMD10|PSMD12|UBB|CUL3|PSMF1	-6.20572	0	1	0	0	-21.1255	20.7879
1	1	0	-5.60889	-6.7982	0	GO:0048002	M110	2	0	GO Biological Processes	19	antigen processing and presentation of peptide antigen	19_GO:0002376 immune system process	-8.41913	6.07208	8.57814	28133	194	406	17	4.18719	0.994055	829|1175|1211|1778|1780|5683|5692|5700|5701|5710|5711|5716|5718|9491|10134|11258|51752	CAPZA1|AP2S1|CLTA|DYNC1H1|DYNC1I1|PSMA2|PSMB4|PSMC1|PSMC2|PSMD4|PSMD5|PSMD10|PSMD12|PSMF1|BCAP31|DCTN3|ERAP1	-6.18733	0	1	0	0	-21.1255	20.7879
1	1	1	-5.42994	-3.64521	-2.1142	R-HSA-169911	M111	3	0	Reactome Gene Sets	6	Regulation of Apoptosis		-8.4049	13.0742	10.6465	28133	53	406	10	2.46305	0.769234	5683|5692|5700|5701|5710|5711|5716|5718|7314|9491	PSMA2|PSMB4|PSMC1|PSMC2|PSMD4|PSMD5|PSMD10|PSMD12|UBB|PSMF1	-6.17633	0	1	0	0	-21.1255	20.7879
1	1	1	-5.27902	-4.35984	-2.14955	GO:0006520	M111	3	0	GO Biological Processes	19	cellular amino acid metabolic process	19_GO:0008152 metabolic process	-8.34972	4.36641	7.83346	28133	365	406	23	5.66502	1.14729	445|493|586|1629|2184|2875|4594|4842|5683|5692|5700|5701|5710|5711|5716|5718|7263|9491|10994|23498|25828|29968|51520	ASS1|ATP2B4|BCAT1|DBT|FAH|GPT|MMUT|NOS1|PSMA2|PSMB4|PSMC1|PSMC2|PSMD4|PSMD5|PSMD10|PSMD12|TST|PSMF1|ILVBL|HAAO|TXN2|PSAT1|LARS1	-6.1307	0	1	0	0	-21.1255	20.7879
1	1	1	-5.38927	-3.61367	-2.09179	R-HSA-8854050	M111	3	0	Reactome Gene Sets	6	FBXL7 down-regulates AURKA during mitotic entry and in early mitosis		-8.32154	12.8321	10.5312	28133	54	406	10	2.46305	0.769234	5683|5692|5700|5701|5710|5711|5716|5718|7314|9491	PSMA2|PSMB4|PSMC1|PSMC2|PSMD4|PSMD5|PSMD10|PSMD12|UBB|PSMF1	-6.10876	0	1	0	0	-21.1255	20.7879
1	1	1	-5.38927	-3.61367	-2.09179	R-HSA-9604323	M111	3	0	Reactome Gene Sets	6	Negative regulation of NOTCH4 signaling		-8.32154	12.8321	10.5312	28133	54	406	10	2.46305	0.769234	5683|5692|5700|5701|5710|5711|5716|5718|7314|9491	PSMA2|PSMB4|PSMC1|PSMC2|PSMD4|PSMD5|PSMD10|PSMD12|UBB|PSMF1	-6.10876	0	1	0	0	-21.1255	20.7879
1	1	0	-5.58197	-3.85044	0	R-HSA-450531	M110	2	0	Reactome Gene Sets	6	Regulation of mRNA stability by proteins that bind AU-rich elements		-8.27487	9.44906	9.60581	28133	88	406	12	2.95567	0.840523	1994|5683|5692|5700|5701|5710|5711|5716|5718|7314|8570|9491	ELAVL1|PSMA2|PSMB4|PSMC1|PSMC2|PSMD4|PSMD5|PSMD10|PSMD12|UBB|KHSRP|PSMF1	-6.06825	0	1	0	0	-21.1255	20.7879
1	1	1	-5.3494	-3.58277	-2.06983	R-HSA-174113	M111	3	0	Reactome Gene Sets	6	SCF-beta-TrCP mediated degradation of Emi1		-8.23996	12.5987	10.4189	28133	55	406	10	2.46305	0.769234	5683|5692|5700|5701|5710|5711|5716|5718|7314|9491	PSMA2|PSMB4|PSMC1|PSMC2|PSMD4|PSMD5|PSMD10|PSMD12|UBB|PSMF1	-6.03942	0	1	0	0	-21.1255	20.7879
1	1	1	-5.3494	-3.58277	-2.06983	R-HSA-4641257	M111	3	0	Reactome Gene Sets	6	Degradation of AXIN		-8.23996	12.5987	10.4189	28133	55	406	10	2.46305	0.769234	5683|5692|5700|5701|5710|5711|5716|5718|7314|9491	PSMA2|PSMB4|PSMC1|PSMC2|PSMD4|PSMD5|PSMD10|PSMD12|UBB|PSMF1	-6.03942	0	1	0	0	-21.1255	20.7879
1	1	1	-4.80066	-3.15831	-2.67284	WP2359	M111	3	0	WikiPathways	27	Parkin-Ubiquitin Proteasomal System pathway		-8.23482	10.7356	9.93899	28133	71	406	11	2.70936	0.80576	5700|5701|5710|5711|5716|5718|7332|10383|84617|84790|203068	PSMC1|PSMC2|PSMD4|PSMD5|PSMD10|PSMD12|UBE2L3|TUBB4B|TUBB6|TUBA1C|TUBB	-6.03728	0	1	0	0	-21.1255	20.7879
1	1	1	-4.51558	-5.22138	-4.13348	R-HSA-1280218	M111	3	0	Reactome Gene Sets	6	Adaptive Immune System		-8.2104	3.11636	7.13787	28133	756	406	34	8.37438	1.37474	805|829|1175|1211|1278|1778|1780|4345|5478|5683|5692|5700|5701|5710|5711|5716|5718|5879|6714|6923|7087|7314|7332|7525|8452|9491|10134|10383|10384|11258|51752|55740|84617|84790	CALM2|CAPZA1|AP2S1|CLTA|COL1A2|DYNC1H1|DYNC1I1|CD200|PPIA|PSMA2|PSMB4|PSMC1|PSMC2|PSMD4|PSMD5|PSMD10|PSMD12|RAC1|SRC|ELOB|ICAM5|UBB|UBE2L3|YES1|CUL3|PSMF1|BCAP31|TUBB4B|BTN3A3|DCTN3|ERAP1|ENAH|TUBB6|TUBA1C	-6.01882	0	1	0	0	-21.1255	20.7879
1	1	1	-5.31031	-3.55248	-2.04832	R-HSA-450408	M111	3	0	Reactome Gene Sets	6	AUF1 (hnRNP D0) binds and destabilizes mRNA		-8.16011	12.3738	10.3094	28133	56	406	10	2.46305	0.769234	5683|5692|5700|5701|5710|5711|5716|5718|7314|9491	PSMA2|PSMB4|PSMC1|PSMC2|PSMD4|PSMD5|PSMD10|PSMD12|UBB|PSMF1	-5.99153	0	1	0	0	-21.1255	20.7879
1	1	1	-5.31031	-3.55248	-2.04832	R-HSA-5362768	M111	3	0	Reactome Gene Sets	6	Hh mutants are degraded by ERAD		-8.16011	12.3738	10.3094	28133	56	406	10	2.46305	0.769234	5683|5692|5700|5701|5710|5711|5716|5718|7314|9491	PSMA2|PSMB4|PSMC1|PSMC2|PSMD4|PSMD5|PSMD10|PSMD12|UBB|PSMF1	-5.99153	0	1	0	0	-21.1255	20.7879
1	1	1	-5.27197	-3.52277	-2.02724	R-HSA-69541	M111	3	0	Reactome Gene Sets	6	Stabilization of p53		-8.08191	12.1567	10.2027	28133	57	406	10	2.46305	0.769234	5683|5692|5700|5701|5710|5711|5716|5718|7314|9491	PSMA2|PSMB4|PSMC1|PSMC2|PSMD4|PSMD5|PSMD10|PSMD12|UBB|PSMF1	-5.92166	0	1	0	0	-21.1255	20.7879
1	1	0	-5.99168	-3.06862	0	R-HSA-1234174	M110	2	0	Reactome Gene Sets	6	Cellular response to hypoxia		-7.97554	10.163	9.61504	28133	75	406	11	2.70936	0.80576	5683|5692|5700|5701|5710|5711|5716|5718|6923|7314|9491	PSMA2|PSMB4|PSMC1|PSMC2|PSMD4|PSMD5|PSMD10|PSMD12|ELOB|UBB|PSMF1	-5.83147	0	1	0	0	-21.1255	20.7879
1	0	1	-2.12762	0	-6.25149	GO:1901361	M101	2	0	GO Biological Processes	19	organic cyclic compound catabolic process	19_GO:0008152 metabolic process	-7.94414	3.03996	6.96853	28133	775	406	34	8.37438	1.37474	348|954|1312|1854|1994|2023|2184|2521|3146|4670|4860|4904|5138|5208|5224|5683|5692|5700|5701|5710|5711|5716|5718|6133|6193|7314|8570|9491|10591|23498|30833|57819|80349|201626	APOE|ENTPD2|COMT|DUT|ELAVL1|ENO1|FAH|FUS|HMGB1|HNRNPM|PNP|YBX1|PDE2A|PFKFB2|PGAM2|PSMA2|PSMB4|PSMC1|PSMC2|PSMD4|PSMD5|PSMD10|PSMD12|RPL9|RPS5|UBB|KHSRP|PSMF1|DNPH1|HAAO|NT5C|LSM2|WDR61|PDE12	-5.80535	0	1	0	0	-21.1255	20.7879
1	1	0	-5.19742	-3.46503	0	R-HSA-5387390	M110	2	0	Reactome Gene Sets	6	Hh mutants abrogate ligand secretion		-7.93021	11.7446	9.99714	28133	59	406	10	2.46305	0.769234	5683|5692|5700|5701|5710|5711|5716|5718|7314|9491	PSMA2|PSMB4|PSMC1|PSMC2|PSMD4|PSMD5|PSMD10|PSMD12|UBB|PSMF1	-5.79919	0	1	0	0	-21.1255	20.7879
1	1	0	-5.19742	-3.46503	0	R-HSA-5676590	M110	2	0	Reactome Gene Sets	6	NIK-->noncanonical NF-kB signaling		-7.93021	11.7446	9.99714	28133	59	406	10	2.46305	0.769234	5683|5692|5700|5701|5710|5711|5716|5718|7314|9491	PSMA2|PSMB4|PSMC1|PSMC2|PSMD4|PSMD5|PSMD10|PSMD12|UBB|PSMF1	-5.79919	0	1	0	0	-21.1255	20.7879
1	1	0	-5.19742	-3.46503	0	R-HSA-68827	M110	2	0	Reactome Gene Sets	6	CDT1 association with the CDC6:ORC:origin complex		-7.93021	11.7446	9.99714	28133	59	406	10	2.46305	0.769234	5683|5692|5700|5701|5710|5711|5716|5718|7314|9491	PSMA2|PSMB4|PSMC1|PSMC2|PSMD4|PSMD5|PSMD10|PSMD12|UBB|PSMF1	-5.79919	0	1	0	0	-21.1255	20.7879
1	1	1	-5.93483	-3.46408	-2.53992	GO:0070482	M111	3	0	GO Biological Processes	19	response to oxygen levels	19_GO:0050896 response to stimulus	-7.91497	4.13959	7.50584	28133	385	406	23	5.66502	1.14729	210|358|952|2023|2185|4842|5066|5300|5683|5692|5700|5701|5710|5711|5716|5718|6714|6923|7314|9491|10525|11331|25828	ALAD|AQP1|CD38|ENO1|PTK2B|NOS1|PAM|PIN1|PSMA2|PSMB4|PSMC1|PSMC2|PSMD4|PSMD5|PSMD10|PSMD12|SRC|ELOB|UBB|PSMF1|HYOU1|PHB2|TXN2	-5.78651	0	1	0	0	-21.1255	20.7879
1	1	0	-5.16116	-3.43695	0	R-HSA-187577	M110	2	0	Reactome Gene Sets	6	SCF(Skp2)-mediated degradation of p27/p21		-7.8566	11.5489	9.89802	28133	60	406	10	2.46305	0.769234	5683|5692|5700|5701|5710|5711|5716|5718|7314|9491	PSMA2|PSMB4|PSMC1|PSMC2|PSMD4|PSMD5|PSMD10|PSMD12|UBB|PSMF1	-5.74585	0	1	0	0	-21.1255	20.7879
1	1	0	-5.16116	-3.43695	0	R-HSA-5607761	M110	2	0	Reactome Gene Sets	6	Dectin-1 mediated noncanonical NF-kB signaling		-7.8566	11.5489	9.89802	28133	60	406	10	2.46305	0.769234	5683|5692|5700|5701|5710|5711|5716|5718|7314|9491	PSMA2|PSMB4|PSMC1|PSMC2|PSMD4|PSMD5|PSMD10|PSMD12|UBB|PSMF1	-5.74585	0	1	0	0	-21.1255	20.7879
1	1	0	-5.16116	-3.43695	0	R-HSA-5610780	M110	2	0	Reactome Gene Sets	6	Degradation of GLI1 by the proteasome		-7.8566	11.5489	9.89802	28133	60	406	10	2.46305	0.769234	5683|5692|5700|5701|5710|5711|5716|5718|7314|9491	PSMA2|PSMB4|PSMC1|PSMC2|PSMD4|PSMD5|PSMD10|PSMD12|UBB|PSMF1	-5.74585	0	1	0	0	-21.1255	20.7879
1	1	0	-5.16116	-3.43695	0	R-HSA-5610783	M110	2	0	Reactome Gene Sets	6	Degradation of GLI2 by the proteasome		-7.8566	11.5489	9.89802	28133	60	406	10	2.46305	0.769234	5683|5692|5700|5701|5710|5711|5716|5718|7314|9491	PSMA2|PSMB4|PSMC1|PSMC2|PSMD4|PSMD5|PSMD10|PSMD12|UBB|PSMF1	-5.74585	0	1	0	0	-21.1255	20.7879
1	1	0	-5.16116	-3.43695	0	R-HSA-5610785	M110	2	0	Reactome Gene Sets	6	GLI3 is processed to GLI3R by the proteasome		-7.8566	11.5489	9.89802	28133	60	406	10	2.46305	0.769234	5683|5692|5700|5701|5710|5711|5716|5718|7314|9491	PSMA2|PSMB4|PSMC1|PSMC2|PSMD4|PSMD5|PSMD10|PSMD12|UBB|PSMF1	-5.74585	0	1	0	0	-21.1255	20.7879
1	1	0	-5.92385	-3.02574	0	GO:0061418	M110	2	0	GO Biological Processes	19	regulation of transcription from RNA polymerase II promoter in response to hypoxia	19_GO:0050896 response to stimulus	-7.8519	9.89901	9.46207	28133	77	406	11	2.70936	0.80576	5683|5692|5700|5701|5710|5711|5716|5718|6923|7314|9491	PSMA2|PSMB4|PSMC1|PSMC2|PSMD4|PSMD5|PSMD10|PSMD12|ELOB|UBB|PSMF1	-5.74585	0	1	0	0	-21.1255	20.7879
1	1	0	-5.12554	-3.40939	0	R-HSA-5678895	M110	2	0	Reactome Gene Sets	6	Defective CFTR causes cystic fibrosis		-7.78442	11.3595	9.80122	28133	61	406	10	2.46305	0.769234	5683|5692|5700|5701|5710|5711|5716|5718|7314|9491	PSMA2|PSMB4|PSMC1|PSMC2|PSMD4|PSMD5|PSMD10|PSMD12|UBB|PSMF1	-5.69033	0	1	0	0	-21.1255	20.7879
1	1	1	-4.6834	-3.1568	-2.48812	GO:0043488	M111	3	0	GO Biological Processes	19	regulation of mRNA stability	19_GO:0048519 negative regulation of biological process	-7.77867	5.89729	8.15256	28133	188	406	16	3.94089	0.965613	1994|2521|4670|4904|5683|5692|5700|5701|5710|5711|5716|5718|7314|8570|9491|201626	ELAVL1|FUS|HNRNPM|YBX1|PSMA2|PSMB4|PSMC1|PSMC2|PSMD4|PSMD5|PSMD10|PSMD12|UBB|KHSRP|PSMF1|PDE12	-5.68693	0	1	0	0	-21.1255	20.7879
1	1	1	-4.47	-3.66015	-2.71878	GO:0043687	M111	3	0	GO Biological Processes	19	post-translational protein modification	19_GO:0008152 metabolic process	-7.72901	4.21118	7.44107	28133	362	406	22	5.41872	1.12354	102|348|813|1000|2873|3371|4924|5683|5692|5700|5701|5710|5711|5716|5718|5954|6923|7347|7857|8452|8883|9491	ADAM10|APOE|CALU|CDH2|GPS1|TNC|NUCB1|PSMA2|PSMB4|PSMC1|PSMC2|PSMD4|PSMD5|PSMD10|PSMD12|RCN1|ELOB|UCHL3|SCG2|CUL3|NAE1|PSMF1	-5.64194	0	1	0	0	-21.1255	20.7879
1	1	0	-6.48667	-4.58156	0	GO:0006521	M110	2	0	GO Biological Processes	19	regulation of cellular amino acid metabolic process	19_GO:0050789 regulation of biological process	-7.7136	11.1763	9.70664	28133	62	406	10	2.46305	0.769234	493|5683|5692|5700|5701|5710|5711|5716|5718|9491	ATP2B4|PSMA2|PSMB4|PSMC1|PSMC2|PSMD4|PSMD5|PSMD10|PSMD12|PSMF1	-5.63573	0	1	0	0	-21.1255	20.7879
1	1	1	-3.78362	-2.28753	-2.89076	WP183	M111	3	0	WikiPathways	27	Proteasome Degradation		-7.7136	11.1763	9.70664	28133	62	406	10	2.46305	0.769234	5683|5692|5700|5701|5710|5711|5716|5718|7314|7347	PSMA2|PSMB4|PSMC1|PSMC2|PSMD4|PSMD5|PSMD10|PSMD12|UBB|UCHL3	-5.63573	0	1	0	0	-21.1255	20.7879
1	1	1	-5.82678	-5.58543	-3.02331	R-HSA-5663202	M111	3	0	Reactome Gene Sets	6	Diseases of signal transduction by growth factor receptors and second messengers		-7.70851	4.03479	7.35024	28133	395	406	23	5.66502	1.14729	102|408|805|1487|2244|5605|5683|5692|5700|5701|5710|5711|5716|5718|5879|6714|7314|7450|7525|8546|8826|9491|399687	ADAM10|ARRB1|CALM2|CTBP1|FGB|MAP2K2|PSMA2|PSMB4|PSMC1|PSMC2|PSMD4|PSMD5|PSMD10|PSMD12|RAC1|SRC|UBB|VWF|YES1|AP3B1|IQGAP1|PSMF1|MYO18A	-5.63291	0	1	0	0	-21.1255	20.7879
1	1	1	-4.93155	-6.22026	-2.08013	GO:0044257	M111	3	0	GO Biological Processes	19	cellular protein catabolic process	19_GO:0008152 metabolic process	-7.64743	2.95604	6.77878	28133	797	406	34	8.37438	1.37474	210|348|408|1175|1211|2185|4035|5094|5582|5683|5692|5700|5701|5710|5711|5716|5718|5886|5962|6923|7314|7332|7347|7430|7874|8239|8452|9491|10134|23321|29978|54472|55737|57095	ALAD|APOE|ARRB1|AP2S1|CLTA|PTK2B|LRP1|PCBP2|PRKCG|PSMA2|PSMB4|PSMC1|PSMC2|PSMD4|PSMD5|PSMD10|PSMD12|RAD23A|RDX|ELOB|UBB|UBE2L3|UCHL3|EZR|USP7|USP9X|CUL3|PSMF1|BCAP31|TRIM2|UBQLN2|TOLLIP|VPS35|PITHD1	-5.57812	0	1	0	0	-21.1255	20.7879
1	1	1	-5.23328	-3.5701	-2.97256	R-HSA-5607764	M111	3	0	Reactome Gene Sets	6	CLEC7A (Dectin-1) signaling		-7.5843	8.23284	8.8116	28133	101	406	12	2.95567	0.840523	805|5683|5692|5700|5701|5710|5711|5716|5718|6714|7314|9491	CALM2|PSMA2|PSMB4|PSMC1|PSMC2|PSMD4|PSMD5|PSMD10|PSMD12|SRC|UBB|PSMF1	-5.52448	0	1	0	0	-21.1255	20.7879
1	1	0	-5.02237	-3.32957	0	R-HSA-174084	M110	2	0	Reactome Gene Sets	6	Autodegradation of Cdh1 by Cdh1:APC/C		-7.57589	10.827	9.52383	28133	64	406	10	2.46305	0.769234	5683|5692|5700|5701|5710|5711|5716|5718|7314|9491	PSMA2|PSMB4|PSMC1|PSMC2|PSMD4|PSMD5|PSMD10|PSMD12|UBB|PSMF1	-5.52448	0	1	0	0	-21.1255	20.7879
1	1	0	-5.02237	-3.32957	0	R-HSA-4608870	M110	2	0	Reactome Gene Sets	6	Asymmetric localization of PCP proteins		-7.57589	10.827	9.52383	28133	64	406	10	2.46305	0.769234	5683|5692|5700|5701|5710|5711|5716|5718|7314|9491	PSMA2|PSMB4|PSMC1|PSMC2|PSMD4|PSMD5|PSMD10|PSMD12|UBB|PSMF1	-5.52448	0	1	0	0	-21.1255	20.7879
1	1	1	-4.49612	-3.99579	-2.44568	R-HSA-9013694	M111	3	0	Reactome Gene Sets	6	Signaling by NOTCH4		-7.55859	9.29542	9.10296	28133	82	406	11	2.70936	0.80576	102|5683|5692|5700|5701|5710|5711|5716|5718|7314|9491	ADAM10|PSMA2|PSMB4|PSMC1|PSMC2|PSMD4|PSMD5|PSMD10|PSMD12|UBB|PSMF1	-5.50932	0	1	0	0	-21.1255	20.7879
1	0	1	-2.84303	0	-6.08651	GO:0044270	M101	2	0	GO Biological Processes	19	cellular nitrogen compound catabolic process	19_GO:0008152 metabolic process	-7.55283	3.05424	6.7858	28133	726	406	32	7.88177	1.33728	954|1854|1994|2023|2521|3146|4670|4860|4904|5138|5208|5224|5683|5692|5700|5701|5710|5711|5716|5718|6133|6193|7263|7314|8570|9491|10591|23498|30833|57819|80349|201626	ENTPD2|DUT|ELAVL1|ENO1|FUS|HMGB1|HNRNPM|PNP|YBX1|PDE2A|PFKFB2|PGAM2|PSMA2|PSMB4|PSMC1|PSMC2|PSMD4|PSMD5|PSMD10|PSMD12|RPL9|RPS5|TST|UBB|KHSRP|PSMF1|DNPH1|HAAO|NT5C|LSM2|WDR61|PDE12	-5.50731	0	1	0	0	-21.1255	20.7879
1	1	1	-4.337	-4.12556	-2.47235	GO:0045088	M111	3	0	GO Biological Processes	19	regulation of innate immune response	19_GO:0002376 immune system process	-7.55235	3.6858	7.10535	28133	470	406	25	6.15764	1.19301	348|2244|3146|5272|5591|5683|5692|5700|5701|5710|5711|5716|5718|6271|6714|7314|8546|9491|9782|9868|10211|11331|23705|51752|57506	APOE|FGB|HMGB1|SERPINB9|PRKDC|PSMA2|PSMB4|PSMC1|PSMC2|PSMD4|PSMD5|PSMD10|PSMD12|S100A1|SRC|UBB|AP3B1|PSMF1|MATR3|TOMM70|FLOT1|PHB2|CADM1|ERAP1|MAVS	-5.50731	0	1	0	0	-21.1255	20.7879
1	1	1	-3.87252	-3.16159	-2.9137	GO:0002218	M111	3	0	GO Biological Processes	19	activation of innate immune response	19_GO:0002376 immune system process	-7.54665	4.29249	7.38008	28133	339	406	21	5.17241	1.09913	2244|3146|5591|5683|5692|5700|5701|5710|5711|5716|5718|6271|6714|7314|8546|9491|9782|9868|10211|11331|57506	FGB|HMGB1|PRKDC|PSMA2|PSMB4|PSMC1|PSMC2|PSMD4|PSMD5|PSMD10|PSMD12|S100A1|SRC|UBB|AP3B1|PSMF1|MATR3|TOMM70|FLOT1|PHB2|MAVS	-5.50371	0	1	0	0	-21.1255	20.7879
1	1	1	-3.60482	-5.54987	-2.46585	GO:0062012	M111	3	0	GO Biological Processes	19	regulation of small molecule metabolic process	19_GO:0050789 regulation of biological process	-7.53439	3.67798	7.09231	28133	471	406	25	6.15764	1.19301	348|493|1347|2023|2185|2224|2875|3146|4199|4842|5208|5683|5692|5700|5701|5710|5711|5716|5718|6647|6714|7874|9491|23541|201626	APOE|ATP2B4|COX7A2|ENO1|PTK2B|FDPS|GPT|HMGB1|ME1|NOS1|PFKFB2|PSMA2|PSMB4|PSMC1|PSMC2|PSMD4|PSMD5|PSMD10|PSMD12|SOD1|SRC|USP7|PSMF1|SEC14L2|PDE12	-5.49563	0	1	0	0	-21.1255	20.7879
1	1	0	-5.60133	-3.77816	0	R-HSA-1236978	M110	2	0	Reactome Gene Sets	6	Cross-presentation of soluble exogenous antigens (endosomes)		-7.51341	12.7273	9.94211	28133	49	406	9	2.21675	0.73068	5683|5692|5700|5701|5710|5711|5716|5718|9491	PSMA2|PSMB4|PSMC1|PSMC2|PSMD4|PSMD5|PSMD10|PSMD12|PSMF1	-5.47879	0	1	0	0	-21.1255	20.7879
1	1	0	-4.98913	-3.30388	0	R-HSA-5358346	M110	2	0	Reactome Gene Sets	6	Hedgehog ligand biogenesis		-7.50891	10.6605	9.43542	28133	65	406	10	2.46305	0.769234	5683|5692|5700|5701|5710|5711|5716|5718|7314|9491	PSMA2|PSMB4|PSMC1|PSMC2|PSMD4|PSMD5|PSMD10|PSMD12|UBB|PSMF1	-5.47634	0	1	0	0	-21.1255	20.7879
1	1	0	-5.73127	-3.97077	0	GO:0031145	M110	2	0	GO Biological Processes	19	anaphase-promoting complex-dependent catabolic process	19_GO:0008152 metabolic process	-7.50245	9.18342	9.03482	28133	83	406	11	2.70936	0.80576	5683|5692|5700|5701|5710|5711|5716|5718|7314|8452|9491	PSMA2|PSMB4|PSMC1|PSMC2|PSMD4|PSMD5|PSMD10|PSMD12|UBB|CUL3|PSMF1	-5.47598	0	1	0	0	-21.1255	20.7879
1	1	0	-5.73127	-2.90417	0	R-HSA-195253	M110	2	0	Reactome Gene Sets	6	Degradation of beta-catenin by the destruction complex		-7.50245	9.18342	9.03482	28133	83	406	11	2.70936	0.80576	1487|5683|5692|5700|5701|5710|5711|5716|5718|7314|9491	CTBP1|PSMA2|PSMB4|PSMC1|PSMC2|PSMD4|PSMD5|PSMD10|PSMD12|UBB|PSMF1	-5.47598	0	1	0	0	-21.1255	20.7879
1	1	1	-4.36027	-2.2722	-2.62359	R-HSA-71291	M111	3	0	Reactome Gene Sets	6	Metabolism of amino acids and derivatives		-7.47679	4.07606	7.24672	28133	374	406	22	5.41872	1.12354	445|586|1629|2184|2875|5683|5692|5700|5701|5710|5711|5716|5718|6133|6193|6520|7263|9491|23498|25828|29968|51520	ASS1|BCAT1|DBT|FAH|GPT|PSMA2|PSMB4|PSMC1|PSMC2|PSMD4|PSMD5|PSMD10|PSMD12|RPL9|RPS5|SLC3A2|TST|PSMF1|HAAO|TXN2|PSAT1|LARS1	-5.45233	0	1	0	0	-21.1255	20.7879
1	1	1	-4.53909	-3.03985	-2.37829	GO:0043487	M111	3	0	GO Biological Processes	19	regulation of RNA stability	19_GO:0050789 regulation of biological process	-7.46063	5.59944	7.85915	28133	198	406	16	3.94089	0.965613	1994|2521|4670|4904|5683|5692|5700|5701|5710|5711|5716|5718|7314|8570|9491|201626	ELAVL1|FUS|HNRNPM|YBX1|PSMA2|PSMB4|PSMC1|PSMC2|PSMD4|PSMD5|PSMD10|PSMD12|UBB|KHSRP|PSMF1|PDE12	-5.4408	0	1	0	0	-21.1255	20.7879
1	1	0	-4.95644	-3.27861	0	R-HSA-69563	M110	2	0	Reactome Gene Sets	6	p53-Dependent G1 DNA Damage Response		-7.44312	10.499	9.34893	28133	66	406	10	2.46305	0.769234	5683|5692|5700|5701|5710|5711|5716|5718|7314|9491	PSMA2|PSMB4|PSMC1|PSMC2|PSMD4|PSMD5|PSMD10|PSMD12|UBB|PSMF1	-5.42861	0	1	0	0	-21.1255	20.7879
1	1	0	-4.95644	-3.27861	0	R-HSA-69580	M110	2	0	Reactome Gene Sets	6	p53-Dependent G1/S DNA damage checkpoint		-7.44312	10.499	9.34893	28133	66	406	10	2.46305	0.769234	5683|5692|5700|5701|5710|5711|5716|5718|7314|9491	PSMA2|PSMB4|PSMC1|PSMC2|PSMD4|PSMD5|PSMD10|PSMD12|UBB|PSMF1	-5.42861	0	1	0	0	-21.1255	20.7879
1	1	0	-4.72157	-2.96533	0	CORUM:193	M110	2	0	CORUM	33	PA700-20S-PA28 complex		-7.42801	15.3985	10.4604	28133	36	406	8	1.97044	0.689759	5683|5692|5700|5701|5710|5711|5716|5718	PSMA2|PSMB4|PSMC1|PSMC2|PSMD4|PSMD5|PSMD10|PSMD12	-5.41741	0	1	0	0	-21.1255	20.7879
1	1	1	-4.0221	-6.64603	-2.20979	GO:0016055	M111	3	0	GO Biological Processes	19	Wnt signaling pathway	19_GO:0023052 signaling	-7.41077	3.51193	6.94811	28133	513	406	26	6.40394	1.21504	348|1000|1175|2775|3728|4035|5300|5683|5692|5700|5701|5710|5711|5716|5718|5879|6714|7314|8452|9491|23043|23499|55737|80349|219287|219771	APOE|CDH2|AP2S1|GNAO1|JUP|LRP1|PIN1|PSMA2|PSMB4|PSMC1|PSMC2|PSMD4|PSMD5|PSMD10|PSMD12|RAC1|SRC|UBB|CUL3|PSMF1|TNIK|MACF1|VPS35|WDR61|AMER2|CCNY	-5.40212	0	1	0	0	-21.1255	20.7879
1	1	0	-4.92429	-3.25377	0	R-HSA-1169091	M110	2	0	Reactome Gene Sets	6	Activation of NF-kappaB in B cells		-7.37849	10.3423	9.26426	28133	67	406	10	2.46305	0.769234	5683|5692|5700|5701|5710|5711|5716|5718|7314|9491	PSMA2|PSMB4|PSMC1|PSMC2|PSMD4|PSMD5|PSMD10|PSMD12|UBB|PSMF1	-5.3743	0	1	0	0	-21.1255	20.7879
1	1	1	-4.00825	-6.62451	-2.19837	GO:0198738	M111	3	0	GO Biological Processes	19	cell-cell signaling by wnt	19_GO:0023052 signaling	-7.37718	3.49829	6.92409	28133	515	406	26	6.40394	1.21504	348|1000|1175|2775|3728|4035|5300|5683|5692|5700|5701|5710|5711|5716|5718|5879|6714|7314|8452|9491|23043|23499|55737|80349|219287|219771	APOE|CDH2|AP2S1|GNAO1|JUP|LRP1|PIN1|PSMA2|PSMB4|PSMC1|PSMC2|PSMD4|PSMD5|PSMD10|PSMD12|RAC1|SRC|UBB|CUL3|PSMF1|TNIK|MACF1|VPS35|WDR61|AMER2|CCNY	-5.3743	0	1	0	0	-21.1255	20.7879
1	1	0	-5.51382	-3.71027	0	R-HSA-350562	M110	2	0	Reactome Gene Sets	6	Regulation of ornithine decarboxylase (ODC)		-7.35396	12.2282	9.71165	28133	51	406	9	2.21675	0.73068	5683|5692|5700|5701|5710|5711|5716|5718|9491	PSMA2|PSMB4|PSMC1|PSMC2|PSMD4|PSMD5|PSMD10|PSMD12|PSMF1	-5.35299	0	1	0	0	-21.1255	20.7879
1	1	0	-3.81784	-3.17895	0	GO:0000086	M110	2	0	GO Biological Processes	19	G2/M transition of mitotic cell cycle	19_GO:0009987 cellular process	-7.32738	4.8344	7.48707	28133	258	406	18	4.4335	1.02156	1778|5577|5683|5692|5700|5701|5710|5711|5716|5718|8883|9491|10383|10763|11258|22919|203068|219771	DYNC1H1|PRKAR2B|PSMA2|PSMB4|PSMC1|PSMC2|PSMD4|PSMD5|PSMD10|PSMD12|NAE1|PSMF1|TUBB4B|NES|DCTN3|MAPRE1|TUBB|CCNY	-5.33209	0	1	0	0	-21.1255	20.7879
1	1	0	-4.89265	-3.22932	0	R-HSA-174154	M110	2	0	Reactome Gene Sets	6	APC/C:Cdc20 mediated degradation of Securin		-7.31498	10.1902	9.18136	28133	68	406	10	2.46305	0.769234	5683|5692|5700|5701|5710|5711|5716|5718|7314|9491	PSMA2|PSMB4|PSMC1|PSMC2|PSMD4|PSMD5|PSMD10|PSMD12|UBB|PSMF1	-5.32529	0	1	0	0	-21.1255	20.7879
1	1	0	-4.89265	-3.22932	0	R-HSA-68867	M110	2	0	Reactome Gene Sets	6	Assembly of the pre-replicative complex		-7.31498	10.1902	9.18136	28133	68	406	10	2.46305	0.769234	5683|5692|5700|5701|5710|5711|5716|5718|7314|9491	PSMA2|PSMB4|PSMC1|PSMC2|PSMD4|PSMD5|PSMD10|PSMD12|UBB|PSMF1	-5.32529	0	1	0	0	-21.1255	20.7879
1	1	0	-4.89265	-3.22932	0	R-HSA-69615	M110	2	0	Reactome Gene Sets	6	G1/S DNA Damage Checkpoints		-7.31498	10.1902	9.18136	28133	68	406	10	2.46305	0.769234	5683|5692|5700|5701|5710|5711|5716|5718|7314|9491	PSMA2|PSMB4|PSMC1|PSMC2|PSMD4|PSMD5|PSMD10|PSMD12|UBB|PSMF1	-5.32529	0	1	0	0	-21.1255	20.7879
1	1	0	-4.46999	-3.80642	0	GO:0010389	M110	2	0	GO Biological Processes	19	regulation of G2/M transition of mitotic cell cycle	19_GO:0050789 regulation of biological process	-7.30893	5.46153	7.71983	28133	203	406	16	3.94089	0.965613	1778|5577|5683|5692|5700|5701|5710|5711|5716|5718|8883|9491|10383|11258|22919|203068	DYNC1H1|PRKAR2B|PSMA2|PSMB4|PSMC1|PSMC2|PSMD4|PSMD5|PSMD10|PSMD12|NAE1|PSMF1|TUBB4B|DCTN3|MAPRE1|TUBB	-5.32294	0	1	0	0	-21.1255	20.7879
1	1	0	-3.861	-5.12156	0	GO:0002478	M110	2	0	GO Biological Processes	19	antigen processing and presentation of exogenous peptide antigen	19_GO:0002376 immune system process	-7.30579	5.8723	7.86855	28133	177	406	15	3.69458	0.936149	829|1175|1211|1778|1780|5683|5692|5700|5701|5710|5711|5716|5718|9491|11258	CAPZA1|AP2S1|CLTA|DYNC1H1|DYNC1I1|PSMA2|PSMB4|PSMC1|PSMC2|PSMD4|PSMD5|PSMD10|PSMD12|PSMF1|DCTN3	-5.32164	0	1	0	0	-21.1255	20.7879
1	1	1	-3.99123	-4.58399	-2.83988	R-HSA-68886	M111	3	0	Reactome Gene Sets	6	M Phase		-7.25885	3.81278	7.01097	28133	418	406	23	5.66502	1.14729	1778|1780|3020|5577|5683|5692|5700|5701|5710|5711|5716|5718|7314|8359|9491|10383|11258|22919|23122|26003|84617|84790|203068	DYNC1H1|DYNC1I1|H3-3A|PRKAR2B|PSMA2|PSMB4|PSMC1|PSMC2|PSMD4|PSMD5|PSMD10|PSMD12|UBB|H4C1|PSMF1|TUBB4B|DCTN3|MAPRE1|CLASP2|GORASP2|TUBB6|TUBA1C|TUBB	-5.28196	0	1	0	0	-21.1255	20.7879
1	1	1	-3.91983	-3.48967	-2.72938	GO:0002253	M111	3	0	GO Biological Processes	19	activation of immune response	19_GO:0002376 immune system process	-7.25467	2.96441	6.58929	28133	748	406	32	7.88177	1.33728	952|966|2244|3146|5591|5683|5692|5700|5701|5710|5711|5716|5718|5879|6271|6714|7070|7314|7430|7525|8546|9491|9782|9868|10095|10096|10211|10384|10787|11331|29085|57506	CD38|CD59|FGB|HMGB1|PRKDC|PSMA2|PSMB4|PSMC1|PSMC2|PSMD4|PSMD5|PSMD10|PSMD12|RAC1|S100A1|SRC|THY1|UBB|EZR|YES1|AP3B1|PSMF1|MATR3|TOMM70|ARPC1B|ACTR3|FLOT1|BTN3A3|NCKAP1|PHB2|PHPT1|MAVS	-5.27958	0	1	0	0	-21.1255	20.7879
1	1	0	-4.8615	-3.20528	0	R-HSA-8948751	M110	2	0	Reactome Gene Sets	6	Regulation of PTEN stability and activity		-7.25255	10.0425	9.10016	28133	69	406	10	2.46305	0.769234	5683|5692|5700|5701|5710|5711|5716|5718|7314|9491	PSMA2|PSMB4|PSMC1|PSMC2|PSMD4|PSMD5|PSMD10|PSMD12|UBB|PSMF1	-5.27925	0	1	0	0	-21.1255	20.7879
1	0	1	-2.52935	0	-5.98203	GO:0034655	M101	2	0	GO Biological Processes	19	nucleobase-containing compound catabolic process	19_GO:0008152 metabolic process	-7.24754	3.09805	6.65615	28133	671	406	30	7.38916	1.29827	954|1854|1994|2023|2521|3146|4670|4860|4904|5138|5208|5224|5683|5692|5700|5701|5710|5711|5716|5718|6133|6193|7314|8570|9491|10591|30833|57819|80349|201626	ENTPD2|DUT|ELAVL1|ENO1|FUS|HMGB1|HNRNPM|PNP|YBX1|PDE2A|PFKFB2|PGAM2|PSMA2|PSMB4|PSMC1|PSMC2|PSMD4|PSMD5|PSMD10|PSMD12|RPL9|RPS5|UBB|KHSRP|PSMF1|DNPH1|NT5C|LSM2|WDR61|PDE12	-5.2778	0	1	0	0	-21.1255	20.7879
1	1	1	-4.42944	-2.95123	-2.29534	GO:0071456	M111	3	0	GO Biological Processes	19	cellular response to hypoxia	19_GO:0050896 response to stimulus	-7.22011	5.38199	7.63844	28133	206	406	16	3.94089	0.965613	358|2023|5683|5692|5700|5701|5710|5711|5716|5718|6714|6923|7314|9491|10525|11331	AQP1|ENO1|PSMA2|PSMB4|PSMC1|PSMC2|PSMD4|PSMD5|PSMD10|PSMD12|SRC|ELOB|UBB|PSMF1|HYOU1|PHB2	-5.25214	0	1	0	0	-21.1255	20.7879
1	1	1	-4.08064	-3.43101	-2.66262	R-HSA-162906	M111	3	0	Reactome Gene Sets	6	HIV Infection		-7.20805	5.03411	7.49849	28133	234	406	17	4.18719	0.994055	291|293|1175|5478|5683|5692|5700|5701|5710|5711|5716|5718|5879|6923|7314|9491|51606	SLC25A4|SLC25A6|AP2S1|PPIA|PSMA2|PSMB4|PSMC1|PSMC2|PSMD4|PSMD5|PSMD10|PSMD12|RAC1|ELOB|UBB|PSMF1|ATP6V1H	-5.24184	0	1	0	0	-21.1255	20.7879
1	1	1	-4.3246	-3.82729	-2.31867	R-HSA-5687128	M111	3	0	Reactome Gene Sets	6	MAPK6/MAPK4 signaling		-7.18148	8.56432	8.64881	28133	89	406	11	2.70936	0.80576	5683|5692|5700|5701|5710|5711|5716|5718|5879|7314|9491	PSMA2|PSMB4|PSMC1|PSMC2|PSMD4|PSMD5|PSMD10|PSMD12|RAC1|UBB|PSMF1	-5.21877	0	1	0	0	-21.1255	20.7879
1	1	1	-4.05758	-4.22539	-3.32431	R-HSA-157118	M111	3	0	Reactome Gene Sets	6	Signaling by NOTCH		-7.15436	4.99145	7.45109	28133	236	406	17	4.18719	0.994055	102|408|2173|3020|4904|5683|5692|5700|5701|5710|5711|5716|5718|7314|8359|9491|26960	ADAM10|ARRB1|FABP7|H3-3A|YBX1|PSMA2|PSMB4|PSMC1|PSMC2|PSMD4|PSMD5|PSMD10|PSMD12|UBB|H4C1|PSMF1|NBEA	-5.19686	0	1	0	0	-21.1255	20.7879
1	1	1	-4.05758	-3.40884	-3.32431	R-HSA-68882	M111	3	0	Reactome Gene Sets	6	Mitotic Anaphase		-7.15436	4.99145	7.45109	28133	236	406	17	4.18719	0.994055	1778|1780|5683|5692|5700|5701|5710|5711|5716|5718|7314|9491|10383|22919|23122|84617|84790	DYNC1H1|DYNC1I1|PSMA2|PSMB4|PSMC1|PSMC2|PSMD4|PSMD5|PSMD10|PSMD12|UBB|PSMF1|TUBB4B|MAPRE1|CLASP2|TUBB6|TUBA1C	-5.19686	0	1	0	0	-21.1255	20.7879
1	1	0	-4.80066	-3.15831	0	R-HSA-68949	M110	2	0	Reactome Gene Sets	6	Orc1 removal from chromatin		-7.13081	9.75959	8.94264	28133	71	406	10	2.46305	0.769234	5683|5692|5700|5701|5710|5711|5716|5718|7314|9491	PSMA2|PSMB4|PSMC1|PSMC2|PSMD4|PSMD5|PSMD10|PSMD12|UBB|PSMF1	-5.17537	0	1	0	0	-21.1255	20.7879
1	1	1	-4.04613	-3.39784	-3.3122	R-HSA-2555396	M111	3	0	Reactome Gene Sets	6	Mitotic Metaphase and Anaphase		-7.12773	4.97039	7.4276	28133	237	406	17	4.18719	0.994055	1778|1780|5683|5692|5700|5701|5710|5711|5716|5718|7314|9491|10383|22919|23122|84617|84790	DYNC1H1|DYNC1I1|PSMA2|PSMB4|PSMC1|PSMC2|PSMD4|PSMD5|PSMD10|PSMD12|UBB|PSMF1|TUBB4B|MAPRE1|CLASP2|TUBB6|TUBA1C	-5.17537	0	1	0	0	-21.1255	20.7879
1	1	1	-4.37641	-2.90844	-2.25539	GO:0061013	M111	3	0	GO Biological Processes	19	regulation of mRNA catabolic process	19_GO:0048519 negative regulation of biological process	-7.10415	5.27947	7.53236	28133	210	406	16	3.94089	0.965613	1994|2521|4670|4904|5683|5692|5700|5701|5710|5711|5716|5718|7314|8570|9491|201626	ELAVL1|FUS|HNRNPM|YBX1|PSMA2|PSMB4|PSMC1|PSMC2|PSMD4|PSMD5|PSMD10|PSMD12|UBB|KHSRP|PSMF1|PDE12	-5.15551	0	1	0	0	-21.1255	20.7879
1	1	1	-4.27063	-3.5406	-2.68494	R-HSA-5688426	M111	3	0	Reactome Gene Sets	6	Deubiquitination		-7.1028	4.43289	7.19692	28133	297	406	19	4.6798	1.0482	408|5683|5692|5700|5701|5710|5711|5716|5718|5886|7314|7347|7874|8239|9491|9868|27430|55611|57506	ARRB1|PSMA2|PSMB4|PSMC1|PSMC2|PSMD4|PSMD5|PSMD10|PSMD12|RAD23A|UBB|UCHL3|USP7|USP9X|PSMF1|TOMM70|MAT2B|OTUB1|MAVS	-5.15551	0	1	0	0	-21.1255	20.7879
1	1	1	-4.97446	-3.36273	-2.77292	R-HSA-983705	M111	3	0	Reactome Gene Sets	6	Signaling by the B Cell Receptor (BCR)		-7.07736	7.42426	8.24332	28133	112	406	12	2.95567	0.840523	805|5478|5683|5692|5700|5701|5710|5711|5716|5718|7314|9491	CALM2|PPIA|PSMA2|PSMB4|PSMC1|PSMC2|PSMD4|PSMD5|PSMD10|PSMD12|UBB|PSMF1	-5.13343	0	1	0	0	-21.1255	20.7879
1	0	1	-2.31061	0	-6.09574	GO:0046700	M101	2	0	GO Biological Processes	19	heterocycle catabolic process	19_GO:0008152 metabolic process	-7.03896	2.96288	6.47941	28133	725	406	31	7.63547	1.31798	954|1854|1994|2023|2521|3146|4670|4860|4904|5138|5208|5224|5683|5692|5700|5701|5710|5711|5716|5718|6133|6193|7314|8570|9491|10591|23498|30833|57819|80349|201626	ENTPD2|DUT|ELAVL1|ENO1|FUS|HMGB1|HNRNPM|PNP|YBX1|PDE2A|PFKFB2|PGAM2|PSMA2|PSMB4|PSMC1|PSMC2|PSMD4|PSMD5|PSMD10|PSMD12|RPL9|RPS5|UBB|KHSRP|PSMF1|DNPH1|HAAO|NT5C|LSM2|WDR61|PDE12	-5.09669	0	1	0	0	-21.1255	20.7879
1	1	0	-4.74164	-3.11278	0	R-HSA-174184	M110	2	0	Reactome Gene Sets	6	Cdc20:Phospho-APC/C mediated degradation of Cyclin A		-7.01302	9.49221	8.79124	28133	73	406	10	2.46305	0.769234	5683|5692|5700|5701|5710|5711|5716|5718|7314|9491	PSMA2|PSMB4|PSMC1|PSMC2|PSMD4|PSMD5|PSMD10|PSMD12|UBB|PSMF1	-5.08008	0	1	0	0	-21.1255	20.7879
1	1	0	-4.74164	-3.11278	0	R-HSA-69017	M110	2	0	Reactome Gene Sets	6	CDK-mediated phosphorylation and removal of Cdc6		-7.01302	9.49221	8.79124	28133	73	406	10	2.46305	0.769234	5683|5692|5700|5701|5710|5711|5716|5718|7314|9491	PSMA2|PSMB4|PSMC1|PSMC2|PSMD4|PSMD5|PSMD10|PSMD12|UBB|PSMF1	-5.08008	0	1	0	0	-21.1255	20.7879
1	1	0	-4.74164	-3.11278	0	R-HSA-8939902	M110	2	0	Reactome Gene Sets	6	Regulation of RUNX2 expression and activity		-7.01302	9.49221	8.79124	28133	73	406	10	2.46305	0.769234	5683|5692|5700|5701|5710|5711|5716|5718|7314|9491	PSMA2|PSMB4|PSMC1|PSMC2|PSMD4|PSMD5|PSMD10|PSMD12|UBB|PSMF1	-5.08008	0	1	0	0	-21.1255	20.7879
1	1	1	-4.32451	-2.86662	-2.2164	GO:0036294	M111	3	0	GO Biological Processes	19	cellular response to decreased oxygen levels	19_GO:0050896 response to stimulus	-6.99089	5.18079	7.42895	28133	214	406	16	3.94089	0.965613	358|2023|5683|5692|5700|5701|5710|5711|5716|5718|6714|6923|7314|9491|10525|11331	AQP1|ENO1|PSMA2|PSMB4|PSMC1|PSMC2|PSMD4|PSMD5|PSMD10|PSMD12|SRC|ELOB|UBB|PSMF1|HYOU1|PHB2	-5.06174	0	1	0	0	-21.1255	20.7879
1	1	1	-3.39586	-2.71204	-2.99038	GO:0045089	M111	3	0	GO Biological Processes	19	positive regulation of innate immune response	19_GO:0002376 immune system process	-6.98404	3.82067	6.86665	28133	399	406	22	5.41872	1.12354	2244|3146|5591|5683|5692|5700|5701|5710|5711|5716|5718|6271|6714|7314|8546|9491|9782|9868|10211|11331|23705|57506	FGB|HMGB1|PRKDC|PSMA2|PSMB4|PSMC1|PSMC2|PSMD4|PSMD5|PSMD10|PSMD12|S100A1|SRC|UBB|AP3B1|PSMF1|MATR3|TOMM70|FLOT1|PHB2|CADM1|MAVS	-5.0565	0	1	0	0	-21.1255	20.7879
1	1	0	-4.71278	-3.09054	0	GO:1902036	M110	2	0	GO Biological Processes	19	regulation of hematopoietic stem cell differentiation	19_GO:0002376 immune system process	-6.95554	9.36393	8.71771	28133	74	406	10	2.46305	0.769234	5591|5683|5692|5700|5701|5710|5711|5716|5718|9491	PRKDC|PSMA2|PSMB4|PSMC1|PSMC2|PSMD4|PSMD5|PSMD10|PSMD12|PSMF1	-5.03802	0	1	0	0	-21.1255	20.7879
1	1	0	-4.71278	-3.09054	0	R-HSA-174178	M110	2	0	Reactome Gene Sets	6	APC/C:Cdh1 mediated degradation of Cdc20 and other APC/C:Cdh1 targeted proteins in late mitosis/early G1		-6.95554	9.36393	8.71771	28133	74	406	10	2.46305	0.769234	5683|5692|5700|5701|5710|5711|5716|5718|7314|9491	PSMA2|PSMB4|PSMC1|PSMC2|PSMD4|PSMD5|PSMD10|PSMD12|UBB|PSMF1	-5.03802	0	1	0	0	-21.1255	20.7879
1	1	0	-4.71278	-3.09054	0	R-HSA-179419	M110	2	0	Reactome Gene Sets	6	APC:Cdc20 mediated degradation of cell cycle proteins prior to satisfation of the cell cycle checkpoint		-6.95554	9.36393	8.71771	28133	74	406	10	2.46305	0.769234	5683|5692|5700|5701|5710|5711|5716|5718|7314|9491	PSMA2|PSMB4|PSMC1|PSMC2|PSMD4|PSMD5|PSMD10|PSMD12|UBB|PSMF1	-5.03802	0	1	0	0	-21.1255	20.7879
1	1	1	-3.90785	-3.19511	-2.36748	GO:1903311	M111	3	0	GO Biological Processes	19	regulation of mRNA metabolic process	19_GO:0050789 regulation of biological process	-6.95445	4.1369	6.98922	28133	335	406	20	4.92611	1.07404	1994|2521|3178|4670|4904|5683|5692|5700|5701|5710|5711|5716|5718|5936|6733|7314|8570|9491|9588|201626	ELAVL1|FUS|HNRNPA1|HNRNPM|YBX1|PSMA2|PSMB4|PSMC1|PSMC2|PSMD4|PSMD5|PSMD10|PSMD12|RBM4|SRPK2|UBB|KHSRP|PSMF1|PRDX6|PDE12	-5.03802	0	1	0	0	-21.1255	20.7879
1	1	0	-3.63874	-3.00788	0	GO:0044839	M110	2	0	GO Biological Processes	19	cell cycle G2/M phase transition	19_GO:0009987 cellular process	-6.88523	4.51912	7.1094	28133	276	406	18	4.4335	1.02156	1778|5577|5683|5692|5700|5701|5710|5711|5716|5718|8883|9491|10383|10763|11258|22919|203068|219771	DYNC1H1|PRKAR2B|PSMA2|PSMB4|PSMC1|PSMC2|PSMD4|PSMD5|PSMD10|PSMD12|NAE1|PSMF1|TUBB4B|NES|DCTN3|MAPRE1|TUBB|CCNY	-4.98552	0	1	0	0	-21.1255	20.7879
1	1	1	-4.18888	-2.68807	-2.21872	R-HSA-8878159	M111	3	0	Reactome Gene Sets	6	Transcriptional regulation by RUNX3		-6.88503	8.02341	8.29752	28133	95	406	11	2.70936	0.80576	5683|5692|5700|5701|5710|5711|5716|5718|6714|7314|9491	PSMA2|PSMB4|PSMC1|PSMC2|PSMD4|PSMD5|PSMD10|PSMD12|SRC|UBB|PSMF1	-4.98552	0	1	0	0	-21.1255	20.7879
1	1	1	-4.42457	-3.84148	-2.35446	R-HSA-446652	M111	3	0	Reactome Gene Sets	6	Interleukin-1 family signaling		-6.87486	6.43436	7.80009	28133	140	406	13	3.20197	0.873733	3146|5683|5692|5700|5701|5710|5711|5716|5718|6285|7314|9491|54472	HMGB1|PSMA2|PSMB4|PSMC1|PSMC2|PSMD4|PSMD5|PSMD10|PSMD12|S100B|UBB|PSMF1|TOLLIP	-4.97686	0	1	0	0	-21.1255	20.7879
1	1	0	-4.26117	-3.60481	0	GO:1902749	M110	2	0	GO Biological Processes	19	regulation of cell cycle G2/M phase transition	19_GO:0050789 regulation of biological process	-6.85299	5.06251	7.30327	28133	219	406	16	3.94089	0.965613	1778|5577|5683|5692|5700|5701|5710|5711|5716|5718|8883|9491|10383|11258|22919|203068	DYNC1H1|PRKAR2B|PSMA2|PSMB4|PSMC1|PSMC2|PSMD4|PSMD5|PSMD10|PSMD12|NAE1|PSMF1|TUBB4B|DCTN3|MAPRE1|TUBB	-4.95798	0	1	0	0	-21.1255	20.7879
1	1	0	-4.65632	-3.04702	0	R-HSA-176409	M110	2	0	Reactome Gene Sets	6	APC/C:Cdc20 mediated degradation of mitotic proteins		-6.84325	9.11751	8.57474	28133	76	406	10	2.46305	0.769234	5683|5692|5700|5701|5710|5711|5716|5718|7314|9491	PSMA2|PSMB4|PSMC1|PSMC2|PSMD4|PSMD5|PSMD10|PSMD12|UBB|PSMF1	-4.95269	0	1	0	0	-21.1255	20.7879
1	1	0	-5.20566	-4.44036	0	R-HSA-5689880	M110	2	0	Reactome Gene Sets	6	Ub-specific processing proteases		-6.82588	5.0395	7.27859	28133	220	406	16	3.94089	0.965613	408|5683|5692|5700|5701|5710|5711|5716|5718|7314|7874|8239|9491|9868|27430|55611	ARRB1|PSMA2|PSMB4|PSMC1|PSMC2|PSMD4|PSMD5|PSMD10|PSMD12|UBB|USP7|USP9X|PSMF1|TOMM70|MAT2B|OTUB1	-4.93827	0	1	0	0	-21.1255	20.7879
1	1	0	-5.92385	-4.12619	0	GO:0033238	M110	2	0	GO Biological Processes	19	regulation of cellular amine metabolic process	19_GO:0050789 regulation of biological process	-6.7884	8.9991	8.50522	28133	77	406	10	2.46305	0.769234	493|5683|5692|5700|5701|5710|5711|5716|5718|9491	ATP2B4|PSMA2|PSMB4|PSMC1|PSMC2|PSMD4|PSMD5|PSMD10|PSMD12|PSMF1	-4.9095	0	1	0	0	-21.1255	20.7879
1	1	0	-4.62868	-3.02574	0	R-HSA-176814	M110	2	0	Reactome Gene Sets	6	Activation of APC/C and APC/C:Cdc20 mediated degradation of mitotic proteins		-6.7884	8.9991	8.50522	28133	77	406	10	2.46305	0.769234	5683|5692|5700|5701|5710|5711|5716|5718|7314|9491	PSMA2|PSMB4|PSMC1|PSMC2|PSMD4|PSMD5|PSMD10|PSMD12|UBB|PSMF1	-4.9095	0	1	0	0	-21.1255	20.7879
1	1	0	-4.62868	-3.02574	0	R-HSA-5619084	M110	2	0	Reactome Gene Sets	6	ABC transporter disorders		-6.7884	8.9991	8.50522	28133	77	406	10	2.46305	0.769234	5683|5692|5700|5701|5710|5711|5716|5718|7314|9491	PSMA2|PSMB4|PSMC1|PSMC2|PSMD4|PSMD5|PSMD10|PSMD12|UBB|PSMF1	-4.9095	0	1	0	0	-21.1255	20.7879
1	1	0	-5.19742	-3.46503	0	R-HSA-351202	M110	2	0	Reactome Gene Sets	6	Metabolism of polyamines		-6.78219	10.5701	8.90438	28133	59	406	9	2.21675	0.73068	5683|5692|5700|5701|5710|5711|5716|5718|9491	PSMA2|PSMB4|PSMC1|PSMC2|PSMD4|PSMD5|PSMD10|PSMD12|PSMF1	-4.90616	0	1	0	0	-21.1255	20.7879
1	1	1	-4.15	-5.58952	-2.50501	R-HSA-1280215	M111	3	0	Reactome Gene Sets	6	Cytokine Signaling in Immune system		-6.75775	2.9403	6.3228	28133	707	406	30	7.38916	1.29827	829|960|1278|1974|2185|2317|3146|3839|4282|5300|5478|5683|5692|5700|5701|5710|5711|5716|5718|5898|6285|6616|6647|6804|7314|7525|9491|23321|54472|201626	CAPZA1|CD44|COL1A2|EIF4A2|PTK2B|FLNB|HMGB1|KPNA3|MIF|PIN1|PPIA|PSMA2|PSMB4|PSMC1|PSMC2|PSMD4|PSMD5|PSMD10|PSMD12|RALA|S100B|SNAP25|SOD1|STX1A|UBB|YES1|PSMF1|TRIM2|TOLLIP|PDE12	-4.88457	0	1	0	0	-21.1255	20.7879
1	1	0	-4.7826	-3.20948	0	R-HSA-8878166	M110	2	0	Reactome Gene Sets	6	Transcriptional regulation by RUNX2		-6.70476	6.87204	7.83289	28133	121	406	12	2.95567	0.840523	5683|5692|5700|5701|5710|5711|5716|5718|6714|7314|7525|9491	PSMA2|PSMB4|PSMC1|PSMC2|PSMD4|PSMD5|PSMD10|PSMD12|SRC|UBB|YES1|PSMF1	-4.83862	0	1	0	0	-21.1255	20.7879
1	1	0	-6.53781	-4.68234	0	GO:0002474	M110	2	0	GO Biological Processes	19	antigen processing and presentation of peptide antigen via MHC class I	19_GO:0002376 immune system process	-6.69943	7.69923	8.08001	28133	99	406	11	2.70936	0.80576	5683|5692|5700|5701|5710|5711|5716|5718|9491|10134|51752	PSMA2|PSMB4|PSMC1|PSMC2|PSMD4|PSMD5|PSMD10|PSMD12|PSMF1|BCAP31|ERAP1	-4.83746	0	1	0	0	-21.1255	20.7879
1	1	0	-6.63249	-4.70733	0	GO:0010498	M110	2	0	GO Biological Processes	19	proteasomal protein catabolic process	19_GO:0008152 metabolic process	-6.63249	6.10647	7.53199	28133	483	124	13	10.4839	2.75106	210|408|5094|5692|5710|5711|5718|6923|7874|8452|9491|10134|57095	ALAD|ARRB1|PCBP2|PSMB4|PSMD4|PSMD5|PSMD12|ELOB|USP7|CUL3|PSMF1|BCAP31|PITHD1	-4.47498	0	1	0	0	-21.1255	20.7879
1	1	0	-3.88511	-4.7787	0	GO:0044770	M110	2	0	GO Biological Processes	19	cell cycle phase transition	19_GO:0009987 cellular process	-6.59526	3.02684	6.28142	28133	641	406	28	6.89655	1.25758	493|586|637|1020|1778|5577|5591|5683|5692|5700|5701|5710|5711|5716|5718|5962|7332|8452|8883|9491|10383|10763|11258|11331|22919|23122|203068|219771	ATP2B4|BCAT1|BID|CDK5|DYNC1H1|PRKAR2B|PRKDC|PSMA2|PSMB4|PSMC1|PSMC2|PSMD4|PSMD5|PSMD10|PSMD12|RDX|UBE2L3|CUL3|NAE1|PSMF1|TUBB4B|NES|DCTN3|PHB2|MAPRE1|CLASP2|TUBB|CCNY	-4.74286	0	1	0	0	-21.1255	20.7879
1	1	0	-4.52192	-2.94357	0	R-HSA-176408	M110	2	0	Reactome Gene Sets	6	Regulation of APC/C activators between G1/S and early anaphase		-6.57707	8.5547	8.23929	28133	81	406	10	2.46305	0.769234	5683|5692|5700|5701|5710|5711|5716|5718|7314|9491	PSMA2|PSMB4|PSMC1|PSMC2|PSMD4|PSMD5|PSMD10|PSMD12|UBB|PSMF1	-4.72737	0	1	0	0	-21.1255	20.7879
1	1	1	-4.04193	-2.57578	-2.11109	R-HSA-5689603	M111	3	0	Reactome Gene Sets	6	UCH proteinases		-6.56597	7.47279	7.92472	28133	102	406	11	2.70936	0.80576	5683|5692|5700|5701|5710|5711|5716|5718|7314|7347|9491	PSMA2|PSMB4|PSMC1|PSMC2|PSMD4|PSMD5|PSMD10|PSMD12|UBB|UCHL3|PSMF1	-4.71761	0	1	0	0	-21.1255	20.7879
1	0	0	-4.04483	0	0	CORUM:32	M100	1	0	CORUM	33	PA700 complex		-6.5461	20.7879	10.7121	28133	20	406	6	1.47783	0.598848	5700|5701|5710|5711|5716|5718	PSMC1|PSMC2|PSMD4|PSMD5|PSMD10|PSMD12	-4.70041	0	1	0	0	-21.1255	20.7879
1	1	1	-4.11567	-2.69886	-2.06064	GO:0071453	M111	3	0	GO Biological Processes	19	cellular response to oxygen levels	19_GO:0050896 response to stimulus	-6.53753	4.79952	7.01664	28133	231	406	16	3.94089	0.965613	358|2023|5683|5692|5700|5701|5710|5711|5716|5718|6714|6923|7314|9491|10525|11331	AQP1|ENO1|PSMA2|PSMB4|PSMC1|PSMC2|PSMD4|PSMD5|PSMD10|PSMD12|SRC|ELOB|UBB|PSMF1|HYOU1|PHB2	-4.69582	0	1	0	0	-21.1255	20.7879
1	1	0	-4.49612	-2.92373	0	R-HSA-2871837	M110	2	0	Reactome Gene Sets	6	FCERI mediated NF-kB activation		-6.52615	8.45038	8.17566	28133	82	406	10	2.46305	0.769234	5683|5692|5700|5701|5710|5711|5716|5718|7314|9491	PSMA2|PSMB4|PSMC1|PSMC2|PSMD4|PSMD5|PSMD10|PSMD12|UBB|PSMF1	-4.68576	0	1	0	0	-21.1255	20.7879
1	1	0	-4.02184	-3.53056	0	GO:0070498	M110	2	0	GO Biological Processes	19	interleukin-1-mediated signaling pathway	19_GO:0023052 signaling	-6.52251	7.40023	7.87435	28133	103	406	11	2.70936	0.80576	5683|5692|5700|5701|5710|5711|5716|5718|7314|9491|54472	PSMA2|PSMB4|PSMC1|PSMC2|PSMD4|PSMD5|PSMD10|PSMD12|UBB|PSMF1|TOLLIP	-4.68344	0	1	0	0	-21.1255	20.7879
1	1	1	-4.40738	-4.20022	-3.06322	R-HSA-449147	M111	3	0	Reactome Gene Sets	6	Signaling by Interleukins		-6.50132	3.45714	6.43683	28133	461	406	23	5.66502	1.14729	829|1278|2185|3146|4282|5478|5683|5692|5700|5701|5710|5711|5716|5718|5898|6285|6616|6647|6804|7314|7525|9491|54472	CAPZA1|COL1A2|PTK2B|HMGB1|MIF|PPIA|PSMA2|PSMB4|PSMC1|PSMC2|PSMD4|PSMD5|PSMD10|PSMD12|RALA|S100B|SNAP25|SOD1|STX1A|UBB|YES1|PSMF1|TOLLIP	-4.66486	0	1	0	0	-21.1255	20.7879
1	1	0	-4.47066	-2.90417	0	R-HSA-1236974	M110	2	0	Reactome Gene Sets	6	ER-Phagosome pathway		-6.47596	8.34857	8.11311	28133	83	406	10	2.46305	0.769234	5683|5692|5700|5701|5710|5711|5716|5718|7314|9491	PSMA2|PSMB4|PSMC1|PSMC2|PSMD4|PSMD5|PSMD10|PSMD12|UBB|PSMF1	-4.64468	0	1	0	0	-21.1255	20.7879
1	1	0	-4.47066	-2.90417	0	R-HSA-69202	M110	2	0	Reactome Gene Sets	6	Cyclin E associated events during G1/S transition		-6.47596	8.34857	8.11311	28133	83	406	10	2.46305	0.769234	5683|5692|5700|5701|5710|5711|5716|5718|7314|9491	PSMA2|PSMB4|PSMC1|PSMC2|PSMD4|PSMD5|PSMD10|PSMD12|UBB|PSMF1	-4.64468	0	1	0	0	-21.1255	20.7879
1	1	0	-4.42944	-2.95123	0	GO:0070555	M110	2	0	GO Biological Processes	19	response to interleukin-1	19_GO:0050896 response to stimulus	-6.44367	5.04561	7.05209	28133	206	406	15	3.69458	0.936149	952|2244|5683|5692|5700|5701|5710|5711|5716|5718|6714|7314|9491|54472|140885	CD38|FGB|PSMA2|PSMB4|PSMC1|PSMC2|PSMD4|PSMD5|PSMD10|PSMD12|SRC|UBB|PSMF1|TOLLIP|SIRPA	-4.61496	0	1	0	0	-21.1255	20.7879
1	1	0	-4.42073	-2.86581	0	R-HSA-69002	M110	2	0	Reactome Gene Sets	6	DNA Replication Pre-Initiation		-6.37767	8.15213	7.99109	28133	85	406	10	2.46305	0.769234	5683|5692|5700|5701|5710|5711|5716|5718|7314|9491	PSMA2|PSMB4|PSMC1|PSMC2|PSMD4|PSMD5|PSMD10|PSMD12|UBB|PSMF1	-4.55659	0	1	0	0	-21.1255	20.7879
1	1	0	-4.42073	-2.86581	0	R-HSA-69656	M110	2	0	Reactome Gene Sets	6	Cyclin A:Cdk2-associated events at S phase entry		-6.37767	8.15213	7.99109	28133	85	406	10	2.46305	0.769234	5683|5692|5700|5701|5710|5711|5716|5718|7314|9491	PSMA2|PSMB4|PSMC1|PSMC2|PSMD4|PSMD5|PSMD10|PSMD12|UBB|PSMF1	-4.55659	0	1	0	0	-21.1255	20.7879
1	1	0	-4.60581	-4.01829	0	R-HSA-8939236	M110	2	0	Reactome Gene Sets	6	RUNX1 regulates transcription of genes involved in differentiation of HSCs		-6.36396	6.39629	7.46236	28133	130	406	12	2.95567	0.840523	3020|5683|5692|5700|5701|5710|5711|5716|5718|7314|8359|9491	H3-3A|PSMA2|PSMB4|PSMC1|PSMC2|PSMD4|PSMD5|PSMD10|PSMD12|UBB|H4C1|PSMF1	-4.54413	0	1	0	0	-21.1255	20.7879
1	1	0	-5.06523	-4.46795	0	GO:0060071	M110	2	0	GO Biological Processes	19	Wnt signaling pathway, planar cell polarity pathway	19_GO:0032502 developmental process	-6.31252	7.05763	7.63227	28133	108	406	11	2.70936	0.80576	1175|5683|5692|5700|5701|5710|5711|5716|5718|5879|9491	AP2S1|PSMA2|PSMB4|PSMC1|PSMC2|PSMD4|PSMD5|PSMD10|PSMD12|RAC1|PSMF1	-4.49519	0	1	0	0	-21.1255	20.7879
1	1	0	-5.0422	-2.47192	0	GO:0043618	M110	2	0	GO Biological Processes	19	regulation of transcription from RNA polymerase II promoter in response to stress	19_GO:0050896 response to stimulus	-6.27191	6.99288	7.5857	28133	109	406	11	2.70936	0.80576	5683|5692|5700|5701|5710|5711|5716|5718|6923|7314|9491	PSMA2|PSMB4|PSMC1|PSMC2|PSMD4|PSMD5|PSMD10|PSMD12|ELOB|UBB|PSMF1	-4.46201	0	1	0	0	-21.1255	20.7879
1	1	0	-4.34818	-2.81012	0	GO:0060218	M110	2	0	GO Biological Processes	19	hematopoietic stem cell differentiation	19_GO:0002376 immune system process	-6.23525	7.87422	7.81535	28133	88	406	10	2.46305	0.769234	5591|5683|5692|5700|5701|5710|5711|5716|5718|9491	PRKDC|PSMA2|PSMB4|PSMC1|PSMC2|PSMD4|PSMD5|PSMD10|PSMD12|PSMF1	-4.43023	0	1	0	0	-21.1255	20.7879
1	1	0	-4.34818	-2.81012	0	R-HSA-174143	M110	2	0	Reactome Gene Sets	6	APC/C-mediated degradation of cell cycle proteins		-6.23525	7.87422	7.81535	28133	88	406	10	2.46305	0.769234	5683|5692|5700|5701|5710|5711|5716|5718|7314|9491	PSMA2|PSMB4|PSMC1|PSMC2|PSMD4|PSMD5|PSMD10|PSMD12|UBB|PSMF1	-4.43023	0	1	0	0	-21.1255	20.7879
1	1	0	-4.34818	-2.81012	0	R-HSA-453276	M110	2	0	Reactome Gene Sets	6	Regulation of mitotic cell cycle		-6.23525	7.87422	7.81535	28133	88	406	10	2.46305	0.769234	5683|5692|5700|5701|5710|5711|5716|5718|7314|9491	PSMA2|PSMB4|PSMC1|PSMC2|PSMD4|PSMD5|PSMD10|PSMD12|UBB|PSMF1	-4.43023	0	1	0	0	-21.1255	20.7879
1	1	1	-4.53152	-3.94578	-2.43517	R-HSA-2454202	M111	3	0	Reactome Gene Sets	6	Fc epsilon receptor (FCERI) signaling		-6.2215	6.20535	7.30875	28133	134	406	12	2.95567	0.840523	805|5683|5692|5700|5701|5710|5711|5716|5718|5879|7314|9491	CALM2|PSMA2|PSMB4|PSMC1|PSMC2|PSMD4|PSMD5|PSMD10|PSMD12|RAC1|UBB|PSMF1	-4.41769	0	1	0	0	-21.1255	20.7879
1	1	0	-4.3246	-2.79203	0	GO:1901532	M110	2	0	GO Biological Processes	19	regulation of hematopoietic progenitor cell differentiation	19_GO:0002376 immune system process	-6.18905	7.78574	7.75862	28133	89	406	10	2.46305	0.769234	5591|5683|5692|5700|5701|5710|5711|5716|5718|9491	PRKDC|PSMA2|PSMB4|PSMC1|PSMC2|PSMD4|PSMD5|PSMD10|PSMD12|PSMF1	-4.39243	0	1	0	0	-21.1255	20.7879
1	1	0	-4.35431	-3.35736	0	R-HSA-8953854	M110	2	0	Reactome Gene Sets	6	Metabolism of RNA		-6.17345	2.88292	5.98276	28133	673	406	28	6.89655	1.25758	1974|1994|2521|3178|3187|3188|4670|4809|4904|5094|5683|5692|5700|5701|5710|5711|5716|5718|6133|6193|7314|8570|9343|9491|10992|23451|57819|80349	EIF4A2|ELAVL1|FUS|HNRNPA1|HNRNPH1|HNRNPH2|HNRNPM|SNU13|YBX1|PCBP2|PSMA2|PSMB4|PSMC1|PSMC2|PSMD4|PSMD5|PSMD10|PSMD12|RPL9|RPS5|UBB|KHSRP|EFTUD2|PSMF1|SF3B2|SF3B1|LSM2|WDR61	-4.37803	0	1	0	0	-21.1255	20.7879
1	1	0	-3.50396	-3.84259	0	GO:0044772	M110	2	0	GO Biological Processes	19	mitotic cell cycle phase transition	19_GO:0009987 cellular process	-6.16645	3.02793	6.05004	28133	595	406	26	6.40394	1.21504	586|637|1020|1778|5577|5591|5683|5692|5700|5701|5710|5711|5716|5718|5962|8452|8883|9491|10383|10763|11258|11331|22919|23122|203068|219771	BCAT1|BID|CDK5|DYNC1H1|PRKAR2B|PRKDC|PSMA2|PSMB4|PSMC1|PSMC2|PSMD4|PSMD5|PSMD10|PSMD12|RDX|CUL3|NAE1|PSMF1|TUBB4B|NES|DCTN3|PHB2|MAPRE1|CLASP2|TUBB|CCNY	-4.37339	0	1	0	0	-21.1255	20.7879
1	1	1	-3.34357	-4.17727	-2.57908	R-HSA-9006925	M111	3	0	Reactome Gene Sets	6	Intracellular signaling by second messengers		-6.16359	4.03649	6.49461	28133	309	406	18	4.4335	1.02156	805|5577|5582|5683|5692|5700|5701|5710|5711|5716|5718|5879|6714|7314|7874|8396|9491|26960	CALM2|PRKAR2B|PRKCG|PSMA2|PSMB4|PSMC1|PSMC2|PSMD4|PSMD5|PSMD10|PSMD12|RAC1|SRC|UBB|USP7|PIP4K2B|PSMF1|NBEA	-4.37171	0	1	0	0	-21.1255	20.7879
1	1	0	-4.97446	-4.37896	0	GO:0090175	M110	2	0	GO Biological Processes	19	regulation of establishment of planar polarity	19_GO:0032502 developmental process	-6.1527	6.80557	7.44945	28133	112	406	11	2.70936	0.80576	1175|5683|5692|5700|5701|5710|5711|5716|5718|5879|9491	AP2S1|PSMA2|PSMB4|PSMC1|PSMC2|PSMD4|PSMD5|PSMD10|PSMD12|RAC1|PSMF1	-4.36317	0	1	0	0	-21.1255	20.7879
1	0	1	-3.55219	0	-2.59278	GO:0006402	M101	2	0	GO Biological Processes	19	mRNA catabolic process	19_GO:0048519 negative regulation of biological process	-6.12192	3.6663	6.31534	28133	378	406	20	4.92611	1.07404	1994|2521|4670|4904|5683|5692|5700|5701|5710|5711|5716|5718|6133|6193|7314|8570|9491|57819|80349|201626	ELAVL1|FUS|HNRNPM|YBX1|PSMA2|PSMB4|PSMC1|PSMC2|PSMD4|PSMD5|PSMD10|PSMD12|RPL9|RPS5|UBB|KHSRP|PSMF1|LSM2|WDR61|PDE12	-4.33705	0	1	0	0	-21.1255	20.7879
1	1	0	-4.27828	-2.75652	0	R-HSA-69052	M110	2	0	Reactome Gene Sets	6	Switching of origins to a post-replicative state		-6.09845	7.61463	7.64775	28133	91	406	10	2.46305	0.769234	5683|5692|5700|5701|5710|5711|5716|5718|7314|9491	PSMA2|PSMB4|PSMC1|PSMC2|PSMD4|PSMD5|PSMD10|PSMD12|UBB|PSMF1	-4.31704	0	1	0	0	-21.1255	20.7879
1	1	0	-4.90869	-2.38879	0	GO:0043620	M110	2	0	GO Biological Processes	19	regulation of DNA-templated transcription in response to stress	19_GO:0050896 response to stimulus	-6.03726	6.62804	7.31811	28133	115	406	11	2.70936	0.80576	5683|5692|5700|5701|5710|5711|5716|5718|6923|7314|9491	PSMA2|PSMB4|PSMC1|PSMC2|PSMD4|PSMD5|PSMD10|PSMD12|ELOB|UBB|PSMF1	-4.26269	0	1	0	0	-21.1255	20.7879
1	1	0	-3.5359	-4.42454	0	GO:0060828	M110	2	0	GO Biological Processes	19	regulation of canonical Wnt signaling pathway	19_GO:0023052 signaling	-5.95364	4.10447	6.39674	28133	287	406	17	4.18719	0.994055	348|1000|3728|5300|5683|5692|5700|5701|5710|5711|5716|5718|6714|8452|9491|219287|219771	APOE|CDH2|JUP|PIN1|PSMA2|PSMB4|PSMC1|PSMC2|PSMD4|PSMD5|PSMD10|PSMD12|SRC|CUL3|PSMF1|AMER2|CCNY	-4.18691	0	1	0	0	-21.1255	20.7879
1	1	1	-4.39005	-2.8974	-2.32849	R-HSA-5621481	M111	3	0	Reactome Gene Sets	6	C-type lectin receptors (CLRs)		-5.95145	5.85576	7.01946	28133	142	406	12	2.95567	0.840523	805|5683|5692|5700|5701|5710|5711|5716|5718|6714|7314|9491	CALM2|PSMA2|PSMB4|PSMC1|PSMC2|PSMD4|PSMD5|PSMD10|PSMD12|SRC|UBB|PSMF1	-4.18583	0	1	0	0	-21.1255	20.7879
1	1	1	-2.58863	-2.47941	-2.56142	GO:0031349	M111	3	0	GO Biological Processes	19	positive regulation of defense response	19_GO:0048518 positive regulation of biological process	-5.9479	3.1143	5.969	28133	534	406	24	5.91133	1.17044	1652|2244|3146|5138|5591|5683|5692|5700|5701|5710|5711|5716|5718|6271|6714|7314|8546|9491|9782|9868|10211|11331|23705|57506	DDT|FGB|HMGB1|PDE2A|PRKDC|PSMA2|PSMB4|PSMC1|PSMC2|PSMD4|PSMD5|PSMD10|PSMD12|S100A1|SRC|UBB|AP3B1|PSMF1|MATR3|TOMM70|FLOT1|PHB2|CADM1|MAVS	-4.18338	0	1	0	0	-21.1255	20.7879
1	0	0	-4.94969	0	0	R-HSA-9010553	M100	1	0	Reactome Gene Sets	6	Regulation of expression of SLITs and ROBOs		-5.87396	5.2679	6.77391	28133	171	406	13	3.20197	0.873733	5683|5692|5700|5701|5710|5711|5716|5718|6133|6193|6923|7314|9491	PSMA2|PSMB4|PSMC1|PSMC2|PSMD4|PSMD5|PSMD10|PSMD12|RPL9|RPS5|ELOB|UBB|PSMF1	-4.11494	0	1	0	0	-21.1255	20.7879
1	1	0	-4.68435	-3.06862	0	GO:0002479	M110	2	0	GO Biological Processes	19	antigen processing and presentation of exogenous peptide antigen via MHC class I, TAP-dependent	19_GO:0002376 immune system process	-5.8707	8.31517	7.67607	28133	75	406	9	2.21675	0.73068	5683|5692|5700|5701|5710|5711|5716|5718|9491	PSMA2|PSMB4|PSMC1|PSMC2|PSMD4|PSMD5|PSMD10|PSMD12|PSMF1	-4.11277	0	1	0	0	-21.1255	20.7879
1	1	0	-3.70985	-2.32325	0	R-HSA-202403	M110	2	0	Reactome Gene Sets	6	TCR signaling		-5.85267	6.35187	7.10932	28133	120	406	11	2.70936	0.80576	5683|5692|5700|5701|5710|5711|5716|5718|7314|9491|55740	PSMA2|PSMB4|PSMC1|PSMC2|PSMD4|PSMD5|PSMD10|PSMD12|UBB|PSMF1|ENAH	-4.09691	0	1	0	0	-21.1255	20.7879
1	1	0	-4.32259	-3.74215	0	GO:0001738	M110	2	0	GO Biological Processes	19	morphogenesis of a polarized epithelium	19_GO:0032502 developmental process	-5.82328	5.69532	6.88297	28133	146	406	12	2.95567	0.840523	1175|5683|5692|5700|5701|5710|5711|5716|5718|5879|7430|9491	AP2S1|PSMA2|PSMB4|PSMC1|PSMC2|PSMD4|PSMD5|PSMD10|PSMD12|RAC1|EZR|PSMF1	-4.06968	0	1	0	0	-21.1255	20.7879
1	1	0	-5.8159	-5.03309	0	GO:1905330	M110	2	0	GO Biological Processes	19	regulation of morphogenesis of an epithelium	19_GO:0032502 developmental process	-5.8159	9.9727	8.08021	28133	182	124	8	6.45161	2.20618	1175|5692|5710|5711|5718|9491|11331|23122	AP2S1|PSMB4|PSMD4|PSMD5|PSMD12|PSMF1|PHB2|CLASP2	-3.84081	0	1	0	0	-21.1255	20.7879
1	1	0	-4.1245	-2.63884	0	R-HSA-1236975	M110	2	0	Reactome Gene Sets	6	Antigen processing-Cross presentation		-5.79904	7.07072	7.28476	28133	98	406	10	2.46305	0.769234	5683|5692|5700|5701|5710|5711|5716|5718|7314|9491	PSMA2|PSMB4|PSMC1|PSMC2|PSMD4|PSMD5|PSMD10|PSMD12|UBB|PSMF1	-4.05292	0	1	0	0	-21.1255	20.7879
1	1	0	-4.1245	-2.63884	0	R-HSA-202424	M110	2	0	Reactome Gene Sets	6	Downstream TCR signaling		-5.79904	7.07072	7.28476	28133	98	406	10	2.46305	0.769234	5683|5692|5700|5701|5710|5711|5716|5718|7314|9491	PSMA2|PSMB4|PSMC1|PSMC2|PSMD4|PSMD5|PSMD10|PSMD12|UBB|PSMF1	-4.05292	0	1	0	0	-21.1255	20.7879
1	1	0	-4.30604	-3.72604	0	GO:0090263	M110	2	0	GO Biological Processes	19	positive regulation of canonical Wnt signaling pathway	19_GO:0048518 positive regulation of biological process	-5.79191	5.65658	6.84963	28133	147	406	12	2.95567	0.840523	3728|5300|5683|5692|5700|5701|5710|5711|5716|5718|6714|9491	JUP|PIN1|PSMA2|PSMB4|PSMC1|PSMC2|PSMD4|PSMD5|PSMD10|PSMD12|SRC|PSMF1	-4.04684	0	1	0	0	-21.1255	20.7879
1	1	1	-4.4106	-2.35393	-2.29224	GO:0002757	M111	3	0	GO Biological Processes	19	immune response-activating signal transduction	19_GO:0002376 immune system process	-5.78454	2.81764	5.73565	28133	664	406	27	6.65025	1.23655	952|2244|3146|5683|5692|5700|5701|5710|5711|5716|5718|5879|6271|6714|7070|7314|7430|7525|8546|9491|10095|10096|10211|10384|10787|11331|29085	CD38|FGB|HMGB1|PSMA2|PSMB4|PSMC1|PSMC2|PSMD4|PSMD5|PSMD10|PSMD12|RAC1|S100A1|SRC|THY1|UBB|EZR|YES1|AP3B1|PSMF1|ARPC1B|ACTR3|FLOT1|BTN3A3|NCKAP1|PHB2|PHPT1	-4.04264	0	1	0	0	-21.1255	20.7879
1	1	0	-4.88445	-2.50178	0	GO:0033209	M110	2	0	GO Biological Processes	19	tumor necrosis factor-mediated signaling pathway	19_GO:0023052 signaling	-5.76119	5.14749	6.65983	28133	175	406	13	3.20197	0.873733	2185|2950|5683|5692|5700|5701|5710|5711|5716|5718|8904|9491|84817	PTK2B|GSTP1|PSMA2|PSMB4|PSMC1|PSMC2|PSMD4|PSMD5|PSMD10|PSMD12|CPNE1|PSMF1|TXNDC17	-4.02033	0	1	0	0	-21.1255	20.7879
1	1	0	-4.74209	-4.15147	0	GO:0001736	M110	2	0	GO Biological Processes	19	establishment of planar polarity	19_GO:0032502 developmental process	-5.74631	6.19694	6.98966	28133	123	406	11	2.70936	0.80576	1175|5683|5692|5700|5701|5710|5711|5716|5718|5879|9491	AP2S1|PSMA2|PSMB4|PSMC1|PSMC2|PSMD4|PSMD5|PSMD10|PSMD12|RAC1|PSMF1	-4.00962	0	1	0	0	-21.1255	20.7879
1	1	0	-4.74209	-4.15147	0	GO:0007164	M110	2	0	GO Biological Processes	19	establishment of tissue polarity	19_GO:0032502 developmental process	-5.74631	6.19694	6.98966	28133	123	406	11	2.70936	0.80576	1175|5683|5692|5700|5701|5710|5711|5716|5718|5879|9491	AP2S1|PSMA2|PSMB4|PSMC1|PSMC2|PSMD4|PSMD5|PSMD10|PSMD12|RAC1|PSMF1	-4.00962	0	1	0	0	-21.1255	20.7879
1	1	0	-5.01018	-2.67081	0	R-HSA-8951664	M110	2	0	Reactome Gene Sets	6	Neddylation		-5.74439	4.44187	6.39763	28133	234	406	15	3.69458	0.936149	2873|5683|5692|5700|5701|5710|5711|5716|5718|6923|7314|7347|8452|8883|9491	GPS1|PSMA2|PSMB4|PSMC1|PSMC2|PSMD4|PSMD5|PSMD10|PSMD12|ELOB|UBB|UCHL3|CUL3|NAE1|PSMF1	-4.00873	0	1	0	0	-21.1255	20.7879
1	1	0	-2.9135	-4.34988	0	GO:0030111	M110	2	0	GO Biological Processes	19	regulation of Wnt signaling pathway	19_GO:0023052 signaling	-5.72359	3.59718	6.05188	28133	366	406	19	4.6798	1.0482	348|1000|3728|4035|5300|5683|5692|5700|5701|5710|5711|5716|5718|6714|8452|9491|23499|219287|219771	APOE|CDH2|JUP|LRP1|PIN1|PSMA2|PSMB4|PSMC1|PSMC2|PSMD4|PSMD5|PSMD10|PSMD12|SRC|CUL3|PSMF1|MACF1|AMER2|CCNY	-3.99205	0	1	0	0	-21.1255	20.7879
1	1	0	-5.25832	-2.60695	0	GO:0010972	M110	2	0	GO Biological Processes	19	negative regulation of G2/M transition of mitotic cell cycle	19_GO:0048519 negative regulation of biological process	-5.71814	6.92931	7.18756	28133	100	406	10	2.46305	0.769234	5683|5692|5700|5701|5710|5711|5716|5718|8883|9491	PSMA2|PSMB4|PSMC1|PSMC2|PSMD4|PSMD5|PSMD10|PSMD12|NAE1|PSMF1	-3.98762	0	1	0	0	-21.1255	20.7879
1	1	0	-3.83129	-3.70219	0	GO:1901990	M110	2	0	GO Biological Processes	19	regulation of mitotic cell cycle phase transition	19_GO:0050789 regulation of biological process	-5.69685	3.3147	5.91489	28133	439	406	21	5.17241	1.09913	637|1778|5577|5591|5683|5692|5700|5701|5710|5711|5716|5718|5962|8452|8883|9491|10383|11258|11331|22919|203068	BID|DYNC1H1|PRKAR2B|PRKDC|PSMA2|PSMB4|PSMC1|PSMC2|PSMD4|PSMD5|PSMD10|PSMD12|RDX|CUL3|NAE1|PSMF1|TUBB4B|DCTN3|PHB2|MAPRE1|TUBB	-3.9704	0	1	0	0	-21.1255	20.7879
1	1	0	-4.2758	-4.0607	0	GO:1901987	M110	2	0	GO Biological Processes	19	regulation of cell cycle phase transition	19_GO:0050789 regulation of biological process	-5.6666	3.18922	5.84156	28133	478	406	22	5.41872	1.12354	493|637|1778|5577|5591|5683|5692|5700|5701|5710|5711|5716|5718|5962|8452|8883|9491|10383|11258|11331|22919|203068	ATP2B4|BID|DYNC1H1|PRKAR2B|PRKDC|PSMA2|PSMB4|PSMC1|PSMC2|PSMD4|PSMD5|PSMD10|PSMD12|RDX|CUL3|NAE1|PSMF1|TUBB4B|DCTN3|PHB2|MAPRE1|TUBB	-3.94318	0	1	0	0	-21.1255	20.7879
1	1	0	-3.8344	-3.2685	0	GO:0030177	M110	2	0	GO Biological Processes	19	positive regulation of Wnt signaling pathway	19_GO:0048518 positive regulation of biological process	-5.65158	5.03246	6.54917	28133	179	406	13	3.20197	0.873733	3728|5300|5683|5692|5700|5701|5710|5711|5716|5718|6714|9491|23499	JUP|PIN1|PSMA2|PSMB4|PSMC1|PSMC2|PSMD4|PSMD5|PSMD10|PSMD12|SRC|PSMF1|MACF1	-3.93017	0	1	0	0	-21.1255	20.7879
1	1	0	-3.8344	-4.14646	0	GO:0090090	M110	2	0	GO Biological Processes	19	negative regulation of canonical Wnt signaling pathway	19_GO:0048519 negative regulation of biological process	-5.65158	5.03246	6.54917	28133	179	406	13	3.20197	0.873733	348|1000|5683|5692|5700|5701|5710|5711|5716|5718|8452|9491|219287	APOE|CDH2|PSMA2|PSMB4|PSMC1|PSMC2|PSMD4|PSMD5|PSMD10|PSMD12|CUL3|PSMF1|AMER2	-3.93017	0	1	0	0	-21.1255	20.7879
1	1	0	-4.04193	-2.57578	0	R-HSA-5668541	M110	2	0	Reactome Gene Sets	6	TNFR2 non-canonical NF-kB pathway		-5.63915	6.79344	7.09299	28133	102	406	10	2.46305	0.769234	5683|5692|5700|5701|5710|5711|5716|5718|7314|9491	PSMA2|PSMB4|PSMC1|PSMC2|PSMD4|PSMD5|PSMD10|PSMD12|UBB|PSMF1	-3.91873	0	1	0	0	-21.1255	20.7879
1	1	0	-4.54807	-2.96368	0	GO:0042590	M110	2	0	GO Biological Processes	19	antigen processing and presentation of exogenous peptide antigen via MHC class I	19_GO:0002376 immune system process	-5.63194	7.79547	7.36524	28133	80	406	9	2.21675	0.73068	5683|5692|5700|5701|5710|5711|5716|5718|9491	PSMA2|PSMB4|PSMC1|PSMC2|PSMD4|PSMD5|PSMD10|PSMD12|PSMF1	-3.91786	0	1	0	0	-21.1255	20.7879
1	1	0	-4.94355	-4.18699	0	GO:0038093	M110	2	0	GO Biological Processes	19	Fc receptor signaling pathway	19_GO:0002376 immune system process	-5.63072	4.34894	6.29162	28133	239	406	15	3.69458	0.936149	5683|5692|5700|5701|5710|5711|5716|5718|5879|6714|7525|9491|10095|10096|10787	PSMA2|PSMB4|PSMC1|PSMC2|PSMD4|PSMD5|PSMD10|PSMD12|RAC1|SRC|YES1|PSMF1|ARPC1B|ACTR3|NCKAP1	-3.91786	0	1	0	0	-21.1255	20.7879
1	1	0	-4.0234	-4.18699	0	R-HSA-8878171	M110	2	0	Reactome Gene Sets	6	Transcriptional regulation by RUNX1		-5.63072	4.34894	6.29162	28133	239	406	15	3.69458	0.936149	3020|5683|5692|5700|5701|5710|5711|5716|5718|6601|6714|7082|7314|8359|9491	H3-3A|PSMA2|PSMB4|PSMC1|PSMC2|PSMD4|PSMD5|PSMD10|PSMD12|SMARCC2|SRC|TJP1|UBB|H4C1|PSMF1	-3.91786	0	1	0	0	-21.1255	20.7879
1	1	0	-3.82123	-3.25577	0	GO:0071347	M110	2	0	GO Biological Processes	19	cellular response to interleukin-1	19_GO:0050896 response to stimulus	-5.62466	5.0045	6.52202	28133	180	406	13	3.20197	0.873733	2244|5683|5692|5700|5701|5710|5711|5716|5718|7314|9491|54472|140885	FGB|PSMA2|PSMB4|PSMC1|PSMC2|PSMD4|PSMD5|PSMD10|PSMD12|UBB|PSMF1|TOLLIP|SIRPA	-3.91313	0	1	0	0	-21.1255	20.7879
1	1	0	-5.2659	-4.57973	0	GO:0035567	M110	2	0	GO Biological Processes	19	non-canonical Wnt signaling pathway	19_GO:0023052 signaling	-5.60902	5.43475	6.65584	28133	153	406	12	2.95567	0.840523	1175|2775|5683|5692|5700|5701|5710|5711|5716|5718|5879|9491	AP2S1|GNAO1|PSMA2|PSMB4|PSMC1|PSMC2|PSMD4|PSMD5|PSMD10|PSMD12|RAC1|PSMF1	-3.90042	0	1	0	0	-21.1255	20.7879
1	1	0	-4.02184	-2.56045	0	R-HSA-382556	M110	2	0	Reactome Gene Sets	6	ABC-family proteins mediated transport		-5.60035	6.72749	7.04665	28133	103	406	10	2.46305	0.769234	5683|5692|5700|5701|5710|5711|5716|5718|7314|9491	PSMA2|PSMB4|PSMC1|PSMC2|PSMD4|PSMD5|PSMD10|PSMD12|UBB|PSMF1	-3.89272	0	1	0	0	-21.1255	20.7879
1	1	1	-3.05916	-3.46071	-2.40021	R-HSA-69278	M111	3	0	Reactome Gene Sets	6	Cell Cycle, Mitotic		-5.57708	2.96441	5.68711	28133	561	406	24	5.91133	1.17044	1778|1780|3020|5577|5683|5692|5700|5701|5710|5711|5716|5718|6714|7314|8359|9491|10383|11258|22919|23122|26003|84617|84790|203068	DYNC1H1|DYNC1I1|H3-3A|PRKAR2B|PSMA2|PSMB4|PSMC1|PSMC2|PSMD4|PSMD5|PSMD10|PSMD12|SRC|UBB|H4C1|PSMF1|TUBB4B|DCTN3|MAPRE1|CLASP2|GORASP2|TUBB6|TUBA1C|TUBB	-3.87427	0	1	0	0	-21.1255	20.7879
1	1	0	-4.62478	-3.08376	0	GO:0044106	M110	2	0	GO Biological Processes	19	cellular amine metabolic process	19_GO:0008152 metabolic process	-5.54271	5.90871	6.76183	28133	129	406	11	2.70936	0.80576	493|5683|5692|5700|5701|5710|5711|5716|5718|9491|23498	ATP2B4|PSMA2|PSMB4|PSMC1|PSMC2|PSMD4|PSMD5|PSMD10|PSMD12|PSMF1|HAAO	-3.84562	0	1	0	0	-21.1255	20.7879
1	1	0	-3.42801	-4.54022	0	GO:0030178	M110	2	0	GO Biological Processes	19	negative regulation of Wnt signaling pathway	19_GO:0048519 negative regulation of biological process	-5.52761	4.55448	6.30115	28133	213	406	14	3.44828	0.905562	348|1000|4035|5683|5692|5700|5701|5710|5711|5716|5718|8452|9491|219287	APOE|CDH2|LRP1|PSMA2|PSMB4|PSMC1|PSMC2|PSMD4|PSMD5|PSMD10|PSMD12|CUL3|PSMF1|AMER2	-3.83241	0	1	0	0	-21.1255	20.7879
1	1	0	-5.51112	-3.80722	0	GO:0043161	M110	2	0	GO Biological Processes	19	proteasome-mediated ubiquitin-dependent protein catabolic process	19_GO:0008152 metabolic process	-5.51112	5.85838	6.72301	28133	426	124	11	8.87097	2.55331	408|5094|5692|5710|5711|5718|6923|7874|8452|9491|10134	ARRB1|PCBP2|PSMB4|PSMD4|PSMD5|PSMD12|ELOB|USP7|CUL3|PSMF1|BCAP31	-3.6176	0	1	0	0	-21.1255	20.7879
1	0	1	-3.26969	0	-2.31429	GO:0006401	M101	2	0	GO Biological Processes	19	RNA catabolic process	19_GO:0008152 metabolic process	-5.47046	3.32341	5.78416	28133	417	406	20	4.92611	1.07404	1994|2521|4670|4904|5683|5692|5700|5701|5710|5711|5716|5718|6133|6193|7314|8570|9491|57819|80349|201626	ELAVL1|FUS|HNRNPM|YBX1|PSMA2|PSMB4|PSMC1|PSMC2|PSMD4|PSMD5|PSMD10|PSMD12|RPL9|RPS5|UBB|KHSRP|PSMF1|LSM2|WDR61|PDE12	-3.78365	0	1	0	0	-21.1255	20.7879
1	1	0	-4.33186	-3.9235	0	ko03050	M110	2	0	KEGG Pathway	24	Proteasome		-5.4557	10.7789	7.94418	28133	45	406	7	1.72414	0.646021	5683|5692|5700|5701|5710|5718|9491	PSMA2|PSMB4|PSMC1|PSMC2|PSMD4|PSMD12|PSMF1	-3.77257	0	1	0	0	-21.1255	20.7879
1	1	0	-4.10195	-2.05518	0	GO:0002758	M110	2	0	GO Biological Processes	19	innate immune response-activating signal transduction	19_GO:0002376 immune system process	-5.42494	3.75154	5.9331	28133	314	406	17	4.18719	0.994055	2244|3146|5683|5692|5700|5701|5710|5711|5716|5718|6271|6714|7314|8546|9491|10211|11331	FGB|HMGB1|PSMA2|PSMB4|PSMC1|PSMC2|PSMD4|PSMD5|PSMD10|PSMD12|S100A1|SRC|UBB|AP3B1|PSMF1|FLOT1|PHB2	-3.74365	0	1	0	0	-21.1255	20.7879
1	1	0	-4.62993	-4.12264	0	GO:0051603	M110	2	0	GO Biological Processes	19	proteolysis involved in cellular protein catabolic process	19_GO:0008152 metabolic process	-5.41332	2.63257	5.43469	28133	737	406	28	6.89655	1.25758	210|348|408|2185|5094|5582|5683|5692|5700|5701|5710|5711|5716|5718|5886|6923|7314|7332|7347|7874|8239|8452|9491|10134|23321|29978|54472|57095	ALAD|APOE|ARRB1|PTK2B|PCBP2|PRKCG|PSMA2|PSMB4|PSMC1|PSMC2|PSMD4|PSMD5|PSMD10|PSMD12|RAD23A|ELOB|UBB|UBE2L3|UCHL3|USP7|USP9X|CUL3|PSMF1|BCAP31|TRIM2|UBQLN2|TOLLIP|PITHD1	-3.73612	0	1	0	0	-21.1255	20.7879
1	1	0	-4.66859	-3.14478	0	GO:0038061	M110	2	0	GO Biological Processes	19	NIK/NF-kappaB signaling	19_GO:0023052 signaling	-5.39047	4.76619	6.28639	28133	189	406	13	3.20197	0.873733	3146|5683|5692|5700|5701|5710|5711|5716|5718|7430|8904|9491|11331	HMGB1|PSMA2|PSMB4|PSMC1|PSMC2|PSMD4|PSMD5|PSMD10|PSMD12|EZR|CPNE1|PSMF1|PHB2	-3.71551	0	1	0	0	-21.1255	20.7879
1	1	1	-4.20284	-2.20543	-2.12656	GO:0002764	M111	3	0	GO Biological Processes	19	immune response-regulating signaling pathway	19_GO:0002376 immune system process	-5.38208	2.68039	5.43999	28133	698	406	27	6.65025	1.23655	952|2244|3146|5683|5692|5700|5701|5710|5711|5716|5718|5879|6271|6714|7070|7314|7430|7525|8546|9491|10095|10096|10211|10384|10787|11331|29085	CD38|FGB|HMGB1|PSMA2|PSMB4|PSMC1|PSMC2|PSMD4|PSMD5|PSMD10|PSMD12|RAC1|S100A1|SRC|THY1|UBB|EZR|YES1|AP3B1|PSMF1|ARPC1B|ACTR3|FLOT1|BTN3A3|NCKAP1|PHB2|PHPT1	-3.70892	0	1	0	0	-21.1255	20.7879
1	1	0	-4.25668	-3.84915	0	hsa03050	M110	2	0	KEGG Pathway	24	Proteasome		-5.32474	10.3202	7.73826	28133	47	406	7	1.72414	0.646021	5683|5692|5700|5701|5710|5718|9491	PSMA2|PSMB4|PSMC1|PSMC2|PSMD4|PSMD12|PSMF1	-3.66307	0	1	0	0	-21.1255	20.7879
1	1	0	-4.99682	-2.44364	0	GO:1902750	M110	2	0	GO Biological Processes	19	negative regulation of cell cycle G2/M phase transition	19_GO:0048519 negative regulation of biological process	-5.30533	6.24262	6.69688	28133	111	406	10	2.46305	0.769234	5683|5692|5700|5701|5710|5711|5716|5718|8883|9491	PSMA2|PSMB4|PSMC1|PSMC2|PSMD4|PSMD5|PSMD10|PSMD12|NAE1|PSMF1	-3.64453	0	1	0	0	-21.1255	20.7879
1	1	0	-4.4774	-2.96666	0	GO:0009308	M110	2	0	GO Biological Processes	19	amine metabolic process	19_GO:0008152 metabolic process	-5.2885	5.56368	6.47947	28133	137	406	11	2.70936	0.80576	493|5683|5692|5700|5701|5710|5711|5716|5718|9491|23498	ATP2B4|PSMA2|PSMB4|PSMC1|PSMC2|PSMD4|PSMD5|PSMD10|PSMD12|PSMF1|HAAO	-3.63116	0	1	0	0	-21.1255	20.7879
1	1	0	-3.81406	-2.4023	0	GO:0002223	M110	2	0	GO Biological Processes	19	stimulatory C-type lectin receptor signaling pathway	19_GO:0002376 immune system process	-5.20124	6.07834	6.57446	28133	114	406	10	2.46305	0.769234	5683|5692|5700|5701|5710|5711|5716|5718|6714|9491	PSMA2|PSMB4|PSMC1|PSMC2|PSMD4|PSMD5|PSMD10|PSMD12|SRC|PSMF1	-3.54905	0	1	0	0	-21.1255	20.7879
1	1	0	-4.42457	-2.92476	0	R-HSA-6807070	M110	2	0	Reactome Gene Sets	6	PTEN Regulation		-5.19781	5.44446	6.37926	28133	140	406	11	2.70936	0.80576	5683|5692|5700|5701|5710|5711|5716|5718|7314|7874|9491	PSMA2|PSMB4|PSMC1|PSMC2|PSMD4|PSMD5|PSMD10|PSMD12|UBB|USP7|PSMF1	-3.54779	0	1	0	0	-21.1255	20.7879
1	1	0	-3.98503	-2.57792	0	R-HSA-69481	M110	2	0	Reactome Gene Sets	6	G2/M Checkpoints		-5.18812	4.94951	6.21301	28133	168	406	12	2.95567	0.840523	5683|5692|5700|5701|5710|5711|5716|5718|7314|8359|9491|10111	PSMA2|PSMB4|PSMC1|PSMC2|PSMD4|PSMD5|PSMD10|PSMD12|UBB|H4C1|PSMF1|RAD50	-3.53933	0	1	0	0	-21.1255	20.7879
1	1	1	-3.47286	-2.85001	-2.12506	R-HSA-69620	M111	3	0	Reactome Gene Sets	6	Cell Cycle Checkpoints		-5.16898	3.77105	5.77968	28133	294	406	16	3.94089	0.965613	1778|1780|5683|5692|5700|5701|5710|5711|5716|5718|7314|8359|9491|10111|22919|23122	DYNC1H1|DYNC1I1|PSMA2|PSMB4|PSMC1|PSMC2|PSMD4|PSMD5|PSMD10|PSMD12|UBB|H4C1|PSMF1|RAD50|MAPRE1|CLASP2	-3.52103	0	1	0	0	-21.1255	20.7879
1	1	0	-3.76121	-2.36219	0	GO:2000736	M110	2	0	GO Biological Processes	19	regulation of stem cell differentiation	19_GO:0032502 developmental process	-5.10041	5.92249	6.45634	28133	117	406	10	2.46305	0.769234	5591|5683|5692|5700|5701|5710|5711|5716|5718|9491	PRKDC|PSMA2|PSMB4|PSMC1|PSMC2|PSMD4|PSMD5|PSMD10|PSMD12|PSMF1	-3.45834	0	1	0	0	-21.1255	20.7879
1	1	0	-3.15162	-3.93064	0	GO:0060070	M110	2	0	GO Biological Processes	19	canonical Wnt signaling pathway	19_GO:0023052 signaling	-5.08802	3.53749	5.63657	28133	333	406	17	4.18719	0.994055	348|1000|3728|5300|5683|5692|5700|5701|5710|5711|5716|5718|6714|8452|9491|219287|219771	APOE|CDH2|JUP|PIN1|PSMA2|PSMB4|PSMC1|PSMC2|PSMD4|PSMD5|PSMD10|PSMD12|SRC|CUL3|PSMF1|AMER2|CCNY	-3.44845	0	1	0	0	-21.1255	20.7879
1	1	0	-4.23306	-2.72188	0	GO:0031146	M110	2	0	GO Biological Processes	19	SCF-dependent proteasomal ubiquitin-dependent protein catabolic process	19_GO:0008152 metabolic process	-5.08572	6.70578	6.66929	28133	93	406	9	2.21675	0.73068	5683|5692|5700|5701|5710|5711|5716|5718|9491	PSMA2|PSMB4|PSMC1|PSMC2|PSMD4|PSMD5|PSMD10|PSMD12|PSMF1	-3.44697	0	1	0	0	-21.1255	20.7879
1	1	0	-5.0237	-3.44218	0	R-HSA-201681	M110	2	0	Reactome Gene Sets	6	TCF dependent signaling in response to WNT		-5.07822	4.16353	5.8676	28133	233	406	14	3.44828	0.905562	1487|3020|5683|5692|5700|5701|5710|5711|5716|5718|7314|8359|8452|9491	CTBP1|H3-3A|PSMA2|PSMB4|PSMC1|PSMC2|PSMD4|PSMD5|PSMD10|PSMD12|UBB|H4C1|CUL3|PSMF1	-3.44441	0	1	0	0	-21.1255	20.7879
1	1	0	-3.74393	-2.34908	0	GO:0002220	M110	2	0	GO Biological Processes	19	innate immune response activating cell surface receptor signaling pathway	19_GO:0002376 immune system process	-5.06749	5.8723	6.41788	28133	118	406	10	2.46305	0.769234	5683|5692|5700|5701|5710|5711|5716|5718|6714|9491	PSMA2|PSMB4|PSMC1|PSMC2|PSMD4|PSMD5|PSMD10|PSMD12|SRC|PSMF1	-3.43531	0	1	0	0	-21.1255	20.7879
1	1	0	-3.41157	-2.79183	0	GO:0070646	M110	2	0	GO Biological Processes	19	protein modification by small protein removal	19_GO:0008152 metabolic process	-5.04088	3.68335	5.66371	28133	301	406	16	3.94089	0.965613	2873|5683|5692|5700|5701|5710|5711|5716|5718|5886|7314|7347|7874|8239|9491|55611	GPS1|PSMA2|PSMB4|PSMC1|PSMC2|PSMD4|PSMD5|PSMD10|PSMD12|RAD23A|UBB|UCHL3|USP7|USP9X|PSMF1|OTUB1	-3.40952	0	1	0	0	-21.1255	20.7879
1	0	1	-2.66967	0	-2.31569	GO:0050852	M101	2	0	GO Biological Processes	19	T cell receptor signaling pathway	19_GO:0002376 immune system process	-5.02989	4.41574	5.92494	28133	204	406	13	3.20197	0.873733	5683|5692|5700|5701|5710|5711|5716|5718|7070|7430|9491|10384|29085	PSMA2|PSMB4|PSMC1|PSMC2|PSMD4|PSMD5|PSMD10|PSMD12|THY1|EZR|PSMF1|BTN3A3|PHPT1	-3.39933	0	1	0	0	-21.1255	20.7879
1	1	0	-3.70985	-2.32325	0	R-HSA-69239	M110	2	0	Reactome Gene Sets	6	Synthesis of DNA		-5.00266	5.77443	6.34226	28133	120	406	10	2.46305	0.769234	5683|5692|5700|5701|5710|5711|5716|5718|7314|9491	PSMA2|PSMB4|PSMC1|PSMC2|PSMD4|PSMD5|PSMD10|PSMD12|UBB|PSMF1	-3.37936	0	1	0	0	-21.1255	20.7879
1	1	0	-4.98055	-4.38672	0	GO:0010564	M110	2	0	GO Biological Processes	19	regulation of cell cycle process	19_GO:0050789 regulation of biological process	-4.98055	4.02574	5.73589	28133	789	124	14	11.2903	2.84202	493|805|4282|5300|5692|5710|5711|5718|8452|8883|9491|11331|11335|203068	ATP2B4|CALM2|MIF|PIN1|PSMB4|PSMD4|PSMD5|PSMD12|CUL3|NAE1|PSMF1|PHB2|CBX3|TUBB	-3.24386	0	1	0	0	-21.1255	20.7879
1	0	0	-3.27666	0	0	R-HSA-453279	M100	1	0	Reactome Gene Sets	6	Mitotic G1 phase and G1/S transition		-4.93951	5.1156	6.09513	28133	149	406	11	2.70936	0.80576	5683|5692|5700|5701|5710|5711|5716|5718|6714|7314|9491	PSMA2|PSMB4|PSMC1|PSMC2|PSMD4|PSMD5|PSMD10|PSMD12|SRC|UBB|PSMF1	-3.32245	0	1	0	0	-21.1255	20.7879
1	1	1	-4.15708	-2.70429	-2.82336	GO:1903706	M111	3	0	GO Biological Processes	19	regulation of hemopoiesis	19_GO:0002376 immune system process	-4.91044	2.94566	5.27935	28133	494	406	21	5.17241	1.09913	2185|3020|3146|4860|5591|5683|5692|5700|5701|5710|5711|5716|5718|6647|8359|8546|8943|9491|57095|60682|80349	PTK2B|H3-3A|HMGB1|PNP|PRKDC|PSMA2|PSMB4|PSMC1|PSMC2|PSMD4|PSMD5|PSMD10|PSMD12|SOD1|H4C1|AP3B1|AP3D1|PSMF1|PITHD1|SMAP1|WDR61	-3.29583	0	1	0	0	-21.1255	20.7879
1	1	0	-4.90433	-4.14915	0	GO:2000027	M110	2	0	GO Biological Processes	19	regulation of animal organ morphogenesis	19_GO:0032502 developmental process	-4.90433	7.50013	6.7571	28133	242	124	8	6.45161	2.20618	1175|5692|5710|5711|5718|9491|10409|11331	AP2S1|PSMB4|PSMD4|PSMD5|PSMD12|PSMF1|BASP1|PHB2	-3.18789	0	1	0	0	-21.1255	20.7879
1	1	0	-4.57867	-4.26925	0	GO:0002009	M110	2	0	GO Biological Processes	19	morphogenesis of an epithelium	19_GO:0032502 developmental process	-4.8803	2.84412	5.21618	28133	536	406	22	5.41872	1.12354	960|1175|3371|5361|5683|5692|5700|5701|5710|5711|5716|5718|5879|5898|6714|7430|9491|10155|11331|23122|23654|65009	CD44|AP2S1|TNC|PLXNA1|PSMA2|PSMB4|PSMC1|PSMC2|PSMD4|PSMD5|PSMD10|PSMD12|RAC1|RALA|SRC|EZR|PSMF1|TRIM28|PHB2|CLASP2|PLXNB2|NDRG4	-3.26958	0	1	0	0	-21.1255	20.7879
1	1	0	-3.57954	-2.2247	0	R-HSA-69306	M110	2	0	Reactome Gene Sets	6	DNA Replication		-4.75596	5.41352	6.05598	28133	128	406	10	2.46305	0.769234	5683|5692|5700|5701|5710|5711|5716|5718|7314|9491	PSMA2|PSMB4|PSMC1|PSMC2|PSMD4|PSMD5|PSMD10|PSMD12|UBB|PSMF1	-3.16123	0	1	0	0	-21.1255	20.7879
1	1	0	-3.56348	-2.26002	0	GO:0016579	M110	2	0	GO Biological Processes	19	protein deubiquitination	19_GO:0008152 metabolic process	-4.73007	3.65985	5.45159	28133	284	406	15	3.69458	0.936149	5683|5692|5700|5701|5710|5711|5716|5718|5886|7314|7347|7874|8239|9491|55611	PSMA2|PSMB4|PSMC1|PSMC2|PSMD4|PSMD5|PSMD10|PSMD12|RAD23A|UBB|UCHL3|USP7|USP9X|PSMF1|OTUB1	-3.13608	0	1	0	0	-21.1255	20.7879
1	1	0	-3.533	-2.18958	0	R-HSA-69206	M110	2	0	Reactome Gene Sets	6	G1/S Transition		-4.66827	5.28955	5.95477	28133	131	406	10	2.46305	0.769234	5683|5692|5700|5701|5710|5711|5716|5718|7314|9491	PSMA2|PSMB4|PSMC1|PSMC2|PSMD4|PSMD5|PSMD10|PSMD12|UBB|PSMF1	-3.08752	0	1	0	0	-21.1255	20.7879
1	0	0	-3.12444	0	0	GO:0002244	M100	1	0	GO Biological Processes	19	hematopoietic progenitor cell differentiation	19_GO:0002376 immune system process	-4.62379	4.73431	5.75008	28133	161	406	11	2.70936	0.80576	5591|5683|5692|5700|5701|5710|5711|5716|5718|8546|9491	PRKDC|PSMA2|PSMB4|PSMC1|PSMC2|PSMD4|PSMD5|PSMD10|PSMD12|AP3B1|PSMF1	-3.04664	0	1	0	0	-21.1255	20.7879
1	1	0	-3.87921	-3.54068	0	GO:0006511	M110	2	0	GO Biological Processes	19	ubiquitin-dependent protein catabolic process	19_GO:0008152 metabolic process	-4.60677	2.5904	4.93275	28133	642	406	24	5.91133	1.17044	408|2185|5094|5683|5692|5700|5701|5710|5711|5716|5718|5886|6923|7314|7332|7347|7874|8239|8452|9491|10134|23321|29978|54472	ARRB1|PTK2B|PCBP2|PSMA2|PSMB4|PSMC1|PSMC2|PSMD4|PSMD5|PSMD10|PSMD12|RAD23A|ELOB|UBB|UBE2L3|UCHL3|USP7|USP9X|CUL3|PSMF1|BCAP31|TRIM2|UBQLN2|TOLLIP	-3.03287	0	1	0	0	-21.1255	20.7879
1	1	0	-4.57879	-3.56521	0	GO:0048729	M110	2	0	GO Biological Processes	19	tissue morphogenesis	19_GO:0032502 developmental process	-4.57879	4.26732	5.5544	28133	638	124	12	9.67742	2.65502	1175|3371|3691|5692|5710|5711|5718|5898|9491|11331|23122|23654	AP2S1|TNC|ITGB4|PSMB4|PSMD4|PSMD5|PSMD12|RALA|PSMF1|PHB2|CLASP2|PLXNB2	-2.96639	0	1	0	0	-21.1255	20.7879
1	1	0	-3.53793	-2.22364	0	GO:0002429	M110	2	0	GO Biological Processes	19	immune response-activating cell surface receptor signaling pathway	19_GO:0002376 immune system process	-4.56801	2.88121	5.03568	28133	481	406	20	4.92611	1.07404	952|5683|5692|5700|5701|5710|5711|5716|5718|5879|6714|7070|7430|7525|9491|10095|10096|10384|10787|29085	CD38|PSMA2|PSMB4|PSMC1|PSMC2|PSMD4|PSMD5|PSMD10|PSMD12|RAC1|SRC|THY1|EZR|YES1|PSMF1|ARPC1B|ACTR3|BTN3A3|NCKAP1|PHPT1	-2.99868	0	1	0	0	-21.1255	20.7879
1	1	0	-3.84404	-3.50427	0	GO:0019941	M110	2	0	GO Biological Processes	19	modification-dependent protein catabolic process	19_GO:0008152 metabolic process	-4.54233	2.56641	4.88155	28133	648	406	24	5.91133	1.17044	408|2185|5094|5683|5692|5700|5701|5710|5711|5716|5718|5886|6923|7314|7332|7347|7874|8239|8452|9491|10134|23321|29978|54472	ARRB1|PTK2B|PCBP2|PSMA2|PSMB4|PSMC1|PSMC2|PSMD4|PSMD5|PSMD10|PSMD12|RAD23A|ELOB|UBB|UBE2L3|UCHL3|USP7|USP9X|CUL3|PSMF1|BCAP31|TRIM2|UBQLN2|TOLLIP	-2.97651	0	1	0	0	-21.1255	20.7879
1	1	0	-2.9984	-2.7215	0	R-HSA-1640170	M110	2	0	Reactome Gene Sets	6	Cell Cycle		-4.5305	2.50336	4.84539	28133	692	406	25	6.15764	1.19301	1778|1780|3020|5577|5683|5692|5700|5701|5710|5711|5716|5718|6714|7314|8359|9491|10111|10383|11258|22919|23122|26003|84617|84790|203068	DYNC1H1|DYNC1I1|H3-3A|PRKAR2B|PSMA2|PSMB4|PSMC1|PSMC2|PSMD4|PSMD5|PSMD10|PSMD12|SRC|UBB|H4C1|PSMF1|RAD50|TUBB4B|DCTN3|MAPRE1|CLASP2|GORASP2|TUBB6|TUBA1C|TUBB	-2.96678	0	1	0	0	-21.1255	20.7879
1	1	0	-3.80354	-2.90938	0	GO:0007346	M110	2	0	GO Biological Processes	19	regulation of mitotic cell cycle	19_GO:0050789 regulation of biological process	-4.46831	2.53898	4.82252	28133	655	406	24	5.91133	1.17044	637|1778|5300|5577|5591|5683|5692|5700|5701|5710|5711|5716|5718|5962|7155|8452|8826|8883|9491|10383|11258|11331|22919|203068	BID|DYNC1H1|PIN1|PRKAR2B|PRKDC|PSMA2|PSMB4|PSMC1|PSMC2|PSMD4|PSMD5|PSMD10|PSMD12|RDX|TOP2B|CUL3|IQGAP1|NAE1|PSMF1|TUBB4B|DCTN3|PHB2|MAPRE1|TUBB	-2.91081	0	1	0	0	-21.1255	20.7879
1	1	0	-3.78065	-3.4387	0	GO:0043632	M110	2	0	GO Biological Processes	19	modification-dependent macromolecule catabolic process	19_GO:0008152 metabolic process	-4.42657	2.52357	4.78913	28133	659	406	24	5.91133	1.17044	408|2185|5094|5683|5692|5700|5701|5710|5711|5716|5718|5886|6923|7314|7332|7347|7874|8239|8452|9491|10134|23321|29978|54472	ARRB1|PTK2B|PCBP2|PSMA2|PSMB4|PSMC1|PSMC2|PSMD4|PSMD5|PSMD10|PSMD12|RAD23A|ELOB|UBB|UBE2L3|UCHL3|USP7|USP9X|CUL3|PSMF1|BCAP31|TRIM2|UBQLN2|TOLLIP	-2.87385	0	1	0	0	-21.1255	20.7879
1	1	0	-2.9164	-3.09165	0	R-HSA-1257604	M110	2	0	Reactome Gene Sets	6	PIP3 activates AKT signaling		-4.41926	3.63335	5.23164	28133	267	406	14	3.44828	0.905562	5683|5692|5700|5701|5710|5711|5716|5718|5879|6714|7314|7874|8396|9491	PSMA2|PSMB4|PSMC1|PSMC2|PSMD4|PSMD5|PSMD10|PSMD12|RAC1|SRC|UBB|USP7|PIP4K2B|PSMF1	-2.87125	0	1	0	0	-21.1255	20.7879
1	1	0	-4.39637	-2.91766	0	R-HSA-983169	M110	2	0	Reactome Gene Sets	6	Class I MHC mediated antigen processing & presentation		-4.39637	5.51868	5.82159	28133	370	124	9	7.25806	2.3299	5692|5710|5711|5718|6923|8452|9491|10134|51752	PSMB4|PSMD4|PSMD5|PSMD12|ELOB|CUL3|PSMF1|BCAP31|ERAP1	-2.84433	0	1	0	0	-21.1255	20.7879
1	0	0	-2.96238	0	0	R-HSA-5619115	M100	1	0	Reactome Gene Sets	6	Disorders of transmembrane transporters		-4.29095	4.35557	5.3882	28133	175	406	11	2.70936	0.80576	5683|5692|5700|5701|5710|5711|5716|5718|6520|7314|9491	PSMA2|PSMB4|PSMC1|PSMC2|PSMD4|PSMD5|PSMD10|PSMD12|SLC3A2|UBB|PSMF1	-2.75837	0	1	0	0	-21.1255	20.7879
1	0	0	-4.27063	0	0	GO:0071356	M100	1	0	GO Biological Processes	19	cellular response to tumor necrosis factor	19_GO:0050896 response to stimulus	-4.27063	6.11122	5.89199	28133	297	124	8	6.45161	2.20618	445|5692|5710|5711|5718|8904|9491|84817	ASS1|PSMB4|PSMD4|PSMD5|PSMD12|CPNE1|PSMF1|TXNDC17	-2.75991	0	1	0	0	-21.1255	20.7879
1	1	0	-3.32292	-2.05334	0	GO:0002768	M110	2	0	GO Biological Processes	19	immune response-regulating cell surface receptor signaling pathway	19_GO:0002376 immune system process	-4.15676	2.69099	4.68664	28133	515	406	20	4.92611	1.07404	952|5683|5692|5700|5701|5710|5711|5716|5718|5879|6714|7070|7430|7525|9491|10095|10096|10384|10787|29085	CD38|PSMA2|PSMB4|PSMC1|PSMC2|PSMD4|PSMD5|PSMD10|PSMD12|RAC1|SRC|THY1|EZR|YES1|PSMF1|ARPC1B|ACTR3|BTN3A3|NCKAP1|PHPT1	-2.64789	0	1	0	0	-21.1255	20.7879
1	1	0	-4.03559	-2.01102	0	GO:0034612	M110	2	0	GO Biological Processes	19	response to tumor necrosis factor	19_GO:0050896 response to stimulus	-4.12205	3.238	4.87986	28133	321	406	15	3.69458	0.936149	102|445|2185|2950|5683|5692|5700|5701|5710|5711|5716|5718|8904|9491|84817	ADAM10|ASS1|PTK2B|GSTP1|PSMA2|PSMB4|PSMC1|PSMC2|PSMD4|PSMD5|PSMD10|PSMD12|CPNE1|PSMF1|TXNDC17	-2.61927	0	1	0	0	-21.1255	20.7879
1	0	0	-3.11234	0	0	R-HSA-69242	M100	1	0	Reactome Gene Sets	6	S Phase		-3.88726	4.27735	5.06219	28133	162	406	10	2.46305	0.769234	5683|5692|5700|5701|5710|5711|5716|5718|7314|9491	PSMA2|PSMB4|PSMC1|PSMC2|PSMD4|PSMD5|PSMD10|PSMD12|UBB|PSMF1	-2.42044	0	1	0	0	-21.1255	20.7879
1	1	0	-3.10624	-3.16159	0	GO:0000209	M110	2	0	GO Biological Processes	19	protein polyubiquitination	19_GO:0008152 metabolic process	-3.86035	3.06607	4.63106	28133	339	406	15	3.69458	0.936149	5478|5683|5692|5700|5701|5710|5711|5716|5718|7314|7332|8452|9491|23321|55611	PPIA|PSMA2|PSMB4|PSMC1|PSMC2|PSMD4|PSMD5|PSMD10|PSMD12|UBB|UBE2L3|CUL3|PSMF1|TRIM2|OTUB1	-2.39711	0	1	0	0	-21.1255	20.7879
1	1	0	-3.7439	-2.38919	0	GO:0010565	M110	2	0	GO Biological Processes	19	regulation of cellular ketone metabolic process	19_GO:0050789 regulation of biological process	-3.7439	7.31868	5.75278	28133	186	124	6	4.83871	1.92701	493|5692|5710|5711|5718|9491	ATP2B4|PSMB4|PSMD4|PSMD5|PSMD12|PSMF1	-2.36631	0	1	0	0	-21.1255	20.7879
1	1	0	-3.02995	-2.56681	0	GO:0038095	M110	2	0	GO Biological Processes	19	Fc-epsilon receptor signaling pathway	19_GO:0002376 immune system process	-3.73694	4.10018	4.89151	28133	169	406	10	2.46305	0.769234	5683|5692|5700|5701|5710|5711|5716|5718|5879|9491	PSMA2|PSMB4|PSMC1|PSMC2|PSMD4|PSMD5|PSMD10|PSMD12|RAC1|PSMF1	-2.29611	0	1	0	0	-21.1255	20.7879
1	0	0	-3.70301	0	0	GO:0010948	M100	1	0	GO Biological Processes	19	negative regulation of cell cycle process	19_GO:0048519 negative regulation of biological process	-3.70301	5.0558	5.14597	28133	359	124	8	6.45161	2.20618	4282|5692|5710|5711|5718|8883|9491|11335	MIF|PSMB4|PSMD4|PSMD5|PSMD12|NAE1|PSMF1|CBX3	-2.3393	0	1	0	0	-21.1255	20.7879
1	0	0	-2.50222	0	0	GO:0050851	M100	1	0	GO Biological Processes	19	antigen receptor-mediated signaling pathway	19_GO:0002376 immune system process	-3.54988	3.00342	4.38212	28133	323	406	14	3.44828	0.905562	952|5683|5692|5700|5701|5710|5711|5716|5718|7070|7430|9491|10384|29085	CD38|PSMA2|PSMB4|PSMC1|PSMC2|PSMD4|PSMD5|PSMD10|PSMD12|THY1|EZR|PSMF1|BTN3A3|PHPT1	-2.13632	0	1	0	0	-21.1255	20.7879
1	1	0	-3.34357	-2.08752	0	R-HSA-983168	M110	2	0	Reactome Gene Sets	6	Antigen processing: Ubiquitination & Proteasome degradation		-3.34357	5.13965	4.86851	28133	309	124	7	5.64516	2.07257	5692|5710|5711|5718|6923|8452|9491	PSMB4|PSMD4|PSMD5|PSMD12|ELOB|CUL3|PSMF1	-2.08054	0	1	0	0	-21.1255	20.7879
1	0	0	-3.06326	0	0	GO:1901991	M100	1	0	GO Biological Processes	19	negative regulation of mitotic cell cycle phase transition	19_GO:0048519 negative regulation of biological process	-3.06326	5.4451	4.69725	28133	250	124	6	4.83871	1.92701	5692|5710|5711|5718|8883|9491	PSMB4|PSMD4|PSMD5|PSMD12|NAE1|PSMF1	-1.87692	0	1	0	0	-21.1255	20.7879
1	1	0	-3.0365	-2.50286	0	GO:0042180	M110	2	0	GO Biological Processes	19	cellular ketone metabolic process	19_GO:0008152 metabolic process	-3.0365	5.38053	4.65696	28133	253	124	6	4.83871	1.92701	493|5692|5710|5711|5718|9491	ATP2B4|PSMB4|PSMD4|PSMD5|PSMD12|PSMF1	-1.85599	0	1	0	0	-21.1255	20.7879
1	0	0	-2.9081	0	0	GO:1901988	M100	1	0	GO Biological Processes	19	negative regulation of cell cycle phase transition	19_GO:0048519 negative regulation of biological process	-2.9081	5.07938	4.46472	28133	268	124	6	4.83871	1.92701	5692|5710|5711|5718|8883|9491	PSMB4|PSMD4|PSMD5|PSMD12|NAE1|PSMF1	-1.76612	0	1	0	0	-21.1255	20.7879
1	0	0	-2.23652	0	0	GO:0048863	M100	1	0	GO Biological Processes	19	stem cell differentiation	19_GO:0032502 developmental process	-2.85063	2.95436	3.81609	28133	258	406	11	2.70936	0.80576	1000|5591|5683|5692|5700|5701|5710|5711|5716|5718|9491	CDH2|PRKDC|PSMA2|PSMB4|PSMC1|PSMC2|PSMD4|PSMD5|PSMD10|PSMD12|PSMF1	-1.5421	0	1	0	0	-21.1255	20.7879
1	0	0	-2.45668	0	0	GO:0045930	M100	1	0	GO Biological Processes	19	negative regulation of mitotic cell cycle	19_GO:0048519 negative regulation of biological process	-2.48452	2.51975	3.36043	28133	330	406	12	2.95567	0.840523	5591|5683|5692|5700|5701|5710|5711|5716|5718|7155|8883|9491	PRKDC|PSMA2|PSMB4|PSMC1|PSMC2|PSMD4|PSMD5|PSMD10|PSMD12|TOP2B|NAE1|PSMF1	-1.23044	0	1	0	0	-21.1255	20.7879
1	0	0	-2.17362	0	0	GO:0045786	M100	1	0	GO Biological Processes	19	negative regulation of cell cycle	19_GO:0048519 negative regulation of biological process	-2.17362	2.89479	3.19259	28133	627	124	8	6.45161	2.20618	4282|5692|5710|5711|5718|8883|9491|11335	MIF|PSMB4|PSMD4|PSMD5|PSMD12|NAE1|PSMF1|CBX3	-1.21301	0	1	0	0	-21.1255	20.7879
1	1	1	-6.45488	-10.8672	-12.4815	GO:0045055	M111	3	0	GO Biological Processes	19	regulated exocytosis	19_GO:0051179 localization	-20.9323	4.79721	13.0143	28133	780	406	54	13.3005	1.68531	47|88|102|210|353|960|966|1020|1778|2039|2244|2934|2950|3146|3728|4282|4860|5269|5478|5582|5683|5701|5718|5879|6284|6616|6647|6804|6812|7450|8499|8541|8826|8895|8904|9588|9900|10383|11240|23071|23114|23406|25801|25840|26059|51382|54472|55276|57020|80331|93100|112755|140885|203068	ACLY|ACTN2|ADAM10|ALAD|APRT|CD44|CD59|CDK5|DYNC1H1|DMTN|FGB|GSN|GSTP1|HMGB1|JUP|MIF|PNP|SERPINB6|PPIA|PRKCG|PSMA2|PSMC2|PSMD12|RAC1|S100A13|SNAP25|SOD1|STX1A|STXBP1|VWF|PPFIA2|PPFIA3|IQGAP1|CPNE3|CPNE1|PRDX6|SV2A|TUBB4B|PADI2|ERP44|NFASC|COTL1|GCA|METTL7A|ERC2|ATP6V1D|TOLLIP|PGM2|VPS35L|DNAJC5|NAPRT|STX1B|SIRPA|TUBB	-17.0506	0	2	1	1	-20.9323	5.63006
1	1	1	-7.64224	-11.2394	-8	GO:0002444	M111	3	0	GO Biological Processes	19	myeloid leukocyte mediated immunity	19_GO:0002376 immune system process	-18.5738	5.39783	12.6274	28133	552	406	43	10.5911	1.52721	47|102|210|353|960|966|1778|2934|2950|3146|3728|4282|4860|5269|5272|5478|5683|5701|5718|5879|6284|6616|6812|8826|8895|8904|9588|10383|11240|23071|23114|23406|25801|25840|51382|54472|55276|57020|57506|80331|93100|140885|203068	ACLY|ADAM10|ALAD|APRT|CD44|CD59|DYNC1H1|GSN|GSTP1|HMGB1|JUP|MIF|PNP|SERPINB6|SERPINB9|PPIA|PSMA2|PSMC2|PSMD12|RAC1|S100A13|SNAP25|STXBP1|IQGAP1|CPNE3|CPNE1|PRDX6|TUBB4B|PADI2|ERP44|NFASC|COTL1|GCA|METTL7A|ATP6V1D|TOLLIP|PGM2|VPS35L|MAVS|DNAJC5|NAPRT|SIRPA|TUBB	-14.993	0	2	0	0	-20.9323	5.63006
1	1	1	-5.823	-10.493	-8.23865	R-HSA-6798695	M111	3	0	Reactome Gene Sets	6	Neutrophil degranulation		-17.4939	5.63006	12.3808	28133	480	406	39	9.60591	1.46243	47|102|210|353|960|966|1778|2934|2950|3146|3728|4282|4860|5269|5478|5683|5701|5718|5879|6616|8826|8895|8904|9588|10383|11240|23071|23114|23406|25801|25840|51382|54472|55276|57020|80331|93100|140885|203068	ACLY|ADAM10|ALAD|APRT|CD44|CD59|DYNC1H1|GSN|GSTP1|HMGB1|JUP|MIF|PNP|SERPINB6|PPIA|PSMA2|PSMC2|PSMD12|RAC1|SNAP25|IQGAP1|CPNE3|CPNE1|PRDX6|TUBB4B|PADI2|ERP44|NFASC|COTL1|GCA|METTL7A|ATP6V1D|TOLLIP|PGM2|VPS35L|DNAJC5|NAPRT|SIRPA|TUBB	-14.0381	0	2	0	0	-20.9323	5.63006
1	1	1	-6.93986	-10.5539	-7.46068	GO:0043299	M111	3	0	GO Biological Processes	19	leukocyte degranulation	19_GO:0002376 immune system process	-17.4075	5.29053	12.1475	28133	537	406	41	10.0985	1.49537	47|102|210|353|960|966|1778|2934|2950|3146|3728|4282|4860|5269|5478|5683|5701|5718|5879|6284|6616|6812|8826|8895|8904|9588|10383|11240|23071|23114|23406|25801|25840|51382|54472|55276|57020|80331|93100|140885|203068	ACLY|ADAM10|ALAD|APRT|CD44|CD59|DYNC1H1|GSN|GSTP1|HMGB1|JUP|MIF|PNP|SERPINB6|PPIA|PSMA2|PSMC2|PSMD12|RAC1|S100A13|SNAP25|STXBP1|IQGAP1|CPNE3|CPNE1|PRDX6|TUBB4B|PADI2|ERP44|NFASC|COTL1|GCA|METTL7A|ATP6V1D|TOLLIP|PGM2|VPS35L|DNAJC5|NAPRT|SIRPA|TUBB	-14.0028	0	2	0	0	-20.9323	5.63006
1	1	1	-5.76714	-10.4009	-8.15153	GO:0043312	M111	3	0	GO Biological Processes	19	neutrophil degranulation	19_GO:0002376 immune system process	-17.3085	5.56056	12.2722	28133	486	406	39	9.60591	1.46243	47|102|210|353|960|966|1778|2934|2950|3146|3728|4282|4860|5269|5478|5683|5701|5718|5879|6616|8826|8895|8904|9588|10383|11240|23071|23114|23406|25801|25840|51382|54472|55276|57020|80331|93100|140885|203068	ACLY|ADAM10|ALAD|APRT|CD44|CD59|DYNC1H1|GSN|GSTP1|HMGB1|JUP|MIF|PNP|SERPINB6|PPIA|PSMA2|PSMC2|PSMD12|RAC1|SNAP25|IQGAP1|CPNE3|CPNE1|PRDX6|TUBB4B|PADI2|ERP44|NFASC|COTL1|GCA|METTL7A|ATP6V1D|TOLLIP|PGM2|VPS35L|DNAJC5|NAPRT|SIRPA|TUBB	-13.9496	0	2	0	0	-20.9323	5.63006
1	1	1	-5.73952	-10.3553	-8.10846	GO:0002283	M111	3	0	GO Biological Processes	19	neutrophil activation involved in immune response	19_GO:0002376 immune system process	-17.2169	5.52644	12.2186	28133	489	406	39	9.60591	1.46243	47|102|210|353|960|966|1778|2934|2950|3146|3728|4282|4860|5269|5478|5683|5701|5718|5879|6616|8826|8895|8904|9588|10383|11240|23071|23114|23406|25801|25840|51382|54472|55276|57020|80331|93100|140885|203068	ACLY|ADAM10|ALAD|APRT|CD44|CD59|DYNC1H1|GSN|GSTP1|HMGB1|JUP|MIF|PNP|SERPINB6|PPIA|PSMA2|PSMC2|PSMD12|RAC1|SNAP25|IQGAP1|CPNE3|CPNE1|PRDX6|TUBB4B|PADI2|ERP44|NFASC|COTL1|GCA|METTL7A|ATP6V1D|TOLLIP|PGM2|VPS35L|DNAJC5|NAPRT|SIRPA|TUBB	-13.9099	0	2	0	0	-20.9323	5.63006
1	1	1	-5.869	-9.80371	-8.09764	GO:0002274	M111	3	0	GO Biological Processes	19	myeloid leukocyte activation	19_GO:0002376 immune system process	-17.1896	4.72453	11.7166	28133	660	406	45	11.0837	1.55801	47|102|210|353|960|966|1778|2934|2950|3146|3696|3728|4137|4282|4345|4860|5269|5478|5683|5701|5718|5879|6284|6616|6812|8826|8895|8904|9588|10383|11240|23071|23114|23406|25801|25840|51382|54472|55276|57020|80331|93100|140885|203068|399687	ACLY|ADAM10|ALAD|APRT|CD44|CD59|DYNC1H1|GSN|GSTP1|HMGB1|ITGB8|JUP|MAPT|MIF|CD200|PNP|SERPINB6|PPIA|PSMA2|PSMC2|PSMD12|RAC1|S100A13|SNAP25|STXBP1|IQGAP1|CPNE3|CPNE1|PRDX6|TUBB4B|PADI2|ERP44|NFASC|COTL1|GCA|METTL7A|ATP6V1D|TOLLIP|PGM2|VPS35L|DNAJC5|NAPRT|SIRPA|TUBB|MYO18A	-13.9099	0	2	0	0	-20.9323	5.63006
1	1	1	-6.81347	-10.3691	-7.29756	GO:0002275	M111	3	0	GO Biological Processes	19	myeloid cell activation involved in immune response	19_GO:0002376 immune system process	-17.0381	5.16549	11.9382	28133	550	406	41	10.0985	1.49537	47|102|210|353|960|966|1778|2934|2950|3146|3728|4282|4860|5269|5478|5683|5701|5718|5879|6284|6616|6812|8826|8895|8904|9588|10383|11240|23071|23114|23406|25801|25840|51382|54472|55276|57020|80331|93100|140885|203068	ACLY|ADAM10|ALAD|APRT|CD44|CD59|DYNC1H1|GSN|GSTP1|HMGB1|JUP|MIF|PNP|SERPINB6|PPIA|PSMA2|PSMC2|PSMD12|RAC1|S100A13|SNAP25|STXBP1|IQGAP1|CPNE3|CPNE1|PRDX6|TUBB4B|PADI2|ERP44|NFASC|COTL1|GCA|METTL7A|ATP6V1D|TOLLIP|PGM2|VPS35L|DNAJC5|NAPRT|SIRPA|TUBB	-13.7931	0	2	0	0	-20.9323	5.63006
1	1	1	-5.63994	-10.1911	-7.95327	GO:0002446	M111	3	0	GO Biological Processes	19	neutrophil mediated immunity	19_GO:0002376 immune system process	-16.8868	5.40486	12.0258	28133	500	406	39	9.60591	1.46243	47|102|210|353|960|966|1778|2934|2950|3146|3728|4282|4860|5269|5478|5683|5701|5718|5879|6616|8826|8895|8904|9588|10383|11240|23071|23114|23406|25801|25840|51382|54472|55276|57020|80331|93100|140885|203068	ACLY|ADAM10|ALAD|APRT|CD44|CD59|DYNC1H1|GSN|GSTP1|HMGB1|JUP|MIF|PNP|SERPINB6|PPIA|PSMA2|PSMC2|PSMD12|RAC1|SNAP25|IQGAP1|CPNE3|CPNE1|PRDX6|TUBB4B|PADI2|ERP44|NFASC|COTL1|GCA|METTL7A|ATP6V1D|TOLLIP|PGM2|VPS35L|DNAJC5|NAPRT|SIRPA|TUBB	-13.6744	0	2	0	0	-20.9323	5.63006
1	1	1	-5.63101	-10.1763	-7.93937	GO:0042119	M111	3	0	GO Biological Processes	19	neutrophil activation	19_GO:0002376 immune system process	-16.8572	5.39407	12.0086	28133	501	406	39	9.60591	1.46243	47|102|210|353|960|966|1778|2934|2950|3146|3728|4282|4860|5269|5478|5683|5701|5718|5879|6616|8826|8895|8904|9588|10383|11240|23071|23114|23406|25801|25840|51382|54472|55276|57020|80331|93100|140885|203068	ACLY|ADAM10|ALAD|APRT|CD44|CD59|DYNC1H1|GSN|GSTP1|HMGB1|JUP|MIF|PNP|SERPINB6|PPIA|PSMA2|PSMC2|PSMD12|RAC1|SNAP25|IQGAP1|CPNE3|CPNE1|PRDX6|TUBB4B|PADI2|ERP44|NFASC|COTL1|GCA|METTL7A|ATP6V1D|TOLLIP|PGM2|VPS35L|DNAJC5|NAPRT|SIRPA|TUBB	-13.6744	0	2	0	0	-20.9323	5.63006
1	1	1	-5.58671	-10.1032	-7.87038	GO:0036230	M111	3	0	GO Biological Processes	19	granulocyte activation	19_GO:0002376 immune system process	-16.7105	5.34077	11.923	28133	506	406	39	9.60591	1.46243	47|102|210|353|960|966|1778|2934|2950|3146|3728|4282|4860|5269|5478|5683|5701|5718|5879|6616|8826|8895|8904|9588|10383|11240|23071|23114|23406|25801|25840|51382|54472|55276|57020|80331|93100|140885|203068	ACLY|ADAM10|ALAD|APRT|CD44|CD59|DYNC1H1|GSN|GSTP1|HMGB1|JUP|MIF|PNP|SERPINB6|PPIA|PSMA2|PSMC2|PSMD12|RAC1|SNAP25|IQGAP1|CPNE3|CPNE1|PRDX6|TUBB4B|PADI2|ERP44|NFASC|COTL1|GCA|METTL7A|ATP6V1D|TOLLIP|PGM2|VPS35L|DNAJC5|NAPRT|SIRPA|TUBB	-13.582	0	2	0	0	-20.9323	5.63006
1	1	1	-5.40354	-9.07876	-6.73335	GO:0002263	M111	3	0	GO Biological Processes	19	cell activation involved in immune response	19_GO:0002376 immune system process	-14.2964	4.11547	10.2768	28133	724	406	43	10.5911	1.52721	47|102|210|353|960|966|1778|2185|2934|2950|3146|3728|4035|4282|4860|5269|5478|5683|5701|5718|5879|6284|6616|6812|8826|8895|8904|9588|10383|11240|23071|23114|23406|25801|25840|51382|54472|55276|57020|80331|93100|140885|203068	ACLY|ADAM10|ALAD|APRT|CD44|CD59|DYNC1H1|PTK2B|GSN|GSTP1|HMGB1|JUP|LRP1|MIF|PNP|SERPINB6|PPIA|PSMA2|PSMC2|PSMD12|RAC1|S100A13|SNAP25|STXBP1|IQGAP1|CPNE3|CPNE1|PRDX6|TUBB4B|PADI2|ERP44|NFASC|COTL1|GCA|METTL7A|ATP6V1D|TOLLIP|PGM2|VPS35L|DNAJC5|NAPRT|SIRPA|TUBB	-11.2992	0	2	0	0	-20.9323	5.63006
1	1	1	-5.43112	-8.34418	-6.14219	GO:0002366	M111	3	0	GO Biological Processes	19	leukocyte activation involved in immune response	19_GO:0002376 immune system process	-13.7041	4.0421	10.0063	28133	720	406	42	10.3448	1.51142	47|102|210|353|960|966|1778|2185|2934|2950|3146|3728|4282|4860|5269|5478|5683|5701|5718|5879|6284|6616|6812|8826|8895|8904|9588|10383|11240|23071|23114|23406|25801|25840|51382|54472|55276|57020|80331|93100|140885|203068	ACLY|ADAM10|ALAD|APRT|CD44|CD59|DYNC1H1|PTK2B|GSN|GSTP1|HMGB1|JUP|MIF|PNP|SERPINB6|PPIA|PSMA2|PSMC2|PSMD12|RAC1|S100A13|SNAP25|STXBP1|IQGAP1|CPNE3|CPNE1|PRDX6|TUBB4B|PADI2|ERP44|NFASC|COTL1|GCA|METTL7A|ATP6V1D|TOLLIP|PGM2|VPS35L|DNAJC5|NAPRT|SIRPA|TUBB	-10.7254	0	2	0	0	-20.9323	5.63006
1	1	1	-8.08498	-8.77582	-11.5876	GO:0032990	M111	3	0	GO Biological Processes	19	cell part morphogenesis	19_GO:0032502 developmental process	-19.7421	5.00053	12.7691	28133	679	406	49	12.069	1.61675	102|214|348|960|1000|1020|1627|2596|2817|3925|4035|4137|4884|4974|5361|5786|5879|6285|6643|6714|6742|6812|7070|7143|7155|7204|7314|7430|8239|8499|8826|8904|9201|9369|9693|10211|10752|10763|10787|11313|23043|23111|23114|23499|23654|26047|55201|55740|79784	ADAM10|ALCAM|APOE|CD44|CDH2|CDK5|DBN1|GAP43|GPC1|STMN1|LRP1|MAPT|NPTX1|OMG|PLXNA1|PTPRA|RAC1|S100B|SNX2|SRC|SSBP1|STXBP1|THY1|TNR|TOP2B|TRIO|UBB|EZR|USP9X|PPFIA2|IQGAP1|CPNE1|DCLK1|NRXN3|RAPGEF2|FLOT1|CHL1|NES|NCKAP1|LYPLA2|TNIK|SPART|NFASC|MACF1|PLXNB2|CNTNAP2|MAP1S|ENAH|MYH14	-15.9853	0	3	1	1	-19.7421	5.2723
1	1	1	-7.40965	-8.16252	-11.8273	GO:0048858	M111	3	0	GO Biological Processes	19	cell projection morphogenesis	19_GO:0032502 developmental process	-18.6254	4.91218	12.3355	28133	663	406	47	11.5764	1.58784	102|214|348|960|1000|1020|1627|2596|2817|3925|4035|4137|4884|4974|5361|5786|5879|6285|6643|6714|6812|7070|7143|7155|7204|7314|7430|8239|8499|8826|8904|9201|9369|9693|10211|10752|10763|10787|11313|23043|23111|23114|23499|23654|26047|55201|55740	ADAM10|ALCAM|APOE|CD44|CDH2|CDK5|DBN1|GAP43|GPC1|STMN1|LRP1|MAPT|NPTX1|OMG|PLXNA1|PTPRA|RAC1|S100B|SNX2|SRC|STXBP1|THY1|TNR|TOP2B|TRIO|UBB|EZR|USP9X|PPFIA2|IQGAP1|CPNE1|DCLK1|NRXN3|RAPGEF2|FLOT1|CHL1|NES|NCKAP1|LYPLA2|TNIK|SPART|NFASC|MACF1|PLXNB2|CNTNAP2|MAP1S|ENAH	-14.993	0	3	0	0	-19.7421	5.2723
1	1	1	-7.44582	-8.20486	-11.0931	GO:0120039	M111	3	0	GO Biological Processes	19	plasma membrane bounded cell projection morphogenesis	19_GO:0032502 developmental process	-17.9673	4.83685	12.0606	28133	659	406	46	11.33	1.57304	102|214|348|960|1000|1020|1627|2596|2817|3925|4035|4137|4884|4974|5361|5786|5879|6285|6643|6714|6812|7070|7143|7155|7204|7314|7430|8239|8499|8826|8904|9201|9369|9693|10211|10752|10787|11313|23043|23111|23114|23499|23654|26047|55201|55740	ADAM10|ALCAM|APOE|CD44|CDH2|CDK5|DBN1|GAP43|GPC1|STMN1|LRP1|MAPT|NPTX1|OMG|PLXNA1|PTPRA|RAC1|S100B|SNX2|SRC|STXBP1|THY1|TNR|TOP2B|TRIO|UBB|EZR|USP9X|PPFIA2|IQGAP1|CPNE1|DCLK1|NRXN3|RAPGEF2|FLOT1|CHL1|NCKAP1|LYPLA2|TNIK|SPART|NFASC|MACF1|PLXNB2|CNTNAP2|MAP1S|ENAH	-14.4535	0	3	0	0	-19.7421	5.2723
1	1	1	-6.76435	-7.5783	-11.3005	GO:0048812	M111	3	0	GO Biological Processes	19	neuron projection morphogenesis	19_GO:0032502 developmental process	-16.8195	4.72697	11.5871	28133	645	406	44	10.8374	1.54274	102|214|348|1000|1020|1627|2596|2817|3925|4035|4137|4884|4974|5361|5786|5879|6285|6714|6812|7070|7143|7155|7204|7314|7430|8239|8499|8826|8904|9201|9369|9693|10211|10752|10787|11313|23043|23111|23114|23499|23654|26047|55201|55740	ADAM10|ALCAM|APOE|CDH2|CDK5|DBN1|GAP43|GPC1|STMN1|LRP1|MAPT|NPTX1|OMG|PLXNA1|PTPRA|RAC1|S100B|SRC|STXBP1|THY1|TNR|TOP2B|TRIO|UBB|EZR|USP9X|PPFIA2|IQGAP1|CPNE1|DCLK1|NRXN3|RAPGEF2|FLOT1|CHL1|NCKAP1|LYPLA2|TNIK|SPART|NFASC|MACF1|PLXNB2|CNTNAP2|MAP1S|ENAH	-13.6647	0	3	0	0	-19.7421	5.2723
1	1	1	-6.89662	-9.08949	-10.2096	GO:0000904	M111	3	0	GO Biological Processes	19	cell morphogenesis involved in differentiation	19_GO:0032502 developmental process	-15.701	4.31285	10.9201	28133	723	406	45	11.0837	1.55801	102|214|348|1000|1020|1627|2039|2244|2596|2817|3925|4035|4137|4884|4974|5361|5591|5786|5879|6285|6647|6714|6812|7070|7143|7155|7204|7430|8239|8452|8499|9201|9369|9693|10211|10752|11313|23043|23111|23114|23499|23654|55201|55740|80781	ADAM10|ALCAM|APOE|CDH2|CDK5|DBN1|DMTN|FGB|GAP43|GPC1|STMN1|LRP1|MAPT|NPTX1|OMG|PLXNA1|PRKDC|PTPRA|RAC1|S100B|SOD1|SRC|STXBP1|THY1|TNR|TOP2B|TRIO|EZR|USP9X|CUL3|PPFIA2|DCLK1|NRXN3|RAPGEF2|FLOT1|CHL1|LYPLA2|TNIK|SPART|NFASC|MACF1|PLXNB2|MAP1S|ENAH|COL18A1	-12.6209	0	3	0	0	-19.7421	5.2723
1	1	1	-5.75118	-8.2971	-10.7062	GO:0048667	M111	3	0	GO Biological Processes	19	cell morphogenesis involved in neuron differentiation	19_GO:0032502 developmental process	-15.4974	4.78709	11.142	28133	579	406	40	9.85222	1.47905	102|214|348|1000|1020|1627|2596|2817|3925|4035|4137|4884|4974|5361|5786|5879|6285|6647|6714|6812|7070|7143|7155|7204|7430|8239|8499|9201|9369|9693|10211|10752|11313|23043|23111|23114|23499|23654|55201|55740	ADAM10|ALCAM|APOE|CDH2|CDK5|DBN1|GAP43|GPC1|STMN1|LRP1|MAPT|NPTX1|OMG|PLXNA1|PTPRA|RAC1|S100B|SOD1|SRC|STXBP1|THY1|TNR|TOP2B|TRIO|EZR|USP9X|PPFIA2|DCLK1|NRXN3|RAPGEF2|FLOT1|CHL1|LYPLA2|TNIK|SPART|NFASC|MACF1|PLXNB2|MAP1S|ENAH	-12.4395	0	3	0	0	-19.7421	5.2723
1	1	1	-5.57792	-7.51246	-10.2242	GO:0061564	M111	3	0	GO Biological Processes	19	axon development	19_GO:0032502 developmental process	-15.1106	5.05689	11.1545	28133	507	406	37	9.1133	1.42832	214|348|1000|1020|1627|2596|2817|3371|3925|4035|4137|4685|4884|4974|5361|5786|5879|6285|6714|6812|7070|7143|7155|7204|7430|8239|9201|9369|10211|10752|11313|23111|23114|23499|23654|55201|55740	ALCAM|APOE|CDH2|CDK5|DBN1|GAP43|GPC1|TNC|STMN1|LRP1|MAPT|NCAM2|NPTX1|OMG|PLXNA1|PTPRA|RAC1|S100B|SRC|STXBP1|THY1|TNR|TOP2B|TRIO|EZR|USP9X|DCLK1|NRXN3|FLOT1|CHL1|LYPLA2|SPART|NFASC|MACF1|PLXNB2|MAP1S|ENAH	-12.0739	0	3	0	0	-19.7421	5.2723
1	1	1	-5.19465	-7.25626	-9.34877	GO:0007409	M111	3	0	GO Biological Processes	19	axonogenesis	19_GO:0032502 developmental process	-14.861	5.2723	11.1796	28133	460	406	35	8.62069	1.39294	214|348|1000|1020|1627|2596|2817|3925|4035|4137|4884|4974|5361|5786|5879|6285|6714|6812|7070|7143|7155|7204|7430|8239|9201|9369|10211|10752|11313|23111|23114|23499|23654|55201|55740	ALCAM|APOE|CDH2|CDK5|DBN1|GAP43|GPC1|STMN1|LRP1|MAPT|NPTX1|OMG|PLXNA1|PTPRA|RAC1|S100B|SRC|STXBP1|THY1|TNR|TOP2B|TRIO|EZR|USP9X|DCLK1|NRXN3|FLOT1|CHL1|LYPLA2|SPART|NFASC|MACF1|PLXNB2|MAP1S|ENAH	-11.8445	0	3	0	0	-19.7421	5.2723
0	1	1	0	-2.96813	-7.58618	GO:0006935	M011	2	0	GO Biological Processes	19	chemotaxis	19_GO:0040011 locomotion	-8.20719	3.33554	7.25541	28133	644	406	31	7.63547	1.31798	102|214|1012|1020|1652|2185|2596|2817|2950|3146|4035|4282|5361|5478|5786|5879|5898|6714|7143|7204|7430|7857|9369|9647|10752|11240|11313|23114|23654|55740|57118	ADAM10|ALCAM|CDH13|CDK5|DDT|PTK2B|GAP43|GPC1|GSTP1|HMGB1|LRP1|MIF|PLXNA1|PPIA|PTPRA|RAC1|RALA|SRC|TNR|TRIO|EZR|SCG2|NRXN3|PPM1F|CHL1|PADI2|LYPLA2|NFASC|PLXNB2|ENAH|CAMK1D	-6.01855	0	3	0	0	-19.7421	5.2723
0	1	1	0	-2.95734	-7.56323	GO:0042330	M011	2	0	GO Biological Processes	19	taxis	19_GO:0040011 locomotion	-8.17587	3.32521	7.2348	28133	646	406	31	7.63547	1.31798	102|214|1012|1020|1652|2185|2596|2817|2950|3146|4035|4282|5361|5478|5786|5879|5898|6714|7143|7204|7430|7857|9369|9647|10752|11240|11313|23114|23654|55740|57118	ADAM10|ALCAM|CDH13|CDK5|DDT|PTK2B|GAP43|GPC1|GSTP1|HMGB1|LRP1|MIF|PLXNA1|PPIA|PTPRA|RAC1|RALA|SRC|TNR|TRIO|EZR|SCG2|NRXN3|PPM1F|CHL1|PADI2|LYPLA2|NFASC|PLXNB2|ENAH|CAMK1D	-5.99594	0	3	0	0	-19.7421	5.2723
0	1	1	0	-2.99878	-5.80114	GO:0007411	M011	2	0	GO Biological Processes	19	axon guidance	19_GO:0040011 locomotion	-6.86175	4.5028	7.08937	28133	277	406	18	4.4335	1.02156	214|1020|2596|2817|4035|5361|5786|5879|6714|7143|7204|7430|9369|10752|11313|23114|23654|55740	ALCAM|CDK5|GAP43|GPC1|LRP1|PLXNA1|PTPRA|RAC1|SRC|TNR|TRIO|EZR|NRXN3|CHL1|LYPLA2|NFASC|PLXNB2|ENAH	-4.96524	0	3	0	0	-19.7421	5.2723
0	1	1	0	-2.98972	-5.78486	GO:0097485	M011	2	0	GO Biological Processes	19	neuron projection guidance	19_GO:0040011 locomotion	-6.83837	4.4866	7.06944	28133	278	406	18	4.4335	1.02156	214|1020|2596|2817|4035|5361|5786|5879|6714|7143|7204|7430|9369|10752|11313|23114|23654|55740	ALCAM|CDK5|GAP43|GPC1|LRP1|PLXNA1|PTPRA|RAC1|SRC|TNR|TRIO|EZR|NRXN3|CHL1|LYPLA2|NFASC|PLXNB2|ENAH	-4.94929	0	3	0	0	-19.7421	5.2723
1	1	1	-2.58567	-9.82771	-8.12135	GO:0072657	M111	3	0	GO Biological Processes	19	protein localization to membrane	19_GO:0051179 localization	-15.7674	4.52827	11.082	28133	658	406	43	10.5911	1.52721	88|102|348|493|637|1000|1020|1804|2039|2339|2817|2934|3728|4035|4644|4666|5064|5533|5962|6133|6193|6616|6726|6804|6812|7070|7430|8546|8943|9693|9868|10211|23043|23114|23122|23499|25813|26003|27342|30845|55737|112755|375790	ACTN2|ADAM10|APOE|ATP2B4|BID|CDH2|CDK5|DPP6|DMTN|FNTA|GPC1|GSN|JUP|LRP1|MYO5A|NACA|PALM|PPP3CC|RDX|RPL9|RPS5|SNAP25|SRP9|STX1A|STXBP1|THY1|EZR|AP3B1|AP3D1|RAPGEF2|TOMM70|FLOT1|TNIK|NFASC|CLASP2|MACF1|SAMM50|GORASP2|RABGEF1|EHD3|VPS35|STX1B|AGRN	-12.6638	0	4	1	1	-15.7674	5.25327
1	1	1	-2.50222	-9.31705	-3.7041	GO:1990778	M111	3	0	GO Biological Processes	19	protein localization to cell periphery	19_GO:0051179 localization	-10.1337	5.14871	9.07457	28133	323	406	24	5.91133	1.17044	88|102|493|1000|1020|1804|3728|4035|4644|5064|5962|6616|6812|7430|9693|10211|23043|23114|23122|23499|26003|30845|55737|112755	ACTN2|ADAM10|ATP2B4|CDH2|CDK5|DPP6|JUP|LRP1|MYO5A|PALM|RDX|SNAP25|STXBP1|EZR|RAPGEF2|FLOT1|TNIK|NFASC|CLASP2|MACF1|GORASP2|EHD3|VPS35|STX1B	-7.50715	0	4	0	0	-15.7674	5.25327
1	1	1	-2.83512	-8.19337	-2.26159	GO:0072659	M111	3	0	GO Biological Processes	19	protein localization to plasma membrane	19_GO:0051179 localization	-9.09739	5.25327	8.60825	28133	277	406	21	5.17241	1.09913	88|493|1000|1020|1804|3728|4035|4644|5064|5962|6812|7430|9693|10211|23043|23114|23122|23499|26003|30845|55737	ACTN2|ATP2B4|CDH2|CDK5|DPP6|JUP|LRP1|MYO5A|PALM|RDX|STXBP1|EZR|RAPGEF2|FLOT1|TNIK|NFASC|CLASP2|MACF1|GORASP2|EHD3|VPS35	-6.70227	0	4	0	0	-15.7674	5.25327
1	0	1	-3.991	0	-9.32843	GO:0006753	M101	2	0	GO Biological Processes	19	nucleoside phosphate metabolic process	19_GO:0008152 metabolic process	-13.4015	3.95961	9.83853	28133	735	406	42	10.3448	1.51142	47|203|318|353|513|515|521|637|952|954|1329|1340|1347|1854|2023|2631|4199|4724|4729|4842|4860|5138|5208|5224|5636|7381|9377|9551|10111|10591|10632|23498|25874|29796|30833|51181|55276|55856|64077|93100|129607|201626	ACLY|AK1|NUDT2|APRT|ATP5F1D|ATP5PB|ATP5ME|BID|CD38|ENTPD2|COX5B|COX6B1|COX7A2|DUT|ENO1|NIPSNAP2|ME1|NDUFS4|NDUFV2|NOS1|PNP|PDE2A|PFKFB2|PGAM2|PRPSAP2|UQCRB|COX5A|ATP5MF|RAD50|DNPH1|ATP5MG|HAAO|MPC2|UQCR10|NT5C|DCXR|PGM2|ACOT13|LHPP|NAPRT|CMPK2|PDE12	-10.4575	0	5	1	1	-13.4015	21.6541
1	0	1	-4.04124	0	-8.03432	GO:0009117	M101	2	0	GO Biological Processes	19	nucleotide metabolic process	19_GO:0008152 metabolic process	-12.273	3.8178	9.30808	28133	726	406	40	9.85222	1.47905	47|203|318|353|513|515|521|637|952|1329|1340|1347|1854|2023|2631|4199|4724|4729|4842|4860|5138|5208|5224|5636|7381|9377|9551|10111|10591|10632|23498|25874|29796|30833|51181|55276|55856|93100|129607|201626	ACLY|AK1|NUDT2|APRT|ATP5F1D|ATP5PB|ATP5ME|BID|CD38|COX5B|COX6B1|COX7A2|DUT|ENO1|NIPSNAP2|ME1|NDUFS4|NDUFV2|NOS1|PNP|PDE2A|PFKFB2|PGAM2|PRPSAP2|UQCRB|COX5A|ATP5MF|RAD50|DNPH1|ATP5MG|HAAO|MPC2|UQCR10|NT5C|DCXR|PGM2|ACOT13|NAPRT|CMPK2|PDE12	-9.45818	0	5	0	0	-13.4015	21.6541
1	0	1	-2.12074	0	-10.6541	GO:0009123	M101	2	0	GO Biological Processes	19	nucleoside monophosphate metabolic process	19_GO:0008152 metabolic process	-11.4274	5.00053	9.60181	28133	388	406	28	6.89655	1.25758	203|318|353|513|515|521|637|1329|1340|1347|1854|2023|2631|4724|4729|5208|5224|7381|9377|9551|10111|10591|10632|29796|30833|64077|129607|201626	AK1|NUDT2|APRT|ATP5F1D|ATP5PB|ATP5ME|BID|COX5B|COX6B1|COX7A2|DUT|ENO1|NIPSNAP2|NDUFS4|NDUFV2|PFKFB2|PGAM2|UQCRB|COX5A|ATP5MF|RAD50|DNPH1|ATP5MG|UQCR10|NT5C|LHPP|CMPK2|PDE12	-8.68127	0	5	0	0	-13.4015	21.6541
0	1	1	0	-4.82063	-5.90459	GO:0007005	M011	2	0	GO Biological Processes	19	mitochondrion organization	19_GO:0071840 cellular component organization or biogenesis	-10.4849	4.02428	8.67555	28133	551	406	32	7.88177	1.33728	291|293|513|515|521|637|1020|1347|2631|4137|4724|4729|5138|5533|5716|6742|7332|8546|9551|9868|10134|10469|10632|10651|11331|25813|54832|54927|55737|64756|79135|79784	SLC25A4|SLC25A6|ATP5F1D|ATP5PB|ATP5ME|BID|CDK5|COX7A2|NIPSNAP2|MAPT|NDUFS4|NDUFV2|PDE2A|PPP3CC|PSMD10|SSBP1|UBE2L3|AP3B1|ATP5MF|TOMM70|BCAP31|TIMM44|ATP5MG|MTX2|PHB2|SAMM50|VPS13C|CHCHD3|VPS35|ATPAF1|APOO|MYH14	-7.83354	0	5	0	0	-13.4015	21.6541
0	0	1	0	0	-9.52004	GO:0009167	M001	1	0	GO Biological Processes	19	purine ribonucleoside monophosphate metabolic process	19_GO:0008152 metabolic process	-9.52004	6.66571	9.40536	28133	355	214	18	8.41121	1.89733	203|318|353|513|521|637|1329|2023|4724|5208|5224|7381|9551|10632|29796|30833|64077|201626	AK1|NUDT2|APRT|ATP5F1D|ATP5ME|BID|COX5B|ENO1|NDUFS4|PFKFB2|PGAM2|UQCRB|ATP5MF|ATP5MG|UQCR10|NT5C|LHPP|PDE12	-6.5925	0	5	0	0	-13.4015	21.6541
0	0	1	0	0	-9.48082	GO:0009126	M001	1	0	GO Biological Processes	19	purine nucleoside monophosphate metabolic process	19_GO:0008152 metabolic process	-9.48082	6.62837	9.36999	28133	357	214	18	8.41121	1.89733	203|318|353|513|521|637|1329|2023|4724|5208|5224|7381|9551|10632|29796|30833|64077|201626	AK1|NUDT2|APRT|ATP5F1D|ATP5ME|BID|COX5B|ENO1|NDUFS4|PFKFB2|PGAM2|UQCRB|ATP5MF|ATP5MG|UQCR10|NT5C|LHPP|PDE12	-6.58431	0	5	0	0	-13.4015	21.6541
0	1	1	0	-4.5723	-5.45408	R-HSA-8949613	M011	2	0	Reactome Gene Sets	6	Cristae formation		-9.42198	20.1174	12.887	28133	31	406	9	2.21675	0.73068	513|515|521|9551|10632|10651|25813|54927|79135	ATP5F1D|ATP5PB|ATP5ME|ATP5MF|ATP5MG|MTX2|SAMM50|CHCHD3|APOO	-6.9204	0	5	0	0	-13.4015	21.6541
0	0	1	0	0	-9.21333	GO:0009161	M001	1	0	GO Biological Processes	19	ribonucleoside monophosphate metabolic process	19_GO:0008152 metabolic process	-9.21333	6.37824	9.12975	28133	371	214	18	8.41121	1.89733	203|318|353|513|521|637|1329|2023|4724|5208|5224|7381|9551|10632|29796|30833|64077|201626	AK1|NUDT2|APRT|ATP5F1D|ATP5ME|BID|COX5B|ENO1|NDUFS4|PFKFB2|PGAM2|UQCRB|ATP5MF|ATP5MG|UQCR10|NT5C|LHPP|PDE12	-6.3859	0	5	0	0	-13.4015	21.6541
0	0	1	0	0	-7.77314	GO:0072521	M001	1	0	GO Biological Processes	19	purine-containing compound metabolic process	19_GO:0008152 metabolic process	-9.05638	3.53086	7.76165	28133	628	406	32	7.88177	1.33728	47|203|318|353|513|515|521|637|1329|1340|1347|2023|2631|4724|4729|4842|4860|5138|5208|5224|5636|7381|9377|9551|10591|10632|25874|28992|29796|30833|55856|201626	ACLY|AK1|NUDT2|APRT|ATP5F1D|ATP5PB|ATP5ME|BID|COX5B|COX6B1|COX7A2|ENO1|NIPSNAP2|NDUFS4|NDUFV2|NOS1|PNP|PDE2A|PFKFB2|PGAM2|PRPSAP2|UQCRB|COX5A|ATP5MF|DNPH1|ATP5MG|MPC2|MACROD1|UQCR10|NT5C|ACOT13|PDE12	-6.6752	0	5	0	0	-13.4015	21.6541
0	0	1	0	0	-8.19119	GO:0006163	M001	1	0	GO Biological Processes	19	purine nucleotide metabolic process	19_GO:0008152 metabolic process	-9.03706	3.61631	7.79865	28133	594	406	31	7.63547	1.31798	47|203|318|353|513|515|521|637|1329|1340|1347|2023|2631|4724|4729|4842|4860|5138|5208|5224|5636|7381|9377|9551|10591|10632|25874|29796|30833|55856|201626	ACLY|AK1|NUDT2|APRT|ATP5F1D|ATP5PB|ATP5ME|BID|COX5B|COX6B1|COX7A2|ENO1|NIPSNAP2|NDUFS4|NDUFV2|NOS1|PNP|PDE2A|PFKFB2|PGAM2|PRPSAP2|UQCRB|COX5A|ATP5MF|DNPH1|ATP5MG|MPC2|UQCR10|NT5C|ACOT13|PDE12	-6.66042	0	5	0	0	-13.4015	21.6541
0	1	1	0	-3.80976	-4.33027	GO:0006839	M011	2	0	GO Biological Processes	19	mitochondrial transport	19_GO:0051179 localization	-8.49117	5.11388	8.23459	28133	271	406	20	4.92611	1.07404	291|293|513|515|521|637|5533|7263|7332|9551|9868|10134|10469|10632|10651|25813|25874|55737|79751|81855	SLC25A4|SLC25A6|ATP5F1D|ATP5PB|ATP5ME|BID|PPP3CC|TST|UBE2L3|ATP5MF|TOMM70|BCAP31|TIMM44|ATP5MG|MTX2|SAMM50|MPC2|VPS35|SLC25A22|SFXN3	-6.22814	0	5	0	0	-13.4015	21.6541
0	0	1	0	0	-7.57735	GO:0009141	M001	1	0	GO Biological Processes	19	nucleoside triphosphate metabolic process	19_GO:0008152 metabolic process	-8.28256	4.33082	7.78284	28133	368	406	23	5.66502	1.14729	203|318|513|515|521|637|1329|1340|1347|1854|2023|2631|4724|4729|5208|5224|7381|9377|9551|10632|29796|129607|201626	AK1|NUDT2|ATP5F1D|ATP5PB|ATP5ME|BID|COX5B|COX6B1|COX7A2|DUT|ENO1|NIPSNAP2|NDUFS4|NDUFV2|PFKFB2|PGAM2|UQCRB|COX5A|ATP5MF|ATP5MG|UQCR10|CMPK2|PDE12	-6.07287	0	5	0	0	-13.4015	21.6541
0	1	1	0	-4.79872	-4.1693	GO:0007007	M011	2	0	GO Biological Processes	19	inner mitochondrial membrane organization	19_GO:0071840 cellular component organization or biogenesis	-8.16011	12.3738	10.3094	28133	56	406	10	2.46305	0.769234	513|515|521|9551|9868|10632|10651|25813|54927|79135	ATP5F1D|ATP5PB|ATP5ME|ATP5MF|TOMM70|ATP5MG|MTX2|SAMM50|CHCHD3|APOO	-5.99153	0	5	0	0	-13.4015	21.6541
0	0	1	0	0	-7.69202	GO:0046034	M001	1	0	GO Biological Processes	19	ATP metabolic process	19_GO:0008152 metabolic process	-8.14912	4.64906	7.85572	28133	313	406	21	5.17241	1.09913	203|318|513|515|521|637|1329|1340|1347|2023|2631|4724|4729|5208|5224|7381|9377|9551|10632|29796|201626	AK1|NUDT2|ATP5F1D|ATP5PB|ATP5ME|BID|COX5B|COX6B1|COX7A2|ENO1|NIPSNAP2|NDUFS4|NDUFV2|PFKFB2|PGAM2|UQCRB|COX5A|ATP5MF|ATP5MG|UQCR10|PDE12	-5.98334	0	5	0	0	-13.4015	21.6541
0	0	1	0	0	-6.49503	GO:1901293	M001	1	0	GO Biological Processes	19	nucleoside phosphate biosynthetic process	19_GO:0008152 metabolic process	-7.87312	4.11819	7.4743	28133	387	406	23	5.66502	1.14729	47|203|318|353|513|515|521|1854|2023|4199|4842|4860|5208|5224|5636|9551|10111|10632|23498|25874|64077|93100|129607	ACLY|AK1|NUDT2|APRT|ATP5F1D|ATP5PB|ATP5ME|DUT|ENO1|ME1|NOS1|PNP|PFKFB2|PGAM2|PRPSAP2|ATP5MF|RAD50|ATP5MG|HAAO|MPC2|LHPP|NAPRT|CMPK2	-5.74721	0	5	0	0	-13.4015	21.6541
0	0	1	0	0	-6.77957	GO:0019693	M001	1	0	GO Biological Processes	19	ribose phosphate metabolic process	19_GO:0008152 metabolic process	-7.84511	3.383	7.10321	28133	594	406	29	7.14286	1.27815	47|203|318|353|513|515|521|637|1329|1340|1347|2023|2631|4724|4729|5138|5208|5224|5636|7381|9377|9551|10632|25874|29796|30833|55276|55856|201626	ACLY|AK1|NUDT2|APRT|ATP5F1D|ATP5PB|ATP5ME|BID|COX5B|COX6B1|COX7A2|ENO1|NIPSNAP2|NDUFS4|NDUFV2|PDE2A|PFKFB2|PGAM2|PRPSAP2|UQCRB|COX5A|ATP5MF|ATP5MG|MPC2|UQCR10|NT5C|PGM2|ACOT13|PDE12	-5.74148	0	5	0	0	-13.4015	21.6541
0	0	1	0	0	-5.45439	GO:1990542	M001	1	0	GO Biological Processes	19	mitochondrial transmembrane transport	19_GO:0051179 localization	-7.76414	7.63399	8.7384	28133	118	406	13	3.20197	0.873733	291|293|513|515|521|7263|9551|9868|10469|10632|25874|79751|81855	SLC25A4|SLC25A6|ATP5F1D|ATP5PB|ATP5ME|TST|ATP5MF|TOMM70|TIMM44|ATP5MG|MPC2|SLC25A22|SFXN3	-5.67474	0	5	0	0	-13.4015	21.6541
0	1	1	0	-3.00134	-5.18365	GO:0042407	M011	2	0	GO Biological Processes	19	cristae formation	19_GO:0071840 cellular component organization or biogenesis	-7.53168	15.8384	10.6291	28133	35	406	8	1.97044	0.689759	513|515|521|9551|10632|25813|54927|79135	ATP5F1D|ATP5PB|ATP5ME|ATP5MF|ATP5MG|SAMM50|CHCHD3|APOO	-5.49499	0	5	0	0	-13.4015	21.6541
0	0	1	0	0	-7.16947	GO:0009205	M001	1	0	GO Biological Processes	19	purine ribonucleoside triphosphate metabolic process	19_GO:0008152 metabolic process	-7.45926	4.24243	7.31115	28133	343	406	21	5.17241	1.09913	203|318|513|515|521|637|1329|1340|1347|2023|2631|4724|4729|5208|5224|7381|9377|9551|10632|29796|201626	AK1|NUDT2|ATP5F1D|ATP5PB|ATP5ME|BID|COX5B|COX6B1|COX7A2|ENO1|NIPSNAP2|NDUFS4|NDUFV2|PFKFB2|PGAM2|UQCRB|COX5A|ATP5MF|ATP5MG|UQCR10|PDE12	-5.4408	0	5	0	0	-13.4015	21.6541
0	0	1	0	0	-7.07151	GO:0009144	M001	1	0	GO Biological Processes	19	purine nucleoside triphosphate metabolic process	19_GO:0008152 metabolic process	-7.33063	4.1695	7.20971	28133	349	406	21	5.17241	1.09913	203|318|513|515|521|637|1329|1340|1347|2023|2631|4724|4729|5208|5224|7381|9377|9551|10632|29796|201626	AK1|NUDT2|ATP5F1D|ATP5PB|ATP5ME|BID|COX5B|COX6B1|COX7A2|ENO1|NIPSNAP2|NDUFS4|NDUFV2|PFKFB2|PGAM2|UQCRB|COX5A|ATP5MF|ATP5MG|UQCR10|PDE12	-5.33346	0	5	0	0	-13.4015	21.6541
0	0	1	0	0	-7.05538	GO:0009199	M001	1	0	GO Biological Processes	19	ribonucleoside triphosphate metabolic process	19_GO:0008152 metabolic process	-7.30948	4.15759	7.19302	28133	350	406	21	5.17241	1.09913	203|318|513|515|521|637|1329|1340|1347|2023|2631|4724|4729|5208|5224|7381|9377|9551|10632|29796|201626	AK1|NUDT2|ATP5F1D|ATP5PB|ATP5ME|BID|COX5B|COX6B1|COX7A2|ENO1|NIPSNAP2|NDUFS4|NDUFV2|PFKFB2|PGAM2|UQCRB|COX5A|ATP5MF|ATP5MG|UQCR10|PDE12	-5.32294	0	5	0	0	-13.4015	21.6541
0	0	1	0	0	-5.78472	GO:0009165	M001	1	0	GO Biological Processes	19	nucleotide biosynthetic process	19_GO:0008152 metabolic process	-7.27459	3.96992	7.09085	28133	384	406	22	5.41872	1.12354	47|203|318|353|513|515|521|1854|2023|4199|4842|4860|5208|5224|5636|9551|10111|10632|23498|25874|93100|129607	ACLY|AK1|NUDT2|APRT|ATP5F1D|ATP5PB|ATP5ME|DUT|ENO1|ME1|NOS1|PNP|PFKFB2|PGAM2|PRPSAP2|ATP5MF|RAD50|ATP5MG|HAAO|MPC2|NAPRT|CMPK2	-5.29273	0	5	0	0	-13.4015	21.6541
0	0	1	0	0	-7.19956	GO:0009150	M001	1	0	GO Biological Processes	19	purine ribonucleotide metabolic process	19_GO:0008152 metabolic process	-7.26233	3.35289	6.79318	28133	558	406	27	6.65025	1.23655	47|203|318|353|513|515|521|637|1329|1340|1347|2023|2631|4724|4729|5138|5208|5224|7381|9377|9551|10632|25874|29796|30833|55856|201626	ACLY|AK1|NUDT2|APRT|ATP5F1D|ATP5PB|ATP5ME|BID|COX5B|COX6B1|COX7A2|ENO1|NIPSNAP2|NDUFS4|NDUFV2|PDE2A|PFKFB2|PGAM2|UQCRB|COX5A|ATP5MF|ATP5MG|MPC2|UQCR10|NT5C|ACOT13|PDE12	-5.28363	0	5	0	0	-13.4015	21.6541
0	0	1	0	0	-7.13079	GO:0009124	M001	1	0	GO Biological Processes	19	nucleoside monophosphate biosynthetic process	19_GO:0008152 metabolic process	-7.13079	7.58438	8.34463	28133	208	214	12	5.60748	1.5727	203|318|353|513|521|1854|2023|5208|5224|9551|10632|64077	AK1|NUDT2|APRT|ATP5F1D|ATP5ME|DUT|ENO1|PFKFB2|PGAM2|ATP5MF|ATP5MG|LHPP	-4.86179	0	5	0	0	-13.4015	21.6541
0	1	1	0	-3.55041	-4.01203	R-HSA-1852241	M011	2	0	Reactome Gene Sets	6	Organelle biogenesis and maintenance		-7.1258	4.44787	7.21601	28133	296	406	19	4.6798	1.0482	513|515|521|805|1778|5577|6742|9551|10383|10632|10651|11258|22919|25813|54927|79135|84617|84790|203068	ATP5F1D|ATP5PB|ATP5ME|CALM2|DYNC1H1|PRKAR2B|SSBP1|ATP5MF|TUBB4B|ATP5MG|MTX2|DCTN3|MAPRE1|SAMM50|CHCHD3|APOO|TUBB6|TUBA1C|TUBB	-5.17514	0	5	0	0	-13.4015	21.6541
0	0	1	0	0	-6.99707	GO:0009259	M001	1	0	GO Biological Processes	19	ribonucleotide metabolic process	19_GO:0008152 metabolic process	-6.99934	3.25376	6.60739	28133	575	406	27	6.65025	1.23655	47|203|318|353|513|515|521|637|1329|1340|1347|2023|2631|4724|4729|5138|5208|5224|7381|9377|9551|10632|25874|29796|30833|55856|201626	ACLY|AK1|NUDT2|APRT|ATP5F1D|ATP5PB|ATP5ME|BID|COX5B|COX6B1|COX7A2|ENO1|NIPSNAP2|NDUFS4|NDUFV2|PDE2A|PFKFB2|PGAM2|UQCRB|COX5A|ATP5MF|ATP5MG|MPC2|UQCR10|NT5C|ACOT13|PDE12	-5.06857	0	5	0	0	-13.4015	21.6541
0	0	1	0	0	-4.60064	GO:0090407	M001	1	0	GO Biological Processes	19	organophosphate biosynthetic process	19_GO:0008152 metabolic process	-6.94382	2.9997	6.44988	28133	693	406	30	7.38916	1.29827	47|203|318|353|513|515|521|1854|2023|2185|2224|4199|4842|4860|5208|5224|5636|8396|8895|8904|9551|10111|10632|23498|25874|51084|51181|64077|93100|129607	ACLY|AK1|NUDT2|APRT|ATP5F1D|ATP5PB|ATP5ME|DUT|ENO1|PTK2B|FDPS|ME1|NOS1|PNP|PFKFB2|PGAM2|PRPSAP2|PIP4K2B|CPNE3|CPNE1|ATP5MF|RAD50|ATP5MG|HAAO|MPC2|CRYL1|DCXR|LHPP|NAPRT|CMPK2	-5.03362	0	5	0	0	-13.4015	21.6541
0	1	1	0	-3.69416	-4.04883	R-HSA-1592230	M011	2	0	Reactome Gene Sets	6	Mitochondrial biogenesis		-6.88503	8.02341	8.29752	28133	95	406	11	2.70936	0.80576	513|515|521|805|6742|9551|10632|10651|25813|54927|79135	ATP5F1D|ATP5PB|ATP5ME|CALM2|SSBP1|ATP5MF|ATP5MG|MTX2|SAMM50|CHCHD3|APOO	-4.98552	0	5	0	0	-13.4015	21.6541
0	1	1	0	-2.87048	-4.81643	GO:0007006	M011	2	0	GO Biological Processes	19	mitochondrial membrane organization	19_GO:0071840 cellular component organization or biogenesis	-6.73124	6.25563	7.6511	28133	144	406	13	3.20197	0.873733	513|515|521|637|5533|8546|9551|9868|10632|10651|25813|54927|79135	ATP5F1D|ATP5PB|ATP5ME|BID|PPP3CC|AP3B1|ATP5MF|TOMM70|ATP5MG|MTX2|SAMM50|CHCHD3|APOO	-4.86229	0	5	0	0	-13.4015	21.6541
0	0	1	0	0	-6.66727	GO:0009168	M001	1	0	GO Biological Processes	19	purine ribonucleoside monophosphate biosynthetic process	19_GO:0008152 metabolic process	-6.66727	7.7331	8.08785	28133	187	214	11	5.14019	1.50947	203|318|353|513|521|2023|5208|5224|9551|10632|64077	AK1|NUDT2|APRT|ATP5F1D|ATP5ME|ENO1|PFKFB2|PGAM2|ATP5MF|ATP5MG|LHPP	-4.50149	0	5	0	0	-13.4015	21.6541
0	0	1	0	0	-6.64396	GO:0009127	M001	1	0	GO Biological Processes	19	purine nucleoside monophosphate biosynthetic process	19_GO:0008152 metabolic process	-6.64396	7.69196	8.06005	28133	188	214	11	5.14019	1.50947	203|318|353|513|521|2023|5208|5224|9551|10632|64077	AK1|NUDT2|APRT|ATP5F1D|ATP5ME|ENO1|PFKFB2|PGAM2|ATP5MF|ATP5MG|LHPP	-4.48371	0	5	0	0	-13.4015	21.6541
0	0	1	0	0	-6.37494	GO:0009156	M001	1	0	GO Biological Processes	19	ribonucleoside monophosphate biosynthetic process	19_GO:0008152 metabolic process	-6.37494	7.23044	7.74163	28133	200	214	11	5.14019	1.50947	203|318|353|513|521|2023|5208|5224|9551|10632|64077	AK1|NUDT2|APRT|ATP5F1D|ATP5ME|ENO1|PFKFB2|PGAM2|ATP5MF|ATP5MG|LHPP	-4.26889	0	5	0	0	-13.4015	21.6541
0	0	1	0	0	-5.25847	CORUM:563	M001	1	0	CORUM	33	F1F0-ATP synthase, mitochondrial		-5.63075	21.6541	9.99985	28133	16	406	5	1.23153	0.547354	513|515|521|9551|10632	ATP5F1D|ATP5PB|ATP5ME|ATP5MF|ATP5MG	-3.91786	0	5	0	0	-13.4015	21.6541
0	0	1	0	0	-5.03801	R-HSA-163210	M001	1	0	Reactome Gene Sets	6	Formation of ATP by chemiosmotic coupling		-5.3485	19.2481	9.37123	28133	18	406	5	1.23153	0.547354	513|515|521|9551|10632	ATP5F1D|ATP5PB|ATP5ME|ATP5MF|ATP5MG	-3.68068	0	5	0	0	-13.4015	21.6541
0	0	1	0	0	-5.22775	GO:0072522	M001	1	0	GO Biological Processes	19	purine-containing compound biosynthetic process	19_GO:0008152 metabolic process	-5.22775	5.0081	6.26308	28133	315	214	12	5.60748	1.5727	203|318|353|513|521|2023|4860|5208|5224|9551|10632|25874	AK1|NUDT2|APRT|ATP5F1D|ATP5ME|ENO1|PNP|PFKFB2|PGAM2|ATP5MF|ATP5MG|MPC2	-3.41662	0	5	0	0	-13.4015	21.6541
0	0	1	0	0	-4.93308	GO:0009152	M001	1	0	GO Biological Processes	19	purine ribonucleotide biosynthetic process	19_GO:0008152 metabolic process	-4.93308	5.12797	6.09956	28133	282	214	11	5.14019	1.50947	203|318|353|513|521|2023|5208|5224|9551|10632|25874	AK1|NUDT2|APRT|ATP5F1D|ATP5ME|ENO1|PFKFB2|PGAM2|ATP5MF|ATP5MG|MPC2	-3.20966	0	5	0	0	-13.4015	21.6541
0	0	1	0	0	-4.66989	GO:0042776	M001	1	0	GO Biological Processes	19	mitochondrial ATP synthesis coupled proton transport	19_GO:0051179 localization	-4.88153	15.7484	8.37396	28133	22	406	5	1.23153	0.547354	513|515|521|9551|10632	ATP5F1D|ATP5PB|ATP5ME|ATP5MF|ATP5MG	-3.27003	0	5	0	0	-13.4015	21.6541
0	0	1	0	0	-4.77466	GO:0009142	M001	1	0	GO Biological Processes	19	nucleoside triphosphate biosynthetic process	19_GO:0008152 metabolic process	-4.77466	6.19457	6.3066	28133	191	214	9	4.20561	1.37207	203|318|513|521|2023|5208|5224|9551|10632	AK1|NUDT2|ATP5F1D|ATP5ME|ENO1|PFKFB2|PGAM2|ATP5MF|ATP5MG	-3.09518	0	5	0	0	-13.4015	21.6541
0	0	1	0	0	-4.75122	GO:0009260	M001	1	0	GO Biological Processes	19	ribonucleotide biosynthetic process	19_GO:0008152 metabolic process	-4.75122	4.902	5.89842	28133	295	214	11	5.14019	1.50947	203|318|353|513|521|2023|5208|5224|9551|10632|25874	AK1|NUDT2|APRT|ATP5F1D|ATP5ME|ENO1|PFKFB2|PGAM2|ATP5MF|ATP5MG|MPC2	-3.08073	0	5	0	0	-13.4015	21.6541
0	0	1	0	0	-4.65732	GO:0046390	M001	1	0	GO Biological Processes	19	ribose phosphate biosynthetic process	19_GO:0008152 metabolic process	-4.65732	4.78837	5.79494	28133	302	214	11	5.14019	1.50947	203|318|353|513|521|2023|5208|5224|9551|10632|25874	AK1|NUDT2|APRT|ATP5F1D|ATP5ME|ENO1|PFKFB2|PGAM2|ATP5MF|ATP5MG|MPC2	-3.01692	0	5	0	0	-13.4015	21.6541
0	0	1	0	0	-4.63099	GO:0006164	M001	1	0	GO Biological Processes	19	purine nucleotide biosynthetic process	19_GO:0008152 metabolic process	-4.63099	4.75687	5.76596	28133	304	214	11	5.14019	1.50947	203|318|353|513|521|2023|5208|5224|9551|10632|25874	AK1|NUDT2|APRT|ATP5F1D|ATP5ME|ENO1|PFKFB2|PGAM2|ATP5MF|ATP5MG|MPC2	-3.00137	0	5	0	0	-13.4015	21.6541
0	0	1	0	0	-4.02473	WP623	M001	1	0	WikiPathways	27	Oxidative phosphorylation		-4.60645	8.0842	6.64712	28133	60	406	7	1.72414	0.646021	513|515|521|4724|4729|9551|10632	ATP5F1D|ATP5PB|ATP5ME|NDUFS4|NDUFV2|ATP5MF|ATP5MG	-3.03287	0	5	0	0	-13.4015	21.6541
0	0	1	0	0	-4.4291	GO:0006754	M001	1	0	GO Biological Processes	19	ATP biosynthetic process	19_GO:0008152 metabolic process	-4.4291	6.45215	6.11185	28133	163	214	8	3.73832	1.29676	318|513|521|2023|5208|5224|9551|10632	NUDT2|ATP5F1D|ATP5ME|ENO1|PFKFB2|PGAM2|ATP5MF|ATP5MG	-2.86816	0	5	0	0	-13.4015	21.6541
0	0	1	0	0	-4.30277	GO:0015985	M001	1	0	GO Biological Processes	19	energy coupled proton transport, down electrochemical gradient	19_GO:0051179 localization	-4.4208	12.8321	7.44311	28133	27	406	5	1.23153	0.547354	513|515|521|9551|10632	ATP5F1D|ATP5PB|ATP5ME|ATP5MF|ATP5MG	-2.87146	0	5	0	0	-13.4015	21.6541
0	0	1	0	0	-4.30277	GO:0015986	M001	1	0	GO Biological Processes	19	ATP synthesis coupled proton transport	19_GO:0051179 localization	-4.4208	12.8321	7.44311	28133	27	406	5	1.23153	0.547354	513|515|521|9551|10632	ATP5F1D|ATP5PB|ATP5ME|ATP5MF|ATP5MG	-2.87146	0	5	0	0	-13.4015	21.6541
0	0	1	0	0	-4.22826	GO:0009206	M001	1	0	GO Biological Processes	19	purine ribonucleoside triphosphate biosynthetic process	19_GO:0008152 metabolic process	-4.22826	6.04426	5.84344	28133	174	214	8	3.73832	1.29676	318|513|521|2023|5208|5224|9551|10632	NUDT2|ATP5F1D|ATP5ME|ENO1|PFKFB2|PGAM2|ATP5MF|ATP5MG	-2.73072	0	5	0	0	-13.4015	21.6541
0	0	1	0	0	-4.21075	GO:0009145	M001	1	0	GO Biological Processes	19	purine nucleoside triphosphate biosynthetic process	19_GO:0008152 metabolic process	-4.21075	6.00972	5.82018	28133	175	214	8	3.73832	1.29676	318|513|521|2023|5208|5224|9551|10632	NUDT2|ATP5F1D|ATP5ME|ENO1|PFKFB2|PGAM2|ATP5MF|ATP5MG	-2.71813	0	5	0	0	-13.4015	21.6541
0	0	1	0	0	-4.12493	GO:0009201	M001	1	0	GO Biological Processes	19	ribonucleoside triphosphate biosynthetic process	19_GO:0008152 metabolic process	-4.12493	5.84278	5.70656	28133	180	214	8	3.73832	1.29676	318|513|521|2023|5208|5224|9551|10632	NUDT2|ATP5F1D|ATP5ME|ENO1|PFKFB2|PGAM2|ATP5MF|ATP5MG	-2.65545	0	5	0	0	-13.4015	21.6541
0	0	1	0	0	-3.94986	GO:1901137	M001	1	0	GO Biological Processes	19	carbohydrate derivative biosynthetic process	19_GO:0008152 metabolic process	-3.94986	2.85423	4.60706	28133	783	214	17	7.94393	1.84857	176|203|318|353|513|521|1854|2023|2817|4969|5208|5224|9551|10632|25874|51084|375790	ACAN|AK1|NUDT2|APRT|ATP5F1D|ATP5ME|DUT|ENO1|GPC1|OGN|PFKFB2|PGAM2|ATP5MF|ATP5MG|MPC2|CRYL1|AGRN	-2.5219	0	5	0	0	-13.4015	21.6541
1	1	1	-2.3969	-7.01706	-9.00147	GO:0120035	M111	3	0	GO Biological Processes	19	regulation of plasma membrane bounded cell projection organization	19_GO:0071840 cellular component organization or biogenesis	-13.3817	4.04128	9.88172	28133	703	406	41	10.0985	1.49537	102|348|952|960|1000|1020|1627|2039|2185|2596|4035|4134|4137|4974|5064|5217|5361|5879|5898|5962|6616|6714|7070|7143|7430|8499|8826|9456|9693|10096|10787|23043|23111|23499|23654|55737|57118|65009|112755|257194|375790	ADAM10|APOE|CD38|CD44|CDH2|CDK5|DBN1|DMTN|PTK2B|GAP43|LRP1|MAP4|MAPT|OMG|PALM|PFN2|PLXNA1|RAC1|RALA|RDX|SNAP25|SRC|THY1|TNR|EZR|PPFIA2|IQGAP1|HOMER1|RAPGEF2|ACTR3|NCKAP1|TNIK|SPART|MACF1|PLXNB2|VPS35|CAMK1D|NDRG4|STX1B|NEGR1|AGRN	-10.4541	0	6	1	1	-13.3817	7.10698
1	1	1	-2.36114	-6.93512	-8.89249	GO:0031344	M111	3	0	GO Biological Processes	19	regulation of cell projection organization	19_GO:0071840 cellular component organization or biogenesis	-13.1992	3.99019	9.77934	28133	712	406	41	10.0985	1.49537	102|348|952|960|1000|1020|1627|2039|2185|2596|4035|4134|4137|4974|5064|5217|5361|5879|5898|5962|6616|6714|7070|7143|7430|8499|8826|9456|9693|10096|10787|23043|23111|23499|23654|55737|57118|65009|112755|257194|375790	ADAM10|APOE|CD38|CD44|CDH2|CDK5|DBN1|DMTN|PTK2B|GAP43|LRP1|MAP4|MAPT|OMG|PALM|PFN2|PLXNA1|RAC1|RALA|RDX|SNAP25|SRC|THY1|TNR|EZR|PPFIA2|IQGAP1|HOMER1|RAPGEF2|ACTR3|NCKAP1|TNIK|SPART|MACF1|PLXNB2|VPS35|CAMK1D|NDRG4|STX1B|NEGR1|AGRN	-10.3027	0	6	0	0	-13.3817	7.10698
0	1	1	0	-5.40194	-5.95113	GO:0022604	M011	2	0	GO Biological Processes	19	regulation of cell morphogenesis	19_GO:0032502 developmental process	-9.82373	4.13477	8.43553	28133	486	406	29	7.14286	1.27815	102|348|960|1000|1020|1627|2039|2185|2244|4035|4137|4974|5064|5361|5591|5879|5962|6284|6714|7070|7143|7430|8499|9693|23043|23111|23499|23654|79784	ADAM10|APOE|CD44|CDH2|CDK5|DBN1|DMTN|PTK2B|FGB|LRP1|MAPT|OMG|PALM|PLXNA1|PRKDC|RAC1|RDX|S100A13|SRC|THY1|TNR|EZR|PPFIA2|RAPGEF2|TNIK|SPART|MACF1|PLXNB2|MYH14	-7.23567	0	6	0	0	-13.3817	7.10698
0	1	1	0	-4.27579	-6.24047	GO:0010769	M011	2	0	GO Biological Processes	19	regulation of cell morphogenesis involved in differentiation	19_GO:0032502 developmental process	-8.4749	4.85052	8.11356	28133	300	406	21	5.17241	1.09913	102|348|1000|1020|1627|2039|2244|4035|4137|4974|5361|5591|5879|7070|7143|8499|9693|23043|23111|23499|23654	ADAM10|APOE|CDH2|CDK5|DBN1|DMTN|FGB|LRP1|MAPT|OMG|PLXNA1|PRKDC|RAC1|THY1|TNR|PPFIA2|RAPGEF2|TNIK|SPART|MACF1|PLXNB2	-6.21657	0	6	0	0	-13.3817	7.10698
1	1	1	-2.18094	-3.27792	-5.15697	GO:0010975	M111	3	0	GO Biological Processes	19	regulation of neuron projection development	19_GO:0032502 developmental process	-7.08477	3.48557	6.76516	28133	497	406	25	6.15764	1.19301	102|348|952|1000|1020|1627|2185|4035|4137|4974|5361|6616|7070|7143|8499|8826|9693|23043|23111|23499|23654|57118|65009|112755|257194	ADAM10|APOE|CD38|CDH2|CDK5|DBN1|PTK2B|LRP1|MAPT|OMG|PLXNA1|SNAP25|THY1|TNR|PPFIA2|IQGAP1|RAPGEF2|TNIK|SPART|MACF1|PLXNB2|CAMK1D|NDRG4|STX1B|NEGR1	-5.13917	0	6	0	0	-13.3817	7.10698
1	1	1	-3.3021	-4.37127	-4.21796	GO:0060560	M111	3	0	GO Biological Processes	19	developmental growth involved in morphogenesis	19_GO:0040007 growth	-6.69262	4.92751	7.15741	28133	225	406	16	3.94089	0.965613	214|348|1020|1627|3371|4035|4137|5361|7143|8239|8826|8904|9201|10155|23111|23499	ALCAM|APOE|CDK5|DBN1|TNC|LRP1|MAPT|PLXNA1|TNR|USP9X|IQGAP1|CPNE1|DCLK1|TRIM28|SPART|MACF1	-4.83477	0	6	0	0	-13.3817	7.10698
1	1	1	-2.91686	-4.10107	-4.12646	GO:0016049	M111	3	0	GO Biological Processes	19	cell growth	19_GO:0040007 growth	-6.30701	3.36943	6.2887	28133	473	406	23	5.66502	1.14729	102|214|348|952|1020|1627|2023|2185|2786|3020|4035|4137|5300|5361|5716|7143|8239|8826|8904|9201|10591|23111|23499	ADAM10|ALCAM|APOE|CD38|CDK5|DBN1|ENO1|PTK2B|GNG4|H3-3A|LRP1|MAPT|PIN1|PLXNA1|PSMD10|TNR|USP9X|IQGAP1|CPNE1|DCLK1|DNPH1|SPART|MACF1	-4.49093	0	6	0	0	-13.3817	7.10698
1	0	1	-2.27184	0	-6.21443	GO:0045927	M101	2	0	GO Biological Processes	19	positive regulation of growth	19_GO:0040007 growth	-6.21443	6.23538	7.32351	28133	253	214	12	5.60748	1.5727	102|2185|4035|4137|5591|5716|7430|9647|10409|10591|23499|375790	ADAM10|PTK2B|LRP1|MAPT|PRKDC|PSMD10|EZR|PPM1F|BASP1|DNPH1|MACF1|AGRN	-4.14556	0	6	0	0	-13.3817	7.10698
1	1	1	-2.21643	-3.47008	-4.4102	GO:1990138	M111	3	0	GO Biological Processes	19	neuron projection extension	19_GO:0040007 growth	-6.0794	5.49275	6.98244	28133	164	406	13	3.20197	0.873733	214|348|1020|1627|4035|4137|5361|7143|8239|8826|8904|9201|23499	ALCAM|APOE|CDK5|DBN1|LRP1|MAPT|PLXNA1|TNR|USP9X|IQGAP1|CPNE1|DCLK1|MACF1	-4.30028	0	6	0	0	-13.3817	7.10698
1	1	1	-2.15243	-2.83013	-3.74671	GO:0031346	M111	3	0	GO Biological Processes	19	positive regulation of cell projection organization	19_GO:0048518 positive regulation of biological process	-6.05095	3.62791	6.2577	28133	382	406	20	4.92611	1.07404	348|1627|2185|4035|4137|5064|5361|5879|5898|6714|8826|9693|10096|10787|23499|23654|57118|65009|257194|375790	APOE|DBN1|PTK2B|LRP1|MAPT|PALM|PLXNA1|RAC1|RALA|SRC|IQGAP1|RAPGEF2|ACTR3|NCKAP1|MACF1|PLXNB2|CAMK1D|NDRG4|NEGR1|AGRN	-4.27411	0	6	0	0	-13.3817	7.10698
1	1	1	-3.44701	-5.74983	-4.17161	GO:0048589	M111	3	0	GO Biological Processes	19	developmental growth	19_GO:0040007 growth	-6.03143	2.97789	5.95118	28133	605	406	26	6.40394	1.21504	214|348|1020|1627|2596|2934|3020|3371|4035|4137|5300|5361|5591|6647|7143|7430|8239|8826|8904|9201|10155|10409|23111|23499|65009|375790	ALCAM|APOE|CDK5|DBN1|GAP43|GSN|H3-3A|TNC|LRP1|MAPT|PIN1|PLXNA1|PRKDC|SOD1|TNR|EZR|USP9X|IQGAP1|CPNE1|DCLK1|TRIM28|BASP1|SPART|MACF1|NDRG4|AGRN	-4.25804	0	6	0	0	-13.3817	7.10698
1	1	1	-3.33283	-4.41251	-3.50093	GO:0048588	M111	3	0	GO Biological Processes	19	developmental cell growth	19_GO:0040007 growth	-6.03035	4.68197	6.6647	28133	222	406	15	3.69458	0.936149	214|348|1020|1627|4035|4137|5300|5361|7143|8239|8826|8904|9201|23111|23499	ALCAM|APOE|CDK5|DBN1|LRP1|MAPT|PIN1|PLXNA1|TNR|USP9X|IQGAP1|CPNE1|DCLK1|SPART|MACF1	-4.25804	0	6	0	0	-13.3817	7.10698
0	1	1	0	-2.52316	-3.42657	GO:0050770	M011	2	0	GO Biological Processes	19	regulation of axonogenesis	19_GO:0032502 developmental process	-5.81717	5.207	6.71643	28133	173	406	13	3.20197	0.873733	348|1000|1020|1627|4035|4137|4974|5361|7070|7143|23111|23499|23654	APOE|CDH2|CDK5|DBN1|LRP1|MAPT|OMG|PLXNA1|THY1|TNR|SPART|MACF1|PLXNB2	-4.06465	0	6	0	0	-13.3817	7.10698
0	1	1	0	-4.22394	-3.41151	GO:0008361	M011	2	0	GO Biological Processes	19	regulation of cell size	19_GO:0071840 cellular component organization or biogenesis	-5.78908	5.17707	6.68802	28133	174	406	13	3.20197	0.873733	348|358|1020|1627|4035|4137|5879|5962|7143|7430|23111|23499|51520	APOE|AQP1|CDK5|DBN1|LRP1|MAPT|RAC1|RDX|TNR|EZR|SPART|MACF1|LARS1	-4.04613	0	6	0	0	-13.3817	7.10698
1	1	1	-2.10298	-2.96273	-3.86538	GO:0045664	M111	3	0	GO Biological Processes	19	regulation of neuron differentiation	19_GO:0032502 developmental process	-5.52254	2.79321	5.57508	28133	645	406	26	6.40394	1.21504	102|348|952|1000|1020|1627|2185|4035|4137|4974|5361|6616|7070|7143|8499|8826|8904|9693|23043|23111|23499|23654|57118|65009|112755|257194	ADAM10|APOE|CD38|CDH2|CDK5|DBN1|PTK2B|LRP1|MAPT|OMG|PLXNA1|SNAP25|THY1|TNR|PPFIA2|IQGAP1|CPNE1|RAPGEF2|TNIK|SPART|MACF1|PLXNB2|CAMK1D|NDRG4|STX1B|NEGR1	-3.82921	0	6	0	0	-13.3817	7.10698
0	1	1	0	-3.3275	-3.61379	GO:0048675	M011	2	0	GO Biological Processes	19	axon extension	19_GO:0040007 growth	-5.20124	6.07834	6.57446	28133	114	406	10	2.46305	0.769234	214|348|1020|1627|4035|4137|7143|8239|9201|23499	ALCAM|APOE|CDK5|DBN1|LRP1|MAPT|TNR|USP9X|DCLK1|MACF1	-3.54905	0	6	0	0	-13.3817	7.10698
0	1	1	0	-2.9466	-4.972	GO:0040008	M011	2	0	GO Biological Processes	19	regulation of growth	19_GO:0040007 growth	-5.00526	2.67335	5.21479	28133	648	406	25	6.15764	1.19301	102|348|952|1020|1627|2023|2185|2596|2786|3020|4035|4137|5300|5591|5716|6647|7143|7430|9647|10409|10591|23111|23499|220296|375790	ADAM10|APOE|CD38|CDK5|DBN1|ENO1|PTK2B|GAP43|GNG4|H3-3A|LRP1|MAPT|PIN1|PRKDC|PSMD10|SOD1|TNR|EZR|PPM1F|BASP1|DNPH1|SPART|MACF1|HEPACAM|AGRN	-3.38035	0	6	0	0	-13.3817	7.10698
1	0	1	-2.24443	0	-3.61592	GO:0030307	M101	2	0	GO Biological Processes	19	positive regulation of cell growth	19_GO:0040007 growth	-4.62379	4.73431	5.75008	28133	161	406	11	2.70936	0.80576	102|952|1627|2185|3020|4035|4137|5300|5716|10591|23499	ADAM10|CD38|DBN1|PTK2B|H3-3A|LRP1|MAPT|PIN1|PSMD10|DNPH1|MACF1	-3.04664	0	6	0	0	-13.3817	7.10698
0	0	1	0	0	-3.78701	GO:0010770	M001	1	0	GO Biological Processes	19	positive regulation of cell morphogenesis involved in differentiation	19_GO:0048518 positive regulation of biological process	-4.14109	4.58895	5.35092	28133	151	406	10	2.46305	0.769234	1627|2039|2244|4035|4137|5361|5591|5879|23499|23654	DBN1|DMTN|FGB|LRP1|MAPT|PLXNA1|PRKDC|RAC1|MACF1|PLXNB2	-2.63588	0	6	0	0	-13.3817	7.10698
0	1	1	0	-2.64559	-2.36837	GO:0001558	M011	2	0	GO Biological Processes	19	regulation of cell growth	19_GO:0040007 growth	-3.96734	2.88015	4.63488	28133	409	406	17	4.18719	0.994055	102|348|952|1020|1627|2023|2185|2786|3020|4035|4137|5300|5716|7143|10591|23111|23499	ADAM10|APOE|CD38|CDK5|DBN1|ENO1|PTK2B|GNG4|H3-3A|LRP1|MAPT|PIN1|PSMD10|TNR|DNPH1|SPART|MACF1	-2.48925	0	6	0	0	-13.3817	7.10698
0	1	1	0	-2.54529	-2.08193	GO:0061387	M011	2	0	GO Biological Processes	19	regulation of extent of cell growth	19_GO:0040007 growth	-3.86858	5.33024	5.35348	28133	104	406	8	1.97044	0.689759	348|1020|1627|4035|4137|7143|23111|23499	APOE|CDK5|DBN1|LRP1|MAPT|TNR|SPART|MACF1	-2.40399	0	6	0	0	-13.3817	7.10698
0	0	1	0	0	-2.86457	GO:0010976	M001	1	0	GO Biological Processes	19	positive regulation of neuron projection development	19_GO:0048518 positive regulation of biological process	-3.65171	3.24032	4.54249	28133	278	406	13	3.20197	0.873733	348|1627|2185|4035|4137|5361|8826|9693|23499|23654|57118|65009|257194	APOE|DBN1|PTK2B|LRP1|MAPT|PLXNA1|IQGAP1|RAPGEF2|MACF1|PLXNB2|CAMK1D|NDRG4|NEGR1	-2.22375	0	6	0	0	-13.3817	7.10698
0	1	1	0	-2.62703	-3.06943	GO:0048638	M011	2	0	GO Biological Processes	19	regulation of developmental growth	19_GO:0040007 growth	-3.56351	3.01274	4.39562	28133	322	406	14	3.44828	0.905562	348|1020|1627|4035|4137|5300|5591|6647|7143|7430|10409|23111|23499|375790	APOE|CDK5|DBN1|LRP1|MAPT|PIN1|PRKDC|SOD1|TNR|EZR|BASP1|SPART|MACF1|AGRN	-2.1481	0	6	0	0	-13.3817	7.10698
0	0	1	0	0	-3.4724	GO:0048639	M001	1	0	GO Biological Processes	19	positive regulation of developmental growth	19_GO:0040007 growth	-3.4724	5.41317	5.05289	28133	170	214	7	3.27103	1.21594	4035|4137|5591|7430|10409|23499|375790	LRP1|MAPT|PRKDC|EZR|BASP1|MACF1|AGRN	-2.17344	0	6	0	0	-13.3817	7.10698
0	0	1	0	0	-2.26774	GO:0030516	M001	1	0	GO Biological Processes	19	regulation of axon extension	19_GO:0040007 growth	-3.42211	5.2723	4.96673	28133	92	406	7	1.72414	0.646021	348|1020|1627|4035|4137|7143|23499	APOE|CDK5|DBN1|LRP1|MAPT|TNR|MACF1	-2.02841	0	6	0	0	-13.3817	7.10698
0	0	1	0	0	-2.48234	GO:0010720	M001	1	0	GO Biological Processes	19	positive regulation of cell development	19_GO:0048518 positive regulation of biological process	-3.36827	2.40689	4.02088	28133	547	406	19	4.6798	1.0482	348|1627|2039|2185|2244|4035|4137|5300|5361|5591|5879|8826|8904|9693|23499|23654|57118|65009|257194	APOE|DBN1|DMTN|PTK2B|FGB|LRP1|MAPT|PIN1|PLXNA1|PRKDC|RAC1|IQGAP1|CPNE1|RAPGEF2|MACF1|PLXNB2|CAMK1D|NDRG4|NEGR1	-1.9825	0	6	0	0	-13.3817	7.10698
0	0	1	0	0	-2.14955	GO:0045666	M001	1	0	GO Biological Processes	19	positive regulation of neuron differentiation	19_GO:0048518 positive regulation of biological process	-3.02747	2.65782	3.85765	28133	365	406	14	3.44828	0.905562	348|1627|2185|4035|4137|5361|8826|8904|9693|23499|23654|57118|65009|257194	APOE|DBN1|PTK2B|LRP1|MAPT|PLXNA1|IQGAP1|CPNE1|RAPGEF2|MACF1|PLXNB2|CAMK1D|NDRG4|NEGR1	-1.69599	0	6	0	0	-13.3817	7.10698
0	0	1	0	0	-2.504	GO:0050772	M001	1	0	GO Biological Processes	19	positive regulation of axonogenesis	19_GO:0048518 positive regulation of biological process	-3.00147	5.26277	4.59113	28133	79	406	6	1.47783	0.598848	1627|4035|4137|5361|23499|23654	DBN1|LRP1|MAPT|PLXNA1|MACF1|PLXNB2	-1.67478	0	6	0	0	-13.3817	7.10698
0	0	1	0	0	-2.48923	GO:0045773	M001	1	0	GO Biological Processes	19	positive regulation of axon extension	19_GO:0040007 growth	-2.62736	7.10698	4.61811	28133	39	406	4	0.985222	0.490178	1627|4035|4137|23499	DBN1|LRP1|MAPT|MACF1	-1.35128	0	6	0	0	-13.3817	7.10698
0	1	1	0	-5.65393	-10.9909	GO:0034332	M011	2	0	GO Biological Processes	19	adherens junction organization	19_GO:0071840 cellular component organization or biogenesis	-13.2006	9.23908	12.243	28133	150	406	20	4.92611	1.07404	88|102|1000|1012|2039|2185|3728|4035|5786|5879|5962|6714|7070|7082|8826|9647|23122|23499|23705|57863	ACTN2|ADAM10|CDH2|CDH13|DMTN|PTK2B|JUP|LRP1|PTPRA|RAC1|RDX|SRC|THY1|TJP1|IQGAP1|PPM1F|CLASP2|MACF1|CADM1|CADM3	-10.3027	0	7	1	1	-13.2006	21.034
0	1	1	0	-4.88091	-8.48983	GO:0034330	M011	2	0	GO Biological Processes	19	cell junction organization	19_GO:0071840 cellular component organization or biogenesis	-11.9035	5.68335	10.1473	28133	317	406	26	6.40394	1.21504	88|102|829|1000|1012|2039|2185|2318|3691|3728|4035|5339|5786|5879|5962|6714|7070|7082|8826|9647|9693|10211|23122|23499|23705|57863	ACTN2|ADAM10|CAPZA1|CDH2|CDH13|DMTN|PTK2B|FLNC|ITGB4|JUP|LRP1|PLEC|PTPRA|RAC1|RDX|SRC|THY1|TJP1|IQGAP1|PPM1F|RAPGEF2|FLOT1|CLASP2|MACF1|CADM1|CADM3	-9.10087	0	7	0	0	-13.2006	21.034
1	1	1	-3.24204	-4.29069	-8.50269	GO:0007160	M111	3	0	GO Biological Processes	19	cell-matrix adhesion	19_GO:0022610 biological adhesion	-11.4376	6.59934	10.3404	28133	231	406	22	5.41872	1.12354	88|960|1012|1020|2039|2185|2244|3691|3696|3728|4035|5786|5879|6714|7070|7264|7402|8499|8826|9647|23122|23499	ACTN2|CD44|CDH13|CDK5|DMTN|PTK2B|FGB|ITGB4|ITGB8|JUP|LRP1|PTPRA|RAC1|SRC|THY1|GFUS|UTRN|PPFIA2|IQGAP1|PPM1F|CLASP2|MACF1	-8.68127	0	7	0	0	-13.2006	21.034
1	0	1	-2.99262	0	-9.52475	GO:0007044	M101	2	0	GO Biological Processes	19	cell-substrate junction assembly	19_GO:0071840 cellular component organization or biogenesis	-9.70996	9.70103	10.5475	28133	100	406	14	3.44828	0.905562	88|2039|2185|3691|4035|5339|5786|5879|6714|7070|8826|9647|23122|23499	ACTN2|DMTN|PTK2B|ITGB4|LRP1|PLEC|PTPRA|RAC1|SRC|THY1|IQGAP1|PPM1F|CLASP2|MACF1	-7.13639	0	7	0	0	-13.2006	21.034
1	1	1	-2.22955	-3.94469	-6.10686	GO:0034329	M111	3	0	GO Biological Processes	19	cell junction assembly	19_GO:0071840 cellular component organization or biogenesis	-9.63137	5.61836	9.03545	28133	259	406	21	5.17241	1.09913	88|829|1000|2039|2185|2318|3691|3728|4035|5339|5786|5879|6714|7070|7082|8826|9647|9693|10211|23122|23499	ACTN2|CAPZA1|CDH2|DMTN|PTK2B|FLNC|ITGB4|JUP|LRP1|PLEC|PTPRA|RAC1|SRC|THY1|TJP1|IQGAP1|PPM1F|RAPGEF2|FLOT1|CLASP2|MACF1	-7.08367	0	7	0	0	-13.2006	21.034
1	1	1	-2.63629	-3.14547	-8.47969	GO:0001952	M111	3	0	GO Biological Processes	19	regulation of cell-matrix adhesion	19_GO:0022610 biological adhesion	-9.3912	8.31517	9.9186	28133	125	406	15	3.69458	0.936149	1012|2039|2185|3728|4035|5786|5879|6714|7070|7264|7402|8826|9647|23122|23499	CDH13|DMTN|PTK2B|JUP|LRP1|PTPRA|RAC1|SRC|THY1|GFUS|UTRN|IQGAP1|PPM1F|CLASP2|MACF1	-6.90153	0	7	0	0	-13.2006	21.034
1	1	1	-2.27434	-3.67793	-6.89709	GO:0031589	M111	3	0	GO Biological Processes	19	cell-substrate adhesion	19_GO:0022610 biological adhesion	-9.17489	4.61954	8.36383	28133	360	406	24	5.91133	1.17044	88|960|1012|1020|2039|2185|2244|3691|3696|3728|4035|5786|5879|6251|6714|7070|7264|7402|7450|8499|8826|9647|23122|23499	ACTN2|CD44|CDH13|CDK5|DMTN|PTK2B|FGB|ITGB4|ITGB8|JUP|LRP1|PTPRA|RAC1|RSU1|SRC|THY1|GFUS|UTRN|VWF|PPFIA2|IQGAP1|PPM1F|CLASP2|MACF1	-6.77023	0	7	0	0	-13.2006	21.034
1	0	1	-2.19747	0	-8.99992	GO:0007045	M101	2	0	GO Biological Processes	19	cell-substrate adherens junction assembly	19_GO:0071840 cellular component organization or biogenesis	-8.99992	15.4662	11.6942	28133	85	214	10	4.6729	1.44276	88|2039|2185|4035|5879|6714|7070|8826|9647|23499	ACTN2|DMTN|PTK2B|LRP1|RAC1|SRC|THY1|IQGAP1|PPM1F|MACF1	-6.26426	0	7	0	0	-13.2006	21.034
1	0	1	-2.19747	0	-8.99992	GO:0048041	M101	2	0	GO Biological Processes	19	focal adhesion assembly	19_GO:0022610 biological adhesion	-8.99992	15.4662	11.6942	28133	85	214	10	4.6729	1.44276	88|2039|2185|4035|5879|6714|7070|8826|9647|23499	ACTN2|DMTN|PTK2B|LRP1|RAC1|SRC|THY1|IQGAP1|PPM1F|MACF1	-6.26426	0	7	0	0	-13.2006	21.034
1	1	1	-2.99262	-2.60695	-7.12314	GO:1901888	M111	3	0	GO Biological Processes	19	regulation of cell junction assembly	19_GO:0071840 cellular component organization or biogenesis	-8.65291	9.0081	9.70749	28133	100	406	13	3.20197	0.873733	2039|4035|5786|5879|6714|7070|7082|8826|9647|9693|10211|23122|23499	DMTN|LRP1|PTPRA|RAC1|SRC|THY1|TJP1|IQGAP1|PPM1F|RAPGEF2|FLOT1|CLASP2|MACF1	-6.3354	0	7	0	0	-13.2006	21.034
1	0	1	-2.05229	0	-8.47458	GO:0034333	M101	2	0	GO Biological Processes	19	adherens junction assembly	19_GO:0071840 cellular component organization or biogenesis	-8.47458	13.694	10.9075	28133	96	214	10	4.6729	1.44276	88|2039|2185|4035|5879|6714|7070|8826|9647|23499	ACTN2|DMTN|PTK2B|LRP1|RAC1|SRC|THY1|IQGAP1|PPM1F|MACF1	-5.84807	0	7	0	0	-13.2006	21.034
1	1	1	-2.39858	-3.13537	-7.11068	GO:1903391	M111	3	0	GO Biological Processes	19	regulation of adherens junction organization	19_GO:0071840 cellular component organization or biogenesis	-8.16842	10.5864	9.85563	28133	72	406	11	2.70936	0.80576	2039|4035|5786|5879|5962|6714|7070|8826|9647|23122|23499	DMTN|LRP1|PTPRA|RAC1|RDX|SRC|THY1|IQGAP1|PPM1F|CLASP2|MACF1	-5.99153	0	7	0	0	-13.2006	21.034
1	1	1	-2.54527	-3.61689	-6.00475	GO:0010810	M111	3	0	GO Biological Processes	19	regulation of cell-substrate adhesion	19_GO:0022610 biological adhesion	-7.65932	5.40359	7.8982	28133	218	406	17	4.18719	0.994055	1012|2039|2185|2244|3728|4035|5786|5879|6251|6714|7070|7264|7402|8826|9647|23122|23499	CDH13|DMTN|PTK2B|FGB|JUP|LRP1|PTPRA|RAC1|RSU1|SRC|THY1|GFUS|UTRN|IQGAP1|PPM1F|CLASP2|MACF1	-5.58597	0	7	0	0	-13.2006	21.034
1	1	1	-2.54327	-2.24903	-7.52009	GO:0051893	M111	3	0	GO Biological Processes	19	regulation of focal adhesion assembly	19_GO:0022610 biological adhesion	-7.57589	10.827	9.52383	28133	64	406	10	2.46305	0.769234	2039|4035|5786|5879|6714|7070|8826|9647|23122|23499	DMTN|LRP1|PTPRA|RAC1|SRC|THY1|IQGAP1|PPM1F|CLASP2|MACF1	-5.52448	0	7	0	0	-13.2006	21.034
1	1	1	-2.54327	-2.24903	-7.52009	GO:0090109	M111	3	0	GO Biological Processes	19	regulation of cell-substrate junction assembly	19_GO:0071840 cellular component organization or biogenesis	-7.57589	10.827	9.52383	28133	64	406	10	2.46305	0.769234	2039|4035|5786|5879|6714|7070|8826|9647|23122|23499	DMTN|LRP1|PTPRA|RAC1|SRC|THY1|IQGAP1|PPM1F|CLASP2|MACF1	-5.52448	0	7	0	0	-13.2006	21.034
0	1	1	0	-2.45654	-6.75778	GO:0001954	M011	2	0	GO Biological Processes	19	positive regulation of cell-matrix adhesion	19_GO:0022610 biological adhesion	-7.12801	11.5489	9.38908	28133	54	406	9	2.21675	0.73068	1012|2185|3728|5879|7070|7264|7402|8826|9647	CDH13|PTK2B|JUP|RAC1|THY1|GFUS|UTRN|IQGAP1|PPM1F	-5.17537	0	7	0	0	-13.2006	21.034
0	1	1	0	-3.20948	-5.37295	GO:0010811	M011	2	0	GO Biological Processes	19	positive regulation of cell-substrate adhesion	19_GO:0022610 biological adhesion	-6.70476	6.87204	7.83289	28133	121	406	12	2.95567	0.840523	1012|2039|2185|2244|3728|5879|6251|7070|7264|7402|8826|9647	CDH13|DMTN|PTK2B|FGB|JUP|RAC1|RSU1|THY1|GFUS|UTRN|IQGAP1|PPM1F	-4.83862	0	7	0	0	-13.2006	21.034
0	0	1	0	0	-4.43978	GO:0051894	M001	1	0	GO Biological Processes	19	positive regulation of focal adhesion assembly	19_GO:0022610 biological adhesion	-4.43978	21.034	8.77365	28133	25	214	4	1.86916	0.925804	5879|7070|8826|9647	RAC1|THY1|IQGAP1|PPM1F	-2.87286	0	7	0	0	-13.2006	21.034
0	0	1	0	0	-4.15564	GO:0040017	M001	1	0	GO Biological Processes	19	positive regulation of locomotion	19_GO:0040011 locomotion	-4.15564	3.24866	4.90348	28133	607	214	15	7.00935	1.74523	102|1012|2039|2185|3146|4035|5879|6714|7070|7857|8826|9647|9693|22919|29085	ADAM10|CDH13|DMTN|PTK2B|HMGB1|LRP1|RAC1|SRC|THY1|SCG2|IQGAP1|PPM1F|RAPGEF2|MAPRE1|PHPT1	-2.67526	0	7	0	0	-13.2006	21.034
0	0	1	0	0	-4.00416	GO:1903393	M001	1	0	GO Biological Processes	19	positive regulation of adherens junction organization	19_GO:0048518 positive regulation of biological process	-4.00416	16.4328	7.64745	28133	32	214	4	1.86916	0.925804	5879|7070|8826|9647	RAC1|THY1|IQGAP1|PPM1F	-2.56381	0	7	0	0	-13.2006	21.034
0	0	1	0	0	-3.81559	GO:2000147	M001	1	0	GO Biological Processes	19	positive regulation of cell motility	19_GO:0040011 locomotion	-3.81559	3.17872	4.63772	28133	579	214	14	6.54206	1.69028	102|1012|2039|2185|3146|4035|5879|6714|7070|8826|9647|9693|22919|29085	ADAM10|CDH13|DMTN|PTK2B|HMGB1|LRP1|RAC1|SRC|THY1|IQGAP1|PPM1F|RAPGEF2|MAPRE1|PHPT1	-2.41973	0	7	0	0	-13.2006	21.034
0	1	1	0	-2.16899	-3.67926	GO:0051272	M011	2	0	GO Biological Processes	19	positive regulation of cellular component movement	19_GO:0048518 positive regulation of biological process	-3.73765	2.43745	4.29576	28133	597	406	21	5.17241	1.09913	102|1012|2039|2185|3146|3925|4035|5879|5962|6714|7070|7082|7264|8826|8895|9647|9693|22919|23122|29085|57118	ADAM10|CDH13|DMTN|PTK2B|HMGB1|STMN1|LRP1|RAC1|RDX|SRC|THY1|TJP1|GFUS|IQGAP1|CPNE3|PPM1F|RAPGEF2|MAPRE1|CLASP2|PHPT1|CAMK1D	-2.29611	0	7	0	0	-13.2006	21.034
0	0	1	0	0	-3.70734	GO:1901890	M001	1	0	GO Biological Processes	19	positive regulation of cell junction assembly	19_GO:0048518 positive regulation of biological process	-3.70734	13.8382	6.93326	28133	38	214	4	1.86916	0.925804	5879|7070|8826|9647	RAC1|THY1|IQGAP1|PPM1F	-2.34187	0	7	0	0	-13.2006	21.034
0	0	1	0	0	-3.44899	GO:0030335	M001	1	0	GO Biological Processes	19	positive regulation of cell migration	19_GO:0040011 locomotion	-3.44899	3.0793	4.33152	28133	555	214	13	6.07477	1.63286	102|1012|2039|2185|3146|4035|5879|6714|7070|8826|9647|9693|22919	ADAM10|CDH13|DMTN|PTK2B|HMGB1|LRP1|RAC1|SRC|THY1|IQGAP1|PPM1F|RAPGEF2|MAPRE1	-2.15567	0	7	0	0	-13.2006	21.034
0	0	1	0	0	-2.44648	GO:0001667	M001	1	0	GO Biological Processes	19	ameboidal-type cell migration	19_GO:0040011 locomotion	-3.2257	2.4852	3.94609	28133	474	406	17	4.18719	0.994055	348|493|1000|1012|2039|2185|3146|3691|3728|5217|5879|6714|7264|7857|9647|23122|23499	APOE|ATP2B4|CDH2|CDH13|DMTN|PTK2B|HMGB1|ITGB4|JUP|PFN2|RAC1|SRC|GFUS|SCG2|PPM1F|CLASP2|MACF1	-1.86033	0	7	0	0	-13.2006	21.034
0	0	1	0	0	-2.75146	GO:0010631	M001	1	0	GO Biological Processes	19	epithelial cell migration	19_GO:0040011 locomotion	-3.10821	2.70979	3.93975	28133	358	406	14	3.44828	0.905562	348|493|1012|2185|3146|3728|5217|5879|6714|7264|7857|9647|23122|23499	APOE|ATP2B4|CDH13|PTK2B|HMGB1|JUP|PFN2|RAC1|SRC|GFUS|SCG2|PPM1F|CLASP2|MACF1	-1.76341	0	7	0	0	-13.2006	21.034
0	0	1	0	0	-2.7269	GO:0090132	M001	1	0	GO Biological Processes	19	epithelium migration	19_GO:0032501 multicellular organismal process	-3.07332	2.68727	3.90432	28133	361	406	14	3.44828	0.905562	348|493|1012|2185|3146|3728|5217|5879|6714|7264|7857|9647|23122|23499	APOE|ATP2B4|CDH13|PTK2B|HMGB1|JUP|PFN2|RAC1|SRC|GFUS|SCG2|PPM1F|CLASP2|MACF1	-1.73395	0	7	0	0	-13.2006	21.034
0	0	1	0	0	-2.68658	GO:0090130	M001	1	0	GO Biological Processes	19	tissue migration	19_GO:0032501 multicellular organismal process	-3.01613	2.65056	3.84608	28133	366	406	14	3.44828	0.905562	348|493|1012|2185|3146|3728|5217|5879|6714|7264|7857|9647|23122|23499	APOE|ATP2B4|CDH13|PTK2B|HMGB1|JUP|PFN2|RAC1|SRC|GFUS|SCG2|PPM1F|CLASP2|MACF1	-1.68726	0	7	0	0	-13.2006	21.034
0	1	1	0	-2.18876	-2.12506	GO:0010632	M011	2	0	GO Biological Processes	19	regulation of epithelial cell migration	19_GO:0040011 locomotion	-2.89824	2.82829	3.81332	28133	294	406	12	2.95567	0.840523	348|493|2185|3146|3728|5217|5879|6714|7264|9647|23122|23499	APOE|ATP2B4|PTK2B|HMGB1|JUP|PFN2|RAC1|SRC|GFUS|PPM1F|CLASP2|MACF1	-1.58269	0	7	0	0	-13.2006	21.034
0	0	1	0	0	-2.1371	GO:0051496	M001	1	0	GO Biological Processes	19	positive regulation of stress fiber assembly	19_GO:0048518 positive regulation of biological process	-2.1371	7.58438	4.16071	28133	52	214	3	1.40187	0.803676	5217|5879|9647	PFN2|RAC1|PPM1F	-1.18508	0	7	0	0	-13.2006	21.034
1	1	1	-7.77395	-5.5427	-5.59604	GO:0097435	M111	3	0	GO Biological Processes	19	supramolecular fiber organization	19_GO:0071840 cellular component organization or biogenesis	-13.1792	3.9846	9.76806	28133	713	406	41	10.0985	1.49537	88|348|408|822|829|871|1278|1465|1627|1778|2039|2185|2670|2934|3857|3925|4082|4137|4629|4644|5217|5300|5879|5962|6714|7082|7170|7171|7411|7430|8452|9647|10095|10096|10787|22919|23122|23406|50810|55201|55740	ACTN2|APOE|ARRB1|CAPG|CAPZA1|SERPINH1|COL1A2|CSRP1|DBN1|DYNC1H1|DMTN|PTK2B|GFAP|GSN|KRT9|STMN1|MARCKS|MAPT|MYH11|MYO5A|PFN2|PIN1|RAC1|RDX|SRC|TJP1|TPM3|TPM4|VBP1|EZR|CUL3|PPM1F|ARPC1B|ACTR3|NCKAP1|MAPRE1|CLASP2|COTL1|HDGFL3|MAP1S|ENAH	-10.2974	0	8	1	1	-13.1792	20.545
1	1	1	-4.98055	-8.41792	-6.12656	GO:0030029	M111	3	0	GO Biological Processes	19	actin filament-based process	19_GO:0009987 cellular process	-13.0101	3.77643	9.57208	28133	789	406	43	10.5911	1.52721	88|358|408|781|822|829|1020|1465|1627|2039|2185|2317|2934|3728|3925|4035|4082|4629|4637|4644|5066|5217|5879|5898|5962|6714|7082|7170|7171|7430|8452|8826|9647|10095|10096|10787|23043|23122|23406|29085|55740|79784|399687	ACTN2|AQP1|ARRB1|CACNA2D1|CAPG|CAPZA1|CDK5|CSRP1|DBN1|DMTN|PTK2B|FLNB|GSN|JUP|STMN1|LRP1|MARCKS|MYH11|MYL6|MYO5A|PAM|PFN2|RAC1|RALA|RDX|SRC|TJP1|TPM3|TPM4|EZR|CUL3|IQGAP1|PPM1F|ARPC1B|ACTR3|NCKAP1|TNIK|CLASP2|COTL1|PHPT1|ENAH|MYH14|MYO18A	-10.1564	0	8	0	0	-13.1792	20.545
1	1	1	-5.60067	-7.82466	-5.74852	GO:0030036	M111	3	0	GO Biological Processes	19	actin cytoskeleton organization	19_GO:0071840 cellular component organization or biogenesis	-12.8575	3.98236	9.6407	28133	696	406	40	9.85222	1.47905	88|358|408|822|829|1020|1465|1627|2039|2185|2317|2934|3925|4035|4082|4629|4644|5066|5217|5879|5898|5962|6714|7082|7170|7171|7430|8452|8826|9647|10095|10096|10787|23043|23122|23406|29085|55740|79784|399687	ACTN2|AQP1|ARRB1|CAPG|CAPZA1|CDK5|CSRP1|DBN1|DMTN|PTK2B|FLNB|GSN|STMN1|LRP1|MARCKS|MYH11|MYO5A|PAM|PFN2|RAC1|RALA|RDX|SRC|TJP1|TPM3|TPM4|EZR|CUL3|IQGAP1|PPM1F|ARPC1B|ACTR3|NCKAP1|TNIK|CLASP2|COTL1|PHPT1|ENAH|MYH14|MYO18A	-10.0301	0	8	0	0	-13.1792	20.545
1	1	1	-2.16962	-4.8774	-4.55635	GO:0010638	M111	3	0	GO Biological Processes	19	positive regulation of organelle organization	19_GO:0048518 positive regulation of biological process	-9.66491	3.6412	8.10003	28133	628	406	33	8.12808	1.3562	88|408|637|822|1020|1487|1778|2185|2934|3178|4137|4842|5217|5533|5879|6714|6742|7332|8396|8452|9647|10095|10096|10111|10155|10763|10787|11331|22919|54732|54832|55737|80349	ACTN2|ARRB1|BID|CAPG|CDK5|CTBP1|DYNC1H1|PTK2B|GSN|HNRNPA1|MAPT|NOS1|PFN2|PPP3CC|RAC1|SRC|SSBP1|UBE2L3|PIP4K2B|CUL3|PPM1F|ARPC1B|ACTR3|RAD50|TRIM28|NES|NCKAP1|PHB2|MAPRE1|TMED9|VPS13C|VPS35|WDR61	-7.10535	0	8	0	0	-13.1792	20.545
1	1	1	-4.61196	-5.9186	-3.85557	GO:0007015	M111	3	0	GO Biological Processes	19	actin filament organization	19_GO:0071840 cellular component organization or biogenesis	-9.53694	4.29109	8.38066	28133	436	406	27	6.65025	1.23655	88|408|822|829|1627|2039|2185|2934|3925|4082|4644|5217|5879|5962|6714|7082|7170|7171|7430|8452|9647|10095|10096|10787|23122|23406|55740	ACTN2|ARRB1|CAPG|CAPZA1|DBN1|DMTN|PTK2B|GSN|STMN1|MARCKS|MYO5A|PFN2|RAC1|RDX|SRC|TJP1|TPM3|TPM4|EZR|CUL3|PPM1F|ARPC1B|ACTR3|NCKAP1|CLASP2|COTL1|ENAH	-7.01688	0	8	0	0	-13.1792	20.545
1	1	1	-2.31513	-5.26685	-5.45754	GO:0032956	M111	3	0	GO Biological Processes	19	regulation of actin cytoskeleton organization	19_GO:0071840 cellular component organization or biogenesis	-9.34643	4.71115	8.49065	28133	353	406	24	5.91133	1.17044	88|822|829|1020|1627|2039|2185|2934|3925|4035|5066|5217|5879|5962|7082|7430|8826|9647|10095|10096|10787|23122|23406|29085	ACTN2|CAPG|CAPZA1|CDK5|DBN1|DMTN|PTK2B|GSN|STMN1|LRP1|PAM|PFN2|RAC1|RDX|TJP1|EZR|IQGAP1|PPM1F|ARPC1B|ACTR3|NCKAP1|CLASP2|COTL1|PHPT1	-6.87002	0	8	0	0	-13.1792	20.545
1	1	1	-2.53949	-4.20792	-5.98012	GO:0051493	M111	3	0	GO Biological Processes	19	regulation of cytoskeleton organization	19_GO:0071840 cellular component organization or biogenesis	-9.32351	3.82131	8.04071	28133	544	406	30	7.38916	1.29827	88|822|829|1020|1627|1778|2039|2185|2934|3925|4035|4137|5066|5217|5879|5962|7082|7430|8826|9647|10095|10096|10763|10787|22919|23122|23406|29085|50810|55201	ACTN2|CAPG|CAPZA1|CDK5|DBN1|DYNC1H1|DMTN|PTK2B|GSN|STMN1|LRP1|MAPT|PAM|PFN2|RAC1|RDX|TJP1|EZR|IQGAP1|PPM1F|ARPC1B|ACTR3|NES|NCKAP1|MAPRE1|CLASP2|COTL1|PHPT1|HDGFL3|MAP1S	-6.86382	0	8	0	0	-13.1792	20.545
1	1	1	-2.08456	-5.58543	-4.93356	GO:0032970	M111	3	0	GO Biological Processes	19	regulation of actin filament-based process	19_GO:0050789 regulation of biological process	-9.06557	4.38564	8.19999	28133	395	406	25	6.15764	1.19301	88|822|829|1020|1627|2039|2185|2934|3728|3925|4035|5066|5217|5879|5962|7082|7430|8826|9647|10095|10096|10787|23122|23406|29085	ACTN2|CAPG|CAPZA1|CDK5|DBN1|DMTN|PTK2B|GSN|JUP|STMN1|LRP1|PAM|PFN2|RAC1|RDX|TJP1|EZR|IQGAP1|PPM1F|ARPC1B|ACTR3|NCKAP1|CLASP2|COTL1|PHPT1	-6.67979	0	8	0	0	-13.1792	20.545
1	1	1	-2.19016	-6.06366	-4.53801	GO:0090066	M111	3	0	GO Biological Processes	19	regulation of anatomical structure size	19_GO:0065007 biological regulation	-8.98147	3.91961	7.93023	28133	495	406	28	6.89655	1.25758	88|348|358|822|829|952|1020|1627|2039|2185|2244|2934|4035|4137|4842|5217|5879|5962|6647|7143|7430|10095|10096|10787|23111|23406|23499|51520	ACTN2|APOE|AQP1|CAPG|CAPZA1|CD38|CDK5|DBN1|DMTN|PTK2B|FGB|GSN|LRP1|MAPT|NOS1|PFN2|RAC1|RDX|SOD1|TNR|EZR|ARPC1B|ACTR3|NCKAP1|SPART|COTL1|MACF1|LARS1	-6.6182	0	8	0	0	-13.1792	20.545
1	1	1	-2.89317	-5.08539	-3.87721	GO:1902903	M111	3	0	GO Biological Processes	19	regulation of supramolecular fiber organization	19_GO:0071840 cellular component organization or biogenesis	-8.96051	4.50687	8.20547	28133	369	406	24	5.91133	1.17044	88|348|822|829|1627|2039|2185|2934|3925|4137|5217|5879|5962|7082|7411|9647|10095|10096|10787|22919|23122|23406|50810|55201	ACTN2|APOE|CAPG|CAPZA1|DBN1|DMTN|PTK2B|GSN|STMN1|MAPT|PFN2|RAC1|RDX|TJP1|VBP1|PPM1F|ARPC1B|ACTR3|NCKAP1|MAPRE1|CLASP2|COTL1|HDGFL3|MAP1S	-6.60161	0	8	0	0	-13.1792	20.545
0	1	1	0	-5.07437	-5.23652	GO:0032535	M011	2	0	GO Biological Processes	19	regulation of cellular component size	19_GO:0071840 cellular component organization or biogenesis	-8.9371	4.49469	8.18819	28133	370	406	24	5.91133	1.17044	88|348|358|822|829|1020|1627|2039|2185|2934|4035|4137|5217|5879|5962|7143|7430|10095|10096|10787|23111|23406|23499|51520	ACTN2|APOE|AQP1|CAPG|CAPZA1|CDK5|DBN1|DMTN|PTK2B|GSN|LRP1|MAPT|PFN2|RAC1|RDX|TNR|EZR|ARPC1B|ACTR3|NCKAP1|SPART|COTL1|MACF1|LARS1	-6.5883	0	8	0	0	-13.1792	20.545
1	1	1	-2.6077	-4.43067	-5.02434	GO:0051129	M111	3	0	GO Biological Processes	19	negative regulation of cellular component organization	19_GO:0048519 negative regulation of biological process	-8.93436	3.18996	7.51563	28133	782	406	36	8.867	1.41079	348|822|829|952|1020|1487|2039|2934|3020|3146|3178|3925|4035|4134|4137|4974|5217|5716|5879|5962|6714|6812|7070|7082|7143|7411|9693|10111|22919|23111|23122|29978|50810|55611|112755|140885	APOE|CAPG|CAPZA1|CD38|CDK5|CTBP1|DMTN|GSN|H3-3A|HMGB1|HNRNPA1|STMN1|LRP1|MAP4|MAPT|OMG|PFN2|PSMD10|RAC1|RDX|SRC|STXBP1|THY1|TJP1|TNR|VBP1|RAPGEF2|RAD50|MAPRE1|SPART|CLASP2|UBQLN2|HDGFL3|OTUB1|STX1B|SIRPA	-6.5883	0	8	0	0	-13.1792	20.545
1	1	1	-2.20409	-3.95044	-5.20933	GO:0043254	M111	3	0	GO Biological Processes	19	regulation of protein complex assembly	19_GO:0071840 cellular component organization or biogenesis	-8.39881	3.80267	7.58909	28133	492	406	27	6.65025	1.23655	348|637|822|829|1627|1854|2039|2185|2670|2934|3020|3146|3925|4137|5217|5701|5879|5962|6714|6804|6812|10095|10096|10787|22919|23406|112755	APOE|BID|CAPG|CAPZA1|DBN1|DUT|DMTN|PTK2B|GFAP|GSN|H3-3A|HMGB1|STMN1|MAPT|PFN2|PSMC2|RAC1|RDX|SRC|STX1A|STXBP1|ARPC1B|ACTR3|NCKAP1|MAPRE1|COTL1|STX1B	-6.17344	0	8	0	0	-13.1792	20.545
1	1	1	-4.29121	-5.15233	-2.70313	GO:0051258	M111	3	0	GO Biological Processes	19	protein polymerization	19_GO:0071840 cellular component organization or biogenesis	-7.86527	4.69784	7.72595	28133	295	406	20	4.92611	1.07404	822|829|1627|2039|2185|2244|2934|3925|4137|5217|5300|5879|5962|10095|10096|10787|22919|23122|23406|50810	CAPG|CAPZA1|DBN1|DMTN|PTK2B|FGB|GSN|STMN1|MAPT|PFN2|PIN1|RAC1|RDX|ARPC1B|ACTR3|NCKAP1|MAPRE1|CLASP2|COTL1|HDGFL3	-5.74585	0	8	0	0	-13.1792	20.545
1	1	1	-2.13538	-4.59398	-2.9145	GO:0110053	M111	3	0	GO Biological Processes	19	regulation of actin filament organization	19_GO:0071840 cellular component organization or biogenesis	-6.95632	4.56878	7.17005	28133	273	406	18	4.4335	1.02156	88|822|829|1627|2039|2185|2934|3925|5217|5879|5962|7082|9647|10095|10096|10787|23122|23406	ACTN2|CAPG|CAPZA1|DBN1|DMTN|PTK2B|GSN|STMN1|PFN2|RAC1|RDX|TJP1|PPM1F|ARPC1B|ACTR3|NCKAP1|CLASP2|COTL1	-5.03802	0	8	0	0	-13.1792	20.545
0	1	1	0	-3.53364	-3.46195	GO:0032271	M011	2	0	GO Biological Processes	19	regulation of protein polymerization	19_GO:0071840 cellular component organization or biogenesis	-6.69262	4.92751	7.15741	28133	225	406	16	3.94089	0.965613	822|829|1627|2039|2185|2934|3925|4137|5217|5879|5962|10095|10096|10787|22919|23406	CAPG|CAPZA1|DBN1|DMTN|PTK2B|GSN|STMN1|MAPT|PFN2|RAC1|RDX|ARPC1B|ACTR3|NCKAP1|MAPRE1|COTL1	-4.83477	0	8	0	0	-13.1792	20.545
1	1	1	-2.19747	-3.9217	-2.38976	GO:1901879	M111	3	0	GO Biological Processes	19	regulation of protein depolymerization	19_GO:0071840 cellular component organization or biogenesis	-6.37767	8.15213	7.99109	28133	85	406	10	2.46305	0.769234	88|822|829|2039|2934|5962|10763|23122|50810|55201	ACTN2|CAPG|CAPZA1|DMTN|GSN|RDX|NES|CLASP2|HDGFL3|MAP1S	-4.55659	0	8	0	0	-13.1792	20.545
0	1	1	0	-2.85631	-3.59447	GO:0008154	M011	2	0	GO Biological Processes	19	actin polymerization or depolymerization	19_GO:0071840 cellular component organization or biogenesis	-6.2064	4.8344	6.82946	28133	215	406	15	3.69458	0.936149	88|822|829|1627|2039|2185|2934|5217|5879|5962|10095|10096|10787|23406|55740	ACTN2|CAPG|CAPZA1|DBN1|DMTN|PTK2B|GSN|PFN2|RAC1|RDX|ARPC1B|ACTR3|NCKAP1|COTL1|ENAH	-4.405	0	8	0	0	-13.1792	20.545
0	1	1	0	-4.43798	-2.10212	GO:1902904	M011	2	0	GO Biological Processes	19	negative regulation of supramolecular fiber organization	19_GO:0048519 negative regulation of biological process	-6.17079	5.5951	7.07551	28133	161	406	13	3.20197	0.873733	348|822|829|2039|2934|3925|5217|5962|7082|7411|22919|23122|50810	APOE|CAPG|CAPZA1|DMTN|GSN|STMN1|PFN2|RDX|TJP1|VBP1|MAPRE1|CLASP2|HDGFL3	-4.37655	0	8	0	0	-13.1792	20.545
1	1	0	-2.7963	-4.35726	0	GO:0051261	M110	2	0	GO Biological Processes	19	protein depolymerization	19_GO:0071840 cellular component organization or biogenesis	-6.11381	6.74535	7.40514	28133	113	406	11	2.70936	0.80576	88|822|829|2039|2934|3925|5962|10763|23122|50810|55201	ACTN2|CAPG|CAPZA1|DMTN|GSN|STMN1|RDX|NES|CLASP2|HDGFL3|MAP1S	-4.3301	0	8	0	0	-13.1792	20.545
0	1	1	0	-2.9025	-3.43421	GO:0044089	M011	2	0	GO Biological Processes	19	positive regulation of cellular component biogenesis	19_GO:0048518 positive regulation of biological process	-5.63036	2.9857	5.72779	28133	557	406	24	5.91133	1.17044	637|822|1778|2185|2934|4137|5064|5217|5701|5879|5898|6714|7070|8396|8826|9647|10095|10096|10211|10787|22919|23122|94030|375790	BID|CAPG|DYNC1H1|PTK2B|GSN|MAPT|PALM|PFN2|PSMC2|RAC1|RALA|SRC|THY1|PIP4K2B|IQGAP1|PPM1F|ARPC1B|ACTR3|FLOT1|NCKAP1|MAPRE1|CLASP2|LRRC4B|AGRN	-3.91786	0	8	0	0	-13.1792	20.545
0	1	1	0	-2.39909	-2.5225	GO:0008064	M011	2	0	GO Biological Processes	19	regulation of actin polymerization or depolymerization	19_GO:0071840 cellular component organization or biogenesis	-5.49278	4.86925	6.38923	28133	185	406	13	3.20197	0.873733	88|822|829|1627|2039|2185|2934|5217|5962|10095|10096|10787|23406	ACTN2|CAPG|CAPZA1|DBN1|DMTN|PTK2B|GSN|PFN2|RDX|ARPC1B|ACTR3|NCKAP1|COTL1	-3.80226	0	8	0	0	-13.1792	20.545
0	1	1	0	-2.38919	-2.51096	GO:0030832	M011	2	0	GO Biological Processes	19	regulation of actin filament length	19_GO:0071840 cellular component organization or biogenesis	-5.46694	4.84307	6.36324	28133	186	406	13	3.20197	0.873733	88|822|829|1627|2039|2185|2934|5217|5962|10095|10096|10787|23406	ACTN2|CAPG|CAPZA1|DBN1|DMTN|PTK2B|GSN|PFN2|RDX|ARPC1B|ACTR3|NCKAP1|COTL1	-3.78198	0	8	0	0	-13.1792	20.545
1	1	0	-2.58196	-3.19983	0	GO:0010639	M110	2	0	GO Biological Processes	19	negative regulation of organelle organization	19_GO:0048519 negative regulation of biological process	-5.43933	3.30755	5.75864	28133	419	406	20	4.92611	1.07404	822|829|1487|2039|2934|3020|3178|3925|4134|4137|5217|5716|5962|6714|7082|10111|22919|23122|50810|55611	CAPG|CAPZA1|CTBP1|DMTN|GSN|H3-3A|HNRNPA1|STMN1|MAP4|MAPT|PFN2|PSMD10|RDX|SRC|TJP1|RAD50|MAPRE1|CLASP2|HDGFL3|OTUB1	-3.75712	0	8	0	0	-13.1792	20.545
0	1	1	0	-3.1568	-2.48812	GO:0030041	M011	2	0	GO Biological Processes	19	actin filament polymerization	19_GO:0071840 cellular component organization or biogenesis	-5.41579	4.79154	6.31182	28133	188	406	13	3.20197	0.873733	822|829|1627|2039|2185|2934|5217|5879|5962|10095|10096|10787|23406	CAPG|CAPZA1|DBN1|DMTN|PTK2B|GSN|PFN2|RAC1|RDX|ARPC1B|ACTR3|NCKAP1|COTL1	-3.73631	0	8	0	0	-13.1792	20.545
0	1	1	0	-2.06264	-4.24784	GO:0051495	M011	2	0	GO Biological Processes	19	positive regulation of cytoskeleton organization	19_GO:0048518 positive regulation of biological process	-5.29643	4.35024	6.07799	28133	223	406	14	3.44828	0.905562	88|1020|1778|2185|2934|4137|5217|5879|9647|10095|10096|10763|10787|22919	ACTN2|CDK5|DYNC1H1|PTK2B|GSN|MAPT|PFN2|RAC1|PPM1F|ARPC1B|ACTR3|NES|NCKAP1|MAPRE1	-3.63737	0	8	0	0	-13.1792	20.545
0	1	1	0	-2.56681	-2.01651	GO:0030833	M011	2	0	GO Biological Processes	19	regulation of actin filament polymerization	19_GO:0071840 cellular component organization or biogenesis	-5.16174	4.92022	6.18538	28133	169	406	12	2.95567	0.840523	822|829|1627|2039|2185|2934|5217|5962|10095|10096|10787|23406	CAPG|CAPZA1|DBN1|DMTN|PTK2B|GSN|PFN2|RDX|ARPC1B|ACTR3|NCKAP1|COTL1	-3.51632	0	8	0	0	-13.1792	20.545
0	1	1	0	-4.0523	-2.37731	GO:0022411	M011	2	0	GO Biological Processes	19	cellular component disassembly	19_GO:0071840 cellular component organization or biogenesis	-5.01866	2.82078	5.29043	28133	565	406	23	5.66502	1.14729	88|102|822|826|829|960|1020|2039|2934|3146|3925|4035|5962|6601|8562|10211|10763|11240|11331|23122|50810|54832|55201	ACTN2|ADAM10|CAPG|CAPNS1|CAPZA1|CD44|CDK5|DMTN|GSN|HMGB1|STMN1|LRP1|RDX|SMARCC2|DENR|FLOT1|NES|PADI2|PHB2|CLASP2|HDGFL3|VPS13C|MAP1S	-3.39053	0	8	0	0	-13.1792	20.545
0	1	0	0	-3.22586	0	GO:0043244	M010	1	0	GO Biological Processes	19	regulation of protein complex disassembly	19_GO:0071840 cellular component organization or biogenesis	-5.00266	5.77443	6.34226	28133	120	406	10	2.46305	0.769234	88|822|829|2039|2934|5962|10763|23122|50810|55201	ACTN2|CAPG|CAPZA1|DMTN|GSN|RDX|NES|CLASP2|HDGFL3|MAP1S	-3.37936	0	8	0	0	-13.1792	20.545
0	1	1	0	-2.81792	-3.0127	GO:0031333	M011	2	0	GO Biological Processes	19	negative regulation of protein complex assembly	19_GO:0048519 negative regulation of biological process	-4.96724	5.15016	6.12555	28133	148	406	11	2.70936	0.80576	822|829|2039|2934|3146|3925|5217|5962|6714|6812|22919	CAPG|CAPZA1|DMTN|GSN|HMGB1|STMN1|PFN2|RDX|SRC|STXBP1|MAPRE1	-3.34712	0	8	0	0	-13.1792	20.545
0	1	1	0	-3.00476	-2.52401	GO:0032272	M011	2	0	GO Biological Processes	19	negative regulation of protein polymerization	19_GO:0048519 negative regulation of biological process	-4.76816	7.10698	6.53553	28133	78	406	8	1.97044	0.689759	822|829|2039|2934|3925|5217|5962|22919	CAPG|CAPZA1|DMTN|GSN|STMN1|PFN2|RDX|MAPRE1	-3.17193	0	8	0	0	-13.1792	20.545
0	1	1	0	-3.99579	-2.44568	GO:0022617	M011	2	0	GO Biological Processes	19	extracellular matrix disassembly	19_GO:0071840 cellular component organization or biogenesis	-4.60806	6.7603	6.32106	28133	82	406	8	1.97044	0.689759	102|822|826|960|2934|4035|10211|23122	ADAM10|CAPG|CAPNS1|CD44|GSN|LRP1|FLOT1|CLASP2	-3.03287	0	8	0	0	-13.1792	20.545
0	1	0	0	-3.49857	0	GO:0051494	M010	1	0	GO Biological Processes	19	negative regulation of cytoskeleton organization	19_GO:0048519 negative regulation of biological process	-4.59882	4.70509	5.72287	28133	162	406	11	2.70936	0.80576	822|829|2039|2934|3925|5217|5962|7082|22919|23122|50810	CAPG|CAPZA1|DMTN|GSN|STMN1|PFN2|RDX|TJP1|MAPRE1|CLASP2|HDGFL3	-3.02664	0	8	0	0	-13.1792	20.545
0	1	1	0	-2.23011	-3.01534	GO:1902905	M011	2	0	GO Biological Processes	19	positive regulation of supramolecular fiber organization	19_GO:0048518 positive regulation of biological process	-4.36703	4.09614	5.3573	28133	203	406	12	2.95567	0.840523	88|348|2185|2934|4137|5217|5879|9647|10095|10096|10787|22919	ACTN2|APOE|PTK2B|GSN|MAPT|PFN2|RAC1|PPM1F|ARPC1B|ACTR3|NCKAP1|MAPRE1	-2.82812	0	8	0	0	-13.1792	20.545
0	1	0	0	-3.18161	0	GO:1901880	M010	1	0	GO Biological Processes	19	negative regulation of protein depolymerization	19_GO:0048519 negative regulation of biological process	-4.16821	6.92931	6.01033	28133	70	406	7	1.72414	0.646021	822|829|2039|2934|5962|23122|50810	CAPG|CAPZA1|DMTN|GSN|RDX|CLASP2|HDGFL3	-2.65811	0	8	0	0	-13.1792	20.545
0	1	1	0	-2.45654	-2.09179	GO:0030834	M011	2	0	GO Biological Processes	19	regulation of actin filament depolymerization	19_GO:0071840 cellular component organization or biogenesis	-3.90219	7.69923	5.9627	28133	54	406	6	1.47783	0.598848	88|822|829|2039|2934|5962	ACTN2|CAPG|CAPZA1|DMTN|GSN|RDX	-2.43371	0	8	0	0	-13.1792	20.545
0	1	1	0	-2.17808	-2.46304	GO:0032273	M011	2	0	GO Biological Processes	19	positive regulation of protein polymerization	19_GO:0048518 positive regulation of biological process	-3.87852	4.72453	5.19019	28133	132	406	9	2.21675	0.73068	2185|2934|4137|5217|5879|10095|10096|10787|22919	PTK2B|GSN|MAPT|PFN2|RAC1|ARPC1B|ACTR3|NCKAP1|MAPRE1	-2.41282	0	8	0	0	-13.1792	20.545
0	1	0	0	-2.94357	0	GO:0043242	M010	1	0	GO Biological Processes	19	negative regulation of protein complex disassembly	19_GO:0048519 negative regulation of biological process	-3.76463	5.98829	5.44032	28133	81	406	7	1.72414	0.646021	822|829|2039|2934|5962|23122|50810	CAPG|CAPZA1|DMTN|GSN|RDX|CLASP2|HDGFL3	-2.31901	0	8	0	0	-13.1792	20.545
0	1	0	0	-2.34793	0	GO:0030042	M010	1	0	GO Biological Processes	19	actin filament depolymerization	19_GO:0071840 cellular component organization or biogenesis	-3.68681	7.04676	5.62611	28133	59	406	6	1.47783	0.598848	88|822|829|2039|2934|5962	ACTN2|CAPG|CAPZA1|DMTN|GSN|RDX	-2.25218	0	8	0	0	-13.1792	20.545
0	0	1	0	0	-2.78704	GO:0031334	M001	1	0	GO Biological Processes	19	positive regulation of protein complex assembly	19_GO:0048518 positive regulation of biological process	-3.53276	3.14969	4.42161	28133	286	406	13	3.20197	0.873733	637|822|2185|2934|4137|5217|5701|5879|6714|10095|10096|10787|22919	BID|CAPG|PTK2B|GSN|MAPT|PFN2|PSMC2|RAC1|SRC|ARPC1B|ACTR3|NCKAP1|MAPRE1	-2.12079	0	8	0	0	-13.1792	20.545
0	1	0	0	-2.80019	0	GO:0051693	M010	1	0	GO Biological Processes	19	actin filament capping	19_GO:0048519 negative regulation of biological process	-3.52511	8.45038	5.77685	28133	41	406	5	1.23153	0.547354	822|829|2039|2934|5962	CAPG|CAPZA1|DMTN|GSN|RDX	-2.11511	0	8	0	0	-13.1792	20.545
0	1	0	0	-2.24903	0	GO:0030837	M010	1	0	GO Biological Processes	19	negative regulation of actin filament polymerization	19_GO:0048519 negative regulation of biological process	-3.49194	6.49623	5.32664	28133	64	406	6	1.47783	0.598848	822|829|2039|2934|5217|5962	CAPG|CAPZA1|DMTN|GSN|PFN2|RDX	-2.08437	0	8	0	0	-13.1792	20.545
0	1	0	0	-3.3862	0	GO:0051016	M010	1	0	GO Biological Processes	19	barbed-end actin filament capping	19_GO:0048519 negative regulation of biological process	-3.3862	20.545	7.49307	28133	26	158	3	1.89873	1.08578	829|2934|5962	CAPZA1|GSN|RDX	-2.11115	0	8	0	0	-13.1792	20.545
0	1	0	0	-2.78574	0	GO:0043624	M010	1	0	GO Biological Processes	19	cellular protein complex disassembly	19_GO:0071840 cellular component organization or biogenesis	-3.38521	3.43344	4.40475	28133	222	406	11	2.70936	0.80576	88|822|829|2039|2934|3925|5962|10763|23122|50810|55201	ACTN2|CAPG|CAPZA1|DMTN|GSN|STMN1|RDX|NES|CLASP2|HDGFL3|MAP1S	-1.99526	0	8	0	0	-13.1792	20.545
0	1	0	0	-2.68308	0	GO:0030835	M010	1	0	GO Biological Processes	19	negative regulation of actin filament depolymerization	19_GO:0048519 negative regulation of biological process	-3.33334	7.69923	5.4423	28133	45	406	5	1.23153	0.547354	822|829|2039|2934|5962	CAPG|CAPZA1|DMTN|GSN|RDX	-1.95079	0	8	0	0	-13.1792	20.545
0	1	0	0	-2.49628	0	GO:0032984	M010	1	0	GO Biological Processes	19	protein-containing complex disassembly	19_GO:0071840 cellular component organization or biogenesis	-2.83819	2.64944	3.70272	28133	340	406	13	3.20197	0.873733	88|822|829|2039|2934|3925|5962|6601|8562|10763|23122|50810|55201	ACTN2|CAPG|CAPZA1|DMTN|GSN|STMN1|RDX|SMARCC2|DENR|NES|CLASP2|HDGFL3|MAP1S	-1.53234	0	8	0	0	-13.1792	20.545
1	1	1	-3.94287	-6.24681	-8.07598	ko05010	M111	3	0	KEGG Pathway	24	Alzheimer's disease		-13.1088	8.50968	11.9192	28133	171	406	21	5.17241	1.09913	102|348|513|515|637|805|1020|1329|1340|1347|4035|4137|4724|4729|4842|5533|7381|8883|9377|10313|29796	ADAM10|APOE|ATP5F1D|ATP5PB|BID|CALM2|CDK5|COX5B|COX6B1|COX7A2|LRP1|MAPT|NDUFS4|NDUFV2|NOS1|PPP3CC|UQCRB|NAE1|COX5A|RTN3|UQCR10	-10.2412	0	9	1	1	-13.1088	10.0912
1	1	1	-3.62112	-5.75314	-8.4054	hsa05010	M111	3	0	KEGG Pathway	24	Alzheimer disease		-12.8905	7.7778	11.5223	28133	196	406	22	5.41872	1.12354	102|348|513|515|637|805|1020|1329|1340|1347|4035|4137|4724|4729|4842|5533|7381|8883|9377|10313|29796|114787	ADAM10|APOE|ATP5F1D|ATP5PB|BID|CALM2|CDK5|COX5B|COX6B1|COX7A2|LRP1|MAPT|NDUFS4|NDUFV2|NOS1|PPP3CC|UQCRB|NAE1|COX5A|RTN3|UQCR10|GPRIN1	-10.0501	0	9	0	0	-13.1088	10.0912
1	1	1	-4.76111	-3.1786	-7.05237	GO:0006091	M111	3	0	GO Biological Processes	19	generation of precursor metabolites and energy	19_GO:0008152 metabolic process	-11.3139	4.33082	9.20403	28133	512	406	32	7.88177	1.33728	291|513|515|521|637|1329|1340|1347|1528|2023|2235|2631|3146|4199|4724|4729|5208|5224|7264|7381|8802|9377|9551|10632|11331|23498|29796|55276|56898|79751|80777|201626	SLC25A4|ATP5F1D|ATP5PB|ATP5ME|BID|COX5B|COX6B1|COX7A2|CYB5A|ENO1|FECH|NIPSNAP2|HMGB1|ME1|NDUFS4|NDUFV2|PFKFB2|PGAM2|GFUS|UQCRB|SUCLG1|COX5A|ATP5MF|ATP5MG|PHB2|HAAO|UQCR10|PGM2|BDH2|SLC25A22|CYB5B|PDE12	-8.58847	0	9	0	0	-13.1088	10.0912
1	1	1	-2.53894	-3.0242	-7.10473	ko00190	M111	3	0	KEGG Pathway	24	Oxidative phosphorylation		-11.0087	8.85701	10.9905	28133	133	406	17	4.18719	0.994055	513|515|521|534|1329|1340|1347|4724|4729|7381|9377|9551|10632|29796|51382|51606|64077	ATP5F1D|ATP5PB|ATP5ME|ATP6V1G2|COX5B|COX6B1|COX7A2|NDUFS4|NDUFV2|UQCRB|COX5A|ATP5MF|ATP5MG|UQCR10|ATP6V1D|ATP6V1H|LHPP	-8.32185	0	9	0	0	-13.1088	10.0912
1	0	1	-2.94489	0	-8.17421	WP111	M101	2	0	WikiPathways	27	Electron Transport Chain (OXPHOS system in mitochondria)		-10.6125	10.0912	11.1851	28133	103	406	15	3.69458	0.936149	291|293|513|515|521|1329|1340|1347|4724|4729|7381|9377|9551|10632|29796	SLC25A4|SLC25A6|ATP5F1D|ATP5PB|ATP5ME|COX5B|COX6B1|COX7A2|NDUFS4|NDUFV2|UQCRB|COX5A|ATP5MF|ATP5MG|UQCR10	-7.95257	0	9	0	0	-13.1088	10.0912
1	1	1	-2.18901	-2.5891	-6.18215	hsa00190	M111	3	0	KEGG Pathway	24	Oxidative phosphorylation		-9.42412	7.05379	9.49472	28133	167	406	17	4.18719	0.994055	513|515|521|534|1329|1340|1347|4724|4729|7381|9377|9551|10632|29796|51382|51606|64077	ATP5F1D|ATP5PB|ATP5ME|ATP6V1G2|COX5B|COX6B1|COX7A2|NDUFS4|NDUFV2|UQCRB|COX5A|ATP5MF|ATP5MG|UQCR10|ATP6V1D|ATP6V1H|LHPP	-6.9204	0	9	0	0	-13.1088	10.0912
1	1	1	-2.37319	-2.00697	-6.66798	GO:0006119	M111	3	0	GO Biological Processes	19	oxidative phosphorylation	19_GO:0008152 metabolic process	-9.2933	7.49115	9.58079	28133	148	406	16	3.94089	0.965613	513|515|521|637|1329|1340|1347|2631|4724|4729|7381|9377|9551|10632|29796|201626	ATP5F1D|ATP5PB|ATP5ME|BID|COX5B|COX6B1|COX7A2|NIPSNAP2|NDUFS4|NDUFV2|UQCRB|COX5A|ATP5MF|ATP5MG|UQCR10|PDE12	-6.86382	0	9	0	0	-13.1088	10.0912
1	1	1	-2.1101	-2.4912	-5.05898	R-HSA-1428517	M111	3	0	Reactome Gene Sets	6	The citric acid (TCA) cycle and respiratory electron transport		-8.18877	6.29937	8.5339	28133	176	406	16	3.94089	0.965613	513|515|521|1329|1340|2739|4199|4724|4729|7381|8802|9377|9551|10632|25874|29796	ATP5F1D|ATP5PB|ATP5ME|COX5B|COX6B1|GLO1|ME1|NDUFS4|NDUFV2|UQCRB|SUCLG1|COX5A|ATP5MF|ATP5MG|MPC2|UQCR10	-6.00595	0	9	0	0	-13.1088	10.0912
1	1	1	-3.65719	-2.32163	-5.61175	ko05016	M111	3	0	KEGG Pathway	24	Huntington's disease		-7.61712	5.74451	8.00329	28133	193	406	16	3.94089	0.965613	291|293|513|515|1175|1211|1212|1329|1340|1347|4724|4729|6647|7381|9377|29796	SLC25A4|SLC25A6|ATP5F1D|ATP5PB|AP2S1|CLTA|CLTB|COX5B|COX6B1|COX7A2|NDUFS4|NDUFV2|SOD1|UQCRB|COX5A|UQCR10	-5.55488	0	9	0	0	-13.1088	10.0912
1	1	1	-3.33283	-2.07056	-5.92734	hsa05016	M111	3	0	KEGG Pathway	24	Huntington disease		-7.54272	5.30623	7.79467	28133	222	406	17	4.18719	0.994055	291|293|513|515|1175|1211|1212|1329|1340|1347|4724|4729|6647|7381|9377|29796|114787	SLC25A4|SLC25A6|ATP5F1D|ATP5PB|AP2S1|CLTA|CLTB|COX5B|COX6B1|COX7A2|NDUFS4|NDUFV2|SOD1|UQCRB|COX5A|UQCR10|GPRIN1	-5.50188	0	9	0	0	-13.1088	10.0912
1	1	1	-4.83661	-3.28132	-3.35227	GO:0022900	M111	3	0	GO Biological Processes	19	electron transport chain	19_GO:0008152 metabolic process	-7.27324	5.83931	7.83746	28133	178	406	15	3.69458	0.936149	637|1329|1340|1347|1528|4199|4724|4729|7264|7381|9377|23498|29796|79751|80777	BID|COX5B|COX6B1|COX7A2|CYB5A|ME1|NDUFS4|NDUFV2|GFUS|UQCRB|COX5A|HAAO|UQCR10|SLC25A22|CYB5B	-5.29273	0	9	0	0	-13.1088	10.0912
1	1	1	-3.39945	-5.27998	-3.48561	ko04260	M111	3	0	KEGG Pathway	24	Cardiac muscle contraction		-6.73438	8.88373	8.43696	28133	78	406	10	2.46305	0.769234	478|781|1329|1340|1347|7170|7171|7381|9377|29796	ATP1A3|CACNA2D1|COX5B|COX6B1|COX7A2|TPM3|TPM4|UQCRB|COX5A|UQCR10	-4.86402	0	9	0	0	-13.1088	10.0912
0	0	1	0	0	-5.26788	R-HSA-163200	M001	1	0	Reactome Gene Sets	6	Respiratory electron transport, ATP synthesis by chemiosmotic coupling, and heat production by uncoupling proteins.		-6.54966	6.65214	7.6637	28133	125	406	12	2.95567	0.840523	513|515|521|1329|1340|4724|4729|7381|9377|9551|10632|29796	ATP5F1D|ATP5PB|ATP5ME|COX5B|COX6B1|NDUFS4|NDUFV2|UQCRB|COX5A|ATP5MF|ATP5MG|UQCR10	-4.70264	0	9	0	0	-13.1088	10.0912
1	0	1	-2.10163	0	-4.17608	hsa05012	M101	2	0	KEGG Pathway	24	Parkinson disease		-6.48944	5.48081	7.23632	28133	177	406	14	3.44828	0.905562	291|293|513|515|1329|1340|1347|4724|4729|7314|7332|7381|9377|29796	SLC25A4|SLC25A6|ATP5F1D|ATP5PB|COX5B|COX6B1|COX7A2|NDUFS4|NDUFV2|UBB|UBE2L3|UQCRB|COX5A|UQCR10	-4.65428	0	9	0	0	-13.1088	10.0912
1	1	1	-3.34116	-2.06772	-4.37908	GO:0055114	M111	3	0	GO Biological Processes	19	oxidation-reduction process	19_GO:0008152 metabolic process	-6.27051	3.24811	6.2122	28133	512	406	24	5.91133	1.17044	39|513|637|1329|1340|1347|1528|2023|3146|4199|4724|4729|5224|7264|7381|8802|9377|10994|23498|29796|55276|56898|79751|80777	ACAT2|ATP5F1D|BID|COX5B|COX6B1|COX7A2|CYB5A|ENO1|HMGB1|ME1|NDUFS4|NDUFV2|PGAM2|GFUS|UQCRB|SUCLG1|COX5A|ILVBL|HAAO|UQCR10|PGM2|BDH2|SLC25A22|CYB5B	-4.46184	0	9	0	0	-13.1088	10.0912
1	1	1	-3.14588	-4.89189	-3.17725	hsa04260	M111	3	0	KEGG Pathway	24	Cardiac muscle contraction		-6.09845	7.61463	7.64775	28133	91	406	10	2.46305	0.769234	478|781|1329|1340|1347|7170|7171|7381|9377|29796	ATP1A3|CACNA2D1|COX5B|COX6B1|COX7A2|TPM3|TPM4|UQCRB|COX5A|UQCR10	-4.31704	0	9	0	0	-13.1088	10.0912
1	0	1	-2.14191	0	-2.92463	hsa04714	M101	2	0	KEGG Pathway	24	thermogenesis		-4.33178	3.56656	5.14694	28133	272	406	14	3.44828	0.905562	513|515|521|1329|1340|1347|4724|4729|6601|7381|9377|9551|10632|29796	ATP5F1D|ATP5PB|ATP5ME|COX5B|COX6B1|COX7A2|NDUFS4|NDUFV2|SMARCC2|UQCRB|COX5A|ATP5MF|ATP5MG|UQCR10	-2.79504	0	9	0	0	-13.1088	10.0912
0	1	1	0	-3.75838	-3.05885	WP2059	M011	2	0	WikiPathways	27	Alzheimers Disease		-4.28963	4.77883	5.52037	28133	145	406	10	2.46305	0.769234	102|348|637|805|1020|4035|4137|4842|5533|8883	ADAM10|APOE|BID|CALM2|CDK5|LRP1|MAPT|NOS1|PPP3CC|NAE1	-2.75837	0	9	0	0	-13.1088	10.0912
1	0	1	-2.74093	0	-2.68963	GO:0022904	M101	2	0	GO Biological Processes	19	respiratory electron transport chain	19_GO:0008152 metabolic process	-4.28374	5.33024	5.67955	28133	117	406	9	2.21675	0.73068	637|1329|1340|4724|4729|7381|9377|29796|79751	BID|COX5B|COX6B1|NDUFS4|NDUFV2|UQCRB|COX5A|UQCR10|SLC25A22	-2.75414	0	9	0	0	-13.1088	10.0912
1	0	1	-2.36283	0	-2.99757	ko04932	M101	2	0	KEGG Pathway	24	Non-alcoholic fatty liver disease (NAFLD)		-4.18976	4.65054	5.40639	28133	149	406	10	2.46305	0.769234	637|1329|1340|1347|4724|4729|5879|7381|9377|29796	BID|COX5B|COX6B1|COX7A2|NDUFS4|NDUFV2|RAC1|UQCRB|COX5A|UQCR10	-2.67503	0	9	0	0	-13.1088	10.0912
1	0	1	-2.3023	0	-2.90925	WP4396	M101	2	0	WikiPathways	27	Nonalcoholic fatty liver disease		-4.04614	4.47052	5.24281	28133	155	406	10	2.46305	0.769234	637|1329|1340|1347|4724|4729|5879|7381|9377|29796	BID|COX5B|COX6B1|COX7A2|NDUFS4|NDUFV2|RAC1|UQCRB|COX5A|UQCR10	-2.55822	0	9	0	0	-13.1088	10.0912
1	0	1	-2.83489	0	-2.4995	GO:0045333	M101	2	0	GO Biological Processes	19	cellular respiration	19_GO:0008152 metabolic process	-4.03168	4.07606	5.10703	28133	187	406	11	2.70936	0.80576	513|637|1329|1340|4724|4729|7381|8802|9377|29796|79751	ATP5F1D|BID|COX5B|COX6B1|NDUFS4|NDUFV2|UQCRB|SUCLG1|COX5A|UQCR10|SLC25A22	-2.54551	0	9	0	0	-13.1088	10.0912
1	0	1	-2.01592	0	-3.01157	GO:0042775	M101	2	0	GO Biological Processes	19	mitochondrial ATP synthesis coupled electron transport	19_GO:0008152 metabolic process	-4.01886	5.59944	5.54743	28133	99	406	8	1.97044	0.689759	637|1329|1340|4724|4729|7381|9377|29796	BID|COX5B|COX6B1|NDUFS4|NDUFV2|UQCRB|COX5A|UQCR10	-2.53386	0	9	0	0	-13.1088	10.0912
1	0	1	-2.00406	0	-2.99195	GO:0042773	M101	2	0	GO Biological Processes	19	ATP synthesis coupled electron transport	19_GO:0008152 metabolic process	-3.98808	5.54345	5.5076	28133	100	406	8	1.97044	0.689759	637|1329|1340|4724|4729|7381|9377|29796	BID|COX5B|COX6B1|NDUFS4|NDUFV2|UQCRB|COX5A|UQCR10	-2.50576	0	9	0	0	-13.1088	10.0912
1	0	1	-2.17105	0	-2.71832	hsa04932	M101	2	0	KEGG Pathway	24	Non-alcoholic fatty liver disease		-3.73694	4.10018	4.89151	28133	169	406	10	2.46305	0.769234	637|1329|1340|1347|4724|4729|5879|7381|9377|29796	BID|COX5B|COX6B1|COX7A2|NDUFS4|NDUFV2|RAC1|UQCRB|COX5A|UQCR10	-2.29611	0	9	0	0	-13.1088	10.0912
1	0	1	-2.82718	0	-2.25325	GO:0015980	M101	2	0	GO Biological Processes	19	energy derivation by oxidation of organic compounds	19_GO:0008152 metabolic process	-3.65171	3.24032	4.54249	28133	278	406	13	3.20197	0.873733	513|637|1329|1340|3146|4724|4729|7381|8802|9377|29796|55276|79751	ATP5F1D|BID|COX5B|COX6B1|HMGB1|NDUFS4|NDUFV2|UQCRB|SUCLG1|COX5A|UQCR10|PGM2|SLC25A22	-2.22375	0	9	0	0	-13.1088	10.0912
1	0	1	-2.18343	0	-2.37163	GO:0009060	M101	2	0	GO Biological Processes	19	aerobic respiration	19_GO:0008152 metabolic process	-3.60237	5.64014	5.21493	28133	86	406	7	1.72414	0.646021	513|1329|1340|7381|8802|9377|29796	ATP5F1D|COX5B|COX6B1|UQCRB|SUCLG1|COX5A|UQCR10	-2.18045	0	9	0	0	-13.1088	10.0912
0	0	1	0	0	-2.12592	R-HSA-611105	M001	1	0	Reactome Gene Sets	6	Respiratory electron transport		-3.17712	4.80249	4.63248	28133	101	406	7	1.72414	0.646021	1329|1340|4724|4729|7381|9377|29796	COX5B|COX6B1|NDUFS4|NDUFV2|UQCRB|COX5A|UQCR10	-1.82294	0	9	0	0	-13.1088	10.0912
1	1	1	-2.15506	-7.3418	-9.49861	R-HSA-112315	M111	3	0	Reactome Gene Sets	6	Transmission across Chemical Synapses		-11.7757	6.15939	10.3081	28133	270	406	24	5.91133	1.17044	88|781|805|1175|1312|2786|4137|5577|5582|5879|6616|6714|6804|6812|8499|8541|9647|10383|10681|26960|59345|80331|84617|84790	ACTN2|CACNA2D1|CALM2|AP2S1|COMT|GNG4|MAPT|PRKAR2B|PRKCG|RAC1|SNAP25|SRC|STX1A|STXBP1|PPFIA2|PPFIA3|PPM1F|TUBB4B|GNB5|NBEA|GNB4|DNAJC5|TUBB6|TUBA1C	-8.985	0	10	1	1	-11.7757	12.8256
1	1	1	-2.00976	-6.21646	-9.36428	R-HSA-112316	M111	3	0	Reactome Gene Sets	6	Neuronal System		-11.6019	4.90122	9.62906	28133	410	406	29	7.14286	1.27815	88|781|805|1175|1312|2786|4137|5577|5582|5879|6616|6714|6804|6812|8499|8541|9369|9456|9647|10211|10313|10383|10681|26960|59345|80331|84617|84790|94030	ACTN2|CACNA2D1|CALM2|AP2S1|COMT|GNG4|MAPT|PRKAR2B|PRKCG|RAC1|SNAP25|SRC|STX1A|STXBP1|PPFIA2|PPFIA3|NRXN3|HOMER1|PPM1F|FLOT1|RTN3|TUBB4B|GNB5|NBEA|GNB4|DNAJC5|TUBB6|TUBA1C|LRRC4B	-8.82277	0	10	0	0	-11.7757	12.8256
0	1	1	0	-2.72188	-7.39936	R-HSA-442755	M011	2	0	Reactome Gene Sets	6	Activation of NMDA receptors and postsynaptic events		-7.39936	12.7222	9.9133	28133	93	214	9	4.20561	1.37207	88|805|4137|5879|6714|9647|26960|84617|84790	ACTN2|CALM2|MAPT|RAC1|SRC|PPM1F|NBEA|TUBB6|TUBA1C	-5.09735	0	10	0	0	-11.7757	12.8256
0	1	1	0	-4.65911	-5.37795	R-HSA-112314	M011	2	0	Reactome Gene Sets	6	Neurotransmitter receptors and postsynaptic signal transmission		-7.24954	5.40824	7.66539	28133	205	406	16	3.94089	0.965613	88|805|1175|2786|4137|5577|5582|5879|6714|9647|10383|10681|26960|59345|84617|84790	ACTN2|CALM2|AP2S1|GNG4|MAPT|PRKAR2B|PRKCG|RAC1|SRC|PPM1F|TUBB4B|GNB5|NBEA|GNB4|TUBB6|TUBA1C	-5.27802	0	10	0	0	-11.7757	12.8256
0	1	1	0	-2.96368	-5.57664	R-HSA-438064	M011	2	0	Reactome Gene Sets	6	Post NMDA receptor activation events		-5.63194	7.79547	7.36524	28133	80	406	9	2.21675	0.73068	88|805|4137|5577|5879|6714|10383|84617|84790	ACTN2|CALM2|MAPT|PRKAR2B|RAC1|SRC|TUBB4B|TUBB6|TUBA1C	-3.91786	0	10	0	0	-11.7757	12.8256
0	0	1	0	0	-3.57775	R-HSA-9609736	M001	1	0	Reactome Gene Sets	6	Assembly and cell surface presentation of NMDA receptors		-3.57775	12.8256	6.6341	28133	41	214	4	1.86916	0.925804	88|26960|84617|84790	ACTN2|NBEA|TUBB6|TUBA1C	-2.24904	0	10	0	0	-11.7757	12.8256
1	1	1	-3.87995	-8.8461	-6.09022	GO:0060627	M111	3	0	GO Biological Processes	19	regulation of vesicle-mediated transport	19_GO:0051179 localization	-11.5202	4.28216	9.26606	28133	534	406	33	8.12808	1.3562	88|348|408|1012|1020|1175|2244|3146|4035|5533|5582|5605|5879|5898|5962|6647|6714|6804|6812|7430|7447|7874|8499|10211|23122|29978|57118|60682|65009|84251|112755|140885|399687	ACTN2|APOE|ARRB1|CDH13|CDK5|AP2S1|FGB|HMGB1|LRP1|PPP3CC|PRKCG|MAP2K2|RAC1|RALA|RDX|SOD1|SRC|STX1A|STXBP1|EZR|VSNL1|USP7|PPFIA2|FLOT1|CLASP2|UBQLN2|CAMK1D|SMAP1|NDRG4|SGIP1|STX1B|SIRPA|MYO18A	-8.75235	0	11	1	1	-11.5202	10.6303
1	1	1	-2.05928	-4.44814	-5.67281	GO:0030100	M111	3	0	GO Biological Processes	19	regulation of endocytosis	19_GO:0051179 localization	-7.38563	4.61954	7.43174	28133	285	406	19	4.6798	1.0482	348|408|1012|1175|3146|4035|5533|5582|5879|6647|6714|10211|29978|57118|60682|84251|112755|140885|399687	APOE|ARRB1|CDH13|AP2S1|HMGB1|LRP1|PPP3CC|PRKCG|RAC1|SOD1|SRC|FLOT1|UBQLN2|CAMK1D|SMAP1|SGIP1|STX1B|SIRPA|MYO18A	-5.3789	0	11	0	0	-11.5202	10.6303
1	1	1	-2.32217	-3.63199	-2.1932	GO:0045807	M111	3	0	GO Biological Processes	19	positive regulation of endocytosis	19_GO:0048518 positive regulation of biological process	-4.09322	4.52896	5.2964	28133	153	406	10	2.46305	0.769234	348|408|4035|5533|6647|10211|57118|84251|140885|399687	APOE|ARRB1|LRP1|PPP3CC|SOD1|FLOT1|CAMK1D|SGIP1|SIRPA|MYO18A	-2.59577	0	11	0	0	-11.5202	10.6303
0	1	1	0	-2.65506	-3.05151	GO:0050764	M011	2	0	GO Biological Processes	19	regulation of phagocytosis	19_GO:0051179 localization	-3.28254	5.00053	4.77593	28133	97	406	7	1.72414	0.646021	3146|4035|5582|6647|57118|140885|399687	HMGB1|LRP1|PRKCG|SOD1|CAMK1D|SIRPA|MYO18A	-1.90862	0	11	0	0	-11.5202	10.6303
0	1	0	0	-3.25377	0	GO:0050766	M010	1	0	GO Biological Processes	19	positive regulation of phagocytosis	19_GO:0048518 positive regulation of biological process	-3.25377	10.6303	5.93102	28133	67	158	4	2.53165	1.2497	4035|6647|57118|399687	LRP1|SOD1|CAMK1D|MYO18A	-2.0128	0	11	0	0	-11.5202	10.6303
1	1	1	-4.01183	-8.63473	-5.2212	R-HSA-109582	M111	3	0	Reactome Gene Sets	6	Hemostasis		-10.437	3.79994	8.53077	28133	620	406	34	8.37438	1.37474	88|408|493|805|813|829|960|1020|1278|2244|2786|2817|3020|4282|4842|5138|5269|5478|5577|5582|5879|6520|6543|6647|6714|7450|7525|10383|10681|30845|59345|84617|84790|140885	ACTN2|ARRB1|ATP2B4|CALM2|CALU|CAPZA1|CD44|CDK5|COL1A2|FGB|GNG4|GPC1|H3-3A|MIF|NOS1|PDE2A|SERPINB6|PPIA|PRKAR2B|PRKCG|RAC1|SLC3A2|SLC8A2|SOD1|SRC|VWF|YES1|TUBB4B|GNB5|EHD3|GNB4|TUBB6|TUBA1C|SIRPA	-7.79408	0	12	1	1	-10.437	6.86745
1	1	1	-2.20202	-3.8989	-4.43985	R-HSA-76002	M111	3	0	Reactome Gene Sets	6	Platelet activation, signaling and aggregation		-5.12507	3.95208	5.82035	28133	263	406	15	3.69458	0.936149	88|408|805|813|1278|2244|2786|5478|5582|5879|6647|6714|7450|10681|59345	ACTN2|ARRB1|CALM2|CALU|COL1A2|FGB|GNG4|PPIA|PRKCG|RAC1|SOD1|SRC|VWF|GNB5|GNB4	-3.48133	0	12	0	0	-10.437	6.86745
0	0	1	0	0	-4.11084	R-HSA-76005	M001	1	0	Reactome Gene Sets	6	Response to elevated platelet cytosolic Ca2+		-4.11084	6.86745	5.96057	28133	134	214	7	3.27103	1.21594	88|805|813|5478|5582|6647|7450	ACTN2|CALM2|CALU|PPIA|PRKCG|SOD1|VWF	-2.64403	0	12	0	0	-10.437	6.86745
0	0	1	0	0	-3.32572	R-HSA-114608	M001	1	0	Reactome Gene Sets	6	Platelet degranulation		-3.32572	6.11454	5.0974	28133	129	214	6	2.80374	1.12846	88|805|813|5478|6647|7450	ACTN2|CALM2|CALU|PPIA|SOD1|VWF	-2.06684	0	12	0	0	-10.437	6.86745
0	1	1	0	-6.56844	-5.96292	R-HSA-5653656	M011	2	0	Reactome Gene Sets	6	Vesicle-mediated transport		-10.1008	3.60365	8.2728	28133	673	406	35	8.62069	1.39294	348|381|400|408|805|829|966|1175|1211|1212|1278|1778|1780|2873|4035|4644|5879|5898|6643|6714|7082|7314|8546|8774|10096|10226|10383|10525|11258|27342|29978|54732|84251|84617|84790	APOE|ARF5|ARL1|ARRB1|CALM2|CAPZA1|CD59|AP2S1|CLTA|CLTB|COL1A2|DYNC1H1|DYNC1I1|GPS1|LRP1|MYO5A|RAC1|RALA|SNX2|SRC|TJP1|UBB|AP3B1|NAPG|ACTR3|PLIN3|TUBB4B|HYOU1|DCTN3|RABGEF1|UBQLN2|TMED9|SGIP1|TUBB6|TUBA1C	-7.48227	0	13	1	1	-10.1008	3.60365
1	1	1	-2.14582	-4.83152	-5.09476	R-HSA-199991	M111	3	0	Reactome Gene Sets	6	Membrane Trafficking		-8.36588	3.38815	7.35969	28133	634	406	31	7.63547	1.31798	381|400|408|805|829|966|1175|1211|1212|1778|1780|2873|4644|5879|5898|6643|6714|7082|7314|8546|8774|10096|10226|10383|11258|27342|29978|54732|84251|84617|84790	ARF5|ARL1|ARRB1|CALM2|CAPZA1|CD59|AP2S1|CLTA|CLTB|DYNC1H1|DYNC1I1|GPS1|MYO5A|RAC1|RALA|SNX2|SRC|TJP1|UBB|AP3B1|NAPG|ACTR3|PLIN3|TUBB4B|DCTN3|RABGEF1|UBQLN2|TMED9|SGIP1|TUBB6|TUBA1C	-6.1437	0	13	0	0	-10.1008	3.60365
0	1	1	0	-3.3836	-9.99999	GO:0070201	M011	2	0	GO Biological Processes	19	regulation of establishment of protein localization	19_GO:0051179 localization	-10.0506	3.86977	8.39841	28133	573	406	32	7.88177	1.33728	291|293|348|637|952|1020|2039|2244|3728|4035|4137|4345|4924|5066|5208|5478|5533|5879|6616|6714|6804|7332|7430|7447|9647|10134|10155|10204|25874|29085|57506|399687	SLC25A4|SLC25A6|APOE|BID|CD38|CDK5|DMTN|FGB|JUP|LRP1|MAPT|CD200|NUCB1|PAM|PFKFB2|PPIA|PPP3CC|RAC1|SNAP25|SRC|STX1A|UBE2L3|EZR|VSNL1|PPM1F|BCAP31|TRIM28|NUTF2|MPC2|PHPT1|MAVS|MYO18A	-7.43987	0	14	1	1	-10.0506	18.7804
0	1	1	0	-3.69866	-8.35156	GO:0051223	M011	2	0	GO Biological Processes	19	regulation of protein transport	19_GO:0051179 localization	-9.02741	3.82034	7.90127	28133	526	406	29	7.14286	1.27815	291|293|348|952|1020|2039|2244|3728|4035|4345|4924|5066|5208|5478|5879|6616|6714|6804|7332|7430|7447|9647|10134|10155|10204|25874|29085|57506|399687	SLC25A4|SLC25A6|APOE|CD38|CDK5|DMTN|FGB|JUP|LRP1|CD200|NUCB1|PAM|PFKFB2|PPIA|RAC1|SNAP25|SRC|STX1A|UBE2L3|EZR|VSNL1|PPM1F|BCAP31|TRIM28|NUTF2|MPC2|PHPT1|MAVS|MYO18A	-6.65527	0	14	0	0	-10.0506	18.7804
0	1	1	0	-3.4869	-7.93474	GO:0090087	M011	2	0	GO Biological Processes	19	regulation of peptide transport	19_GO:0051179 localization	-8.464	3.60772	7.52203	28133	557	406	29	7.14286	1.27815	291|293|348|952|1020|2039|2244|3728|4035|4345|4924|5066|5208|5478|5879|6616|6714|6804|7332|7430|7447|9647|10134|10155|10204|25874|29085|57506|399687	SLC25A4|SLC25A6|APOE|CD38|CDK5|DMTN|FGB|JUP|LRP1|CD200|NUCB1|PAM|PFKFB2|PPIA|RAC1|SNAP25|SRC|STX1A|UBE2L3|EZR|VSNL1|PPM1F|BCAP31|TRIM28|NUTF2|MPC2|PHPT1|MAVS|MYO18A	-6.21495	0	14	0	0	-10.0506	18.7804
0	0	1	0	0	-8.37449	GO:0009306	M001	1	0	GO Biological Processes	19	protein secretion	19_GO:0051179 localization	-8.37449	6.04017	8.54418	28133	370	214	17	7.94393	1.84857	291|293|2039|4035|4345|5066|5208|5478|5879|6616|6623|6804|7430|7447|7857|25874|29085	SLC25A4|SLC25A6|DMTN|LRP1|CD200|PAM|PFKFB2|PPIA|RAC1|SNAP25|SNCG|STX1A|EZR|VSNL1|SCG2|MPC2|PHPT1	-5.77146	0	14	0	0	-10.0506	18.7804
0	0	1	0	0	-7.98994	GO:0023061	M001	1	0	GO Biological Processes	19	signal release	19_GO:0023052 signaling	-7.98994	5.32957	8.05081	28133	444	214	18	8.41121	1.89733	291|293|4035|5208|5582|5879|6616|6623|6804|7447|8499|8541|9900|25874|26059|29085|80331|112755	SLC25A4|SLC25A6|LRP1|PFKFB2|PRKCG|RAC1|SNAP25|SNCG|STX1A|VSNL1|PPFIA2|PPFIA3|SV2A|MPC2|ERC2|PHPT1|DNAJC5|STX1B	-5.53413	0	14	0	0	-10.0506	18.7804
0	0	1	0	0	-7.81	GO:0002790	M001	1	0	GO Biological Processes	19	peptide secretion	19_GO:0051179 localization	-7.81	5.53184	8.03259	28133	404	214	17	7.94393	1.84857	291|293|2039|4035|4345|5066|5208|5478|5879|6616|6623|6804|7430|7447|7857|25874|29085	SLC25A4|SLC25A6|DMTN|LRP1|CD200|PAM|PFKFB2|PPIA|RAC1|SNAP25|SNCG|STX1A|EZR|VSNL1|SCG2|MPC2|PHPT1	-5.39062	0	14	0	0	-10.0506	18.7804
0	1	1	0	-3.95036	-5.7639	GO:1904951	M011	2	0	GO Biological Processes	19	positive regulation of establishment of protein localization	19_GO:0048518 positive regulation of biological process	-7.72551	4.39624	7.52118	28133	331	406	21	5.17241	1.09913	637|952|1020|2244|3728|4035|5208|5478|5533|5879|6714|7332|7430|7447|10134|10155|10204|25874|29085|57506|399687	BID|CD38|CDK5|FGB|JUP|LRP1|PFKFB2|PPIA|PPP3CC|RAC1|SRC|UBE2L3|EZR|VSNL1|BCAP31|TRIM28|NUTF2|MPC2|PHPT1|MAVS|MYO18A	-5.64076	0	14	0	0	-10.0506	18.7804
0	1	1	0	-2.27466	-7.40521	GO:0050708	M011	2	0	GO Biological Processes	19	regulation of protein secretion	19_GO:0051179 localization	-7.40521	6.52651	8.16606	28133	282	214	14	6.54206	1.69028	291|293|4035|4345|5066|5208|5478|5879|6616|6804|7430|7447|25874|29085	SLC25A4|SLC25A6|LRP1|CD200|PAM|PFKFB2|PPIA|RAC1|SNAP25|STX1A|EZR|VSNL1|MPC2|PHPT1	-5.09735	0	14	0	0	-10.0506	18.7804
0	1	1	0	-4.35491	-4.77855	GO:0051222	M011	2	0	GO Biological Processes	19	positive regulation of protein transport	19_GO:0048518 positive regulation of biological process	-7.19542	4.49341	7.27379	28133	293	406	19	4.6798	1.0482	952|1020|2244|3728|4035|5208|5478|5879|6714|7332|7430|7447|10134|10155|10204|25874|29085|57506|399687	CD38|CDK5|FGB|JUP|LRP1|PFKFB2|PPIA|RAC1|SRC|UBE2L3|EZR|VSNL1|BCAP31|TRIM28|NUTF2|MPC2|PHPT1|MAVS|MYO18A	-5.23097	0	14	0	0	-10.0506	18.7804
0	1	1	0	-3.08425	-7.13674	GO:0051046	M011	2	0	GO Biological Processes	19	regulation of secretion	19_GO:0051179 localization	-7.13674	4.22031	7.11629	28133	623	214	20	9.34579	1.98973	291|293|358|4035|4345|5066|5208|5478|5582|5879|6616|6623|6804|7430|7447|8499|9900|25874|29085|112755	SLC25A4|SLC25A6|AQP1|LRP1|CD200|PAM|PFKFB2|PPIA|PRKCG|RAC1|SNAP25|SNCG|STX1A|EZR|VSNL1|PPFIA2|SV2A|MPC2|PHPT1|STX1B	-4.86179	0	14	0	0	-10.0506	18.7804
0	1	1	0	-2.0745	-6.88045	GO:0002791	M011	2	0	GO Biological Processes	19	regulation of peptide secretion	19_GO:0051179 localization	-6.88045	5.91793	7.63529	28133	311	214	14	6.54206	1.69028	291|293|4035|4345|5066|5208|5478|5879|6616|6804|7430|7447|25874|29085	SLC25A4|SLC25A6|LRP1|CD200|PAM|PFKFB2|PPIA|RAC1|SNAP25|STX1A|EZR|VSNL1|MPC2|PHPT1	-4.67793	0	14	0	0	-10.0506	18.7804
0	1	1	0	-2.85656	-6.42334	GO:1903530	M011	2	0	GO Biological Processes	19	regulation of secretion by cell	19_GO:0051179 localization	-6.59194	3.18871	6.35948	28133	565	406	26	6.40394	1.21504	291|293|348|952|1020|2244|4035|4345|5066|5208|5478|5582|5879|5898|6616|6623|6804|6812|7430|7447|8499|23122|25874|29085|112755|399687	SLC25A4|SLC25A6|APOE|CD38|CDK5|FGB|LRP1|CD200|PAM|PFKFB2|PPIA|PRKCG|RAC1|RALA|SNAP25|SNCG|STX1A|STXBP1|EZR|VSNL1|PPFIA2|CLASP2|MPC2|PHPT1|STX1B|MYO18A	-4.74089	0	14	0	0	-10.0506	18.7804
0	0	1	0	0	-5.92907	GO:0050796	M001	1	0	GO Biological Processes	19	regulation of insulin secretion	19_GO:0023052 signaling	-5.92907	7.38554	7.4823	28133	178	214	10	4.6729	1.44276	291|293|4035|5208|5879|6616|6804|7447|25874|29085	SLC25A4|SLC25A6|LRP1|PFKFB2|RAC1|SNAP25|STX1A|VSNL1|MPC2|PHPT1	-3.9321	0	14	0	0	-10.0506	18.7804
0	1	1	0	-2.81656	-4.71064	GO:0051047	M011	2	0	GO Biological Processes	19	positive regulation of secretion	19_GO:0048518 positive regulation of biological process	-5.73061	3.95296	6.20129	28133	298	406	17	4.18719	0.994055	358|952|1020|2244|4035|5208|5478|5879|6804|6812|7430|7447|23122|25874|29085|112755|399687	AQP1|CD38|CDK5|FGB|LRP1|PFKFB2|PPIA|RAC1|STX1A|STXBP1|EZR|VSNL1|CLASP2|MPC2|PHPT1|STX1B|MYO18A	-3.99598	0	14	0	0	-10.0506	18.7804
0	1	1	0	-3.09165	-4.38456	GO:1903532	M011	2	0	GO Biological Processes	19	positive regulation of secretion by cell	19_GO:0048518 positive regulation of biological process	-5.70382	4.1524	6.26283	28133	267	406	16	3.94089	0.965613	952|1020|2244|4035|5208|5478|5879|6804|6812|7430|7447|23122|25874|29085|112755|399687	CD38|CDK5|FGB|LRP1|PFKFB2|PPIA|RAC1|STX1A|STXBP1|EZR|VSNL1|CLASP2|MPC2|PHPT1|STX1B|MYO18A	-3.97432	0	14	0	0	-10.0506	18.7804
0	1	1	0	-2.16668	-5.06879	GO:0050714	M011	2	0	GO Biological Processes	19	positive regulation of protein secretion	19_GO:0048518 positive regulation of biological process	-5.41327	5.73101	6.61778	28133	133	406	11	2.70936	0.80576	952|2244|4035|5208|5478|5879|7430|7447|25874|29085|399687	CD38|FGB|LRP1|PFKFB2|PPIA|RAC1|EZR|VSNL1|MPC2|PHPT1|MYO18A	-3.73612	0	14	0	0	-10.0506	18.7804
0	0	1	0	0	-5.34055	GO:0030073	M001	1	0	GO Biological Processes	19	insulin secretion	19_GO:0023052 signaling	-5.34055	6.35085	6.76489	28133	207	214	10	4.6729	1.44276	291|293|4035|5208|5879|6616|6804|7447|25874|29085	SLC25A4|SLC25A6|LRP1|PFKFB2|RAC1|SNAP25|STX1A|VSNL1|MPC2|PHPT1	-3.49884	0	14	0	0	-10.0506	18.7804
0	0	1	0	0	-5.30357	GO:0090276	M001	1	0	GO Biological Processes	19	regulation of peptide hormone secretion	19_GO:0023052 signaling	-5.30357	6.29008	6.72053	28133	209	214	10	4.6729	1.44276	291|293|4035|5208|5879|6616|6804|7447|25874|29085	SLC25A4|SLC25A6|LRP1|PFKFB2|RAC1|SNAP25|STX1A|VSNL1|MPC2|PHPT1	-3.46711	0	14	0	0	-10.0506	18.7804
0	0	1	0	0	-5.18365	GO:0035774	M001	1	0	GO Biological Processes	19	positive regulation of insulin secretion involved in cellular response to glucose stimulus	19_GO:0048518 positive regulation of biological process	-5.18365	18.7804	9.21498	28133	35	214	5	2.33645	1.03261	4035|5879|7447|25874|29085	LRP1|RAC1|VSNL1|MPC2|PHPT1	-3.39177	0	14	0	0	-10.0506	18.7804
0	0	1	0	0	-4.60563	GO:0002793	M001	1	0	GO Biological Processes	19	positive regulation of peptide secretion	19_GO:0048518 positive regulation of biological process	-4.80423	4.94951	5.94702	28133	154	406	11	2.70936	0.80576	952|2244|4035|5208|5478|5879|7430|7447|25874|29085|399687	CD38|FGB|LRP1|PFKFB2|PPIA|RAC1|EZR|VSNL1|MPC2|PHPT1|MYO18A	-3.19967	0	14	0	0	-10.0506	18.7804
0	0	1	0	0	-4.76618	GO:0032024	M001	1	0	GO Biological Processes	19	positive regulation of insulin secretion	19_GO:0048518 positive regulation of biological process	-4.76618	11.1095	7.4672	28133	71	214	6	2.80374	1.12846	4035|5208|5879|7447|25874|29085	LRP1|PFKFB2|RAC1|VSNL1|MPC2|PHPT1	-3.08899	0	14	0	0	-10.0506	18.7804
0	0	1	0	0	-4.67175	GO:0030072	M001	1	0	GO Biological Processes	19	peptide hormone secretion	19_GO:0023052 signaling	-4.67175	5.32237	5.97358	28133	247	214	10	4.6729	1.44276	291|293|4035|5208|5879|6616|6804|7447|25874|29085	SLC25A4|SLC25A6|LRP1|PFKFB2|RAC1|SNAP25|STX1A|VSNL1|MPC2|PHPT1	-3.02549	0	14	0	0	-10.0506	18.7804
0	0	1	0	0	-4.38456	GO:0046883	M001	1	0	GO Biological Processes	19	regulation of hormone secretion	19_GO:0023052 signaling	-4.38456	4.92369	5.63989	28133	267	214	10	4.6729	1.44276	291|293|4035|5208|5879|6616|6804|7447|25874|29085	SLC25A4|SLC25A6|LRP1|PFKFB2|RAC1|SNAP25|STX1A|VSNL1|MPC2|PHPT1	-2.83723	0	14	0	0	-10.0506	18.7804
0	0	1	0	0	-4.04883	GO:0090277	M001	1	0	GO Biological Processes	19	positive regulation of peptide hormone secretion	19_GO:0048518 positive regulation of biological process	-4.1459	5.83521	5.71236	28133	95	406	8	1.97044	0.689759	952|2244|4035|5208|5879|7447|25874|29085	CD38|FGB|LRP1|PFKFB2|RAC1|VSNL1|MPC2|PHPT1	-2.63826	0	14	0	0	-10.0506	18.7804
0	0	1	0	0	-4.13211	GO:0061178	M001	1	0	GO Biological Processes	19	regulation of insulin secretion involved in cellular response to glucose stimulus	19_GO:0023052 signaling	-4.13211	11.5318	6.96835	28133	57	214	5	2.33645	1.03261	4035|5879|7447|25874|29085	LRP1|RAC1|VSNL1|MPC2|PHPT1	-2.65782	0	14	0	0	-10.0506	18.7804
0	0	1	0	0	-3.85952	GO:0046879	M001	1	0	GO Biological Processes	19	hormone secretion	19_GO:0023052 signaling	-3.85952	4.25445	5.03622	28133	309	214	10	4.6729	1.44276	291|293|4035|5208|5879|6616|6804|7447|25874|29085	SLC25A4|SLC25A6|LRP1|PFKFB2|RAC1|SNAP25|STX1A|VSNL1|MPC2|PHPT1	-2.45001	0	14	0	0	-10.0506	18.7804
0	0	1	0	0	-3.85844	GO:0035773	M001	1	0	GO Biological Processes	19	insulin secretion involved in cellular response to glucose stimulus	19_GO:0023052 signaling	-3.85844	10.1125	6.43941	28133	65	214	5	2.33645	1.03261	4035|5879|7447|25874|29085	LRP1|RAC1|VSNL1|MPC2|PHPT1	-2.4499	0	14	0	0	-10.0506	18.7804
0	0	1	0	0	-3.8531	GO:0034284	M001	1	0	GO Biological Processes	19	response to monosaccharide	19_GO:0050896 response to stimulus	-3.8531	5.33858	5.35003	28133	197	214	8	3.73832	1.29676	2185|2950|4035|5208|5879|7447|25874|29085	PTK2B|GSTP1|LRP1|PFKFB2|RAC1|VSNL1|MPC2|PHPT1	-2.4465	0	14	0	0	-10.0506	18.7804
0	0	1	0	0	-3.71492	GO:0009914	M001	1	0	GO Biological Processes	19	hormone transport	19_GO:0051179 localization	-3.71492	4.08269	4.87087	28133	322	214	10	4.6729	1.44276	291|293|4035|5208|5879|6616|6804|7447|25874|29085	SLC25A4|SLC25A6|LRP1|PFKFB2|RAC1|SNAP25|STX1A|VSNL1|MPC2|PHPT1	-2.34546	0	14	0	0	-10.0506	18.7804
0	0	1	0	0	-3.50093	GO:0009743	M001	1	0	GO Biological Processes	19	response to carbohydrate	19_GO:0050896 response to stimulus	-3.50093	4.73739	4.89457	28133	222	214	8	3.73832	1.29676	2185|2950|4035|5208|5879|7447|25874|29085	PTK2B|GSTP1|LRP1|PFKFB2|RAC1|VSNL1|MPC2|PHPT1	-2.19047	0	14	0	0	-10.0506	18.7804
0	0	1	0	0	-3.34368	GO:0046887	M001	1	0	GO Biological Processes	19	positive regulation of hormone secretion	19_GO:0048518 positive regulation of biological process	-3.34368	6.16231	5.12494	28133	128	214	6	2.80374	1.12846	4035|5208|5879|7447|25874|29085	LRP1|PFKFB2|RAC1|VSNL1|MPC2|PHPT1	-2.08054	0	14	0	0	-10.0506	18.7804
0	0	1	0	0	-3.23848	GO:0009749	M001	1	0	GO Biological Processes	19	response to glucose	19_GO:0050896 response to stimulus	-3.23848	4.94752	4.72901	28133	186	214	7	3.27103	1.21594	2185|4035|5208|5879|7447|25874|29085	PTK2B|LRP1|PFKFB2|RAC1|VSNL1|MPC2|PHPT1	-2.00212	0	14	0	0	-10.0506	18.7804
0	0	1	0	0	-3.17034	GO:0009746	M001	1	0	GO Biological Processes	19	response to hexose	19_GO:0050896 response to stimulus	-3.17034	4.818	4.63534	28133	191	214	7	3.27103	1.21594	2185|4035|5208|5879|7447|25874|29085	PTK2B|LRP1|PFKFB2|RAC1|VSNL1|MPC2|PHPT1	-1.95163	0	14	0	0	-10.0506	18.7804
0	0	1	0	0	-2.53679	GO:0010817	M001	1	0	GO Biological Processes	19	regulation of hormone levels	19_GO:0065007 biological regulation	-2.53679	2.6879	3.46082	28133	538	214	11	5.14019	1.50947	291|293|4035|5208|5879|5947|6616|6804|7447|25874|29085	SLC25A4|SLC25A6|LRP1|PFKFB2|RAC1|RBP1|SNAP25|STX1A|VSNL1|MPC2|PHPT1	-1.49069	0	14	0	0	-10.0506	18.7804
0	0	1	0	0	-2.52034	GO:0071333	M001	1	0	GO Biological Processes	19	cellular response to glucose stimulus	19_GO:0050896 response to stimulus	-2.52034	5.13526	4.10532	28133	128	214	5	2.33645	1.03261	4035|5879|7447|25874|29085	LRP1|RAC1|VSNL1|MPC2|PHPT1	-1.47846	0	14	0	0	-10.0506	18.7804
0	0	1	0	0	-2.49143	GO:0071331	M001	1	0	GO Biological Processes	19	cellular response to hexose stimulus	19_GO:0050896 response to stimulus	-2.49143	5.05625	4.05837	28133	130	214	5	2.33645	1.03261	4035|5879|7447|25874|29085	LRP1|RAC1|VSNL1|MPC2|PHPT1	-1.45495	0	14	0	0	-10.0506	18.7804
0	0	1	0	0	-2.47717	GO:0071326	M001	1	0	GO Biological Processes	19	cellular response to monosaccharide stimulus	19_GO:0050896 response to stimulus	-2.47717	5.01766	4.03526	28133	131	214	5	2.33645	1.03261	4035|5879|7447|25874|29085	LRP1|RAC1|VSNL1|MPC2|PHPT1	-1.4446	0	14	0	0	-10.0506	18.7804
0	0	1	0	0	-2.36762	GO:0071322	M001	1	0	GO Biological Processes	19	cellular response to carbohydrate stimulus	19_GO:0050896 response to stimulus	-2.36762	4.72887	3.85842	28133	139	214	5	2.33645	1.03261	4035|5879|7447|25874|29085	LRP1|RAC1|VSNL1|MPC2|PHPT1	-1.36018	0	14	0	0	-10.0506	18.7804
0	0	1	0	0	-2.27785	GO:0001678	M001	1	0	GO Biological Processes	19	cellular glucose homeostasis	19_GO:0065007 biological regulation	-2.27785	4.50214	3.71441	28133	146	214	5	2.33645	1.03261	4035|5879|7447|25874|29085	LRP1|RAC1|VSNL1|MPC2|PHPT1	-1.28983	0	14	0	0	-10.0506	18.7804
0	1	1	0	-3.49224	-7.51759	GO:1901699	M011	2	0	GO Biological Processes	19	cellular response to nitrogen compound	19_GO:0050896 response to stimulus	-9.89124	3.62456	8.19206	28133	650	406	34	8.37438	1.37474	88|353|358|445|478|493|534|781|1020|1278|2039|2875|2950|3728|4035|4062|4644|5138|5577|5591|5786|6647|6714|7430|7442|8396|9693|10211|51382|51520|51606|57506|201626|375790	ACTN2|APRT|AQP1|ASS1|ATP1A3|ATP2B4|ATP6V1G2|CACNA2D1|CDK5|COL1A2|DMTN|GPT|GSTP1|JUP|LRP1|LY6H|MYO5A|PDE2A|PRKAR2B|PRKDC|PTPRA|SOD1|SRC|EZR|TRPV1|PIP4K2B|RAPGEF2|FLOT1|ATP6V1D|LARS1|ATP6V1H|MAVS|PDE12|AGRN	-7.28821	0	15	1	1	-9.89124	3.62456
0	1	1	0	-3.91092	-5.55464	GO:0071417	M011	2	0	GO Biological Processes	19	cellular response to organonitrogen compound	19_GO:0050896 response to stimulus	-7.99066	3.43504	7.20197	28133	585	406	29	7.14286	1.27815	88|353|358|445|478|493|534|781|1020|1278|2039|2875|2950|3728|4035|4644|5138|5577|5591|5786|6647|6714|7430|7442|8396|9693|51382|51520|51606	ACTN2|APRT|AQP1|ASS1|ATP1A3|ATP2B4|ATP6V1G2|CACNA2D1|CDK5|COL1A2|DMTN|GPT|GSTP1|JUP|LRP1|MYO5A|PDE2A|PRKAR2B|PRKDC|PTPRA|SOD1|SRC|EZR|TRPV1|PIP4K2B|RAPGEF2|ATP6V1D|LARS1|ATP6V1H	-5.84394	0	15	0	0	-9.89124	3.62456
1	1	1	-2.55516	-2.85715	-2.28718	GO:0032870	M111	3	0	GO Biological Processes	19	cellular response to hormone stimulus	19_GO:0050896 response to stimulus	-6.2761	2.9176	6.05575	28133	665	406	28	6.89655	1.25758	88|353|358|445|478|493|534|2235|2244|2875|2950|3371|4062|4644|5577|5591|5786|5962|6714|7332|8396|11240|11331|11335|51382|51606|55915|375790	ACTN2|APRT|AQP1|ASS1|ATP1A3|ATP2B4|ATP6V1G2|FECH|FGB|GPT|GSTP1|TNC|LY6H|MYO5A|PRKAR2B|PRKDC|PTPRA|RDX|SRC|UBE2L3|PIP4K2B|PADI2|PHB2|CBX3|ATP6V1D|ATP6V1H|LANCL2|AGRN	-4.46374	0	15	0	0	-9.89124	3.62456
0	1	1	0	-2.7324	-2.4595	GO:1901653	M011	2	0	GO Biological Processes	19	cellular response to peptide	19_GO:0050896 response to stimulus	-4.67048	3.14969	5.21321	28133	396	406	18	4.4335	1.02156	88|353|445|478|534|781|1020|2875|2950|4035|4644|5577|5591|5786|6714|8396|51382|51606	ACTN2|APRT|ASS1|ATP1A3|ATP6V1G2|CACNA2D1|CDK5|GPT|GSTP1|LRP1|MYO5A|PRKAR2B|PRKDC|PTPRA|SRC|PIP4K2B|ATP6V1D|ATP6V1H	-3.08828	0	15	0	0	-9.89124	3.62456
0	1	1	0	-2.00161	-2.6115	GO:1901652	M011	2	0	GO Biological Processes	19	response to peptide	19_GO:0050896 response to stimulus	-4.50899	2.76645	4.94877	28133	526	406	21	5.17241	1.09913	88|353|445|478|534|781|1020|2875|2950|4035|4644|5577|5591|5786|6714|8396|8826|27101|51382|51606|54832	ACTN2|APRT|ASS1|ATP1A3|ATP6V1G2|CACNA2D1|CDK5|GPT|GSTP1|LRP1|MYO5A|PRKAR2B|PRKDC|PTPRA|SRC|PIP4K2B|IQGAP1|CACYBP|ATP6V1D|ATP6V1H|VPS13C	-2.94596	0	15	0	0	-9.89124	3.62456
0	0	1	0	0	-2.18534	GO:0043434	M001	1	0	GO Biological Processes	19	response to peptide hormone	19_GO:0050896 response to stimulus	-3.62743	2.69561	4.32286	28133	437	406	17	4.18719	0.994055	88|353|445|534|2875|2950|4644|5577|5591|5786|6714|8396|8826|27101|51382|51606|54832	ACTN2|APRT|ASS1|ATP6V1G2|GPT|GSTP1|MYO5A|PRKAR2B|PRKDC|PTPRA|SRC|PIP4K2B|IQGAP1|CACYBP|ATP6V1D|ATP6V1H|VPS13C	-2.20353	0	15	0	0	-9.89124	3.62456
0	0	1	0	0	-2.08702	GO:0032869	M001	1	0	GO Biological Processes	19	cellular response to insulin stimulus	19_GO:0050896 response to stimulus	-3.28808	3.34309	4.2986	28133	228	406	11	2.70936	0.80576	353|534|2875|2950|4644|5591|5786|6714|8396|51382|51606	APRT|ATP6V1G2|GPT|GSTP1|MYO5A|PRKDC|PTPRA|SRC|PIP4K2B|ATP6V1D|ATP6V1H	-1.9137	0	15	0	0	-9.89124	3.62456
0	0	1	0	0	-2.23669	GO:0032868	M001	1	0	GO Biological Processes	19	response to insulin	19_GO:0050896 response to stimulus	-3.07986	2.9697	4.00826	28133	280	406	12	2.95567	0.840523	353|534|2875|2950|4644|5591|5786|6714|8396|51382|51606|54832	APRT|ATP6V1G2|GPT|GSTP1|MYO5A|PRKDC|PTPRA|SRC|PIP4K2B|ATP6V1D|ATP6V1H|VPS13C	-1.73965	0	15	0	0	-9.89124	3.62456
0	1	1	0	-7.59783	-6.47097	R-HSA-373760	M011	2	0	Reactome Gene Sets	6	L1CAM interactions		-9.69753	8.73442	10.2312	28133	119	406	15	3.69458	0.936149	214|1175|1211|2596|5605|5879|5962|6714|7430|10383|10752|11313|23114|84617|84790	ALCAM|AP2S1|CLTA|GAP43|MAP2K2|RAC1|RDX|SRC|EZR|TUBB4B|CHL1|LYPLA2|NFASC|TUBB6|TUBA1C	-7.13102	0	16	1	1	-9.69753	20.541
1	1	1	-2.18	-6.31147	-2.73131	hsa04145	M111	3	0	KEGG Pathway	24	Phagosome		-6.76844	5.77443	7.5107	28133	168	406	14	3.44828	0.905562	534|1778|1780|2775|4842|5879|8411|10383|23541|51382|51606|84617|84790|203068	ATP6V1G2|DYNC1H1|DYNC1I1|GNAO1|NOS1|RAC1|EEA1|TUBB4B|SEC14L2|ATP6V1D|ATP6V1H|TUBB6|TUBA1C|TUBB	-4.89384	0	16	0	0	-9.69753	20.541
0	1	1	0	-4.63288	-2.97256	R-HSA-6807878	M011	2	0	Reactome Gene Sets	6	COPI-mediated anterograde transport		-6.60993	7.54677	7.97577	28133	101	406	11	2.70936	0.80576	381|829|966|1778|1780|8774|10383|11258|54732|84617|84790	ARF5|CAPZA1|CD59|DYNC1H1|DYNC1I1|NAPG|TUBB4B|DCTN3|TMED9|TUBB6|TUBA1C	-4.75618	0	16	0	0	-9.69753	20.541
0	1	1	0	-2.62871	-4.54143	R-HSA-437239	M011	2	0	Reactome Gene Sets	6	Recycling pathway of L1		-6.47153	11.7946	8.96234	28133	47	406	8	1.97044	0.689759	1175|1211|5962|6714|7430|10383|84617|84790	AP2S1|CLTA|RDX|SRC|EZR|TUBB4B|TUBB6|TUBA1C	-4.64154	0	16	0	0	-9.69753	20.541
0	0	1	0	0	-5.54018	R-HSA-9663891	M001	1	0	Reactome Gene Sets	6	Selective autophagy		-5.5863	7.69923	7.3063	28133	81	406	9	2.21675	0.73068	1778|1780|6714|7314|9868|10226|10383|84617|84790	DYNC1H1|DYNC1I1|SRC|UBB|TOMM70|PLIN3|TUBB4B|TUBB6|TUBA1C	-3.88157	0	16	0	0	-9.69753	20.541
0	1	1	0	-4.56155	-2.92368	ko04145	M011	2	0	KEGG Pathway	24	Phagosome		-5.57939	5.39946	6.62454	28133	154	406	12	2.95567	0.840523	534|1778|1780|4842|5879|8411|10383|51382|51606|84617|84790|203068	ATP6V1G2|DYNC1H1|DYNC1I1|NOS1|RAC1|EEA1|TUBB4B|ATP6V1D|ATP6V1H|TUBB6|TUBA1C|TUBB	-3.87563	0	16	0	0	-9.69753	20.541
1	1	1	-3.42302	-3.11641	-5.38298	R-HSA-5626467	M111	3	0	Reactome Gene Sets	6	RHO GTPases activate IQGAPs		-5.38298	20.541	9.6832	28133	32	214	5	2.33645	1.03261	805|5879|8826|84617|84790	CALM2|RAC1|IQGAP1|TUBB6|TUBA1C	-3.5265	0	16	0	0	-9.69753	20.541
0	0	1	0	0	-4.45227	R-HSA-157858	M001	1	0	Reactome Gene Sets	6	Gap junction trafficking and regulation		-5.20011	9.89901	7.54436	28133	49	406	7	1.72414	0.646021	1211|1212|6714|7082|10383|84617|84790	CLTA|CLTB|SRC|TJP1|TUBB4B|TUBB6|TUBA1C	-3.54877	0	16	0	0	-9.69753	20.541
0	1	1	0	-3.71027	-3.21123	R-HSA-6811436	M011	2	0	Reactome Gene Sets	6	COPI-independent Golgi-to-ER retrograde traffic		-5.08126	9.51082	7.3613	28133	51	406	7	1.72414	0.646021	829|1778|1780|10383|11258|84617|84790	CAPZA1|DYNC1H1|DYNC1I1|TUBB4B|DCTN3|TUBB6|TUBA1C	-3.44592	0	16	0	0	-9.69753	20.541
0	1	1	0	-2.08963	-4.90555	R-HSA-5663220	M011	2	0	Reactome Gene Sets	6	RHO GTPases Activate Formins		-4.90555	7.51215	6.76271	28133	140	214	8	3.73832	1.29676	1778|1780|5217|5879|6714|22919|84617|84790	DYNC1H1|DYNC1I1|PFN2|RAC1|SRC|MAPRE1|TUBB6|TUBA1C	-3.18812	0	16	0	0	-9.69753	20.541
0	1	1	0	-3.58277	-3.08646	R-HSA-3371497	M011	2	0	Reactome Gene Sets	6	HSP90 chaperone cycle for steroid hormone receptors (SHR)		-4.85905	8.81912	7.02374	28133	55	406	7	1.72414	0.646021	829|1778|1780|10383|11258|84617|84790	CAPZA1|DYNC1H1|DYNC1I1|TUBB4B|DCTN3|TUBB6|TUBA1C	-3.24988	0	16	0	0	-9.69753	20.541
0	1	1	0	-3.61673	-2.1815	R-HSA-199977	M011	2	0	Reactome Gene Sets	6	ER to Golgi Anterograde Transport		-4.80423	4.94951	5.94702	28133	154	406	11	2.70936	0.80576	381|829|966|1778|1780|8774|10383|11258|54732|84617|84790	ARF5|CAPZA1|CD59|DYNC1H1|DYNC1I1|NAPG|TUBB4B|DCTN3|TMED9|TUBB6|TUBA1C	-3.19967	0	16	0	0	-9.69753	20.541
0	0	1	0	0	-4.73307	R-HSA-9646399	M001	1	0	Reactome Gene Sets	6	Aggrephagy		-4.73307	15.2864	8.20799	28133	43	214	5	2.33645	1.03261	1778|1780|7314|84617|84790	DYNC1H1|DYNC1I1|UBB|TUBB6|TUBA1C	-3.06964	0	16	0	0	-9.69753	20.541
0	0	1	0	0	-4.66716	R-HSA-9612973	M001	1	0	Reactome Gene Sets	6	Autophagy		-4.66716	6.96491	6.43443	28133	151	214	8	3.73832	1.29676	1778|1780|2670|6714|7314|10226|84617|84790	DYNC1H1|DYNC1I1|GFAP|SRC|UBB|PLIN3|TUBB6|TUBA1C	-3.02426	0	16	0	0	-9.69753	20.541
0	1	1	0	-3.0242	-2.44904	R-HSA-8856688	M011	2	0	Reactome Gene Sets	6	Golgi-to-ER retrograde transport		-4.61118	5.21001	5.889	28133	133	406	10	2.46305	0.769234	381|829|1778|1780|8774|10383|11258|54732|84617|84790	ARF5|CAPZA1|DYNC1H1|DYNC1I1|NAPG|TUBB4B|DCTN3|TMED9|TUBB6|TUBA1C	-3.03475	0	16	0	0	-9.69753	20.541
1	0	1	-2.6232	0	-2.94404	hsa05130	M101	2	0	KEGG Pathway	24	Pathogenic Escherichia coli infection		-4.60645	8.0842	6.64712	28133	60	406	7	1.72414	0.646021	7430|10095|10383|80331|84617|84790|203068	EZR|ARPC1B|TUBB4B|DNAJC5|TUBB6|TUBA1C|TUBB	-3.03287	0	16	0	0	-9.69753	20.541
0	1	1	0	-3.47299	-2.04964	R-HSA-446203	M011	2	0	Reactome Gene Sets	6	Asparagine N-linked glycosylation		-4.38878	3.41907	5.13154	28133	304	406	15	3.69458	0.936149	381|829|966|1778|1780|5700|7264|7314|8774|10383|11258|54187|54732|84617|84790	ARF5|CAPZA1|CD59|DYNC1H1|DYNC1I1|PSMC1|GFUS|UBB|NAPG|TUBB4B|DCTN3|NANS|TMED9|TUBB6|TUBA1C	-2.84413	0	16	0	0	-9.69753	20.541
0	1	1	0	-2.23901	-3.02782	R-HSA-6811442	M011	2	0	Reactome Gene Sets	6	Intra-Golgi and retrograde Golgi-to-ER traffic		-4.38791	4.11642	5.37899	28133	202	406	12	2.95567	0.840523	381|400|829|1778|1780|8774|10226|10383|11258|54732|84617|84790	ARF5|ARL1|CAPZA1|DYNC1H1|DYNC1I1|NAPG|PLIN3|TUBB4B|DCTN3|TMED9|TUBB6|TUBA1C	-2.84391	0	16	0	0	-9.69753	20.541
0	0	1	0	0	-2.33609	ko04540	M001	1	0	KEGG Pathway	24	Gap junction		-4.38458	6.29937	6.0249	28133	88	406	8	1.97044	0.689759	5582|5605|6714|7082|10383|84617|84790|203068	PRKCG|MAP2K2|SRC|TJP1|TUBB4B|TUBB6|TUBA1C|TUBB	-2.84192	0	16	0	0	-9.69753	20.541
0	0	1	0	0	-2.30147	hsa04540	M001	1	0	KEGG Pathway	24	Gap junction		-4.31412	6.15939	5.93224	28133	90	406	8	1.97044	0.689759	5582|5605|6714|7082|10383|84617|84790|203068	PRKCG|MAP2K2|SRC|TJP1|TUBB4B|TUBB6|TUBA1C|TUBB	-2.77999	0	16	0	0	-9.69753	20.541
0	0	1	0	0	-4.17654	R-HSA-9619483	M001	1	0	Reactome Gene Sets	6	Activation of AMPK downstream of NMDARs		-4.26349	11.9471	7.13716	28133	29	406	5	1.23153	0.547354	805|4137|10383|84617|84790	CALM2|MAPT|TUBB4B|TUBB6|TUBA1C	-2.7376	0	16	0	0	-9.69753	20.541
0	1	1	0	-3.17718	-2.59506	R-HSA-2132295	M011	2	0	Reactome Gene Sets	6	MHC class II antigen presentation		-4.11431	5.07023	5.47427	28133	123	406	9	2.21675	0.73068	829|1175|1211|1778|1780|10383|11258|84617|84790	CAPZA1|AP2S1|CLTA|DYNC1H1|DYNC1I1|TUBB4B|DCTN3|TUBB6|TUBA1C	-2.61455	0	16	0	0	-9.69753	20.541
1	1	1	-3.53254	-3.13537	-2.65058	R-HSA-1445148	M111	3	0	Reactome Gene Sets	6	Translocation of SLC2A4 (GLUT4) to the plasma membrane		-4.08943	6.73683	5.89791	28133	72	406	7	1.72414	0.646021	805|4644|5879|5898|10383|84617|84790	CALM2|MYO5A|RAC1|RALA|TUBB4B|TUBB6|TUBA1C	-2.59504	0	16	0	0	-9.69753	20.541
0	1	0	0	-3.19332	0	R-HSA-948021	M010	1	0	Reactome Gene Sets	6	Transport to the Golgi and subsequent modification		-4.07337	4.12013	5.15223	28133	185	406	11	2.70936	0.80576	381|829|966|1778|1780|8774|10383|11258|54732|84617|84790	ARF5|CAPZA1|CD59|DYNC1H1|DYNC1I1|NAPG|TUBB4B|DCTN3|TMED9|TUBB6|TUBA1C	-2.58193	0	16	0	0	-9.69753	20.541
0	0	1	0	0	-4.07032	R-HSA-1632852	M001	1	0	Reactome Gene Sets	6	Macroautophagy		-4.07032	6.76646	5.90174	28133	136	214	7	3.27103	1.21594	1778|1780|6714|7314|10226|84617|84790	DYNC1H1|DYNC1I1|SRC|UBB|PLIN3|TUBB6|TUBA1C	-2.61014	0	16	0	0	-9.69753	20.541
1	0	1	-2.73165	0	-2.06983	WP2272	M101	2	0	WikiPathways	27	Pathogenic Escherichia coli infection		-3.85729	7.55925	5.89202	28133	55	406	6	1.47783	0.598848	7430|10095|10383|84617|84790|203068	EZR|ARPC1B|TUBB4B|TUBB6|TUBA1C|TUBB	-2.39711	0	16	0	0	-9.69753	20.541
1	0	1	-2.73165	0	-2.06983	ko05130	M101	2	0	KEGG Pathway	24	Pathogenic Escherichia coli infection		-3.85729	7.55925	5.89202	28133	55	406	6	1.47783	0.598848	7430|10095|10383|84617|84790|203068	EZR|ARPC1B|TUBB4B|TUBB6|TUBA1C|TUBB	-2.39711	0	16	0	0	-9.69753	20.541
0	0	1	0	0	-3.34739	R-HSA-190828	M001	1	0	Reactome Gene Sets	6	Gap junction trafficking		-3.34739	11.1883	6.12017	28133	47	214	4	1.86916	0.925804	1211|1212|84617|84790	CLTA|CLTB|TUBB6|TUBA1C	-2.08267	0	16	0	0	-9.69753	20.541
0	0	1	0	0	-2.90812	R-HSA-389957	M001	1	0	Reactome Gene Sets	6	Prefoldin mediated transfer of substrate to CCT/TriC		-3.17709	9.89901	5.70087	28133	28	406	4	0.985222	0.490178	7411|10383|84617|84790	VBP1|TUBB4B|TUBB6|TUBA1C	-1.82294	0	16	0	0	-9.69753	20.541
0	0	1	0	0	-2.73769	R-HSA-389958	M001	1	0	Reactome Gene Sets	6	Cooperation of Prefoldin and TriC/CCT in actin and tubulin folding		-2.95223	8.66164	5.24744	28133	32	406	4	0.985222	0.490178	7411|10383|84617|84790	VBP1|TUBB4B|TUBB6|TUBA1C	-1.63155	0	16	0	0	-9.69753	20.541
0	0	1	0	0	-2.68963	R-HSA-9648025	M001	1	0	Reactome Gene Sets	6	EML4 and NUDC in mitotic spindle formation		-2.80228	4.14574	4.12596	28133	117	406	7	1.72414	0.646021	1778|1780|10383|22919|23122|84617|84790	DYNC1H1|DYNC1I1|TUBB4B|MAPRE1|CLASP2|TUBB6|TUBA1C	-1.50256	0	16	0	0	-9.69753	20.541
0	0	1	0	0	-2.54981	R-HSA-2500257	M001	1	0	Reactome Gene Sets	6	Resolution of Sister Chromatid Cohesion		-2.61894	3.84962	3.87927	28133	126	406	7	1.72414	0.646021	1778|1780|10383|22919|23122|84617|84790	DYNC1H1|DYNC1I1|TUBB4B|MAPRE1|CLASP2|TUBB6|TUBA1C	-1.34389	0	16	0	0	-9.69753	20.541
0	1	1	0	-2.14419	-2.42142	R-HSA-9609690	M011	2	0	Reactome Gene Sets	6	HCMV Early Events		-2.45182	3.59298	3.65438	28133	135	406	7	1.72414	0.646021	1778|1780|8359|10155|10383|84617|84790	DYNC1H1|DYNC1I1|H4C1|TRIM28|TUBB4B|TUBB6|TUBA1C	-1.20047	0	16	0	0	-9.69753	20.541
0	0	1	0	0	-2.11319	R-HSA-9609646	M001	1	0	Reactome Gene Sets	6	HCMV Infection		-2.11319	4.10821	3.4519	28133	160	214	5	2.33645	1.03261	1778|1780|8359|84617|84790	DYNC1H1|DYNC1I1|H4C1|TUBB6|TUBA1C	-1.16641	0	16	0	0	-9.69753	20.541
1	1	1	-2.95628	-7.03545	-5.70316	GO:0009611	M111	3	0	GO Biological Processes	19	response to wounding	19_GO:0050896 response to stimulus	-9.62468	3.45971	7.98043	28133	701	406	35	8.62069	1.39294	348|408|829|954|960|966|1020|1278|1465|2039|2244|2596|2934|3020|3146|3371|3691|4035|5339|5478|5577|5582|5879|6647|6714|6812|7143|7450|8546|10752|11331|23122|23499|25828|30845	APOE|ARRB1|CAPZA1|ENTPD2|CD44|CD59|CDK5|COL1A2|CSRP1|DMTN|FGB|GAP43|GSN|H3-3A|HMGB1|TNC|ITGB4|LRP1|PLEC|PPIA|PRKAR2B|PRKCG|RAC1|SOD1|SRC|STXBP1|TNR|VWF|AP3B1|CHL1|PHB2|CLASP2|MACF1|TXN2|EHD3	-7.08367	0	17	1	1	-9.62468	5.64014
0	1	1	0	-5.20669	-4.31869	GO:0042060	M011	2	0	GO Biological Processes	19	wound healing	19_GO:0050896 response to stimulus	-6.82021	3.18725	6.48036	28133	587	406	27	6.65025	1.23655	348|408|829|954|960|966|1278|1465|2039|2244|2596|2934|3020|3146|3371|5339|5478|5577|5582|5879|6714|6812|7450|8546|23122|23499|30845	APOE|ARRB1|CAPZA1|ENTPD2|CD44|CD59|COL1A2|CSRP1|DMTN|FGB|GAP43|GSN|H3-3A|HMGB1|TNC|PLEC|PPIA|PRKAR2B|PRKCG|RAC1|SRC|STXBP1|VWF|AP3B1|CLASP2|MACF1|EHD3	-4.93407	0	17	0	0	-9.62468	5.64014
0	1	1	0	-4.58772	-3.49643	GO:0007596	M011	2	0	GO Biological Processes	19	blood coagulation	19_GO:0032501 multicellular organismal process	-6.14211	3.83839	6.40011	28133	343	406	19	4.6798	1.0482	348|408|829|954|966|1278|1465|2039|2244|3020|5478|5577|5582|5879|6714|6812|7450|8546|30845	APOE|ARRB1|CAPZA1|ENTPD2|CD59|COL1A2|CSRP1|DMTN|FGB|H3-3A|PPIA|PRKAR2B|PRKCG|RAC1|SRC|STXBP1|VWF|AP3B1|EHD3	-4.35491	0	17	0	0	-9.62468	5.64014
0	1	1	0	-4.54499	-3.45677	GO:0007599	M011	2	0	GO Biological Processes	19	hemostasis	19_GO:0065007 biological regulation	-6.06666	3.79415	6.33743	28133	347	406	19	4.6798	1.0482	348|408|829|954|966|1278|1465|2039|2244|3020|5478|5577|5582|5879|6714|6812|7450|8546|30845	APOE|ARRB1|CAPZA1|ENTPD2|CD59|COL1A2|CSRP1|DMTN|FGB|H3-3A|PPIA|PRKAR2B|PRKCG|RAC1|SRC|STXBP1|VWF|AP3B1|EHD3	-4.28867	0	17	0	0	-9.62468	5.64014
0	1	1	0	-4.5344	-3.44695	GO:0050817	M011	2	0	GO Biological Processes	19	coagulation	19_GO:0032501 multicellular organismal process	-6.04797	3.78324	6.3219	28133	348	406	19	4.6798	1.0482	348|408|829|954|966|1278|1465|2039|2244|3020|5478|5577|5582|5879|6714|6812|7450|8546|30845	APOE|ARRB1|CAPZA1|ENTPD2|CD59|COL1A2|CSRP1|DMTN|FGB|H3-3A|PPIA|PRKAR2B|PRKCG|RAC1|SRC|STXBP1|VWF|AP3B1|EHD3	-4.27227	0	17	0	0	-9.62468	5.64014
0	1	1	0	-3.84413	-3.83593	GO:0050878	M011	2	0	GO Biological Processes	19	regulation of body fluid levels	19_GO:0065007 biological regulation	-5.80641	3.14969	5.90467	28133	506	406	23	5.66502	1.14729	348|353|358|408|829|954|966|1278|1465|2039|2244|3020|3925|5066|5478|5577|5582|5879|6714|6812|7450|8546|30845	APOE|APRT|AQP1|ARRB1|CAPZA1|ENTPD2|CD59|COL1A2|CSRP1|DMTN|FGB|H3-3A|STMN1|PAM|PPIA|PRKAR2B|PRKCG|RAC1|SRC|STXBP1|VWF|AP3B1|EHD3	-4.05816	0	17	0	0	-9.62468	5.64014
0	0	1	0	0	-4.52573	GO:0030168	M001	1	0	GO Biological Processes	19	platelet activation	19_GO:0032501 multicellular organismal process	-5.46323	5.26277	6.502	28133	158	406	12	2.95567	0.840523	348|408|954|1278|1465|2039|2244|5478|5582|6714|6812|7450	APOE|ARRB1|ENTPD2|COL1A2|CSRP1|DMTN|FGB|PPIA|PRKCG|SRC|STXBP1|VWF	-3.77919	0	17	0	0	-9.62468	5.64014
0	1	0	0	-2.847	0	GO:0034109	M010	1	0	GO Biological Processes	19	homotypic cell-cell adhesion	19_GO:0022610 biological adhesion	-3.60237	5.64014	5.21493	28133	86	406	7	1.72414	0.646021	1465|2039|2244|3728|5478|5962|6812	CSRP1|DMTN|FGB|JUP|PPIA|RDX|STXBP1	-2.18045	0	17	0	0	-9.62468	5.64014
1	1	1	-3.15009	-3.08481	-8.12718	WP3888	M111	3	0	WikiPathways	27	VEGFA-VEGFR2 Signaling Pathway		-9.55898	4.30095	8.39598	28133	435	406	27	6.65025	1.23655	102|781|813|1175|1465|2185|2244|2317|2817|3146|4629|4860|5605|5710|5879|5954|6714|7170|7430|8402|8411|8575|8826|9588|10525|83442|84790	ADAM10|CACNA2D1|CALU|AP2S1|CSRP1|PTK2B|FGB|FLNB|GPC1|HMGB1|MYH11|PNP|MAP2K2|PSMD4|RAC1|RCN1|SRC|TPM3|EZR|SLC25A11|EEA1|PRKRA|IQGAP1|PRDX6|HYOU1|SH3BGRL3|TUBA1C	-7.03259	0	18	1	1	-9.55898	4.30095
1	1	1	-2.62851	-4.65109	-4.75209	GO:0050808	M111	3	0	GO Biological Processes	19	synapse organization	19_GO:0071840 cellular component organization or biogenesis	-9.40146	4.38351	8.36156	28133	411	406	26	6.40394	1.21504	102|348|1000|1020|1627|2339|2596|3371|4137|5064|5300|6543|6623|7143|7402|8499|8541|9456|23114|23654|26059|55737|79012|94030|203068|375790	ADAM10|APOE|CDH2|CDK5|DBN1|FNTA|GAP43|TNC|MAPT|PALM|PIN1|SLC8A2|SNCG|TNR|UTRN|PPFIA2|PPFIA3|HOMER1|NFASC|PLXNB2|ERC2|VPS35|CAMKV|LRRC4B|TUBB|AGRN	-6.90588	0	19	1	1	-9.40146	6.0917
0	1	1	0	-3.55711	-2.78069	GO:0050803	M011	2	0	GO Biological Processes	19	regulation of synapse structure or activity	19_GO:0065007 biological regulation	-5.29643	4.35024	6.07799	28133	223	406	14	3.44828	0.905562	102|348|1000|1020|1627|2596|8499|9456|55737|79012|94030|112755|203068|375790	ADAM10|APOE|CDH2|CDK5|DBN1|GAP43|PPFIA2|HOMER1|VPS35|CAMKV|LRRC4B|STX1B|TUBB|AGRN	-3.63737	0	19	0	0	-9.40146	6.0917
0	1	1	0	-3.67832	-2.22606	GO:0050807	M011	2	0	GO Biological Processes	19	regulation of synapse organization	19_GO:0071840 cellular component organization or biogenesis	-4.82942	4.22916	5.72444	28133	213	406	13	3.20197	0.873733	102|348|1000|1020|1627|2596|8499|9456|55737|79012|94030|203068|375790	ADAM10|APOE|CDH2|CDK5|DBN1|GAP43|PPFIA2|HOMER1|VPS35|CAMKV|LRRC4B|TUBB|AGRN	-3.22179	0	19	0	0	-9.40146	6.0917
0	1	0	0	-4.43798	0	GO:0099173	M010	1	0	GO Biological Processes	19	postsynapse organization	19_GO:0071840 cellular component organization or biogenesis	-4.62379	4.73431	5.75008	28133	161	406	11	2.70936	0.80576	102|348|1000|1020|1627|2339|2596|8499|9456|55737|94030	ADAM10|APOE|CDH2|CDK5|DBN1|FNTA|GAP43|PPFIA2|HOMER1|VPS35|LRRC4B	-3.04664	0	19	0	0	-9.40146	6.0917
0	1	0	0	-3.78183	0	GO:0106027	M010	1	0	GO Biological Processes	19	neuron projection organization	19_GO:0071840 cellular component organization or biogenesis	-4.27959	6.0917	5.88696	28133	91	406	8	1.97044	0.689759	102|348|478|1020|1627|8499|9456|55737	ADAM10|APOE|ATP1A3|CDK5|DBN1|PPFIA2|HOMER1|VPS35	-2.75063	0	19	0	0	-9.40146	6.0917
0	1	0	0	-2.92373	0	GO:0097061	M010	1	0	GO Biological Processes	19	dendritic spine organization	19_GO:0071840 cellular component organization or biogenesis	-3.73123	5.91526	5.39376	28133	82	406	7	1.72414	0.646021	102|348|1020|1627|8499|9456|55737	ADAM10|APOE|CDK5|DBN1|PPFIA2|HOMER1|VPS35	-2.29245	0	19	0	0	-9.40146	6.0917
1	1	0	-2.37319	-2.81792	0	GO:0050773	M110	2	0	GO Biological Processes	19	regulation of dendrite development	19_GO:0032502 developmental process	-3.50546	4.21377	4.74346	28133	148	406	9	2.21675	0.73068	102|348|1020|1627|8499|8826|9693|23043|57118	ADAM10|APOE|CDK5|DBN1|PPFIA2|IQGAP1|RAPGEF2|TNIK|CAMK1D	-2.0974	0	19	0	0	-9.40146	6.0917
1	1	0	-3.21269	-3.43101	0	GO:0016358	M110	2	0	GO Biological Processes	19	dendrite development	19_GO:0032502 developmental process	-3.43101	5.32649	4.99451	28133	234	158	7	4.43038	1.63701	102|348|1020|9201|23043|55201|57118	ADAM10|APOE|CDK5|DCLK1|TNIK|MAP1S|CAMK1D	-2.14435	0	19	0	0	-9.40146	6.0917
0	1	0	0	-2.10036	0	GO:0048813	M010	1	0	GO Biological Processes	19	dendrite morphogenesis	19_GO:0032502 developmental process	-2.38218	3.48958	3.56052	28133	139	406	7	1.72414	0.646021	102|1020|1627|8499|9201|9693|23043	ADAM10|CDK5|DBN1|PPFIA2|DCLK1|RAPGEF2|TNIK	-1.13988	0	19	0	0	-9.40146	6.0917
0	1	0	0	-2.05877	0	GO:0060998	M010	1	0	GO Biological Processes	19	regulation of dendritic spine development	19_GO:0032502 developmental process	-2.33613	4.61954	3.79811	28133	75	406	5	1.23153	0.547354	102|348|1020|1627|8499	ADAM10|APOE|CDK5|DBN1|PPFIA2	-1.09911	0	19	0	0	-9.40146	6.0917
1	0	1	-7.25607	0	-7.02329	GO:0010038	M101	2	0	GO Biological Processes	19	response to metal ion	19_GO:0050896 response to stimulus	-9.37129	4.72453	8.50904	28133	352	406	24	5.91133	1.17044	210|310|358|445|513|805|1528|2039|2185|2235|2244|2934|4137|5066|5224|6284|6647|8826|8895|8904|9456|23498|27101|51596	ALAD|ANXA7|AQP1|ASS1|ATP5F1D|CALM2|CYB5A|DMTN|PTK2B|FECH|FGB|GSN|MAPT|PAM|PGAM2|S100A13|SOD1|IQGAP1|CPNE3|CPNE1|HOMER1|HAAO|CACYBP|CUTA	-6.88744	0	20	1	1	-9.37129	11.0673
1	1	1	-7.73636	-2.98509	-5.99101	GO:0010035	M111	3	0	GO Biological Processes	19	response to inorganic substance	19_GO:0050896 response to stimulus	-9.34243	3.82835	8.05321	28133	543	406	30	7.38916	1.29827	210|310|358|445|493|513|805|1528|2039|2185|2235|2244|2775|2934|3178|4137|5066|5224|6284|6647|6714|8826|8895|8904|9456|23498|27101|51596|80781|140885	ALAD|ANXA7|AQP1|ASS1|ATP2B4|ATP5F1D|CALM2|CYB5A|DMTN|PTK2B|FECH|FGB|GNAO1|GSN|HNRNPA1|MAPT|PAM|PGAM2|S100A13|SOD1|SRC|IQGAP1|CPNE3|CPNE1|HOMER1|HAAO|CACYBP|CUTA|COL18A1|SIRPA	-6.87002	0	20	0	0	-9.37129	11.0673
1	0	1	-5.40018	0	-2.27785	GO:0051592	M101	2	0	GO Biological Processes	19	response to calcium ion	19_GO:0050896 response to stimulus	-5.40018	10.8778	7.96194	28133	146	124	7	5.64516	2.07257	310|805|2244|8826|8895|8904|27101	ANXA7|CALM2|FGB|IQGAP1|CPNE3|CPNE1|CACYBP	-3.53958	0	20	0	0	-9.37129	11.0673
1	0	0	-3.70629	0	0	GO:0071248	M100	1	0	GO Biological Processes	19	cellular response to metal ion	19_GO:0050896 response to stimulus	-3.70629	7.20251	5.69267	28133	189	124	6	4.83871	1.92701	210|6647|8826|8895|8904|27101	ALAD|SOD1|IQGAP1|CPNE3|CPNE1|CACYBP	-2.34126	0	20	0	0	-9.37129	11.0673
1	0	0	-3.39577	0	0	GO:0071241	M100	1	0	GO Biological Processes	19	cellular response to inorganic substance	19_GO:0050896 response to stimulus	-3.39577	6.3022	5.20488	28133	216	124	6	4.83871	1.92701	210|6647|8826|8895|8904|27101	ALAD|SOD1|IQGAP1|CPNE3|CPNE1|CACYBP	-2.12037	0	20	0	0	-9.37129	11.0673
1	0	0	-3.31678	0	0	GO:0071277	M100	1	0	GO Biological Processes	19	cellular response to calcium ion	19_GO:0050896 response to stimulus	-3.31678	11.0673	6.07445	28133	82	124	4	3.22581	1.58668	8826|8895|8904|27101	IQGAP1|CPNE3|CPNE1|CACYBP	-2.06065	0	20	0	0	-9.37129	11.0673
1	1	1	-2.37319	-7.9105	-4.73013	GO:0051668	M111	3	0	GO Biological Processes	19	localization within membrane	19_GO:0051179 localization	-9.2933	7.49115	9.58079	28133	148	406	16	3.94089	0.965613	102|348|1000|1012|1020|1627|2339|2934|5879|5898|6616|7070|8943|55737|112755|375790	ADAM10|APOE|CDH2|CDH13|CDK5|DBN1|FNTA|GSN|RAC1|RALA|SNAP25|THY1|AP3D1|VPS35|STX1B|AGRN	-6.86382	0	21	1	1	-9.2933	9.32792
0	1	0	0	-3.6774	0	GO:0043113	M010	1	0	GO Biological Processes	19	receptor clustering	19_GO:0051179 localization	-5.02385	9.32792	7.2735	28133	52	406	7	1.72414	0.646021	348|1000|1020|2339|2934|7070|375790	APOE|CDH2|CDK5|FNTA|GSN|THY1|AGRN	-3.39492	0	21	0	0	-9.2933	9.32792
0	1	1	0	-2.02351	-2.49496	GO:0051235	M011	2	0	GO Biological Processes	19	maintenance of location	19_GO:0051179 localization	-3.08788	2.82386	3.9643	28133	319	406	13	3.20197	0.873733	348|805|1020|1627|2185|2934|4842|5716|7070|7442|8943|10226|54832	APOE|CALM2|CDK5|DBN1|PTK2B|GSN|NOS1|PSMD10|THY1|TRPV1|AP3D1|PLIN3|VPS13C	-1.74601	0	21	0	0	-9.2933	9.32792
0	1	1	0	-5.45056	-6.09574	GO:0051640	M011	2	0	GO Biological Processes	19	organelle localization	19_GO:0051179 localization	-9.23702	3.34518	7.74139	28133	725	406	35	8.62069	1.39294	966|1000|1020|1778|1780|4134|4137|4644|5577|5582|6284|6616|6804|6812|7314|7430|8452|8499|8541|8546|8943|9900|10096|10383|11258|22919|23122|26059|54732|55201|55207|65009|80331|112755|203068	CD59|CDH2|CDK5|DYNC1H1|DYNC1I1|MAP4|MAPT|MYO5A|PRKAR2B|PRKCG|S100A13|SNAP25|STX1A|STXBP1|UBB|EZR|CUL3|PPFIA2|PPFIA3|AP3B1|AP3D1|SV2A|ACTR3|TUBB4B|DCTN3|MAPRE1|CLASP2|ERC2|TMED9|MAP1S|ARL8B|NDRG4|DNAJC5|STX1B|TUBB	-6.82259	0	22	1	1	-9.23702	131.463
0	1	1	0	-4.14646	-8.88569	GO:0099504	M011	2	0	GO Biological Processes	19	synaptic vesicle cycle	19_GO:0051179 localization	-8.95488	6.58091	9.06403	28133	179	406	17	4.18719	0.994055	1000|1020|5533|5582|6616|6623|6804|6812|8411|8499|8541|8546|8943|9900|26059|80331|112755	CDH2|CDK5|PPP3CC|PRKCG|SNAP25|SNCG|STX1A|STXBP1|EEA1|PPFIA2|PPFIA3|AP3B1|AP3D1|SV2A|ERC2|DNAJC5|STX1B	-6.6003	0	22	0	0	-9.23702	131.463
1	1	1	-2.38749	-3.85321	-6.39579	GO:0001505	M111	3	0	GO Biological Processes	19	regulation of neurotransmitter levels	19_GO:0065007 biological regulation	-8.91396	4.67373	8.25917	28133	341	406	23	5.66502	1.14729	445|493|1020|1312|2185|4842|5582|5879|6616|6623|6804|6812|8499|8541|8570|9900|10211|26059|80331|80777|112755|133121|140885	ASS1|ATP2B4|CDK5|COMT|PTK2B|NOS1|PRKCG|RAC1|SNAP25|SNCG|STX1A|STXBP1|PPFIA2|PPFIA3|KHSRP|SV2A|FLOT1|ERC2|DNAJC5|CYB5B|STX1B|ENPP6|SIRPA	-6.57606	0	22	0	0	-9.23702	131.463
0	1	1	0	-3.09743	-8.48662	GO:0099003	M011	2	0	GO Biological Processes	19	vesicle-mediated transport in synapse	19_GO:0051179 localization	-8.48662	8.85499	9.58669	28133	193	214	13	6.07477	1.63286	5533|5582|6616|6623|6804|8499|8541|8546|8943|9900|26059|80331|112755	PPP3CC|PRKCG|SNAP25|SNCG|STX1A|PPFIA2|PPFIA3|AP3B1|AP3D1|SV2A|ERC2|DNAJC5|STX1B	-5.84807	0	22	0	0	-9.23702	131.463
0	1	1	0	-4.91658	-6.82951	GO:0051648	M011	2	0	GO Biological Processes	19	vesicle localization	19_GO:0051179 localization	-8.12477	4.63425	7.83648	28133	314	406	21	5.17241	1.09913	966|1000|1020|1778|1780|4644|5582|6616|6804|6812|8452|8499|8541|8546|8943|9900|23122|26059|54732|80331|112755	CD59|CDH2|CDK5|DYNC1H1|DYNC1I1|MYO5A|PRKCG|SNAP25|STX1A|STXBP1|CUL3|PPFIA2|PPFIA3|AP3B1|AP3D1|SV2A|CLASP2|ERC2|TMED9|DNAJC5|STX1B	-5.96177	0	22	0	0	-9.23702	131.463
0	1	1	0	-2.93861	-7.99249	GO:0048489	M011	2	0	GO Biological Processes	19	synaptic vesicle transport	19_GO:0051179 localization	-7.99249	10.4035	9.73022	28133	139	214	11	5.14019	1.50947	5582|6616|6804|8499|8541|8546|8943|9900|26059|80331|112755	PRKCG|SNAP25|STX1A|PPFIA2|PPFIA3|AP3B1|AP3D1|SV2A|ERC2|DNAJC5|STX1B	-5.53413	0	22	0	0	-9.23702	131.463
0	1	1	0	-2.93861	-7.99249	GO:0097480	M011	2	0	GO Biological Processes	19	establishment of synaptic vesicle localization	19_GO:0051179 localization	-7.99249	10.4035	9.73022	28133	139	214	11	5.14019	1.50947	5582|6616|6804|8499|8541|8546|8943|9900|26059|80331|112755	PRKCG|SNAP25|STX1A|PPFIA2|PPFIA3|AP3B1|AP3D1|SV2A|ERC2|DNAJC5|STX1B	-5.53413	0	22	0	0	-9.23702	131.463
1	1	1	-2.05253	-3.69866	-6.87847	GO:0051656	M111	3	0	GO Biological Processes	19	establishment of organelle localization	19_GO:0051179 localization	-7.78896	3.55687	7.16315	28133	526	406	27	6.65025	1.23655	966|1020|1778|1780|4134|4137|4644|5582|6284|6616|6804|6812|7314|7430|8452|8499|8541|8546|8943|9900|10096|23122|26059|54732|55201|80331|112755	CD59|CDK5|DYNC1H1|DYNC1I1|MAP4|MAPT|MYO5A|PRKCG|S100A13|SNAP25|STX1A|STXBP1|UBB|EZR|CUL3|PPFIA2|PPFIA3|AP3B1|AP3D1|SV2A|ACTR3|CLASP2|ERC2|TMED9|MAP1S|DNAJC5|STX1B	-5.69251	0	22	0	0	-9.23702	131.463
0	1	1	0	-4.26467	-7.0546	GO:0051650	M011	2	0	GO Biological Processes	19	establishment of vesicle localization	19_GO:0051179 localization	-7.71883	4.60419	7.60731	28133	301	406	20	4.92611	1.07404	966|1020|1778|1780|4644|5582|6616|6804|6812|8452|8499|8541|8546|8943|9900|23122|26059|54732|80331|112755	CD59|CDK5|DYNC1H1|DYNC1I1|MYO5A|PRKCG|SNAP25|STX1A|STXBP1|CUL3|PPFIA2|PPFIA3|AP3B1|AP3D1|SV2A|CLASP2|ERC2|TMED9|DNAJC5|STX1B	-5.63638	0	22	0	0	-9.23702	131.463
0	1	1	0	-3.71007	-7.70767	GO:0097479	M011	2	0	GO Biological Processes	19	synaptic vesicle localization	19_GO:0051179 localization	-7.70767	9.77087	9.3663	28133	148	214	11	5.14019	1.50947	5582|6616|6804|8499|8541|8546|8943|9900|26059|80331|112755	PRKCG|SNAP25|STX1A|PPFIA2|PPFIA3|AP3B1|AP3D1|SV2A|ERC2|DNAJC5|STX1B	-5.31255	0	22	0	0	-9.23702	131.463
0	1	1	0	-4.54761	-5.06807	ko04721	M011	2	0	KEGG Pathway	24	Synaptic vesicle cycle		-7.64411	10.9989	9.61421	28133	63	406	10	2.46305	0.769234	534|1175|1211|1212|6616|6804|6812|51382|51606|112755	ATP6V1G2|AP2S1|CLTA|CLTB|SNAP25|STX1A|STXBP1|ATP6V1D|ATP6V1H|STX1B	-5.57746	0	22	0	0	-9.23702	131.463
0	1	1	0	-2.54529	-6.97486	GO:0016079	M011	2	0	GO Biological Processes	19	synaptic vesicle exocytosis	19_GO:0023052 signaling	-6.97486	11.3766	9.28163	28133	104	214	9	4.20561	1.37207	5582|6616|6804|8499|8541|9900|26059|80331|112755	PRKCG|SNAP25|STX1A|PPFIA2|PPFIA3|SV2A|ERC2|DNAJC5|STX1B	-4.75583	0	22	0	0	-9.23702	131.463
0	1	1	0	-3.80232	-6.58652	GO:0016082	M011	2	0	GO Biological Processes	19	synaptic vesicle priming	19_GO:0023052 signaling	-6.69569	21.882	11.0179	28133	19	406	6	1.47783	0.598848	6616|6804|6812|9900|26059|112755	SNAP25|STX1A|STXBP1|SV2A|ERC2|STX1B	-4.8351	0	22	0	0	-9.23702	131.463
0	1	1	0	-4.07294	-4.50012	hsa04721	M011	2	0	KEGG Pathway	24	Synaptic vesicle cycle		-6.68116	8.77128	8.3699	28133	79	406	10	2.46305	0.769234	534|1175|1211|1212|6616|6804|6812|51382|51606|112755	ATP6V1G2|AP2S1|CLTA|CLTB|SNAP25|STX1A|STXBP1|ATP6V1D|ATP6V1H|STX1B	-4.82469	0	22	0	0	-9.23702	131.463
0	0	1	0	0	-6.48109	GO:0007269	M001	1	0	GO Biological Processes	19	neurotransmitter secretion	19_GO:0023052 signaling	-6.48109	8.48146	8.17713	28133	155	214	10	4.6729	1.44276	5582|6616|6623|6804|8499|8541|9900|26059|80331|112755	PRKCG|SNAP25|SNCG|STX1A|PPFIA2|PPFIA3|SV2A|ERC2|DNAJC5|STX1B	-4.35264	0	22	0	0	-9.23702	131.463
0	0	1	0	0	-6.45518	GO:0099643	M001	1	0	GO Biological Processes	19	signal release from synapse	19_GO:0023052 signaling	-6.45518	8.42709	8.144	28133	156	214	10	4.6729	1.44276	5582|6616|6623|6804|8499|8541|9900|26059|80331|112755	PRKCG|SNAP25|SNCG|STX1A|PPFIA2|PPFIA3|SV2A|ERC2|DNAJC5|STX1B	-4.33901	0	22	0	0	-9.23702	131.463
0	0	1	0	0	-6.36247	R-HSA-5250971	M001	1	0	Reactome Gene Sets	6	Toxicity of botulinum toxin type C (botC)		-6.36247	131.463	19.7842	28133	3	214	3	1.40187	0.803676	6616|6804|112755	SNAP25|STX1A|STX1B	-4.26125	0	22	0	0	-9.23702	131.463
0	0	1	0	0	-6.18074	R-HSA-168799	M001	1	0	Reactome Gene Sets	6	Neurotoxicity of clostridium toxins		-6.18074	52.585	14.284	28133	10	214	4	1.86916	0.925804	6616|6804|9900|112755	SNAP25|STX1A|SV2A|STX1B	-4.1163	0	22	0	0	-9.23702	131.463
0	0	1	0	0	-5.98704	GO:0016081	M001	1	0	GO Biological Processes	19	synaptic vesicle docking	19_GO:0023052 signaling	-5.98704	47.8046	13.5931	28133	11	214	4	1.86916	0.925804	6616|6804|8541|112755	SNAP25|STX1A|PPFIA3|STX1B	-3.9666	0	22	0	0	-9.23702	131.463
0	1	1	0	-2.11117	-5.9271	GO:0017156	M011	2	0	GO Biological Processes	19	calcium ion regulated exocytosis	19_GO:0051179 localization	-5.9271	8.57365	7.80839	28133	138	214	9	4.20561	1.37207	5582|6616|6804|8499|8541|9900|26059|80331|112755	PRKCG|SNAP25|STX1A|PPFIA2|PPFIA3|SV2A|ERC2|DNAJC5|STX1B	-3.9321	0	22	0	0	-9.23702	131.463
0	1	1	0	-2.42866	-5.23379	GO:0006836	M011	2	0	GO Biological Processes	19	neurotransmitter transport	19_GO:0051179 localization	-5.81068	4.23164	6.3593	28133	262	406	16	3.94089	0.965613	358|1020|4842|5582|6616|6623|6804|6812|8499|8541|9900|10211|26059|79751|80331|112755	AQP1|CDK5|NOS1|PRKCG|SNAP25|SNCG|STX1A|STXBP1|PPFIA2|PPFIA3|SV2A|FLOT1|ERC2|SLC25A22|DNAJC5|STX1B	-4.0603	0	22	0	0	-9.23702	131.463
0	0	1	0	0	-5.57664	GO:0140029	M001	1	0	GO Biological Processes	19	exocytic process	19_GO:0051179 localization	-5.57664	11.503	8.23617	28133	80	214	7	3.27103	1.21594	2039|6616|6804|8541|9900|26059|112755	DMTN|SNAP25|STX1A|PPFIA3|SV2A|ERC2|STX1B	-3.67105	0	22	0	0	-9.23702	131.463
0	0	1	0	0	-5.14456	R-HSA-264642	M001	1	0	Reactome Gene Sets	6	Acetylcholine Neurotransmitter Release Cycle		-5.48466	20.3803	9.6721	28133	17	406	5	1.23153	0.547354	6616|6804|6812|8499|8541	SNAP25|STX1A|STXBP1|PPFIA2|PPFIA3	-3.79693	0	22	0	0	-9.23702	131.463
0	1	1	0	-4.5723	-5.45408	R-HSA-5339562	M011	2	0	Reactome Gene Sets	6	Uptake and actions of bacterial toxins		-5.45408	21.2036	9.8537	28133	31	214	5	2.33645	1.03261	805|6616|6804|9900|112755	CALM2|SNAP25|STX1A|SV2A|STX1B	-3.57947	0	22	0	0	-9.23702	131.463
0	0	1	0	0	-5.03801	R-HSA-181429	M001	1	0	Reactome Gene Sets	6	Serotonin Neurotransmitter Release Cycle		-5.3485	19.2481	9.37123	28133	18	406	5	1.23153	0.547354	6616|6804|6812|8499|8541	SNAP25|STX1A|STXBP1|PPFIA2|PPFIA3	-3.68068	0	22	0	0	-9.23702	131.463
0	0	1	0	0	-5.03801	R-HSA-181430	M001	1	0	Reactome Gene Sets	6	Norepinephrine Neurotransmitter Release Cycle		-5.3485	19.2481	9.37123	28133	18	406	5	1.23153	0.547354	6616|6804|6812|8499|8541	SNAP25|STX1A|STXBP1|PPFIA2|PPFIA3	-3.68068	0	22	0	0	-9.23702	131.463
0	1	1	0	-2.52715	-4.36706	WP2267	M011	2	0	WikiPathways	27	Synaptic Vesicle Pathway		-5.08126	9.51082	7.3613	28133	51	406	7	1.72414	0.646021	291|1175|1211|6616|6804|6812|112755	SLC25A4|AP2S1|CLTA|SNAP25|STX1A|STXBP1|STX1B	-3.44592	0	22	0	0	-9.23702	131.463
0	0	1	0	0	-4.02354	GO:0098693	M001	1	0	GO Biological Processes	19	regulation of synaptic vesicle cycle	19_GO:0051179 localization	-4.97253	6.49623	6.52749	28133	96	406	9	2.21675	0.73068	1000|1020|5533|5582|6804|6812|8499|80331|112755	CDH2|CDK5|PPP3CC|PRKCG|STX1A|STXBP1|PPFIA2|DNAJC5|STX1B	-3.35162	0	22	0	0	-9.23702	131.463
0	0	1	0	0	-4.5895	R-HSA-212676	M001	1	0	Reactome Gene Sets	6	Dopamine Neurotransmitter Release Cycle		-4.78023	15.0637	8.1648	28133	23	406	5	1.23153	0.547354	6616|6804|6812|8499|8541	SNAP25|STX1A|STXBP1|PPFIA2|PPFIA3	-3.18175	0	22	0	0	-9.23702	131.463
0	1	1	0	-2.2247	-3.34368	GO:0051588	M011	2	0	GO Biological Processes	19	regulation of neurotransmitter transport	19_GO:0051179 localization	-4.75596	5.41352	6.05598	28133	128	406	10	2.46305	0.769234	1020|4842|5582|6623|6804|6812|8499|9900|10211|112755	CDK5|NOS1|PRKCG|SNCG|STX1A|STXBP1|PPFIA2|SV2A|FLOT1|STX1B	-3.16123	0	22	0	0	-9.23702	131.463
0	0	1	0	0	-4.51291	R-HSA-210500	M001	1	0	Reactome Gene Sets	6	Glutamate Neurotransmitter Release Cycle		-4.68394	14.4361	7.96832	28133	24	406	5	1.23153	0.547354	6616|6804|6812|8499|8541	SNAP25|STX1A|STXBP1|PPFIA2|PPFIA3	-3.10101	0	22	0	0	-9.23702	131.463
0	0	1	0	0	-4.36706	R-HSA-112310	M001	1	0	Reactome Gene Sets	6	Neurotransmitter release cycle		-4.36706	12.8885	7.43969	28133	51	214	5	2.33645	1.03261	6616|6804|8499|8541|80331	SNAP25|STX1A|PPFIA2|PPFIA3|DNAJC5	-2.82572	0	22	0	0	-9.23702	131.463
0	0	1	0	0	-3.41525	R-HSA-888590	M001	1	0	Reactome Gene Sets	6	GABA synthesis, release, reuptake and degradation		-3.85539	14.588	7.16941	28133	19	406	4	0.985222	0.490178	6616|6804|6812|80331	SNAP25|STX1A|STXBP1|DNAJC5	-2.39576	0	22	0	0	-9.23702	131.463
0	0	1	0	0	-3.28259	GO:0031629	M001	1	0	GO Biological Processes	19	synaptic vesicle fusion to presynaptic active zone membrane	19_GO:0023052 signaling	-3.67662	13.1987	6.76688	28133	21	406	4	0.985222	0.490178	6616|6804|6812|112755	SNAP25|STX1A|STXBP1|STX1B	-2.2456	0	22	0	0	-9.23702	131.463
0	0	1	0	0	-3.28259	GO:0099500	M001	1	0	GO Biological Processes	19	vesicle fusion to plasma membrane	19_GO:0051179 localization	-3.67662	13.1987	6.76688	28133	21	406	4	0.985222	0.490178	6616|6804|6812|112755	SNAP25|STX1A|STXBP1|STX1B	-2.2456	0	22	0	0	-9.23702	131.463
1	1	0	-2.14458	-2.53396	0	GO:0061025	M110	2	0	GO Biological Processes	19	membrane fusion	19_GO:0071840 cellular component organization or biogenesis	-3.67495	4.02867	4.82116	28133	172	406	10	2.46305	0.769234	310|5478|6616|6804|6812|8396|8411|8774|25801|112755	ANXA7|PPIA|SNAP25|STX1A|STXBP1|PIP4K2B|EEA1|NAPG|GCA|STX1B	-2.24444	0	22	0	0	-9.23702	131.463
0	0	1	0	0	-3.61975	GO:0014047	M001	1	0	GO Biological Processes	19	glutamate secretion	19_GO:0051179 localization	-3.61975	13.1463	6.73024	28133	40	214	4	1.86916	0.925804	6616|6804|8499|8541	SNAP25|STX1A|PPFIA2|PPFIA3	-2.27954	0	22	0	0	-9.23702	131.463
0	0	1	0	0	-3.19914	GO:0046928	M001	1	0	GO Biological Processes	19	regulation of neurotransmitter secretion	19_GO:0023052 signaling	-3.48057	5.38946	5.04699	28133	90	406	7	1.72414	0.646021	1020|5582|6623|6804|6812|8499|112755	CDK5|PRKCG|SNCG|STX1A|STXBP1|PPFIA2|STX1B	-2.07397	0	22	0	0	-9.23702	131.463
0	0	1	0	0	-3.45822	GO:0006904	M001	1	0	GO Biological Processes	19	vesicle docking involved in exocytosis	19_GO:0051179 localization	-3.45822	11.9511	6.36466	28133	44	214	4	1.86916	0.925804	6616|6804|8541|112755	SNAP25|STX1A|PPFIA3|STX1B	-2.16415	0	22	0	0	-9.23702	131.463
0	1	1	0	-2.23028	-2.81435	GO:0048278	M011	2	0	GO Biological Processes	19	vesicle docking	19_GO:0051179 localization	-3.45513	6.39629	5.27057	28133	65	406	6	1.47783	0.598848	6616|6804|6812|8541|65009|112755	SNAP25|STX1A|STXBP1|PPFIA3|NDRG4|STX1B	-2.05335	0	22	0	0	-9.23702	131.463
0	0	1	0	0	-2.78977	GO:2000300	M001	1	0	GO Biological Processes	19	regulation of synaptic vesicle exocytosis	19_GO:0023052 signaling	-3.41898	6.29937	5.21567	28133	66	406	6	1.47783	0.598848	1020|5582|6804|6812|8499|112755	CDK5|PRKCG|STX1A|STXBP1|PPFIA2|STX1B	-2.02622	0	22	0	0	-9.23702	131.463
0	1	1	0	-2.19372	-2.7656	GO:0015800	M011	2	0	GO Biological Processes	19	acidic amino acid transport	19_GO:0051179 localization	-3.38348	6.20535	5.1619	28133	67	406	6	1.47783	0.598848	6616|6804|6812|8499|8541|79751	SNAP25|STX1A|STXBP1|PPFIA2|PPFIA3|SLC25A22	-1.99446	0	22	0	0	-9.23702	131.463
0	0	1	0	0	-3.11323	GO:0006835	M001	1	0	GO Biological Processes	19	dicarboxylic acid transport	19_GO:0051179 localization	-3.36519	5.16012	4.88878	28133	94	406	7	1.72414	0.646021	6616|6804|6812|8402|8499|8541|79751	SNAP25|STX1A|STXBP1|SLC25A11|PPFIA2|PPFIA3|SLC25A22	-1.98034	0	22	0	0	-9.23702	131.463
0	0	1	0	0	-2.65058	GO:1902803	M001	1	0	GO Biological Processes	19	regulation of synaptic vesicle transport	19_GO:0051179 localization	-3.21502	5.77443	4.90849	28133	72	406	6	1.47783	0.598848	1020|5582|6804|6812|8499|112755	CDK5|PRKCG|STX1A|STXBP1|PPFIA2|STX1B	-1.85307	0	22	0	0	-9.23702	131.463
0	1	0	0	-2.18639	0	GO:0017157	M010	1	0	GO Biological Processes	19	regulation of exocytosis	19_GO:0051179 localization	-3.02714	3.3314	4.08379	28133	208	406	10	2.46305	0.769234	1020|2244|5582|5898|6804|6812|7447|8499|23122|112755	CDK5|FGB|PRKCG|RALA|STX1A|STXBP1|VSNL1|PPFIA2|CLASP2|STX1B	-1.69599	0	22	0	0	-9.23702	131.463
0	0	1	0	0	-2.90925	GO:0006865	M001	1	0	GO Biological Processes	19	amino acid transport	19_GO:0051179 localization	-2.90925	5.08888	4.46909	28133	155	214	6	2.80374	1.12846	6520|6616|6804|8499|8541|9900	SLC3A2|SNAP25|STX1A|PPFIA2|PPFIA3|SV2A	-1.76612	0	22	0	0	-9.23702	131.463
0	1	1	0	-2.02713	-2.27785	GO:0048284	M011	2	0	GO Biological Processes	19	organelle fusion	19_GO:0071840 cellular component organization or biogenesis	-2.88178	3.79688	4.1	28133	146	406	8	1.97044	0.689759	2023|6616|6804|6812|8396|8411|54927|112755	ENO1|SNAP25|STX1A|STXBP1|PIP4K2B|EEA1|CHCHD3|STX1B	-1.56937	0	22	0	0	-9.23702	131.463
0	0	1	0	0	-2.74167	GO:0015711	M001	1	0	GO Biological Processes	19	organic anion transport	19_GO:0051179 localization	-2.74167	2.85788	3.69219	28133	506	214	11	5.14019	1.50947	291|293|358|6520|6616|6804|8402|8499|8541|9900|25874	SLC25A4|SLC25A6|AQP1|SLC3A2|SNAP25|STX1A|SLC25A11|PPFIA2|PPFIA3|SV2A|MPC2	-1.64061	0	22	0	0	-9.23702	131.463
0	0	1	0	0	-2.64164	GO:0046717	M001	1	0	GO Biological Processes	19	acid secretion	19_GO:0051179 localization	-2.64164	5.47761	4.30343	28133	120	214	5	2.33645	1.03261	6616|6804|8499|8541|9900	SNAP25|STX1A|PPFIA2|PPFIA3|SV2A	-1.56717	0	22	0	0	-9.23702	131.463
0	1	0	0	-2.54529	0	GO:0006906	M010	1	0	GO Biological Processes	19	vesicle fusion	19_GO:0051179 localization	-2.54529	6.84834	4.49045	28133	104	158	4	2.53165	1.2497	6616|6812|8396|8411	SNAP25|STXBP1|PIP4K2B|EEA1	-1.49748	0	22	0	0	-9.23702	131.463
0	0	1	0	0	-2.15611	GO:0017158	M001	1	0	GO Biological Processes	19	regulation of calcium ion-dependent exocytosis	19_GO:0051179 localization	-2.50032	4.19958	3.85905	28133	99	406	6	1.47783	0.598848	1020|5582|6804|6812|8499|112755	CDK5|PRKCG|STX1A|STXBP1|PPFIA2|STX1B	-1.24419	0	22	0	0	-9.23702	131.463
0	1	0	0	-2.4577	0	GO:0090174	M010	1	0	GO Biological Processes	19	organelle membrane fusion	19_GO:0071840 cellular component organization or biogenesis	-2.4577	6.4748	4.32365	28133	110	158	4	2.53165	1.2497	6616|6812|8396|8411	SNAP25|STXBP1|PIP4K2B|EEA1	-1.42901	0	22	0	0	-9.23702	131.463
0	0	1	0	0	-2.33317	GO:0006820	M001	1	0	GO Biological Processes	19	anion transport	19_GO:0051179 localization	-2.33317	2.4048	3.18743	28133	656	214	12	5.60748	1.5727	291|293|358|5250|6520|6616|6804|8402|8499|8541|9900|25874	SLC25A4|SLC25A6|AQP1|SLC25A3|SLC3A2|SNAP25|STX1A|SLC25A11|PPFIA2|PPFIA3|SV2A|MPC2	-1.33372	0	22	0	0	-9.23702	131.463
0	0	1	0	0	-2.24083	GO:0046942	M001	1	0	GO Biological Processes	19	carboxylic acid transport	19_GO:0051179 localization	-2.24083	2.98779	3.28567	28133	352	214	8	3.73832	1.29676	6520|6616|6804|8402|8499|8541|9900|25874	SLC3A2|SNAP25|STX1A|SLC25A11|PPFIA2|PPFIA3|SV2A|MPC2	-1.26202	0	22	0	0	-9.23702	131.463
0	0	1	0	0	-2.23364	GO:0015849	M001	1	0	GO Biological Processes	19	organic acid transport	19_GO:0051179 localization	-2.23364	2.97932	3.27639	28133	353	214	8	3.73832	1.29676	6520|6616|6804|8402|8499|8541|9900|25874	SLC3A2|SNAP25|STX1A|SLC25A11|PPFIA2|PPFIA3|SV2A|MPC2	-1.25711	0	22	0	0	-9.23702	131.463
1	1	1	-3.00599	-4.22552	-5.58448	GO:0044282	M111	3	0	GO Biological Processes	19	small molecule catabolic process	19_GO:0008152 metabolic process	-9.06798	4.08496	8.05473	28133	458	406	27	6.65025	1.23655	39|348|493|586|954|960|1629|2023|2098|2184|2875|4594|4842|4860|5208|5224|7263|10994|11313|23498|25828|30833|51084|51181|55276|56898|132789	ACAT2|APOE|ATP2B4|BCAT1|ENTPD2|CD44|DBT|ENO1|ESD|FAH|GPT|MMUT|NOS1|PNP|PFKFB2|PGAM2|TST|ILVBL|LYPLA2|HAAO|TXN2|NT5C|CRYL1|DCXR|PGM2|BDH2|GNPDA2	-6.67979	0	23	1	1	-9.06798	5.02934
1	1	1	-2.78029	-5.29716	-2.80616	GO:0016054	M111	3	0	GO Biological Processes	19	organic acid catabolic process	19_GO:0008152 metabolic process	-6.70038	4.39182	6.95182	28133	284	406	18	4.4335	1.02156	39|493|586|960|1629|2184|2875|4594|4842|7263|10994|11313|23498|25828|51084|51181|56898|132789	ACAT2|ATP2B4|BCAT1|CD44|DBT|FAH|GPT|MMUT|NOS1|TST|ILVBL|LYPLA2|HAAO|TXN2|CRYL1|DCXR|BDH2|GNPDA2	-4.83746	0	23	0	0	-9.06798	5.02934
1	1	1	-2.78029	-5.29716	-2.80616	GO:0046395	M111	3	0	GO Biological Processes	19	carboxylic acid catabolic process	19_GO:0008152 metabolic process	-6.70038	4.39182	6.95182	28133	284	406	18	4.4335	1.02156	39|493|586|960|1629|2184|2875|4594|4842|7263|10994|11313|23498|25828|51084|51181|56898|132789	ACAT2|ATP2B4|BCAT1|CD44|DBT|FAH|GPT|MMUT|NOS1|TST|ILVBL|LYPLA2|HAAO|TXN2|CRYL1|DCXR|BDH2|GNPDA2	-4.83746	0	23	0	0	-9.06798	5.02934
0	1	1	0	-2.37671	-3.25082	GO:0032787	M011	2	0	GO Biological Processes	19	monocarboxylic acid metabolic process	19_GO:0008152 metabolic process	-4.42657	2.52357	4.78913	28133	659	406	24	5.91133	1.17044	39|47|2023|2184|2739|2944|2950|4199|4282|4594|5066|5208|5224|5445|5577|5947|10994|11313|23498|25874|51084|51181|56898|145482	ACAT2|ACLY|ENO1|FAH|GLO1|GSTM1|GSTP1|ME1|MIF|MMUT|PAM|PFKFB2|PGAM2|PON2|PRKAR2B|RBP1|ILVBL|LYPLA2|HAAO|MPC2|CRYL1|DCXR|BDH2|PTGR2	-2.87385	0	23	0	0	-9.06798	5.02934
0	1	0	0	-2.27305	0	GO:0009063	M010	1	0	GO Biological Processes	19	cellular amino acid catabolic process	19_GO:0008152 metabolic process	-4.08707	5.02934	5.44136	28133	124	406	9	2.21675	0.73068	493|586|1629|2184|2875|4842|7263|23498|25828	ATP2B4|BCAT1|DBT|FAH|GPT|NOS1|TST|HAAO|TXN2	-2.59327	0	23	0	0	-9.06798	5.02934
0	0	1	0	0	-2.07818	GO:1901605	M001	1	0	GO Biological Processes	19	alpha-amino acid metabolic process	19_GO:0008152 metabolic process	-3.27223	3.32849	4.28125	28133	229	406	11	2.70936	0.80576	445|493|586|2184|2875|4594|4842|7263|10994|23498|29968	ASS1|ATP2B4|BCAT1|FAH|GPT|MMUT|NOS1|TST|ILVBL|HAAO|PSAT1	-1.90099	0	23	0	0	-9.06798	5.02934
0	1	1	0	-2.95258	-2.38089	GO:0072329	M011	2	0	GO Biological Processes	19	monocarboxylic acid catabolic process	19_GO:0008152 metabolic process	-3.0395	4.01699	4.29918	28133	138	406	8	1.97044	0.689759	39|2184|4594|10994|11313|51084|51181|56898	ACAT2|FAH|MMUT|ILVBL|LYPLA2|CRYL1|DCXR|BDH2	-1.70672	0	23	0	0	-9.06798	5.02934
0	0	1	0	0	-2.33609	GO:0008652	M001	1	0	GO Biological Processes	19	cellular amino acid biosynthetic process	19_GO:0008152 metabolic process	-2.75851	4.72453	4.23445	28133	88	406	6	1.47783	0.598848	445|493|586|2875|10994|29968	ASS1|ATP2B4|BCAT1|GPT|ILVBL|PSAT1	-1.46465	0	23	0	0	-9.06798	5.02934
1	1	1	-3.12804	-8.58852	-3.15565	R-HSA-111885	M111	3	0	Reactome Gene Sets	6	Opioid Signalling		-8.58852	17.4186	11.8543	28133	92	158	9	5.6962	1.84386	805|1020|2775|2781|2786|5577|10681|59345|84152	CALM2|CDK5|GNAO1|GNAZ|GNG4|PRKAR2B|GNB5|GNB4|PPP1R1B	-5.91981	0	24	1	1	-8.58852	31.7959
0	1	0	0	-6.33326	0	R-HSA-202040	M010	1	0	Reactome Gene Sets	6	G-protein activation		-6.33326	31.7959	12.2525	28133	28	158	5	3.16456	1.39266	2775|2781|2786|10681|59345	GNAO1|GNAZ|GNG4|GNB5|GNB4	-4.23917	0	24	0	0	-8.58852	31.7959
1	1	0	-3.2007	-6.1748	0	R-HSA-418346	M110	2	0	Reactome Gene Sets	6	Platelet homeostasis		-6.1748	14.1636	9.29465	28133	88	158	7	4.43038	1.63701	493|805|2786|4842|6543|10681|59345	ATP2B4|CALM2|GNG4|NOS1|SLC8A2|GNB5|GNB4	-4.11331	0	24	0	0	-8.58852	31.7959
1	1	0	-3.0543	-5.77435	0	R-HSA-9658195	M110	2	0	Reactome Gene Sets	6	Leishmania infection		-5.77435	7.0939	7.2881	28133	251	158	10	6.32911	1.93707	805|2781|2786|5577|5879|7525|10095|10096|10681|59345	CALM2|GNAZ|GNG4|PRKAR2B|RAC1|YES1|ARPC1B|ACTR3|GNB5|GNB4	-3.80638	0	24	0	0	-8.58852	31.7959
1	1	0	-3.39945	-5.27998	0	R-HSA-422356	M110	2	0	Reactome Gene Sets	6	Regulation of insulin secretion		-5.72528	7.99536	7.48624	28133	78	406	9	2.21675	0.73068	2786|4082|5577|6616|6804|6812|8826|10681|59345	GNG4|MARCKS|PRKAR2B|SNAP25|STX1A|STXBP1|IQGAP1|GNB5|GNB4	-3.99271	0	24	0	0	-8.58852	31.7959
0	1	1	0	-5.47417	-2.94181	R-HSA-418594	M011	2	0	Reactome Gene Sets	6	G alpha (i) signalling events		-5.47417	5.27576	6.51367	28133	405	158	12	7.59494	2.10757	348|805|1020|2775|2781|2786|4035|5577|5947|10681|59345|84152	APOE|CALM2|CDK5|GNAO1|GNAZ|GNG4|LRP1|PRKAR2B|RBP1|GNB5|GNB4|PPP1R1B	-3.58966	0	24	0	0	-8.58852	31.7959
0	1	0	0	-5.4235	0	R-HSA-6814122	M010	1	0	Reactome Gene Sets	6	Cooperation of PDCL (PhLP1) and TRiC/CCT in G-protein beta folding		-5.4235	21.1973	9.84413	28133	42	158	5	3.16456	1.39266	2775|2781|2786|10681|59345	GNAO1|GNAZ|GNG4|GNB5|GNB4	-3.55875	0	24	0	0	-8.58852	31.7959
1	1	0	-3.92451	-4.46795	0	R-HSA-163685	M110	2	0	Reactome Gene Sets	6	Integration of energy metabolism		-5.41288	6.41603	6.82389	28133	108	406	10	2.46305	0.769234	47|2786|4082|5577|6616|6804|6812|8826|10681|59345	ACLY|GNG4|MARCKS|PRKAR2B|SNAP25|STX1A|STXBP1|IQGAP1|GNB5|GNB4	-3.73612	0	24	0	0	-8.58852	31.7959
1	1	0	-2.90807	-5.06814	0	ko05034	M110	2	0	KEGG Pathway	24	Alcoholism		-5.06814	7.91364	6.99315	28133	180	158	8	5.06329	1.74423	805|2775|2786|3020|8359|10681|59345|84152	CALM2|GNAO1|GNG4|H3-3A|H4C1|GNB5|GNB4|PPP1R1B	-3.30466	0	24	0	0	-8.58852	31.7959
1	1	0	-2.57465	-5.03912	0	ko04728	M110	2	0	KEGG Pathway	24	Dopaminergic synapse		-5.03912	9.58768	7.37546	28133	130	158	7	4.43038	1.63701	805|1312|2775|2786|10681|59345|84152	CALM2|COMT|GNAO1|GNG4|GNB5|GNB4|PPP1R1B	-3.28656	0	24	0	0	-8.58852	31.7959
1	1	1	-2.0647	-4.78468	-2.21872	R-HSA-390466	M111	3	0	Reactome Gene Sets	6	Chaperonin-mediated protein folding		-5.00979	6.56461	6.57408	28133	95	406	9	2.21675	0.73068	2775|2781|2786|7411|10383|10681|59345|84617|84790	GNAO1|GNAZ|GNG4|VBP1|TUBB4B|GNB5|GNB4|TUBB6|TUBA1C	-3.38408	0	24	0	0	-8.58852	31.7959
1	1	0	-2.55074	-4.99567	0	hsa04728	M110	2	0	KEGG Pathway	24	Dopaminergic synapse		-4.99567	9.44241	7.30652	28133	132	158	7	4.43038	1.63701	805|1312|2775|2786|10681|59345|84152	CALM2|COMT|GNAO1|GNG4|GNB5|GNB4|PPP1R1B	-3.25377	0	24	0	0	-8.58852	31.7959
1	1	0	-2.85547	-4.98133	0	hsa05034	M110	2	0	KEGG Pathway	24	Alcoholism		-4.98133	7.69976	6.8709	28133	185	158	8	5.06329	1.74423	805|2775|2786|3020|8359|10681|59345|84152	CALM2|GNAO1|GNG4|H3-3A|H4C1|GNB5|GNB4|PPP1R1B	-3.24386	0	24	0	0	-8.58852	31.7959
0	1	0	0	-4.91095	0	hsa04926	M010	1	0	KEGG Pathway	24	relaxin signaling pathway		-4.91095	9.1647	7.17295	28133	136	158	7	4.43038	1.63701	408|2775|2786|4842|5605|10681|59345	ARRB1|GNAO1|GNG4|NOS1|MAP2K2|GNB5|GNB4	-3.19153	0	24	0	0	-8.58852	31.7959
0	1	1	0	-4.63288	-2.12592	R-HSA-391251	M011	2	0	Reactome Gene Sets	6	Protein folding		-4.79301	6.17463	6.30413	28133	101	406	9	2.21675	0.73068	2775|2781|2786|7411|10383|10681|59345|84617|84790	GNAO1|GNAZ|GNG4|VBP1|TUBB4B|GNB5|GNB4|TUBB6|TUBA1C	-3.18998	0	24	0	0	-8.58852	31.7959
0	1	0	0	-4.71083	0	hsa04371	M010	1	0	KEGG Pathway	24	Apelin signaling pathway		-4.71083	8.53698	6.86182	28133	146	158	7	4.43038	1.63701	805|2786|4842|5605|6543|10681|59345	CALM2|GNG4|NOS1|MAP2K2|SLC8A2|GNB5|GNB4	-3.0576	0	24	0	0	-8.58852	31.7959
1	1	0	-2.00406	-4.65747	0	hsa04713	M110	2	0	KEGG Pathway	24	circadian entrainment		-4.65747	10.6834	7.29017	28133	100	158	6	3.79747	1.52059	805|2775|2786|4842|10681|59345	CALM2|GNAO1|GNG4|NOS1|GNB5|GNB4	-3.01692	0	24	0	0	-8.58852	31.7959
1	1	0	-2.36283	-4.65379	0	WP536	M110	2	0	WikiPathways	27	Calcium Regulation in the Cardiac Cell		-4.65379	8.36509	6.77423	28133	149	158	7	4.43038	1.63701	408|805|2775|2786|5577|10681|59345	ARRB1|CALM2|GNAO1|GNG4|PRKAR2B|GNB5|GNB4	-3.01504	0	24	0	0	-8.58852	31.7959
1	1	0	-2.58253	-4.58156	0	R-HSA-4086398	M110	2	0	Reactome Gene Sets	6	Ca2+ pathway		-4.58156	14.3594	7.91405	28133	62	158	5	3.16456	1.39266	805|2775|2786|10681|59345	CALM2|GNAO1|GNG4|GNB5|GNB4	-2.96695	0	24	0	0	-8.58852	31.7959
0	1	0	0	-4.5162	0	R-HSA-451326	M010	1	0	Reactome Gene Sets	6	Activation of kainate receptors upon glutamate binding		-4.5162	22.2571	9.04195	28133	32	158	4	2.53165	1.2497	805|2786|10681|59345	CALM2|GNG4|GNB5|GNB4	-2.93117	0	24	0	0	-8.58852	31.7959
0	1	0	0	-4.5162	0	R-HSA-456926	M010	1	0	Reactome Gene Sets	6	Thrombin signalling through proteinase activated receptors (PARs)		-4.5162	22.2571	9.04195	28133	32	158	4	2.53165	1.2497	408|2786|10681|59345	ARRB1|GNG4|GNB5|GNB4	-2.93117	0	24	0	0	-8.58852	31.7959
0	1	0	0	-4.50783	0	WP289	M010	1	0	WikiPathways	27	Myometrial Relaxation and Contraction Pathways		-4.50783	7.93885	6.55221	28133	157	158	7	4.43038	1.63701	408|805|2786|4842|5577|10681|59345	ARRB1|CALM2|GNG4|NOS1|PRKAR2B|GNB5|GNB4	-2.9278	0	24	0	0	-8.58852	31.7959
0	1	1	0	-4.31728	-2.07818	hsa05170	M011	2	0	KEGG Pathway	24	human immunodeficiency virus 1 infection		-4.4988	3.93367	5.39396	28133	229	406	13	3.20197	0.873733	637|805|2185|2775|2786|5533|5582|5605|5879|6923|10681|23541|59345	BID|CALM2|PTK2B|GNAO1|GNG4|PPP3CC|PRKCG|MAP2K2|RAC1|ELOB|GNB5|SEC14L2|GNB4	-2.93855	0	24	0	0	-8.58852	31.7959
0	1	0	0	-4.30403	0	R-HSA-9662851	M010	1	0	Reactome Gene Sets	6	Anti-inflammatory response favouring Leishmania parasite infection		-4.30403	7.37514	6.24708	28133	169	158	7	4.43038	1.63701	805|2781|2786|5577|7525|10681|59345	CALM2|GNAZ|GNG4|PRKAR2B|YES1|GNB5|GNB4	-2.78523	0	24	0	0	-8.58852	31.7959
0	1	0	0	-4.30403	0	R-HSA-9664433	M010	1	0	Reactome Gene Sets	6	Leishmania parasite growth and survival		-4.30403	7.37514	6.24708	28133	169	158	7	4.43038	1.63701	805|2781|2786|5577|7525|10681|59345	CALM2|GNAZ|GNG4|PRKAR2B|YES1|GNB5|GNB4	-2.78523	0	24	0	0	-8.58852	31.7959
0	1	1	0	-4.17431	-2.60115	hsa05163	M011	2	0	KEGG Pathway	24	human cytomegalovirus infection		-4.28861	3.75338	5.18365	28133	240	406	13	3.20197	0.873733	637|805|2185|2775|2786|5533|5582|5605|5879|6714|10681|23541|59345	BID|CALM2|PTK2B|GNAO1|GNG4|PPP3CC|PRKCG|MAP2K2|RAC1|SRC|GNB5|SEC14L2|GNB4	-2.75837	0	24	0	0	-8.58852	31.7959
0	1	0	0	-4.1263	0	GO:0007212	M010	1	0	GO Biological Processes	19	dopamine receptor signaling pathway	19_GO:0023052 signaling	-4.1263	17.8057	7.99339	28133	40	158	4	2.53165	1.2497	2775|5064|10681|55737	GNAO1|PALM|GNB5|VPS35	-2.65545	0	24	0	0	-8.58852	31.7959
0	1	0	0	-4.07142	0	WP4223	M010	1	0	WikiPathways	27	Ras Signaling		-4.07142	6.77391	5.90526	28133	184	158	7	4.43038	1.63701	805|2786|5605|5879|5898|10681|59345	CALM2|GNG4|MAP2K2|RAC1|RALA|GNB5|GNB4	-2.61069	0	24	0	0	-8.58852	31.7959
0	1	0	0	-4.04204	0	R-HSA-381676	M010	1	0	Reactome Gene Sets	6	Glucagon-like Peptide-1 (GLP1) regulates insulin secretion		-4.04204	16.9578	7.77782	28133	42	158	4	2.53165	1.2497	2786|5577|10681|59345	GNG4|PRKAR2B|GNB5|GNB4	-2.59097	0	24	0	0	-8.58852	31.7959
0	1	0	0	-4.00153	0	R-HSA-432040	M010	1	0	Reactome Gene Sets	6	Vasopressin regulates renal water homeostasis via Aquaporins		-4.00153	16.5634	7.67552	28133	43	158	4	2.53165	1.2497	2786|5577|10681|59345	GNG4|PRKAR2B|GNB5|GNB4	-2.56275	0	24	0	0	-8.58852	31.7959
0	1	0	0	-3.87516	0	R-HSA-8964315	M010	1	0	Reactome Gene Sets	6	G beta:gamma signalling through BTK		-3.87516	29.6762	9.14602	28133	18	158	3	1.89873	1.08578	2786|10681|59345	GNG4|GNB5|GNB4	-2.46271	0	24	0	0	-8.58852	31.7959
0	1	0	0	-3.81326	0	R-HSA-418597	M010	1	0	Reactome Gene Sets	6	G alpha (z) signalling events		-3.81326	14.8381	7.21113	28133	48	158	4	2.53165	1.2497	2781|2786|10681|59345	GNAZ|GNG4|GNB5|GNB4	-2.41908	0	24	0	0	-8.58852	31.7959
0	1	0	0	-3.80232	0	R-HSA-392851	M010	1	0	Reactome Gene Sets	6	Prostacyclin signalling through prostacyclin receptor		-3.80232	28.1143	8.88499	28133	19	158	3	1.89873	1.08578	2786|10681|59345	GNG4|GNB5|GNB4	-2.41143	0	24	0	0	-8.58852	31.7959
1	1	0	-2.11585	-3.78183	0	ko05032	M110	2	0	KEGG Pathway	24	Morphine addiction		-3.78183	9.78335	6.30696	28133	91	158	5	3.16456	1.39266	408|2775|2786|10681|59345	ARRB1|GNAO1|GNG4|GNB5|GNB4	-2.39467	0	24	0	0	-8.58852	31.7959
1	1	0	-2.10283	-3.75952	0	WP2355	M110	2	0	WikiPathways	27	Corticotropin-releasing hormone signaling pathway		-3.75952	9.67701	6.26485	28133	92	158	5	3.16456	1.39266	408|2775|3728|10155|10681	ARRB1|GNAO1|JUP|TRIM28|GNB5	-2.37788	0	24	0	0	-8.58852	31.7959
1	1	0	-2.10283	-3.75952	0	hsa05032	M110	2	0	KEGG Pathway	24	Morphine addiction		-3.75952	9.67701	6.26485	28133	92	158	5	3.16456	1.39266	408|2775|2786|10681|59345	ARRB1|GNAO1|GNG4|GNB5|GNB4	-2.37788	0	24	0	0	-8.58852	31.7959
0	1	0	0	-3.73353	0	R-HSA-418217	M010	1	0	Reactome Gene Sets	6	G beta:gamma signalling through PLC beta		-3.73353	26.7085	8.64336	28133	20	158	3	1.89873	1.08578	2786|10681|59345	GNG4|GNB5|GNB4	-2.36095	0	24	0	0	-8.58852	31.7959
0	1	0	0	-3.73353	0	R-HSA-8964616	M010	1	0	Reactome Gene Sets	6	G beta:gamma signalling through CDC42		-3.73353	26.7085	8.64336	28133	20	158	3	1.89873	1.08578	2786|10681|59345	GNG4|GNB5|GNB4	-2.36095	0	24	0	0	-8.58852	31.7959
0	1	0	0	-3.6774	0	R-HSA-445717	M010	1	0	Reactome Gene Sets	6	Aquaporin-mediated transport		-3.6774	13.6967	6.88699	28133	52	158	4	2.53165	1.2497	2786|5577|10681|59345	GNG4|PRKAR2B|GNB5|GNB4	-2.32397	0	24	0	0	-8.58852	31.7959
0	1	0	0	-3.66837	0	R-HSA-500657	M010	1	0	Reactome Gene Sets	6	Presynaptic function of Kainate receptors		-3.66837	25.4367	8.4188	28133	21	158	3	1.89873	1.08578	2786|10681|59345	GNG4|GNB5|GNB4	-2.31722	0	24	0	0	-8.58852	31.7959
0	1	0	0	-3.60649	0	R-HSA-392170	M010	1	0	Reactome Gene Sets	6	ADP signalling through P2Y purinoceptor 12		-3.60649	24.2805	8.20936	28133	22	158	3	1.89873	1.08578	2786|10681|59345	GNG4|GNB5|GNB4	-2.27207	0	24	0	0	-8.58852	31.7959
0	1	0	0	-2.36219	0	hsa04724	M010	1	0	KEGG Pathway	24	Glutamatergic synapse		-3.51614	4.73799	4.90275	28133	117	406	8	1.97044	0.689759	2775|2786|5533|5582|9456|10681|59345|114787	GNAO1|GNG4|PPP3CC|PRKCG|HOMER1|GNB5|GNB4|GPRIN1	-2.10712	0	24	0	0	-8.58852	31.7959
0	1	0	0	-3.49138	0	R-HSA-428930	M010	1	0	Reactome Gene Sets	6	Thromboxane signalling through TP receptor		-3.49138	22.2571	7.82945	28133	24	158	3	1.89873	1.08578	2786|10681|59345	GNG4|GNB5|GNB4	-2.18747	0	24	0	0	-8.58852	31.7959
0	1	0	0	-3.43766	0	R-HSA-392451	M010	1	0	Reactome Gene Sets	6	G beta:gamma signalling through PI3Kgamma		-3.43766	21.3668	7.65636	28133	25	158	3	1.89873	1.08578	2786|10681|59345	GNG4|GNB5|GNB4	-2.14919	0	24	0	0	-8.58852	31.7959
0	1	0	0	-3.43766	0	R-HSA-418592	M010	1	0	Reactome Gene Sets	6	ADP signalling through P2Y purinoceptor 1		-3.43766	21.3668	7.65636	28133	25	158	3	1.89873	1.08578	2786|10681|59345	GNG4|GNB5|GNB4	-2.14919	0	24	0	0	-8.58852	31.7959
1	1	0	-2.60268	-3.40939	0	GO:0051926	M110	2	0	GO Biological Processes	19	negative regulation of calcium ion transport	19_GO:0048519 negative regulation of biological process	-3.40939	11.6759	6.273	28133	61	158	4	2.53165	1.2497	805|2775|4842|10681	CALM2|GNAO1|NOS1|GNB5	-2.1302	0	24	0	0	-8.58852	31.7959
0	1	0	0	-3.2894	0	R-HSA-400042	M010	1	0	Reactome Gene Sets	6	Adrenaline,noradrenaline inhibits insulin secretion		-3.2894	19.0775	7.19234	28133	28	158	3	1.89873	1.08578	2786|10681|59345	GNG4|GNB5|GNB4	-2.03974	0	24	0	0	-8.58852	31.7959
1	0	0	-3.27039	0	0	R-HSA-2514859	M100	1	0	Reactome Gene Sets	6	Inactivation, recovery and regulation of the phototransduction cascade		-3.27039	18.9066	7.15313	28133	36	124	3	2.41935	1.37981	805|2339|10681	CALM2|FNTA|GNB5	-2.02643	0	24	0	0	-8.58852	31.7959
0	1	1	0	-3.08577	-2.42136	hsa05167	M011	2	0	KEGG Pathway	24	kaposi sarcoma-associated herpesvirus infection		-3.25991	3.57181	4.34957	28133	194	406	10	2.46305	0.769234	637|805|2786|5533|5605|5879|6714|7314|10681|59345	BID|CALM2|GNG4|PPP3CC|MAP2K2|RAC1|SRC|UBB|GNB5|GNB4	-1.88956	0	24	0	0	-8.58852	31.7959
0	1	0	0	-3.24377	0	R-HSA-1296041	M010	1	0	Reactome Gene Sets	6	Activation of G protein gated Potassium channels		-3.24377	18.4197	7.05341	28133	29	158	3	1.89873	1.08578	2786|10681|59345	GNG4|GNB5|GNB4	-2.0064	0	24	0	0	-8.58852	31.7959
0	1	0	0	-3.24377	0	R-HSA-1296059	M010	1	0	Reactome Gene Sets	6	G protein gated Potassium channels		-3.24377	18.4197	7.05341	28133	29	158	3	1.89873	1.08578	2786|10681|59345	GNG4|GNB5|GNB4	-2.0064	0	24	0	0	-8.58852	31.7959
0	1	0	0	-3.24377	0	R-HSA-997272	M010	1	0	Reactome Gene Sets	6	Inhibition of voltage gated Ca2+ channels via Gbeta/gamma subunits		-3.24377	18.4197	7.05341	28133	29	158	3	1.89873	1.08578	2786|10681|59345	GNG4|GNB5|GNB4	-2.0064	0	24	0	0	-8.58852	31.7959
1	0	0	-3.23506	0	0	R-HSA-2514856	M100	1	0	Reactome Gene Sets	6	The phototransduction cascade		-3.23506	18.3956	7.04499	28133	37	124	3	2.41935	1.37981	805|2339|10681	CALM2|FNTA|GNB5	-2.00039	0	24	0	0	-8.58852	31.7959
0	1	0	0	-3.16907	0	hsa04014	M010	1	0	KEGG Pathway	24	Ras signaling pathway		-3.16907	4.81235	4.6322	28133	259	158	7	4.43038	1.63701	805|2786|5605|5879|5898|10681|59345	CALM2|GNG4|MAP2K2|RAC1|RALA|GNB5|GNB4	-1.95099	0	24	0	0	-8.58852	31.7959
0	1	0	0	-3.11641	0	R-HSA-397795	M010	1	0	Reactome Gene Sets	6	G-protein beta:gamma signalling		-3.11641	16.6928	6.67513	28133	32	158	3	1.89873	1.08578	2786|10681|59345	GNG4|GNB5|GNB4	-1.91345	0	24	0	0	-8.58852	31.7959
0	1	0	0	-3.0768	0	R-HSA-163359	M010	1	0	Reactome Gene Sets	6	Glucagon signaling in metabolic regulation		-3.0768	16.187	6.56024	28133	33	158	3	1.89873	1.08578	2786|5577|59345	GNG4|PRKAR2B|GNB4	-1.88757	0	24	0	0	-8.58852	31.7959
0	1	0	0	-3.0768	0	R-HSA-392518	M010	1	0	Reactome Gene Sets	6	Signal amplification		-3.0768	16.187	6.56024	28133	33	158	3	1.89873	1.08578	2786|10681|59345	GNG4|GNB5|GNB4	-1.88757	0	24	0	0	-8.58852	31.7959
0	1	0	0	-3.0768	0	R-HSA-420092	M010	1	0	Reactome Gene Sets	6	Glucagon-type ligand receptors		-3.0768	16.187	6.56024	28133	33	158	3	1.89873	1.08578	2786|10681|59345	GNG4|GNB5|GNB4	-1.88757	0	24	0	0	-8.58852	31.7959
0	1	0	0	-3.02574	0	R-HSA-9009391	M010	1	0	Reactome Gene Sets	6	Extra-nuclear estrogen signaling		-3.02574	9.24971	5.44772	28133	77	158	4	2.53165	1.2497	805|2786|10681|59345	CALM2|GNG4|GNB5|GNB4	-1.8481	0	24	0	0	-8.58852	31.7959
0	1	0	0	-3.00963	0	R-HSA-9660821	M010	1	0	Reactome Gene Sets	6	ADORA2B mediated anti-inflammatory cytokines production		-3.00963	6.64392	4.92159	28133	134	158	5	3.16456	1.39266	2781|2786|5577|10681|59345	GNAZ|GNG4|PRKAR2B|GNB5|GNB4	-1.83627	0	24	0	0	-8.58852	31.7959
0	1	0	0	-3.00134	0	R-HSA-1296065	M010	1	0	Reactome Gene Sets	6	Inwardly rectifying K+ channels		-3.00134	15.262	6.34485	28133	35	158	3	1.89873	1.08578	2786|10681|59345	GNG4|GNB5|GNB4	-1.83136	0	24	0	0	-8.58852	31.7959
0	1	0	0	-2.4023	0	ko04724	M010	1	0	KEGG Pathway	24	Glutamatergic synapse		-2.86745	4.25484	4.21374	28133	114	406	7	1.72414	0.646021	2775|2786|5533|5582|9456|10681|59345	GNAO1|GNG4|PPP3CC|PRKCG|HOMER1|GNB5|GNB4	-1.5566	0	24	0	0	-8.58852	31.7959
0	1	0	0	-2.81012	0	ko04727	M010	1	0	KEGG Pathway	24	GABAergic synapse		-2.81012	8.0935	5.00862	28133	88	158	4	2.53165	1.2497	2775|2786|10681|59345	GNAO1|GNG4|GNB5|GNB4	-1.69326	0	24	0	0	-8.58852	31.7959
0	1	0	0	-2.80828	0	R-HSA-9006931	M010	1	0	Reactome Gene Sets	6	Signaling by Nuclear Receptors		-2.80828	4.16856	4.13955	28133	299	158	7	4.43038	1.63701	348|805|2786|3020|8359|10681|59345	APOE|CALM2|GNG4|H3-3A|H4C1|GNB5|GNB4	-1.69266	0	24	0	0	-8.58852	31.7959
0	1	0	0	-2.79482	0	hsa05200	M010	1	0	KEGG Pathway	24	Pathways in cancer		-2.79482	3.09127	3.81108	28133	576	158	10	6.32911	1.93707	805|2786|3728|5605|5879|5898|7170|10681|59345|84823	CALM2|GNG4|JUP|MAP2K2|RAC1|RALA|TPM3|GNB5|GNB4|LMNB2	-1.68094	0	24	0	0	-8.58852	31.7959
0	1	0	0	-2.77588	0	R-HSA-8939211	M010	1	0	Reactome Gene Sets	6	ESR-mediated signaling		-2.77588	4.79077	4.27114	28133	223	158	6	3.79747	1.52059	805|2786|3020|8359|10681|59345	CALM2|GNG4|H3-3A|H4C1|GNB5|GNB4	-1.6669	0	24	0	0	-8.58852	31.7959
0	1	0	0	-2.75652	0	hsa04727	M010	1	0	KEGG Pathway	24	GABAergic synapse		-2.75652	7.82668	4.90196	28133	91	158	4	2.53165	1.2497	2775|2786|10681|59345	GNAO1|GNG4|GNB5|GNB4	-1.65217	0	24	0	0	-8.58852	31.7959
0	1	0	0	-2.74016	0	R-HSA-977444	M010	1	0	Reactome Gene Sets	6	GABA B receptor activation		-2.74016	12.4226	5.63334	28133	43	158	3	1.89873	1.08578	2786|10681|59345	GNG4|GNB5|GNB4	-1.64061	0	24	0	0	-8.58852	31.7959
0	1	0	0	-2.74016	0	R-HSA-991365	M010	1	0	Reactome Gene Sets	6	Activation of GABAB receptors		-2.74016	12.4226	5.63334	28133	43	158	3	1.89873	1.08578	2786|10681|59345	GNG4|GNB5|GNB4	-1.64061	0	24	0	0	-8.58852	31.7959
0	1	0	0	-2.72188	0	WP35	M010	1	0	WikiPathways	27	G Protein Signaling Pathways		-2.72188	7.65836	4.83352	28133	93	158	4	2.53165	1.2497	2775|2786|5577|10681	GNAO1|GNG4|PRKAR2B|GNB5	-1.62732	0	24	0	0	-8.58852	31.7959
0	1	1	0	-2.66156	-2.02615	GO:0006457	M011	2	0	GO Biological Processes	19	protein folding	19_GO:0009987 cellular process	-2.66156	4.54614	4.10248	28133	235	158	6	3.79747	1.52059	2775|2781|3336|10681|23071|59345	GNAO1|GNAZ|HSPE1|GNB5|ERP44|GNB4	-1.58164	0	24	0	0	-8.58852	31.7959
0	1	0	0	-2.62314	0	WP3929	M010	1	0	WikiPathways	27	Chemokine signaling pathway		-2.62314	5.42857	4.27455	28133	164	158	5	3.16456	1.39266	408|2786|5879|10681|59345	ARRB1|GNG4|RAC1|GNB5|GNB4	-1.55659	0	24	0	0	-8.58852	31.7959
0	1	0	0	-2.59128	0	ko04723	M010	1	0	KEGG Pathway	24	Retrograde endocannabinoid signaling		-2.59128	7.05176	4.57888	28133	101	158	4	2.53165	1.2497	2775|2786|10681|59345	GNAO1|GNG4|GNB5|GNB4	-1.53144	0	24	0	0	-8.58852	31.7959
0	1	0	0	-2.42918	0	ko04062	M010	1	0	KEGG Pathway	24	Chemokine signaling pathway		-2.42918	4.89167	3.95838	28133	182	158	5	3.16456	1.39266	408|2786|5879|10681|59345	ARRB1|GNG4|RAC1|GNB5|GNB4	-1.40594	0	24	0	0	-8.58852	31.7959
0	1	0	0	-2.38879	0	hsa04725	M010	1	0	KEGG Pathway	24	Cholinergic synapse		-2.38879	6.19329	4.19388	28133	115	158	4	2.53165	1.2497	2775|2786|10681|59345	GNAO1|GNG4|GNB5|GNB4	-1.37585	0	24	0	0	-8.58852	31.7959
0	1	0	0	-2.3361	0	hsa04726	M010	1	0	KEGG Pathway	24	Serotonergic synapse		-2.3361	5.98511	4.09548	28133	119	158	4	2.53165	1.2497	2775|2786|10681|59345	GNAO1|GNG4|GNB5|GNB4	-1.33607	0	24	0	0	-8.58852	31.7959
0	1	0	0	-2.32742	0	R-HSA-977443	M010	1	0	Reactome Gene Sets	6	GABA receptor activation		-2.32742	8.90285	4.60531	28133	60	158	3	1.89873	1.08578	2786|10681|59345	GNG4|GNB5|GNB4	-1.32968	0	24	0	0	-8.58852	31.7959
0	1	0	0	-2.23901	0	hsa04062	M010	1	0	KEGG Pathway	24	Chemokine signaling pathway		-2.23901	4.40735	3.65252	28133	202	158	5	3.16456	1.39266	408|2786|5879|10681|59345	ARRB1|GNG4|RAC1|GNB5|GNB4	-1.26068	0	24	0	0	-8.58852	31.7959
1	1	1	-2.58771	-2.58759	-5.3586	GO:0050804	M111	3	0	GO Biological Processes	19	modulation of chemical synaptic transmission	19_GO:0023052 signaling	-8.56373	4.14432	7.83736	28133	418	406	25	6.15764	1.19301	348|952|1000|1020|1627|2185|4137|4884|5577|5582|5786|6543|6616|6623|6714|6804|6812|7143|8499|8541|9456|9693|10211|57537|112755	APOE|CD38|CDH2|CDK5|DBN1|PTK2B|MAPT|NPTX1|PRKAR2B|PRKCG|PTPRA|SLC8A2|SNAP25|SNCG|SRC|STX1A|STXBP1|TNR|PPFIA2|PPFIA3|HOMER1|RAPGEF2|FLOT1|SORCS2|STX1B	-6.2579	0	25	1	1	-8.56373	11.5489
1	1	1	-2.58196	-2.58125	-5.34673	GO:0099177	M111	3	0	GO Biological Processes	19	regulation of trans-synaptic signaling	19_GO:0023052 signaling	-8.54273	4.13443	7.82219	28133	419	406	25	6.15764	1.19301	348|952|1000|1020|1627|2185|4137|4884|5577|5582|5786|6543|6616|6623|6714|6804|6812|7143|8499|8541|9456|9693|10211|57537|112755	APOE|CD38|CDH2|CDK5|DBN1|PTK2B|MAPT|NPTX1|PRKAR2B|PRKCG|PTPRA|SLC8A2|SNAP25|SNCG|SRC|STX1A|STXBP1|TNR|PPFIA2|PPFIA3|HOMER1|RAPGEF2|FLOT1|SORCS2|STX1B	-6.24073	0	25	0	0	-8.56373	11.5489
0	1	1	0	-2.23512	-5.19269	GO:0099537	M011	2	0	GO Biological Processes	19	trans-synaptic signaling	19_GO:0023052 signaling	-6.97085	3.00838	6.46829	28133	691	406	30	7.38916	1.29827	348|952|1000|1020|1627|2185|4137|4842|4884|5577|5582|5786|6543|6616|6623|6714|6804|6812|7143|7442|8499|8541|9456|9693|9900|10211|26059|57537|80331|112755	APOE|CD38|CDH2|CDK5|DBN1|PTK2B|MAPT|NOS1|NPTX1|PRKAR2B|PRKCG|PTPRA|SLC8A2|SNAP25|SNCG|SRC|STX1A|STXBP1|TNR|TRPV1|PPFIA2|PPFIA3|HOMER1|RAPGEF2|SV2A|FLOT1|ERC2|SORCS2|DNAJC5|STX1B	-5.04651	0	25	0	0	-8.56373	11.5489
0	1	1	0	-2.19703	-5.11635	GO:0099536	M011	2	0	GO Biological Processes	19	synaptic signaling	19_GO:0023052 signaling	-6.8501	2.9697	6.38595	28133	700	406	30	7.38916	1.29827	348|952|1000|1020|1627|2185|4137|4842|4884|5577|5582|5786|6543|6616|6623|6714|6804|6812|7143|7442|8499|8541|9456|9693|9900|10211|26059|57537|80331|112755	APOE|CD38|CDH2|CDK5|DBN1|PTK2B|MAPT|NOS1|NPTX1|PRKAR2B|PRKCG|PTPRA|SLC8A2|SNAP25|SNCG|SRC|STX1A|STXBP1|TNR|TRPV1|PPFIA2|PPFIA3|HOMER1|RAPGEF2|SV2A|FLOT1|ERC2|SORCS2|DNAJC5|STX1B	-4.95658	0	25	0	0	-8.56373	11.5489
0	0	1	0	0	-5.25301	GO:0007268	M001	1	0	GO Biological Processes	19	chemical synaptic transmission	19_GO:0023052 signaling	-6.54278	2.93787	6.20869	28133	684	406	29	7.14286	1.27815	348|952|1000|1020|1627|2185|4137|4884|5577|5582|5786|6543|6616|6623|6714|6804|6812|7143|7442|8499|8541|9456|9693|9900|10211|26059|57537|80331|112755	APOE|CD38|CDH2|CDK5|DBN1|PTK2B|MAPT|NPTX1|PRKAR2B|PRKCG|PTPRA|SLC8A2|SNAP25|SNCG|SRC|STX1A|STXBP1|TNR|TRPV1|PPFIA2|PPFIA3|HOMER1|RAPGEF2|SV2A|FLOT1|ERC2|SORCS2|DNAJC5|STX1B	-4.69975	0	25	0	0	-8.56373	11.5489
0	0	1	0	0	-5.25301	GO:0098916	M001	1	0	GO Biological Processes	19	anterograde trans-synaptic signaling	19_GO:0023052 signaling	-6.54278	2.93787	6.20869	28133	684	406	29	7.14286	1.27815	348|952|1000|1020|1627|2185|4137|4884|5577|5582|5786|6543|6616|6623|6714|6804|6812|7143|7442|8499|8541|9456|9693|9900|10211|26059|57537|80331|112755	APOE|CD38|CDH2|CDK5|DBN1|PTK2B|MAPT|NPTX1|PRKAR2B|PRKCG|PTPRA|SLC8A2|SNAP25|SNCG|SRC|STX1A|STXBP1|TNR|TRPV1|PPFIA2|PPFIA3|HOMER1|RAPGEF2|SV2A|FLOT1|ERC2|SORCS2|DNAJC5|STX1B	-4.69975	0	25	0	0	-8.56373	11.5489
1	1	1	-2.97345	-3.33344	-2.65475	GO:0048167	M111	3	0	GO Biological Processes	19	regulation of synaptic plasticity	19_GO:0023052 signaling	-5.78908	5.17707	6.68802	28133	174	406	13	3.20197	0.873733	348|952|1020|1627|2185|4137|6543|6616|6812|7143|8541|9693|57537	APOE|CD38|CDK5|DBN1|PTK2B|MAPT|SLC8A2|SNAP25|STXBP1|TNR|PPFIA3|RAPGEF2|SORCS2	-4.04613	0	25	0	0	-8.56373	11.5489
1	0	0	-3.50719	0	0	GO:0060292	M100	1	0	GO Biological Processes	19	long-term synaptic depression	19_GO:0048519 negative regulation of biological process	-4.18946	11.5489	6.99522	28133	30	406	5	1.23153	0.547354	952|2185|4137|6812|57537	CD38|PTK2B|MAPT|STXBP1|SORCS2	-2.67503	0	25	0	0	-8.56373	11.5489
1	0	0	-2.48681	0	0	GO:0050805	M100	1	0	GO Biological Processes	19	negative regulation of synaptic transmission	19_GO:0048519 negative regulation of biological process	-3.38348	6.20535	5.1619	28133	67	406	6	1.47783	0.598848	952|2185|4137|6812|7143|57537	CD38|PTK2B|MAPT|STXBP1|TNR|SORCS2	-1.99446	0	25	0	0	-8.56373	11.5489
0	1	0	0	-2.15836	0	GO:0051966	M010	1	0	GO Biological Processes	19	regulation of synaptic transmission, glutamatergic	19_GO:0023052 signaling	-3.31435	6.02549	5.05755	28133	69	406	6	1.47783	0.598848	1000|1020|2185|6812|7143|9456	CDH2|CDK5|PTK2B|STXBP1|TNR|HOMER1	-1.93545	0	25	0	0	-8.56373	11.5489
1	1	1	-3.99655	-4.1414	-6.01321	GO:0030155	M111	3	0	GO Biological Processes	19	regulation of cell adhesion	19_GO:0022610 biological adhesion	-8.53097	3.20976	7.34071	28133	734	406	34	8.37438	1.37474	102|445|960|1012|2039|2185|2244|2934|3146|3371|3728|4035|4860|5361|5786|5879|5962|6251|6714|7070|7082|7143|7264|7402|7525|8546|8826|8943|9647|10211|23122|23499|23654|140885	ADAM10|ASS1|CD44|CDH13|DMTN|PTK2B|FGB|GSN|HMGB1|TNC|JUP|LRP1|PNP|PLXNA1|PTPRA|RAC1|RDX|RSU1|SRC|THY1|TJP1|TNR|GFUS|UTRN|YES1|AP3B1|IQGAP1|AP3D1|PPM1F|FLOT1|CLASP2|MACF1|PLXNB2|SIRPA	-6.23276	0	26	1	1	-8.53097	8.04873
1	1	1	-2.54778	-3.15604	-5.27625	GO:0045785	M111	3	0	GO Biological Processes	19	positive regulation of cell adhesion	19_GO:0022610 biological adhesion	-6.51359	3.58694	6.50264	28133	425	406	22	5.41872	1.12354	960|1012|2039|2185|2244|3146|3728|4860|5879|6251|6714|7070|7082|7264|7402|7525|8546|8826|8943|9647|10211|140885	CD44|CDH13|DMTN|PTK2B|FGB|HMGB1|JUP|PNP|RAC1|RSU1|SRC|THY1|TJP1|GFUS|UTRN|YES1|AP3B1|IQGAP1|AP3D1|PPM1F|FLOT1|SIRPA	-4.67582	0	26	0	0	-8.53097	8.04873
1	1	1	-2.11597	-2.31938	-3.5505	GO:0022409	M111	3	0	GO Biological Processes	19	positive regulation of cell-cell adhesion	19_GO:0022610 biological adhesion	-4.26336	3.51487	5.08059	28133	276	406	14	3.44828	0.905562	960|2039|2244|3146|4860|5879|6714|7070|7082|7525|8546|8943|10211|140885	CD44|DMTN|FGB|HMGB1|PNP|RAC1|SRC|THY1|TJP1|YES1|AP3B1|AP3D1|FLOT1|SIRPA	-2.7376	0	26	0	0	-8.53097	8.04873
0	0	1	0	0	-3.23675	GO:0022407	M001	1	0	GO Biological Processes	19	regulation of cell-cell adhesion	19_GO:0022610 biological adhesion	-4.09195	2.84118	4.70486	28133	439	406	18	4.4335	1.02156	445|960|2039|2244|3146|4860|5879|5962|6714|7070|7082|7143|7525|8546|8943|9647|10211|140885	ASS1|CD44|DMTN|FGB|HMGB1|PNP|RAC1|RDX|SRC|THY1|TJP1|TNR|YES1|AP3B1|AP3D1|PPM1F|FLOT1|SIRPA	-2.59577	0	26	0	0	-8.53097	8.04873
0	0	1	0	0	-3.63571	GO:0050870	M001	1	0	GO Biological Processes	19	positive regulation of T cell activation	19_GO:0022610 biological adhesion	-3.63571	4.96085	5.06814	28133	212	214	8	3.73832	1.29676	3146|4860|5879|6714|7070|8546|8943|140885	HMGB1|PNP|RAC1|SRC|THY1|AP3B1|AP3D1|SIRPA	-2.29217	0	26	0	0	-8.53097	8.04873
0	0	1	0	0	-3.34874	GO:1903039	M001	1	0	GO Biological Processes	19	positive regulation of leukocyte cell-cell adhesion	19_GO:0022610 biological adhesion	-3.34874	4.49445	4.69948	28133	234	214	8	3.73832	1.29676	3146|4860|5879|6714|7070|8546|8943|140885	HMGB1|PNP|RAC1|SRC|THY1|AP3B1|AP3D1|SIRPA	-2.08267	0	26	0	0	-8.53097	8.04873
0	0	1	0	0	-3.01326	GO:0050863	M001	1	0	GO Biological Processes	19	regulation of T cell activation	19_GO:0002376 immune system process	-3.01326	3.60721	4.15823	28133	328	214	9	4.20561	1.37207	3146|4860|5879|6647|6714|7070|8546|8943|140885	HMGB1|PNP|RAC1|SOD1|SRC|THY1|AP3B1|AP3D1|SIRPA	-1.83764	0	26	0	0	-8.53097	8.04873
0	0	1	0	0	-2.95862	GO:0042110	M001	1	0	GO Biological Processes	19	T cell activation	19_GO:0002376 immune system process	-2.95862	3.0444	3.93422	28133	475	214	11	5.14019	1.50947	3146|4860|5591|5879|6647|6714|7070|8546|8943|23705|140885	HMGB1|PNP|PRKDC|RAC1|SOD1|SRC|THY1|AP3B1|AP3D1|CADM1|SIRPA	-1.80029	0	26	0	0	-8.53097	8.04873
0	0	1	0	0	-2.86301	GO:0050867	M001	1	0	GO Biological Processes	19	positive regulation of cell activation	19_GO:0048518 positive regulation of biological process	-2.86301	3.16777	3.89506	28133	415	214	10	4.6729	1.44276	2039|3146|4860|5591|5879|6714|7070|8546|8943|140885	DMTN|HMGB1|PNP|PRKDC|RAC1|SRC|THY1|AP3B1|AP3D1|SIRPA	-1.73302	0	26	0	0	-8.53097	8.04873
0	0	1	0	0	-2.76799	GO:0051251	M001	1	0	GO Biological Processes	19	positive regulation of lymphocyte activation	19_GO:0002376 immune system process	-2.76799	3.32349	3.86261	28133	356	214	9	4.20561	1.37207	3146|4860|5591|5879|6714|7070|8546|8943|140885	HMGB1|PNP|PRKDC|RAC1|SRC|THY1|AP3B1|AP3D1|SIRPA	-1.6617	0	26	0	0	-8.53097	8.04873
0	0	1	0	0	-2.7656	GO:0046637	M001	1	0	GO Biological Processes	19	regulation of alpha-beta T cell differentiation	19_GO:0002376 immune system process	-2.7656	7.84851	4.91361	28133	67	214	4	1.86916	0.925804	3146|4860|8546|8943	HMGB1|PNP|AP3B1|AP3D1	-1.66051	0	26	0	0	-8.53097	8.04873
0	0	1	0	0	-2.68658	GO:0007159	M001	1	0	GO Biological Processes	19	leukocyte cell-cell adhesion	19_GO:0022610 biological adhesion	-2.68658	3.23269	3.7641	28133	366	214	9	4.20561	1.37207	3146|4860|5879|6714|7070|7430|8546|8943|140885	HMGB1|PNP|RAC1|SRC|THY1|EZR|AP3B1|AP3D1|SIRPA	-1.6016	0	26	0	0	-8.53097	8.04873
0	0	1	0	0	-2.61768	GO:0045619	M001	1	0	GO Biological Processes	19	regulation of lymphocyte differentiation	19_GO:0002376 immune system process	-2.61768	4.45636	4.03855	28133	177	214	6	2.80374	1.12846	3146|4860|5591|6647|8546|8943	HMGB1|PNP|PRKDC|SOD1|AP3B1|AP3D1	-1.55214	0	26	0	0	-8.53097	8.04873
0	0	1	0	0	-2.43896	GO:0050865	M001	1	0	GO Biological Processes	19	regulation of cell activation	19_GO:0050789 regulation of biological process	-2.6088	2.07008	3.30303	28133	636	406	19	4.6798	1.0482	348|952|2039|2934|3146|4282|4345|4860|5591|5879|6647|6714|6812|7070|7525|8546|8943|140885|399687	APOE|CD38|DMTN|GSN|HMGB1|MIF|CD200|PNP|PRKDC|RAC1|SOD1|SRC|STXBP1|THY1|YES1|AP3B1|AP3D1|SIRPA|MYO18A	-1.33555	0	26	0	0	-8.53097	8.04873
1	0	1	-2.0542	0	-2.42396	GO:0002696	M101	2	0	GO Biological Processes	19	positive regulation of leukocyte activation	19_GO:0002376 immune system process	-2.42396	2.95053	3.44423	28133	401	214	9	4.20561	1.37207	3146|4860|5591|5879|6714|7070|8546|8943|140885	HMGB1|PNP|PRKDC|RAC1|SRC|THY1|AP3B1|AP3D1|SIRPA	-1.40231	0	26	0	0	-8.53097	8.04873
0	0	1	0	0	-2.40642	GO:1903037	M001	1	0	GO Biological Processes	19	regulation of leukocyte cell-cell adhesion	19_GO:0022610 biological adhesion	-2.40642	3.18697	3.49874	28133	330	214	8	3.73832	1.29676	3146|4860|5879|6714|7070|8546|8943|140885	HMGB1|PNP|RAC1|SRC|THY1|AP3B1|AP3D1|SIRPA	-1.38756	0	26	0	0	-8.53097	8.04873
0	0	1	0	0	-2.25317	GO:0045580	M001	1	0	GO Biological Processes	19	regulation of T cell differentiation	19_GO:0002376 immune system process	-2.25317	4.4413	3.67493	28133	148	214	5	2.33645	1.03261	3146|4860|6647|8546|8943	HMGB1|PNP|SOD1|AP3B1|AP3D1	-1.27157	0	26	0	0	-8.53097	8.04873
0	0	1	0	0	-2.23283	GO:0051249	M001	1	0	GO Biological Processes	19	regulation of lymphocyte activation	19_GO:0002376 immune system process	-2.23283	2.58276	3.15492	28133	509	214	10	4.6729	1.44276	3146|4860|5591|5879|6647|6714|7070|8546|8943|140885	HMGB1|PNP|PRKDC|RAC1|SOD1|SRC|THY1|AP3B1|AP3D1|SIRPA	-1.25648	0	26	0	0	-8.53097	8.04873
0	0	1	0	0	-2.20889	GO:0046638	M001	1	0	GO Biological Processes	19	positive regulation of alpha-beta T cell differentiation	19_GO:0022610 biological adhesion	-2.20889	8.04873	4.32351	28133	49	214	3	1.40187	0.803676	4860|8546|8943	PNP|AP3B1|AP3D1	-1.23879	0	26	0	0	-8.53097	8.04873
0	0	1	0	0	-2.20247	GO:0002694	M001	1	0	GO Biological Processes	19	regulation of leukocyte activation	19_GO:0002376 immune system process	-2.20247	2.42226	3.0752	28133	597	214	11	5.14019	1.50947	3146|4345|4860|5591|5879|6647|6714|7070|8546|8943|140885	HMGB1|CD200|PNP|PRKDC|RAC1|SOD1|SRC|THY1|AP3B1|AP3D1|SIRPA	-1.23362	0	26	0	0	-8.53097	8.04873
0	0	1	0	0	-2.1356	GO:1902107	M001	1	0	GO Biological Processes	19	positive regulation of leukocyte differentiation	19_GO:0002376 immune system process	-2.1356	4.16021	3.48752	28133	158	214	5	2.33645	1.03261	3146|4860|5591|8546|8943	HMGB1|PNP|PRKDC|AP3B1|AP3D1	-1.18443	0	26	0	0	-8.53097	8.04873
0	0	1	0	0	-2.12592	GO:0046634	M001	1	0	GO Biological Processes	19	regulation of alpha-beta T cell activation	19_GO:0002376 immune system process	-2.12592	5.20644	3.70771	28133	101	214	4	1.86916	0.925804	3146|4860|8546|8943	HMGB1|PNP|AP3B1|AP3D1	-1.17661	0	26	0	0	-8.53097	8.04873
0	0	1	0	0	-2.09643	GO:0045621	M001	1	0	GO Biological Processes	19	positive regulation of lymphocyte differentiation	19_GO:0002376 immune system process	-2.09643	5.10534	3.65438	28133	103	214	4	1.86916	0.925804	4860|5591|8546|8943	PNP|PRKDC|AP3B1|AP3D1	-1.15449	0	26	0	0	-8.53097	8.04873
0	0	1	0	0	-2.03943	GO:0046632	M001	1	0	GO Biological Processes	19	alpha-beta T cell differentiation	19_GO:0002376 immune system process	-2.03943	4.91449	3.55176	28133	107	214	4	1.86916	0.925804	3146|4860|8546|8943	HMGB1|PNP|AP3B1|AP3D1	-1.1114	0	26	0	0	-8.53097	8.04873
0	1	1	0	-4.55565	-6.03511	GO:0032386	M011	2	0	GO Biological Processes	19	regulation of intracellular transport	19_GO:0051179 localization	-8.50093	4.11479	7.79198	28133	421	406	25	6.15764	1.19301	88|1020|1778|2039|3728|4924|5582|5605|5936|5962|6714|6804|6812|7332|7430|7874|7905|8499|10134|10155|10204|23209|57506|65009|112755	ACTN2|CDK5|DYNC1H1|DMTN|JUP|NUCB1|PRKCG|MAP2K2|RBM4|RDX|SRC|STX1A|STXBP1|UBE2L3|EZR|USP7|REEP5|PPFIA2|BCAP31|TRIM28|NUTF2|MLC1|MAVS|NDRG4|STX1B	-6.22814	0	27	1	1	-8.50093	4.13216
0	1	1	0	-4.8706	-4.68697	GO:1903827	M011	2	0	GO Biological Processes	19	regulation of cellular protein localization	19_GO:0051179 localization	-6.89391	3.30573	6.57745	28133	545	406	26	6.40394	1.21504	88|102|493|637|1000|1020|2039|2817|2934|3728|4035|4137|4924|5300|5533|5962|6714|7332|7430|8826|9201|9647|10134|10155|10204|57506	ACTN2|ADAM10|ATP2B4|BID|CDH2|CDK5|DMTN|GPC1|GSN|JUP|LRP1|MAPT|NUCB1|PIN1|PPP3CC|RDX|SRC|UBE2L3|EZR|IQGAP1|DCLK1|PPM1F|BCAP31|TRIM28|NUTF2|MAVS	-4.98985	0	27	0	0	-8.50093	4.13216
0	1	1	0	-3.61689	-2.17834	GO:0032388	M011	2	0	GO Biological Processes	19	positive regulation of intracellular transport	19_GO:0048518 positive regulation of biological process	-4.72272	4.13216	5.61778	28133	218	406	13	3.20197	0.873733	88|1020|1778|3728|5962|6812|7332|7430|10134|10155|10204|23209|57506	ACTN2|CDK5|DYNC1H1|JUP|RDX|STXBP1|UBE2L3|EZR|BCAP31|TRIM28|NUTF2|MLC1|MAVS	-3.13171	0	27	0	0	-8.50093	4.13216
0	1	1	0	-3.15328	-2.90486	GO:1903829	M011	2	0	GO Biological Processes	19	positive regulation of cellular protein localization	19_GO:0048518 positive regulation of biological process	-4.39464	3.26085	5.07523	28133	340	406	16	3.94089	0.965613	493|637|1020|3728|4035|4137|5533|5962|6714|7332|7430|8826|10134|10155|10204|57506	ATP2B4|BID|CDK5|JUP|LRP1|MAPT|PPP3CC|RDX|SRC|UBE2L3|EZR|IQGAP1|BCAP31|TRIM28|NUTF2|MAVS	-2.84865	0	27	0	0	-8.50093	4.13216
0	1	0	0	-2.20118	0	GO:1900180	M010	1	0	GO Biological Processes	19	regulation of protein localization to nucleus	19_GO:0051179 localization	-2.5428	3.73117	3.77685	28133	130	406	7	1.72414	0.646021	3728|5300|6714|9201|10155|10204|57506	JUP|PIN1|SRC|DCLK1|TRIM28|NUTF2|MAVS	-1.28011	0	27	0	0	-8.50093	4.13216
0	1	1	0	-2.21289	-6.17337	R-HSA-1500931	M011	2	0	Reactome Gene Sets	6	Cell-Cell communication		-8.2295	7.52018	8.98166	28133	129	406	14	3.44828	0.905562	88|1000|1012|2185|2318|3691|3728|5339|6251|6714|8826|23705|57863|140885	ACTN2|CDH2|CDH13|PTK2B|FLNC|ITGB4|JUP|PLEC|RSU1|SRC|IQGAP1|CADM1|CADM3|SIRPA	-6.03494	0	28	1	1	-8.2295	10.499
0	1	1	0	-3.63199	-4.62599	hsa04514	M011	2	0	KEGG Pathway	24	Cell adhesion molecules		-5.60902	5.43475	6.65584	28133	153	406	12	2.95567	0.840523	214|1000|2775|3696|4685|9369|23114|23705|26047|57863|94030|257194	ALCAM|CDH2|GNAO1|ITGB8|NCAM2|NRXN3|NFASC|CADM1|CNTNAP2|CADM3|LRRC4B|NEGR1	-3.90042	0	28	0	0	-8.2295	10.499
0	1	1	0	-2.75652	-2.2845	R-HSA-446728	M011	2	0	Reactome Gene Sets	6	Cell junction organization		-5.16363	6.85316	6.76735	28133	91	406	9	2.21675	0.73068	1000|1012|2318|3691|3728|5339|6251|23705|57863	CDH2|CDH13|FLNC|ITGB4|JUP|PLEC|RSU1|CADM1|CADM3	-3.51653	0	28	0	0	-8.2295	10.499
0	1	1	0	-2.87048	-4.81643	ko04514	M011	2	0	KEGG Pathway	24	Cell adhesion molecules (CAMs)		-5.08055	5.29322	6.25004	28133	144	406	11	2.70936	0.80576	214|1000|3696|4685|9369|23114|23705|26047|57863|94030|257194	ALCAM|CDH2|ITGB8|NCAM2|NRXN3|NFASC|CADM1|CNTNAP2|CADM3|LRRC4B|NEGR1	-3.44592	0	28	0	0	-8.2295	10.499
0	0	1	0	0	-2.69872	R-HSA-418990	M001	1	0	Reactome Gene Sets	6	Adherens junctions interactions		-3.98337	10.499	6.60681	28133	33	406	5	1.23153	0.547354	1000|1012|3728|23705|57863	CDH2|CDH13|JUP|CADM1|CADM3	-2.50183	0	28	0	0	-8.2295	10.499
0	0	1	0	0	-2.25953	GO:0007157	M001	1	0	GO Biological Processes	19	heterophilic cell-cell adhesion via plasma membrane cell adhesion molecules	19_GO:0022610 biological adhesion	-2.3304	5.89729	4.06604	28133	47	406	4	0.985222	0.490178	214|1000|23705|57863	ALCAM|CDH2|CADM1|CADM3	-1.09633	0	28	0	0	-8.2295	10.499
0	1	1	0	-5.86529	-5.22321	GO:0098662	M011	2	0	GO Biological Processes	19	inorganic cation transmembrane transport	19_GO:0051179 localization	-8.19615	3.11224	7.12883	28133	757	406	34	8.37438	1.37474	88|358|478|493|513|515|521|534|781|805|1020|1340|1347|1528|1804|2185|2631|4842|5250|6520|6543|6616|7070|7402|7442|9377|9551|10632|10681|11331|30845|51382|51606|53826	ACTN2|AQP1|ATP1A3|ATP2B4|ATP5F1D|ATP5PB|ATP5ME|ATP6V1G2|CACNA2D1|CALM2|CDK5|COX6B1|COX7A2|CYB5A|DPP6|PTK2B|NIPSNAP2|NOS1|SLC25A3|SLC3A2|SLC8A2|SNAP25|THY1|UTRN|TRPV1|COX5A|ATP5MF|ATP5MG|GNB5|PHB2|EHD3|ATP6V1D|ATP6V1H|FXYD6	-6.01043	0	29	1	1	-8.19615	6.62036
1	1	1	-2.28273	-4.50783	-3.68281	GO:1902600	M111	3	0	GO Biological Processes	19	proton transmembrane transport	19_GO:0051179 localization	-8.00821	6.62036	8.54541	28133	157	406	15	3.69458	0.936149	478|513|515|521|534|1340|1347|1528|5250|9377|9551|10632|11331|51382|51606	ATP1A3|ATP5F1D|ATP5PB|ATP5ME|ATP6V1G2|COX6B1|COX7A2|CYB5A|SLC25A3|COX5A|ATP5MF|ATP5MG|PHB2|ATP6V1D|ATP6V1H	-5.85882	0	29	0	0	-8.19615	6.62036
0	1	1	0	-3.62169	-4.76144	GO:0015672	M011	2	0	GO Biological Processes	19	monovalent inorganic cation transport	19_GO:0051179 localization	-7.0191	3.35497	6.66748	28133	537	406	26	6.40394	1.21504	88|358|478|493|513|515|521|534|1340|1347|1528|1804|2185|4842|5250|6520|6543|6616|7402|9377|9551|10632|11331|51382|51606|53826	ACTN2|AQP1|ATP1A3|ATP2B4|ATP5F1D|ATP5PB|ATP5ME|ATP6V1G2|COX6B1|COX7A2|CYB5A|DPP6|PTK2B|NOS1|SLC25A3|SLC3A2|SLC8A2|SNAP25|UTRN|COX5A|ATP5MF|ATP5MG|PHB2|ATP6V1D|ATP6V1H|FXYD6	-5.08015	0	29	0	0	-8.19615	6.62036
1	1	1	-4.03001	-6.79258	-2.39842	R-HSA-382551	M111	3	0	Reactome Gene Sets	6	Transport of small molecules		-8.06579	3.14103	7.08249	28133	728	406	33	8.12808	1.3562	291|293|348|358|478|493|534|805|1175|1211|2039|2786|5577|5683|5692|5700|5701|5710|5711|5716|5718|6520|6543|7314|7442|9491|10681|11331|51382|51606|53826|59345|79751	SLC25A4|SLC25A6|APOE|AQP1|ATP1A3|ATP2B4|ATP6V1G2|CALM2|AP2S1|CLTA|DMTN|GNG4|PRKAR2B|PSMA2|PSMB4|PSMC1|PSMC2|PSMD4|PSMD5|PSMD10|PSMD12|SLC3A2|SLC8A2|UBB|TRPV1|PSMF1|GNB5|PHB2|ATP6V1D|ATP6V1H|FXYD6|GNB4|SLC25A22	-5.90828	0	30	1	1	-8.06579	3.37102
0	1	0	0	-2.39909	0	R-HSA-983712	M010	1	0	Reactome Gene Sets	6	Ion channel transport		-2.81289	3.37102	3.91523	28133	185	406	9	2.21675	0.73068	478|493|534|805|7314|7442|51382|51606|53826	ATP1A3|ATP2B4|ATP6V1G2|CALM2|UBB|TRPV1|ATP6V1D|ATP6V1H|FXYD6	-1.51089	0	30	0	0	-8.06579	3.37102
1	1	1	-3.12804	-6.04308	-4.12657	R-HSA-2682334	M111	3	0	Reactome Gene Sets	6	EPH-Ephrin signaling		-8.05023	9.03823	9.34479	28133	92	406	12	2.95567	0.840523	102|1175|1211|1212|4629|4637|5879|6714|7525|10095|10096|79784	ADAM10|AP2S1|CLTA|CLTB|MYH11|MYL6|RAC1|SRC|YES1|ARPC1B|ACTR3|MYH14	-5.89815	0	31	1	1	-8.05023	20.7573
0	1	1	0	-3.71027	-4.36706	R-HSA-3928665	M011	2	0	Reactome Gene Sets	6	EPH-ephrin mediated repulsion of cells		-5.08126	9.51082	7.3613	28133	51	406	7	1.72414	0.646021	102|1175|1211|1212|5879|6714|7525	ADAM10|AP2S1|CLTA|CLTB|RAC1|SRC|YES1	-3.44592	0	31	0	0	-8.05023	20.7573
0	0	1	0	0	-3.73381	R-HSA-5099900	M001	1	0	Reactome Gene Sets	6	WNT5A-dependent internalization of FZD4		-4.28878	18.4782	8.19334	28133	15	406	4	0.985222	0.490178	1175|1211|1212|5582	AP2S1|CLTA|CLTB|PRKCG	-2.75837	0	31	0	0	-8.05023	20.7573
0	0	1	0	0	-3.34739	GO:0072583	M001	1	0	GO Biological Processes	19	clathrin-dependent endocytosis	19_GO:0051179 localization	-4.24647	8.84593	6.51419	28133	47	406	6	1.47783	0.598848	1175|1211|1212|29978|60682|84251	AP2S1|CLTA|CLTB|UBQLN2|SMAP1|SGIP1	-2.72326	0	31	0	0	-8.05023	20.7573
0	0	1	0	0	-3.48744	GO:0048268	M001	1	0	GO Biological Processes	19	clathrin coat assembly	19_GO:0071840 cellular component organization or biogenesis	-3.95309	15.3985	7.39427	28133	18	406	4	0.985222	0.490178	1175|1211|1212|84251	AP2S1|CLTA|CLTB|SGIP1	-2.47841	0	31	0	0	-8.05023	20.7573
0	0	1	0	0	-2.87882	R-HSA-8856825	M001	1	0	Reactome Gene Sets	6	Cargo recognition for clathrin-mediated endocytosis		-3.81092	5.22967	5.27938	28133	106	406	8	1.97044	0.689759	408|1175|1211|1212|2873|7314|29978|84251	ARRB1|AP2S1|CLTA|CLTB|GPS1|UBB|UBQLN2|SGIP1	-2.35782	0	31	0	0	-8.05023	20.7573
0	1	1	0	-2.02713	-2.27785	R-HSA-8856828	M011	2	0	Reactome Gene Sets	6	Clathrin-mediated endocytosis		-3.54922	4.27149	4.79575	28133	146	406	9	2.21675	0.73068	408|1175|1211|1212|2873|7314|10096|29978|84251	ARRB1|AP2S1|CLTA|CLTB|GPS1|UBB|ACTR3|UBQLN2|SGIP1	-2.13627	0	31	0	0	-8.05023	20.7573
0	0	1	0	0	-3.41525	M243	M001	1	0	Canonical Pathways	11	PID ARF 3PATHWAY		-3.41525	20.7573	7.54222	28133	19	214	3	1.40187	0.803676	1211|1212|5879	CLTA|CLTB|RAC1	-2.13335	0	31	0	0	-8.05023	20.7573
0	0	1	0	0	-2.25953	ko04961	M001	1	0	KEGG Pathway	24	Endocrine and other factor-regulated calcium reabsorption		-3.24476	7.37161	5.29011	28133	47	406	5	1.23153	0.547354	478|1175|1211|1212|5582	ATP1A3|AP2S1|CLTA|CLTB|PRKCG	-1.87797	0	31	0	0	-8.05023	20.7573
0	0	1	0	0	-2.50582	WP4217	M001	1	0	WikiPathways	27	Ebola Virus Pathway on Host		-3.23167	4.29725	4.54201	28133	129	406	8	1.97044	0.689759	1211|1212|2317|2318|2934|5879|8575|8826	CLTA|CLTB|FLNB|FLNC|GSN|RAC1|PRKRA|IQGAP1	-1.86576	0	31	0	0	-8.05023	20.7573
0	0	1	0	0	-2.18442	hsa04961	M001	1	0	KEGG Pathway	24	Endocrine and other factor-regulated calcium reabsorption		-3.11983	6.92931	5.07784	28133	50	406	5	1.23153	0.547354	478|1175|1211|1212|5582	ATP1A3|AP2S1|CLTA|CLTB|PRKCG	-1.77377	0	31	0	0	-8.05023	20.7573
0	0	1	0	0	-2.56493	ko05100	M001	1	0	KEGG Pathway	24	Bacterial invasion of epithelial cells		-2.56493	6.91909	4.52374	28133	76	214	4	1.86916	0.925804	1211|1212|5879|6714	CLTA|CLTB|RAC1|SRC	-1.51184	0	31	0	0	-8.05023	20.7573
0	0	1	0	0	-2.38976	hsa05100	M001	1	0	KEGG Pathway	24	Bacterial invasion of epithelial cells		-2.38976	6.18648	4.19265	28133	85	214	4	1.86916	0.925804	1211|1212|5879|6714	CLTA|CLTB|RAC1|SRC	-1.37585	0	31	0	0	-8.05023	20.7573
1	1	1	-2.94993	-4.72143	-4.43985	GO:1903362	M111	3	0	GO Biological Processes	19	regulation of cellular protein catabolic process	19_GO:0050789 regulation of biological process	-7.94576	5.00597	7.89821	28133	263	406	19	4.6798	1.0482	210|348|2185|4035|5582|5700|5701|5716|5886|5962|6923|7314|7430|7874|9491|10134|29978|55737|57095	ALAD|APOE|PTK2B|LRP1|PRKCG|PSMC1|PSMC2|PSMD10|RAD23A|RDX|ELOB|UBB|EZR|USP7|PSMF1|BCAP31|UBQLN2|VPS35|PITHD1	-5.80535	0	32	1	1	-7.94576	5.84942
1	1	1	-3.42485	-4.07482	-3.62189	GO:0042176	M111	3	0	GO Biological Processes	19	regulation of protein catabolic process	19_GO:0050789 regulation of biological process	-6.43268	3.68394	6.50048	28133	395	406	21	5.17241	1.09913	210|348|2185|2670|4035|5300|5582|5700|5701|5716|5886|5962|6923|7314|7430|7874|9491|10134|29978|55737|57095	ALAD|APOE|PTK2B|GFAP|LRP1|PIN1|PRKCG|PSMC1|PSMC2|PSMD10|RAD23A|RDX|ELOB|UBB|EZR|USP7|PSMF1|BCAP31|UBQLN2|VPS35|PITHD1	-4.60653	0	32	0	0	-7.94576	5.84942
0	1	1	0	-3.61673	-3.73431	GO:1903364	M011	2	0	GO Biological Processes	19	positive regulation of cellular protein catabolic process	19_GO:0048518 positive regulation of biological process	-6.3924	5.84942	7.30207	28133	154	406	13	3.20197	0.873733	348|2185|4035|5700|5701|5716|5886|5962|6923|7430|10134|29978|55737	APOE|PTK2B|LRP1|PSMC1|PSMC2|PSMD10|RAD23A|RDX|ELOB|EZR|BCAP31|UBQLN2|VPS35	-4.56752	0	32	0	0	-7.94576	5.84942
1	1	1	-3.64509	-3.08577	-3.13049	GO:0061136	M111	3	0	GO Biological Processes	19	regulation of proteasomal protein catabolic process	19_GO:0050789 regulation of biological process	-6.00739	5.00053	6.76589	28133	194	406	14	3.44828	0.905562	210|348|5582|5700|5701|5716|5886|6923|7314|7874|9491|10134|29978|57095	ALAD|APOE|PRKCG|PSMC1|PSMC2|PSMD10|RAD23A|ELOB|UBB|USP7|PSMF1|BCAP31|UBQLN2|PITHD1	-4.23843	0	32	0	0	-7.94576	5.84942
1	1	1	-3.27184	-2.72736	-3.4236	GO:1903050	M111	3	0	GO Biological Processes	19	regulation of proteolysis involved in cellular protein catabolic process	19_GO:0050789 regulation of biological process	-5.88497	4.55876	6.52885	28133	228	406	15	3.69458	0.936149	210|348|2185|5582|5700|5701|5716|5886|6923|7314|7874|9491|10134|29978|57095	ALAD|APOE|PTK2B|PRKCG|PSMC1|PSMC2|PSMD10|RAD23A|ELOB|UBB|USP7|PSMF1|BCAP31|UBQLN2|PITHD1	-4.12486	0	32	0	0	-7.94576	5.84942
0	1	1	0	-2.7188	-2.99857	GO:0031331	M011	2	0	GO Biological Processes	19	positive regulation of cellular catabolic process	19_GO:0048518 positive regulation of biological process	-5.19743	3.30796	5.61136	28133	398	406	19	4.6798	1.0482	348|2185|3146|4035|5208|5700|5701|5716|5886|5962|6923|7430|8396|8570|10134|11331|29978|54832|55737	APOE|PTK2B|HMGB1|LRP1|PFKFB2|PSMC1|PSMC2|PSMD10|RAD23A|RDX|ELOB|EZR|PIP4K2B|KHSRP|BCAP31|PHB2|UBQLN2|VPS13C|VPS35	-3.54779	0	32	0	0	-7.94576	5.84942
0	1	1	0	-2.71781	-2.7154	GO:0045732	M011	2	0	GO Biological Processes	19	positive regulation of protein catabolic process	19_GO:0048518 positive regulation of biological process	-4.4988	3.93367	5.39396	28133	229	406	13	3.20197	0.873733	348|2185|4035|5700|5701|5716|5886|5962|6923|7430|10134|29978|55737	APOE|PTK2B|LRP1|PSMC1|PSMC2|PSMD10|RAD23A|RDX|ELOB|EZR|BCAP31|UBQLN2|VPS35	-2.93855	0	32	0	0	-7.94576	5.84942
0	1	1	0	-2.33183	-2.53175	GO:0009896	M011	2	0	GO Biological Processes	19	positive regulation of catabolic process	19_GO:0048518 positive regulation of biological process	-4.31722	2.8559	4.86179	28133	461	406	19	4.6798	1.0482	348|2185|3146|4035|5208|5700|5701|5716|5886|5962|6923|7430|8396|8570|10134|11331|29978|54832|55737	APOE|PTK2B|HMGB1|LRP1|PFKFB2|PSMC1|PSMC2|PSMD10|RAD23A|RDX|ELOB|EZR|PIP4K2B|KHSRP|BCAP31|PHB2|UBQLN2|VPS13C|VPS35	-2.78179	0	32	0	0	-7.94576	5.84942
0	0	1	0	0	-2.47717	GO:1903052	M001	1	0	GO Biological Processes	19	positive regulation of proteolysis involved in cellular protein catabolic process	19_GO:0048518 positive regulation of biological process	-3.18751	4.23164	4.48617	28133	131	406	8	1.97044	0.689759	2185|5700|5701|5716|5886|6923|10134|29978	PTK2B|PSMC1|PSMC2|PSMD10|RAD23A|ELOB|BCAP31|UBQLN2	-1.82991	0	32	0	0	-7.94576	5.84942
0	0	1	0	0	-2.05344	GO:2000060	M001	1	0	GO Biological Processes	19	positive regulation of ubiquitin-dependent protein catabolic process	19_GO:0048518 positive regulation of biological process	-2.35414	3.92225	3.64749	28133	106	406	6	1.47783	0.598848	2185|5716|5886|6923|10134|29978	PTK2B|PSMD10|RAD23A|ELOB|BCAP31|UBQLN2	-1.11614	0	32	0	0	-7.94576	5.84942
0	1	1	0	-4.86205	-3.97704	GO:0030031	M011	2	0	GO Biological Processes	19	cell projection assembly	19_GO:0071840 cellular component organization or biogenesis	-7.8535	3.29967	7.06412	28133	630	406	30	7.38916	1.29827	88|822|1012|1778|2039|2596|2934|3691|3983|4134|5064|5217|5577|5879|5898|5962|6714|7430|9693|10096|10383|10787|11258|22919|23043|30845|51382|92154|203068|375790	ACTN2|CAPG|CDH13|DYNC1H1|DMTN|GAP43|GSN|ITGB4|ABLIM1|MAP4|PALM|PFN2|PRKAR2B|RAC1|RALA|RDX|SRC|EZR|RAPGEF2|ACTR3|TUBB4B|NCKAP1|DCTN3|MAPRE1|TNIK|EHD3|ATP6V1D|MTSS2|TUBB|AGRN	-5.74585	0	33	1	1	-7.8535	5.93941
0	1	1	0	-4.97087	-3.02931	GO:0120031	M011	2	0	GO Biological Processes	19	plasma membrane bounded cell projection assembly	19_GO:0071840 cellular component organization or biogenesis	-6.9467	3.14969	6.52795	28133	616	406	28	6.89655	1.25758	88|1012|1778|2039|2596|2934|3691|3983|4134|5064|5217|5577|5879|5898|5962|7430|9693|10096|10383|10787|11258|22919|23043|30845|51382|92154|203068|375790	ACTN2|CDH13|DYNC1H1|DMTN|GAP43|GSN|ITGB4|ABLIM1|MAP4|PALM|PFN2|PRKAR2B|RAC1|RALA|RDX|EZR|RAPGEF2|ACTR3|TUBB4B|NCKAP1|DCTN3|MAPRE1|TNIK|EHD3|ATP6V1D|MTSS2|TUBB|AGRN	-5.03362	0	33	0	0	-7.8535	5.93941
0	1	1	0	-3.24312	-3.30888	GO:0022406	M011	2	0	GO Biological Processes	19	membrane docking	19_GO:0009987 cellular process	-5.59792	4.97685	6.49508	28133	181	406	13	3.20197	0.873733	1778|5577|6616|6804|6812|7430|8541|10383|11258|22919|65009|112755|203068	DYNC1H1|PRKAR2B|SNAP25|STX1A|STXBP1|EZR|PPFIA3|TUBB4B|DCTN3|MAPRE1|NDRG4|STX1B|TUBB	-3.89126	0	33	0	0	-7.8535	5.93941
0	1	1	0	-3.36002	-2.67991	GO:0140056	M011	2	0	GO Biological Processes	19	organelle localization by membrane tethering	19_GO:0051179 localization	-5.08374	4.8344	6.10376	28133	172	406	12	2.95567	0.840523	1778|5577|6616|6804|6812|8541|10383|11258|22919|65009|112755|203068	DYNC1H1|PRKAR2B|SNAP25|STX1A|STXBP1|PPFIA3|TUBB4B|DCTN3|MAPRE1|NDRG4|STX1B|TUBB	-3.44592	0	33	0	0	-7.8535	5.93941
0	0	1	0	0	-2.23486	R-HSA-380320	M001	1	0	Reactome Gene Sets	6	Recruitment of NuMA to mitotic centrosomes		-4.17868	5.89729	5.75506	28133	94	406	8	1.97044	0.689759	1778|5577|10383|11258|22919|84617|84790|203068	DYNC1H1|PRKAR2B|TUBB4B|DCTN3|MAPRE1|TUBB6|TUBA1C|TUBB	-2.66611	0	33	0	0	-7.8535	5.93941
0	1	0	0	-2.1411	0	R-HSA-380259	M010	1	0	Reactome Gene Sets	6	Loss of Nlp from mitotic centrosomes		-3.28067	5.93941	5.0069	28133	70	406	6	1.47783	0.598848	1778|5577|10383|11258|22919|203068	DYNC1H1|PRKAR2B|TUBB4B|DCTN3|MAPRE1|TUBB	-1.90854	0	33	0	0	-7.8535	5.93941
0	1	0	0	-2.1411	0	R-HSA-380284	M010	1	0	Reactome Gene Sets	6	Loss of proteins required for interphase microtubule organization from the centrosome		-3.28067	5.93941	5.0069	28133	70	406	6	1.47783	0.598848	1778|5577|10383|11258|22919|203068	DYNC1H1|PRKAR2B|TUBB4B|DCTN3|MAPRE1|TUBB	-1.90854	0	33	0	0	-7.8535	5.93941
0	1	0	0	-2.09094	0	R-HSA-8854518	M010	1	0	Reactome Gene Sets	6	AURKA Activation by TPX2		-3.18301	5.69532	4.86066	28133	73	406	6	1.47783	0.598848	1778|5577|10383|11258|22919|203068	DYNC1H1|PRKAR2B|TUBB4B|DCTN3|MAPRE1|TUBB	-1.82757	0	33	0	0	-7.8535	5.93941
0	1	0	0	-2.22126	0	R-HSA-68877	M010	1	0	Reactome Gene Sets	6	Mitotic Prometaphase		-3.09143	3.39672	4.15735	28133	204	406	10	2.46305	0.769234	1778|1780|5577|10383|11258|22919|23122|84617|84790|203068	DYNC1H1|DYNC1I1|PRKAR2B|TUBB4B|DCTN3|MAPRE1|CLASP2|TUBB6|TUBA1C|TUBB	-1.74872	0	33	0	0	-7.8535	5.93941
0	1	0	0	-2.60674	0	GO:0060271	M010	1	0	GO Biological Processes	19	cilium assembly	19_GO:0071840 cellular component organization or biogenesis	-2.60674	3.43242	3.75168	28133	415	158	8	5.06329	1.74423	2934|3983|5577|10096|10383|11258|30845|51382	GSN|ABLIM1|PRKAR2B|ACTR3|TUBB4B|DCTN3|EHD3|ATP6V1D	-1.54362	0	33	0	0	-7.8535	5.93941
0	1	0	0	-2.47642	0	GO:0044782	M010	1	0	GO Biological Processes	19	cilium organization	19_GO:0071840 cellular component organization or biogenesis	-2.47642	3.2671	3.58543	28133	436	158	8	5.06329	1.74423	2934|3983|5577|10096|10383|11258|30845|51382	GSN|ABLIM1|PRKAR2B|ACTR3|TUBB4B|DCTN3|EHD3|ATP6V1D	-1.44405	0	33	0	0	-7.8535	5.93941
1	1	1	-4.81628	-5.5837	-5.06401	R-HSA-195258	M111	3	0	Reactome Gene Sets	6	RHO GTPase Effectors		-7.81704	4.45002	7.59342	28133	327	406	21	5.17241	1.09913	805|1778|1780|3020|4629|4637|5217|5300|5879|6714|8359|8826|10095|10096|10383|10787|22919|23122|79784|84617|84790	CALM2|DYNC1H1|DYNC1I1|H3-3A|MYH11|MYL6|PFN2|PIN1|RAC1|SRC|H4C1|IQGAP1|ARPC1B|ACTR3|TUBB4B|NCKAP1|MAPRE1|CLASP2|MYH14|TUBB6|TUBA1C	-5.71821	0	34	1	1	-7.81704	7.2516
1	1	1	-5.14169	-4.86081	-4.19157	R-HSA-194315	M111	3	0	Reactome Gene Sets	6	Signaling by Rho GTPases		-7.01247	3.56874	6.7662	28133	466	406	24	5.91133	1.17044	805|1778|1780|3020|4629|4637|5217|5300|5879|6714|7204|8359|8452|8826|10095|10096|10226|10383|10787|22919|23122|79784|84617|84790	CALM2|DYNC1H1|DYNC1I1|H3-3A|MYH11|MYL6|PFN2|PIN1|RAC1|SRC|TRIO|H4C1|CUL3|IQGAP1|ARPC1B|ACTR3|PLIN3|TUBB4B|NCKAP1|MAPRE1|CLASP2|MYH14|TUBB6|TUBA1C	-5.08008	0	34	0	0	-7.81704	7.2516
0	1	1	0	-5.03347	-3.28953	ko05132	M011	2	0	KEGG Pathway	24	Salmonella infection		-5.36767	7.2516	7.02602	28133	86	406	9	2.21675	0.73068	1778|1780|2317|2318|5217|5879|7082|10095|79784	DYNC1H1|DYNC1I1|FLNB|FLNC|PFN2|RAC1|TJP1|ARPC1B|MYH14	-3.69718	0	34	0	0	-7.81704	7.2516
0	1	1	0	-4.78468	-3.09241	hsa05132	M011	2	0	KEGG Pathway	24	Salmonella infection		-5.00979	6.56461	6.57408	28133	95	406	9	2.21675	0.73068	1778|1780|2317|2318|5217|5879|7082|10095|79784	DYNC1H1|DYNC1I1|FLNB|FLNC|PFN2|RAC1|TJP1|ARPC1B|MYH14	-3.38408	0	34	0	0	-7.81704	7.2516
1	1	1	-2.63224	-4.23157	-4.63099	GO:1901214	M111	3	0	GO Biological Processes	19	regulation of neuron death	19_GO:0050789 regulation of biological process	-7.647	4.55876	7.54915	28133	304	406	20	4.92611	1.07404	348|408|1020|2185|4035|4137|4345|5300|5582|5700|6623|6647|6733|6812|7314|8883|10763|23321|55737|80331	APOE|ARRB1|CDK5|PTK2B|LRP1|MAPT|CD200|PIN1|PRKCG|PSMC1|SNCG|SOD1|SRPK2|STXBP1|UBB|NAE1|NES|TRIM2|VPS35|DNAJC5	-5.57812	0	35	1	1	-7.647	5.13282
1	1	1	-2.3691	-3.82474	-4.84435	GO:0070997	M111	3	0	GO Biological Processes	19	neuron death	19_GO:0009987 cellular process	-7.43762	4.2301	7.29409	28133	344	406	21	5.17241	1.09913	348|408|637|1020|2185|4035|4137|4345|5300|5582|5700|6623|6647|6733|6812|7314|8883|10763|23321|55737|80331	APOE|ARRB1|BID|CDK5|PTK2B|LRP1|MAPT|CD200|PIN1|PRKCG|PSMC1|SNCG|SOD1|SRPK2|STXBP1|UBB|NAE1|NES|TRIM2|VPS35|DNAJC5	-5.42506	0	35	0	0	-7.647	5.13282
1	1	1	-3.60923	-4.78348	-2.38895	GO:0043523	M111	3	0	GO Biological Processes	19	regulation of neuron apoptotic process	19_GO:0050789 regulation of biological process	-5.92778	4.92438	6.68859	28133	197	406	14	3.44828	0.905562	348|408|1020|2185|4035|5300|5582|6647|6733|6812|8883|10763|23321|80331	APOE|ARRB1|CDK5|PTK2B|LRP1|PIN1|PRKCG|SOD1|SRPK2|STXBP1|NAE1|NES|TRIM2|DNAJC5	-4.16548	0	35	0	0	-7.647	5.13282
0	1	1	0	-4.78348	-3.8531	GO:1901215	M011	2	0	GO Biological Processes	19	negative regulation of neuron death	19_GO:0048519 negative regulation of biological process	-5.92778	4.92438	6.68859	28133	197	406	14	3.44828	0.905562	348|408|1020|2185|4035|4345|5300|5582|5700|6647|6812|10763|55737|80331	APOE|ARRB1|CDK5|PTK2B|LRP1|CD200|PIN1|PRKCG|PSMC1|SOD1|STXBP1|NES|VPS35|DNAJC5	-4.16548	0	35	0	0	-7.647	5.13282
1	1	1	-3.25192	-4.30395	-2.70472	GO:0051402	M111	3	0	GO Biological Processes	19	neuron apoptotic process	19_GO:0009987 cellular process	-5.83759	4.51912	6.48461	28133	230	406	15	3.69458	0.936149	348|408|637|1020|2185|4035|5300|5582|6647|6733|6812|8883|10763|23321|80331	APOE|ARRB1|BID|CDK5|PTK2B|LRP1|PIN1|PRKCG|SOD1|SRPK2|STXBP1|NAE1|NES|TRIM2|DNAJC5	-4.08291	0	35	0	0	-7.647	5.13282
1	1	1	-2.51564	-3.92803	-3.22128	GO:0043524	M111	3	0	GO Biological Processes	19	negative regulation of neuron apoptotic process	19_GO:0048519 negative regulation of biological process	-4.55514	5.13282	5.82455	28133	135	406	10	2.46305	0.769234	348|408|2185|4035|5300|5582|6647|6812|10763|80331	APOE|ARRB1|PTK2B|LRP1|PIN1|PRKCG|SOD1|STXBP1|NES|DNAJC5	-2.98862	0	35	0	0	-7.647	5.13282
0	1	1	0	-7.62681	-2.31569	GO:0035637	M011	2	0	GO Biological Processes	19	multicellular organismal signaling	19_GO:0023052 signaling	-7.62681	9.60111	9.26586	28133	204	158	11	6.96203	2.02474	478|493|781|805|3728|4842|6543|6647|23114|30845|79784	ATP1A3|ATP2B4|CACNA2D1|CALM2|JUP|NOS1|SLC8A2|SOD1|NFASC|EHD3|MYH14	-5.25468	0	36	1	1	-7.62681	59.3523
1	1	1	-3.03273	-7.01329	-3.43717	GO:0006936	M111	3	0	GO Biological Processes	19	muscle contraction	19_GO:0032501 multicellular organismal process	-7.33063	4.1695	7.20971	28133	349	406	21	5.17241	1.09913	88|493|781|805|952|2023|2775|2934|3728|4629|4637|4842|5224|6641|6647|7170|7171|7402|9456|30845|79784	ACTN2|ATP2B4|CACNA2D1|CALM2|CD38|ENO1|GNAO1|GSN|JUP|MYH11|MYL6|NOS1|PGAM2|SNTB1|SOD1|TPM3|TPM4|UTRN|HOMER1|EHD3|MYH14	-5.33346	0	36	0	0	-7.62681	59.3523
1	1	1	-3.08001	-6.60403	-2.63449	GO:0003012	M111	3	0	GO Biological Processes	19	muscle system process	19_GO:0032501 multicellular organismal process	-6.60403	5.58923	7.34198	28133	446	158	14	8.86076	2.26079	493|781|805|2775|2934|3728|4842|5300|6641|6647|7170|7171|30845|79784	ATP2B4|CACNA2D1|CALM2|GNAO1|GSN|JUP|NOS1|PIN1|SNTB1|SOD1|TPM3|TPM4|EHD3|MYH14	-4.45195	0	36	0	0	-7.62681	59.3523
1	1	0	-3.29281	-6.57114	0	GO:0008015	M110	2	0	GO Biological Processes	19	blood circulation	19_GO:0032501 multicellular organismal process	-6.57114	5.13626	7.15478	28133	520	158	15	9.49367	2.332	348|478|493|781|805|2244|2775|2934|3728|4842|6543|6647|7525|30845|51752	APOE|ATP1A3|ATP2B4|CACNA2D1|CALM2|FGB|GNAO1|GSN|JUP|NOS1|SLC8A2|SOD1|YES1|EHD3|ERAP1	-4.42708	0	36	0	0	-7.62681	59.3523
1	1	0	-3.2337	-6.46624	0	GO:0003013	M110	2	0	GO Biological Processes	19	circulatory system process	19_GO:0032501 multicellular organismal process	-6.46624	5.03935	7.05529	28133	530	158	15	9.49367	2.332	348|478|493|781|805|2244|2775|2934|3728|4842|6543|6647|7525|30845|51752	APOE|ATP1A3|ATP2B4|CACNA2D1|CALM2|FGB|GNAO1|GSN|JUP|NOS1|SLC8A2|SOD1|YES1|EHD3|ERAP1	-4.34538	0	36	0	0	-7.62681	59.3523
0	1	0	0	-6.34902	0	GO:1901019	M010	1	0	GO Biological Processes	19	regulation of calcium ion transmembrane transporter activity	19_GO:0051179 localization	-6.34902	15.0169	9.61096	28133	83	158	7	4.43038	1.63701	781|805|1020|2631|4842|10681|30845	CACNA2D1|CALM2|CDK5|NIPSNAP2|NOS1|GNB5|EHD3	-4.25019	0	36	0	0	-7.62681	59.3523
0	1	0	0	-6.3394	0	GO:1901387	M010	1	0	GO Biological Processes	19	positive regulation of voltage-gated calcium channel activity	19_GO:0048518 positive regulation of biological process	-6.3394	59.3523	15.1942	28133	12	158	4	2.53165	1.2497	781|1020|2631|30845	CACNA2D1|CDK5|NIPSNAP2|EHD3	-4.24294	0	36	0	0	-7.62681	59.3523
1	1	0	-2.10956	-6.2858	0	GO:0060047	M110	2	0	GO Biological Processes	19	heart contraction	19_GO:0032501 multicellular organismal process	-6.2858	7.07085	7.63087	28133	277	158	11	6.96203	2.02474	478|493|781|805|2775|2934|3728|4842|6543|6647|30845	ATP1A3|ATP2B4|CACNA2D1|CALM2|GNAO1|GSN|JUP|NOS1|SLC8A2|SOD1|EHD3	-4.19873	0	36	0	0	-7.62681	59.3523
1	1	0	-2.04698	-6.13413	0	GO:0003015	M110	2	0	GO Biological Processes	19	heart process	19_GO:0032501 multicellular organismal process	-6.13413	6.82448	7.45351	28133	287	158	11	6.96203	2.02474	478|493|781|805|2775|2934|3728|4842|6543|6647|30845	ATP1A3|ATP2B4|CACNA2D1|CALM2|GNAO1|GSN|JUP|NOS1|SLC8A2|SOD1|EHD3	-4.07842	0	36	0	0	-7.62681	59.3523
1	1	1	-2.60774	-6.03508	-2.34872	GO:0030003	M111	3	0	GO Biological Processes	19	cellular cation homeostasis	19_GO:0065007 biological regulation	-6.03508	4.3628	6.53422	28133	653	158	16	10.1266	2.40004	348|478|493|781|805|1020|4035|4842|6543|6647|7178|8943|9900|10134|51382|51606	APOE|ATP1A3|ATP2B4|CACNA2D1|CALM2|CDK5|LRP1|NOS1|SLC8A2|SOD1|TPT1|AP3D1|SV2A|BCAP31|ATP6V1D|ATP6V1H	-4.00251	0	36	0	0	-7.62681	59.3523
1	1	1	-2.55083	-5.92365	-2.28213	GO:0006873	M111	3	0	GO Biological Processes	19	cellular ion homeostasis	19_GO:0065007 biological regulation	-5.92365	4.27764	6.43335	28133	666	158	16	10.1266	2.40004	348|478|493|781|805|1020|4035|4842|6543|6647|7178|8943|9900|10134|51382|51606	APOE|ATP1A3|ATP2B4|CACNA2D1|CALM2|CDK5|LRP1|NOS1|SLC8A2|SOD1|TPT1|AP3D1|SV2A|BCAP31|ATP6V1D|ATP6V1H	-3.9321	0	36	0	0	-7.62681	59.3523
0	1	0	0	-5.89309	0	GO:1901385	M010	1	0	GO Biological Processes	19	regulation of voltage-gated calcium channel activity	19_GO:0051179 localization	-5.89309	26.1848	11.0427	28133	34	158	5	3.16456	1.39266	781|1020|2631|10681|30845	CACNA2D1|CDK5|NIPSNAP2|GNB5|EHD3	-3.90709	0	36	0	0	-7.62681	59.3523
0	1	0	0	-5.70405	0	GO:1901021	M010	1	0	GO Biological Processes	19	positive regulation of calcium ion transmembrane transporter activity	19_GO:0048518 positive regulation of biological process	-5.70405	24.0618	10.5491	28133	37	158	5	3.16456	1.39266	781|805|1020|2631|30845	CACNA2D1|CALM2|CDK5|NIPSNAP2|EHD3	-3.76089	0	36	0	0	-7.62681	59.3523
1	1	1	-2.65129	-2.20372	-4.51555	hsa04020	M111	3	0	KEGG Pathway	24	Calcium signaling pathway		-5.69784	4.70924	6.46574	28133	206	406	14	3.44828	0.905562	291|293|493|805|952|2185|4842|5333|5533|5582|6543|57118|113026|114787	SLC25A4|SLC25A6|ATP2B4|CALM2|CD38|PTK2B|NOS1|PLCD1|PPP3CC|PRKCG|SLC8A2|CAMK1D|PLCD3|GPRIN1	-3.9704	0	36	0	0	-7.62681	59.3523
0	1	0	0	-5.65393	0	GO:0061337	M010	1	0	GO Biological Processes	19	cardiac conduction	19_GO:0023052 signaling	-5.65393	9.49637	7.84108	28133	150	158	8	5.06329	1.74423	478|493|781|805|3728|4842|6543|30845	ATP1A3|ATP2B4|CACNA2D1|CALM2|JUP|NOS1|SLC8A2|EHD3	-3.7199	0	36	0	0	-7.62681	59.3523
1	1	0	-2.38174	-5.44859	0	GO:1903779	M110	2	0	GO Biological Processes	19	regulation of cardiac conduction	19_GO:0023052 signaling	-5.44859	14.6348	8.76619	28133	73	158	6	3.79747	1.52059	478|493|805|4842|6543|30845	ATP1A3|ATP2B4|CALM2|NOS1|SLC8A2|EHD3	-3.57683	0	36	0	0	-7.62681	59.3523
1	1	0	-2.64033	-5.43059	0	GO:0006816	M110	2	0	GO Biological Processes	19	calcium ion transport	19_GO:0051179 localization	-5.43059	5.22417	6.46723	28133	409	158	12	7.59494	2.10757	493|781|805|1020|2631|2775|4842|6543|7178|10681|11331|30845	ATP2B4|CACNA2D1|CALM2|CDK5|NIPSNAP2|GNAO1|NOS1|SLC8A2|TPT1|GNB5|PHB2|EHD3	-3.56239	0	36	0	0	-7.62681	59.3523
1	1	1	-2.29913	-5.42783	-2.39842	GO:0055080	M111	3	0	GO Biological Processes	19	cation homeostasis	19_GO:0065007 biological regulation	-5.42783	3.91334	5.9853	28133	728	158	16	10.1266	2.40004	348|478|493|781|805|1020|4035|4842|6543|6647|7178|8943|9900|10134|51382|51606	APOE|ATP1A3|ATP2B4|CACNA2D1|CALM2|CDK5|LRP1|NOS1|SLC8A2|SOD1|TPT1|AP3D1|SV2A|BCAP31|ATP6V1D|ATP6V1H	-3.56169	0	36	0	0	-7.62681	59.3523
1	1	1	-2.26133	-5.35293	-2.34935	GO:0098771	M111	3	0	GO Biological Processes	19	inorganic ion homeostasis	19_GO:0065007 biological regulation	-5.35293	3.86031	5.91766	28133	738	158	16	10.1266	2.40004	348|478|493|781|805|1020|4035|4842|6543|6647|7178|8943|9900|10134|51382|51606	APOE|ATP1A3|ATP2B4|CACNA2D1|CALM2|CDK5|LRP1|NOS1|SLC8A2|SOD1|TPT1|AP3D1|SV2A|BCAP31|ATP6V1D|ATP6V1H	-3.50505	0	36	0	0	-7.62681	59.3523
1	1	1	-2.40353	-5.32587	-2.33222	GO:0006875	M111	3	0	GO Biological Processes	19	cellular metal ion homeostasis	19_GO:0065007 biological regulation	-5.32587	4.35043	6.08951	28133	573	158	14	8.86076	2.26079	348|478|493|781|805|1020|4035|4842|6543|6647|7178|8943|9900|10134	APOE|ATP1A3|ATP2B4|CACNA2D1|CALM2|CDK5|LRP1|NOS1|SLC8A2|SOD1|TPT1|AP3D1|SV2A|BCAP31	-3.48548	0	36	0	0	-7.62681	59.3523
1	1	0	-2.71215	-5.17819	0	GO:1903522	M110	2	0	GO Biological Processes	19	regulation of blood circulation	19_GO:0032501 multicellular organismal process	-5.17819	6.07703	6.56527	28133	293	158	10	6.32911	1.93707	478|493|781|805|2244|2775|3728|4842|6543|30845	ATP1A3|ATP2B4|CACNA2D1|CALM2|FGB|GNAO1|JUP|NOS1|SLC8A2|EHD3	-3.38748	0	36	0	0	-7.62681	59.3523
0	1	0	0	-5.08859	0	GO:0070588	M010	1	0	GO Biological Processes	19	calcium ion transmembrane transport	19_GO:0051179 localization	-5.08859	5.93523	6.4585	28133	300	158	10	6.32911	1.93707	493|781|805|1020|2631|4842|6543|10681|11331|30845	ATP2B4|CACNA2D1|CALM2|CDK5|NIPSNAP2|NOS1|SLC8A2|GNB5|PHB2|EHD3	-3.31851	0	36	0	0	-7.62681	59.3523
0	1	0	0	-4.95172	0	GO:0008016	M010	1	0	GO Biological Processes	19	regulation of heart contraction	19_GO:0032501 multicellular organismal process	-4.95172	6.51428	6.52829	28133	246	158	9	5.6962	1.84386	478|493|781|805|2775|3728|4842|6543|30845	ATP1A3|ATP2B4|CACNA2D1|CALM2|GNAO1|JUP|NOS1|SLC8A2|EHD3	-3.22324	0	36	0	0	-7.62681	59.3523
1	1	0	-2.3703	-4.93547	0	GO:0070838	M110	2	0	GO Biological Processes	19	divalent metal ion transport	19_GO:0051179 localization	-4.93547	4.66525	5.94342	28133	458	158	12	7.59494	2.10757	493|781|805|1020|2631|2775|4842|6543|7178|10681|11331|30845	ATP2B4|CACNA2D1|CALM2|CDK5|NIPSNAP2|GNAO1|NOS1|SLC8A2|TPT1|GNB5|PHB2|EHD3	-3.21003	0	36	0	0	-7.62681	59.3523
1	1	0	-2.34991	-4.89794	0	GO:0072511	M110	2	0	GO Biological Processes	19	divalent inorganic cation transport	19_GO:0051179 localization	-4.89794	4.62486	5.90396	28133	462	158	12	7.59494	2.10757	493|781|805|1020|2631|2775|4842|6543|7178|10681|11331|30845	ATP2B4|CACNA2D1|CALM2|CDK5|NIPSNAP2|GNAO1|NOS1|SLC8A2|TPT1|GNB5|PHB2|EHD3	-3.18249	0	36	0	0	-7.62681	59.3523
1	0	1	-2.06009	0	-4.09139	ko04020	M101	2	0	KEGG Pathway	24	Calcium signaling pathway		-4.83565	4.56878	5.84478	28133	182	406	12	2.95567	0.840523	291|293|493|805|952|2185|4842|5333|5533|5582|6543|113026	SLC25A4|SLC25A6|ATP2B4|CALM2|CD38|PTK2B|NOS1|PLCD1|PPP3CC|PRKCG|SLC8A2|PLCD3	-3.22725	0	36	0	0	-7.62681	59.3523
1	1	0	-2.70913	-4.79872	0	R-HSA-5578775	M110	2	0	Reactome Gene Sets	6	Ion homeostasis		-4.79872	15.8979	8.38665	28133	56	158	5	3.16456	1.39266	478|493|805|4842|6543	ATP1A3|ATP2B4|CALM2|NOS1|SLC8A2	-3.11006	0	36	0	0	-7.62681	59.3523
0	1	0	0	-4.74959	0	GO:1903169	M010	1	0	GO Biological Processes	19	regulation of calcium ion transmembrane transport	19_GO:0051179 localization	-4.74959	8.65555	6.92162	28133	144	158	7	4.43038	1.63701	781|805|1020|2631|4842|10681|30845	CACNA2D1|CALM2|CDK5|NIPSNAP2|NOS1|GNB5|EHD3	-3.08014	0	36	0	0	-7.62681	59.3523
1	1	1	-2.10298	-4.74884	-2.39073	GO:0055065	M111	3	0	GO Biological Processes	19	metal ion homeostasis	19_GO:0065007 biological regulation	-4.74884	3.8648	5.53155	28133	645	158	14	8.86076	2.26079	348|478|493|781|805|1020|4035|4842|6543|6647|7178|8943|9900|10134	APOE|ATP1A3|ATP2B4|CACNA2D1|CALM2|CDK5|LRP1|NOS1|SLC8A2|SOD1|TPT1|AP3D1|SV2A|BCAP31	-3.08014	0	36	0	0	-7.62681	59.3523
1	1	1	-2.25616	-4.72503	-2.40194	GO:0072503	M111	3	0	GO Biological Processes	19	cellular divalent inorganic cation homeostasis	19_GO:0065007 biological regulation	-4.72503	4.44217	5.72249	28133	481	158	12	7.59494	2.10757	348|493|781|805|1020|4035|4842|6543|7178|8943|9900|10134	APOE|ATP2B4|CACNA2D1|CALM2|CDK5|LRP1|NOS1|SLC8A2|TPT1|AP3D1|SV2A|BCAP31	-3.0651	0	36	0	0	-7.62681	59.3523
1	1	1	-2.16719	-4.56045	-2.28567	GO:0072507	M111	3	0	GO Biological Processes	19	divalent inorganic cation homeostasis	19_GO:0065007 biological regulation	-4.56045	4.27337	5.55021	28133	500	158	12	7.59494	2.10757	348|493|781|805|1020|4035|4842|6543|7178|8943|9900|10134	APOE|ATP2B4|CACNA2D1|CALM2|CDK5|LRP1|NOS1|SLC8A2|TPT1|AP3D1|SV2A|BCAP31	-2.95513	0	36	0	0	-7.62681	59.3523
1	1	0	-4.53224	-4.21858	0	R-HSA-418359	M110	2	0	Reactome Gene Sets	6	Reduction of cytosolic Ca++ levels		-4.53224	48.6169	11.8574	28133	14	124	3	2.41935	1.37981	493|805|6543	ATP2B4|CALM2|SLC8A2	-2.94052	0	36	0	0	-7.62681	59.3523
0	1	1	0	-3.86277	-2.90486	GO:1904062	M011	2	0	GO Biological Processes	19	regulation of cation transmembrane transport	19_GO:0051179 localization	-4.39464	3.26085	5.07523	28133	340	406	16	3.94089	0.965613	88|493|781|805|1020|1804|2185|2631|4842|7070|7402|9456|10681|11331|30845|53826	ACTN2|ATP2B4|CACNA2D1|CALM2|CDK5|DPP6|PTK2B|NIPSNAP2|NOS1|THY1|UTRN|HOMER1|GNB5|PHB2|EHD3|FXYD6	-2.84865	0	36	0	0	-7.62681	59.3523
0	1	0	0	-4.35555	0	GO:2001259	M010	1	0	GO Biological Processes	19	positive regulation of cation channel activity	19_GO:0048518 positive regulation of biological process	-4.35555	12.9027	7.43941	28133	69	158	5	3.16456	1.39266	781|805|1020|2631|30845	CACNA2D1|CALM2|CDK5|NIPSNAP2|EHD3	-2.81823	0	36	0	0	-7.62681	59.3523
0	1	0	0	-4.3552	0	GO:0006874	M010	1	0	GO Biological Processes	19	cellular calcium ion homeostasis	19_GO:0065007 biological regulation	-4.3552	4.42128	5.45472	28133	443	158	11	6.96203	2.02474	348|493|781|805|1020|4035|4842|6543|7178|9900|10134	APOE|ATP2B4|CACNA2D1|CALM2|CDK5|LRP1|NOS1|SLC8A2|TPT1|SV2A|BCAP31	-2.81823	0	36	0	0	-7.62681	59.3523
0	1	0	0	-4.32533	0	GO:1904427	M010	1	0	GO Biological Processes	19	positive regulation of calcium ion transmembrane transport	19_GO:0048518 positive regulation of biological process	-4.32533	12.7184	7.37721	28133	70	158	5	3.16456	1.39266	781|805|1020|2631|30845	CACNA2D1|CALM2|CDK5|NIPSNAP2|EHD3	-2.7982	0	36	0	0	-7.62681	59.3523
0	1	0	0	-4.25103	0	GO:0055074	M010	1	0	GO Biological Processes	19	calcium ion homeostasis	19_GO:0065007 biological regulation	-4.25103	4.30467	5.34085	28133	455	158	11	6.96203	2.02474	348|493|781|805|1020|4035|4842|6543|7178|9900|10134	APOE|ATP2B4|CACNA2D1|CALM2|CDK5|LRP1|NOS1|SLC8A2|TPT1|SV2A|BCAP31	-2.74643	0	36	0	0	-7.62681	59.3523
0	1	0	0	-4.23975	0	GO:0006941	M010	1	0	GO Biological Processes	19	striated muscle contraction	19_GO:0032501 multicellular organismal process	-4.23975	7.20462	6.15196	28133	173	158	7	4.43038	1.63701	781|805|2934|3728|4842|30845|79784	CACNA2D1|CALM2|GSN|JUP|NOS1|EHD3|MYH14	-2.73697	0	36	0	0	-7.62681	59.3523
0	1	0	0	-4.22394	0	GO:2001257	M010	1	0	GO Biological Processes	19	regulation of cation channel activity	19_GO:0051179 localization	-4.22394	7.16321	6.12865	28133	174	158	7	4.43038	1.63701	781|805|1020|2631|4842|10681|30845	CACNA2D1|CALM2|CDK5|NIPSNAP2|NOS1|GNB5|EHD3	-2.72896	0	36	0	0	-7.62681	59.3523
0	1	0	0	-4.19973	0	GO:0051924	M010	1	0	GO Biological Processes	19	regulation of calcium ion transport	19_GO:0051179 localization	-4.19973	5.98511	5.80422	28133	238	158	8	5.06329	1.74423	781|805|1020|2631|2775|4842|10681|30845	CACNA2D1|CALM2|CDK5|NIPSNAP2|GNAO1|NOS1|GNB5|EHD3	-2.71005	0	36	0	0	-7.62681	59.3523
0	1	1	0	-3.96791	-2.43722	GO:0032412	M011	2	0	GO Biological Processes	19	regulation of ion transmembrane transporter activity	19_GO:0051179 localization	-3.98787	3.5051	4.88189	28133	257	406	13	3.20197	0.873733	88|781|805|1020|2185|2631|4842|7402|9456|10681|11331|30845|53826	ACTN2|CACNA2D1|CALM2|CDK5|PTK2B|NIPSNAP2|NOS1|UTRN|HOMER1|GNB5|PHB2|EHD3|FXYD6	-2.50576	0	36	0	0	-7.62681	59.3523
0	1	0	0	-3.98173	0	GO:0060048	M010	1	0	GO Biological Processes	19	cardiac muscle contraction	19_GO:0032501 multicellular organismal process	-3.98173	8.0935	6.1391	28133	132	158	6	3.79747	1.52059	781|805|2934|3728|4842|30845	CACNA2D1|CALM2|GSN|JUP|NOS1|EHD3	-2.54813	0	36	0	0	-7.62681	59.3523
1	1	0	-2.73569	-3.88687	0	R-HSA-397014	M110	2	0	Reactome Gene Sets	6	Muscle contraction		-3.88687	6.3269	5.63857	28133	197	158	7	4.43038	1.63701	478|493|805|4842|6543|7170|7171	ATP1A3|ATP2B4|CALM2|NOS1|SLC8A2|TPM3|TPM4	-2.47146	0	36	0	0	-7.62681	59.3523
0	1	1	0	-3.51378	-2.58514	GO:0010959	M011	2	0	GO Biological Processes	19	regulation of metal ion transport	19_GO:0051179 localization	-3.84435	2.9253	4.56633	28133	379	406	16	3.94089	0.965613	88|493|781|805|1020|1804|2185|2631|2775|4842|7070|7402|9456|10681|30845|53826	ACTN2|ATP2B4|CACNA2D1|CALM2|CDK5|DPP6|PTK2B|NIPSNAP2|GNAO1|NOS1|THY1|UTRN|HOMER1|GNB5|EHD3|FXYD6	-2.3869	0	36	0	0	-7.62681	59.3523
0	1	1	0	-3.84282	-2.33848	GO:0022898	M011	2	0	GO Biological Processes	19	regulation of transmembrane transporter activity	19_GO:0051179 localization	-3.84282	5.31513	5.33428	28133	268	158	8	5.06329	1.74423	781|805|1020|2631|4842|10681|11331|30845	CACNA2D1|CALM2|CDK5|NIPSNAP2|NOS1|GNB5|PHB2|EHD3	-2.44081	0	36	0	0	-7.62681	59.3523
0	1	0	0	-3.7914	0	GO:0043269	M010	1	0	GO Biological Processes	19	regulation of ion transport	19_GO:0051179 localization	-3.7914	3.32578	4.66926	28133	696	158	13	8.22785	2.1861	348|493|781|805|1020|2631|2775|4842|6812|9900|10681|11331|30845	APOE|ATP2B4|CACNA2D1|CALM2|CDK5|NIPSNAP2|GNAO1|NOS1|STXBP1|SV2A|GNB5|PHB2|EHD3	-2.40144	0	36	0	0	-7.62681	59.3523
0	1	0	0	-3.77473	0	GO:1904064	M010	1	0	GO Biological Processes	19	positive regulation of cation transmembrane transport	19_GO:0048518 positive regulation of biological process	-3.77473	7.41904	5.80365	28133	144	158	6	3.79747	1.52059	781|805|1020|2631|4842|30845	CACNA2D1|CALM2|CDK5|NIPSNAP2|NOS1|EHD3	-2.39126	0	36	0	0	-7.62681	59.3523
0	1	0	0	-3.77473	0	ko04261	M010	1	0	KEGG Pathway	24	Adrenergic signaling in cardiomyocytes		-3.77473	7.41904	5.80365	28133	144	158	6	3.79747	1.52059	478|493|781|805|7170|7171	ATP1A3|ATP2B4|CACNA2D1|CALM2|TPM3|TPM4	-2.39126	0	36	0	0	-7.62681	59.3523
0	1	0	0	-3.73353	0	GO:0098703	M010	1	0	GO Biological Processes	19	calcium ion import across plasma membrane	19_GO:0051179 localization	-3.76344	13.8586	6.96094	28133	20	406	4	0.985222	0.490178	493|781|6543|7442	ATP2B4|CACNA2D1|SLC8A2|TRPV1	-2.31887	0	36	0	0	-7.62681	59.3523
0	1	0	0	-3.72604	0	hsa04261	M010	1	0	KEGG Pathway	24	Adrenergic signaling in cardiomyocytes		-3.72604	7.26763	5.72579	28133	147	158	6	3.79747	1.52059	478|493|781|805|7170|7171	ATP1A3|ATP2B4|CACNA2D1|CALM2|TPM3|TPM4	-2.35498	0	36	0	0	-7.62681	59.3523
0	1	0	0	-3.72373	0	GO:0043270	M010	1	0	GO Biological Processes	19	positive regulation of ion transport	19_GO:0048518 positive regulation of biological process	-3.72373	5.10558	5.17936	28133	279	158	8	5.06329	1.74423	348|781|805|1020|2631|4842|6812|30845	APOE|CACNA2D1|CALM2|CDK5|NIPSNAP2|NOS1|STXBP1|EHD3	-2.35338	0	36	0	0	-7.62681	59.3523
0	1	1	0	-3.68182	-2.21215	GO:0032409	M011	2	0	GO Biological Processes	19	regulation of transporter activity	19_GO:0065007 biological regulation	-3.68182	5.03341	5.12504	28133	283	158	8	5.06329	1.74423	781|805|1020|2631|4842|10681|11331|30845	CACNA2D1|CALM2|CDK5|NIPSNAP2|NOS1|GNB5|PHB2|EHD3	-2.32397	0	36	0	0	-7.62681	59.3523
0	1	0	0	-3.66837	0	GO:1902656	M010	1	0	GO Biological Processes	19	calcium ion import into cytosol	19_GO:0051179 localization	-3.67662	13.1987	6.76688	28133	21	406	4	0.985222	0.490178	493|781|6543|7442	ATP2B4|CACNA2D1|SLC8A2|TRPV1	-2.2456	0	36	0	0	-7.62681	59.3523
0	1	0	0	-3.54207	0	GO:0034767	M010	1	0	GO Biological Processes	19	positive regulation of ion transmembrane transport	19_GO:0048518 positive regulation of biological process	-3.54207	6.71913	5.43494	28133	159	158	6	3.79747	1.52059	781|805|1020|2631|4842|30845	CACNA2D1|CALM2|CDK5|NIPSNAP2|NOS1|EHD3	-2.22179	0	36	0	0	-7.62681	59.3523
0	1	0	0	-3.53056	0	GO:0032414	M010	1	0	GO Biological Processes	19	positive regulation of ion transmembrane transporter activity	19_GO:0048518 positive regulation of biological process	-3.53056	8.64354	5.84044	28133	103	158	5	3.16456	1.39266	781|805|1020|2631|30845	CACNA2D1|CALM2|CDK5|NIPSNAP2|EHD3	-2.21502	0	36	0	0	-7.62681	59.3523
1	1	0	-3.50719	-3.19979	0	R-HSA-418360	M110	2	0	Reactome Gene Sets	6	Platelet calcium homeostasis		-3.50719	22.6879	7.90796	28133	30	124	3	2.41935	1.37981	493|805|6543	ATP2B4|CALM2|SLC8A2	-2.19478	0	36	0	0	-7.62681	59.3523
0	1	0	0	-3.49363	0	GO:0086065	M010	1	0	GO Biological Processes	19	cell communication involved in cardiac conduction	19_GO:0023052 signaling	-3.49363	12.2798	6.46248	28133	58	158	4	2.53165	1.2497	478|781|805|3728	ATP1A3|CACNA2D1|CALM2|JUP	-2.18747	0	36	0	0	-7.62681	59.3523
0	1	1	0	-3.41655	-2.006	GO:0007204	M011	2	0	GO Biological Processes	19	positive regulation of cytosolic calcium ion concentration	19_GO:0065007 biological regulation	-3.41655	4.59502	4.78326	28133	310	158	8	5.06329	1.74423	493|781|805|1020|4035|4842|6543|10134	ATP2B4|CACNA2D1|CALM2|CDK5|LRP1|NOS1|SLC8A2|BCAP31	-2.13335	0	36	0	0	-7.62681	59.3523
1	1	1	-2.07726	-2.70488	-2.23486	GO:0050848	M111	3	0	GO Biological Processes	19	regulation of calcium-mediated signaling	19_GO:0023052 signaling	-3.36519	5.16012	4.88878	28133	94	406	7	1.72414	0.646021	493|805|1012|2185|4137|4842|6543	ATP2B4|CALM2|CDH13|PTK2B|MAPT|NOS1|SLC8A2	-1.98034	0	36	0	0	-7.62681	59.3523
0	1	0	0	-3.36273	0	GO:0032411	M010	1	0	GO Biological Processes	19	positive regulation of transporter activity	19_GO:0048518 positive regulation of biological process	-3.36273	7.94897	5.53773	28133	112	158	5	3.16456	1.39266	781|805|1020|2631|30845	CACNA2D1|CALM2|CDK5|NIPSNAP2|EHD3	-2.09232	0	36	0	0	-7.62681	59.3523
0	1	0	0	-3.29081	0	GO:0090257	M010	1	0	GO Biological Processes	19	regulation of muscle system process	19_GO:0032501 multicellular organismal process	-3.29081	5.04615	4.8	28133	247	158	7	4.43038	1.63701	493|805|3728|4842|5300|6647|30845	ATP2B4|CALM2|JUP|NOS1|PIN1|SOD1|EHD3	-2.03979	0	36	0	0	-7.62681	59.3523
0	1	0	0	-3.25909	0	GO:0051928	M010	1	0	GO Biological Processes	19	positive regulation of calcium ion transport	19_GO:0048518 positive regulation of biological process	-3.25909	7.54479	5.35408	28133	118	158	5	3.16456	1.39266	781|805|1020|2631|30845	CACNA2D1|CALM2|CDK5|NIPSNAP2|EHD3	-2.01613	0	36	0	0	-7.62681	59.3523
0	1	1	0	-2.63465	-2.08023	ko04022	M011	2	0	KEGG Pathway	24	cGMP-PKG signaling pathway		-3.19986	3.826	4.37856	28133	163	406	9	2.21675	0.73068	291|293|478|493|805|5138|5533|5605|6543	SLC25A4|SLC25A6|ATP1A3|ATP2B4|CALM2|PDE2A|PPP3CC|MAP2K2|SLC8A2	-1.84096	0	36	0	0	-7.62681	59.3523
0	1	1	0	-3.00963	-2.43517	GO:0097553	M011	2	0	GO Biological Processes	19	calcium ion transmembrane import into cytosol	19_GO:0051179 localization	-3.12287	4.1369	4.40447	28133	134	406	8	1.97044	0.689759	493|781|805|2185|4842|6543|7070|7442	ATP2B4|CACNA2D1|CALM2|PTK2B|NOS1|SLC8A2|THY1|TRPV1	-1.77511	0	36	0	0	-7.62681	59.3523
0	1	0	0	-3.11223	0	GO:0051480	M010	1	0	GO Biological Processes	19	regulation of cytosolic calcium ion concentration	19_GO:0065007 biological regulation	-3.11223	4.12886	4.39451	28133	345	158	8	5.06329	1.74423	493|781|805|1020|4035|4842|6543|10134	ATP2B4|CACNA2D1|CALM2|CDK5|LRP1|NOS1|SLC8A2|BCAP31	-1.91168	0	36	0	0	-7.62681	59.3523
0	0	1	0	0	-2.64856	GO:0019932	M001	1	0	GO Biological Processes	19	second-messenger-mediated signaling	19_GO:0023052 signaling	-3.09038	2.49705	3.84756	28133	444	406	16	3.94089	0.965613	348|358|493|805|1012|2039|2185|4137|4724|4842|5138|5533|5577|6543|9693|10134	APOE|AQP1|ATP2B4|CALM2|CDH13|DMTN|PTK2B|MAPT|NDUFS4|NOS1|PDE2A|PPP3CC|PRKAR2B|SLC8A2|RAPGEF2|BCAP31	-1.74809	0	36	0	0	-7.62681	59.3523
0	1	0	0	-3.08376	0	R-HSA-5576891	M010	1	0	Reactome Gene Sets	6	Cardiac conduction		-3.08376	6.90143	5.04878	28133	129	158	5	3.16456	1.39266	478|493|805|4842|6543	ATP1A3|ATP2B4|CALM2|NOS1|SLC8A2	-1.89306	0	36	0	0	-7.62681	59.3523
0	1	0	0	-2.52316	0	hsa04022	M010	1	0	KEGG Pathway	24	cGMP-PKG signaling pathway		-3.01585	3.60484	4.15861	28133	173	406	9	2.21675	0.73068	291|293|478|493|805|5138|5533|5605|6543	SLC25A4|SLC25A6|ATP1A3|ATP2B4|CALM2|PDE2A|PPP3CC|MAP2K2|SLC8A2	-1.68726	0	36	0	0	-7.62681	59.3523
0	1	0	0	-2.98408	0	GO:0055117	M010	1	0	GO Biological Processes	19	regulation of cardiac muscle contraction	19_GO:0032501 multicellular organismal process	-2.98408	9.01554	5.36158	28133	79	158	4	2.53165	1.2497	805|3728|4842|30845	CALM2|JUP|NOS1|EHD3	-1.81913	0	36	0	0	-7.62681	59.3523
0	1	1	0	-2.15234	-2.23578	GO:0019722	M011	2	0	GO Biological Processes	19	calcium-mediated signaling	19_GO:0023052 signaling	-2.96452	3.26854	4.012	28133	212	406	10	2.46305	0.769234	493|805|1012|2039|2185|4137|4842|5533|6543|10134	ATP2B4|CALM2|CDH13|DMTN|PTK2B|MAPT|NOS1|PPP3CC|SLC8A2|BCAP31	-1.64184	0	36	0	0	-7.62681	59.3523
0	1	0	0	-2.92971	0	GO:0034764	M010	1	0	GO Biological Processes	19	positive regulation of transmembrane transport	19_GO:0048518 positive regulation of biological process	-2.92971	5.13626	4.49973	28133	208	158	6	3.79747	1.52059	781|805|1020|2631|4842|30845	CACNA2D1|CALM2|CDK5|NIPSNAP2|NOS1|EHD3	-1.78037	0	36	0	0	-7.62681	59.3523
0	1	0	0	-2.90417	0	GO:0070509	M010	1	0	GO Biological Processes	19	calcium ion import	19_GO:0051179 localization	-2.90417	8.58106	5.19812	28133	83	158	4	2.53165	1.2497	493|781|1020|6543	ATP2B4|CACNA2D1|CDK5|SLC8A2	-1.76406	0	36	0	0	-7.62681	59.3523
0	1	0	0	-2.79509	0	GO:0034765	M010	1	0	GO Biological Processes	19	regulation of ion transmembrane transport	19_GO:0051179 localization	-2.79509	3.34554	3.89112	28133	479	158	9	5.6962	1.84386	493|781|805|1020|2631|4842|10681|11331|30845	ATP2B4|CACNA2D1|CALM2|CDK5|NIPSNAP2|NOS1|GNB5|PHB2|EHD3	-1.68096	0	36	0	0	-7.62681	59.3523
1	1	0	-2.12903	-2.77417	0	ko04970	M110	2	0	KEGG Pathway	24	Salivary secretion		-2.77417	7.91364	4.93696	28133	90	158	4	2.53165	1.2497	478|493|805|4842	ATP1A3|ATP2B4|CALM2|NOS1	-1.66592	0	36	0	0	-7.62681	59.3523
0	1	1	0	-2.76699	-2.205	GO:0060402	M011	2	0	GO Biological Processes	19	calcium ion transport into cytosol	19_GO:0051179 localization	-2.77072	3.64701	3.95965	28133	152	406	8	1.97044	0.689759	493|781|805|2185|4842|6543|7070|7442	ATP2B4|CACNA2D1|CALM2|PTK2B|NOS1|SLC8A2|THY1|TRPV1	-1.47289	0	36	0	0	-7.62681	59.3523
0	1	0	0	-2.7391	0	GO:0098659	M010	1	0	GO Biological Processes	19	inorganic cation import across plasma membrane	19_GO:0051179 localization	-2.7391	7.74161	4.86748	28133	92	158	4	2.53165	1.2497	478|493|781|6543	ATP1A3|ATP2B4|CACNA2D1|SLC8A2	-1.64026	0	36	0	0	-7.62681	59.3523
0	1	0	0	-2.7391	0	GO:0099587	M010	1	0	GO Biological Processes	19	inorganic ion import across plasma membrane	19_GO:0051179 localization	-2.7391	7.74161	4.86748	28133	92	158	4	2.53165	1.2497	478|493|781|6543	ATP1A3|ATP2B4|CACNA2D1|SLC8A2	-1.64026	0	36	0	0	-7.62681	59.3523
1	1	0	-2.07726	-2.70488	0	hsa04970	M110	2	0	KEGG Pathway	24	Salivary secretion		-2.70488	7.57689	4.80007	28133	94	158	4	2.53165	1.2497	478|493|805|4842	ATP1A3|ATP2B4|CALM2|NOS1	-1.61463	0	36	0	0	-7.62681	59.3523
0	1	0	0	-2.68807	0	GO:0006942	M010	1	0	GO Biological Processes	19	regulation of striated muscle contraction	19_GO:0032501 multicellular organismal process	-2.68807	7.49714	4.7671	28133	95	158	4	2.53165	1.2497	805|3728|4842|30845	CALM2|JUP|NOS1|EHD3	-1.60217	0	36	0	0	-7.62681	59.3523
0	1	0	0	-2.61171	0	GO:0006937	M010	1	0	GO Biological Processes	19	regulation of muscle contraction	19_GO:0032501 multicellular organismal process	-2.61171	5.39567	4.25579	28133	165	158	5	3.16456	1.39266	805|3728|4842|6647|30845	CALM2|JUP|NOS1|SOD1|EHD3	-1.54643	0	36	0	0	-7.62681	59.3523
0	1	1	0	-2.57792	-2.02693	GO:0060401	M011	2	0	GO Biological Processes	19	cytosolic calcium ion transport	19_GO:0051179 localization	-2.57792	5.29931	4.2004	28133	168	158	5	3.16456	1.39266	493|781|805|4842|6543	ATP2B4|CACNA2D1|CALM2|NOS1|SLC8A2	-1.52243	0	36	0	0	-7.62681	59.3523
0	1	0	0	-2.57578	0	hsa04925	M010	1	0	KEGG Pathway	24	aldosterone synthesis and secretion		-2.57578	6.98263	4.54901	28133	102	158	4	2.53165	1.2497	478|493|805|57118	ATP1A3|ATP2B4|CALM2|CAMK1D	-1.52115	0	36	0	0	-7.62681	59.3523
0	1	0	0	-2.41182	0	R-HSA-936837	M010	1	0	Reactome Gene Sets	6	Ion transport by P-type ATPases		-2.41182	9.53877	4.80682	28133	56	158	3	1.89873	1.08578	478|493|805	ATP1A3|ATP2B4|CALM2	-1.39177	0	36	0	0	-7.62681	59.3523
0	1	0	0	-2.32055	0	GO:0034762	M010	1	0	GO Biological Processes	19	regulation of transmembrane transport	19_GO:0051179 localization	-2.32055	2.83631	3.31368	28133	565	158	9	5.6962	1.84386	493|781|805|1020|2631|4842|10681|11331|30845	ATP2B4|CACNA2D1|CALM2|CDK5|NIPSNAP2|NOS1|GNB5|PHB2|EHD3	-1.32393	0	36	0	0	-7.62681	59.3523
0	1	0	0	-2.00697	0	GO:0098739	M010	1	0	GO Biological Processes	19	import across plasma membrane	19_GO:0051179 localization	-2.00697	4.81235	3.49466	28133	148	158	4	2.53165	1.2497	478|493|781|6543	ATP1A3|ATP2B4|CACNA2D1|SLC8A2	-1.08502	0	36	0	0	-7.62681	59.3523
1	1	1	-3.38426	-7.53618	-2.74837	R-HSA-9006934	M111	3	0	Reactome Gene Sets	6	Signaling by Receptor Tyrosine Kinases		-7.53618	5.64141	7.90978	28133	505	158	16	10.1266	2.40004	102|348|805|1020|1175|3178|3187|3728|3925|5605|5879|5898|6285|7525|51382|51606	ADAM10|APOE|CALM2|CDK5|AP2S1|HNRNPA1|HNRNPH1|JUP|STMN1|MAP2K2|RAC1|RALA|S100B|YES1|ATP6V1D|ATP6V1H	-5.19199	0	37	1	1	-7.53618	14.8381
1	1	0	-3.10032	-3.48428	0	WP437	M110	2	0	WikiPathways	27	EGF/EGFR Signaling Pathway		-3.48428	6.55424	5.34461	28133	163	158	6	3.79747	1.52059	1175|3925|5605|5879|5898|6812	AP2S1|STMN1|MAP2K2|RAC1|RALA|STXBP1	-2.18342	0	37	0	0	-7.53618	14.8381
0	1	0	0	-3.00963	0	R-HSA-166520	M010	1	0	Reactome Gene Sets	6	Signaling by NTRKs		-3.00963	6.64392	4.92159	28133	134	158	5	3.16456	1.39266	1020|1175|5605|5879|5898	CDK5|AP2S1|MAP2K2|RAC1|RALA	-1.83627	0	37	0	0	-7.53618	14.8381
0	1	0	0	-2.96533	0	GO:0032801	M010	1	0	GO Biological Processes	19	receptor catabolic process	19_GO:0008152 metabolic process	-2.96533	14.8381	6.24368	28133	36	158	3	1.89873	1.08578	348|1020|1175	APOE|CDK5|AP2S1	-1.80536	0	37	0	0	-7.53618	14.8381
0	1	0	0	-2.38879	0	R-HSA-187037	M010	1	0	Reactome Gene Sets	6	Signaling by NTRK1 (TRKA)		-2.38879	6.19329	4.19388	28133	115	158	4	2.53165	1.2497	1020|1175|5605|5898	CDK5|AP2S1|MAP2K2|RALA	-1.37585	0	37	0	0	-7.53618	14.8381
1	1	0	-4.72211	-4.13193	0	WP411	M110	2	0	WikiPathways	27	mRNA Processing		-7.50308	7.2646	8.45994	28133	124	406	13	3.20197	0.873733	2521|3178|3187|3188|4670|4809|4904|5094|6733|9343|10992|23451|57819	FUS|HNRNPA1|HNRNPH1|HNRNPH2|HNRNPM|SNU13|YBX1|PCBP2|SRPK2|EFTUD2|SF3B2|SF3B1|LSM2	-5.47598	0	38	1	1	-7.50308	7.99536
1	1	0	-2.87631	-4.08624	0	R-HSA-72163	M110	2	0	Reactome Gene Sets	6	mRNA Splicing - Major Pathway		-5.54499	4.92246	6.44177	28133	183	406	13	3.20197	0.873733	1994|2521|3178|3187|3188|4670|4809|4904|5094|9343|10992|23451|57819	ELAVL1|FUS|HNRNPA1|HNRNPH1|HNRNPH2|HNRNPM|SNU13|YBX1|PCBP2|EFTUD2|SF3B2|SF3B1|LSM2	-3.846	0	38	0	0	-7.50308	7.99536
1	1	0	-2.79449	-3.97024	0	R-HSA-72172	M110	2	0	Reactome Gene Sets	6	mRNA Splicing		-5.34033	4.71628	6.23604	28133	191	406	13	3.20197	0.873733	1994|2521|3178|3187|3188|4670|4809|4904|5094|9343|10992|23451|57819	ELAVL1|FUS|HNRNPA1|HNRNPH1|HNRNPH2|HNRNPM|SNU13|YBX1|PCBP2|EFTUD2|SF3B2|SF3B1|LSM2	-3.67339	0	38	0	0	-7.50308	7.99536
1	1	0	-2.769	-2.78768	0	GO:0000375	M110	2	0	GO Biological Processes	19	RNA splicing, via transesterification reactions	19_GO:0008152 metabolic process	-4.24555	3.03604	4.88676	28133	388	406	17	4.18719	0.994055	1994|2521|3178|3187|3188|4670|4809|4904|5094|5936|6733|8570|9343|9588|10992|23451|57819	ELAVL1|FUS|HNRNPA1|HNRNPH1|HNRNPH2|HNRNPM|SNU13|YBX1|PCBP2|RBM4|SRPK2|KHSRP|EFTUD2|PRDX6|SF3B2|SF3B1|LSM2	-2.72297	0	38	0	0	-7.50308	7.99536
1	1	0	-2.3376	-3.32237	0	R-HSA-72203	M110	2	0	Reactome Gene Sets	6	Processing of Capped Intron-Containing Pre-mRNA		-4.21533	3.69185	5.11023	28133	244	406	13	3.20197	0.873733	1994|2521|3178|3187|3188|4670|4809|4904|5094|9343|10992|23451|57819	ELAVL1|FUS|HNRNPA1|HNRNPH1|HNRNPH2|HNRNPM|SNU13|YBX1|PCBP2|EFTUD2|SF3B2|SF3B1|LSM2	-2.69464	0	38	0	0	-7.50308	7.99536
0	0	1	0	0	-2.1371	R-HSA-72165	M001	1	0	Reactome Gene Sets	6	mRNA Splicing - Minor Pathway		-3.99499	7.99536	6.10966	28133	52	406	6	1.47783	0.598848	4809|4904|9343|10992|23451|57819	SNU13|YBX1|EFTUD2|SF3B2|SF3B1|LSM2	-2.51057	0	38	0	0	-7.50308	7.99536
1	1	0	-2.13651	-2.8088	0	GO:0000377	M110	2	0	GO Biological Processes	19	RNA splicing, via transesterification reactions with bulged adenosine as nucleophile	19_GO:0008152 metabolic process	-3.76689	2.87971	4.49384	28133	385	406	16	3.94089	0.965613	1994|2521|3178|3187|3188|4670|4809|4904|5094|5936|6733|9343|9588|10992|23451|57819	ELAVL1|FUS|HNRNPA1|HNRNPH1|HNRNPH2|HNRNPM|SNU13|YBX1|PCBP2|RBM4|SRPK2|EFTUD2|PRDX6|SF3B2|SF3B1|LSM2	-2.31968	0	38	0	0	-7.50308	7.99536
1	1	0	-2.13651	-2.8088	0	GO:0000398	M110	2	0	GO Biological Processes	19	mRNA splicing, via spliceosome	19_GO:0008152 metabolic process	-3.76689	2.87971	4.49384	28133	385	406	16	3.94089	0.965613	1994|2521|3178|3187|3188|4670|4809|4904|5094|5936|6733|9343|9588|10992|23451|57819	ELAVL1|FUS|HNRNPA1|HNRNPH1|HNRNPH2|HNRNPM|SNU13|YBX1|PCBP2|RBM4|SRPK2|EFTUD2|PRDX6|SF3B2|SF3B1|LSM2	-2.31968	0	38	0	0	-7.50308	7.99536
1	1	0	-2.25136	-2.21839	0	GO:0008380	M110	2	0	GO Biological Processes	19	RNA splicing	19_GO:0008152 metabolic process	-3.14518	2.44395	3.86929	28133	482	406	17	4.18719	0.994055	1994|2521|3178|3187|3188|4670|4809|4904|5094|5936|6733|8570|9343|9588|10992|23451|57819	ELAVL1|FUS|HNRNPA1|HNRNPH1|HNRNPH2|HNRNPM|SNU13|YBX1|PCBP2|RBM4|SRPK2|KHSRP|EFTUD2|PRDX6|SF3B2|SF3B1|LSM2	-1.79402	0	38	0	0	-7.50308	7.99536
0	1	0	0	-2.03733	0	GO:0043484	M010	1	0	GO Biological Processes	19	regulation of RNA splicing	19_GO:0050789 regulation of biological process	-2.28256	3.34518	3.426	28133	145	406	7	1.72414	0.646021	2521|3178|3187|3188|5936|6733|9588	FUS|HNRNPA1|HNRNPH1|HNRNPH2|RBM4|SRPK2|PRDX6	-1.05367	0	38	0	0	-7.50308	7.99536
1	1	1	-3.18625	-4.52561	-3.69984	GO:0051017	M111	3	0	GO Biological Processes	19	actin filament bundle assembly	19_GO:0071840 cellular component organization or biogenesis	-7.17028	6.21861	7.90913	28133	156	406	14	3.44828	0.905562	408|2039|2185|3925|4082|5217|5879|5962|6714|7082|7430|8452|9647|23122	ARRB1|DMTN|PTK2B|STMN1|MARCKS|PFN2|RAC1|RDX|SRC|TJP1|EZR|CUL3|PPM1F|CLASP2	-5.20931	0	39	1	1	-7.17028	10.4739
1	1	1	-3.13662	-4.45526	-3.63246	GO:0061572	M111	3	0	GO Biological Processes	19	actin filament bundle organization	19_GO:0071840 cellular component organization or biogenesis	-7.03227	6.06315	7.77182	28133	160	406	14	3.44828	0.905562	408|2039|2185|3925|4082|5217|5879|5962|6714|7082|7430|8452|9647|23122	ARRB1|DMTN|PTK2B|STMN1|MARCKS|PFN2|RAC1|RDX|SRC|TJP1|EZR|CUL3|PPM1F|CLASP2	-5.09166	0	39	0	0	-7.17028	10.4739
1	1	1	-2.77465	-4.84786	-3.14369	GO:0031032	M111	3	0	GO Biological Processes	19	actomyosin structure organization	19_GO:0071840 cellular component organization or biogenesis	-6.81027	5.38547	7.39765	28133	193	406	15	3.69458	0.936149	88|408|1465|2185|3925|4629|5217|5879|6714|7082|8452|9647|23122|79784|399687	ACTN2|ARRB1|CSRP1|PTK2B|STMN1|MYH11|PFN2|RAC1|SRC|TJP1|CUL3|PPM1F|CLASP2|MYH14|MYO18A	-4.92704	0	39	0	0	-7.17028	10.4739
1	1	1	-2.89869	-4.51383	-2.87882	GO:0030038	M111	3	0	GO Biological Processes	19	contractile actin filament bundle assembly	19_GO:0071840 cellular component organization or biogenesis	-5.48659	6.53709	6.91127	28133	106	406	10	2.46305	0.769234	408|2185|3925|5217|5879|6714|7082|8452|9647|23122	ARRB1|PTK2B|STMN1|PFN2|RAC1|SRC|TJP1|CUL3|PPM1F|CLASP2	-3.79793	0	39	0	0	-7.17028	10.4739
1	1	1	-2.89869	-4.51383	-2.87882	GO:0043149	M111	3	0	GO Biological Processes	19	stress fiber assembly	19_GO:0071840 cellular component organization or biogenesis	-5.48659	6.53709	6.91127	28133	106	406	10	2.46305	0.769234	408|2185|3925|5217|5879|6714|7082|8452|9647|23122	ARRB1|PTK2B|STMN1|PFN2|RAC1|SRC|TJP1|CUL3|PPM1F|CLASP2	-3.79793	0	39	0	0	-7.17028	10.4739
1	1	0	-3.25762	-3.9217	0	GO:0035023	M110	2	0	GO Biological Processes	19	regulation of Rho protein signal transduction	19_GO:0023052 signaling	-3.9217	10.4739	6.57405	28133	85	158	5	3.16456	1.39266	348|408|3925|5879|8452	APOE|ARRB1|STMN1|RAC1|CUL3	-2.50081	0	39	0	0	-7.17028	10.4739
1	1	0	-2.39986	-3.16159	0	GO:0007265	M110	2	0	GO Biological Processes	19	Ras protein signal transduction	19_GO:0023052 signaling	-3.16159	4.20193	4.45739	28133	339	158	8	5.06329	1.74423	348|408|3925|5879|5898|5962|8452|10155	APOE|ARRB1|STMN1|RAC1|RALA|RDX|CUL3|TRIM28	-1.94538	0	39	0	0	-7.17028	10.4739
0	1	0	0	-3.12096	0	GO:0046578	M010	1	0	GO Biological Processes	19	regulation of Ras protein signal transduction	19_GO:0023052 signaling	-3.12096	5.59341	4.78704	28133	191	158	6	3.79747	1.52059	348|408|3925|5879|5962|8452	APOE|ARRB1|STMN1|RAC1|RDX|CUL3	-1.91647	0	39	0	0	-7.17028	10.4739
1	1	0	-2.51564	-2.99518	0	GO:0007266	M110	2	0	GO Biological Processes	19	Rho protein signal transduction	19_GO:0023052 signaling	-3.10173	4.10626	4.37777	28133	135	406	8	1.97044	0.689759	348|408|1012|1278|3925|5879|8452|10211	APOE|ARRB1|CDH13|COL1A2|STMN1|RAC1|CUL3|FLOT1	-1.75776	0	39	0	0	-7.17028	10.4739
1	1	0	-2.15809	-2.11654	0	GO:0007264	M110	2	0	GO Biological Processes	19	small GTPase mediated signal transduction	19_GO:0023052 signaling	-2.54934	2.20855	3.30619	28133	502	406	16	3.94089	0.965613	348|408|1012|1278|3925|4924|5879|5898|5962|6714|7204|8452|9693|10155|10211|10787	APOE|ARRB1|CDH13|COL1A2|STMN1|NUCB1|RAC1|RALA|RDX|SRC|TRIO|CUL3|RAPGEF2|TRIM28|FLOT1|NCKAP1	-1.2839	0	39	0	0	-7.17028	10.4739
0	1	0	0	-2.01725	0	GO:0051056	M010	1	0	GO Biological Processes	19	regulation of small GTPase mediated signal transduction	19_GO:0023052 signaling	-2.01725	3.33857	3.16188	28133	320	158	6	3.79747	1.52059	348|408|3925|5879|5962|8452	APOE|ARRB1|STMN1|RAC1|RDX|CUL3	-1.09244	0	39	0	0	-7.17028	10.4739
1	1	1	-3.11794	-3.32237	-3.94933	GO:0016197	M111	3	0	GO Biological Processes	19	endosomal transport	19_GO:0051179 localization	-6.94519	4.8278	7.26674	28133	244	406	17	4.18719	0.994055	88|400|6643|7314|7874|8411|8546|8943|9201|23325|30845|54732|55207|55737|57020|65009|112936	ACTN2|ARL1|SNX2|UBB|USP7|EEA1|AP3B1|AP3D1|DCLK1|WASHC4|EHD3|TMED9|ARL8B|VPS35|VPS35L|NDRG4|VPS26B	-5.03362	0	40	1	1	-6.94519	5.67312
1	1	1	-2.15334	-3.37345	-2.69262	GO:0016482	M111	3	0	GO Biological Processes	19	cytosolic transport	19_GO:0051179 localization	-6.67344	5.67312	7.41708	28133	171	406	14	3.44828	0.905562	400|5605|5962|6643|6714|7430|7874|8411|8499|30845|54732|54832|55737|112936	ARL1|MAP2K2|RDX|SNX2|SRC|EZR|USP7|EEA1|PPFIA2|EHD3|TMED9|VPS13C|VPS35|VPS26B	-4.81833	0	40	0	0	-6.94519	5.67312
1	1	0	-4.55167	-4.61903	0	hsa04144	M110	2	0	KEGG Pathway	24	Endocytosis		-6.2988	4.3468	6.69916	28133	271	406	17	4.18719	0.994055	381|408|829|1175|1211|1212|6643|6714|7314|8411|10095|23111|23325|30845|55737|60682|112936	ARF5|ARRB1|CAPZA1|AP2S1|CLTA|CLTB|SNX2|SRC|UBB|EEA1|ARPC1B|SPART|WASHC4|EHD3|VPS35|SMAP1|VPS26B	-4.48396	0	40	0	0	-6.94519	5.67312
1	1	0	-4.68011	-4.76078	0	ko04144	M110	2	0	KEGG Pathway	24	Endocytosis		-5.85416	4.26419	6.39856	28133	260	406	16	3.94089	0.965613	381|408|829|1175|1211|1212|6643|6714|8411|10095|23111|23325|30845|55737|60682|112936	ARF5|ARRB1|CAPZA1|AP2S1|CLTA|CLTB|SNX2|SRC|EEA1|ARPC1B|SPART|WASHC4|EHD3|VPS35|SMAP1|VPS26B	-4.09732	0	40	0	0	-6.94519	5.67312
1	0	0	-2.05229	0	0	GO:0042147	M100	1	0	GO Biological Processes	19	retrograde transport, endosome to Golgi	19_GO:0051179 localization	-3.30974	5.05262	4.81302	28133	96	406	7	1.72414	0.646021	400|6643|7874|30845|54732|55737|112936	ARL1|SNX2|USP7|EHD3|TMED9|VPS35|VPS26B	-1.93175	0	40	0	0	-6.94519	5.67312
1	1	1	-4.46197	-2.9807	-2.85472	GO:0009410	M111	3	0	GO Biological Processes	19	response to xenobiotic stimulus	19_GO:0050896 response to stimulus	-6.81511	4.47052	7.04961	28133	279	406	18	4.4335	1.02156	358|445|1020|2185|2235|2775|2944|2950|4259|5138|5577|5582|6647|9343|9456|11335|80777|84152	AQP1|ASS1|CDK5|PTK2B|FECH|GNAO1|GSTM1|GSTP1|MGST3|PDE2A|PRKAR2B|PRKCG|SOD1|EFTUD2|HOMER1|CBX3|CYB5B|PPP1R1B	-4.93042	0	41	1	1	-6.81511	8.05734
1	1	1	-2.63629	-3.14547	-2.56475	GO:0060359	M111	3	0	GO Biological Processes	19	response to ammonium ion	19_GO:0050896 response to stimulus	-5.67713	6.09779	6.91207	28133	125	406	11	2.70936	0.80576	445|493|1020|2185|2775|4062|5582|9343|9456|84152|375790	ASS1|ATP2B4|CDK5|PTK2B|GNAO1|LY6H|PRKCG|EFTUD2|HOMER1|PPP1R1B|AGRN	-3.95169	0	41	0	0	-6.81511	8.05734
0	1	0	0	-3.30388	0	GO:0072347	M010	1	0	GO Biological Processes	19	response to anesthetic	19_GO:0050896 response to stimulus	-4.37739	7.46233	6.31179	28133	65	406	7	1.72414	0.646021	1020|2185|2775|5582|9343|9456|84152	CDK5|PTK2B|GNAO1|PRKCG|EFTUD2|HOMER1|PPP1R1B	-2.83605	0	41	0	0	-6.81511	8.05734
0	1	1	0	-2.6228	-2.15611	GO:0043279	M011	2	0	GO Biological Processes	19	response to alkaloid	19_GO:0050896 response to stimulus	-4.01886	5.59944	5.54743	28133	99	406	8	1.97044	0.689759	1020|2185|2775|5582|7442|9343|9456|84152	CDK5|PTK2B|GNAO1|PRKCG|TRPV1|EFTUD2|HOMER1|PPP1R1B	-2.53386	0	41	0	0	-6.81511	8.05734
0	1	0	0	-2.74016	0	GO:0042220	M010	1	0	GO Biological Processes	19	response to cocaine	19_GO:0050896 response to stimulus	-3.42663	8.05734	5.60417	28133	43	406	5	1.23153	0.547354	1020|2185|9343|9456|84152	CDK5|PTK2B|EFTUD2|HOMER1|PPP1R1B	-2.03199	0	41	0	0	-6.81511	8.05734
1	1	1	-3.04249	-5.37178	-3.49704	GO:0021762	M111	3	0	GO Biological Processes	19	substantia nigra development	19_GO:0032502 developmental process	-6.78581	12.8917	9.44312	28133	43	406	8	1.97044	0.689759	515|805|1340|6271|10409|11240|54145|59345	ATP5PB|CALM2|COX6B1|S100A1|BASP1|PADI2|H2BS1|GNB4	-4.90835	0	42	1	1	-6.78581	12.8917
1	1	1	-2.6232	-4.6513	-2.94404	GO:0048857	M111	3	0	GO Biological Processes	19	neural nucleus development	19_GO:0032502 developmental process	-5.63211	9.23908	7.73075	28133	60	406	8	1.97044	0.689759	515|805|1340|6271|10409|11240|54145|59345	ATP5PB|CALM2|COX6B1|S100A1|BASP1|PADI2|H2BS1|GNB4	-3.91786	0	42	0	0	-6.78581	12.8917
1	1	1	-2.18343	-3.89764	-2.37163	GO:0030901	M111	3	0	GO Biological Processes	19	midbrain development	19_GO:0032502 developmental process	-4.457	6.44587	6.12048	28133	86	406	8	1.97044	0.689759	515|805|1340|6271|10409|11240|54145|59345	ATP5PB|CALM2|COX6B1|S100A1|BASP1|PADI2|H2BS1|GNB4	-2.90155	0	42	0	0	-6.78581	12.8917
0	0	1	0	0	-6.53908	GO:0031102	M001	1	0	GO Biological Processes	19	neuron projection regeneration	19_GO:0032502 developmental process	-6.53908	15.8662	9.92226	28133	58	214	7	3.27103	1.21594	2596|3371|4035|4974|7070|7143|10752	GAP43|TNC|LRP1|OMG|THY1|TNR|CHL1	-4.40162	0	43	1	1	-6.53908	15.8662
1	1	1	-2.31682	-2.02755	-4.56371	GO:0048678	M111	3	0	GO Biological Processes	19	response to axon injury	19_GO:0050896 response to stimulus	-4.56371	10.2438	7.11119	28133	77	214	6	2.80374	1.12846	2596|3371|4035|6647|7143|10752	GAP43|TNC|LRP1|SOD1|TNR|CHL1	-2.95685	0	43	0	0	-6.53908	15.8662
0	0	1	0	0	-4.32583	GO:0031103	M001	1	0	GO Biological Processes	19	axon regeneration	19_GO:0032502 developmental process	-4.32583	12.6406	7.35579	28133	52	214	5	2.33645	1.03261	2596|3371|4035|7143|10752	GAP43|TNC|LRP1|TNR|CHL1	-2.7982	0	43	0	0	-6.53908	15.8662
0	0	1	0	0	-3.93004	GO:0031099	M001	1	0	GO Biological Processes	19	regeneration	19_GO:0032502 developmental process	-3.93004	5.47761	5.45046	28133	192	214	8	3.73832	1.29676	2596|2950|3371|4035|4974|7070|7143|10752	GAP43|GSTP1|TNC|LRP1|OMG|THY1|TNR|CHL1	-2.50664	0	43	0	0	-6.53908	15.8662
0	0	1	0	0	-3.57775	M159	M001	1	0	Canonical Pathways	11	PID AMB2 NEUTROPHILS PATHWAY		-3.57775	12.8256	6.6341	28133	41	214	4	1.86916	0.925804	3146|4035|6714|7070	HMGB1|LRP1|SRC|THY1	-2.24904	0	43	0	0	-6.53908	15.8662
0	0	1	0	0	-3.49704	M53	M001	1	0	Canonical Pathways	11	PID INTEGRIN3 PATHWAY		-3.49704	12.2291	6.45149	28133	43	214	4	1.86916	0.925804	1278|3146|3371|7070	COL1A2|HMGB1|TNC|THY1	-2.18851	0	43	0	0	-6.53908	15.8662
0	0	1	0	0	-2.73769	GO:0070570	M001	1	0	GO Biological Processes	19	regulation of neuron projection regeneration	19_GO:0032502 developmental process	-2.73769	12.3246	5.61171	28133	32	214	3	1.40187	0.803676	4035|7070|7143	LRP1|THY1|TNR	-1.63957	0	43	0	0	-6.53908	15.8662
1	1	1	-3.42485	-2.1468	-4.25949	GO:0030198	M111	3	0	GO Biological Processes	19	extracellular matrix organization	19_GO:0071840 cellular component organization or biogenesis	-6.43268	3.68394	6.50048	28133	395	406	21	5.17241	1.09913	102|176|822|826|871|960|1278|2244|2934|3371|3691|3696|4035|4629|7087|7143|7450|10211|23122|80781|375790	ADAM10|ACAN|CAPG|CAPNS1|SERPINH1|CD44|COL1A2|FGB|GSN|TNC|ITGB4|ITGB8|LRP1|MYH11|ICAM5|TNR|VWF|FLOT1|CLASP2|COL18A1|AGRN	-4.60653	0	44	1	1	-6.43268	32.8657
0	0	1	0	0	-5.36512	hsa04512	M001	1	0	KEGG Pathway	24	ECM-receptor interaction		-6.32955	8.05734	7.93156	28133	86	406	10	2.46305	0.769234	960|1278|3371|3691|3696|7143|7450|9900|84823|375790	CD44|COL1A2|TNC|ITGB4|ITGB8|TNR|VWF|SV2A|LMNB2|AGRN	-4.51097	0	44	0	0	-6.43268	32.8657
1	1	1	-3.01207	-2.35424	-3.66758	GO:0043062	M111	3	0	GO Biological Processes	19	extracellular structure organization	19_GO:0071840 cellular component organization or biogenesis	-5.9858	3.33577	6.09185	28133	457	406	22	5.41872	1.12354	102|176|348|822|826|871|960|1278|2244|2934|3371|3691|3696|4035|4629|7087|7143|7450|10211|23122|80781|375790	ADAM10|ACAN|APOE|CAPG|CAPNS1|SERPINH1|CD44|COL1A2|FGB|GSN|TNC|ITGB4|ITGB8|LRP1|MYH11|ICAM5|TNR|VWF|FLOT1|CLASP2|COL18A1|AGRN	-4.21796	0	44	0	0	-6.43268	32.8657
1	0	1	-2.65368	0	-4.67057	R-HSA-1474244	M101	2	0	Reactome Gene Sets	6	Extracellular matrix organization		-5.67166	3.91356	6.14961	28133	301	406	17	4.18719	0.994055	102|176|726|826|871|960|1278|2244|3371|3691|3696|5339|7087|7143|7450|80781|375790	ADAM10|ACAN|CAPN5|CAPNS1|SERPINH1|CD44|COL1A2|FGB|TNC|ITGB4|ITGB8|PLEC|ICAM5|TNR|VWF|COL18A1|AGRN	-3.94723	0	44	0	0	-6.43268	32.8657
0	0	1	0	0	-5.50422	ko04512	M001	1	0	KEGG Pathway	24	ECM-receptor interaction		-5.54131	7.60534	7.24836	28133	82	406	9	2.21675	0.73068	960|1278|3371|3691|3696|7143|7450|9900|375790	CD44|COL1A2|TNC|ITGB4|ITGB8|TNR|VWF|SV2A|AGRN	-3.84517	0	44	0	0	-6.43268	32.8657
1	0	1	-2.19747	0	-4.31971	R-HSA-216083	M101	2	0	Reactome Gene Sets	6	Integrin cell surface interactions		-5.41017	7.33692	7.08025	28133	85	406	9	2.21675	0.73068	960|1278|2244|3371|3696|7087|7450|80781|375790	CD44|COL1A2|FGB|TNC|ITGB8|ICAM5|VWF|COL18A1|AGRN	-3.73431	0	44	0	0	-6.43268	32.8657
0	0	1	0	0	-4.63358	WP306	M001	1	0	WikiPathways	27	Focal Adhesion		-4.63358	5.94555	6.12959	28133	199	214	9	4.20561	1.37207	1278|2317|3371|3696|5582|5879|6714|7143|7450	COL1A2|FLNB|TNC|ITGB8|PRKCG|RAC1|SRC|TNR|VWF	-3.00137	0	44	0	0	-6.43268	32.8657
0	0	1	0	0	-4.63358	ko04510	M001	1	0	KEGG Pathway	24	Focal adhesion		-4.63358	5.94555	6.12959	28133	199	214	9	4.20561	1.37207	1278|2317|3371|3696|5582|5879|6714|7143|7450	COL1A2|FLNB|TNC|ITGB8|PRKCG|RAC1|SRC|TNR|VWF	-3.00137	0	44	0	0	-6.43268	32.8657
0	0	1	0	0	-4.37065	hsa04510	M001	1	0	KEGG Pathway	24	Focal adhesion		-4.37065	5.50309	5.80289	28133	215	214	9	4.20561	1.37207	1278|2317|3371|3696|5582|5879|6714|7143|7450	COL1A2|FLNB|TNC|ITGB8|PRKCG|RAC1|SRC|TNR|VWF	-2.82666	0	44	0	0	-6.43268	32.8657
0	0	1	0	0	-4.04207	R-HSA-430116	M001	1	0	Reactome Gene Sets	6	GP1b-IX-V activation signalling		-4.04207	32.8657	9.66619	28133	12	214	3	1.40187	0.803676	1278|6714|7450	COL1A2|SRC|VWF	-2.59097	0	44	0	0	-6.43268	32.8657
0	0	1	0	0	-3.5382	R-HSA-3000178	M001	1	0	Reactome Gene Sets	6	ECM proteoglycans		-3.5382	8.64886	5.84575	28133	76	214	5	2.33645	1.03261	176|1278|3371|7143|375790	ACAN|COL1A2|TNC|TNR|AGRN	-2.21923	0	44	0	0	-6.43268	32.8657
0	0	1	0	0	-2.89439	M5884	M001	1	0	Canonical Pathways	11	NABA CORE MATRISOME		-2.89439	3.82437	4.12069	28133	275	214	8	3.73832	1.29676	176|1278|3371|4969|7143|7450|375790|404037	ACAN|COL1A2|TNC|OGN|TNR|VWF|AGRN|HAPLN4	-1.7569	0	44	0	0	-6.43268	32.8657
0	0	1	0	0	-2.48923	R-HSA-76009	M001	1	0	Reactome Gene Sets	6	Platelet Aggregation (Plug Formation)		-2.62736	7.10698	4.61811	28133	39	406	4	0.985222	0.490178	1278|2244|6714|7450	COL1A2|FGB|SRC|VWF	-1.35128	0	44	0	0	-6.43268	32.8657
0	1	1	0	-2.40694	-6.37947	GO:0080135	M011	2	0	GO Biological Processes	19	regulation of cellular response to stress	19_GO:0050896 response to stimulus	-6.37947	3.62775	6.43398	28133	761	214	21	9.81308	2.03361	637|2023|2185|2521|2950|3146|4035|4137|4904|5478|5582|5591|5716|6647|7070|7143|7430|29978|51060|54832|140885	BID|ENO1|PTK2B|FUS|GSTP1|HMGB1|LRP1|MAPT|YBX1|PPIA|PRKCG|PRKDC|PSMD10|SOD1|THY1|TNR|EZR|UBQLN2|TXNDC12|VPS13C|SIRPA	-4.27099	0	45	1	1	-6.37947	3.62775
0	1	1	0	-2.21839	-3.45837	GO:0042326	M011	2	0	GO Biological Processes	19	negative regulation of phosphorylation	19_GO:0048519 negative regulation of biological process	-4.06184	2.73147	4.63976	28133	482	406	19	4.6798	1.0482	348|408|805|2039|2873|2950|4137|5300|5478|5577|5591|5716|7070|7430|8396|9647|84152|140885|201626	APOE|ARRB1|CALM2|DMTN|GPS1|GSTP1|MAPT|PIN1|PPIA|PRKAR2B|PRKDC|PSMD10|THY1|EZR|PIP4K2B|PPM1F|PPP1R1B|SIRPA|PDE12	-2.57099	0	45	0	0	-6.37947	3.62775
0	1	1	0	-2.50902	-2.4662	GO:0031400	M011	2	0	GO Biological Processes	19	negative regulation of protein modification process	19_GO:0048519 negative regulation of biological process	-3.83441	2.41592	4.35296	28133	631	406	22	5.41872	1.12354	348|408|493|805|1020|1487|2039|2873|2950|4137|5300|5478|5577|5582|5591|5716|7070|7430|9647|55611|84152|140885	APOE|ARRB1|ATP2B4|CALM2|CDK5|CTBP1|DMTN|GPS1|GSTP1|MAPT|PIN1|PPIA|PRKAR2B|PRKCG|PRKDC|PSMD10|THY1|EZR|PPM1F|OTUB1|PPP1R1B|SIRPA	-2.37859	0	45	0	0	-6.37947	3.62775
0	1	1	0	-2.15428	-2.08692	GO:0051348	M011	2	0	GO Biological Processes	19	negative regulation of transferase activity	19_GO:0065007 biological regulation	-3.34913	3.01274	4.23397	28133	299	406	13	3.20197	0.873733	348|1974|2873|2950|4137|5478|5577|6714|7070|8396|9647|29085|84152	APOE|EIF4A2|GPS1|GSTP1|MAPT|PPIA|PRKAR2B|SRC|THY1|PIP4K2B|PPM1F|PHPT1|PPP1R1B	-1.96519	0	45	0	0	-6.37947	3.62775
0	0	1	0	0	-2.67696	GO:0001933	M001	1	0	GO Biological Processes	19	negative regulation of protein phosphorylation	19_GO:0048519 negative regulation of biological process	-3.13184	2.51975	3.88799	28133	440	406	16	3.94089	0.965613	348|408|805|2039|2873|2950|5300|5478|5577|5591|5716|7070|7430|9647|84152|140885	APOE|ARRB1|CALM2|DMTN|GPS1|GSTP1|PIN1|PPIA|PRKAR2B|PRKDC|PSMD10|THY1|EZR|PPM1F|PPP1R1B|SIRPA	-1.78153	0	45	0	0	-6.37947	3.62775
0	0	1	0	0	-2.6368	GO:0045936	M001	1	0	GO Biological Processes	19	negative regulation of phosphate metabolic process	19_GO:0048519 negative regulation of biological process	-2.88489	2.19063	3.57032	28133	601	406	19	4.6798	1.0482	348|408|805|2039|2873|2950|4137|5300|5478|5577|5591|5716|7070|7430|8396|9647|84152|140885|201626	APOE|ARRB1|CALM2|DMTN|GPS1|GSTP1|MAPT|PIN1|PPIA|PRKAR2B|PRKDC|PSMD10|THY1|EZR|PIP4K2B|PPM1F|PPP1R1B|SIRPA|PDE12	-1.5717	0	45	0	0	-6.37947	3.62775
0	0	1	0	0	-2.63091	GO:0010563	M001	1	0	GO Biological Processes	19	negative regulation of phosphorus metabolic process	19_GO:0048519 negative regulation of biological process	-2.87662	2.18699	3.56243	28133	602	406	19	4.6798	1.0482	348|408|805|2039|2873|2950|4137|5300|5478|5577|5591|5716|7070|7430|8396|9647|84152|140885|201626	APOE|ARRB1|CALM2|DMTN|GPS1|GSTP1|MAPT|PIN1|PPIA|PRKAR2B|PRKDC|PSMD10|THY1|EZR|PIP4K2B|PPM1F|PPP1R1B|SIRPA|PDE12	-1.56499	0	45	0	0	-6.37947	3.62775
0	1	1	0	-3.69081	-2.90633	ko04810	M011	2	0	KEGG Pathway	24	Regulation of actin cytoskeleton		-6.28408	4.90281	6.90227	28133	212	406	15	3.69458	0.936149	2934|3691|3696|5217|5605|5879|5962|6714|7430|8396|8826|10095|10787|55740|79784	GSN|ITGB4|ITGB8|PFN2|MAP2K2|RAC1|RDX|SRC|EZR|PIP4K2B|IQGAP1|ARPC1B|NCKAP1|ENAH|MYH14	-4.47048	0	46	1	1	-6.28408	12.8321
0	1	1	0	-3.40884	-2.64191	hsa04810	M011	2	0	KEGG Pathway	24	Regulation of actin cytoskeleton		-5.69855	4.40422	6.35488	28133	236	406	15	3.69458	0.936149	2934|3691|3696|5217|5605|5879|5962|6714|7430|8396|8826|10095|10787|55740|79784	GSN|ITGB4|ITGB8|PFN2|MAP2K2|RAC1|RDX|SRC|EZR|PIP4K2B|IQGAP1|ARPC1B|NCKAP1|ENAH|MYH14	-3.9704	0	46	0	0	-6.28408	12.8321
0	1	0	0	-3.33683	0	GO:1903649	M010	1	0	GO Biological Processes	19	regulation of cytoplasmic transport	19_GO:0051179 localization	-4.4208	12.8321	7.44311	28133	27	406	5	1.23153	0.547354	5605|5962|6714|7430|7874	MAP2K2|RDX|SRC|EZR|USP7	-2.87146	0	46	0	0	-6.28408	12.8321
0	1	1	0	-2.23011	-3.01534	ko05205	M011	2	0	KEGG Pathway	24	Proteoglycans in cancer		-3.71781	3.7548	4.76666	28133	203	406	11	2.70936	0.80576	960|2317|2318|2817|5582|5605|5879|5962|6714|7430|8826	CD44|FLNB|FLNC|GPC1|PRKCG|MAP2K2|RAC1|RDX|SRC|EZR|IQGAP1	-2.28007	0	46	0	0	-6.28408	12.8321
0	1	0	0	-2.83141	0	GO:0045022	M010	1	0	GO Biological Processes	19	early endosome to late endosome transport	19_GO:0051179 localization	-3.57646	8.66164	5.86765	28133	40	406	5	1.23153	0.547354	5605|5962|6714|7430|8411	MAP2K2|RDX|SRC|EZR|EEA1	-2.15956	0	46	0	0	-6.28408	12.8321
0	1	1	0	-2.10271	-2.83681	hsa05205	M011	2	0	KEGG Pathway	24	Proteoglycans in cancer		-3.45198	3.49644	4.47757	28133	218	406	11	2.70936	0.80576	960|2317|2318|2817|5582|5605|5879|5962|6714|7430|8826	CD44|FLNB|FLNC|GPC1|PRKCG|MAP2K2|RAC1|RDX|SRC|EZR|IQGAP1	-2.05116	0	46	0	0	-6.28408	12.8321
0	1	0	0	-2.77958	0	WP51	M010	1	0	WikiPathways	27	Regulation of Actin Cytoskeleton		-3.44122	4.13005	4.66673	28133	151	406	9	2.21675	0.73068	2934|5605|5879|5962|7430|8396|8826|10787|55740	GSN|MAP2K2|RAC1|RDX|EZR|PIP4K2B|IQGAP1|NCKAP1|ENAH	-2.04231	0	46	0	0	-6.28408	12.8321
0	1	1	0	-2.09461	-2.82546	GO:1902115	M011	2	0	GO Biological Processes	19	regulation of organelle assembly	19_GO:0071840 cellular component organization or biogenesis	-3.43513	3.48048	4.45921	28133	219	406	11	2.70936	0.80576	822|1778|2596|2934|4134|5962|6714|7430|8396|29978|94030	CAPG|DYNC1H1|GAP43|GSN|MAP4|RDX|SRC|EZR|PIP4K2B|UBQLN2|LRRC4B	-2.0367	0	46	0	0	-6.28408	12.8321
0	1	0	0	-2.74016	0	GO:0098927	M010	1	0	GO Biological Processes	19	vesicle-mediated transport between endosomal compartments	19_GO:0051179 localization	-3.42663	8.05734	5.60417	28133	43	406	5	1.23153	0.547354	5605|5962|6714|7430|8411	MAP2K2|RDX|SRC|EZR|EEA1	-2.03199	0	46	0	0	-6.28408	12.8321
1	1	1	-2.36903	-4.29521	-3.93112	GO:0007420	M111	3	0	GO Biological Processes	19	brain development	19_GO:0032502 developmental process	-6.21198	2.83028	5.97725	28133	710	406	29	7.14286	1.27815	358|493|515|805|1000|1020|1340|2775|3925|4035|4724|5533|5591|6271|6714|7143|7155|7314|9201|9693|10409|10763|11240|23654|26047|54145|55201|59345|65009	AQP1|ATP2B4|ATP5PB|CALM2|CDH2|CDK5|COX6B1|GNAO1|STMN1|LRP1|NDUFS4|PPP3CC|PRKDC|S100A1|SRC|TNR|TOP2B|UBB|DCLK1|RAPGEF2|BASP1|NES|PADI2|PLXNB2|CNTNAP2|H2BS1|MAP1S|GNB4|NDRG4	-4.40937	0	47	1	1	-6.21198	2.83028
1	1	1	-2.21328	-4.03647	-3.65554	GO:0060322	M111	3	0	GO Biological Processes	19	head development	19_GO:0032502 developmental process	-5.72563	2.67577	5.63265	28133	751	406	29	7.14286	1.27815	358|493|515|805|1000|1020|1340|2775|3925|4035|4724|5533|5591|6271|6714|7143|7155|7314|9201|9693|10409|10763|11240|23654|26047|54145|55201|59345|65009	AQP1|ATP2B4|ATP5PB|CALM2|CDH2|CDK5|COX6B1|GNAO1|STMN1|LRP1|NDUFS4|PPP3CC|PRKDC|S100A1|SRC|TNR|TOP2B|UBB|DCLK1|RAPGEF2|BASP1|NES|PADI2|PLXNB2|CNTNAP2|H2BS1|MAP1S|GNB4|NDRG4	-3.99271	0	47	0	0	-6.21198	2.83028
0	0	1	0	0	-2.19813	GO:0030900	M001	1	0	GO Biological Processes	19	forebrain development	19_GO:0032502 developmental process	-2.6419	2.51623	3.49375	28133	358	406	13	3.20197	0.873733	358|493|1000|1020|2775|4035|6714|7143|7155|7314|9201|9693|26047	AQP1|ATP2B4|CDH2|CDK5|GNAO1|LRP1|SRC|TNR|TOP2B|UBB|DCLK1|RAPGEF2|CNTNAP2	-1.36254	0	47	0	0	-6.21198	2.83028
1	1	1	-3.13662	-2.66968	-3.63246	GO:2001242	M111	3	0	GO Biological Processes	19	regulation of intrinsic apoptotic signaling pathway	19_GO:0023052 signaling	-6.20172	5.63006	7.10705	28133	160	406	13	3.20197	0.873733	637|960|2023|4282|5478|6647|6714|7178|7314|8575|10134|10525|51060	BID|CD44|ENO1|MIF|PPIA|SOD1|SRC|TPT1|UBB|PRKRA|BCAP31|HYOU1|TXNDC12	-4.40152	0	48	1	1	-6.20172	6.56461
1	1	1	-2.78802	-2.26732	-3.47093	GO:0097193	M111	3	0	GO Biological Processes	19	intrinsic apoptotic signaling pathway	19_GO:0023052 signaling	-5.37872	3.91763	5.96929	28133	283	406	16	3.94089	0.965613	637|960|2023|4282|5478|5591|6647|6714|7178|7314|8452|8575|9647|10134|10525|51060	BID|CD44|ENO1|MIF|PPIA|PRKDC|SOD1|SRC|TPT1|UBB|CUL3|PRKRA|PPM1F|BCAP31|HYOU1|TXNDC12	-3.70645	0	48	0	0	-6.20172	6.56461
1	1	1	-2.09996	-2.16416	-3.65021	GO:2001233	M111	3	0	GO Biological Processes	19	regulation of apoptotic signaling pathway	19_GO:0023052 signaling	-5.29154	3.35859	5.69046	28133	392	406	19	4.6798	1.0482	637|960|2023|2244|2934|2950|4282|5478|5533|5716|6647|6714|7178|7314|7857|8575|10134|10525|51060	BID|CD44|ENO1|FGB|GSN|GSTP1|MIF|PPIA|PPP3CC|PSMD10|SOD1|SRC|TPT1|UBB|SCG2|PRKRA|BCAP31|HYOU1|TXNDC12	-3.63334	0	48	0	0	-6.20172	6.56461
0	0	1	0	0	-3.09241	GO:2001243	M001	1	0	GO Biological Processes	19	negative regulation of intrinsic apoptotic signaling pathway	19_GO:0048519 negative regulation of biological process	-5.00979	6.56461	6.57408	28133	95	406	9	2.21675	0.73068	637|960|2023|4282|5478|6714|7178|10525|51060	BID|CD44|ENO1|MIF|PPIA|SRC|TPT1|HYOU1|TXNDC12	-3.38408	0	48	0	0	-6.20172	6.56461
1	1	1	-3.01082	-4.01635	-2.34902	GO:1902532	M111	3	0	GO Biological Processes	19	negative regulation of intracellular signal transduction	19_GO:0048519 negative regulation of biological process	-4.95747	2.79604	5.24205	28133	570	406	23	5.66502	1.14729	348|408|493|637|805|960|2023|2873|2950|3925|4282|5138|5300|5478|5716|6714|7178|7430|8452|8904|10525|51060|140885	APOE|ARRB1|ATP2B4|BID|CALM2|CD44|ENO1|GPS1|GSTP1|STMN1|MIF|PDE2A|PIN1|PPIA|PSMD10|SRC|TPT1|EZR|CUL3|CPNE1|HYOU1|TXNDC12|SIRPA	-3.33813	0	48	0	0	-6.20172	6.56461
1	0	1	-2.34995	0	-3.23479	GO:0097190	M101	2	0	GO Biological Processes	19	apoptotic signaling pathway	19_GO:0023052 signaling	-4.77863	2.72434	5.09998	28133	585	406	23	5.66502	1.14729	637|952|960|2023|2244|2934|2950|4282|5478|5533|5591|5716|6647|6714|7178|7314|7857|8452|8575|9647|10134|10525|51060	BID|CD38|CD44|ENO1|FGB|GSN|GSTP1|MIF|PPIA|PPP3CC|PRKDC|PSMD10|SOD1|SRC|TPT1|UBB|SCG2|CUL3|PRKRA|PPM1F|BCAP31|HYOU1|TXNDC12	-3.1809	0	48	0	0	-6.20172	6.56461
0	0	1	0	0	-3.47487	GO:2001234	M001	1	0	GO Biological Processes	19	negative regulation of apoptotic signaling pathway	19_GO:0048519 negative regulation of biological process	-4.5988	4.02147	5.49392	28133	224	406	13	3.20197	0.873733	637|960|2023|2244|2950|4282|5478|5716|6714|7178|7857|10525|51060	BID|CD44|ENO1|FGB|GSTP1|MIF|PPIA|PSMD10|SRC|TPT1|SCG2|HYOU1|TXNDC12	-3.02664	0	48	0	0	-6.20172	6.56461
0	1	1	0	-2.05476	-2.76965	GO:2001020	M011	2	0	GO Biological Processes	19	regulation of response to DNA damage stimulus	19_GO:0050896 response to stimulus	-3.95753	3.71213	4.93145	28133	224	406	12	2.95567	0.840523	637|960|2521|3146|4137|4282|5582|5591|5716|7178|10155|55611	BID|CD44|FUS|HMGB1|MAPT|MIF|PRKCG|PRKDC|PSMD10|TPT1|TRIM28|OTUB1	-2.48115	0	48	0	0	-6.20172	6.56461
1	0	0	-2.24071	0	0	GO:2001021	M100	1	0	GO Biological Processes	19	negative regulation of response to DNA damage stimulus	19_GO:0048519 negative regulation of biological process	-2.91687	5.07023	4.46646	28133	82	406	6	1.47783	0.598848	637|960|4282|5716|7178|55611	BID|CD44|MIF|PSMD10|TPT1|OTUB1	-1.59896	0	48	0	0	-6.20172	6.56461
0	1	1	0	-2.79203	-3.2213	GO:0097581	M011	2	0	GO Biological Processes	19	lamellipodium organization	19_GO:0071840 cellular component organization or biogenesis	-6.18905	7.78574	7.75862	28133	89	406	10	2.46305	0.769234	960|1012|2039|3983|5879|6643|6714|10096|10787|92154	CD44|CDH13|DMTN|ABLIM1|RAC1|SNX2|SRC|ACTR3|NCKAP1|MTSS2	-4.39243	0	49	1	1	-6.18905	17.8057
1	1	1	-4.62478	-5.06112	-2.50582	M186	M111	3	0	Canonical Pathways	11	PID PDGFRB PATHWAY		-5.54271	5.90871	6.76183	28133	129	406	11	2.70936	0.80576	4035|5300|5605|5879|6714|6876|7525|8826|10095|10096|10787	LRP1|PIN1|MAP2K2|RAC1|SRC|TAGLN|YES1|IQGAP1|ARPC1B|ACTR3|NCKAP1	-3.84562	0	49	0	0	-6.18905	17.8057
1	1	0	-3.89659	-3.49363	0	R-HSA-9664407	M110	2	0	Reactome Gene Sets	6	Parasite infection		-4.70443	8.36296	6.79233	28133	58	406	7	1.72414	0.646021	4644|5879|6714|7525|10095|10096|10787	MYO5A|RAC1|SRC|YES1|ARPC1B|ACTR3|NCKAP1	-3.11857	0	49	0	0	-6.18905	17.8057
1	1	0	-3.89659	-3.49363	0	R-HSA-9664417	M110	2	0	Reactome Gene Sets	6	Leishmania phagocytosis		-4.70443	8.36296	6.79233	28133	58	406	7	1.72414	0.646021	4644|5879|6714|7525|10095|10096|10787	MYO5A|RAC1|SRC|YES1|ARPC1B|ACTR3|NCKAP1	-3.11857	0	49	0	0	-6.18905	17.8057
1	1	0	-3.89659	-3.49363	0	R-HSA-9664422	M110	2	0	Reactome Gene Sets	6	FCGR3A-mediated phagocytosis		-4.70443	8.36296	6.79233	28133	58	406	7	1.72414	0.646021	4644|5879|6714|7525|10095|10096|10787	MYO5A|RAC1|SRC|YES1|ARPC1B|ACTR3|NCKAP1	-3.11857	0	49	0	0	-6.18905	17.8057
0	1	0	0	-4.33578	0	WP4659	M010	1	0	WikiPathways	27	Gastrin Signaling Pathway		-4.33578	9.37142	6.73084	28133	114	158	6	3.79747	1.52059	408|960|1994|5879|7082|7525	ARRB1|CD44|ELAVL1|RAC1|TJP1|YES1	-2.80425	0	49	0	0	-6.18905	17.8057
1	1	1	-2.43304	-3.18161	-2.69547	M81	M111	3	0	Canonical Pathways	11	PID CDC42 PATHWAY		-4.16821	6.92931	6.01033	28133	70	406	7	1.72414	0.646021	5879|6714|7525|8826|10095|10096|55740	RAC1|SRC|YES1|IQGAP1|ARPC1B|ACTR3|ENAH	-2.65811	0	49	0	0	-6.18905	17.8057
0	1	0	0	-3.11641	0	M108	M010	1	0	Canonical Pathways	11	PID NETRIN PATHWAY		-4.04958	10.827	6.73053	28133	32	406	5	1.23153	0.547354	5605|5879|6714|7204|7525	MAP2K2|RAC1|SRC|TRIO|YES1	-2.56108	0	49	0	0	-6.18905	17.8057
0	1	0	0	-4.04204	0	R-HSA-3928662	M010	1	0	Reactome Gene Sets	6	EPHB-mediated forward signaling		-4.04204	16.9578	7.77782	28133	42	158	4	2.53165	1.2497	5879|7525|10095|10096	RAC1|YES1|ARPC1B|ACTR3	-2.59097	0	49	0	0	-6.18905	17.8057
0	1	1	0	-2.47959	-2.1142	GO:1902743	M011	2	0	GO Biological Processes	19	regulation of lamellipodium organization	19_GO:0071840 cellular component organization or biogenesis	-3.94808	7.8445	6.03522	28133	53	406	6	1.47783	0.598848	960|2039|5879|6714|10096|10787	CD44|DMTN|RAC1|SRC|ACTR3|NCKAP1	-2.47453	0	49	0	0	-6.18905	17.8057
1	1	0	-2.18343	-3.89764	0	GO:0048013	M110	2	0	GO Biological Processes	19	ephrin receptor signaling pathway	19_GO:0023052 signaling	-3.89764	10.3521	6.52772	28133	86	158	5	3.16456	1.39266	1175|5879|7525|10095|10096	AP2S1|RAC1|YES1|ARPC1B|ACTR3	-2.48068	0	49	0	0	-6.18905	17.8057
1	1	0	-2.91393	-3.49188	0	M164	M110	2	0	Canonical Pathways	11	PID ERBB1 DOWNSTREAM PATHWAY		-3.83959	5.27947	5.3162	28133	105	406	8	1.97044	0.689759	5605|5879|5898|6714|8826|10095|10096|10787	MAP2K2|RAC1|RALA|SRC|IQGAP1|ARPC1B|ACTR3|NCKAP1	-2.38268	0	49	0	0	-6.18905	17.8057
1	1	0	-3.25762	-2.86581	0	R-HSA-2029480	M110	2	0	Reactome Gene Sets	6	Fcgamma receptor (FCGR) dependent phagocytosis		-3.63389	5.70649	5.25857	28133	85	406	7	1.72414	0.646021	4644|5879|6714|7525|10095|10096|10787	MYO5A|RAC1|SRC|YES1|ARPC1B|ACTR3|NCKAP1	-2.20949	0	49	0	0	-6.18905	17.8057
0	1	1	0	-3.48881	-2.03686	GO:0006909	M011	2	0	GO Biological Processes	19	phagocytosis	19_GO:0051179 localization	-3.48881	4.19506	4.72514	28133	382	158	9	5.6962	1.84386	2934|4035|5879|6647|7525|10095|10096|57118|399687	GSN|LRP1|RAC1|SOD1|YES1|ARPC1B|ACTR3|CAMK1D|MYO18A	-2.18566	0	49	0	0	-6.18905	17.8057
0	1	0	0	-2.1074	0	GO:0030032	M010	1	0	GO Biological Processes	19	lamellipodium assembly	19_GO:0071840 cellular component organization or biogenesis	-3.21502	5.77443	4.90849	28133	72	406	6	1.47783	0.598848	1012|2039|3983|5879|10096|10787	CDH13|DMTN|ABLIM1|RAC1|ACTR3|NCKAP1	-1.85307	0	49	0	0	-6.18905	17.8057
0	1	0	0	-3.19979	0	M257	M010	1	0	Canonical Pathways	11	PID EPHRINB REV PATHWAY		-3.19979	17.8057	6.92125	28133	30	158	3	1.89873	1.08578	2244|5879|7525	FGB|RAC1|YES1	-1.97634	0	49	0	0	-6.18905	17.8057
0	1	0	0	-3.19979	0	M76	M010	1	0	Canonical Pathways	11	PID P38 ALPHA BETA PATHWAY		-3.19979	17.8057	6.92125	28133	30	158	3	1.89873	1.08578	5879|5898|7525	RAC1|RALA|YES1	-1.97634	0	49	0	0	-6.18905	17.8057
1	1	0	-2.75462	-2.45654	0	M278	M110	2	0	Canonical Pathways	11	PID RAC1 PATHWAY		-2.96632	6.41603	4.82058	28133	54	406	5	1.23153	0.547354	5879|8826|10095|10096|10787	RAC1|IQGAP1|ARPC1B|ACTR3|NCKAP1	-1.64285	0	49	0	0	-6.18905	17.8057
0	1	0	0	-2.96533	0	R-HSA-5663213	M010	1	0	Reactome Gene Sets	6	RHO GTPases Activate WASPs and WAVEs		-2.96533	14.8381	6.24368	28133	36	158	3	1.89873	1.08578	5879|10095|10096	RAC1|ARPC1B|ACTR3	-1.80536	0	49	0	0	-6.18905	17.8057
0	1	1	0	-2.41182	-2.04832	M99	M011	2	0	Canonical Pathways	11	PID TXA2PATHWAY		-2.89452	6.18688	4.70151	28133	56	406	5	1.23153	0.547354	5582|5879|6714|7525|10681	PRKCG|RAC1|SRC|YES1|GNB5	-1.58015	0	49	0	0	-6.18905	17.8057
1	1	0	-2.6232	-2.32742	0	R-HSA-2029482	M110	2	0	Reactome Gene Sets	6	Regulation of actin dynamics for phagocytic cup formation		-2.75964	5.77443	4.47986	28133	60	406	5	1.23153	0.547354	4644|5879|10095|10096|10787	MYO5A|RAC1|ARPC1B|ACTR3|NCKAP1	-1.46465	0	49	0	0	-6.18905	17.8057
0	1	0	0	-2.50312	0	GO:0045010	M010	1	0	GO Biological Processes	19	actin nucleation	19_GO:0048518 positive regulation of biological process	-2.50312	10.2725	5.02964	28133	52	158	3	1.89873	1.08578	2934|10095|10096	GSN|ARPC1B|ACTR3	-1.46493	0	49	0	0	-6.18905	17.8057
0	1	0	0	-2.10036	0	GO:0002433	M010	1	0	GO Biological Processes	19	immune response-regulating cell surface receptor signaling pathway involved in phagocytosis	19_GO:0002376 immune system process	-2.10036	5.12394	3.66295	28133	139	158	4	2.53165	1.2497	5879|7525|10095|10096	RAC1|YES1|ARPC1B|ACTR3	-1.15726	0	49	0	0	-6.18905	17.8057
0	1	0	0	-2.10036	0	GO:0038096	M010	1	0	GO Biological Processes	19	Fc-gamma receptor signaling pathway involved in phagocytosis	19_GO:0002376 immune system process	-2.10036	5.12394	3.66295	28133	139	158	4	2.53165	1.2497	5879|7525|10095|10096	RAC1|YES1|ARPC1B|ACTR3	-1.15726	0	49	0	0	-6.18905	17.8057
0	1	0	0	-2.08963	0	GO:0038094	M010	1	0	GO Biological Processes	19	Fc-gamma receptor signaling pathway	19_GO:0002376 immune system process	-2.08963	5.08734	3.64354	28133	140	158	4	2.53165	1.2497	5879|7525|10095|10096	RAC1|YES1|ARPC1B|ACTR3	-1.15002	0	49	0	0	-6.18905	17.8057
0	1	0	0	-2.03733	0	GO:0002431	M010	1	0	GO Biological Processes	19	Fc receptor mediated stimulatory signaling pathway	19_GO:0002376 immune system process	-2.03733	4.91192	3.54921	28133	145	158	4	2.53165	1.2497	5879|7525|10095|10096	RAC1|YES1|ARPC1B|ACTR3	-1.10979	0	49	0	0	-6.18905	17.8057
0	0	1	0	0	-6.11699	GO:0046683	M001	1	0	GO Biological Processes	19	response to organophosphorus	19_GO:0050896 response to stimulus	-6.11699	9.03178	8.06697	28133	131	214	9	4.20561	1.37207	358|2039|2185|4724|5138|6647|7430|7442|9693	AQP1|DMTN|PTK2B|NDUFS4|PDE2A|SOD1|EZR|TRPV1|RAPGEF2	-4.06558	0	50	1	1	-6.11699	12.1725
0	0	1	0	0	-5.74791	GO:0014074	M001	1	0	GO Biological Processes	19	response to purine-containing compound	19_GO:0050896 response to stimulus	-5.74791	8.15975	7.56751	28133	145	214	9	4.20561	1.37207	358|2039|2185|4724|5138|6647|7430|7442|9693	AQP1|DMTN|PTK2B|NDUFS4|PDE2A|SOD1|EZR|TRPV1|RAPGEF2	-3.79212	0	50	0	0	-6.11699	12.1725
0	0	1	0	0	-5.10754	GO:0051591	M001	1	0	GO Biological Processes	19	response to cAMP	19_GO:0050896 response to stimulus	-5.10754	9.78977	7.47339	28133	94	214	7	3.27103	1.21594	358|2039|2185|4724|5138|7430|9693	AQP1|DMTN|PTK2B|NDUFS4|PDE2A|EZR|RAPGEF2	-3.33522	0	50	0	0	-6.11699	12.1725
0	0	1	0	0	-4.24596	GO:0071320	M001	1	0	GO Biological Processes	19	cellular response to cAMP	19_GO:0050896 response to stimulus	-4.24596	12.1725	7.19469	28133	54	214	5	2.33645	1.03261	358|2039|5138|7430|9693	AQP1|DMTN|PDE2A|EZR|RAPGEF2	-2.74257	0	50	0	0	-6.11699	12.1725
0	1	0	0	-2.12412	0	GO:0001885	M010	1	0	GO Biological Processes	19	endothelial cell development	19_GO:0032502 developmental process	-3.24757	5.85576	4.95722	28133	71	406	6	1.47783	0.598848	5138|5962|7082|7430|9693|80781	PDE2A|RDX|TJP1|EZR|RAPGEF2|COL18A1	-1.879	0	50	0	0	-6.11699	12.1725
0	0	1	0	0	-2.1142	GO:0061028	M001	1	0	GO Biological Processes	19	establishment of endothelial barrier	19_GO:0032502 developmental process	-3.00341	6.53709	4.88239	28133	53	406	5	1.23153	0.547354	5138|5962|7082|7430|9693	PDE2A|RDX|TJP1|EZR|RAPGEF2	-1.67592	0	50	0	0	-6.11699	12.1725
0	1	1	0	-2.15234	-2.23578	GO:0002064	M011	2	0	GO Biological Processes	19	epithelial cell development	19_GO:0032502 developmental process	-2.96452	3.26854	4.012	28133	212	406	10	2.46305	0.769234	1000|5138|5962|6647|6714|7082|7430|8826|9693|80781	CDH2|PDE2A|RDX|SOD1|SRC|TJP1|EZR|IQGAP1|RAPGEF2|COL18A1	-1.64184	0	50	0	0	-6.11699	12.1725
1	0	1	-2.809	0	-4.5668	GO:0071407	M101	2	0	GO Biological Processes	19	cellular response to organic cyclic compound	19_GO:0050896 response to stimulus	-6.013	3.23931	6.06362	28133	492	406	23	5.66502	1.14729	358|445|478|493|2039|2235|2950|3371|3728|5138|6647|6714|7332|7430|7442|9693|10211|11240|11331|11335|23209|57506|201626	AQP1|ASS1|ATP1A3|ATP2B4|DMTN|FECH|GSTP1|TNC|JUP|PDE2A|SOD1|SRC|UBE2L3|EZR|TRPV1|RAPGEF2|FLOT1|PADI2|PHB2|CBX3|MLC1|MAVS|PDE12	-4.2418	0	51	1	1	-6.013	23.4702
1	0	0	-2.07726	0	0	GO:0097327	M100	1	0	GO Biological Processes	19	response to antineoplastic agent	19_GO:0050896 response to stimulus	-4.17868	5.89729	5.75506	28133	94	406	8	1.97044	0.689759	102|358|445|2235|3178|3728|4924|11335	ADAM10|AQP1|ASS1|FECH|HNRNPA1|JUP|NUCB1|CBX3	-2.66611	0	51	0	0	-6.013	23.4702
1	0	1	-2.33222	0	-2.95289	GO:0031960	M101	2	0	GO Biological Processes	19	response to corticosteroid	19_GO:0050896 response to stimulus	-4.11705	4.55876	5.32354	28133	152	406	10	2.46305	0.769234	210|358|445|2235|2950|3146|5066|6714|7332|11335	ALAD|AQP1|ASS1|FECH|GSTP1|HMGB1|PAM|SRC|UBE2L3|CBX3	-2.61608	0	51	0	0	-6.013	23.4702
1	0	0	-2.73165	0	0	GO:0071385	M100	1	0	GO Biological Processes	19	cellular response to glucocorticoid stimulus	19_GO:0050896 response to stimulus	-3.85729	7.55925	5.89202	28133	55	406	6	1.47783	0.598848	358|445|2235|2950|7332|11335	AQP1|ASS1|FECH|GSTP1|UBE2L3|CBX3	-2.39711	0	51	0	0	-6.013	23.4702
1	0	1	-2.51564	0	-2.42142	GO:0051384	M101	2	0	GO Biological Processes	19	response to glucocorticoid	19_GO:0050896 response to stimulus	-3.80435	4.61954	5.10116	28133	135	406	9	2.21675	0.73068	210|358|445|2235|2950|3146|5066|7332|11335	ALAD|AQP1|ASS1|FECH|GSTP1|HMGB1|PAM|UBE2L3|CBX3	-2.35231	0	51	0	0	-6.013	23.4702
0	0	1	0	0	-2.24804	GO:0035690	M001	1	0	GO Biological Processes	19	cellular response to drug	19_GO:0050896 response to stimulus	-3.69661	2.96124	4.4742	28133	351	406	15	3.69458	0.936149	358|445|493|2235|3178|3728|4062|6647|6714|7442|9343|9647|11335|140885|375790	AQP1|ASS1|ATP2B4|FECH|HNRNPA1|JUP|LY6H|SOD1|SRC|TRPV1|EFTUD2|PPM1F|CBX3|SIRPA|AGRN	-2.25991	0	51	0	0	-6.013	23.4702
1	0	0	-2.6232	0	0	GO:0071384	M100	1	0	GO Biological Processes	19	cellular response to corticosteroid stimulus	19_GO:0050896 response to stimulus	-3.64631	6.92931	5.56349	28133	60	406	6	1.47783	0.598848	358|445|2235|2950|7332|11335	AQP1|ASS1|FECH|GSTP1|UBE2L3|CBX3	-2.21937	0	51	0	0	-6.013	23.4702
1	0	0	-3.55155	0	0	GO:0071549	M100	1	0	GO Biological Processes	19	cellular response to dexamethasone stimulus	19_GO:0050896 response to stimulus	-3.55155	23.4702	8.05536	28133	29	124	3	2.41935	1.37981	445|2235|11335	ASS1|FECH|CBX3	-2.22887	0	51	0	0	-6.013	23.4702
1	0	0	-2.44389	0	0	GO:0048545	M100	1	0	GO Biological Processes	19	response to steroid hormone	19_GO:0050896 response to stimulus	-3.42985	2.922	4.26289	28133	332	406	14	3.44828	0.905562	210|358|445|478|952|2235|2950|3146|5066|6714|7332|11240|11331|11335	ALAD|AQP1|ASS1|ATP1A3|CD38|FECH|GSTP1|HMGB1|PAM|SRC|UBE2L3|PADI2|PHB2|CBX3	-2.03237	0	51	0	0	-6.013	23.4702
1	0	0	-3.20074	0	0	GO:0071548	M100	1	0	GO Biological Processes	19	response to dexamethasone	19_GO:0050896 response to stimulus	-3.20074	17.9115	6.941	28133	38	124	3	2.41935	1.37981	445|2235|11335	ASS1|FECH|CBX3	-1.97634	0	51	0	0	-6.013	23.4702
1	0	0	-3.12804	0	0	GO:1901655	M100	1	0	GO Biological Processes	19	cellular response to ketone	19_GO:0050896 response to stimulus	-3.12804	9.86431	5.66636	28133	92	124	4	3.22581	1.58668	445|2235|3371|11335	ASS1|FECH|TNC|CBX3	-1.92295	0	51	0	0	-6.013	23.4702
1	0	0	-2.90807	0	0	GO:0071466	M100	1	0	GO Biological Processes	19	cellular response to xenobiotic stimulus	19_GO:0050896 response to stimulus	-2.90807	6.3022	4.74832	28133	180	124	5	4.03226	1.76655	445|2235|2944|11335|80777	ASS1|FECH|GSTM1|CBX3|CYB5B	-1.76612	0	51	0	0	-6.013	23.4702
1	0	0	-2.77465	0	0	GO:1901654	M100	1	0	GO Biological Processes	19	response to ketone	19_GO:0050896 response to stimulus	-2.77465	5.8777	4.52421	28133	193	124	5	4.03226	1.76655	445|952|2235|3371|11335	ASS1|CD38|FECH|TNC|CBX3	-1.66617	0	51	0	0	-6.013	23.4702
0	0	1	0	0	-5.9651	R-HSA-15869	M001	1	0	Reactome Gene Sets	6	Metabolism of nucleotides		-5.9651	10.4129	8.29685	28133	101	214	8	3.73832	1.29676	203|353|954|1854|4860|10591|30833|64077	AK1|APRT|ENTPD2|DUT|PNP|DNPH1|NT5C|LHPP	-3.95154	0	52	1	1	-5.9651	23.1993
0	0	1	0	0	-5.11027	GO:0046434	M001	1	0	GO Biological Processes	19	organophosphate catabolic process	19_GO:0008152 metabolic process	-5.11027	5.35588	6.29653	28133	270	214	11	5.14019	1.50947	954|1854|2023|4860|5138|5208|5224|9588|10591|30833|133121	ENTPD2|DUT|ENO1|PNP|PDE2A|PFKFB2|PGAM2|PRDX6|DNPH1|NT5C|ENPP6	-3.33683	0	52	0	0	-5.9651	23.1993
0	0	1	0	0	-4.85795	GO:0034404	M001	1	0	GO Biological Processes	19	nucleobase-containing small molecule biosynthetic process	19_GO:0008152 metabolic process	-4.85795	5.59415	6.1917	28133	235	214	10	4.6729	1.44276	353|954|1854|2023|4860|5138|5208|5224|10591|30833	APRT|ENTPD2|DUT|ENO1|PNP|PDE2A|PFKFB2|PGAM2|DNPH1|NT5C	-3.1561	0	52	0	0	-5.9651	23.1993
0	0	1	0	0	-4.61642	GO:1901292	M001	1	0	GO Biological Processes	19	nucleoside phosphate catabolic process	19_GO:0008152 metabolic process	-4.61642	5.91582	6.10814	28133	200	214	9	4.20561	1.37207	954|1854|2023|4860|5138|5208|5224|10591|30833	ENTPD2|DUT|ENO1|PNP|PDE2A|PFKFB2|PGAM2|DNPH1|NT5C	-2.99312	0	52	0	0	-5.9651	23.1993
0	0	1	0	0	-3.94572	GO:0009166	M001	1	0	GO Biological Processes	19	nucleotide catabolic process	19_GO:0008152 metabolic process	-3.94572	5.50629	5.47097	28133	191	214	8	3.73832	1.29676	1854|2023|4860|5138|5208|5224|10591|30833	DUT|ENO1|PNP|PDE2A|PFKFB2|PGAM2|DNPH1|NT5C	-2.5198	0	52	0	0	-5.9651	23.1993
0	0	1	0	0	-3.75306	R-HSA-8956319	M001	1	0	Reactome Gene Sets	6	Nucleobase catabolism		-3.75306	14.2122	7.04061	28133	37	214	4	1.86916	0.925804	954|4860|10591|30833	ENTPD2|PNP|DNPH1|NT5C	-2.37371	0	52	0	0	-5.9651	23.1993
0	0	1	0	0	-3.56419	GO:0009162	M001	1	0	GO Biological Processes	19	deoxyribonucleoside monophosphate metabolic process	19_GO:0008152 metabolic process	-3.56419	23.1993	8.01575	28133	17	214	3	1.40187	0.803676	1854|10591|30833	DUT|DNPH1|NT5C	-2.2375	0	52	0	0	-5.9651	23.1993
0	0	1	0	0	-3.41525	R-HSA-74259	M001	1	0	Reactome Gene Sets	6	Purine catabolism		-3.41525	20.7573	7.54222	28133	19	214	3	1.40187	0.803676	4860|10591|30833	PNP|DNPH1|NT5C	-2.13335	0	52	0	0	-5.9651	23.1993
0	0	1	0	0	-3.41151	ko00230	M001	1	0	KEGG Pathway	24	Purine metabolism		-3.41151	5.28873	4.9682	28133	174	214	7	3.27103	1.21594	203|318|353|954|4860|5138|30833	AK1|NUDT2|APRT|ENTPD2|PNP|PDE2A|NT5C	-2.13069	0	52	0	0	-5.9651	23.1993
0	0	1	0	0	-3.34739	GO:0006195	M001	1	0	GO Biological Processes	19	purine nucleotide catabolic process	19_GO:0008152 metabolic process	-3.34739	11.1883	6.12017	28133	47	214	4	1.86916	0.925804	4860|5138|10591|30833	PNP|PDE2A|DNPH1|NT5C	-2.08267	0	52	0	0	-5.9651	23.1993
0	0	1	0	0	-3.29462	hsa00230	M001	1	0	KEGG Pathway	24	Purine metabolism		-3.29462	5.05625	4.8064	28133	182	214	7	3.27103	1.21594	203|318|353|954|4860|5138|30833	AK1|NUDT2|APRT|ENTPD2|PNP|PDE2A|NT5C	-2.04292	0	52	0	0	-5.9651	23.1993
0	0	1	0	0	-3.08646	GO:0072523	M001	1	0	GO Biological Processes	19	purine-containing compound catabolic process	19_GO:0008152 metabolic process	-3.08646	9.56092	5.56386	28133	55	214	4	1.86916	0.925804	4860|5138|10591|30833	PNP|PDE2A|DNPH1|NT5C	-1.89389	0	52	0	0	-5.9651	23.1993
0	0	1	0	0	-2.1371	GO:0034656	M001	1	0	GO Biological Processes	19	nucleobase-containing small molecule catabolic process	19_GO:0008152 metabolic process	-2.1371	7.58438	4.16071	28133	52	214	3	1.40187	0.803676	954|4860|30833	ENTPD2|PNP|NT5C	-1.18508	0	52	0	0	-5.9651	23.1993
0	0	1	0	0	-2.08193	ko00240	M001	1	0	KEGG Pathway	24	Pyrimidine metabolism		-2.08193	5.05625	3.62823	28133	104	214	4	1.86916	0.925804	318|1854|4860|30833	NUDT2|DUT|PNP|NT5C	-1.14364	0	52	0	0	-5.9651	23.1993
0	0	1	0	0	-2.01187	hsa00240	M001	1	0	KEGG Pathway	24	Pyrimidine metabolism		-2.01187	4.82432	3.50235	28133	109	214	4	1.86916	0.925804	318|1854|4860|30833	NUDT2|DUT|PNP|NT5C	-1.08913	0	52	0	0	-5.9651	23.1993
0	1	1	0	-5.9602	-2.69872	M266	M011	2	0	Canonical Pathways	11	PID NCADHERIN PATHWAY		-5.9602	26.9783	11.2217	28133	33	158	5	3.16456	1.39266	1000|2596|2934|3728|5879	CDH2|GAP43|GSN|JUP|RAC1	-3.95154	0	53	1	1	-5.9602	26.9783
0	0	1	0	0	-3.02782	GO:0009612	M001	1	0	GO Biological Processes	19	response to mechanical stimulus	19_GO:0050896 response to stimulus	-3.12422	3.43035	4.19482	28133	202	406	10	2.46305	0.769234	358|1000|2185|2934|3371|3728|5138|5879|6714|26047	AQP1|CDH2|PTK2B|GSN|TNC|JUP|PDE2A|RAC1|SRC|CNTNAP2	-1.77562	0	53	0	0	-5.9602	26.9783
0	1	0	0	-2.1356	0	GO:0007163	M010	1	0	GO Biological Processes	19	establishment or maintenance of cell polarity	19_GO:0009987 cellular process	-2.38903	2.9142	3.40138	28133	214	406	9	2.21675	0.73068	358|2185|2934|4134|5879|7430|10096|23122|399687	AQP1|PTK2B|GSN|MAP4|RAC1|EZR|ACTR3|CLASP2|MYO18A	-1.14541	0	53	0	0	-5.9602	26.9783
0	1	1	0	-2.86348	-3.66293	M156	M011	2	0	Canonical Pathways	11	PID ECADHERIN NASCENT AJ PATHWAY		-5.89323	12.4372	8.64884	28133	39	406	7	1.72414	0.646021	3728|5879|6714|7082|8826|10787|55740	JUP|RAC1|SRC|TJP1|IQGAP1|NCKAP1|ENAH	-4.13202	0	54	1	1	-5.89323	15.7755
0	1	1	0	-2.04762	-3.07448	WP2380	M011	2	0	WikiPathways	27	Brain-Derived Neurotrophic Factor (BDNF) signaling pathway		-4.31513	4.81202	5.54951	28133	144	406	10	2.46305	0.769234	1000|1020|2185|4082|4137|4904|5605|5879|6714|140885	CDH2|CDK5|PTK2B|MARCKS|MAPT|YBX1|MAP2K2|RAC1|SRC|SIRPA	-2.78036	0	54	0	0	-5.89323	15.7755
0	1	1	0	-3.81326	-3.31217	M142	M011	2	0	Canonical Pathways	11	PID AJDISS 2PATHWAY		-4.19376	8.66164	6.42861	28133	48	406	6	1.47783	0.598848	102|1000|3728|5879|6714|8826	ADAM10|CDH2|JUP|RAC1|SRC|IQGAP1	-2.67628	0	54	0	0	-5.89323	15.7755
0	1	1	0	-2.23028	-3.85844	M15	M011	2	0	Canonical Pathways	11	PID LYSOPHOSPHOLIPID PATHWAY		-3.85844	10.1125	6.43941	28133	65	214	5	2.33645	1.03261	2185|2781|4137|5879|6714	PTK2B|GNAZ|MAPT|RAC1|SRC	-2.4499	0	54	0	0	-5.89323	15.7755
0	0	1	0	0	-2.20889	R-HSA-373752	M001	1	0	Reactome Gene Sets	6	Netrin-1 signaling		-3.16048	7.07072	5.14661	28133	49	406	5	1.23153	0.547354	3983|5879|6714|7204|7430	ABLIM1|RAC1|SRC|TRIO|EZR	-1.80761	0	54	0	0	-5.89323	15.7755
0	0	1	0	0	-2.09643	WP185	M001	1	0	WikiPathways	27	Integrin-mediated Cell Adhesion		-3.12633	4.70924	4.56356	28133	103	406	7	1.72414	0.646021	726|826|3691|3696|5605|5879|6714	CAPN5|CAPNS1|ITGB4|ITGB8|MAP2K2|RAC1|SRC	-1.77645	0	54	0	0	-5.89323	15.7755
0	0	1	0	0	-3.05445	M118	M001	1	0	Canonical Pathways	11	PID INTEGRIN A9B1 PATHWAY		-3.05445	15.7755	6.47075	28133	25	214	3	1.40187	0.803676	3371|5879|6714	TNC|RAC1|SRC	-1.87032	0	54	0	0	-5.89323	15.7755
0	0	1	0	0	-2.1371	WP4747	M001	1	0	WikiPathways	27	Netrin-UNC5B signaling Pathway		-3.04134	6.6628	4.94582	28133	52	406	5	1.23153	0.547354	2185|3691|5605|5879|6714	PTK2B|ITGB4|MAP2K2|RAC1|SRC	-1.70774	0	54	0	0	-5.89323	15.7755
0	0	1	0	0	-2.69872	M277	M001	1	0	Canonical Pathways	11	PID INTEGRIN A4B1 PATHWAY		-2.90105	8.39916	5.14634	28133	33	406	4	0.985222	0.490178	2185|5786|5879|6714	PTK2B|PTPRA|RAC1|SRC	-1.58511	0	54	0	0	-5.89323	15.7755
0	0	1	0	0	-2.81979	M72	M001	1	0	Canonical Pathways	11	PID NECTIN PATHWAY		-2.81979	13.1463	5.82753	28133	30	214	3	1.40187	0.803676	5879|6714|8826	RAC1|SRC|IQGAP1	-1.70044	0	54	0	0	-5.89323	15.7755
0	0	1	0	0	-2.78977	WP2324	M001	1	0	WikiPathways	27	AGE/RAGE pathway		-2.78977	7.96743	4.9614	28133	66	214	4	1.86916	0.925804	5879|6647|6714|7430	RAC1|SOD1|SRC|EZR	-1.67834	0	54	0	0	-5.89323	15.7755
0	0	1	0	0	-2.60709	M160	M001	1	0	Canonical Pathways	11	PID AVB3 INTEGRIN PATHWAY		-2.60709	7.10609	4.60469	28133	74	214	4	1.86916	0.925804	1278|2185|5879|6714	COL1A2|PTK2B|RAC1|SRC	-1.54362	0	54	0	0	-5.89323	15.7755
0	0	1	0	0	-2.56493	WP2037	M001	1	0	WikiPathways	27	Prolactin Signaling Pathway		-2.56493	6.91909	4.52374	28133	76	214	4	1.86916	0.925804	5478|5879|6714|140885	PPIA|RAC1|SRC|SIRPA	-1.51184	0	54	0	0	-5.89323	15.7755
0	0	1	0	0	-2.17148	R-HSA-4420097	M001	1	0	Reactome Gene Sets	6	VEGFA-VEGFR2 Pathway		-2.52227	4.24243	3.89086	28133	98	406	6	1.47783	0.598848	805|2185|3728|5879|6714|10787	CALM2|PTK2B|JUP|RAC1|SRC|NCKAP1	-1.26132	0	54	0	0	-5.89323	15.7755
0	0	1	0	0	-2.52157	M94	M001	1	0	Canonical Pathways	11	PID FAS PATHWAY		-2.52157	10.3786	5.06493	28133	38	214	3	1.40187	0.803676	637|6714|7430	BID|SRC|EZR	-1.47947	0	54	0	0	-5.89323	15.7755
0	0	1	0	0	-2.504	R-HSA-6806834	M001	1	0	Reactome Gene Sets	6	Signaling by MET		-2.504	6.65634	4.40766	28133	79	214	4	1.86916	0.925804	1278|5879|6714|7314	COL1A2|RAC1|SRC|UBB	-1.46504	0	54	0	0	-5.89323	15.7755
0	0	1	0	0	-2.42721	R-HSA-8875878	M001	1	0	Reactome Gene Sets	6	MET promotes cell motility		-2.42721	9.61922	4.83532	28133	41	214	3	1.40187	0.803676	1278|5879|6714	COL1A2|RAC1|SRC	-1.40516	0	54	0	0	-5.89323	15.7755
0	1	0	0	-2.1074	0	ko04520	M010	1	0	KEGG Pathway	24	Adherens junction		-2.41208	4.81202	3.91906	28133	72	406	5	1.23153	0.547354	5879|6714|7082|7525|8826	RAC1|SRC|TJP1|YES1|IQGAP1	-1.16645	0	54	0	0	-5.89323	15.7755
0	0	1	0	0	-2.03943	R-HSA-194138	M001	1	0	Reactome Gene Sets	6	Signaling by VEGF		-2.33427	3.88559	3.61875	28133	107	406	6	1.47783	0.598848	805|2185|3728|5879|6714|10787	CALM2|PTK2B|JUP|RAC1|SRC|NCKAP1	-1.09791	0	54	0	0	-5.89323	15.7755
0	1	1	0	-5.82706	-2.15611	GO:0099175	M011	2	0	GO Biological Processes	19	regulation of postsynapse organization	19_GO:0071840 cellular component organization or biogenesis	-5.82706	12.5899	8.68157	28133	99	158	7	4.43038	1.63701	102|348|1000|1020|2596|55737|94030	ADAM10|APOE|CDH2|CDK5|GAP43|VPS35|LRRC4B	-3.84809	0	55	1	1	-5.82706	17.8057
0	1	0	0	-3.19979	0	GO:0099068	M010	1	0	GO Biological Processes	19	postsynapse assembly	19_GO:0032502 developmental process	-3.19979	17.8057	6.92125	28133	30	158	3	1.89873	1.08578	1000|2596|94030	CDH2|GAP43|LRRC4B	-1.97634	0	55	0	0	-5.82706	17.8057
0	1	0	0	-3.15738	0	GO:0099084	M010	1	0	GO Biological Processes	19	postsynaptic specialization organization	19_GO:0071840 cellular component organization or biogenesis	-3.15738	17.2313	6.79532	28133	31	158	3	1.89873	1.08578	1000|2596|94030	CDH2|GAP43|LRRC4B	-1.94309	0	55	0	0	-5.82706	17.8057
0	1	0	0	-2.52316	0	GO:0007416	M010	1	0	GO Biological Processes	19	synapse assembly	19_GO:0032502 developmental process	-2.52316	5.14615	4.11097	28133	173	158	5	3.16456	1.39266	1000|1020|2596|55737|94030	CDH2|CDK5|GAP43|VPS35|LRRC4B	-1.48064	0	55	0	0	-5.82706	17.8057
0	1	1	0	-4.76485	-2.43016	GO:0070371	M011	2	0	GO Biological Processes	19	ERK1 and ERK2 cascade	19_GO:0023052 signaling	-5.8112	3.8143	6.19422	28133	327	406	18	4.4335	1.02156	348|408|960|1652|2185|2244|2950|3146|4035|4282|5300|5605|6714|7430|9693|11331|65009|140885	APOE|ARRB1|CD44|DDT|PTK2B|FGB|GSTP1|HMGB1|LRP1|MIF|PIN1|MAP2K2|SRC|EZR|RAPGEF2|PHB2|NDRG4|SIRPA	-4.0603	0	56	1	1	-5.8112	4.20939
0	1	1	0	-4.19886	-2.59634	GO:0070372	M011	2	0	GO Biological Processes	19	regulation of ERK1 and ERK2 cascade	19_GO:0023052 signaling	-5.55606	3.83708	6.04821	28133	307	406	17	4.18719	0.994055	348|408|960|1652|2185|2244|2950|3146|4035|4282|5300|6714|7430|9693|11331|65009|140885	APOE|ARRB1|CD44|DDT|PTK2B|FGB|GSTP1|HMGB1|LRP1|MIF|PIN1|SRC|EZR|RAPGEF2|PHB2|NDRG4|SIRPA	-3.85517	0	56	0	0	-5.8112	4.20939
0	1	0	0	-4.52573	0	GO:0070374	M010	1	0	GO Biological Processes	19	positive regulation of ERK1 and ERK2 cascade	19_GO:0048518 positive regulation of biological process	-4.80782	4.20939	5.70285	28133	214	406	13	3.20197	0.873733	348|408|960|1652|2185|2244|3146|4035|4282|6714|9693|11331|65009	APOE|ARRB1|CD44|DDT|PTK2B|FGB|HMGB1|LRP1|MIF|SRC|RAPGEF2|PHB2|NDRG4	-3.20173	0	56	0	0	-5.8112	4.20939
0	1	1	0	-4.10399	-2.33966	GO:0043408	M011	2	0	GO Biological Processes	19	regulation of MAPK cascade	19_GO:0023052 signaling	-4.48578	2.43462	4.7857	28133	740	406	26	6.40394	1.21504	348|408|960|1000|1652|2185|2244|2873|2950|3146|4035|4282|5300|5478|5605|5716|6647|6714|7314|7430|8826|9693|11331|23043|65009|140885	APOE|ARRB1|CD44|CDH2|DDT|PTK2B|FGB|GPS1|GSTP1|HMGB1|LRP1|MIF|PIN1|PPIA|MAP2K2|PSMD10|SOD1|SRC|UBB|EZR|IQGAP1|RAPGEF2|PHB2|TNIK|NDRG4|SIRPA	-2.9269	0	56	0	0	-5.8112	4.20939
0	1	1	0	-3.81532	-2.29194	GO:2000146	M011	2	0	GO Biological Processes	19	negative regulation of cell motility	19_GO:0040011 locomotion	-4.3192	3.21359	5.006	28133	345	406	16	3.94089	0.965613	348|493|1652|2950|3146|3728|4035|4282|4345|5217|5300|5879|7070|11240|23122|65009	APOE|ATP2B4|DDT|GSTP1|HMGB1|JUP|LRP1|MIF|CD200|PFN2|PIN1|RAC1|THY1|PADI2|CLASP2|NDRG4	-2.78311	0	56	0	0	-5.8112	4.20939
0	1	0	0	-4.20792	0	GO:0043410	M010	1	0	GO Biological Processes	19	positive regulation of MAPK cascade	19_GO:0048518 positive regulation of biological process	-4.20792	3.92773	5.1821	28133	544	158	12	7.59494	2.10757	348|408|960|1000|1652|2244|4035|5605|6647|11331|23043|65009	APOE|ARRB1|CD44|CDH2|DDT|FGB|LRP1|MAP2K2|SOD1|PHB2|TNIK|NDRG4	-2.71648	0	56	0	0	-5.8112	4.20939
0	1	0	0	-4.11125	0	GO:0040013	M010	1	0	GO Biological Processes	19	negative regulation of locomotion	19_GO:0040011 locomotion	-4.20449	3.01274	4.84976	28133	391	406	17	4.18719	0.994055	348|493|1652|2950|3146|3728|4035|4282|4345|5217|5300|5879|7070|10155|11240|23122|65009	APOE|ATP2B4|DDT|GSTP1|HMGB1|JUP|LRP1|MIF|CD200|PFN2|PIN1|RAC1|THY1|TRIM28|PADI2|CLASP2|NDRG4	-2.68506	0	56	0	0	-5.8112	4.20939
0	1	1	0	-3.23772	-2.40642	GO:0030336	M011	2	0	GO Biological Processes	19	negative regulation of cell migration	19_GO:0040011 locomotion	-3.98868	3.14969	4.75333	28133	330	406	15	3.69458	0.936149	348|493|1652|2950|3146|3728|4035|4282|4345|5217|5879|7070|11240|23122|65009	APOE|ATP2B4|DDT|GSTP1|HMGB1|JUP|LRP1|MIF|CD200|PFN2|RAC1|THY1|PADI2|CLASP2|NDRG4	-2.50576	0	56	0	0	-5.8112	4.20939
[truncated: 574 more rows]
