# Supplementary material for: Olfactory Bulb Proteomics Reveals Widespread Proteostatic Disturbances in Mixed Dementia and Guides for Potential Serum Biomarkers to Discriminate Alzheimer Disease and Mixed Dementia Phenotypes
Source: Preprints.org preprint supplement (doi:10.20944/preprints202104.0748.v1), 2021-04-28
Supplement: Supplementary file 5 [file Supplementary table 1. Serum samples included in the study.xlsx]

## Sheet: Hoja1
	Sample	Diagnosis	Sex	Age		Sample	Diagnosis	Sex	Age		Sample	Diagnosis	Sex	Age
	AAA4254857	Control	f	71		G11400	AD	f	71		G10913	MixD	m	80
	AAA4263608	Control	f	68		G11404	AD	f	84		G10861	MixD	m	87
	AAA4449917	Control	f	71		G11409	AD	f	83		G11026	MixD	m	84
	AAA4450258	Control	f	70		G11386	AD	f	79		G10824	MixD	m	72
	AAA4450688	Control	f	69		G11391	AD	f	72		G10698	MixD	m	85
	AAA4452749	Control	f	72		G11352	AD	f	78		G9013	MixD	m	86
	AAA4453325	Control	f	68		G11720	AD	f	79		G9217	MixD	m	74
	AAA4456683	Control	f	69		G11694	AD	f	76		G10281	MixD	m	79
	AAA4457104	Control	f	69		G11703	AD	f	74		G10240	MixD	m	82
	AAA4458586	Control	f	65		G11680	AD	f	69		G10883	MixD	f	86
	AAA4459533	Control	f	66		G11681	AD	f	87		G11020	MixD	f	80
	AAA4802051	Control	f	70		G11684	AD	f	-		G9802	MixD	f	73
	AAA4810325	Control	f	67		G11685	AD	f	84		G10074	MixD	f	86
	AAA5086414	Control	f	65		G10923	AD	f	74		G10087	MixD	f	68
	AAA5087891	Control	f	67		G10892	AD	f	77		G10091	MixD	f	70
	AAA5461137	Control	f	65		G10876	AD	f	71		G11579	MixD	f	71
	AAA4259192	Control	m	73		G11410	AD	m	68		G7950	MixD	f	76
	AAA4259336	Control	m	72		G11411	AD	m	85		G10312	MixD	f	87
	AAA4259488	Control	m	72		G11363	AD	m	83		N1533	MixD	f	73
	AAA4263935	Control	m	71		G11365	AD	m	77
	AAA4264047	Control	m	77		G11332	AD	m	78
	AAA4264665	Control	m	73		G11339	AD	m	54
	AAA4449108	Control	m	78		G11699	AD	m	76
	AAA4449769	Control	m	70		G11702	AD	m	59
	AAA4449856	Control	m	75		G11674	AD	m	72
	AAA4451213	Control	m	65		G10911	AD	m	76
	AAA4451472	Control	m	67		G10937	AD	m	56
	AAA4451736	Control	m	77		G11048	AD	m	80
	AAA4452554	Control	m	72		G11051	AD	m	81
	AAA4455326	Control	m	70		G8437	AD	m	79
	AAA4455876	Control	m	76		G8472	AD	m	75
	AAA4456502	Control	m	70
